# Supplementary material for: Aspergillus fumigatus High Osmolarity Glycerol Mitogen Activated Protein Kinases SakA and MpkC Physically Interact During Osmotic and Cell Wall Stresses
Source: Front Microbiol. 2019 May 7;10:918. doi: 10.3389/fmicb.2019.00918 (PMC6514138; doi:10.3389/fmicb.2019.00918)
Supplement: Supplementary file 1 [file Table_1.xls]

## Sheet: MpkC GFP_CR_5min
Supplementary Table S1 - Proteins identified as interacting with MpkC::GFP (after subtracting from the wild-type strain) in presence of Congo Red 300µg/mL (5, 15, 30 and 60 min)
Accession	Description	Score	Coverage	# Proteins	# Unique Peptides	# Peptides	# PSMs	# AAs	MW [kDa]	calc. pI
Afu3g06550	Afu3g06550 AspGDID:ASPL0000105066 COORDS:Chr3_A_fumigatus_Af293:1623469-1625008W, translated using codon table 1 (469 amino acids) Uncharacterized ORF; Has domain(s) with predicted phosphatase activity, phosphoserine phosphatase activity and role in L-serine biosynthetic process, metabolic process	141.051	61.83	1	19	19	29	469	51.8419	5.89697
Afu5g09100	mpkC AspGDID:ASPL0000107981 COORDS:Chr5_A_fumigatus_Af293:2340794-2342470W, translated using codon table 1 (378 amino acids) Verified ORF; Putative mitogen activated protein kinase (MAPK); involved in the oxidative stress response; transcript abundance increases in response to carbon source and oxidative stress	117.354	66.93	1	15	18	26	378	43.2801	5.75732
Afu1g12940	sakA AspGDID:ASPL0000102362 COORDS:Chr1_A_fumigatus_Af293:3428181-3429807W, translated using codon table 1 (366 amino acids) Verified ORF; Putative mitogen-activated protein kinase (MAPK) with predicted roles in the osmotic and oxidative stress responses; involved in sensing nitrogen in the medium	42.9133	34.43	1	7	8	10	366	41.9334	5.60498
Afu6g03460	Afu6g03460 AspGDID:ASPL0000108801 COORDS:Chr6_A_fumigatus_Af293:741171-742895W, translated using codon table 1 (574 amino acids) Uncharacterized ORF; Has domain(s) with predicted ATP binding activity	30.9594	20.56	1	7	7	7	574	63.4223	6.13818
Afu3g08650	Afu3g08650 AspGDID:ASPL0000105267 COORDS:Chr3_A_fumigatus_Af293:2214642-2217724W, translated using codon table 1 (939 amino acids) Uncharacterized ORF; Putative C1-tetrahydrofolate synthase; transcript up-regulated in conidia exposed to neutrophils	28.651	13.95	1	9	9	9	939	100.46	7.44482
Afu6g02910	argEF AspGDID:ASPL0000108747 COORDS:Chr6_A_fumigatus_Af293:603327-600472C, translated using codon table 1 (906 amino acids) Verified ORF; Mitochondrial bifunctional enzyme with N-acetyl-gamma-glutamyl-phosphate reductase and acetylglutamate kinase activity, catalyzes the second and third step in arginine biosynthesis	25.2659	11.7	1	8	8	8	906	99.3845	8.14795
Afu2g07420	sac6 AspGDID:ASPL0000103465 COORDS:Chr2_A_fumigatus_Af293:1889973-1887748C, translated using codon table 1 (646 amino acids) Verified ORF; Putative actin-bundling protein, fimbrin; conidia-enriched protein	22.7089	14.71	1	6	6	6	646	72.4336	6.12549
Afu6g02540	Afu6g02540 AspGDID:ASPL0000108708 COORDS:Chr6_A_fumigatus_Af293:481139-483203W, translated using codon table 1 (643 amino acids) Uncharacterized ORF; Has domain(s) with predicted actin binding activity	20.7183	14.31	1	7	7	7	643	65.9529	9.5249
Afu1g10310	Afu1g10310 AspGDID:ASPL0000102095 COORDS:Chr1_A_fumigatus_Af293:2655644-2657900W, translated using codon table 1 (604 amino acids) Uncharacterized ORF; Putative RNase L inhibitor of the ABC superfamily	19.1446	11.92	1	5	5	5	604	68.1972	8.23584
Afu2g01040	Afu2g01040 AspGDID:ASPL0000102935 COORDS:Chr2_A_fumigatus_Af293:239825-238336C, translated using codon table 1 (379 amino acids) Uncharacterized ORF; Putative formaldehyde dehydrogenase; transcript up-regulated in conidia exposed to neutrophils	19.0448	25.59	1	5	5	5	379	40.0182	7.26904
Afu6g08360	Afu6g08360 AspGDID:ASPL0000109193 COORDS:Chr6_A_fumigatus_Af293:1958167-1959214W, translated using codon table 1 (332 amino acids) Uncharacterized ORF; Thiazole biosynthesis enzyme; hypoxia induced protein; induced by gliotoxin exposure	18.5829	22.89	1	4	4	4	332	35.469	5.84619
Afu1g05490	Afu1g05490 AspGDID:ASPL0000101717 COORDS:Chr1_A_fumigatus_Af293:1568506-1572348W, translated using codon table 1 (1256 amino acids) Uncharacterized ORF; Ortholog of <i>A. nidulans FGSC A4</i> : AN4072, <i>A. niger CBS 513.88</i> : An18g04300, <i>A. oryzae RIB40</i> : AO090009000396, <i>Aspergillus wentii</i> : Aspwe1_0169302 and <i>Aspergillus sydowii</i> : Aspsy1_0057624	17.0371	5.41	1	4	4	6	1256	139.306	9.31982
Afu3g08540	Afu3g08540 AspGDID:ASPL0000105256 COORDS:Chr3_A_fumigatus_Af293:2192405-2191310C, translated using codon table 1 (323 amino acids) Uncharacterized ORF; Ortholog(s) have calcium ion binding, zinc ion binding activity and role in asexual sporulation, axial cellular bud site selection, bipolar cellular bud site selection, regulation of COPII vesicle coating	15.8961	19.5	1	2	2	2	323	36.0919	7.34229
Afu2g16020	Afu2g16020 AspGDID:ASPL0000104319 COORDS:Chr2_A_fumigatus_Af293:4237810-4239808W, translated using codon table 1 (566 amino acids) Uncharacterized ORF; Putative heat shock protein; transcript induced during conidial germination	15.4891	14.49	1	6	6	6	566	61.6862	6.87354
Afu2g11840	cyc8 AspGDID:ASPL0000103898 COORDS:Chr2_A_fumigatus_Af293:3056794-3059852W, translated using codon table 1 (867 amino acids) Verified ORF; Transcriptional corepressor; ortholog of <i>A. nidulans</i> ssnF; calcium induced; mutation causes increased azole sensitivity	14.8919	6.23	1	5	5	6	867	94.5764	6.72705
Afu1g05610	Afu1g05610 AspGDID:ASPL0000101729 COORDS:Chr1_A_fumigatus_Af293:1612356-1610038C, translated using codon table 1 (616 amino acids) Verified ORF; Putative protein phosphotase 2a 65kd regulatory subunit; conidia-enriched protein; protein induced by heat shock	14.3294	12.01	1	4	4	4	616	69.1473	4.85596
Afu2g07520	Afu2g07520 AspGDID:ASPL0000363027 COORDS:Chr2_A_fumigatus_Af293:1926201-1928684W, translated using codon table 1 (614 amino acids) Uncharacterized ORF; Ortholog(s) have aminopeptidase activity, epoxide hydrolase activity, role in cellular lipid metabolic process, protein catabolic process and cytosol, extracellular region, nucleus localization	14.2419	16.61	1	7	7	7	614	69.6784	6.21436
Afu1g15960	Afu1g15960 AspGDID:ASPL0000102659 COORDS:Chr1_A_fumigatus_Af293:4331468-4333260W, translated using codon table 1 (554 amino acids) Uncharacterized ORF; Ortholog(s) have flavin adenine dinucleotide binding, glutathione transferase activity, glutathione-disulfide reductase activity	14.184	12.27	1	4	4	4	554	60.0714	8.70459
Afu4g07130	mvd1 AspGDID:ASPL0000106427 COORDS:Chr4_A_fumigatus_Af293:1851690-1852972W, translated using codon table 1 (404 amino acids) Uncharacterized ORF; Diphosphomevalonate decarboxylase; SrbA-regulated during hypoxia	13.9108	19.8	1	4	4	4	404	43.1272	6.01123
Afu5g02410	Afu5g02410 AspGDID:ASPL0000107421 COORDS:Chr5_A_fumigatus_Af293:623486-621886C, translated using codon table 1 (505 amino acids) Uncharacterized ORF; Putative DEAD/DEAH box helicase; predicted gene pair with AFUA_3G08160 (eukaryotic translation initiation factor eIF4A; ATP-dependent RNA helicase, tifA)	13.815	7.72	1	2	5	5	505	57.4434	6.99072
Afu5g06500	Afu5g06500 AspGDID:ASPL0000107726 COORDS:Chr5_A_fumigatus_Af293:1587081-1588611W, translated using codon table 1 (447 amino acids) Uncharacterized ORF; Acyl-CoA dehydrogenase family protein with a predicted role in fatty acid beta oxidation; induced by exposure to artemisinin	13.7051	11.86	1	4	4	4	447	49.1848	8.90967
Afu5g00720	Afu5g00720 AspGDID:ASPL0000107256 COORDS:Chr5_A_fumigatus_Af293:204504-203702C, translated using codon table 1 (248 amino acids) Uncharacterized ORF; Has domain(s) with predicted N-acetyltransferase activity	13.6748	27.02	1	5	5	5	248	29.0426	5.32568
Afu3g07790	Afu3g07790 AspGDID:ASPL0000105183 COORDS:Chr3_A_fumigatus_Af293:1963894-1965412W, translated using codon table 1 (464 amino acids) Uncharacterized ORF; Argininosuccinate lyase; hypoxia induced protein	12.5892	16.59	1	5	5	5	464	51.8196	6.27783
Afu6g04010	Afu6g04010 AspGDID:ASPL0000108856 COORDS:Chr6_A_fumigatus_Af293:901498-904822W, translated using codon table 1 (962 amino acids) Uncharacterized ORF; Ortholog(s) have importin-alpha export receptor activity, role in cell division, protein export from nucleus and nuclear membrane localization	12.3098	5.3	1	3	3	3	962	108.421	5.37646
Afu5g07050	Afu5g07050 AspGDID:ASPL0000107780 COORDS:Chr5_A_fumigatus_Af293:1745205-1746800W, translated using codon table 1 (463 amino acids) Uncharacterized ORF; Proteasome regulatory particle subunit; transcript induced by exposure to human airway epithelial cells	12.2709	12.96	1	4	4	4	463	51.4175	5.75732
Afu5g09860	Afu5g09860 AspGDID:ASPL0000108054 COORDS:Chr5_A_fumigatus_Af293:2552613-2551525C, translated using codon table 1 (287 amino acids) Uncharacterized ORF; Putative esterase	12.258	16.38	1	4	4	4	287	31.5205	6.72705
Afu4g03322	Afu4g03322 AspGDID:ASPL0000365151 COORDS:Chr4_A_fumigatus_Af293:944673-943800C, translated using codon table 1 (257 amino acids) Uncharacterized ORF; Ortholog of <i>A. nidulans FGSC A4</i> : AN7177, <i>A. niger CBS 513.88</i> : An14g01990, <i>A. oryzae RIB40</i> : AO090011000139, <i>Aspergillus sydowii</i> : Aspsy1_0052594 and <i>Aspergillus terreus NIH2624</i> : ATET_02136	12.0987	19.07	1	4	4	4	257	28.9266	4.86865
Afu6g06350	Afu6g06350 AspGDID:ASPL0000108996 COORDS:Chr6_A_fumigatus_Af293:1349712-1348557C, translated using codon table 1 (298 amino acids) Uncharacterized ORF; Proteasome subunit alpha type 3; reacts with rabbit immunosera exposed to A. fumigatus conidia	12.03	17.11	1	5	5	5	298	31.8111	5.21143
Afu6g07620	Afu6g07620 AspGDID:ASPL0000109122 COORDS:Chr6_A_fumigatus_Af293:1731263-1729750C, translated using codon table 1 (437 amino acids) Uncharacterized ORF; GDP-mannose pyrophosphorylase A; repressed by exposure to artemisinin	11.8523	10.53	1	3	3	3	437	48.2561	7.29834
Afu4g07650	cyp6 AspGDID:ASPL0000106480 COORDS:Chr4_A_fumigatus_Af293:1987776-1988776W, translated using codon table 1 (209 amino acids) Uncharacterized ORF; Putative peptidyl-prolyl cis-trans isomerase	11.6521	17.7	1	3	3	3	209	22.9459	8.27979
Afu3g07680	Afu3g07680 AspGDID:ASPL0000105174 COORDS:Chr3_A_fumigatus_Af293:1941416-1940148C, translated using codon table 1 (422 amino acids) Uncharacterized ORF; Putative ran GTPase activating protein	11.4944	12.09	1	3	3	3	422	46.1998	4.67822
Afu1g06790	Afu1g06790 AspGDID:ASPL0000101847 COORDS:Chr1_A_fumigatus_Af293:1937397-1941009W, translated using codon table 1 (1095 amino acids) Uncharacterized ORF; Ortholog(s) have role in protein import into nucleus, regulation of mitotic cell cycle and cytosol, nuclear membrane, nucleolus localization	11.2748	3.93	1	3	3	3	1095	121.355	4.76709
Afu5g05500	Afu5g05500 AspGDID:ASPL0000107629 COORDS:Chr5_A_fumigatus_Af293:1277444-1278887W, translated using codon table 1 (424 amino acids) Uncharacterized ORF; Ortholog(s) have phosphoglycerate dehydrogenase activity, role in serine family amino acid biosynthetic process and cytosol localization	11.1165	10.14	1	3	3	3	424	45.8868	7.00537
Afu6g02830	Afu6g02830 AspGDID:ASPL0000108738 COORDS:Chr6_A_fumigatus_Af293:575599-576182W, translated using codon table 1 (130 amino acids) Uncharacterized ORF; Has domain(s) with predicted oxidoreductase activity, role in oxidation-reduction process and mitochondrion localization	10.6652	36.15	1	3	3	3	130	14.3505	8.19189
Afu2g01920	Afu2g01920 AspGDID:ASPL0000103022 COORDS:Chr2_A_fumigatus_Af293:479695-481689W, translated using codon table 1 (664 amino acids) Uncharacterized ORF; Ortholog(s) have cytosol localization	10.584	8.28	1	3	3	3	664	74.2475	7.1958
Afu2g12900	Afu2g12900 AspGDID:ASPL0000104003 COORDS:Chr2_A_fumigatus_Af293:3308048-3307099C, translated using codon table 1 (271 amino acids) Uncharacterized ORF; Ortholog(s) have urease activity, role in urea catabolic process and cytosol, nucleus localization	10.5669	15.13	1	3	3	3	271	29.1578	6.22705
Afu1g05560	Afu1g05560 AspGDID:ASPL0000101724 COORDS:Chr1_A_fumigatus_Af293:1596516-1594882C, translated using codon table 1 (389 amino acids) Uncharacterized ORF; Ortholog(s) have role in cytoplasmic translation, filamentous growth and cytosol, nucleus, polysomal ribosome, polysome localization	10.5652	10.28	1	3	3	3	389	42.7828	8.74854
Afu3g11640	Afu3g11640 AspGDID:ASPL0000105562 COORDS:Chr3_A_fumigatus_Af293:3058607-3059789W, translated using codon table 1 (368 amino acids) Uncharacterized ORF; Homoserine dehydrogenase; no human homolog	10.5231	17.93	1	5	5	5	368	38.4803	5.87158
Afu2g13240	Afu2g13240 AspGDID:ASPL0000104038 COORDS:Chr2_A_fumigatus_Af293:3402661-3404769W, translated using codon table 1 (506 amino acids) Uncharacterized ORF; Putative V-type ATPase, B subunit; transcript induced by exposure to human airway epithelial cells	10.4946	7.71	1	3	3	3	506	56.383	5.99854
Afu2g12870	sec17 AspGDID:ASPL0000104000 COORDS:Chr2_A_fumigatus_Af293:3300543-3301681W, translated using codon table 1 (292 amino acids) Uncharacterized ORF; Putative vesicular-fusion protein; transcript induced by exposure to human airway epithelial cells	10.2716	12.33	1	2	2	2	292	32.8206	5.49072
Afu8g04810	Afu8g04810 AspGDID:ASPL0000110815 COORDS:Chr8_A_fumigatus_Af293:1104248-1103015C, translated using codon table 1 (336 amino acids) Uncharacterized ORF; Ortholog(s) have role in circadian regulation of gene expression, conidium formation, establishment or maintenance of bipolar cell polarity regulating cell shape and protein phosphorylation, <a href="#GOsection">more</a>	9.79849	10.12	1	3	3	3	336	39.5131	7.31299
Afu5g12260	tigA AspGDID:ASPL0000108282 COORDS:Chr5_A_fumigatus_Af293:3183118-3184297W, translated using codon table 1 (368 amino acids) Uncharacterized ORF; Putative disulfide isomerase	9.67488	10.87	1	3	3	3	368	40.2289	6.44287
Afu4g03650	Afu4g03650 AspGDID:ASPL0000106184 COORDS:Chr4_A_fumigatus_Af293:1028974-1030431W, translated using codon table 1 (446 amino acids) Uncharacterized ORF; Ribosome associated DnaJ chaperone Zuotin	9.54669	8.07	1	3	3	3	446	51.2243	8.19189
Afu1g08790	Afu1g08790 AspGDID:ASPL0000101945 COORDS:Chr1_A_fumigatus_Af293:2260124-2263969W, translated using codon table 1 (1072 amino acids) Uncharacterized ORF; Ortholog(s) have nuclear export signal receptor activity	9.47424	5.6	1	7	7	7	1072	123.425	5.43994
Afu4g10730	Afu4g10730 AspGDID:ASPL0000106786 COORDS:Chr4_A_fumigatus_Af293:2795549-2793995C, translated using codon table 1 (458 amino acids) Uncharacterized ORF; Ortholog(s) have ATP-dependent 3'-5' DNA helicase activity, ATP-dependent 5'-3' DNA helicase activity, sequence-specific DNA binding activity	9.42373	8.95	1	2	2	3	458	49.6891	6.29053
Afu4g14040	Afu4g14040 AspGDID:ASPL0000107109 COORDS:Chr4_A_fumigatus_Af293:3664993-3662573C, translated using codon table 1 (611 amino acids) Uncharacterized ORF; Ortholog of <i>A. nidulans FGSC A4</i> : AN3519, AN2646, AN0587, AN0866, AN7370 and <i>A. fumigatus Af293</i> : Afu1g15200, Afu3g03790, Afu5g06900, Afu7g08575	9.42125	5.4	1	2	2	2	611	68.0235	5.96045
Afu5g02360	Afu5g02360 AspGDID:ASPL0000107416 COORDS:Chr5_A_fumigatus_Af293:608651-606106C, translated using codon table 1 (698 amino acids) Uncharacterized ORF; Ortholog(s) have role in hyphal growth, peroxisome organization, vacuole organization and Golgi apparatus localization	9.29335	9.31	1	4	4	4	698	78.1349	8.17725
Afu6g07760	Afu6g07760 AspGDID:ASPL0000109136 COORDS:Chr6_A_fumigatus_Af293:1770437-1772048W, translated using codon table 1 (492 amino acids) Uncharacterized ORF; Ortholog(s) have structural molecule activity	9.28443	7.72	1	3	3	3	492	54.4651	6.49365
Afu1g02410	Afu1g02410 AspGDID:ASPL0000101411 COORDS:Chr1_A_fumigatus_Af293:702057-703574W, translated using codon table 1 (469 amino acids) Uncharacterized ORF; Ortholog(s) have ATP-dependent 3'-5' DNA helicase activity, ATP-dependent 5'-3' DNA helicase activity and role in box C/D snoRNP assembly, histone exchange, rRNA processing, regulation of transcription from RNA polymerase II promoter	9.27903	8.74	1	3	3	3	469	51.3145	5.8335
Afu7g02310	Afu7g02310 AspGDID:ASPL0000110026 COORDS:Chr7_A_fumigatus_Af293:629238-628529C, translated using codon table 1 (217 amino acids) Uncharacterized ORF; Putative adenine phosphoribosyltransferase 1; transcript induced by exposure to human airway epithelial cells; induced by gliotoxin exposure	8.39184	15.21	1	2	2	2	217	23.6063	6.39209
Afu8g04730	Afu8g04730 AspGDID:ASPL0000110807 COORDS:Chr8_A_fumigatus_Af293:1078214-1075934C, translated using codon table 1 (728 amino acids) Uncharacterized ORF; Oligopeptidase family protein	7.81563	10.99	1	5	5	5	728	79.9422	6.15088
Afu5g09910	Afu5g09910 AspGDID:ASPL0000108059 COORDS:Chr5_A_fumigatus_Af293:2564144-2563392C, translated using codon table 1 (217 amino acids) Uncharacterized ORF; Putative p-nitroreductase family protein; protein induced by heat shock; Yap1-dependent induction in response to hydrogen peroxide; induced by gliotoxin exposure	7.77864	13.36	1	3	3	3	217	24.2985	5.90967
Afu5g10370	sdh2 AspGDID:ASPL0000108103 COORDS:Chr5_A_fumigatus_Af293:2655836-2654821C, translated using codon table 1 (299 amino acids) Uncharacterized ORF; Iron-sulfur protein subunit of succinate dehydrogenase with a predicted role in the citric acid cycle; transcript up-regulated in conidia exposed to neutrophils; induced by exposure to artemisinin; transcript downregulated by hypoxia	7.66336	12.04	1	3	3	3	299	33.894	8.92432
Afu4g04120	Afu4g04120 AspGDID:ASPL0000106230 COORDS:Chr4_A_fumigatus_Af293:1160684-1163043W, translated using codon table 1 (598 amino acids) Uncharacterized ORF; Ortholog(s) have guanyl-nucleotide exchange factor adaptor activity	7.54829	4.68	1	2	2	2	598	66.2801	7.56201
Afu5g07000	Afu5g07000 AspGDID:ASPL0000107775 COORDS:Chr5_A_fumigatus_Af293:1735022-1736346W, translated using codon table 1 (360 amino acids) Uncharacterized ORF; Puttaive NAD binding Rossmann fold oxidoreductase; transcript up-regulated in conidia exposed to neutrophils	7.15501	8.06	1	2	2	3	360	39.9447	7.03467
Afu2g15870	Afu2g15870 AspGDID:ASPL0000104304 COORDS:Chr2_A_fumigatus_Af293:4194874-4191631C, translated using codon table 1 (1039 amino acids) Uncharacterized ORF; Ortholog(s) have cytosol, nuclear envelope localization	7.11813	3.18	1	2	2	2	1039	114.292	4.65283
Afu2g03580	Afu2g03580 AspGDID:ASPL0000103185 COORDS:Chr2_A_fumigatus_Af293:953968-955580W, translated using codon table 1 (518 amino acids) Uncharacterized ORF; Ortholog(s) have phenylalanine-tRNA ligase activity, role in phenylalanyl-tRNA aminoacylation and cytosol, phenylalanine-tRNA ligase complex localization	6.95864	15.64	1	4	4	4	518	58.509	7.44482
Afu3g14540	hsp30 AspGDID:ASPL0000105843 COORDS:Chr3_A_fumigatus_Af293:3853746-3853204C, translated using codon table 1 (180 amino acids) Verified ORF; Putative 30-kilodalton heat shock protein; conidia-enriched protein; protein levels increase in response to amphotericin B and hydrogen peroxide	6.95252	18.89	1	2	2	4	180	20.4503	6.55127
Afu2g10600	Afu2g10600 AspGDID:ASPL0000103775 COORDS:Chr2_A_fumigatus_Af293:2713549-2714392W, translated using codon table 1 (242 amino acids) Verified ORF; Putative NADH dehydrogenase; mutation causes increased azole resistance	6.93995	11.98	1	2	2	2	242	27.5249	5.03369
Afu4g07190	argB AspGDID:ASPL0000106433 COORDS:Chr4_A_fumigatus_Af293:1868021-1866906C, translated using codon table 1 (371 amino acids) Verified ORF; Ornathine carbamoyltransferase, enzyme of the arginine biosynthesis pathway; hypoxia induced protein	6.81867	7.82	1	2	2	2	371	40.0877	7.89893
Afu2g14210	ilv3 AspGDID:ASPL0000104136 COORDS:Chr2_A_fumigatus_Af293:3721264-3723226W, translated using codon table 1 (606 amino acids) Verified ORF; Putative mitochondrial dihydroxy acid dehydratase; hypoxia induced protein; induced by exposure to human airway epithelial cells; required for virulence	6.78272	5.12	1	2	2	2	606	64.7161	7.6499
Afu2g09310	Afu2g09310 AspGDID:ASPL0000103649 COORDS:Chr2_A_fumigatus_Af293:2382162-2382540W, translated using codon table 1 (71 amino acids) Uncharacterized ORF; Has domain(s) with predicted proton-transporting ATP synthase activity, rotational mechanism, proton-transporting ATPase activity, rotational mechanism activity and role in ATP synthesis coupled proton transport	6.76171	30.99	1	2	2	2	71	7.85714	10.4185
Afu3g10300	Afu3g10300 AspGDID:ASPL0000105428 COORDS:Chr3_A_fumigatus_Af293:2667473-2665767C, translated using codon table 1 (524 amino acids) Uncharacterized ORF; Putative galactokinase with a role in galactose catabolism; transcript up-regulated in conidia exposed to neutrophils	6.30409	6.3	1	2	2	2	524	57.6085	6.65381
Afu4g12850	clxA AspGDID:ASPL0000106991 COORDS:Chr4_A_fumigatus_Af293:3365625-3367567W, translated using codon table 1 (563 amino acids) Verified ORF; Calnexin, ER membrane chaperone involved in folding of glycoproteins directed to the secretory pathway; hypoxia repressed; enriched in dormant conidia	5.90886	3.91	1	2	2	2	563	61.8151	5.07178
Afu5g02850	Afu5g02850 AspGDID:ASPL0000107464 COORDS:Chr5_A_fumigatus_Af293:754834-756051W, translated using codon table 1 (324 amino acids) Uncharacterized ORF; Has domain(s) with predicted arylformamidase activity and role in tryptophan catabolic process to kynurenine	5.77326	10.8	1	3	3	3	324	36.303	5.21143
Afu3g05910	Afu3g05910 AspGDID:ASPL0000105004 COORDS:Chr3_A_fumigatus_Af293:1450275-1447686C, translated using codon table 1 (835 amino acids) Uncharacterized ORF; Has domain(s) with predicted role in DNA replication-independent nucleosome assembly and HIR complex localization	5.72343	2.87	1	2	2	2	835	87.3008	9.71533
Afu2g08990	Afu2g08990 AspGDID:ASPL0000103617 COORDS:Chr2_A_fumigatus_Af293:2302751-2304016W, translated using codon table 1 (421 amino acids) Uncharacterized ORF; Ortholog(s) have GDP-dissociation inhibitor activity, GTPase activator activity, translation initiation factor binding activity and role in mature ribosome assembly, negative regulation of translational initiation	5.50026	9.26	1	2	2	2	421	46.8299	5.16064
Afu7g02020	Afu7g02020 AspGDID:ASPL0000109997 COORDS:Chr7_A_fumigatus_Af293:544081-544744W, translated using codon table 1 (105 amino acids) Uncharacterized ORF; Has domain(s) with predicted hydrolase activity, acting on acid anhydrides, catalyzing transmembrane movement of substances activity, role in proton transport and vacuolar proton-transporting V-type ATPase complex localization	5.45645	28.57	1	2	2	3	105	11.7859	5.21143
Afu2g09730	Afu2g09730 AspGDID:ASPL0000103689 COORDS:Chr2_A_fumigatus_Af293:2494100-2495262W, translated using codon table 1 (321 amino acids) Uncharacterized ORF; Has domain(s) with predicted nucleic acid binding, nucleotide binding activity	5.30818	6.85	1	2	2	3	321	34.7668	10.6382
Afu5g05680	Afu5g05680 AspGDID:ASPL0000107645 COORDS:Chr5_A_fumigatus_Af293:1322763-1324274W, translated using codon table 1 (464 amino acids) Uncharacterized ORF; Ortholog(s) have translation release factor activity, codon specific activity and role in asexual sporulation resulting in formation of a cellular spore, cellular response to nitrogen starvation, cytokinesis, translational termination	5.23176	6.03	1	2	2	2	464	51.8989	6.48096
Afu5g11040	Afu5g11040 AspGDID:ASPL0000108164 COORDS:Chr5_A_fumigatus_Af293:2828675-2829826W, translated using codon table 1 (360 amino acids) Uncharacterized ORF; Ortholog(s) have pantoate-beta-alanine ligase activity, role in pantothenate biosynthetic process and cytosol, nucleus localization	5.19526	6.39	1	2	2	2	360	39.7746	8.20654
Afu4g11910	Afu4g11910 AspGDID:ASPL0000106899 COORDS:Chr4_A_fumigatus_Af293:3145186-3142526C, translated using codon table 1 (841 amino acids) Uncharacterized ORF; Ortholog(s) have cytoplasm localization	5.17675	3.09	1	2	2	2	841	95.5556	6.97607
Afu5g08290	Afu5g08290 AspGDID:ASPL0000107901 COORDS:Chr5_A_fumigatus_Af293:2105292-2104352C, translated using codon table 1 (283 amino acids) Uncharacterized ORF; Ortholog(s) have intracellular localization	4.46054	8.48	1	3	3	3	283	31.3553	6.69775
Afu2g14270	Afu2g14270 AspGDID:ASPL0000104142 COORDS:Chr2_A_fumigatus_Af293:3742174-3739906C, translated using codon table 1 (603 amino acids) Uncharacterized ORF; Putative actin-binding protein; hypoxia repressed protein	3.95388	2.49	1	2	2	2	603	65.8585	5.61768
Afu7g01700	Afu7g01700 AspGDID:ASPL0000109965 COORDS:Chr7_A_fumigatus_Af293:455021-456680W, translated using codon table 1 (535 amino acids) Uncharacterized ORF; Ortholog of <i>A. nidulans FGSC A4</i> : AN11178, <i>A. niger CBS 513.88</i> : An12g01010, <i>A. oryzae RIB40</i> : AO090038000539, <i>Aspergillus wentii</i> : Aspwe1_0042439 and <i>Aspergillus terreus NIH2624</i> : ATET_01783	3.91727	3.74	1	2	2	2	535	60.964	9.34912
Afu4g11560	Afu4g11560 AspGDID:ASPL0000106864 COORDS:Chr4_A_fumigatus_Af293:3047353-3057034W, translated using codon table 1 (3170 amino acids) Uncharacterized ORF; Ortholog(s) have role in ascospore-type prospore membrane assembly, late endosome to vacuole transport, protein retention in Golgi apparatus, protein targeting to vacuole	3.57632	0.85	1	2	2	2	3170	357.93	5.71924
Afu6g12820	mpkB AspGDID:ASPL0000109625 COORDS:Chr6_A_fumigatus_Af293:3233954-3232650C, translated using codon table 1 (353 amino acids) Uncharacterized ORF; Putative mitogen-activated protein kinase (MAPK)	3.28278	5.38	1	2	2	2	353	40.8268	6.90283
Afu5g11380	Afu5g11380 AspGDID:ASPL0000108197 COORDS:Chr5_A_fumigatus_Af293:2924786-2923943C, translated using codon table 1 (197 amino acids) Uncharacterized ORF; Putative Rho-GDP dissociation inhibitor; transcript and protein levels increased in response to amphotericin B	3.11625	12.69	1	2	2	2	197	22.3004	5.90967
Afu5g04370	Afu5g04370 AspGDID:ASPL0000107616 COORDS:Chr5_A_fumigatus_Af293:1179535-1181640W, translated using codon table 1 (666 amino acids) Uncharacterized ORF; Putative NADH-quinone oxidoreductase, subunit G	3.04024	5.41	1	2	2	2	666	73.3247	6.16357
Afu4g10540	Afu4g10540 AspGDID:ASPL0000106768 COORDS:Chr4_A_fumigatus_Af293:2759234-2756613C, translated using codon table 1 (832 amino acids) Uncharacterized ORF; Ortholog(s) have TFIID-class transcription factor binding, chromatin binding, core promoter binding, lysine-acetylated histone binding activity	2.43517	1.68	1	2	2	2	832	91.6639	5.87158
Afu5g07020	Afu5g07020 AspGDID:ASPL0000107777 COORDS:Chr5_A_fumigatus_Af293:1738915-1740843W, translated using codon table 1 (622 amino acids) Uncharacterized ORF; Ribosome biogenesis ABC transporter	0	2.41	1	2	2	2	622	69.7026	6.65381
Afu6g13670	Afu6g13670 AspGDID:ASPL0000109708 COORDS:Chr6_A_fumigatus_Af293:3483620-3485062W, translated using codon table 1 (338 amino acids) Uncharacterized ORF; Ortholog(s) have role in cellular protein localization, endoplasmic reticulum tubular network maintenance, nuclear pore complex assembly, regulation of cytokinesis, site selection	0	7.69	1	3	3	3	338	37.7157	6.18896

## Sheet: MpkC GFP_CR 15 min
Accession	Description	Score	Coverage	# Proteins	# Unique Peptides	# Peptides	# PSMs	# AAs	MW [kDa]	calc. pI
Afu3g06550	Afu3g06550 AspGDID:ASPL0000105066 COORDS:Chr3_A_fumigatus_Af293:1623469-1625008W, translated using codon table 1 (469 amino acids) Uncharacterized ORF; Has domain(s) with predicted phosphatase activity, phosphoserine phosphatase activity and role in L-serine biosynthetic process, metabolic process	149.162	69.08	1	20	20	30	469	51.8419	5.89697
Afu5g09100	mpkC AspGDID:ASPL0000107981 COORDS:Chr5_A_fumigatus_Af293:2340794-2342470W, translated using codon table 1 (378 amino acids) Verified ORF; Putative mitogen activated protein kinase (MAPK); involved in the oxidative stress response; transcript abundance increases in response to carbon source and oxidative stress	98.6548	64.81	1	13	16	22	378	43.2801	5.75732
Afu3g10310	Afu3g10310 AspGDID:ASPL0000105429 COORDS:Chr3_A_fumigatus_Af293:2671052-2673496W, translated using codon table 1 (743 amino acids) Uncharacterized ORF; Ortholog(s) have acetolactate synthase activity, flavin adenine dinucleotide binding activity, role in isoleucine biosynthetic process, valine biosynthetic process and acetolactate synthase complex, mitochondrion localization	26.9495	16.82	1	9	9	10	743	81.4649	8.54346
Afu1g13710	Afu1g13710 AspGDID:ASPL0000102439 COORDS:Chr1_A_fumigatus_Af293:3650512-3647224C, translated using codon table 1 (1064 amino acids) Uncharacterized ORF; Isoleucyl-tRNA synthetase, cytoplasmic	23.4209	9.68	1	8	8	8	1064	122.315	6.43018
Afu4g03760	Afu4g03760 AspGDID:ASPL0000106195 COORDS:Chr4_A_fumigatus_Af293:1054642-1057888W, translated using codon table 1 (1060 amino acids) Uncharacterized ORF; Putative glycine dehydrogenase	22.385	7.92	1	8	8	8	1060	115.13	7.15186
Afu1g12940	sakA AspGDID:ASPL0000102362 COORDS:Chr1_A_fumigatus_Af293:3428181-3429807W, translated using codon table 1 (366 amino acids) Verified ORF; Putative mitogen-activated protein kinase (MAPK) with predicted roles in the osmotic and oxidative stress responses; involved in sensing nitrogen in the medium	36.0186	28.69	1	7	8	10	366	41.9334	5.60498
Afu3g10660	erg13 AspGDID:ASPL0000105464 COORDS:Chr3_A_fumigatus_Af293:2760689-2762268W, translated using codon table 1 (460 amino acids) Uncharacterized ORF; Putative hydroxymethyl glutaryl-coenzyme A synthase with a predicted role in ergosterol biosynthesis; SrbA-regulated during hypoxia	34.2163	26.96	1	7	7	7	460	50.7644	6.55127
Afu7g01860	sti1 AspGDID:ASPL0000109981 COORDS:Chr7_A_fumigatus_Af293:501500-503455W, translated using codon table 1 (581 amino acids) Verified ORF; Putative heat shock protein; protein levels increase in response to amphotericin B; transcript induced by exposure to human airway epithelial cells; induced by gliotoxin exposure	30.247	18.24	1	7	7	8	581	64.2614	5.57959
Afu7g05370	aspB AspGDID:ASPL0000110230 COORDS:Chr7_A_fumigatus_Af293:1290537-1292385W, translated using codon table 1 (463 amino acids) Verified ORF; Putative septin; Yap1-dependent induction in response to hydrogen peroxide; localizes to septa and to rings at the base of developing phialides; hypoxia repressed protein	24.2082	19.44	1	6	7	7	463	52.5207	6.97607
Afu1g15450	Afu1g15450 AspGDID:ASPL0000102610 COORDS:Chr1_A_fumigatus_Af293:4172637-4171167C, translated using codon table 1 (424 amino acids) Uncharacterized ORF; Ortholog(s) have adenylosuccinate synthase activity, sulfinylpropanyl adenylate synthase activity	21.9835	19.58	1	6	6	7	424	46.6189	6.90283
Afu6g02910	argEF AspGDID:ASPL0000108747 COORDS:Chr6_A_fumigatus_Af293:603327-600472C, translated using codon table 1 (906 amino acids) Verified ORF; Mitochondrial bifunctional enzyme with N-acetyl-gamma-glutamyl-phosphate reductase and acetylglutamate kinase activity, catalyzes the second and third step in arginine biosynthesis	17.5117	7.73	1	6	6	6	906	99.3845	8.14795
Afu7g03980	Afu7g03980 AspGDID:ASPL0000110093 COORDS:Chr7_A_fumigatus_Af293:893752-895260W, translated using codon table 1 (468 amino acids) Uncharacterized ORF; Ortholog(s) have role in translational initiation and cytosol, eukaryotic 43S preinitiation complex, eukaryotic translation initiation factor 3 complex, eIF3m, nucleus localization	15.5631	17.31	1	6	6	6	468	51.0816	5.05908
Afu1g02980	Afu1g02980 AspGDID:ASPL0000101468 COORDS:Chr1_A_fumigatus_Af293:854826-855623W, translated using codon table 1 (265 amino acids) Uncharacterized ORF; Putative 6-phosphogluconolactonase; calcium downregulated	18.7749	25.28	1	5	5	5	265	28.8198	6.27783
Afu2g13720	Afu2g13720 AspGDID:ASPL0000104087 COORDS:Chr2_A_fumigatus_Af293:3562458-3563730W, translated using codon table 1 (374 amino acids) Uncharacterized ORF; Ortholog(s) have RNA polymerase I activity, RNA polymerase III activity	18.7506	28.61	1	5	5	5	374	42.3207	6.55127
Afu8g05440	atp4 AspGDID:ASPL0000110874 COORDS:Chr8_A_fumigatus_Af293:1265282-1266290W, translated using codon table 1 (274 amino acids) Uncharacterized ORF; Mitochondrial ATPase subunit; hypoxia repressed protein	17.8752	25.55	1	5	5	5	274	29.7087	9.34912
Afu6g08750	Afu6g08750 AspGDID:ASPL0000109231 COORDS:Chr6_A_fumigatus_Af293:2073566-2071674C, translated using codon table 1 (578 amino acids) Uncharacterized ORF; Ortholog(s) have role in hyphal growth and cytosol, mitochondrion localization	17.4142	14.36	1	5	5	5	578	62.9819	8.17725
Afu6g07940	Afu6g07940 AspGDID:ASPL0000109154 COORDS:Chr6_A_fumigatus_Af293:1837939-1839097W, translated using codon table 1 (318 amino acids) Uncharacterized ORF; Putative lactoylglutathione lyase	16.4801	29.87	1	5	5	5	318	36.5071	6.39209
Afu6g10470	zpr1 AspGDID:ASPL0000109402 COORDS:Chr6_A_fumigatus_Af293:2596608-2598107W, translated using codon table 1 (475 amino acids) Uncharacterized ORF; Putative zinc finger protein; transcript highly induced during conidial germination	14.6496	13.47	1	5	5	5	475	53.5291	4.66553
Afu1g11480	Afu1g11480 AspGDID:ASPL0000102211 COORDS:Chr1_A_fumigatus_Af293:3031787-3030921C, translated using codon table 1 (168 amino acids) Uncharacterized ORF; Protein of unknown function; transcript up-regulated in conidia exposed to neutrophils	13.4072	39.88	1	5	5	5	168	18.216	5.52881
Afu5g10640	Afu5g10640 AspGDID:ASPL0000108128 COORDS:Chr5_A_fumigatus_Af293:2721762-2723271W, translated using codon table 1 (391 amino acids) Uncharacterized ORF; Ortholog(s) have tyrosine-tRNA ligase activity, role in tyrosyl-tRNA aminoacylation and cytosol, nucleus localization	11.2763	12.79	1	5	5	5	391	43.5878	6.58057
Afu7g04070	Afu7g04070 AspGDID:ASPL0000110102 COORDS:Chr7_A_fumigatus_Af293:916318-915016C, translated using codon table 1 (369 amino acids) Uncharacterized ORF; Ortholog(s) have 3-deoxy-7-phosphoheptulonate synthase activity, role in aromatic amino acid family biosynthetic process and cytoplasm, nucleus localization	19.0322	20.6	1	4	4	4	369	40.0468	6.7417
Afu6g04970	Afu6g04970 AspGDID:ASPL0000108951 COORDS:Chr6_A_fumigatus_Af293:1181194-1182540W, translated using codon table 1 (428 amino acids) Uncharacterized ORF; Ortholog(s) have O-phospho-L-serine:2-oxoglutarate aminotransferase activity, role in L-serine biosynthetic process, purine nucleobase biosynthetic process and cytosol localization	16.4685	16.12	1	4	4	4	428	46.8644	6.81494
Afu1g00460	Afu1g00460 AspGDID:ASPL0000101218 COORDS:Chr1_A_fumigatus_Af293:146969-145247C, translated using codon table 1 (507 amino acids) Uncharacterized ORF; Ortholog(s) have intracellular localization	16.466	11.05	1	4	4	5	507	55.8111	6.15088
Afu1g09010	Afu1g09010 AspGDID:ASPL0000101967 COORDS:Chr1_A_fumigatus_Af293:2333751-2335765W, translated using codon table 1 (651 amino acids) Uncharacterized ORF; Ortholog(s) have cytosol localization	15.4235	10.14	1	4	4	4	651	72.8652	7.06396
Afu2g12400	Afu2g12400 AspGDID:ASPL0000103954 COORDS:Chr2_A_fumigatus_Af293:3185304-3186292W, translated using codon table 1 (227 amino acids) Uncharacterized ORF; Putative ATP synthase oligomycin sensitivity conferral protein	15.2448	18.06	1	4	4	4	227	24.3742	9.64209
Afu2g15940	Afu2g15940 AspGDID:ASPL0000104311 COORDS:Chr2_A_fumigatus_Af293:4216706-4215369C, translated using codon table 1 (445 amino acids) Uncharacterized ORF; Cofactor for methionyl-and glutamyl-tRNA synthetases	14.4025	16.4	1	4	4	4	445	47.4928	6.96143
Afu3g06530	sC AspGDID:ASPL0000105064 COORDS:Chr3_A_fumigatus_Af293:1618981-1616721C, translated using codon table 1 (574 amino acids) Uncharacterized ORF; Putative ATP sulfurylase; sulfate adenylyltransferase; reacts with rabbit immunosera exposed to A. fumigatus conidia; hypoxia repressed protein	13.9416	9.41	1	4	4	4	574	64.2932	7.06396
Afu5g10560	Afu5g10560 AspGDID:ASPL0000108120 COORDS:Chr5_A_fumigatus_Af293:2704203-2703448C, translated using codon table 1 (196 amino acids) Uncharacterized ORF; Cytochrome c oxidase subunit V	13.3566	25	1	4	4	4	196	22.1855	9.94971
Afu3g08980	Afu3g08980 AspGDID:ASPL0000105299 COORDS:Chr3_A_fumigatus_Af293:2294770-2296443W, translated using codon table 1 (536 amino acids) Uncharacterized ORF; Ortholog(s) have threonine synthase activity, role in threonine biosynthetic process and cytosol, nucleus localization	12.8826	12.5	1	4	4	4	536	59.2332	6.20166
Afu5g03690	Afu5g03690 AspGDID:ASPL0000107547 COORDS:Chr5_A_fumigatus_Af293:987794-986454C, translated using codon table 1 (424 amino acids) Uncharacterized ORF; Ortholog(s) have phosphatidylinositol transporter activity	12.8689	13.92	1	4	4	5	424	46.141	4.84326
Afu6g03460	Afu6g03460 AspGDID:ASPL0000108801 COORDS:Chr6_A_fumigatus_Af293:741171-742895W, translated using codon table 1 (574 amino acids) Uncharacterized ORF; Has domain(s) with predicted ATP binding activity	12.6055	9.93	1	4	4	4	574	63.4223	6.13818
Afu2g09850	Afu2g09850 AspGDID:ASPL0000103701 COORDS:Chr2_A_fumigatus_Af293:2516744-2518045W, translated using codon table 1 (355 amino acids) Uncharacterized ORF; Putative oxidoreductase, 2-nitropropane dioxygenase family; transcript up-regulated in conidia exposed to neutrophils	12.2195	14.08	1	4	4	4	355	37.6787	7.02002
Afu3g13870	nsdD AspGDID:ASPL0000105780 COORDS:Chr3_A_fumigatus_Af293:3674484-3676292W, translated using codon table 1 (493 amino acids) Verified ORF; Putative GATA-type transcriptional activator; required during an early stage of mating; plays a role in resistance toward cell wall stress	12.0589	12.78	1	4	4	4	493	52.9912	9.26123
Afu4g03630	erg6 AspGDID:ASPL0000106182 COORDS:Chr4_A_fumigatus_Af293:1025739-1024484C, translated using codon table 1 (377 amino acids) Uncharacterized ORF; Putative sterol 24-C-methyltransferase with a predicted role in ergosterol biosynthesis; transcript downregulated in response to amphotericin B; induced by exposure to artemisinin; SrbA-regulated during hypoxia	10.773	11.94	1	4	4	4	377	42.5439	6.43018
Afu1g15000	Afu1g15000 AspGDID:ASPL0000102567 COORDS:Chr1_A_fumigatus_Af293:4029547-4031693W, translated using codon table 1 (643 amino acids) Uncharacterized ORF; Putative isopropylmalate synthase; transcript highly induced during conidial germination; SrbA-regulated during hypoxia	10.2601	7	1	4	4	4	643	71.1504	5.68115
Afu6g03540	acuE AspGDID:ASPL0000108809 COORDS:Chr6_A_fumigatus_Af293:768975-770805W, translated using codon table 1 (539 amino acids) Verified ORF; Putative malate synthase; protein abundant in conidia	9.90509	8.72	1	4	4	4	539	61.0212	8.11865
Afu3g14540	hsp30 AspGDID:ASPL0000105843 COORDS:Chr3_A_fumigatus_Af293:3853746-3853204C, translated using codon table 1 (180 amino acids) Verified ORF; Putative 30-kilodalton heat shock protein; conidia-enriched protein; protein levels increase in response to amphotericin B and hydrogen peroxide	9.5537	24.44	1	4	4	4	180	20.4503	6.55127
Afu5g04370	Afu5g04370 AspGDID:ASPL0000107616 COORDS:Chr5_A_fumigatus_Af293:1179535-1181640W, translated using codon table 1 (666 amino acids) Uncharacterized ORF; Putative NADH-quinone oxidoreductase, subunit G	9.32725	9.46	1	4	4	4	666	73.3247	6.16357
Afu3g01580	Afu3g01580 AspGDID:ASPL0000104678 COORDS:Chr3_A_fumigatus_Af293:397771-395356C, translated using codon table 1 (646 amino acids) Uncharacterized ORF; Putative glucose-methanol-choline (GMC) oxidoreductase; protein induced by hydrogen peroxide; hypoxia induced protein; repressed by gliotoxin exposure	8.82186	6.81	1	4	4	4	646	72.1047	7.41553
Afu5g11380	Afu5g11380 AspGDID:ASPL0000108197 COORDS:Chr5_A_fumigatus_Af293:2924786-2923943C, translated using codon table 1 (197 amino acids) Uncharacterized ORF; Putative Rho-GDP dissociation inhibitor; transcript and protein levels increased in response to amphotericin B	8.56089	30.46	1	4	4	4	197	22.3004	5.90967
Afu3g06260	Afu3g06260 AspGDID:ASPL0000105037 COORDS:Chr3_A_fumigatus_Af293:1548887-1549628W, translated using codon table 1 (114 amino acids) Uncharacterized ORF; Ortholog(s) have translation initiation factor binding activity and cytosol, multi-eIF complex, nucleus localization	8.40843	37.72	1	4	4	4	114	13.0458	8.60205
Afu5g09400	Afu5g09400 AspGDID:ASPL0000108009 COORDS:Chr5_A_fumigatus_Af293:2418391-2419402W, translated using codon table 1 (294 amino acids) Uncharacterized ORF; Putative carbonyl reductase; transcript up-regulated in conidia exposed to neutrophils	6.8983	13.95	1	4	4	5	294	31.4496	6.30322
Afu3g11170	Afu3g11170 AspGDID:ASPL0000105515 COORDS:Chr3_A_fumigatus_Af293:2928974-2931529W, translated using codon table 1 (759 amino acids) Uncharacterized ORF; Ortholog(s) have sequence-specific DNA binding activity and role in carotenoid biosynthetic process, circadian rhythm, conidiophore development	5.97893	6.59	1	4	4	4	759	84.1513	6.7124
Afu3g13480	Afu3g13480 AspGDID:ASPL0000105743 COORDS:Chr3_A_fumigatus_Af293:3565478-3566600W, translated using codon table 1 (308 amino acids) Uncharacterized ORF; Translation initiation factor 2 alpha subunit	4.4665	14.61	1	4	4	4	308	35.014	5.8208
Afu7g00250	tub2 AspGDID:ASPL0000109824 COORDS:Chr7_A_fumigatus_Af293:70221-71948W, translated using codon table 1 (448 amino acids) Uncharacterized ORF; Tubulin beta-2 subunit; predicted gene pair with AFUA_1G10910 (tubA)	20.3925	16.96	1	3	4	4	448	49.8598	4.98291
Afu5g07120	Afu5g07120 AspGDID:ASPL0000107787 COORDS:Chr5_A_fumigatus_Af293:1769812-1771261W, translated using codon table 1 (352 amino acids) Uncharacterized ORF; RNP domain protein; reacts with rabbit immunosera exposed to A. fumigatus conidia	20.2468	19.89	1	3	3	3	352	37.116	9.15869
Afu5g02750	Afu5g02750 AspGDID:ASPL0000107455 COORDS:Chr5_A_fumigatus_Af293:720857-719993C, translated using codon table 1 (158 amino acids) Uncharacterized ORF; Cytochrome c oxidase subunit Va with a predicted role in oxidative phosphorylation; induced by exposure to artemisinin	19.929	28.48	1	3	3	5	158	17.9802	5.68115
Afu2g07420	sac6 AspGDID:ASPL0000103465 COORDS:Chr2_A_fumigatus_Af293:1889973-1887748C, translated using codon table 1 (646 amino acids) Verified ORF; Putative actin-bundling protein, fimbrin; conidia-enriched protein	17.9285	7.74	1	3	3	4	646	72.4336	6.12549
Afu5g02370	Afu5g02370 AspGDID:ASPL0000107417 COORDS:Chr5_A_fumigatus_Af293:611752-609421C, translated using codon table 1 (686 amino acids) Uncharacterized ORF; Vacuolar ATP synthase catalytic subunit A; hypoxia induced protein; putative essential gene; induced by exposure to human airway epithelial cells	16.4628	10.79	1	3	3	3	686	74.865	6.18896
Afu2g11475	Afu2g11475 AspGDID:ASPL0000363557 COORDS:Chr2_A_fumigatus_Af293:2956635-2957821W, translated using codon table 1 (305 amino acids) Uncharacterized ORF; Ortholog(s) have role in endocytosis, establishment or maintenance of actin cytoskeleton polarity, vacuole organization and integral component of Golgi membrane localization	14.1869	17.38	1	3	3	3	305	33.5423	5.2749
Afu5g07890	Afu5g07890 AspGDID:ASPL0000107861 COORDS:Chr5_A_fumigatus_Af293:1979250-1978604C, translated using codon table 1 (149 amino acids) Uncharacterized ORF; Putative single-stranded DNA binding protein family member	12.2341	27.52	1	3	3	4	149	16.2432	9.68604
Afu5g07300	Afu5g07300 AspGDID:ASPL0000107804 COORDS:Chr5_A_fumigatus_Af293:1814759-1815768W, translated using codon table 1 (260 amino acids) Uncharacterized ORF; Electron transfer flavoprotein, beta subunit	12.2049	16.54	1	3	3	3	260	28.2232	8.96826
Afu5g07050	Afu5g07050 AspGDID:ASPL0000107780 COORDS:Chr5_A_fumigatus_Af293:1745205-1746800W, translated using codon table 1 (463 amino acids) Uncharacterized ORF; Proteasome regulatory particle subunit; transcript induced by exposure to human airway epithelial cells	12.0401	10.8	1	3	3	3	463	51.4175	5.75732
Afu2g01040	Afu2g01040 AspGDID:ASPL0000102935 COORDS:Chr2_A_fumigatus_Af293:239825-238336C, translated using codon table 1 (379 amino acids) Uncharacterized ORF; Putative formaldehyde dehydrogenase; transcript up-regulated in conidia exposed to neutrophils	11.5506	15.3	1	3	3	3	379	40.0182	7.26904
Afu3g12100	Afu3g12100 AspGDID:ASPL0000105606 COORDS:Chr3_A_fumigatus_Af293:3178707-3181079W, translated using codon table 1 (694 amino acids) Uncharacterized ORF; Putative trehalase phosphorylase with a predicted role in the glucose-1-phosphate pathway	11.5002	6.92	1	3	3	3	694	78.2557	6.1001
Afu3g07680	Afu3g07680 AspGDID:ASPL0000105174 COORDS:Chr3_A_fumigatus_Af293:1941416-1940148C, translated using codon table 1 (422 amino acids) Uncharacterized ORF; Putative ran GTPase activating protein	11.2151	12.09	1	3	3	3	422	46.1998	4.67822
Afu5g02850	Afu5g02850 AspGDID:ASPL0000107464 COORDS:Chr5_A_fumigatus_Af293:754834-756051W, translated using codon table 1 (324 amino acids) Uncharacterized ORF; Has domain(s) with predicted arylformamidase activity and role in tryptophan catabolic process to kynurenine	11.1625	11.42	1	3	3	4	324	36.303	5.21143
Afu3g13820	Afu3g13820 AspGDID:ASPL0000105775 COORDS:Chr3_A_fumigatus_Af293:3651038-3650223C, translated using codon table 1 (201 amino acids) Uncharacterized ORF; Putative HET-C2 protein; transcript induced by exposure to human airway epithelial cells	10.9031	16.92	1	3	3	3	201	22.1986	6.94678
Afu3g11390	Afu3g11390 AspGDID:ASPL0000105537 COORDS:Chr3_A_fumigatus_Af293:2988245-2989876W, translated using codon table 1 (465 amino acids) Uncharacterized ORF; Ortholog(s) have role in positive regulation of RNA polymerase II transcriptional preinitiation complex assembly, proteasome regulatory particle assembly, ubiquitin-dependent protein catabolic process	10.2905	8.6	1	3	3	3	465	51.5677	5.30029
Afu6g07540	Afu6g07540 AspGDID:ASPL0000109114 COORDS:Chr6_A_fumigatus_Af293:1715811-1713540C, translated using codon table 1 (548 amino acids) Uncharacterized ORF; Ortholog(s) have chaperonin-containing T-complex localization	10.0214	6.2	1	3	3	3	548	59.8493	5.51611
Afu1g15960	Afu1g15960 AspGDID:ASPL0000102659 COORDS:Chr1_A_fumigatus_Af293:4331468-4333260W, translated using codon table 1 (554 amino acids) Uncharacterized ORF; Ortholog(s) have flavin adenine dinucleotide binding, glutathione transferase activity, glutathione-disulfide reductase activity	9.91569	8.66	1	3	3	3	554	60.0714	8.70459
Afu7g02020	Afu7g02020 AspGDID:ASPL0000109997 COORDS:Chr7_A_fumigatus_Af293:544081-544744W, translated using codon table 1 (105 amino acids) Uncharacterized ORF; Has domain(s) with predicted hydrolase activity, acting on acid anhydrides, catalyzing transmembrane movement of substances activity, role in proton transport and vacuolar proton-transporting V-type ATPase complex localization	9.88797	28.57	1	3	3	4	105	11.7859	5.21143
Afu5g12260	tigA AspGDID:ASPL0000108282 COORDS:Chr5_A_fumigatus_Af293:3183118-3184297W, translated using codon table 1 (368 amino acids) Uncharacterized ORF; Putative disulfide isomerase	9.79248	12.5	1	3	3	3	368	40.2289	6.44287
Afu2g01920	Afu2g01920 AspGDID:ASPL0000103022 COORDS:Chr2_A_fumigatus_Af293:479695-481689W, translated using codon table 1 (664 amino acids) Uncharacterized ORF; Ortholog(s) have cytosol localization	9.5848	6.78	1	3	3	3	664	74.2475	7.1958
Afu1g09330	Afu1g09330 AspGDID:ASPL0000101999 COORDS:Chr1_A_fumigatus_Af293:2420356-2421522W, translated using codon table 1 (345 amino acids) Uncharacterized ORF; Ortholog(s) have sequence-specific DNA binding activity and role in translational initiation	9.56528	9.86	1	3	3	3	345	37.1759	4.88135
Afu6g03810	Afu6g03810 AspGDID:ASPL0000108836 COORDS:Chr6_A_fumigatus_Af293:840093-839212C, translated using codon table 1 (255 amino acids) Uncharacterized ORF; Putative mitochondrial ATP synthase D chain; hypoxia induced protein	8.80444	13.73	1	3	3	3	255	28.6782	9.0415
Afu1g09840	tim44 AspGDID:ASPL0000102050 COORDS:Chr1_A_fumigatus_Af293:2554479-2552871C, translated using codon table 1 (515 amino acids) Uncharacterized ORF; Mitochondrial inner membrane translocase subunit	8.10206	7.96	1	3	3	3	515	57.7095	9.11475
Afu4g06690	Afu4g06690 AspGDID:ASPL0000106383 COORDS:Chr4_A_fumigatus_Af293:1733950-1731132C, translated using codon table 1 (859 amino acids) Uncharacterized ORF; Ortholog(s) have nucleotide binding, ribonucleoside-diphosphate reductase activity, thioredoxin disulfide as acceptor activity	3.47242	5.01	1	3	3	3	859	96.0463	6.66846
Afu3g14370	Afu3g14370 AspGDID:ASPL0000105827 COORDS:Chr3_A_fumigatus_Af293:3811987-3816428W, translated using codon table 1 (1453 amino acids) Uncharacterized ORF; Ortholog(s) have cytoplasm localization	1.85422	2.27	1	3	3	3	1453	162.524	8.5874
Afu1g13740	Afu1g13740 AspGDID:ASPL0000102442 COORDS:Chr1_A_fumigatus_Af293:3658931-3663766W, translated using codon table 1 (1578 amino acids) Uncharacterized ORF; Predicted pentafunctional polypeptide; predicted essential gene	1.71895	2.34	1	3	3	3	1578	171.364	6.68311
Afu4g12870	Afu4g12870 AspGDID:ASPL0000106993 COORDS:Chr4_A_fumigatus_Af293:3368445-3370387W, translated using codon table 1 (602 amino acids) Uncharacterized ORF; Putative methylmalonate-semialdehyde dehydrogenase; transcript up-regulated in conidia exposed to neutrophils	13.6909	3.49	1	2	2	3	602	63.8246	8.03076
Afu5g12570	Afu5g12570 AspGDID:ASPL0000108311 COORDS:Chr5_A_fumigatus_Af293:3257995-3258330W, translated using codon table 1 (83 amino acids) Uncharacterized ORF; Ortholog(s) have RNA binding activity, role in mRNA splicing, via spliceosome and U4/U6 x U5 tri-snRNP complex, U6 snRNP, cytoplasm, nucleolus, small nucleolar ribonucleoprotein complex localization	13.4394	51.81	1	2	2	2	83	9.3466	4.37354
Afu6g13330	Afu6g13330 AspGDID:ASPL0000109674 COORDS:Chr6_A_fumigatus_Af293:3382648-3383137W, translated using codon table 1 (112 amino acids) Verified ORF; Putative RNA binding protein of unknown function; conidia-enriched protein; transcript up-regulated in conidia exposed to neutrophils	11.8069	37.5	1	2	2	2	112	12.4831	6.15088
Afu1g11690	Afu1g11690 AspGDID:ASPL0000102233 COORDS:Chr1_A_fumigatus_Af293:3078136-3076712C, translated using codon table 1 (455 amino acids) Uncharacterized ORF; Ortholog(s) have role in actin cortical patch assembly, actin nucleation, positive regulation of actin nucleation and actin cortical patch, cytosol, medial cortex, nucleus, old growing cell tip localization	9.45383	10.77	1	2	2	2	455	44.9764	11.4438
Afu5g05500	Afu5g05500 AspGDID:ASPL0000107629 COORDS:Chr5_A_fumigatus_Af293:1277444-1278887W, translated using codon table 1 (424 amino acids) Uncharacterized ORF; Ortholog(s) have phosphoglycerate dehydrogenase activity, role in serine family amino acid biosynthetic process and cytosol localization	7.94326	7.78	1	2	2	2	424	45.8868	7.00537
Afu6g04010	Afu6g04010 AspGDID:ASPL0000108856 COORDS:Chr6_A_fumigatus_Af293:901498-904822W, translated using codon table 1 (962 amino acids) Uncharacterized ORF; Ortholog(s) have importin-alpha export receptor activity, role in cell division, protein export from nucleus and nuclear membrane localization	7.4685	2.91	1	2	2	2	962	108.421	5.37646
Afu3g11640	Afu3g11640 AspGDID:ASPL0000105562 COORDS:Chr3_A_fumigatus_Af293:3058607-3059789W, translated using codon table 1 (368 amino acids) Uncharacterized ORF; Homoserine dehydrogenase; no human homolog	7.31895	8.42	1	2	2	2	368	38.4803	5.87158
Afu3g12270	Afu3g12270 AspGDID:ASPL0000105623 COORDS:Chr3_A_fumigatus_Af293:3237221-3238007W, translated using codon table 1 (235 amino acids) Uncharacterized ORF; Putative glutathione peroxidase; peroxiredoxin; transcript upregulated in hyphae exposed to neutrophils	7.13322	11.49	1	2	2	2	235	25.7393	9.21729
Afu2g04010	tpsB AspGDID:ASPL0000103227 COORDS:Chr2_A_fumigatus_Af293:1094679-1092973C, translated using codon table 1 (479 amino acids) Verified ORF; Putative trehalose-6-phosphate synthase; role in trehalose biosynthesis; expression up during heat shock; hypervirulent in combination with tpsA mutation, in a mouse model of pulmonary infection; predicted gene pair with AFUA_6G12950	7.12013	5.22	2	2	2	2	479	53.7666	7.43018
Afu1g15860	Afu1g15860 AspGDID:ASPL0000102649 COORDS:Chr1_A_fumigatus_Af293:4290367-4288413C, translated using codon table 1 (591 amino acids) Uncharacterized ORF; Has domain(s) with predicted role in intracellular protein transport, retrograde vesicle-mediated transport, Golgi to ER, transport, vesicle-mediated transport and COPI vesicle coat, clathrin adaptor complex localization	6.85939	5.25	1	2	2	2	591	65.3323	5.87158
Afu6g10060	Afu6g10060 AspGDID:ASPL0000109362 COORDS:Chr6_A_fumigatus_Af293:2481374-2482598W, translated using codon table 1 (276 amino acids) Uncharacterized ORF; Ortholog(s) have actin filament binding activity and role in actin cytoskeleton organization, barbed-end actin filament capping, cellular protein localization, mitotic cytokinesis, regulation of cell shape	6.84895	9.78	1	2	2	2	276	30.4033	5.85889
Afu5g10610	rip1 AspGDID:ASPL0000108125 COORDS:Chr5_A_fumigatus_Af293:2715644-2714448C, translated using codon table 1 (298 amino acids) Uncharacterized ORF; Ubiquinol-cytochrome c reductase iron-sulphur subunit precursor with a predicted role in oxidative phosphorylation; hypoxia induced protein; induced by exposure to artemisinin; SrbA-regulated during hypoxia	6.67425	12.08	1	2	2	2	298	32.5887	8.95361
Afu1g02070	Afu1g02070 AspGDID:ASPL0000101377 COORDS:Chr1_A_fumigatus_Af293:611102-612423W, translated using codon table 1 (319 amino acids) Uncharacterized ORF; Cytochrome C1	6.56432	9.09	1	2	2	2	319	35.1036	8.22119
Afu5g05820	Afu5g05820 AspGDID:ASPL0000107659 COORDS:Chr5_A_fumigatus_Af293:1354916-1353658C, translated using codon table 1 (355 amino acids) Uncharacterized ORF; Ortholog(s) have homoserine kinase activity, role in homoserine metabolic process, threonine biosynthetic process and cytoplasm localization	6.56402	8.45	1	2	2	2	355	38.4901	6.7417
Afu1g09970	Afu1g09970 AspGDID:ASPL0000102063 COORDS:Chr1_A_fumigatus_Af293:2578608-2579924W, translated using codon table 1 (365 amino acids) Uncharacterized ORF; Ortholog(s) have role in ascospore formation, cellular response to cadmium ion, detoxification of cadmium ion	6.55837	9.86	1	2	2	2	365	40.9887	6.3667
Afu1g09470	Afu1g09470 AspGDID:ASPL0000102013 COORDS:Chr1_A_fumigatus_Af293:2448655-2447399C, translated using codon table 1 (386 amino acids) Uncharacterized ORF; Putative class V aminotransferase; transcript up-regulated in conidia exposed to neutrophils	6.41158	6.99	1	2	2	2	386	41.8237	6.96143
Afu4g06900	Afu4g06900 AspGDID:ASPL0000106404 COORDS:Chr4_A_fumigatus_Af293:1787004-1789272W, translated using codon table 1 (573 amino acids) Uncharacterized ORF; Ortholog(s) have asparagine synthase (glutamine-hydrolyzing) activity, role in asparagine biosynthetic process and cytosol, nucleus localization	5.98445	5.41	1	2	2	2	573	64.6714	6.29053
Afu5g11040	Afu5g11040 AspGDID:ASPL0000108164 COORDS:Chr5_A_fumigatus_Af293:2828675-2829826W, translated using codon table 1 (360 amino acids) Uncharacterized ORF; Ortholog(s) have pantoate-beta-alanine ligase activity, role in pantothenate biosynthetic process and cytosol, nucleus localization	5.94455	6.39	1	2	2	2	360	39.7746	8.20654
Afu2g09870	tif35 AspGDID:ASPL0000103703 COORDS:Chr2_A_fumigatus_Af293:2523373-2524473W, translated using codon table 1 (290 amino acids) Uncharacterized ORF; Eukaryotic translation initiation factor 3 subunit G	5.94215	8.28	1	2	2	2	290	31.8511	8.79248
Afu2g03580	Afu2g03580 AspGDID:ASPL0000103185 COORDS:Chr2_A_fumigatus_Af293:953968-955580W, translated using codon table 1 (518 amino acids) Uncharacterized ORF; Ortholog(s) have phenylalanine-tRNA ligase activity, role in phenylalanyl-tRNA aminoacylation and cytosol, phenylalanine-tRNA ligase complex localization	5.92832	5.21	1	2	2	2	518	58.509	7.44482
Afu3g10360	Afu3g10360 AspGDID:ASPL0000105434 COORDS:Chr3_A_fumigatus_Af293:2688254-2685337C, translated using codon table 1 (878 amino acids) Uncharacterized ORF; Ortholog(s) have protein transporter activity and role in ascospore formation, intracellular protein transport, protein retention in Golgi apparatus, retrograde transport, endosome to Golgi	5.86981	3.3	1	2	2	2	878	99.6631	5.96045
Afu5g10650	Afu5g10650 AspGDID:ASPL0000108129 COORDS:Chr5_A_fumigatus_Af293:2725117-2723747C, translated using codon table 1 (412 amino acids) Uncharacterized ORF; Has domain(s) with predicted FMN binding, oxidoreductase activity, oxidoreductase activity, acting on the CH-NH2 group of donors, pyridoxamine-phosphate oxidase activity	5.81767	6.55	1	2	2	2	412	45.9339	6.25244
Afu4g14380	Afu4g14380 AspGDID:ASPL0000107143 COORDS:Chr4_A_fumigatus_Af293:3803235-3802361C, translated using codon table 1 (266 amino acids) Verified ORF; Protein of unknown function; transcript downregulated in response to voriconazole	5.74179	9.77	1	2	2	2	266	29.9935	7.86963
Afu2g03140	Afu2g03140 AspGDID:ASPL0000103143 COORDS:Chr2_A_fumigatus_Af293:823665-822897C, translated using codon table 1 (211 amino acids) Uncharacterized ORF; Ortholog(s) have peptide-methionine (S)-S-oxide reductase activity, role in cellular response to hydrogen peroxide and cytosol, nucleus localization	5.63303	12.32	1	2	2	2	211	23.5745	7.1958
AfuMt00120	AfuMt00120 AspGDID:ASPL0000366358 COORDS:mito_A_fumigatus_Af293:25862-26623W, translated using codon table 4 (253 amino acids) Uncharacterized ORF; Ortholog(s) have cytochrome-c oxidase activity, role in aerobic respiration, mitochondrial electron transport, cytochrome c to oxygen and mitochondrial respiratory chain complex IV localization	5.50914	10.67	1	2	2	2	253	28.9926	4.76709
Afu5g12890	Afu5g12890 AspGDID:ASPL0000108343 COORDS:Chr5_A_fumigatus_Af293:3381478-3379940C, translated using codon table 1 (512 amino acids) Uncharacterized ORF; Ortholog of <i>A. nidulans FGSC A4</i> : AN6826, <i>A. niger CBS 513.88</i> : An14g06450, <i>A. oryzae RIB40</i> : AO090120000402, <i>Aspergillus wentii</i> : Aspwe1_0058891 and <i>Aspergillus sydowii</i> : Aspsy1_0143996	5.41225	4.1	1	2	2	2	512	59.9216	5.35107
Afu5g13865	Afu5g13865 AspGDID:ASPL0000408407 COORDS:Chr5_A_fumigatus_Af293:3639676-3637668C, translated using codon table 1 (252 amino acids) Uncharacterized ORF; Ortholog(s) have ATP-dependent RNA helicase inhibitor activity, RNA binding activity	5.36625	10.71	1	2	2	2	252	26.1878	10.3452
Afu6g08300	Afu6g08300 AspGDID:ASPL0000109187 COORDS:Chr6_A_fumigatus_Af293:1940980-1944815W, translated using codon table 1 (1235 amino acids) Uncharacterized ORF; Ortholog(s) have role in regulation of circadian rhythm	5.34332	2.43	1	2	2	2	1235	138.512	8.92432
Afu5g05680	Afu5g05680 AspGDID:ASPL0000107645 COORDS:Chr5_A_fumigatus_Af293:1322763-1324274W, translated using codon table 1 (464 amino acids) Uncharacterized ORF; Ortholog(s) have translation release factor activity, codon specific activity and role in asexual sporulation resulting in formation of a cellular spore, cellular response to nitrogen starvation, cytokinesis, translational termination	5.29102	4.74	1	2	2	2	464	51.8989	6.48096
Afu4g03650	Afu4g03650 AspGDID:ASPL0000106184 COORDS:Chr4_A_fumigatus_Af293:1028974-1030431W, translated using codon table 1 (446 amino acids) Uncharacterized ORF; Ribosome associated DnaJ chaperone Zuotin	5.14723	5.16	1	2	2	2	446	51.2243	8.19189
Afu2g03590	Afu2g03590 AspGDID:ASPL0000103186 COORDS:Chr2_A_fumigatus_Af293:956883-956337C, translated using codon table 1 (88 amino acids) Uncharacterized ORF; Putative ribosomal protein S21e; transcript induced by exposure to human airway epithelial cells	4.71254	19.32	1	2	2	2	88	10.0029	8.30908
Afu3g12460	Afu3g12460 AspGDID:ASPL0000105642 COORDS:Chr3_A_fumigatus_Af293:3290265-3291746W, translated using codon table 1 (493 amino acids) Uncharacterized ORF; Ortholog of <i>A. nidulans FGSC A4</i> : AN11707, <i>A. niger CBS 513.88</i> : An02g08400, <i>A. oryzae RIB40</i> : AO090005000723, <i>Neosartorya fischeri NRRL 181</i> : NFIA_064840 and <i>Aspergillus wentii</i> : Aspwe1_0371733	4.49512	5.27	1	2	2	2	493	53.284	9.93506
Afu8g04810	Afu8g04810 AspGDID:ASPL0000110815 COORDS:Chr8_A_fumigatus_Af293:1104248-1103015C, translated using codon table 1 (336 amino acids) Uncharacterized ORF; Ortholog(s) have role in circadian regulation of gene expression, conidium formation, establishment or maintenance of bipolar cell polarity regulating cell shape and protein phosphorylation, <a href="#GOsection">more</a>	4.34897	5.95	1	2	2	2	336	39.5131	7.31299
Afu6g12770	Afu6g12770 AspGDID:ASPL0000109620 COORDS:Chr6_A_fumigatus_Af293:3226794-3225505C, translated using codon table 1 (381 amino acids) Uncharacterized ORF; Ortholog of <i>A. nidulans FGSC A4</i> : AN3716, <i>A. niger CBS 513.88</i> : An08g10710, <i>A. oryzae RIB40</i> : AO090003000397, <i>Aspergillus wentii</i> : Aspwe1_0102826 and <i>Aspergillus sydowii</i> : Aspsy1_0032599	4.31773	4.99	1	2	2	2	381	43.4463	5.40186
Afu1g07090	Afu1g07090 AspGDID:ASPL0000101875 COORDS:Chr1_A_fumigatus_Af293:2015732-2011032C, translated using codon table 1 (1526 amino acids) Uncharacterized ORF; Ortholog of <i>A. nidulans FGSC A4</i> : AN5154, <i>A. niger CBS 513.88</i> : An07g09710, <i>A. oryzae RIB40</i> : AO090012000961, <i>Aspergillus wentii</i> : Aspwe1_0155743 and <i>Aspergillus sydowii</i> : Aspsy1_0134266	4.21256	2.03	1	2	2	2	1526	164.391	6.65381
Afu1g02670	Afu1g02670 AspGDID:ASPL0000101437 COORDS:Chr1_A_fumigatus_Af293:776882-775673C, translated using codon table 1 (320 amino acids) Uncharacterized ORF; ARP2/3 complex 34 kDa subunit; hypoxia induced protein	4.02988	6.88	1	2	2	2	320	36.915	6.87354
Afu5g12160	Afu5g12160 AspGDID:ASPL0000108272 COORDS:Chr5_A_fumigatus_Af293:3150617-3152384W, translated using codon table 1 (506 amino acids) Uncharacterized ORF; Putative alpha-1,2-mannosyltransferase with a predicted role in N-linked protein glycosylation; 1 predicted transmembrane domain	2.61234	5.73	1	2	2	3	506	58.8282	5.89697
Afu6g06580	Afu6g06580 AspGDID:ASPL0000109019 COORDS:Chr6_A_fumigatus_Af293:1433532-1432446C, translated using codon table 1 (269 amino acids) Uncharacterized ORF; Ortholog(s) have phosphomannomutase activity, role in ER to Golgi vesicle-mediated transport, establishment or maintenance of cell polarity, nuclear envelope organization, protein targeting to ER and cytosol, nucleus localization	1.735	7.43	1	2	2	2	269	30.5733	5.66846
Afu4g13720	mpkA AspGDID:ASPL0000107078 COORDS:Chr4_A_fumigatus_Af293:3591547-3593138W, translated using codon table 1 (424 amino acids) Verified ORF; Mitogen-activated protein kinase; activated by phosphorylation; role in cell wall signaling and the oxidative stress response; mpkA(p)-lacZ expression increased by cell wall disturbing compounds; required for adaptation to iron starvation	13.4743	9.43	1	1	3	4	424	48.4352	5.88428

## Sheet: MpkC GFP_CR 30min 
Accession	Description	Score	Coverage	# Proteins	# Unique Peptides	# Peptides	# PSMs	# AAs	MW [kDa]	calc. pI
Afu3g06550	Afu3g06550 AspGDID:ASPL0000105066 COORDS:Chr3_A_fumigatus_Af293:1623469-1625008W, translated using codon table 1 (469 amino acids) Uncharacterized ORF; Has domain(s) with predicted phosphatase activity, phosphoserine phosphatase activity and role in L-serine biosynthetic process, metabolic process	172.487	70.58	1	21	21	33	469	51.8419	5.89697
Afu6g09990	Afu6g09990 AspGDID:ASPL0000109355 COORDS:Chr6_A_fumigatus_Af293:2459187-2462825W, translated using codon table 1 (1095 amino acids) Uncharacterized ORF; Ortholog(s) have cytosol, nuclear envelope, nuclear membrane, nucleolus localization	79.9808	24.02	1	20	20	20	1095	121.526	4.729
Afu2g17000	Afu2g17000 AspGDID:ASPL0000104419 COORDS:Chr2_A_fumigatus_Af293:4544466-4551049W, translated using codon table 1 (2173 amino acids) Uncharacterized ORF; Ortholog of <i>A. nidulans FGSC A4</i> : AN5649, AN1674, AN0384, AN1268, AN7262, <i>A. fumigatus Af293</i> : Afu1g01700, Afu4g08730, Afu4g13630, Afu1g10012 and <i>A. niger CBS 513.88</i> : An01g09380, An01g06520, An04g09080, An04g03600	84.4844	14.13	1	19	19	23	2173	224.251	3.99268
Afu5g09100	mpkC AspGDID:ASPL0000107981 COORDS:Chr5_A_fumigatus_Af293:2340794-2342470W, translated using codon table 1 (378 amino acids) Verified ORF; Putative mitogen activated protein kinase (MAPK); involved in the oxidative stress response; transcript abundance increases in response to carbon source and oxidative stress	110.342	69.05	1	15	18	26	378	43.2801	5.75732
Afu6g03440	Afu6g03440 AspGDID:ASPL0000108799 COORDS:Chr6_A_fumigatus_Af293:738342-736781C, translated using codon table 1 (497 amino acids) Uncharacterized ORF; Putative fructosyl amine; transcript induced by voriconazole	71.5596	40.85	1	15	15	18	497	54.895	5.75732
Afu5g04330	Afu5g04330 AspGDID:ASPL0000107612 COORDS:Chr5_A_fumigatus_Af293:1164058-1160457C, translated using codon table 1 (967 amino acids) Verified ORF; Putative aminopeptidase; conidia-enriched protein; protein induced by heat shock; repressed by gliotoxin exposure	61.5735	20.58	1	15	15	17	967	108.639	6.7124
Afu2g06150	pdiA AspGDID:ASPL0000103438 COORDS:Chr2_A_fumigatus_Af293:1746610-1744786C, translated using codon table 1 (517 amino acids) Verified ORF; Putative protein disulfide isomerase; conidial surface associated	55.4917	39.26	1	15	15	15	517	56.152	4.70361
Afu2g13250	trpB AspGDID:ASPL0000104039 COORDS:Chr2_A_fumigatus_Af293:3407647-3405303C, translated using codon table 1 (735 amino acids) Uncharacterized ORF; Putative bifunctional tryptophan synthase	54.4055	27.89	1	12	12	14	735	78.7133	5.96045
Afu2g10070	Afu2g10070 AspGDID:ASPL0000103722 COORDS:Chr2_A_fumigatus_Af293:2576586-2580364W, translated using codon table 1 (1175 amino acids) Uncharacterized ORF; Putative carbamoyl-phosphate synthetase, large subunit	47.9796	17.53	1	12	13	14	1175	129.134	6.21436
Afu1g02030	Afu1g02030 AspGDID:ASPL0000101373 COORDS:Chr1_A_fumigatus_Af293:600839-603263W, translated using codon table 1 (740 amino acids) Uncharacterized ORF; Putative eukaryotic translation initiation factor 3 subunit; protein induced by heat shock	46.9814	22.3	1	12	12	13	740	84.4348	5.35107
Afu1g13710	Afu1g13710 AspGDID:ASPL0000102439 COORDS:Chr1_A_fumigatus_Af293:3650512-3647224C, translated using codon table 1 (1064 amino acids) Uncharacterized ORF; Isoleucyl-tRNA synthetase, cytoplasmic	39.5915	13.06	1	12	12	13	1064	122.315	6.43018
Afu7g02180	Afu7g02180 AspGDID:ASPL0000110013 COORDS:Chr7_A_fumigatus_Af293:584569-586235W, translated using codon table 1 (509 amino acids) Uncharacterized ORF; Ortholog(s) have UDP-N-acetylglucosamine diphosphorylase activity, role in UDP-N-acetylglucosamine biosynthetic process and cytosol, nucleus localization	39.9607	30.26	1	11	11	11	509	56.6802	6.1001
Afu4g11340	lys9 AspGDID:ASPL0000106843 COORDS:Chr4_A_fumigatus_Af293:2978580-2976809C, translated using codon table 1 (450 amino acids) Uncharacterized ORF; Saccharopine dehydrogenase; hypoxia induced protein; transcript induced by exposure to human airway epithelial cells	39.3914	31.78	1	11	11	12	450	49.4183	6.27783
Afu3g10800	Afu3g10800 AspGDID:ASPL0000105478 COORDS:Chr3_A_fumigatus_Af293:2807176-2811179W, translated using codon table 1 (1310 amino acids) Uncharacterized ORF; Ortholog of <i>A. nidulans FGSC A4</i> : AN4908, <i>A. niger CBS 513.88</i> : An02g06530, <i>A. oryzae RIB40</i> : AO090003000629, <i>Aspergillus wentii</i> : Aspwe1_0036953 and <i>Aspergillus sydowii</i> : Aspsy1_0043015	38.4143	13.21	1	11	11	11	1310	145.89	7.09326
Afu2g01010	Afu2g01010 AspGDID:ASPL0000102932 COORDS:Chr2_A_fumigatus_Af293:234729-236432W, translated using codon table 1 (534 amino acids) Uncharacterized ORF; Putative myo-inositol-phosphate synthase; transcript up-regulated in conidia exposed to neutrophils	46.3197	24.91	1	10	10	13	534	58.6346	6.22705
Afu1g04620	Afu1g04620 AspGDID:ASPL0000101631 COORDS:Chr1_A_fumigatus_Af293:1309293-1307958C, translated using codon table 1 (348 amino acids) Uncharacterized ORF; Putative zinc-containing alcohol dehydrogenase; reacts with rabbit immunosera exposed to A. fumigatus conidia; hypoxia induced protein; transcript up-regulated in conidia exposed to neutrophils; repressed by gliotoxin exposure	44.3427	39.94	1	10	10	12	348	37.8294	6.63916
Afu1g01740	Afu1g01740 AspGDID:ASPL0000101344 COORDS:Chr1_A_fumigatus_Af293:538203-536416C, translated using codon table 1 (531 amino acids) Uncharacterized ORF; Ortholog(s) have unfolded protein binding activity, role in protein folding and chaperonin-containing T-complex, nucleus localization	41.0457	29	1	10	10	10	531	57.1551	6.21436
Afu2g11150	Afu2g11150 AspGDID:ASPL0000103830 COORDS:Chr2_A_fumigatus_Af293:2856083-2857872W, translated using codon table 1 (468 amino acids) Uncharacterized ORF; Putative secretory-pathway GDP dissociation inhibitor; transcript and protein levels increase upon exposure to amphotericin B	36.6961	27.14	1	10	10	10	468	52.2473	5.50342
Afu5g02450	erg20 AspGDID:ASPL0000107425 COORDS:Chr5_A_fumigatus_Af293:631975-633093W, translated using codon table 1 (347 amino acids) Uncharacterized ORF; Putative polyprenyl synthetase; farnesyl-pyrophosphate synthetase; SrbA-regulated during hypoxia	35.5816	29.97	1	10	10	10	347	39.7375	5.50342
Afu5g08540	aspA AspGDID:ASPL0000107925 COORDS:Chr5_A_fumigatus_Af293:2167838-2169399W, translated using codon table 1 (382 amino acids) Verified ORF; Septin; hypoxia repressed protein; repressed by exposure to artemisinin	35.0865	37.43	1	10	10	10	382	43.2901	5.13525
Afu2g02320	Afu2g02320 AspGDID:ASPL0000103062 COORDS:Chr2_A_fumigatus_Af293:586013-584085C, translated using codon table 1 (571 amino acids) Uncharacterized ORF; Hsp70 chaperone	38.3967	22.07	1	9	9	10	571	61.7457	5.14795
Afu2g06000	Afu2g06000 AspGDID:ASPL0000103423 COORDS:Chr2_A_fumigatus_Af293:1696635-1700101W, translated using codon table 1 (1093 amino acids) Uncharacterized ORF; Putative NAD+ dependent glutamate dehydrogenase; transcript induced during conidial germination	37.217	13.82	1	9	9	9	1093	123.281	6.55127
Afu4g09740	Afu4g09740 AspGDID:ASPL0000106688 COORDS:Chr4_A_fumigatus_Af293:2536684-2538622W, translated using codon table 1 (567 amino acids) Uncharacterized ORF; Ortholog(s) have unfolded protein binding activity	35.9497	19.75	1	9	9	10	567	61.363	5.2876
Afu6g07640	Afu6g07640 AspGDID:ASPL0000109124 COORDS:Chr6_A_fumigatus_Af293:1735592-1737557W, translated using codon table 1 (604 amino acids) Uncharacterized ORF; Has domain(s) with predicted ATP binding, aminoacyl-tRNA ligase activity, lysine-tRNA ligase activity, nucleic acid binding activity, role in lysyl-tRNA aminoacylation, tRNA aminoacylation for protein translation and cytoplasm localization	35.3483	17.88	1	9	9	10	604	68.9187	6.06201
Afu3g01110	gua1 AspGDID:ASPL0000104631 COORDS:Chr3_A_fumigatus_Af293:261096-258836C, translated using codon table 1 (539 amino acids) Uncharacterized ORF; Putative GMP synthase ([glutamine-hydrolyzing); Yap1-dependent induction in response to hydrogen peroxide	33.5246	20.41	1	9	9	10	539	59.4337	6.26514
Afu5g05920	Afu5g05920 AspGDID:ASPL0000107669 COORDS:Chr5_A_fumigatus_Af293:1392015-1389862C, translated using codon table 1 (699 amino acids) Uncharacterized ORF; Putative glycyl-tRNA synthetase; protein induced by heat shock	32.6078	16.17	1	9	9	9	699	79.0498	6.46826
Afu8g03880	Afu8g03880 AspGDID:ASPL0000110724 COORDS:Chr8_A_fumigatus_Af293:825050-828378W, translated using codon table 1 (1011 amino acids) Uncharacterized ORF; Putative alanyl-tRNA synthetase; protein induced by hydrogen peroxide	29.9199	12.27	1	9	9	9	1011	113.644	6.48096
Afu4g03760	Afu4g03760 AspGDID:ASPL0000106195 COORDS:Chr4_A_fumigatus_Af293:1054642-1057888W, translated using codon table 1 (1060 amino acids) Uncharacterized ORF; Putative glycine dehydrogenase	29.0325	10.47	1	9	9	9	1060	115.13	7.15186
Afu7g05070	frdA AspGDID:ASPL0000110199 COORDS:Chr7_A_fumigatus_Af293:1197069-1195618C, translated using codon table 1 (483 amino acids) Uncharacterized ORF; Putative FAD-dependent oxidoreductase; immunoreactive protein	28.9745	20.91	1	9	9	9	483	51.2359	6.0874
Afu1g09800	Afu1g09800 AspGDID:ASPL0000102046 COORDS:Chr1_A_fumigatus_Af293:2543871-2545480W, translated using codon table 1 (394 amino acids) Uncharacterized ORF; Ortholog of S. cerevisiae OLA1; snoRNA Afu-304 encoded within intron 2	26.6286	26.14	1	9	9	9	394	43.452	7.81104
Afu7g01860	sti1 AspGDID:ASPL0000109981 COORDS:Chr7_A_fumigatus_Af293:501500-503455W, translated using codon table 1 (581 amino acids) Verified ORF; Putative heat shock protein; protein levels increase in response to amphotericin B; transcript induced by exposure to human airway epithelial cells; induced by gliotoxin exposure	44.1717	19.79	1	8	8	10	581	64.2614	5.57959
Afu1g14120	bfr1 AspGDID:ASPL0000102480 COORDS:Chr1_A_fumigatus_Af293:3774407-3776224W, translated using codon table 1 (510 amino acids) Uncharacterized ORF; Putative nuclear segregation protein	39.8451	21.37	1	8	8	11	510	57.388	9.12939
Afu1g08850	aspD AspGDID:ASPL0000101951 COORDS:Chr1_A_fumigatus_Af293:2293812-2292464C, translated using codon table 1 (346 amino acids) Verified ORF; Septin; localizes to long tubular structures within hyphae and to newly formed septa; repressed by exposure to artemisinin	36.5771	32.37	1	8	8	8	346	39.2071	7.84033
Afu2g02590	Afu2g02590 AspGDID:ASPL0000103089 COORDS:Chr2_A_fumigatus_Af293:666730-668457W, translated using codon table 1 (555 amino acids) Uncharacterized ORF; Aspartyl-tRNA synthetase	36.2607	18.74	1	8	8	10	555	61.5887	6.32861
Afu6g08750	Afu6g08750 AspGDID:ASPL0000109231 COORDS:Chr6_A_fumigatus_Af293:2073566-2071674C, translated using codon table 1 (578 amino acids) Uncharacterized ORF; Ortholog(s) have role in hyphal growth and cytosol, mitochondrion localization	34.1161	25.09	1	8	9	9	578	62.9819	8.17725
Afu4g12920	Afu4g12920 AspGDID:ASPL0000106998 COORDS:Chr4_A_fumigatus_Af293:3384591-3386472W, translated using codon table 1 (604 amino acids) Uncharacterized ORF; Putative mitochondrial histidyl-tRNA synthetase; protein induced by heat shock	31.111	21.19	1	8	8	8	604	66.6164	7.13721
Afu2g04700	Afu2g04700 AspGDID:ASPL0000103296 COORDS:Chr2_A_fumigatus_Af293:1283529-1287638W, translated using codon table 1 (1310 amino acids) Uncharacterized ORF; Ortholog(s) have role in cellular response to heat and cytosol, endoplasmic reticulum, nuclear outer membrane-endoplasmic reticulum membrane network localization	31.0883	8.24	1	8	8	10	1310	142.343	7.1958
Afu4g07580	Afu4g07580 AspGDID:ASPL0000106473 COORDS:Chr4_A_fumigatus_Af293:1969969-1971642W, translated using codon table 1 (516 amino acids) Uncharacterized ORF; Translation initiation factor EF-2 gamma subunit	30.2143	22.67	1	8	8	8	516	56.1044	7.09326
Afu6g04010	Afu6g04010 AspGDID:ASPL0000108856 COORDS:Chr6_A_fumigatus_Af293:901498-904822W, translated using codon table 1 (962 amino acids) Uncharacterized ORF; Ortholog(s) have importin-alpha export receptor activity, role in cell division, protein export from nucleus and nuclear membrane localization	27.8115	13.51	1	8	8	8	962	108.421	5.37646
Afu2g11840	cyc8 AspGDID:ASPL0000103898 COORDS:Chr2_A_fumigatus_Af293:3056794-3059852W, translated using codon table 1 (867 amino acids) Verified ORF; Transcriptional corepressor; ortholog of <i>A. nidulans</i> ssnF; calcium induced; mutation causes increased azole sensitivity	26.8625	12.92	1	8	8	8	867	94.5764	6.72705
Afu8g04800	Afu8g04800 AspGDID:ASPL0000110814 COORDS:Chr8_A_fumigatus_Af293:1101881-1098425C, translated using codon table 1 (1057 amino acids) Uncharacterized ORF; Putative valyl-tRNA synthetase; transcript induced by exposure to human airway epithelial cells	23.7338	11.45	1	8	8	8	1057	119.903	7.18115
Afu1g15000	Afu1g15000 AspGDID:ASPL0000102567 COORDS:Chr1_A_fumigatus_Af293:4029547-4031693W, translated using codon table 1 (643 amino acids) Uncharacterized ORF; Putative isopropylmalate synthase; transcript highly induced during conidial germination; SrbA-regulated during hypoxia	22.7258	13.53	1	8	8	8	643	71.1504	5.68115
Afu2g05650	Afu2g05650 AspGDID:ASPL0000103388 COORDS:Chr2_A_fumigatus_Af293:1582005-1580139C, translated using codon table 1 (604 amino acids) Uncharacterized ORF; Ortholog(s) have asparagine-tRNA ligase activity, role in asparaginyl-tRNA aminoacylation and cytosol localization	41.5169	19.37	1	7	7	9	604	68.2394	6.13818
Afu5g06680	gatA AspGDID:ASPL0000107744 COORDS:Chr5_A_fumigatus_Af293:1641603-1643263W, translated using codon table 1 (499 amino acids) Uncharacterized ORF; 4-aminobutyrate aminotransferase; transcript downregulated in response to voriconazole; calcium induced	40.9688	25.25	1	7	7	9	499	55.1725	8.93896
Afu3g10660	erg13 AspGDID:ASPL0000105464 COORDS:Chr3_A_fumigatus_Af293:2760689-2762268W, translated using codon table 1 (460 amino acids) Uncharacterized ORF; Putative hydroxymethyl glutaryl-coenzyme A synthase with a predicted role in ergosterol biosynthesis; SrbA-regulated during hypoxia	37.6975	28.26	1	7	7	7	460	50.7644	6.55127
Afu8g05580	coaT AspGDID:ASPL0000110887 COORDS:Chr8_A_fumigatus_Af293:1308874-1310609W, translated using codon table 1 (525 amino acids) Uncharacterized ORF; Putative coenzyme A transferase; transcript induced by exposure to human airway epithelial cells	34.1535	24.95	1	7	7	7	525	58.1086	6.771
Afu3g01580	Afu3g01580 AspGDID:ASPL0000104678 COORDS:Chr3_A_fumigatus_Af293:397771-395356C, translated using codon table 1 (646 amino acids) Uncharacterized ORF; Putative glucose-methanol-choline (GMC) oxidoreductase; protein induced by hydrogen peroxide; hypoxia induced protein; repressed by gliotoxin exposure	32.1166	14.4	1	7	7	8	646	72.1047	7.41553
Afu7g05470	Afu7g05470 AspGDID:ASPL0000110240 COORDS:Chr7_A_fumigatus_Af293:1320985-1322187W, translated using codon table 1 (352 amino acids) Uncharacterized ORF; Putative electron transfer flavoprotein alpha subunit; transcript induced by exposure to human airway epithelial cells; induced by exposure to artemisinin	32.0156	32.95	1	7	7	7	352	36.6673	6.27783
Afu1g13090	Afu1g13090 AspGDID:ASPL0000102377 COORDS:Chr1_A_fumigatus_Af293:3472871-3470577C, translated using codon table 1 (764 amino acids) Uncharacterized ORF; Ortholog(s) have anthranilate synthase activity, glyceraldehyde-3-phosphate dehydrogenase (NAD+) (phosphorylating) activity, indole-3-glycerol-phosphate synthase activity, phosphoribosylanthranilate isomerase activity	27.138	13.22	1	7	7	7	764	82.1806	6.34131
Afu1g08840	Afu1g08840 AspGDID:ASPL0000101950 COORDS:Chr1_A_fumigatus_Af293:2290909-2291935W, translated using codon table 1 (228 amino acids) Uncharacterized ORF; Ortholog(s) have guanylate kinase activity, role in GMP metabolic process and cytoplasm, nucleus localization	26.9532	39.47	1	7	7	7	228	25.5231	7.43018
Afu6g02630	Afu6g02630 AspGDID:ASPL0000108718 COORDS:Chr6_A_fumigatus_Af293:512097-510055C, translated using codon table 1 (441 amino acids) Uncharacterized ORF; Ortholog(s) have ATP-dependent RNA helicase activity	26.417	17.91	1	7	7	8	441	49.5704	5.8208
Afu4g11330	Afu4g11330 AspGDID:ASPL0000106842 COORDS:Chr4_A_fumigatus_Af293:2975120-2976392W, translated using codon table 1 (379 amino acids) Uncharacterized ORF; Ortholog(s) have ATPase activator activity, chaperone binding activity, role in protein folding, response to stress and cytosol localization	25.9175	27.18	1	7	7	7	379	42.3297	6.03662
Afu3g12100	Afu3g12100 AspGDID:ASPL0000105606 COORDS:Chr3_A_fumigatus_Af293:3178707-3181079W, translated using codon table 1 (694 amino acids) Uncharacterized ORF; Putative trehalase phosphorylase with a predicted role in the glucose-1-phosphate pathway	25.4777	13.54	1	7	7	8	694	78.2557	6.1001
Afu2g16020	Afu2g16020 AspGDID:ASPL0000104319 COORDS:Chr2_A_fumigatus_Af293:4237810-4239808W, translated using codon table 1 (566 amino acids) Uncharacterized ORF; Putative heat shock protein; transcript induced during conidial germination	25.0774	17.67	1	7	7	7	566	61.6862	6.87354
Afu1g05620	Afu1g05620 AspGDID:ASPL0000101730 COORDS:Chr1_A_fumigatus_Af293:1613252-1615558W, translated using codon table 1 (600 amino acids) Uncharacterized ORF; Ortholog(s) have phenylalanine-tRNA ligase activity, role in cellular response to drug, phenylalanyl-tRNA aminoacylation and cytosol, nucleus, phenylalanine-tRNA ligase complex localization	24.3613	19.33	1	7	7	7	600	67.8031	5.68115
Afu5g05490	Afu5g05490 AspGDID:ASPL0000107628 COORDS:Chr5_A_fumigatus_Af293:1274938-1276745W, translated using codon table 1 (474 amino acids) Uncharacterized ORF; Ortholog(s) have cytosol localization	23.9167	19.41	1	7	7	7	474	54.1563	6.43018
Afu6g07540	Afu6g07540 AspGDID:ASPL0000109114 COORDS:Chr6_A_fumigatus_Af293:1715811-1713540C, translated using codon table 1 (548 amino acids) Uncharacterized ORF; Ortholog(s) have chaperonin-containing T-complex localization	21.6055	14.23	1	7	7	7	548	59.8493	5.51611
Afu3g06610	Afu3g06610 AspGDID:ASPL0000105072 COORDS:Chr3_A_fumigatus_Af293:1639448-1641145W, translated using codon table 1 (508 amino acids) Uncharacterized ORF; Proteasome regulatory particle subunit; transcript induced by exposure to human airway epithelial cells	19.6869	13.78	1	7	7	7	508	58.4077	7.18115
Afu4g09030	Afu4g09030 AspGDID:ASPL0000106618 COORDS:Chr4_A_fumigatus_Af293:2345336-2342358C, translated using codon table 1 (953 amino acids) Verified ORF; Putative aminopeptidase; conidia-enriched protein; protein induced by heat shock; transcript induced by exposure to human airway epithelial cells; induced by gliotoxin exposure	18.4391	7.87	1	7	7	7	953	106.16	6.7417
Afu2g11060	Afu2g11060 AspGDID:ASPL0000103821 COORDS:Chr2_A_fumigatus_Af293:2836626-2837531W, translated using codon table 1 (158 amino acids) Uncharacterized ORF; Putative acylCoA binding family protein	46.2794	50.63	1	6	6	10	158	17.2987	5.99854
Afu5g07120	Afu5g07120 AspGDID:ASPL0000107787 COORDS:Chr5_A_fumigatus_Af293:1769812-1771261W, translated using codon table 1 (352 amino acids) Uncharacterized ORF; RNP domain protein; reacts with rabbit immunosera exposed to A. fumigatus conidia	40.3677	29.55	1	6	6	7	352	37.116	9.15869
Afu3g11400	pep2 AspGDID:ASPL0000105538 COORDS:Chr3_A_fumigatus_Af293:2990626-2992029W, translated using codon table 1 (398 amino acids) Verified ORF; Aspartic acid endopeptidase; conidia-enriched protein; conidial surface associated; predicted signal secretion sequence; hypoxia induced protein; transcript up-regulated in conidia exposed to neutrophils and by growth on BSA	36.3719	26.38	1	6	6	8	398	43.3277	4.99561
Afu5g04250	cysD AspGDID:ASPL0000107604 COORDS:Chr5_A_fumigatus_Af293:1136288-1134676C, translated using codon table 1 (434 amino acids) Uncharacterized ORF; Homocysteine synthase; transcript up-regulated in conidia exposed to neutrophils	32.3054	20.74	1	6	6	7	434	46.8658	6.354
Afu3g08840	Afu3g08840 AspGDID:ASPL0000105285 COORDS:Chr3_A_fumigatus_Af293:2262208-2266262W, translated using codon table 1 (1212 amino acids) Uncharacterized ORF; Ortholog(s) have role in hyphal growth, nuclear division and Golgi apparatus, hyphal tip localization	24.9347	7.67	1	6	6	6	1212	135.784	6.27783
Afu3g11360	Afu3g11360 AspGDID:ASPL0000105534 COORDS:Chr3_A_fumigatus_Af293:2979671-2978196C, translated using codon table 1 (451 amino acids) Uncharacterized ORF; Ortholog(s) have role in ascospore formation, cellular protein localization, cellular response to caffeine and eukaryotic translation initiation factor 3 complex assembly, <a href="#GOsection">more</a>	22.7792	16.19	1	6	6	7	451	51.7173	5.35107
Afu2g11940	ade13 AspGDID:ASPL0000103908 COORDS:Chr2_A_fumigatus_Af293:3080820-3078848C, translated using codon table 1 (483 amino acids) Uncharacterized ORF; Adenylosuccinate lyase; reacts with rabbit immunosera exposed to A. fumigatus conidia	21.7886	18.01	1	6	6	6	483	54.6911	6.55127
Afu2g13295	Afu2g13295 AspGDID:ASPL0000362536 COORDS:Chr2_A_fumigatus_Af293:3433790-3435299W, translated using codon table 1 (453 amino acids) Uncharacterized ORF; Ortholog(s) have cytosol, nucleus localization	21.3593	15.01	1	6	6	7	453	49.7017	6.80029
Afu2g12980	Afu2g12980 AspGDID:ASPL0000104011 COORDS:Chr2_A_fumigatus_Af293:3335985-3331790C, translated using codon table 1 (1263 amino acids) Uncharacterized ORF; Putative protein transport protein; transcript downregulated in response to amphotericin B	21.2249	6.73	1	6	6	6	1263	136.688	6.72705
Afu5g05500	Afu5g05500 AspGDID:ASPL0000107629 COORDS:Chr5_A_fumigatus_Af293:1277444-1278887W, translated using codon table 1 (424 amino acids) Uncharacterized ORF; Ortholog(s) have phosphoglycerate dehydrogenase activity, role in serine family amino acid biosynthetic process and cytosol localization	19.9927	18.87	1	6	6	6	424	45.8868	7.00537
Afu7g04190	Afu7g04190 AspGDID:ASPL0000110114 COORDS:Chr7_A_fumigatus_Af293:948503-946680C, translated using codon table 1 (519 amino acids) Uncharacterized ORF; Ortholog(s) have methyltransferase activity, role in cellular response to biotic stimulus, filamentous growth, glucosylceramide biosynthetic process, pathogenesis and plasma membrane localization	19.9837	18.5	1	6	6	6	519	58.9195	6.87354
Afu1g06790	Afu1g06790 AspGDID:ASPL0000101847 COORDS:Chr1_A_fumigatus_Af293:1937397-1941009W, translated using codon table 1 (1095 amino acids) Uncharacterized ORF; Ortholog(s) have role in protein import into nucleus, regulation of mitotic cell cycle and cytosol, nuclear membrane, nucleolus localization	19.5314	8.95	1	6	6	6	1095	121.355	4.76709
Afu2g10030	Afu2g10030 AspGDID:ASPL0000103718 COORDS:Chr2_A_fumigatus_Af293:2570628-2569665C, translated using codon table 1 (265 amino acids) Uncharacterized ORF; Immunoreactive protein; calcium induced; transcript induced by exposure to human airway epithelial cells; induced by gliotoxin exposure	19.4852	29.06	1	6	6	6	265	28.2482	6.3667
Afu4g13700	Afu4g13700 AspGDID:ASPL0000107076 COORDS:Chr4_A_fumigatus_Af293:3586027-3588483W, translated using codon table 1 (737 amino acids) Uncharacterized ORF; Ortholog(s) have cytosol localization	18.8225	10.04	1	6	6	6	737	84.4129	7.09326
Afu1g07090	Afu1g07090 AspGDID:ASPL0000101875 COORDS:Chr1_A_fumigatus_Af293:2015732-2011032C, translated using codon table 1 (1526 amino acids) Uncharacterized ORF; Ortholog of <i>A. nidulans FGSC A4</i> : AN5154, <i>A. niger CBS 513.88</i> : An07g09710, <i>A. oryzae RIB40</i> : AO090012000961, <i>Aspergillus wentii</i> : Aspwe1_0155743 and <i>Aspergillus sydowii</i> : Aspsy1_0134266	18.0886	4.85	1	6	6	6	1526	164.391	6.65381
Afu1g12940	sakA AspGDID:ASPL0000102362 COORDS:Chr1_A_fumigatus_Af293:3428181-3429807W, translated using codon table 1 (366 amino acids) Verified ORF; Putative mitogen-activated protein kinase (MAPK) with predicted roles in the osmotic and oxidative stress responses; involved in sensing nitrogen in the medium	38.3735	22.68	1	5	6	9	366	41.9334	5.60498
Afu2g07960	Afu2g07960 AspGDID:ASPL0000103516 COORDS:Chr2_A_fumigatus_Af293:2038888-2047447W, translated using codon table 1 (2674 amino acids) Uncharacterized ORF; Ortholog(s) have role in regulation of translational elongation and cytosolic ribosome, extracellular region, mitochondrion localization	32.7426	3.4	1	5	5	8	2674	291.954	5.85889
Afu5g09240	sod1 AspGDID:ASPL0000107993 COORDS:Chr5_A_fumigatus_Af293:2379492-2380591W, translated using codon table 1 (154 amino acids) Verified ORF; Cu/Zn superoxide dismutase; recognized by sera from aspergillosis patients; highly expressed in conidia; transcript induced by copper starvation, menadione, gliotoxin and growth at high temperature; protein induced by hydrogen peroxide	32.5238	59.74	1	5	5	6	154	15.9569	6.52197
Afu4g08710	Afu4g08710 AspGDID:ASPL0000106586 COORDS:Chr4_A_fumigatus_Af293:2256334-2255247C, translated using codon table 1 (287 amino acids) Uncharacterized ORF; Putative short chain dehydrogenase; transcriptionally up-regulated in conidia exposed to neutrophils; induced by gliotoxin exposure	26.1965	24.74	1	5	5	6	287	30.9087	5.38916
Afu3g05450	Afu3g05450 AspGDID:ASPL0000104961 COORDS:Chr3_A_fumigatus_Af293:1314948-1313258C, translated using codon table 1 (478 amino acids) Uncharacterized ORF; Putative glutamate carboxypeptidase	25.287	17.78	1	5	5	5	478	52.9817	5.71924
Afu4g10050	Afu4g10050 AspGDID:ASPL0000106719 COORDS:Chr4_A_fumigatus_Af293:2602022-2602919W, translated using codon table 1 (149 amino acids) Uncharacterized ORF; Calmodulin	24.1817	40.27	1	5	6	7	149	17.0019	4.27197
Afu2g07620	Afu2g07620 AspGDID:ASPL0000103483 COORDS:Chr2_A_fumigatus_Af293:1942912-1941117C, translated using codon table 1 (534 amino acids) Uncharacterized ORF; Cystathionine beta-synthase; transcript induced by exposure to human airway epithelial cells	22.5408	15.54	1	5	5	5	534	57.7783	6.97607
Afu2g13240	Afu2g13240 AspGDID:ASPL0000104038 COORDS:Chr2_A_fumigatus_Af293:3402661-3404769W, translated using codon table 1 (506 amino acids) Uncharacterized ORF; Putative V-type ATPase, B subunit; transcript induced by exposure to human airway epithelial cells	21.2945	15.42	1	5	5	5	506	56.383	5.99854
Afu4g00610	Afu4g00610 AspGDID:ASPL0000105980 COORDS:Chr4_A_fumigatus_Af293:166314-168179W, translated using codon table 1 (601 amino acids) Uncharacterized ORF; Putative aryl-alcohol dehydrogenase	20.3288	15.31	1	5	5	5	601	65.2895	5.51611
Afu6g03810	Afu6g03810 AspGDID:ASPL0000108836 COORDS:Chr6_A_fumigatus_Af293:840093-839212C, translated using codon table 1 (255 amino acids) Uncharacterized ORF; Putative mitochondrial ATP synthase D chain; hypoxia induced protein	20.2629	28.24	1	5	5	5	255	28.6782	9.0415
Afu3g08470	Afu3g08470 AspGDID:ASPL0000105250 COORDS:Chr3_A_fumigatus_Af293:2171618-2174019W, translated using codon table 1 (511 amino acids) Verified ORF; Glucose-6-phosphate 1-dehydrogenase	19.9893	11.55	1	5	5	6	511	58.8991	7.00537
Afu6g07940	Afu6g07940 AspGDID:ASPL0000109154 COORDS:Chr6_A_fumigatus_Af293:1837939-1839097W, translated using codon table 1 (318 amino acids) Uncharacterized ORF; Putative lactoylglutathione lyase	19.7619	24.21	1	5	5	5	318	36.5071	6.39209
Afu7g02310	Afu7g02310 AspGDID:ASPL0000110026 COORDS:Chr7_A_fumigatus_Af293:629238-628529C, translated using codon table 1 (217 amino acids) Uncharacterized ORF; Putative adenine phosphoribosyltransferase 1; transcript induced by exposure to human airway epithelial cells; induced by gliotoxin exposure	19.2642	33.18	1	5	5	5	217	23.6063	6.39209
Afu4g12990	trr1 AspGDID:ASPL0000107005 COORDS:Chr4_A_fumigatus_Af293:3402102-3403373W, translated using codon table 1 (392 amino acids) Uncharacterized ORF; Putative thioredoxin reductase; transcript upregulated during conidial germination and in hyphae exposed to neutrophils	19.2369	23.47	1	5	5	5	392	42.1635	5.51611
Afu1g07530	Afu1g07530 AspGDID:ASPL0000101918 COORDS:Chr1_A_fumigatus_Af293:2122230-2121254C, translated using codon table 1 (257 amino acids) Uncharacterized ORF; Ortholog(s) have adenylate kinase activity, role in ADP biosynthetic process, DNA replication initiation and cytosol, mitochondrial intermembrane space, mitochondrial outer membrane, nucleus localization	18.4929	25.68	1	5	5	5	257	28.6848	7.88428
Afu5g06500	Afu5g06500 AspGDID:ASPL0000107726 COORDS:Chr5_A_fumigatus_Af293:1587081-1588611W, translated using codon table 1 (447 amino acids) Uncharacterized ORF; Acyl-CoA dehydrogenase family protein with a predicted role in fatty acid beta oxidation; induced by exposure to artemisinin	17.3393	14.32	1	5	5	5	447	49.1848	8.90967
Afu1g04540	Afu1g04540 AspGDID:ASPL0000101622 COORDS:Chr1_A_fumigatus_Af293:1284032-1285205W, translated using codon table 1 (323 amino acids) Uncharacterized ORF; NADH-cytochrome b5 reductase involved in oxidative phosphorylation; hypoxia induced protein; induced by exposure to artemisinin	17.0691	20.12	1	5	5	5	323	36.151	9.0415
Afu2g07520	Afu2g07520 AspGDID:ASPL0000363027 COORDS:Chr2_A_fumigatus_Af293:1926201-1928684W, translated using codon table 1 (614 amino acids) Uncharacterized ORF; Ortholog(s) have aminopeptidase activity, epoxide hydrolase activity, role in cellular lipid metabolic process, protein catabolic process and cytosol, extracellular region, nucleus localization	16.3078	8.14	1	5	5	6	614	69.6784	6.21436
Afu4g12850	clxA AspGDID:ASPL0000106991 COORDS:Chr4_A_fumigatus_Af293:3365625-3367567W, translated using codon table 1 (563 amino acids) Verified ORF; Calnexin, ER membrane chaperone involved in folding of glycoproteins directed to the secretory pathway; hypoxia repressed; enriched in dormant conidia	15.9944	9.95	1	5	5	5	563	61.8151	5.07178
Afu5g09910	Afu5g09910 AspGDID:ASPL0000108059 COORDS:Chr5_A_fumigatus_Af293:2564144-2563392C, translated using codon table 1 (217 amino acids) Uncharacterized ORF; Putative p-nitroreductase family protein; protein induced by heat shock; Yap1-dependent induction in response to hydrogen peroxide; induced by gliotoxin exposure	15.713	26.73	1	5	5	5	217	24.2985	5.90967
Afu2g07350	Afu2g07350 AspGDID:ASPL0000103458 COORDS:Chr2_A_fumigatus_Af293:1876933-1878405W, translated using codon table 1 (456 amino acids) Uncharacterized ORF; Ortholog(s) have glutamate-5-semialdehyde dehydrogenase activity, role in proline biosynthetic process and cytosol, nucleus localization	15.5003	14.47	1	5	5	5	456	48.7838	5.94775
Afu6g02230	glkA AspGDID:ASPL0000108678 COORDS:Chr6_A_fumigatus_Af293:395467-393918C, translated using codon table 1 (493 amino acids) Verified ORF; Putative glucokinase; conidia-enriched protein; transcripts extremely abundant in resting conidia, levels decline during germination; transcript induced by exposure to human airway epithelial cells	15.1865	13.39	1	5	5	5	493	54.4198	5.50342
Afu1g05310	Afu1g05310 AspGDID:ASPL0000101699 COORDS:Chr1_A_fumigatus_Af293:1529654-1532946W, translated using codon table 1 (1066 amino acids) Uncharacterized ORF; Ortholog(s) have role in cellular response to nitrogen starvation, negative regulation of G0 to G1 transition, ribosomal small subunit biogenesis and 90S preribosome, nucleolus localization	14.6119	6.19	1	5	5	5	1066	119.041	7.28369
Afu2g07680	sidA AspGDID:ASPL0000103489 COORDS:Chr2_A_fumigatus_Af293:1961124-1959561C, translated using codon table 1 (501 amino acids) Verified ORF; L-ornithine N5-oxygenase; first committed step in siderophore biosynthesis; essential for virulence; induced by exposure to human airway epithelial cells; expression up-regulated by iron starvation; activated by L-arginine; SrbA-regulated	13.1449	11.98	1	5	5	5	501	56.841	8.6167
Afu5g02910	Afu5g02910 AspGDID:ASPL0000107470 COORDS:Chr5_A_fumigatus_Af293:772100-770907C, translated using codon table 1 (354 amino acids) Uncharacterized ORF; NAP family protein	11.3124	17.8	1	5	5	5	354	41.0408	4.50049
Afu5g06130	Afu5g06130 AspGDID:ASPL0000107690 COORDS:Chr5_A_fumigatus_Af293:1465997-1464574C, translated using codon table 1 (331 amino acids) Uncharacterized ORF; Succinyl-CoA synthetase alpha subunit; hypoxia induced protein	29.1399	23.56	1	4	4	6	331	34.552	8.63135
Afu6g08360	Afu6g08360 AspGDID:ASPL0000109193 COORDS:Chr6_A_fumigatus_Af293:1958167-1959214W, translated using codon table 1 (332 amino acids) Uncharacterized ORF; Thiazole biosynthesis enzyme; hypoxia induced protein; induced by gliotoxin exposure	28.0555	24.4	1	4	4	6	332	35.469	5.84619
Afu6g08720	Afu6g08720 AspGDID:ASPL0000109228 COORDS:Chr6_A_fumigatus_Af293:2067644-2066477C, translated using codon table 1 (342 amino acids) Uncharacterized ORF; Putative 5'-methylthioadenosine phosphorylase; transcript induced by exposure to human airway epithelial cells	27.9223	13.45	1	4	4	6	342	37.582	7.38623
Afu6g03460	Afu6g03460 AspGDID:ASPL0000108801 COORDS:Chr6_A_fumigatus_Af293:741171-742895W, translated using codon table 1 (574 amino acids) Uncharacterized ORF; Has domain(s) with predicted ATP binding activity	24.1159	12.37	1	4	4	5	574	63.4223	6.13818
Afu7g05370	aspB AspGDID:ASPL0000110230 COORDS:Chr7_A_fumigatus_Af293:1290537-1292385W, translated using codon table 1 (463 amino acids) Verified ORF; Putative septin; Yap1-dependent induction in response to hydrogen peroxide; localizes to septa and to rings at the base of developing phialides; hypoxia repressed protein	23.0366	15.55	1	4	5	6	463	52.5207	6.97607
Afu5g06010	Afu5g06010 AspGDID:ASPL0000107678 COORDS:Chr5_A_fumigatus_Af293:1425309-1424188C, translated using codon table 1 (247 amino acids) Uncharacterized ORF; Ortholog(s) have ribosomal large subunit binding activity	21.1455	30.77	1	4	4	4	247	26.5706	4.85596
Afu6g06780	rpt4 AspGDID:ASPL0000109040 COORDS:Chr6_A_fumigatus_Af293:1481801-1483206W, translated using codon table 1 (393 amino acids) Uncharacterized ORF; Proteasome regulatory particle subunit; transcript induced by exposure to human airway epithelial cells	20.5671	16.79	1	4	5	6	393	44.0853	5.80811
Afu3g08900	Afu3g08900 AspGDID:ASPL0000105291 COORDS:Chr3_A_fumigatus_Af293:2277005-2275596C, translated using codon table 1 (408 amino acids) Uncharacterized ORF; Putative tubulin-specific chaperone c; transcript up-regulated in conidia exposed to neutrophils; transcript induced by exposure to human airway epithelial cells	20.1702	15.44	1	4	4	5	408	44.215	5.40186
Afu4g11510	srb1 AspGDID:ASPL0000106859 COORDS:Chr4_A_fumigatus_Af293:3032998-3031629C, translated using codon table 1 (364 amino acids) Verified ORF; GDP-mannose pyrophosphorylase, which catalyses the synthesis of GDP-mannose from GTP and mannose-1-phosphate in cell wall biosynthesis	18.8075	16.21	1	4	4	5	364	40.0991	7.48877
Afu1g09830	Afu1g09830 AspGDID:ASPL0000102049 COORDS:Chr1_A_fumigatus_Af293:2550807-2551983W, translated using codon table 1 (348 amino acids) Uncharacterized ORF; Ortholog(s) have protein complex scaffold activity, role in posttranslational protein targeting to membrane, response to heat and TRC complex, nucleus localization	17.215	18.1	1	4	4	5	348	36.3346	5.021
Afu8g04810	Afu8g04810 AspGDID:ASPL0000110815 COORDS:Chr8_A_fumigatus_Af293:1104248-1103015C, translated using codon table 1 (336 amino acids) Uncharacterized ORF; Ortholog(s) have role in circadian regulation of gene expression, conidium formation, establishment or maintenance of bipolar cell polarity regulating cell shape and protein phosphorylation, <a href="#GOsection">more</a>	16.0735	19.94	1	4	4	4	336	39.5131	7.31299
Afu3g11350	arsA AspGDID:ASPL0000105533 COORDS:Chr3_A_fumigatus_Af293:2972476-2973613W, translated using codon table 1 (340 amino acids) Uncharacterized ORF; ATPase; proteins are recognized and bound by Get3p then delivered to the ER	14.3364	15.59	1	4	4	4	340	37.416	5.09717
Afu5g02850	Afu5g02850 AspGDID:ASPL0000107464 COORDS:Chr5_A_fumigatus_Af293:754834-756051W, translated using codon table 1 (324 amino acids) Uncharacterized ORF; Has domain(s) with predicted arylformamidase activity and role in tryptophan catabolic process to kynurenine	14.0912	17.59	1	4	4	5	324	36.303	5.21143
Afu7g05930	mepB AspGDID:ASPL0000110285 COORDS:Chr7_A_fumigatus_Af293:1452895-1455148W, translated using codon table 1 (716 amino acids) Verified ORF; Putative metallopeptidase with similarity to mammalian thimet oligopeptidases; conidia-enriched protein; transcript induced by exposure to human airway epithelial cells and by growth on BSA as a sole nitrogen source	13.2268	6.42	1	4	4	4	716	81.8584	5.78271
Afu2g03580	Afu2g03580 AspGDID:ASPL0000103185 COORDS:Chr2_A_fumigatus_Af293:953968-955580W, translated using codon table 1 (518 amino acids) Uncharacterized ORF; Ortholog(s) have phenylalanine-tRNA ligase activity, role in phenylalanyl-tRNA aminoacylation and cytosol, phenylalanine-tRNA ligase complex localization	10.9137	9.27	1	4	4	4	518	58.509	7.44482
Afu4g10780	Afu4g10780 AspGDID:ASPL0000106791 COORDS:Chr4_A_fumigatus_Af293:2806494-2819008W, translated using codon table 1 (4039 amino acids) Uncharacterized ORF; Ortholog(s) have role in mRNA export from nucleus and nucleus localization	10.8206	0.99	1	4	4	4	4039	450.543	4.99561
Afu4g04318	Afu4g04318 AspGDID:ASPL0000366886 COORDS:Chr4_A_fumigatus_Af293:1217563-1217111C, translated using codon table 1 (111 amino acids) Uncharacterized ORF; Ortholog of <i>A. nidulans FGSC A4</i> : AN7011, <i>A. niger CBS 513.88</i> : An14g00530, <i>Aspergillus wentii</i> : Aspwe1_0053203, <i>Aspergillus sydowii</i> : Aspsy1_0184132 and <i>Aspergillus terreus NIH2624</i> : ATET_02726	22.1781	41.44	1	3	3	5	111	11.343	7.38623
Afu4g07210	Afu4g07210 AspGDID:ASPL0000106435 COORDS:Chr4_A_fumigatus_Af293:1872976-1871931C, translated using codon table 1 (327 amino acids) Uncharacterized ORF; Mitochondrial acetolactate synthase small subunit; hypoxia induced protein; SrbA-regulated during hypoxia	20.2291	13.46	1	3	3	5	327	35.5515	6.85889
Afu6g03730	Afu6g03730 AspGDID:ASPL0000108828 COORDS:Chr6_A_fumigatus_Af293:823850-821958C, translated using codon table 1 (558 amino acids) Uncharacterized ORF; 2-methylcitrate dehydratase; hypoxia repressed protein; transcript up-regulated in conidia exposed to neutrophils and to human airway epithelial cells; no human homolog	20.1287	8.24	1	3	3	5	558	62.0658	8.36768
Afu5g11240	Afu5g11240 AspGDID:ASPL0000108183 COORDS:Chr5_A_fumigatus_Af293:2877011-2875843C, translated using codon table 1 (311 amino acids) Uncharacterized ORF; Ortholog(s) have carbonyl reductase (NADPH) activity, oxidoreductase activity, acting on the aldehyde or oxo group of donors, NAD or NADP as acceptor activity and cytosol, nucleus, ribosome localization	14.7295	13.5	1	3	3	4	311	33.6528	8.98291
Afu1g11690	Afu1g11690 AspGDID:ASPL0000102233 COORDS:Chr1_A_fumigatus_Af293:3078136-3076712C, translated using codon table 1 (455 amino acids) Uncharacterized ORF; Ortholog(s) have role in actin cortical patch assembly, actin nucleation, positive regulation of actin nucleation and actin cortical patch, cytosol, medial cortex, nucleus, old growing cell tip localization	14.2766	17.14	1	3	3	3	455	44.9764	11.4438
Afu2g01040	Afu2g01040 AspGDID:ASPL0000102935 COORDS:Chr2_A_fumigatus_Af293:239825-238336C, translated using codon table 1 (379 amino acids) Uncharacterized ORF; Putative formaldehyde dehydrogenase; transcript up-regulated in conidia exposed to neutrophils	14.1718	16.09	1	3	3	3	379	40.0182	7.26904
Afu2g04820	Afu2g04820 AspGDID:ASPL0000103307 COORDS:Chr2_A_fumigatus_Af293:1326025-1323818C, translated using codon table 1 (716 amino acids) Uncharacterized ORF; Putative translation release factor eRF3; transcript induced by exposure to human airway epithelial cells	13.0302	7.54	1	3	4	4	716	77.2757	8.04541
Afu3g09280	Afu3g09280 AspGDID:ASPL0000105325 COORDS:Chr3_A_fumigatus_Af293:2354001-2355185W, translated using codon table 1 (308 amino acids) Uncharacterized ORF; Has domain(s) with predicted ribosome binding, translation initiation factor activity, role in regulation of translational initiation and eukaryotic translation initiation factor 3 complex localization	12.8775	14.94	1	3	3	3	308	34.3175	5.26221
Afu5g12780	Afu5g12780 AspGDID:ASPL0000108332 COORDS:Chr5_A_fumigatus_Af293:3352075-3353129W, translated using codon table 1 (332 amino acids) Uncharacterized ORF; Ortholog of <i>A. nidulans FGSC A4</i> : AN8430, <i>A. niger CBS 513.88</i> : An18g00330, <i>A. oryzae RIB40</i> : AO090010000134, <i>Neosartorya fischeri NRRL 181</i> : NFIA_074390 and <i>Aspergillus wentii</i> : Aspwe1_0449405	12.2933	12.35	1	3	3	3	332	35.7809	5.31299
Afu4g07650	cyp6 AspGDID:ASPL0000106480 COORDS:Chr4_A_fumigatus_Af293:1987776-1988776W, translated using codon table 1 (209 amino acids) Uncharacterized ORF; Putative peptidyl-prolyl cis-trans isomerase	12.248	17.7	1	3	3	3	209	22.9459	8.27979
Afu3g10460	ntf2 AspGDID:ASPL0000105444 COORDS:Chr3_A_fumigatus_Af293:2708847-2709680W, translated using codon table 1 (124 amino acids) Uncharacterized ORF; Putative nuclear transport factor	11.5412	33.87	1	3	3	3	124	14.1939	4.75439
Afu5g10640	Afu5g10640 AspGDID:ASPL0000108128 COORDS:Chr5_A_fumigatus_Af293:2721762-2723271W, translated using codon table 1 (391 amino acids) Uncharacterized ORF; Ortholog(s) have tyrosine-tRNA ligase activity, role in tyrosyl-tRNA aminoacylation and cytosol, nucleus localization	11.408	11	1	3	4	4	391	43.5878	6.58057
Afu4g09110	ccp1 AspGDID:ASPL0000106626 COORDS:Chr4_A_fumigatus_Af293:2379568-2378394C, translated using codon table 1 (366 amino acids) Uncharacterized ORF; Putative cytochrome c peroxidase; protein induced by heat shock and by hydrogen peroxide; transcript up-regulated in conidia exposed to neutrophils	10.9462	11.75	1	3	3	3	366	40.3542	8.55811
Afu3g07790	Afu3g07790 AspGDID:ASPL0000105183 COORDS:Chr3_A_fumigatus_Af293:1963894-1965412W, translated using codon table 1 (464 amino acids) Uncharacterized ORF; Argininosuccinate lyase; hypoxia induced protein	10.4838	7.76	1	3	3	3	464	51.8196	6.27783
Afu5g03430	Afu5g03430 AspGDID:ASPL0000107522 COORDS:Chr5_A_fumigatus_Af293:933107-927630C, translated using codon table 1 (1748 amino acids) Uncharacterized ORF; Ortholog(s) have histone demethylase activity (H3-trimethyl-K4 specific) activity	10.4181	3.83	1	3	3	3	1748	196.733	6.62451
Afu3g11170	Afu3g11170 AspGDID:ASPL0000105515 COORDS:Chr3_A_fumigatus_Af293:2928974-2931529W, translated using codon table 1 (759 amino acids) Uncharacterized ORF; Ortholog(s) have sequence-specific DNA binding activity and role in carotenoid biosynthetic process, circadian rhythm, conidiophore development	10.2387	5.8	1	3	3	3	759	84.1513	6.7124
Afu3g06530	sC AspGDID:ASPL0000105064 COORDS:Chr3_A_fumigatus_Af293:1618981-1616721C, translated using codon table 1 (574 amino acids) Uncharacterized ORF; Putative ATP sulfurylase; sulfate adenylyltransferase; reacts with rabbit immunosera exposed to A. fumigatus conidia; hypoxia repressed protein	10.1451	6.27	1	3	3	3	574	64.2932	7.06396
Afu1g02190	rab11 AspGDID:ASPL0000101389 COORDS:Chr1_A_fumigatus_Af293:648599-649525W, translated using codon table 1 (210 amino acids) Uncharacterized ORF; Ras GTPase; hypoxia repressed protein	9.28008	16.19	1	3	3	3	210	23.2808	5.68115
Afu5g10650	Afu5g10650 AspGDID:ASPL0000108129 COORDS:Chr5_A_fumigatus_Af293:2725117-2723747C, translated using codon table 1 (412 amino acids) Uncharacterized ORF; Has domain(s) with predicted FMN binding, oxidoreductase activity, oxidoreductase activity, acting on the CH-NH2 group of donors, pyridoxamine-phosphate oxidase activity	8.62421	8.98	1	3	3	3	412	45.9339	6.25244
Afu5g08290	Afu5g08290 AspGDID:ASPL0000107901 COORDS:Chr5_A_fumigatus_Af293:2105292-2104352C, translated using codon table 1 (283 amino acids) Uncharacterized ORF; Ortholog(s) have intracellular localization	8.30332	11.31	1	3	3	3	283	31.3553	6.69775
Afu1g11420	Afu1g11420 AspGDID:ASPL0000102205 COORDS:Chr1_A_fumigatus_Af293:3010805-3006406C, translated using codon table 1 (1378 amino acids) Uncharacterized ORF; Ortholog(s) have mRNA 5'-UTR binding, translation repressor activity, nucleic acid binding activity	7.96004	2.76	1	3	3	3	1378	152.19	7.56201
Afu2g02560	Afu2g02560 AspGDID:ASPL0000103086 COORDS:Chr2_A_fumigatus_Af293:659395-662458W, translated using codon table 1 (916 amino acids) Uncharacterized ORF; Ortholog(s) have role in establishment or maintenance of cell polarity and cytosol localization	7.45587	3.71	1	3	3	3	916	100.615	5.65576
Afu5g13920	wos2 AspGDID:ASPL0000108443 COORDS:Chr5_A_fumigatus_Af293:3643780-3644692W, translated using codon table 1 (201 amino acids) Uncharacterized ORF; Putative Hsp90 binding co-chaperone; reacts with rabbit immunosera exposed to A. fumigatus conidia	6.58254	13.93	1	3	3	3	201	22.1986	4.4751
Afu5g12570	Afu5g12570 AspGDID:ASPL0000108311 COORDS:Chr5_A_fumigatus_Af293:3257995-3258330W, translated using codon table 1 (83 amino acids) Uncharacterized ORF; Ortholog(s) have RNA binding activity, role in mRNA splicing, via spliceosome and U4/U6 x U5 tri-snRNP complex, U6 snRNP, cytoplasm, nucleolus, small nucleolar ribonucleoprotein complex localization	21.9841	51.81	1	2	2	3	83	9.3466	4.37354
Afu5g09400	Afu5g09400 AspGDID:ASPL0000108009 COORDS:Chr5_A_fumigatus_Af293:2418391-2419402W, translated using codon table 1 (294 amino acids) Uncharacterized ORF; Putative carbonyl reductase; transcript up-regulated in conidia exposed to neutrophils	14.517	11.56	1	2	2	4	294	31.4496	6.30322
Afu2g05950	Afu2g05950 AspGDID:ASPL0000103418 COORDS:Chr2_A_fumigatus_Af293:1671741-1671187C, translated using codon table 1 (126 amino acids) Uncharacterized ORF; Ortholog(s) have RNA binding activity and role in mRNA splicing, via spliceosome, maturation of SSU-rRNA from tricistronic rRNA transcript (SSU-rRNA, 5.8S rRNA, LSU-rRNA)	10.0784	28.57	1	2	2	2	126	13.6013	7.34229
Afu4g06890	cyp51A AspGDID:ASPL0000106403 COORDS:Chr4_A_fumigatus_Af293:1785331-1783713C, translated using codon table 1 (515 amino acids) Verified ORF; 14-alpha sterol demethylase; commonly mutated in drug resistant isolates; putative ortholog of A. nidulans pdmA; transcript induced by exposure to fluconazole and voriconazole; SrbA-regulated during hypoxia	9.55103	7.77	1	2	2	2	515	58.0308	8.52881
Afu7g03990	ura6 AspGDID:ASPL0000110094 COORDS:Chr7_A_fumigatus_Af293:896510-895803C, translated using codon table 1 (235 amino acids) Uncharacterized ORF; Uridylate kinase; induced by gliotoxin exposure	8.71758	9.36	1	2	2	3	235	25.5441	5.80811
Afu3g13820	Afu3g13820 AspGDID:ASPL0000105775 COORDS:Chr3_A_fumigatus_Af293:3651038-3650223C, translated using codon table 1 (201 amino acids) Uncharacterized ORF; Putative HET-C2 protein; transcript induced by exposure to human airway epithelial cells	8.50136	12.94	1	2	2	2	201	22.1986	6.94678
Afu7g05450	sun1 AspGDID:ASPL0000110238 COORDS:Chr7_A_fumigatus_Af293:1314669-1313311C, translated using codon table 1 (414 amino acids) Verified ORF; Novel beta-1,3-glucan modifying enzyme involved in fungal morphogenesis	8.25785	11.59	1	2	2	2	414	43.4769	5.47803
Afu4g07910	Afu4g07910 AspGDID:ASPL0000106506 COORDS:Chr4_A_fumigatus_Af293:2067034-2063752C, translated using codon table 1 (1065 amino acids) Uncharacterized ORF; Putative zinc-dependent peptidase	8.08717	3.1	1	2	2	2	1065	118.489	5.64307
Afu2g09870	tif35 AspGDID:ASPL0000103703 COORDS:Chr2_A_fumigatus_Af293:2523373-2524473W, translated using codon table 1 (290 amino acids) Uncharacterized ORF; Eukaryotic translation initiation factor 3 subunit G	7.01912	8.28	1	2	2	2	290	31.8511	8.79248
Afu3g10300	Afu3g10300 AspGDID:ASPL0000105428 COORDS:Chr3_A_fumigatus_Af293:2667473-2665767C, translated using codon table 1 (524 amino acids) Uncharacterized ORF; Putative galactokinase with a role in galactose catabolism; transcript up-regulated in conidia exposed to neutrophils	6.80182	4.58	1	2	2	2	524	57.6085	6.65381
Afu4g04410	Afu4g04410 AspGDID:ASPL0000106258 COORDS:Chr4_A_fumigatus_Af293:1247460-1248557W, translated using codon table 1 (319 amino acids) Uncharacterized ORF; Immunoreactive protein; has predicted 3-hydroxyacyl-CoA dehydrogenase activity, coenzyme binding, nucleotide binding activity and a putative role in fatty acid metabolism	6.71056	8.46	1	2	2	2	319	33.6826	7.37158
Afu2g13680	Afu2g13680 AspGDID:ASPL0000104083 COORDS:Chr2_A_fumigatus_Af293:3556768-3558269W, translated using codon table 1 (434 amino acids) Uncharacterized ORF; Putative calcium/calmodulin-dependent protein kinase; transcript induced by exposure to human airway epithelial cells	6.54223	5.76	1	2	2	2	434	48.691	6.49365
Afu2g14710	Afu2g14710 AspGDID:ASPL0000104185 COORDS:Chr2_A_fumigatus_Af293:3864121-3861244C, translated using codon table 1 (917 amino acids) Uncharacterized ORF; Ortholog(s) have nucleus localization	6.30578	4.91	1	2	2	2	917	102.576	6.46826
Afu4g03650	Afu4g03650 AspGDID:ASPL0000106184 COORDS:Chr4_A_fumigatus_Af293:1028974-1030431W, translated using codon table 1 (446 amino acids) Uncharacterized ORF; Ribosome associated DnaJ chaperone Zuotin	6.1098	5.83	1	2	2	2	446	51.2243	8.19189
Afu5g08830	hexA AspGDID:ASPL0000107954 COORDS:Chr5_A_fumigatus_Af293:2265787-2268175W, translated using codon table 1 (537 amino acids) Verified ORF; Putative woronin body protein; hypoxia repressed protein	5.22791	4.1	1	2	2	2	537	61.3693	8.79248
Afu2g13710	Afu2g13710 AspGDID:ASPL0000104086 COORDS:Chr2_A_fumigatus_Af293:3562035-3560485C, translated using codon table 1 (470 amino acids) Uncharacterized ORF; NADH-ubiquinone oxidoreductase 49 kDa subunit	4.95056	3.83	1	2	2	2	470	52.8217	6.65381
Afu6g09330	Afu6g09330 AspGDID:ASPL0000109287 COORDS:Chr6_A_fumigatus_Af293:2227723-2229437W, translated using codon table 1 (468 amino acids) Uncharacterized ORF; Protein of unknown function	4.79872	5.77	1	2	2	2	468	54.5045	5.021
Afu2g15290	Afu2g15290 AspGDID:ASPL0000104246 COORDS:Chr2_A_fumigatus_Af293:4053500-4054061W, translated using codon table 1 (136 amino acids) Verified ORF; Conidia-enriched protein of unknown function; transcript downregulated in response to voriconazole; hypoxia repressed protein	4.58577	19.85	1	2	2	2	136	14.8394	6.75635

## Sheet: MpkC GFP_CR 60 min
Accession	Description	Score	Coverage	# Proteins	# Unique Peptides	# Peptides	# PSMs	# AAs	MW [kDa]	calc. pI
Afu3g06550	Afu3g06550 AspGDID:ASPL0000105066 COORDS:Chr3_A_fumigatus_Af293:1623469-1625008W, translated using codon table 1 (469 amino acids) Uncharacterized ORF; Has domain(s) with predicted phosphatase activity, phosphoserine phosphatase activity and role in L-serine biosynthetic process, metabolic process	183.2	74.84	1	22	22	35	469	51.8419	5.89697
Afu5g09100	mpkC AspGDID:ASPL0000107981 COORDS:Chr5_A_fumigatus_Af293:2340794-2342470W, translated using codon table 1 (378 amino acids) Verified ORF; Putative mitogen activated protein kinase (MAPK); involved in the oxidative stress response; transcript abundance increases in response to carbon source and oxidative stress	124.9	58.99	1	14	17	30	378	43.2801	5.75732
Afu1g12940	sakA AspGDID:ASPL0000102362 COORDS:Chr1_A_fumigatus_Af293:3428181-3429807W, translated using codon table 1 (366 amino acids) Verified ORF; Putative mitogen-activated protein kinase (MAPK) with predicted roles in the osmotic and oxidative stress responses; involved in sensing nitrogen in the medium	75.7943	49.73	1	12	13	16	366	41.9334	5.60498
Afu6g03440	Afu6g03440 AspGDID:ASPL0000108799 COORDS:Chr6_A_fumigatus_Af293:738342-736781C, translated using codon table 1 (497 amino acids) Uncharacterized ORF; Putative fructosyl amine; transcript induced by voriconazole	35.064	28.37	1	9	9	10	497	54.895	5.75732
Afu5g03430	Afu5g03430 AspGDID:ASPL0000107522 COORDS:Chr5_A_fumigatus_Af293:933107-927630C, translated using codon table 1 (1748 amino acids) Uncharacterized ORF; Ortholog(s) have histone demethylase activity (H3-trimethyl-K4 specific) activity	19.5031	5.95	1	7	7	8	1748	196.733	6.62451
Afu2g07620	Afu2g07620 AspGDID:ASPL0000103483 COORDS:Chr2_A_fumigatus_Af293:1942912-1941117C, translated using codon table 1 (534 amino acids) Uncharacterized ORF; Cystathionine beta-synthase; transcript induced by exposure to human airway epithelial cells	26.1289	18.91	1	6	6	7	534	57.7783	6.97607
Afu3g01580	Afu3g01580 AspGDID:ASPL0000104678 COORDS:Chr3_A_fumigatus_Af293:397771-395356C, translated using codon table 1 (646 amino acids) Uncharacterized ORF; Putative glucose-methanol-choline (GMC) oxidoreductase; protein induced by hydrogen peroxide; hypoxia induced protein; repressed by gliotoxin exposure	15.1329	9.44	1	5	5	5	646	72.1047	7.41553
Afu7g05470	Afu7g05470 AspGDID:ASPL0000110240 COORDS:Chr7_A_fumigatus_Af293:1320985-1322187W, translated using codon table 1 (352 amino acids) Uncharacterized ORF; Putative electron transfer flavoprotein alpha subunit; transcript induced by exposure to human airway epithelial cells; induced by exposure to artemisinin	14.2103	24.43	1	5	5	5	352	36.6673	6.27783
Afu1g07090	Afu1g07090 AspGDID:ASPL0000101875 COORDS:Chr1_A_fumigatus_Af293:2015732-2011032C, translated using codon table 1 (1526 amino acids) Uncharacterized ORF; Ortholog of <i>A. nidulans FGSC A4</i> : AN5154, <i>A. niger CBS 513.88</i> : An07g09710, <i>A. oryzae RIB40</i> : AO090012000961, <i>Aspergillus wentii</i> : Aspwe1_0155743 and <i>Aspergillus sydowii</i> : Aspsy1_0134266	11.8424	6.62	1	5	5	5	1526	164.391	6.65381
Afu5g08290	Afu5g08290 AspGDID:ASPL0000107901 COORDS:Chr5_A_fumigatus_Af293:2105292-2104352C, translated using codon table 1 (283 amino acids) Uncharacterized ORF; Ortholog(s) have intracellular localization	11.505	19.08	1	5	5	5	283	31.3553	6.69775
Afu5g06780	Afu5g06780 AspGDID:ASPL0000107754 COORDS:Chr5_A_fumigatus_Af293:1670126-1668765C, translated using codon table 1 (453 amino acids) Uncharacterized ORF; Putative carbamoyl-phosphate synthase; protein induced by hydrogen peroxide	15.1964	17.22	1	4	4	4	453	49.306	7.13721
Afu6g03460	Afu6g03460 AspGDID:ASPL0000108801 COORDS:Chr6_A_fumigatus_Af293:741171-742895W, translated using codon table 1 (574 amino acids) Uncharacterized ORF; Has domain(s) with predicted ATP binding activity	15.6411	11.5	1	3	3	3	574	63.4223	6.13818
Afu6g04970	Afu6g04970 AspGDID:ASPL0000108951 COORDS:Chr6_A_fumigatus_Af293:1181194-1182540W, translated using codon table 1 (428 amino acids) Uncharacterized ORF; Ortholog(s) have O-phospho-L-serine:2-oxoglutarate aminotransferase activity, role in L-serine biosynthetic process, purine nucleobase biosynthetic process and cytosol localization	12.9486	12.85	1	3	3	3	428	46.8644	6.81494
Afu2g15430	Afu2g15430 AspGDID:ASPL0000104260 COORDS:Chr2_A_fumigatus_Af293:4077712-4076912C, translated using codon table 1 (266 amino acids) Uncharacterized ORF; Sorbitol/xylulose reductase	12.5527	23.68	1	3	3	3	266	28.202	6.354
Afu5g07300	Afu5g07300 AspGDID:ASPL0000107804 COORDS:Chr5_A_fumigatus_Af293:1814759-1815768W, translated using codon table 1 (260 amino acids) Uncharacterized ORF; Electron transfer flavoprotein, beta subunit	10.5404	18.08	1	3	3	3	260	28.2232	8.96826
Afu4g06900	Afu4g06900 AspGDID:ASPL0000106404 COORDS:Chr4_A_fumigatus_Af293:1787004-1789272W, translated using codon table 1 (573 amino acids) Uncharacterized ORF; Ortholog(s) have asparagine synthase (glutamine-hydrolyzing) activity, role in asparagine biosynthetic process and cytosol, nucleus localization	10.5027	9.95	1	3	3	3	573	64.6714	6.29053
Afu5g02360	Afu5g02360 AspGDID:ASPL0000107416 COORDS:Chr5_A_fumigatus_Af293:608651-606106C, translated using codon table 1 (698 amino acids) Uncharacterized ORF; Ortholog(s) have role in hyphal growth, peroxisome organization, vacuole organization and Golgi apparatus localization	10.0952	9.31	1	3	3	3	698	78.1349	8.17725
Afu5g07000	Afu5g07000 AspGDID:ASPL0000107775 COORDS:Chr5_A_fumigatus_Af293:1735022-1736346W, translated using codon table 1 (360 amino acids) Uncharacterized ORF; Puttaive NAD binding Rossmann fold oxidoreductase; transcript up-regulated in conidia exposed to neutrophils	9.52994	13.89	1	3	3	3	360	39.9447	7.03467
Afu5g11380	Afu5g11380 AspGDID:ASPL0000108197 COORDS:Chr5_A_fumigatus_Af293:2924786-2923943C, translated using codon table 1 (197 amino acids) Uncharacterized ORF; Putative Rho-GDP dissociation inhibitor; transcript and protein levels increased in response to amphotericin B	9.37705	25.89	1	3	3	3	197	22.3004	5.90967
Afu1g10970	Afu1g10970 AspGDID:ASPL0000102160 COORDS:Chr1_A_fumigatus_Af293:2865856-2868959W, translated using codon table 1 (955 amino acids) Uncharacterized ORF; Ortholog(s) have cytosol, plasma membrane localization	9.22783	3.66	1	3	3	3	955	106.49	5.70654
Afu2g14030	Afu2g14030 AspGDID:ASPL0000104118 COORDS:Chr2_A_fumigatus_Af293:3674689-3672338C, translated using codon table 1 (719 amino acids) Uncharacterized ORF; Ortholog(s) have arginine-tRNA ligase activity, role in arginyl-tRNA aminoacylation and cytosol, mitochondrion localization	8.93352	6.54	1	3	3	3	719	80.6727	8.00146
Afu5g09400	Afu5g09400 AspGDID:ASPL0000108009 COORDS:Chr5_A_fumigatus_Af293:2418391-2419402W, translated using codon table 1 (294 amino acids) Uncharacterized ORF; Putative carbonyl reductase; transcript up-regulated in conidia exposed to neutrophils	8.05419	13.95	1	3	3	3	294	31.4496	6.30322
Afu4g07650	cyp6 AspGDID:ASPL0000106480 COORDS:Chr4_A_fumigatus_Af293:1987776-1988776W, translated using codon table 1 (209 amino acids) Uncharacterized ORF; Putative peptidyl-prolyl cis-trans isomerase	7.22905	17.7	1	3	3	3	209	22.9459	8.27979
Afu5g00720	Afu5g00720 AspGDID:ASPL0000107256 COORDS:Chr5_A_fumigatus_Af293:204504-203702C, translated using codon table 1 (248 amino acids) Uncharacterized ORF; Has domain(s) with predicted N-acetyltransferase activity	6.79618	12.9	1	3	3	4	248	29.0426	5.32568
Afu6g03590	mcsA AspGDID:ASPL0000108814 COORDS:Chr6_A_fumigatus_Af293:783347-784866W, translated using codon table 1 (465 amino acids) Verified ORF; Methylcitrate synthase; catalyses the condensation of propionyl-CoA and oxaloacetate to methylcitrate; conidia-enriched protein; mutants killed more readily by alveolar macrophages and show decreased virulence in mice	5.16825	7.96	1	3	3	3	465	51.3799	8.93896
Afu1g12840	niiA AspGDID:ASPL0000102352 COORDS:Chr1_A_fumigatus_Af293:3393418-3397198W, translated using codon table 1 (1102 amino acids) Uncharacterized ORF; Putative nitrite reductase; nitrogen-regulated gene, used as a conditional promoter; protein induced by heat shock; transcript downregulated in response to voriconazole	5.03002	3.9	1	3	3	3	1102	123.067	6.62451
Afu1g15450	Afu1g15450 AspGDID:ASPL0000102610 COORDS:Chr1_A_fumigatus_Af293:4172637-4171167C, translated using codon table 1 (424 amino acids) Uncharacterized ORF; Ortholog(s) have adenylosuccinate synthase activity, sulfinylpropanyl adenylate synthase activity	4.5165	8.25	1	3	3	3	424	46.6189	6.90283
Afu6g09070	Afu6g09070 AspGDID:ASPL0000109262 COORDS:Chr6_A_fumigatus_Af293:2156209-2154962C, translated using codon table 1 (415 amino acids) Uncharacterized ORF; 3'(2'),5';-bisphosphate nucleotidase; hypoxia repressed protein; predicted essential gene	3.90762	7.71	1	3	3	3	415	44.1318	5.8335
Afu8g04570	Afu8g04570 AspGDID:ASPL0000110792 COORDS:Chr8_A_fumigatus_Af293:1042481-1044659W, translated using codon table 1 (607 amino acids) Uncharacterized ORF; Ortholog(s) have nucleus localization	0	6.43	1	3	3	3	607	66.5554	5.22412
Afu5g10570	Afu5g10570 AspGDID:ASPL0000108121 COORDS:Chr5_A_fumigatus_Af293:2705752-2704997C, translated using codon table 1 (154 amino acids) Verified ORF; Cofilin	13.9783	24.03	1	2	2	3	154	17.0176	5.65576
Afu6g12660	Afu6g12660 AspGDID:ASPL0000109609 COORDS:Chr6_A_fumigatus_Af293:3198955-3199723W, translated using codon table 1 (155 amino acids) Uncharacterized ORF; 40S ribosomal protein S10b; protein level decreases upon heat shock	10.0373	14.84	1	2	2	3	155	17.8492	9.72998
Afu6g13140	Afu6g13140 AspGDID:ASPL0000109656 COORDS:Chr6_A_fumigatus_Af293:3322359-3321489C, translated using codon table 1 (232 amino acids) Uncharacterized ORF; Ortholog(s) have 3,4-dihydroxy-2-butanone-4-phosphate synthase activity, role in aerobic respiration, riboflavin biosynthetic process and cytosol, mitochondrial intermembrane space, nucleus localization	8.04229	12.5	1	2	2	2	232	25.2938	5.03369
Afu3g11640	Afu3g11640 AspGDID:ASPL0000105562 COORDS:Chr3_A_fumigatus_Af293:3058607-3059789W, translated using codon table 1 (368 amino acids) Uncharacterized ORF; Homoserine dehydrogenase; no human homolog	7.16815	8.15	1	2	2	2	368	38.4803	5.87158
Afu1g10810	Afu1g10810 AspGDID:ASPL0000102144 COORDS:Chr1_A_fumigatus_Af293:2821017-2822416W, translated using codon table 1 (391 amino acids) Uncharacterized ORF; Ortholog(s) have role in calcium ion transport into cytosol and cytosol, plasma membrane localization	6.85896	7.67	1	2	2	2	391	44.1257	6.96143
Afu3g10360	Afu3g10360 AspGDID:ASPL0000105434 COORDS:Chr3_A_fumigatus_Af293:2688254-2685337C, translated using codon table 1 (878 amino acids) Uncharacterized ORF; Ortholog(s) have protein transporter activity and role in ascospore formation, intracellular protein transport, protein retention in Golgi apparatus, retrograde transport, endosome to Golgi	6.68302	5.24	1	2	2	2	878	99.6631	5.96045
Afu5g09210	alp2 AspGDID:ASPL0000107990 COORDS:Chr5_A_fumigatus_Af293:2366798-2365176C, translated using codon table 1 (495 amino acids) Verified ORF; Autophagic (vacuolar) serine protease; allergen Asp f 18; predicted signal sequence for secretion; transcript induced by growth on hydrogen peroxide; transcript up-regulated in conidia exposed to neutrophils	6.35993	8.08	1	2	2	2	495	52.6075	6.25244
Afu3g13820	Afu3g13820 AspGDID:ASPL0000105775 COORDS:Chr3_A_fumigatus_Af293:3651038-3650223C, translated using codon table 1 (201 amino acids) Uncharacterized ORF; Putative HET-C2 protein; transcript induced by exposure to human airway epithelial cells	6.29616	9.95	1	2	2	2	201	22.1986	6.94678
Afu6g08660	Afu6g08660 AspGDID:ASPL0000109222 COORDS:Chr6_A_fumigatus_Af293:2052348-2048629C, translated using codon table 1 (1239 amino acids) Uncharacterized ORF; Ortholog of <i>A. nidulans</i> AN3906; hypoxia repressed protein	6.29597	3.15	1	2	2	2	1239	131.817	5.09717
Afu1g13740	Afu1g13740 AspGDID:ASPL0000102442 COORDS:Chr1_A_fumigatus_Af293:3658931-3663766W, translated using codon table 1 (1578 amino acids) Uncharacterized ORF; Predicted pentafunctional polypeptide; predicted essential gene	5.97743	2.15	1	2	2	2	1578	171.364	6.68311
Afu4g03650	Afu4g03650 AspGDID:ASPL0000106184 COORDS:Chr4_A_fumigatus_Af293:1028974-1030431W, translated using codon table 1 (446 amino acids) Uncharacterized ORF; Ribosome associated DnaJ chaperone Zuotin	5.91903	5.38	1	2	2	2	446	51.2243	8.19189
Afu2g11440	pup2 AspGDID:ASPL0000103858 COORDS:Chr2_A_fumigatus_Af293:2945654-2946723W, translated using codon table 1 (250 amino acids) Uncharacterized ORF; Putative proteasome component; reacts with rabbit immunosera exposed to A. fumigatus conidia	5.87962	12.8	1	2	2	2	250	27.3116	4.85596
Afu5g06500	Afu5g06500 AspGDID:ASPL0000107726 COORDS:Chr5_A_fumigatus_Af293:1587081-1588611W, translated using codon table 1 (447 amino acids) Uncharacterized ORF; Acyl-CoA dehydrogenase family protein with a predicted role in fatty acid beta oxidation; induced by exposure to artemisinin	5.80496	5.59	1	2	2	2	447	49.1848	8.90967
Afu5g10650	Afu5g10650 AspGDID:ASPL0000108129 COORDS:Chr5_A_fumigatus_Af293:2725117-2723747C, translated using codon table 1 (412 amino acids) Uncharacterized ORF; Has domain(s) with predicted FMN binding, oxidoreductase activity, oxidoreductase activity, acting on the CH-NH2 group of donors, pyridoxamine-phosphate oxidase activity	5.35985	5.83	1	2	2	2	412	45.9339	6.25244
Afu2g02150	S10a AspGDID:ASPL0000103045 COORDS:Chr2_A_fumigatus_Af293:536724-537226W, translated using codon table 1 (116 amino acids) Uncharacterized ORF; Putative ribosomal protein S10	5.00775	16.38	1	2	2	2	116	13.0562	9.71533
Afu8g02840	Afu8g02840 AspGDID:ASPL0000110720 COORDS:Chr8_A_fumigatus_Af293:771371-768813C, translated using codon table 1 (800 amino acids) Uncharacterized ORF; Putative mitochondrial dynamin GTPase with a predicted role in mitochondrial fission	4.9985	2.5	1	2	2	2	800	89.1729	6.65381
Afu6g12680	Afu6g12680 AspGDID:ASPL0000109611 COORDS:Chr6_A_fumigatus_Af293:3202825-3203845W, translated using codon table 1 (135 amino acids) Uncharacterized ORF; Ortholog(s) have hydrolase activity, role in nucleotide metabolic process and cytoplasm, nucleus localization	4.39043	13.33	1	2	2	2	135	14.9728	6.87354
Afu5g02560	Afu5g02560 AspGDID:ASPL0000107436 COORDS:Chr5_A_fumigatus_Af293:661794-664322W, translated using codon table 1 (646 amino acids) Uncharacterized ORF; Ortholog(s) have protein serine/threonine phosphatase activity	4.14691	5.42	1	2	2	2	646	73.8305	6.99072
Afu2g02050	cyp7 AspGDID:ASPL0000103035 COORDS:Chr2_A_fumigatus_Af293:509986-508618C, translated using codon table 1 (373 amino acids) Uncharacterized ORF; Putative peptidyl-prolyl cis-trans isomerase	3.59904	7.77	1	2	2	2	373	41.3168	5.98584
Afu3g14420	chsG AspGDID:ASPL0000105832 COORDS:Chr3_A_fumigatus_Af293:3831868-3834921W, translated using codon table 1 (911 amino acids) Verified ORF; Putative class III chitin synthase; predicted gene pair with AFUA_5G00760	3.52712	2.85	1	2	2	2	911	101.605	8.14795
Afu2g10010	Afu2g10010 AspGDID:ASPL0000103716 COORDS:Chr2_A_fumigatus_Af293:2564207-2567853W, translated using codon table 1 (1048 amino acids) Uncharacterized ORF; Ortholog(s) have cytosol, nuclear envelope localization	3.33416	2.1	1	2	2	2	1048	118.882	4.84326
Afu1g09930	gcy1 AspGDID:ASPL0000102059 COORDS:Chr1_A_fumigatus_Af293:2570399-2571627W, translated using codon table 1 (349 amino acids) Uncharacterized ORF; Putative glycerol dehydrogenase; protein level decreases upon heat shock; transcript up-regulated in conidia exposed to neutrophils	3.22965	8.31	1	2	2	2	349	39.1061	8.83643
Afu5g08930	Afu5g08930 AspGDID:ASPL0000107964 COORDS:Chr5_A_fumigatus_Af293:2293971-2292255C, translated using codon table 1 (462 amino acids) Uncharacterized ORF; Putative isovaleryl-CoA dehydrogenase; ortholog of <i>A. nidulans</i> ivdA; transcript induced by exposure to human airway epithelial cells	3.18303	6.49	1	2	2	2	462	50.3204	7.41553
Afu5g11760	Afu5g11760 AspGDID:ASPL0000108233 COORDS:Chr5_A_fumigatus_Af293:3025861-3026948W, translated using codon table 1 (341 amino acids) Uncharacterized ORF; Ortholog(s) have cytoplasm localization	2.9582	4.4	1	2	2	2	341	37.0492	6.29053
Afu5g05820	Afu5g05820 AspGDID:ASPL0000107659 COORDS:Chr5_A_fumigatus_Af293:1354916-1353658C, translated using codon table 1 (355 amino acids) Uncharacterized ORF; Ortholog(s) have homoserine kinase activity, role in homoserine metabolic process, threonine biosynthetic process and cytoplasm localization	2.92286	6.48	1	2	2	2	355	38.4901	6.7417
Afu1g04820	Afu1g04820 AspGDID:ASPL0000101651 COORDS:Chr1_A_fumigatus_Af293:1367321-1366072C, translated using codon table 1 (350 amino acids) Uncharacterized ORF; D-xylose reductase	2.75133	7.43	1	2	2	2	350	39.7594	6.55127
Afu5g02850	Afu5g02850 AspGDID:ASPL0000107464 COORDS:Chr5_A_fumigatus_Af293:754834-756051W, translated using codon table 1 (324 amino acids) Uncharacterized ORF; Has domain(s) with predicted arylformamidase activity and role in tryptophan catabolic process to kynurenine	2.60736	8.33	1	2	2	2	324	36.303	5.21143
Afu4g13720	mpkA AspGDID:ASPL0000107078 COORDS:Chr4_A_fumigatus_Af293:3591547-3593138W, translated using codon table 1 (424 amino acids) Verified ORF; Mitogen-activated protein kinase; activated by phosphorylation; role in cell wall signaling and the oxidative stress response; mpkA(p)-lacZ expression increased by cell wall disturbing compounds; required for adaptation to iron starvation	14.6885	9.67	1	1	3	4	424	48.4352	5.88428
