# Supplementary material for: Aspergillus fumigatus High Osmolarity Glycerol Mitogen Activated Protein Kinases SakA and MpkC Physically Interact During Osmotic and Cell Wall Stresses
Source: Front Microbiol. 2019 May 7;10:918. doi: 10.3389/fmicb.2019.00918 (PMC6514138; doi:10.3389/fmicb.2019.00918)
Supplement: Supplementary file 5 [file Table_5.xls]

## Sheet: SakA GFP CR_5 min
Supplementary Table S5 - Proteins identified as interacting with SakA::GFP (after subtracting from the wild-type strain) in presence of Congo Red 300µg/mL (5, 15, 30 and 60 min)
Accession	Description	Score	Coverage	# Proteins	# Unique Peptides	# Peptides	# PSMs	# AAs	MW [kDa]	calc. pI
Afu1g12940	sakA AspGDID:ASPL0000102362 COORDS:Chr1_A_fumigatus_Af293:3428181-3429807W, translated using codon table 1 (366 amino acids) Verified ORF; Putative mitogen-activated protein kinase (MAPK) with predicted roles in the osmotic and oxidative stress responses; involved in sensing nitrogen in the medium	365.59	77.32	1	21	21	105	366	41.9334	5.60498
Afu3g06550	Afu3g06550 AspGDID:ASPL0000105066 COORDS:Chr3_A_fumigatus_Af293:1623469-1625008W, translated using codon table 1 (469 amino acids) Uncharacterized ORF; Has domain(s) with predicted phosphatase activity, phosphoserine phosphatase activity and role in L-serine biosynthetic process, metabolic process	196.149	78.46	1	21	21	38	469	51.8419	5.89697
Afu7g02260	Afu7g02260 AspGDID:ASPL0000110021 COORDS:Chr7_A_fumigatus_Af293:610666-608054C, translated using codon table 1 (784 amino acids) Uncharacterized ORF; Ortholog of <i>A. nidulans FGSC A4</i> : AN9087/oefA, <i>A. niger CBS 513.88</i> : An12g00390, <i>A. oryzae RIB40</i> : AO090038000604, <i>Aspergillus wentii</i> : Aspwe1_0113275 and <i>Aspergillus sydowii</i> : Aspsy1_0061396	62.8673	21.81	1	10	10	14	784	84.5043	8.67529
Afu2g12910	Afu2g12910 AspGDID:ASPL0000104004 COORDS:Chr2_A_fumigatus_Af293:3311664-3309244C, translated using codon table 1 (741 amino acids) Uncharacterized ORF; Ortholog of <i>A. nidulans FGSC A4</i> : AN6264, <i>A. niger CBS 513.88</i> : An02g01620, <i>A. oryzae RIB40</i> : AO090026000343, <i>Aspergillus wentii</i> : Aspwe1_0117790 and <i>Aspergillus sydowii</i> : Aspsy1_0151049	46.2273	14.44	1	7	7	11	741	80.0612	10.0229
Afu2g03490	Afu2g03490 AspGDID:ASPL0000103178 COORDS:Chr2_A_fumigatus_Af293:921519-923827W, translated using codon table 1 (645 amino acids) Uncharacterized ORF; Putative calcium/calmodulin-dependent protein kinase; calcium induced; transcript induced by exposure to human airway epithelial cells	43.9808	17.83	1	8	8	11	645	72.0815	6.87354
Afu6g02540	Afu6g02540 AspGDID:ASPL0000108708 COORDS:Chr6_A_fumigatus_Af293:481139-483203W, translated using codon table 1 (643 amino acids) Uncharacterized ORF; Has domain(s) with predicted actin binding activity	41.5941	22.4	1	10	10	11	643	65.9529	9.5249
Afu3g13870	nsdD AspGDID:ASPL0000105780 COORDS:Chr3_A_fumigatus_Af293:3674484-3676292W, translated using codon table 1 (493 amino acids) Verified ORF; Putative GATA-type transcriptional activator; required during an early stage of mating; plays a role in resistance toward cell wall stress	39.6316	28.19	1	9	9	10	493	52.9912	9.26123
Afu3g08540	Afu3g08540 AspGDID:ASPL0000105256 COORDS:Chr3_A_fumigatus_Af293:2192405-2191310C, translated using codon table 1 (323 amino acids) Uncharacterized ORF; Ortholog(s) have calcium ion binding, zinc ion binding activity and role in asexual sporulation, axial cellular bud site selection, bipolar cellular bud site selection, regulation of COPII vesicle coating	39.5491	34.98	1	6	6	8	323	36.0919	7.34229
Afu2g09730	Afu2g09730 AspGDID:ASPL0000103689 COORDS:Chr2_A_fumigatus_Af293:2494100-2495262W, translated using codon table 1 (321 amino acids) Uncharacterized ORF; Has domain(s) with predicted nucleic acid binding, nucleotide binding activity	23.0568	23.99	1	5	5	6	321	34.7668	10.6382
Afu2g04680	pakA AspGDID:ASPL0000103294 COORDS:Chr2_A_fumigatus_Af293:1275738-1273126C, translated using codon table 1 (815 amino acids) Uncharacterized ORF; Protein serine/threonine kinase; similar to Ste20, a sexual development regulator	22.8338	15.95	1	6	6	6	815	89.6158	9.43701
Afu2g12900	Afu2g12900 AspGDID:ASPL0000104003 COORDS:Chr2_A_fumigatus_Af293:3308048-3307099C, translated using codon table 1 (271 amino acids) Uncharacterized ORF; Ortholog(s) have urease activity, role in urea catabolic process and cytosol, nucleus localization	21.8888	31.73	1	7	7	7	271	29.1578	6.22705
Afu6g08360	Afu6g08360 AspGDID:ASPL0000109193 COORDS:Chr6_A_fumigatus_Af293:1958167-1959214W, translated using codon table 1 (332 amino acids) Uncharacterized ORF; Thiazole biosynthesis enzyme; hypoxia induced protein; induced by gliotoxin exposure	20.5525	24.1	1	4	4	4	332	35.469	5.84619
Afu2g14670	Afu2g14670 AspGDID:ASPL0000104181 COORDS:Chr2_A_fumigatus_Af293:3849283-3851093W, translated using codon table 1 (585 amino acids) Uncharacterized ORF; Ortholog(s) have role in ascospore formation, cellular response to caffeine, eukaryotic translation initiation factor 3 complex assembly, gamma-tubulin complex localization	19.6441	15.38	1	5	5	5	585	65.1913	5.26221
Afu6g03460	Afu6g03460 AspGDID:ASPL0000108801 COORDS:Chr6_A_fumigatus_Af293:741171-742895W, translated using codon table 1 (574 amino acids) Uncharacterized ORF; Has domain(s) with predicted ATP binding activity	19.5458	15.16	1	5	5	5	574	63.4223	6.13818
Afu4g04120	Afu4g04120 AspGDID:ASPL0000106230 COORDS:Chr4_A_fumigatus_Af293:1160684-1163043W, translated using codon table 1 (598 amino acids) Uncharacterized ORF; Ortholog(s) have guanyl-nucleotide exchange factor adaptor activity	19.3046	12.54	1	6	6	7	598	66.2801	7.56201
Afu1g05560	Afu1g05560 AspGDID:ASPL0000101724 COORDS:Chr1_A_fumigatus_Af293:1596516-1594882C, translated using codon table 1 (389 amino acids) Uncharacterized ORF; Ortholog(s) have role in cytoplasmic translation, filamentous growth and cytosol, nucleus, polysomal ribosome, polysome localization	18.796	15.42	1	4	4	5	389	42.7828	8.74854
Afu3g08650	Afu3g08650 AspGDID:ASPL0000105267 COORDS:Chr3_A_fumigatus_Af293:2214642-2217724W, translated using codon table 1 (939 amino acids) Uncharacterized ORF; Putative C1-tetrahydrofolate synthase; transcript up-regulated in conidia exposed to neutrophils	17.1277	8.63	1	6	6	6	939	100.46	7.44482
Afu1g00460	Afu1g00460 AspGDID:ASPL0000101218 COORDS:Chr1_A_fumigatus_Af293:146969-145247C, translated using codon table 1 (507 amino acids) Uncharacterized ORF; Ortholog(s) have intracellular localization	16.1507	13.41	1	5	5	5	507	55.8111	6.15088
Afu5g02210	Afu5g02210 AspGDID:ASPL0000107401 COORDS:Chr5_A_fumigatus_Af293:565378-563628C, translated using codon table 1 (559 amino acids) Uncharacterized ORF; Ortholog of <i>A. nidulans FGSC A4</i> : AN8034, <i>A. niger CBS 513.88</i> : An02g10730, <i>A. oryzae RIB40</i> : AO090102000294, <i>Aspergillus wentii</i> : Aspwe1_0114775 and <i>Aspergillus sydowii</i> : Aspsy1_0033693	13.6445	10.55	1	4	4	4	559	60.7054	9.48096
Afu7g02310	Afu7g02310 AspGDID:ASPL0000110026 COORDS:Chr7_A_fumigatus_Af293:629238-628529C, translated using codon table 1 (217 amino acids) Uncharacterized ORF; Putative adenine phosphoribosyltransferase 1; transcript induced by exposure to human airway epithelial cells; induced by gliotoxin exposure	12.5598	27.19	1	4	4	4	217	23.6063	6.39209
Afu5g05500	Afu5g05500 AspGDID:ASPL0000107629 COORDS:Chr5_A_fumigatus_Af293:1277444-1278887W, translated using codon table 1 (424 amino acids) Uncharacterized ORF; Ortholog(s) have phosphoglycerate dehydrogenase activity, role in serine family amino acid biosynthetic process and cytosol localization	11.9665	12.03	1	4	4	4	424	45.8868	7.00537
Afu2g02210	Afu2g02210 AspGDID:ASPL0000103051 COORDS:Chr2_A_fumigatus_Af293:557698-558664W, translated using codon table 1 (303 amino acids) Uncharacterized ORF; Ortholog of <i>A. nidulans FGSC A4</i> : AN4600, <i>A. niger CBS 513.88</i> : An07g06630, <i>Aspergillus wentii</i> : Aspwe1_0104597, <i>Aspergillus sydowii</i> : Aspsy1_0180963 and <i>Aspergillus terreus NIH2624</i> : ATET_05692	11.0504	17.49	1	3	3	3	303	32.916	9.51025
Afu5g04410	Afu5g04410 AspGDID:ASPL0000107620 COORDS:Chr5_A_fumigatus_Af293:1197423-1195796C, translated using codon table 1 (521 amino acids) Uncharacterized ORF; Ortholog of <i>A. nidulans FGSC A4</i> : AN11225, <i>Neosartorya fischeri NRRL 181</i> : NFIA_037650, <i>Aspergillus wentii</i> : Aspwe1_0043173 and <i>Aspergillus versicolor</i> : Aspve1_0389199	10.9744	8.45	1	3	3	3	521	58.9417	11.0923
Afu1g05490	Afu1g05490 AspGDID:ASPL0000101717 COORDS:Chr1_A_fumigatus_Af293:1568506-1572348W, translated using codon table 1 (1256 amino acids) Uncharacterized ORF; Ortholog of <i>A. nidulans FGSC A4</i> : AN4072, <i>A. niger CBS 513.88</i> : An18g04300, <i>A. oryzae RIB40</i> : AO090009000396, <i>Aspergillus wentii</i> : Aspwe1_0169302 and <i>Aspergillus sydowii</i> : Aspsy1_0057624	10.6239	4.78	1	4	4	4	1256	139.306	9.31982
Afu4g12350	Afu4g12350 AspGDID:ASPL0000106942 COORDS:Chr4_A_fumigatus_Af293:3234178-3232553C, translated using codon table 1 (499 amino acids) Verified ORF; Ortholog of <i>A. nidulans FGSC A4</i> : AN3664, <i>A. niger CBS 513.88</i> : An01g07660, <i>A. oryzae RIB40</i> : AO090009000437, <i>Aspergillus wentii</i> : Aspwe1_0047309 and <i>Aspergillus sydowii</i> : Aspsy1_1056088	9.98108	6.21	1	3	3	3	499	61.0517	9.11475
Afu6g14170	Afu6g14170 AspGDID:ASPL0000109756 COORDS:Chr6_A_fumigatus_Af293:3608964-3606174C, translated using codon table 1 (877 amino acids) Uncharacterized ORF; Has domain(s) with predicted cation transmembrane transporter activity, role in cation transport, transmembrane transport and integral component of membrane localization	9.51887	4.45	1	3	3	3	877	94.5128	7.53271
Afu2g03580	Afu2g03580 AspGDID:ASPL0000103185 COORDS:Chr2_A_fumigatus_Af293:953968-955580W, translated using codon table 1 (518 amino acids) Uncharacterized ORF; Ortholog(s) have phenylalanine-tRNA ligase activity, role in phenylalanyl-tRNA aminoacylation and cytosol, phenylalanine-tRNA ligase complex localization	9.27485	9.07	1	4	4	4	518	58.509	7.44482
Afu1g15460	Afu1g15460 AspGDID:ASPL0000102611 COORDS:Chr1_A_fumigatus_Af293:4176314-4173471C, translated using codon table 1 (866 amino acids) Uncharacterized ORF; Ortholog of <i>A. nidulans FGSC A4</i> : AN0892, <i>A. niger CBS 513.88</i> : An01g13900, <i>A. oryzae RIB40</i> : AO090005001665, <i>Aspergillus wentii</i> : Aspwe1_0027562 and <i>Aspergillus sydowii</i> : Aspsy1_0138433	8.34201	4.85	1	3	3	3	866	95.2598	9.61279
Afu3g07790	Afu3g07790 AspGDID:ASPL0000105183 COORDS:Chr3_A_fumigatus_Af293:1963894-1965412W, translated using codon table 1 (464 amino acids) Uncharacterized ORF; Argininosuccinate lyase; hypoxia induced protein	8.32098	7.11	1	3	3	3	464	51.8196	6.27783
Afu6g04010	Afu6g04010 AspGDID:ASPL0000108856 COORDS:Chr6_A_fumigatus_Af293:901498-904822W, translated using codon table 1 (962 amino acids) Uncharacterized ORF; Ortholog(s) have importin-alpha export receptor activity, role in cell division, protein export from nucleus and nuclear membrane localization	7.92587	3.53	1	2	2	2	962	108.421	5.37646
Afu4g04550	Afu4g04550 AspGDID:ASPL0000106273 COORDS:Chr4_A_fumigatus_Af293:1282186-1283190W, translated using codon table 1 (204 amino acids) Uncharacterized ORF; Putative phosphoribosyltransferase; protein induced by hydrogen peroxide	7.89783	17.16	1	2	2	2	204	23.1709	5.32568
Afu5g08190	Afu5g08190 AspGDID:ASPL0000107891 COORDS:Chr5_A_fumigatus_Af293:2074402-2073089C, translated using codon table 1 (437 amino acids) Uncharacterized ORF; Ortholog of <i>A. nidulans FGSC A4</i> : AN7717, <i>A. oryzae RIB40</i> : AO090701000736, <i>Aspergillus wentii</i> : Aspwe1_0101496, <i>Aspergillus sydowii</i> : Aspsy1_0046260 and <i>Aspergillus terreus NIH2624</i> : ATET_08307	7.84121	9.15	1	3	3	3	437	48.0122	5.49072
Afu7g02170	cyp8 AspGDID:ASPL0000110012 COORDS:Chr7_A_fumigatus_Af293:582276-583887W, translated using codon table 1 (459 amino acids) Uncharacterized ORF; Putative peptidyl-prolyl cis-trans isomerase with a central RNA recognition motif (RRM)	7.64374	6.75	1	2	2	2	459	52.8668	7.15186
Afu2g11840	cyc8 AspGDID:ASPL0000103898 COORDS:Chr2_A_fumigatus_Af293:3056794-3059852W, translated using codon table 1 (867 amino acids) Verified ORF; Transcriptional corepressor; ortholog of <i>A. nidulans</i> ssnF; calcium induced; mutation causes increased azole sensitivity	7.58259	3.81	1	3	3	3	867	94.5764	6.72705
Afu4g09750	Afu4g09750 AspGDID:ASPL0000106689 COORDS:Chr4_A_fumigatus_Af293:2539039-2539733W, translated using codon table 1 (187 amino acids) Uncharacterized ORF; Ortholog(s) have role in aerobic respiration and mitochondrial nucleoid, mitochondrial ribosome localization	7.31498	18.72	1	2	2	2	187	19.7125	8.73389
Afu2g07520	Afu2g07520 AspGDID:ASPL0000363027 COORDS:Chr2_A_fumigatus_Af293:1926201-1928684W, translated using codon table 1 (614 amino acids) Uncharacterized ORF; Ortholog(s) have aminopeptidase activity, epoxide hydrolase activity, role in cellular lipid metabolic process, protein catabolic process and cytosol, extracellular region, nucleus localization	7.02037	7.33	1	3	3	3	614	69.6784	6.21436
Afu1g02670	Afu1g02670 AspGDID:ASPL0000101437 COORDS:Chr1_A_fumigatus_Af293:776882-775673C, translated using codon table 1 (320 amino acids) Uncharacterized ORF; ARP2/3 complex 34 kDa subunit; hypoxia induced protein	6.13103	7.19	1	2	2	2	320	36.915	6.87354
Afu1g02410	Afu1g02410 AspGDID:ASPL0000101411 COORDS:Chr1_A_fumigatus_Af293:702057-703574W, translated using codon table 1 (469 amino acids) Uncharacterized ORF; Ortholog(s) have ATP-dependent 3'-5' DNA helicase activity, ATP-dependent 5'-3' DNA helicase activity and role in box C/D snoRNP assembly, histone exchange, rRNA processing, regulation of transcription from RNA polymerase II promoter	5.76271	5.33	1	2	2	2	469	51.3145	5.8335
Afu5g12260	tigA AspGDID:ASPL0000108282 COORDS:Chr5_A_fumigatus_Af293:3183118-3184297W, translated using codon table 1 (368 amino acids) Uncharacterized ORF; Putative disulfide isomerase	5.74172	9.78	1	2	2	2	368	40.2289	6.44287
Afu2g04010	tpsB AspGDID:ASPL0000103227 COORDS:Chr2_A_fumigatus_Af293:1094679-1092973C, translated using codon table 1 (479 amino acids) Verified ORF; Putative trehalose-6-phosphate synthase; role in trehalose biosynthesis; expression up during heat shock; hypervirulent in combination with tpsA mutation, in a mouse model of pulmonary infection; predicted gene pair with AFUA_6G12950	5.71954	5.22	2	2	2	2	479	53.7666	7.43018
Afu1g14640	Afu1g14640 AspGDID:ASPL0000102531 COORDS:Chr1_A_fumigatus_Af293:3908846-3907986C, translated using codon table 1 (286 amino acids) Uncharacterized ORF; Ortholog of <i>A. nidulans FGSC A4</i> : AN0805, <i>A. niger CBS 513.88</i> : An01g12640, <i>A. oryzae RIB40</i> : AO090003000485, <i>Aspergillus wentii</i> : Aspwe1_0487250 and <i>Aspergillus sydowii</i> : Aspsy1_0025994	5.53526	5.94	1	2	2	2	286	32.354	9.93506
Afu4g10540	Afu4g10540 AspGDID:ASPL0000106768 COORDS:Chr4_A_fumigatus_Af293:2759234-2756613C, translated using codon table 1 (832 amino acids) Uncharacterized ORF; Ortholog(s) have TFIID-class transcription factor binding, chromatin binding, core promoter binding, lysine-acetylated histone binding activity	5.32656	2.16	1	2	2	2	832	91.6639	5.87158
Afu1g15960	Afu1g15960 AspGDID:ASPL0000102659 COORDS:Chr1_A_fumigatus_Af293:4331468-4333260W, translated using codon table 1 (554 amino acids) Uncharacterized ORF; Ortholog(s) have flavin adenine dinucleotide binding, glutathione transferase activity, glutathione-disulfide reductase activity	4.98229	5.6	1	2	2	2	554	60.0714	8.70459
Afu2g01040	Afu2g01040 AspGDID:ASPL0000102935 COORDS:Chr2_A_fumigatus_Af293:239825-238336C, translated using codon table 1 (379 amino acids) Uncharacterized ORF; Putative formaldehyde dehydrogenase; transcript up-regulated in conidia exposed to neutrophils	4.84171	10.03	1	3	3	3	379	40.0182	7.26904
Afu6g02940	Afu6g02940 AspGDID:ASPL0000108750 COORDS:Chr6_A_fumigatus_Af293:609669-612491W, translated using codon table 1 (897 amino acids) Uncharacterized ORF; Ortholog of <i>A. nidulans FGSC A4</i> : AN8765, <i>A. niger CBS 513.88</i> : An12g07540, <i>A. oryzae RIB40</i> : AO090026000788, <i>Aspergillus wentii</i> : Aspwe1_0148382 and <i>Aspergillus sydowii</i> : Aspsy1_0060048	4.62751	3.23	1	2	2	2	897	97.9594	7.6499
Afu6g02910	argEF AspGDID:ASPL0000108747 COORDS:Chr6_A_fumigatus_Af293:603327-600472C, translated using codon table 1 (906 amino acids) Verified ORF; Mitochondrial bifunctional enzyme with N-acetyl-gamma-glutamyl-phosphate reductase and acetylglutamate kinase activity, catalyzes the second and third step in arginine biosynthesis	4.48615	2.21	1	2	2	2	906	99.3845	8.14795
Afu1g10560	Afu1g10560 AspGDID:ASPL0000102120 COORDS:Chr1_A_fumigatus_Af293:2748690-2746925C, translated using codon table 1 (550 amino acids) Uncharacterized ORF; Ortholog(s) have role in cell division, positive regulation of growth rate, rRNA processing, response to drug, ribosomal subunit export from nucleus and nucleolus localization	4.37318	5.64	1	3	3	3	550	60.7523	5.92236
Afu6g09030	Afu6g09030 AspGDID:ASPL0000109258 COORDS:Chr6_A_fumigatus_Af293:2147557-2146355C, translated using codon table 1 (382 amino acids) Uncharacterized ORF; Ortholog of <i>A. nidulans FGSC A4</i> : AN1773, <i>A. niger CBS 513.88</i> : An11g06790, <i>A. oryzae RIB40</i> : AO090001000581, <i>Aspergillus wentii</i> : Aspwe1_0121600 and <i>Aspergillus sydowii</i> : Aspsy1_0038822	3.55929	7.59	1	2	2	2	382	41.3745	6.69775
Afu3g11640	Afu3g11640 AspGDID:ASPL0000105562 COORDS:Chr3_A_fumigatus_Af293:3058607-3059789W, translated using codon table 1 (368 amino acids) Uncharacterized ORF; Homoserine dehydrogenase; no human homolog	2.36449	4.89	1	2	2	2	368	38.4803	5.87158
Afu7g01840	Afu7g01840 AspGDID:ASPL0000109979 COORDS:Chr7_A_fumigatus_Af293:496331-491364C, translated using codon table 1 (1522 amino acids) Uncharacterized ORF; Ortholog(s) have Golgi apparatus, cell tip, cytoplasmic vesicle, endoplasmic reticulum, plasma membrane localization	2.08115	1.38	1	2	2	2	1522	168.412	6.21436
Afu3g10740	Afu3g10740 AspGDID:ASPL0000105472 COORDS:Chr3_A_fumigatus_Af293:2782828-2781858C, translated using codon table 1 (262 amino acids) Uncharacterized ORF; Putative RAB GTPase with a predicted role in regulation of endocytosis; transcript downregulated in response to amphotericin B	1.96115	7.25	1	2	2	2	262	27.5867	4.84326
Afu5g06340	Afu5g06340 AspGDID:ASPL0000107710 COORDS:Chr5_A_fumigatus_Af293:1527332-1525770C, translated using codon table 1 (436 amino acids) Uncharacterized ORF; Ortholog(s) have cell division site, cytosol, nucleus localization	1.86689	3.44	1	2	2	2	436	49.2957	8.83643
Afu2g03040	Afu2g03040 AspGDID:ASPL0000103133 COORDS:Chr2_A_fumigatus_Af293:787407-788437W, translated using codon table 1 (192 amino acids) Uncharacterized ORF; Ribosomal protein L34	1.65582	9.9	1	2	2	2	192	21.4242	9.49561

## Sheet: SakA GFP CR_15min
Accession	Description	Score	Coverage	# Proteins	# Unique Peptides	# Peptides	# PSMs	# AAs	MW [kDa]	calc. pI
Afu1g12940	sakA AspGDID:ASPL0000102362 COORDS:Chr1_A_fumigatus_Af293:3428181-3429807W, translated using codon table 1 (366 amino acids) Verified ORF; Putative mitogen-activated protein kinase (MAPK) with predicted roles in the osmotic and oxidative stress responses; involved in sensing nitrogen in the medium	262.927	77.32	1	21	21	62	366	41.9334	5.60498
Afu3g06550	Afu3g06550 AspGDID:ASPL0000105066 COORDS:Chr3_A_fumigatus_Af293:1623469-1625008W, translated using codon table 1 (469 amino acids) Uncharacterized ORF; Has domain(s) with predicted phosphatase activity, phosphoserine phosphatase activity and role in L-serine biosynthetic process, metabolic process	170.293	69.08	1	21	21	33	469	51.8419	5.89697
Afu7g02260	Afu7g02260 AspGDID:ASPL0000110021 COORDS:Chr7_A_fumigatus_Af293:610666-608054C, translated using codon table 1 (784 amino acids) Uncharacterized ORF; Ortholog of <i>A. nidulans FGSC A4</i> : AN9087/oefA, <i>A. niger CBS 513.88</i> : An12g00390, <i>A. oryzae RIB40</i> : AO090038000604, <i>Aspergillus wentii</i> : Aspwe1_0113275 and <i>Aspergillus sydowii</i> : Aspsy1_0061396	54.4627	26.02	1	10	10	12	784	84.5043	8.67529
Afu7g01860	sti1 AspGDID:ASPL0000109981 COORDS:Chr7_A_fumigatus_Af293:501500-503455W, translated using codon table 1 (581 amino acids) Verified ORF; Putative heat shock protein; protein levels increase in response to amphotericin B; transcript induced by exposure to human airway epithelial cells; induced by gliotoxin exposure	40.316	22.55	1	9	9	11	581	64.2614	5.57959
Afu2g15760	Afu2g15760 AspGDID:ASPL0000104293 COORDS:Chr2_A_fumigatus_Af293:4162600-4165937W, translated using codon table 1 (1033 amino acids) Uncharacterized ORF; Ortholog(s) have ubiquitin activating enzyme activity, role in mRNA export from nucleus, protein ubiquitination and cytosol, nucleus localization	37.2979	18.1	1	12	12	13	1033	115.146	5.24951
Afu3g10660	erg13 AspGDID:ASPL0000105464 COORDS:Chr3_A_fumigatus_Af293:2760689-2762268W, translated using codon table 1 (460 amino acids) Uncharacterized ORF; Putative hydroxymethyl glutaryl-coenzyme A synthase with a predicted role in ergosterol biosynthesis; SrbA-regulated during hypoxia	37.0668	22.39	1	6	6	7	460	50.7644	6.55127
Afu1g09010	Afu1g09010 AspGDID:ASPL0000101967 COORDS:Chr1_A_fumigatus_Af293:2333751-2335765W, translated using codon table 1 (651 amino acids) Uncharacterized ORF; Ortholog(s) have cytosol localization	34.1843	18.43	1	7	7	8	651	72.8652	7.06396
Afu4g03760	Afu4g03760 AspGDID:ASPL0000106195 COORDS:Chr4_A_fumigatus_Af293:1054642-1057888W, translated using codon table 1 (1060 amino acids) Uncharacterized ORF; Putative glycine dehydrogenase	32.6774	12.55	1	9	9	9	1060	115.13	7.15186
Afu7g03980	Afu7g03980 AspGDID:ASPL0000110093 COORDS:Chr7_A_fumigatus_Af293:893752-895260W, translated using codon table 1 (468 amino acids) Uncharacterized ORF; Ortholog(s) have role in translational initiation and cytosol, eukaryotic 43S preinitiation complex, eukaryotic translation initiation factor 3 complex, eIF3m, nucleus localization	31.5195	20.51	1	8	8	9	468	51.0816	5.05908
Afu3g12100	Afu3g12100 AspGDID:ASPL0000105606 COORDS:Chr3_A_fumigatus_Af293:3178707-3181079W, translated using codon table 1 (694 amino acids) Uncharacterized ORF; Putative trehalase phosphorylase with a predicted role in the glucose-1-phosphate pathway	31.4232	19.88	1	8	8	8	694	78.2557	6.1001
Afu4g03630	erg6 AspGDID:ASPL0000106182 COORDS:Chr4_A_fumigatus_Af293:1025739-1024484C, translated using codon table 1 (377 amino acids) Uncharacterized ORF; Putative sterol 24-C-methyltransferase with a predicted role in ergosterol biosynthesis; transcript downregulated in response to amphotericin B; induced by exposure to artemisinin; SrbA-regulated during hypoxia	30.6557	34.75	1	8	8	8	377	42.5439	6.43018
Afu6g02910	argEF AspGDID:ASPL0000108747 COORDS:Chr6_A_fumigatus_Af293:603327-600472C, translated using codon table 1 (906 amino acids) Verified ORF; Mitochondrial bifunctional enzyme with N-acetyl-gamma-glutamyl-phosphate reductase and acetylglutamate kinase activity, catalyzes the second and third step in arginine biosynthesis	29.2364	13.02	1	9	9	9	906	99.3845	8.14795
Afu6g07940	Afu6g07940 AspGDID:ASPL0000109154 COORDS:Chr6_A_fumigatus_Af293:1837939-1839097W, translated using codon table 1 (318 amino acids) Uncharacterized ORF; Putative lactoylglutathione lyase	28.6093	39.62	1	7	7	7	318	36.5071	6.39209
Afu2g12910	Afu2g12910 AspGDID:ASPL0000104004 COORDS:Chr2_A_fumigatus_Af293:3311664-3309244C, translated using codon table 1 (741 amino acids) Uncharacterized ORF; Ortholog of <i>A. nidulans FGSC A4</i> : AN6264, <i>A. niger CBS 513.88</i> : An02g01620, <i>A. oryzae RIB40</i> : AO090026000343, <i>Aspergillus wentii</i> : Aspwe1_0117790 and <i>Aspergillus sydowii</i> : Aspsy1_0151049	28.0725	12.96	1	6	6	6	741	80.0612	10.0229
Afu3g10310	Afu3g10310 AspGDID:ASPL0000105429 COORDS:Chr3_A_fumigatus_Af293:2671052-2673496W, translated using codon table 1 (743 amino acids) Uncharacterized ORF; Ortholog(s) have acetolactate synthase activity, flavin adenine dinucleotide binding activity, role in isoleucine biosynthetic process, valine biosynthetic process and acetolactate synthase complex, mitochondrion localization	27.672	14.94	1	6	6	6	743	81.4649	8.54346
Afu7g05370	aspB AspGDID:ASPL0000110230 COORDS:Chr7_A_fumigatus_Af293:1290537-1292385W, translated using codon table 1 (463 amino acids) Verified ORF; Putative septin; Yap1-dependent induction in response to hydrogen peroxide; localizes to septa and to rings at the base of developing phialides; hypoxia repressed protein	27.5176	23.76	1	7	8	8	463	52.5207	6.97607
Afu3g13870	nsdD AspGDID:ASPL0000105780 COORDS:Chr3_A_fumigatus_Af293:3674484-3676292W, translated using codon table 1 (493 amino acids) Verified ORF; Putative GATA-type transcriptional activator; required during an early stage of mating; plays a role in resistance toward cell wall stress	27.3795	14	1	5	5	7	493	52.9912	9.26123
Afu5g10570	Afu5g10570 AspGDID:ASPL0000108121 COORDS:Chr5_A_fumigatus_Af293:2705752-2704997C, translated using codon table 1 (154 amino acids) Verified ORF; Cofilin	26.8586	40.91	1	4	4	6	154	17.0176	5.65576
Afu2g07420	sac6 AspGDID:ASPL0000103465 COORDS:Chr2_A_fumigatus_Af293:1889973-1887748C, translated using codon table 1 (646 amino acids) Verified ORF; Putative actin-bundling protein, fimbrin; conidia-enriched protein	26.4228	15.17	1	6	6	7	646	72.4336	6.12549
Afu5g02370	Afu5g02370 AspGDID:ASPL0000107417 COORDS:Chr5_A_fumigatus_Af293:611752-609421C, translated using codon table 1 (686 amino acids) Uncharacterized ORF; Vacuolar ATP synthase catalytic subunit A; hypoxia induced protein; putative essential gene; induced by exposure to human airway epithelial cells	24.9858	12.1	1	4	4	5	686	74.865	6.18896
Afu2g15940	Afu2g15940 AspGDID:ASPL0000104311 COORDS:Chr2_A_fumigatus_Af293:4216706-4215369C, translated using codon table 1 (445 amino acids) Uncharacterized ORF; Cofactor for methionyl-and glutamyl-tRNA synthetases	24.6371	21.12	1	5	5	5	445	47.4928	6.96143
Afu1g06790	Afu1g06790 AspGDID:ASPL0000101847 COORDS:Chr1_A_fumigatus_Af293:1937397-1941009W, translated using codon table 1 (1095 amino acids) Uncharacterized ORF; Ortholog(s) have role in protein import into nucleus, regulation of mitotic cell cycle and cytosol, nuclear membrane, nucleolus localization	23.9023	9.86	1	7	7	7	1095	121.355	4.76709
Afu7g00250	tub2 AspGDID:ASPL0000109824 COORDS:Chr7_A_fumigatus_Af293:70221-71948W, translated using codon table 1 (448 amino acids) Uncharacterized ORF; Tubulin beta-2 subunit; predicted gene pair with AFUA_1G10910 (tubA)	23.5985	18.3	1	2	3	4	448	49.8598	4.98291
Afu1g12250	rcfB AspGDID:ASPL0000102291 COORDS:Chr1_A_fumigatus_Af293:3235631-3234741C, translated using codon table 1 (268 amino acids) Uncharacterized ORF; Mitochondrial hypoxia response domain protein; protein and transcript levels downregulated by caspofungin treatmen	23.4408	30.97	1	4	4	6	268	29.5042	8.85107
Afu5g05500	Afu5g05500 AspGDID:ASPL0000107629 COORDS:Chr5_A_fumigatus_Af293:1277444-1278887W, translated using codon table 1 (424 amino acids) Uncharacterized ORF; Ortholog(s) have phosphoglycerate dehydrogenase activity, role in serine family amino acid biosynthetic process and cytosol localization	21.1572	19.81	1	6	6	6	424	45.8868	7.00537
Afu6g03460	Afu6g03460 AspGDID:ASPL0000108801 COORDS:Chr6_A_fumigatus_Af293:741171-742895W, translated using codon table 1 (574 amino acids) Uncharacterized ORF; Has domain(s) with predicted ATP binding activity	21.0272	13.94	1	4	4	4	574	63.4223	6.13818
Afu3g01580	Afu3g01580 AspGDID:ASPL0000104678 COORDS:Chr3_A_fumigatus_Af293:397771-395356C, translated using codon table 1 (646 amino acids) Uncharacterized ORF; Putative glucose-methanol-choline (GMC) oxidoreductase; protein induced by hydrogen peroxide; hypoxia induced protein; repressed by gliotoxin exposure	20.8859	13.16	1	8	8	8	646	72.1047	7.41553
Afu3g11390	Afu3g11390 AspGDID:ASPL0000105537 COORDS:Chr3_A_fumigatus_Af293:2988245-2989876W, translated using codon table 1 (465 amino acids) Uncharacterized ORF; Ortholog(s) have role in positive regulation of RNA polymerase II transcriptional preinitiation complex assembly, proteasome regulatory particle assembly, ubiquitin-dependent protein catabolic process	20.8166	18.49	1	6	6	6	465	51.5677	5.30029
Afu1g15450	Afu1g15450 AspGDID:ASPL0000102610 COORDS:Chr1_A_fumigatus_Af293:4172637-4171167C, translated using codon table 1 (424 amino acids) Uncharacterized ORF; Ortholog(s) have adenylosuccinate synthase activity, sulfinylpropanyl adenylate synthase activity	20.8072	13.44	1	4	4	5	424	46.6189	6.90283
Afu1g05620	Afu1g05620 AspGDID:ASPL0000101730 COORDS:Chr1_A_fumigatus_Af293:1613252-1615558W, translated using codon table 1 (600 amino acids) Uncharacterized ORF; Ortholog(s) have phenylalanine-tRNA ligase activity, role in cellular response to drug, phenylalanyl-tRNA aminoacylation and cytosol, nucleus, phenylalanine-tRNA ligase complex localization	20.7711	17.83	1	6	6	6	600	67.8031	5.68115
Afu1g04950	glcA AspGDID:ASPL0000101664 COORDS:Chr1_A_fumigatus_Af293:1412013-1410732C, translated using codon table 1 (323 amino acids) Uncharacterized ORF; Ortholog(s) have protein serine/threonine phosphatase activity	20.5677	28.79	1	5	5	6	323	37.0616	5.78271
Afu2g04680	pakA AspGDID:ASPL0000103294 COORDS:Chr2_A_fumigatus_Af293:1275738-1273126C, translated using codon table 1 (815 amino acids) Uncharacterized ORF; Protein serine/threonine kinase; similar to Ste20, a sexual development regulator	20.5558	11.66	1	5	5	5	815	89.6158	9.43701
Afu1g09330	Afu1g09330 AspGDID:ASPL0000101999 COORDS:Chr1_A_fumigatus_Af293:2420356-2421522W, translated using codon table 1 (345 amino acids) Uncharacterized ORF; Ortholog(s) have sequence-specific DNA binding activity and role in translational initiation	20.5133	20.29	1	6	6	6	345	37.1759	4.88135
Afu4g06900	Afu4g06900 AspGDID:ASPL0000106404 COORDS:Chr4_A_fumigatus_Af293:1787004-1789272W, translated using codon table 1 (573 amino acids) Uncharacterized ORF; Ortholog(s) have asparagine synthase (glutamine-hydrolyzing) activity, role in asparagine biosynthetic process and cytosol, nucleus localization	20.4121	17.45	1	6	6	6	573	64.6714	6.29053
Afu2g11475	Afu2g11475 AspGDID:ASPL0000363557 COORDS:Chr2_A_fumigatus_Af293:2956635-2957821W, translated using codon table 1 (305 amino acids) Uncharacterized ORF; Ortholog(s) have role in endocytosis, establishment or maintenance of actin cytoskeleton polarity, vacuole organization and integral component of Golgi membrane localization	19.9824	20.66	1	4	4	5	305	33.5423	5.2749
Afu6g08750	Afu6g08750 AspGDID:ASPL0000109231 COORDS:Chr6_A_fumigatus_Af293:2073566-2071674C, translated using codon table 1 (578 amino acids) Uncharacterized ORF; Ortholog(s) have role in hyphal growth and cytosol, mitochondrion localization	19.8735	12.63	1	4	4	4	578	62.9819	8.17725
Afu3g08980	Afu3g08980 AspGDID:ASPL0000105299 COORDS:Chr3_A_fumigatus_Af293:2294770-2296443W, translated using codon table 1 (536 amino acids) Uncharacterized ORF; Ortholog(s) have threonine synthase activity, role in threonine biosynthetic process and cytosol, nucleus localization	19.6086	18.28	1	6	6	6	536	59.2332	6.20166
Afu3g14540	hsp30 AspGDID:ASPL0000105843 COORDS:Chr3_A_fumigatus_Af293:3853746-3853204C, translated using codon table 1 (180 amino acids) Verified ORF; Putative 30-kilodalton heat shock protein; conidia-enriched protein; protein levels increase in response to amphotericin B and hydrogen peroxide	19.5182	24.44	1	4	4	5	180	20.4503	6.55127
Afu4g11240	aarA AspGDID:ASPL0000106833 COORDS:Chr4_A_fumigatus_Af293:2938272-2942727W, translated using codon table 1 (1425 amino acids) Uncharacterized ORF; Putative alpha-aminoadipate reductase, large subunit, involved in lysine metabolism; predicted essential gene; transcript induced by exposure to human airway epithelial cells	19.4082	5.05	1	5	5	5	1425	157.08	6.07471
Afu3g09030	Afu3g09030 AspGDID:ASPL0000105302 COORDS:Chr3_A_fumigatus_Af293:2303487-2302210C, translated using codon table 1 (310 amino acids) Uncharacterized ORF; Ortholog(s) have role in aerobic respiration, penicillin biosynthetic process and mitochondrial matrix localization	18.7728	15.16	1	3	3	5	310	34.8563	4.65283
Afu1g02980	Afu1g02980 AspGDID:ASPL0000101468 COORDS:Chr1_A_fumigatus_Af293:854826-855623W, translated using codon table 1 (265 amino acids) Uncharacterized ORF; Putative 6-phosphogluconolactonase; calcium downregulated	18.6035	21.13	1	5	5	5	265	28.8198	6.27783
Afu5g11240	Afu5g11240 AspGDID:ASPL0000108183 COORDS:Chr5_A_fumigatus_Af293:2877011-2875843C, translated using codon table 1 (311 amino acids) Uncharacterized ORF; Ortholog(s) have carbonyl reductase (NADPH) activity, oxidoreductase activity, acting on the aldehyde or oxo group of donors, NAD or NADP as acceptor activity and cytosol, nucleus, ribosome localization	18.3708	24.76	1	4	4	4	311	33.6528	8.98291
Afu3g08640	Afu3g08640 AspGDID:ASPL0000105266 COORDS:Chr3_A_fumigatus_Af293:2213730-2212518C, translated using codon table 1 (340 amino acids) Uncharacterized ORF; Ortholog(s) have sequence-specific DNA binding activity and role in cellular response to drug, cellular response to osmotic stress, translational initiation	18.0638	25	1	4	4	4	340	37.6889	6.69775
Afu6g03540	acuE AspGDID:ASPL0000108809 COORDS:Chr6_A_fumigatus_Af293:768975-770805W, translated using codon table 1 (539 amino acids) Verified ORF; Putative malate synthase; protein abundant in conidia	18.0332	13.91	1	6	6	6	539	61.0212	8.11865
Afu6g07540	Afu6g07540 AspGDID:ASPL0000109114 COORDS:Chr6_A_fumigatus_Af293:1715811-1713540C, translated using codon table 1 (548 amino acids) Uncharacterized ORF; Ortholog(s) have chaperonin-containing T-complex localization	18.0236	10.95	1	6	6	6	548	59.8493	5.51611
Afu6g04010	Afu6g04010 AspGDID:ASPL0000108856 COORDS:Chr6_A_fumigatus_Af293:901498-904822W, translated using codon table 1 (962 amino acids) Uncharacterized ORF; Ortholog(s) have importin-alpha export receptor activity, role in cell division, protein export from nucleus and nuclear membrane localization	17.9233	9.25	1	6	6	6	962	108.421	5.37646
Afu3g11640	Afu3g11640 AspGDID:ASPL0000105562 COORDS:Chr3_A_fumigatus_Af293:3058607-3059789W, translated using codon table 1 (368 amino acids) Uncharacterized ORF; Homoserine dehydrogenase; no human homolog	17.812	20.65	1	5	5	5	368	38.4803	5.87158
Afu5g07120	Afu5g07120 AspGDID:ASPL0000107787 COORDS:Chr5_A_fumigatus_Af293:1769812-1771261W, translated using codon table 1 (352 amino acids) Uncharacterized ORF; RNP domain protein; reacts with rabbit immunosera exposed to A. fumigatus conidia	17.6713	25.85	1	5	5	5	352	37.116	9.15869
Afu5g03690	Afu5g03690 AspGDID:ASPL0000107547 COORDS:Chr5_A_fumigatus_Af293:987794-986454C, translated using codon table 1 (424 amino acids) Uncharacterized ORF; Ortholog(s) have phosphatidylinositol transporter activity	17.036	24.53	1	6	6	6	424	46.141	4.84326
Afu1g10970	Afu1g10970 AspGDID:ASPL0000102160 COORDS:Chr1_A_fumigatus_Af293:2865856-2868959W, translated using codon table 1 (955 amino acids) Uncharacterized ORF; Ortholog(s) have cytosol, plasma membrane localization	17.0134	7.43	1	6	6	6	955	106.49	5.70654
Afu5g09400	Afu5g09400 AspGDID:ASPL0000108009 COORDS:Chr5_A_fumigatus_Af293:2418391-2419402W, translated using codon table 1 (294 amino acids) Uncharacterized ORF; Putative carbonyl reductase; transcript up-regulated in conidia exposed to neutrophils	16.5926	16.33	1	4	4	5	294	31.4496	6.30322
Afu5g02360	Afu5g02360 AspGDID:ASPL0000107416 COORDS:Chr5_A_fumigatus_Af293:608651-606106C, translated using codon table 1 (698 amino acids) Uncharacterized ORF; Ortholog(s) have role in hyphal growth, peroxisome organization, vacuole organization and Golgi apparatus localization	16.5696	11.46	1	4	4	4	698	78.1349	8.17725
Afu6g03810	Afu6g03810 AspGDID:ASPL0000108836 COORDS:Chr6_A_fumigatus_Af293:840093-839212C, translated using codon table 1 (255 amino acids) Uncharacterized ORF; Putative mitochondrial ATP synthase D chain; hypoxia induced protein	16.2135	21.96	1	4	4	4	255	28.6782	9.0415
Afu1g11480	Afu1g11480 AspGDID:ASPL0000102211 COORDS:Chr1_A_fumigatus_Af293:3031787-3030921C, translated using codon table 1 (168 amino acids) Uncharacterized ORF; Protein of unknown function; transcript up-regulated in conidia exposed to neutrophils	15.9003	39.88	1	5	5	5	168	18.216	5.52881
Afu1g02150	Afu1g02150 AspGDID:ASPL0000101385 COORDS:Chr1_A_fumigatus_Af293:639645-637892C, translated using codon table 1 (519 amino acids) Uncharacterized ORF; Ortholog(s) have glycerol-3-phosphate dehydrogenase [NAD+] activity and role in NADH oxidation, cell-abiotic substrate adhesion, glycerol biosynthetic process, intracellular accumulation of glycerol	15.8696	11.56	1	4	4	4	519	56.4221	8.19189
Afu4g06690	Afu4g06690 AspGDID:ASPL0000106383 COORDS:Chr4_A_fumigatus_Af293:1733950-1731132C, translated using codon table 1 (859 amino acids) Uncharacterized ORF; Ortholog(s) have nucleotide binding, ribonucleoside-diphosphate reductase activity, thioredoxin disulfide as acceptor activity	15.6174	6.4	1	4	4	4	859	96.0463	6.66846
Afu2g01920	Afu2g01920 AspGDID:ASPL0000103022 COORDS:Chr2_A_fumigatus_Af293:479695-481689W, translated using codon table 1 (664 amino acids) Uncharacterized ORF; Ortholog(s) have cytosol localization	15.546	9.19	1	4	4	4	664	74.2475	7.1958
Afu7g04070	Afu7g04070 AspGDID:ASPL0000110102 COORDS:Chr7_A_fumigatus_Af293:916318-915016C, translated using codon table 1 (369 amino acids) Uncharacterized ORF; Ortholog(s) have 3-deoxy-7-phosphoheptulonate synthase activity, role in aromatic amino acid family biosynthetic process and cytoplasm, nucleus localization	15.4897	14.63	1	3	3	3	369	40.0468	6.7417
Afu3g10300	Afu3g10300 AspGDID:ASPL0000105428 COORDS:Chr3_A_fumigatus_Af293:2667473-2665767C, translated using codon table 1 (524 amino acids) Uncharacterized ORF; Putative galactokinase with a role in galactose catabolism; transcript up-regulated in conidia exposed to neutrophils	15.4555	11.64	1	4	4	4	524	57.6085	6.65381
Afu5g11380	Afu5g11380 AspGDID:ASPL0000108197 COORDS:Chr5_A_fumigatus_Af293:2924786-2923943C, translated using codon table 1 (197 amino acids) Uncharacterized ORF; Putative Rho-GDP dissociation inhibitor; transcript and protein levels increased in response to amphotericin B	15.3506	37.56	1	4	4	4	197	22.3004	5.90967
Afu3g06530	sC AspGDID:ASPL0000105064 COORDS:Chr3_A_fumigatus_Af293:1618981-1616721C, translated using codon table 1 (574 amino acids) Uncharacterized ORF; Putative ATP sulfurylase; sulfate adenylyltransferase; reacts with rabbit immunosera exposed to A. fumigatus conidia; hypoxia repressed protein	15.1818	11.67	1	6	6	6	574	64.2932	7.06396
Afu1g14850	Afu1g14850 AspGDID:ASPL0000102552 COORDS:Chr1_A_fumigatus_Af293:3980051-3981525W, translated using codon table 1 (437 amino acids) Uncharacterized ORF; Putative acyl-coA dehydrogenase with a predicted role in beta oxidation of fatty acids; transcript up-regulated in conidia exposed to neutrophils	15.1648	13.73	1	3	3	3	437	47.4243	6.94678
Afu4g06890	cyp51A AspGDID:ASPL0000106403 COORDS:Chr4_A_fumigatus_Af293:1785331-1783713C, translated using codon table 1 (515 amino acids) Verified ORF; 14-alpha sterol demethylase; commonly mutated in drug resistant isolates; putative ortholog of A. nidulans pdmA; transcript induced by exposure to fluconazole and voriconazole; SrbA-regulated during hypoxia	15.1109	13.59	1	3	3	3	515	58.0308	8.52881
Afu5g05820	Afu5g05820 AspGDID:ASPL0000107659 COORDS:Chr5_A_fumigatus_Af293:1354916-1353658C, translated using codon table 1 (355 amino acids) Uncharacterized ORF; Ortholog(s) have homoserine kinase activity, role in homoserine metabolic process, threonine biosynthetic process and cytoplasm localization	14.9966	22.25	1	6	6	6	355	38.4901	6.7417
Afu3g07680	Afu3g07680 AspGDID:ASPL0000105174 COORDS:Chr3_A_fumigatus_Af293:1941416-1940148C, translated using codon table 1 (422 amino acids) Uncharacterized ORF; Putative ran GTPase activating protein	14.9842	12.09	1	3	3	4	422	46.1998	4.67822
Afu2g10660	mpdA AspGDID:ASPL0000103781 COORDS:Chr2_A_fumigatus_Af293:2727506-2726340C, translated using codon table 1 (388 amino acids) Verified ORF; Putative mannitol-1-phosphate dehydrogenase; conidia-enriched protein; protein induced by heat shock; reacts with rabbit immunosera exposed to conidia; no human homolog	14.9125	14.18	1	3	3	3	388	42.9772	5.89697
Afu6g10470	zpr1 AspGDID:ASPL0000109402 COORDS:Chr6_A_fumigatus_Af293:2596608-2598107W, translated using codon table 1 (475 amino acids) Uncharacterized ORF; Putative zinc finger protein; transcript highly induced during conidial germination	14.8551	11.79	1	4	4	4	475	53.5291	4.66553
Afu5g02750	Afu5g02750 AspGDID:ASPL0000107455 COORDS:Chr5_A_fumigatus_Af293:720857-719993C, translated using codon table 1 (158 amino acids) Uncharacterized ORF; Cytochrome c oxidase subunit Va with a predicted role in oxidative phosphorylation; induced by exposure to artemisinin	14.7924	33.54	1	4	4	4	158	17.9802	5.68115
Afu5g02850	Afu5g02850 AspGDID:ASPL0000107464 COORDS:Chr5_A_fumigatus_Af293:754834-756051W, translated using codon table 1 (324 amino acids) Uncharacterized ORF; Has domain(s) with predicted arylformamidase activity and role in tryptophan catabolic process to kynurenine	14.6773	20.68	1	5	5	6	324	36.303	5.21143
Afu8g05440	atp4 AspGDID:ASPL0000110874 COORDS:Chr8_A_fumigatus_Af293:1265282-1266290W, translated using codon table 1 (274 amino acids) Uncharacterized ORF; Mitochondrial ATPase subunit; hypoxia repressed protein	14.461	20.07	1	4	4	4	274	29.7087	9.34912
Afu1g15860	Afu1g15860 AspGDID:ASPL0000102649 COORDS:Chr1_A_fumigatus_Af293:4290367-4288413C, translated using codon table 1 (591 amino acids) Uncharacterized ORF; Has domain(s) with predicted role in intracellular protein transport, retrograde vesicle-mediated transport, Golgi to ER, transport, vesicle-mediated transport and COPI vesicle coat, clathrin adaptor complex localization	14.422	10.32	1	4	4	4	591	65.3323	5.87158
Afu1g13710	Afu1g13710 AspGDID:ASPL0000102439 COORDS:Chr1_A_fumigatus_Af293:3650512-3647224C, translated using codon table 1 (1064 amino acids) Uncharacterized ORF; Isoleucyl-tRNA synthetase, cytoplasmic	14.2687	5.45	1	4	4	4	1064	122.315	6.43018
Afu1g16480	Afu1g16480 AspGDID:ASPL0000102711 COORDS:Chr1_A_fumigatus_Af293:4473265-4471335C, translated using codon table 1 (508 amino acids) Uncharacterized ORF; Ortholog(s) have mitochondrion localization	14.1967	11.42	1	4	4	4	508	56.9633	7.21045
Afu5g10560	Afu5g10560 AspGDID:ASPL0000108120 COORDS:Chr5_A_fumigatus_Af293:2704203-2703448C, translated using codon table 1 (196 amino acids) Uncharacterized ORF; Cytochrome c oxidase subunit V	14.041	25	1	4	4	4	196	22.1855	9.94971
Afu6g03590	mcsA AspGDID:ASPL0000108814 COORDS:Chr6_A_fumigatus_Af293:783347-784866W, translated using codon table 1 (465 amino acids) Verified ORF; Methylcitrate synthase; catalyses the condensation of propionyl-CoA and oxaloacetate to methylcitrate; conidia-enriched protein; mutants killed more readily by alveolar macrophages and show decreased virulence in mice	13.9273	14.84	1	5	5	5	465	51.3799	8.93896
Afu5g07890	Afu5g07890 AspGDID:ASPL0000107861 COORDS:Chr5_A_fumigatus_Af293:1979250-1978604C, translated using codon table 1 (149 amino acids) Uncharacterized ORF; Putative single-stranded DNA binding protein family member	13.6591	27.52	1	3	3	4	149	16.2432	9.68604
Afu5g00720	Afu5g00720 AspGDID:ASPL0000107256 COORDS:Chr5_A_fumigatus_Af293:204504-203702C, translated using codon table 1 (248 amino acids) Uncharacterized ORF; Has domain(s) with predicted N-acetyltransferase activity	13.6523	20.16	1	4	4	4	248	29.0426	5.32568
Afu8g04810	Afu8g04810 AspGDID:ASPL0000110815 COORDS:Chr8_A_fumigatus_Af293:1104248-1103015C, translated using codon table 1 (336 amino acids) Uncharacterized ORF; Ortholog(s) have role in circadian regulation of gene expression, conidium formation, establishment or maintenance of bipolar cell polarity regulating cell shape and protein phosphorylation, <a href="#GOsection">more</a>	13.3909	8.04	1	2	2	3	336	39.5131	7.31299
Afu4g12850	clxA AspGDID:ASPL0000106991 COORDS:Chr4_A_fumigatus_Af293:3365625-3367567W, translated using codon table 1 (563 amino acids) Verified ORF; Calnexin, ER membrane chaperone involved in folding of glycoproteins directed to the secretory pathway; hypoxia repressed; enriched in dormant conidia	13.1882	7.64	1	4	4	4	563	61.8151	5.07178
Afu5g12570	Afu5g12570 AspGDID:ASPL0000108311 COORDS:Chr5_A_fumigatus_Af293:3257995-3258330W, translated using codon table 1 (83 amino acids) Uncharacterized ORF; Ortholog(s) have RNA binding activity, role in mRNA splicing, via spliceosome and U4/U6 x U5 tri-snRNP complex, U6 snRNP, cytoplasm, nucleolus, small nucleolar ribonucleoprotein complex localization	13.1587	51.81	1	2	2	2	83	9.3466	4.37354
Afu6g06345	Afu6g06345 AspGDID:ASPL0000108995 COORDS:Chr6_A_fumigatus_Af293:1347575-1348344W, translated using codon table 1 (205 amino acids) Uncharacterized ORF; Ortholog(s) have 6,7-dimethyl-8-ribityllumazine synthase activity, role in riboflavin biosynthetic process and mitochondrial intermembrane space, nucleus localization	12.8365	30.24	1	3	3	3	205	21.5393	6.1001
Afu2g03490	Afu2g03490 AspGDID:ASPL0000103178 COORDS:Chr2_A_fumigatus_Af293:921519-923827W, translated using codon table 1 (645 amino acids) Uncharacterized ORF; Putative calcium/calmodulin-dependent protein kinase; calcium induced; transcript induced by exposure to human airway epithelial cells	12.8064	8.68	1	3	3	3	645	72.0815	6.87354
Afu4g11050	Afu4g11050 AspGDID:ASPL0000106815 COORDS:Chr4_A_fumigatus_Af293:2878131-2879794W, translated using codon table 1 (496 amino acids) Uncharacterized ORF; Putative NADH-ubiquinone oxidoreductase, subunit F involved in oxidative phosphorylation; induced by exposure to artemisinin	12.7682	11.29	1	4	4	4	496	54.5252	8.1333
Afu1g08790	Afu1g08790 AspGDID:ASPL0000101945 COORDS:Chr1_A_fumigatus_Af293:2260124-2263969W, translated using codon table 1 (1072 amino acids) Uncharacterized ORF; Ortholog(s) have nuclear export signal receptor activity	12.3322	4.76	1	5	5	5	1072	123.425	5.43994
Afu1g15000	Afu1g15000 AspGDID:ASPL0000102567 COORDS:Chr1_A_fumigatus_Af293:4029547-4031693W, translated using codon table 1 (643 amino acids) Uncharacterized ORF; Putative isopropylmalate synthase; transcript highly induced during conidial germination; SrbA-regulated during hypoxia	12.213	8.09	1	5	5	5	643	71.1504	5.68115
Afu4g12870	Afu4g12870 AspGDID:ASPL0000106993 COORDS:Chr4_A_fumigatus_Af293:3368445-3370387W, translated using codon table 1 (602 amino acids) Uncharacterized ORF; Putative methylmalonate-semialdehyde dehydrogenase; transcript up-regulated in conidia exposed to neutrophils	12.1805	5.32	1	3	3	3	602	63.8246	8.03076
Afu7g02230	Afu7g02230 AspGDID:ASPL0000110018 COORDS:Chr7_A_fumigatus_Af293:599410-600851W, translated using codon table 1 (418 amino acids) Uncharacterized ORF; Ortholog(s) have mRNA binding activity, role in arginine catabolic process, positive regulation of cellular response to oxidative stress, positive regulation of nuclear-transcribed mRNA poly(A) tail shortening and cytosol localization	11.9457	9.57	1	3	3	3	418	44.8172	5.75732
Afu5g10610	rip1 AspGDID:ASPL0000108125 COORDS:Chr5_A_fumigatus_Af293:2715644-2714448C, translated using codon table 1 (298 amino acids) Uncharacterized ORF; Ubiquinol-cytochrome c reductase iron-sulphur subunit precursor with a predicted role in oxidative phosphorylation; hypoxia induced protein; induced by exposure to artemisinin; SrbA-regulated during hypoxia	11.8755	18.79	1	3	3	3	298	32.5887	8.95361
Afu1g10810	Afu1g10810 AspGDID:ASPL0000102144 COORDS:Chr1_A_fumigatus_Af293:2821017-2822416W, translated using codon table 1 (391 amino acids) Uncharacterized ORF; Ortholog(s) have role in calcium ion transport into cytosol and cytosol, plasma membrane localization	11.5905	11	1	3	3	3	391	44.1257	6.96143
Afu5g11560	Afu5g11560 AspGDID:ASPL0000108213 COORDS:Chr5_A_fumigatus_Af293:2965961-2964433C, translated using codon table 1 (439 amino acids) Uncharacterized ORF; Ortholog(s) have ATP binding activity	11.4443	10.71	1	2	2	2	439	47.6211	6.55127
Afu3g13480	Afu3g13480 AspGDID:ASPL0000105743 COORDS:Chr3_A_fumigatus_Af293:3565478-3566600W, translated using codon table 1 (308 amino acids) Uncharacterized ORF; Translation initiation factor 2 alpha subunit	11.403	17.21	1	4	4	4	308	35.014	5.8208
Afu3g09910	Afu3g09910 AspGDID:ASPL0000105389 COORDS:Chr3_A_fumigatus_Af293:2542185-2543380W, translated using codon table 1 (331 amino acids) Uncharacterized ORF; Ortholog(s) have phosphatidylcholine transporter activity and role in Golgi to plasma membrane transport, ascospore formation, mitotic cytokinesis, phospholipid transport, regulation of filamentous growth	11.2925	11.18	1	2	2	3	331	37.3006	5.51611
Afu5g12260	tigA AspGDID:ASPL0000108282 COORDS:Chr5_A_fumigatus_Af293:3183118-3184297W, translated using codon table 1 (368 amino acids) Uncharacterized ORF; Putative disulfide isomerase	11.2332	10.87	1	2	2	3	368	40.2289	6.44287
Afu5g08130	Afu5g08130 AspGDID:ASPL0000107885 COORDS:Chr5_A_fumigatus_Af293:2058746-2057023C, translated using codon table 1 (478 amino acids) Uncharacterized ORF; Ortholog(s) have P-P-bond-hydrolysis-driven protein transmembrane transporter activity, peptide transporter activity, signal sequence binding activity	11.1283	9.83	1	4	4	4	478	52.1877	8.19189
Afu5g01440	Afu5g01440 AspGDID:ASPL0000107324 COORDS:Chr5_A_fumigatus_Af293:377687-376891C, translated using codon table 1 (202 amino acids) Uncharacterized ORF; Ortholog(s) have thioredoxin peroxidase activity, role in cell redox homeostasis, cellular response to oxidative stress, response to metal ion and peroxisome, plasma membrane localization	11.1189	18.81	1	3	3	3	202	21.9364	8.35303
Afu2g09850	Afu2g09850 AspGDID:ASPL0000103701 COORDS:Chr2_A_fumigatus_Af293:2516744-2518045W, translated using codon table 1 (355 amino acids) Uncharacterized ORF; Putative oxidoreductase, 2-nitropropane dioxygenase family; transcript up-regulated in conidia exposed to neutrophils	11.1175	11.27	1	3	3	3	355	37.6787	7.02002
Afu2g01040	Afu2g01040 AspGDID:ASPL0000102935 COORDS:Chr2_A_fumigatus_Af293:239825-238336C, translated using codon table 1 (379 amino acids) Uncharacterized ORF; Putative formaldehyde dehydrogenase; transcript up-regulated in conidia exposed to neutrophils	10.9197	10.82	1	2	2	2	379	40.0182	7.26904
Afu4g09750	Afu4g09750 AspGDID:ASPL0000106689 COORDS:Chr4_A_fumigatus_Af293:2539039-2539733W, translated using codon table 1 (187 amino acids) Uncharacterized ORF; Ortholog(s) have role in aerobic respiration and mitochondrial nucleoid, mitochondrial ribosome localization	10.8702	18.72	1	2	2	2	187	19.7125	8.73389
Afu2g05340	gel4 AspGDID:ASPL0000103358 COORDS:Chr2_A_fumigatus_Af293:1487091-1488862W, translated using codon table 1 (532 amino acids) Verified ORF; Essential 1,3-beta-glucanosyltransferase, GPI-anchored to the plasma membrane; constitutively expressed during hyphal growth; hypoxia induced protein	10.7067	8.27	1	3	3	3	532	57.0832	5.0083
Afu8g07130	Afu8g07130 AspGDID:ASPL0000111039 COORDS:Chr8_A_fumigatus_Af293:1747018-1747937W, translated using codon table 1 (267 amino acids) Verified ORF; AhpC/TSA family thioredoxin peroxidase; conidia-enriched protein; transcript up-regulated in conidia exposed to neutrophils and to human airway epithelial cells	10.646	11.24	1	3	3	3	267	29.5877	9.24658
Afu5g08270	Afu5g08270 AspGDID:ASPL0000107899 COORDS:Chr5_A_fumigatus_Af293:2100834-2100024C, translated using codon table 1 (244 amino acids) Uncharacterized ORF; Putative HAD superfamily hydrolase; hypoxia repressed protein	10.5558	16.8	1	3	3	3	244	27.343	5.04639
Afu1g09280	ptcB AspGDID:ASPL0000101994 COORDS:Chr1_A_fumigatus_Af293:2407312-2409143W, translated using codon table 1 (429 amino acids) Verified ORF; Putative type 2C protein phosphatase (PP2C) involved in dephosphorylation of SakA MAP kinase in response to osmotic stress	10.5412	9.79	1	3	3	3	429	46.5624	4.79248
Afu1g13740	Afu1g13740 AspGDID:ASPL0000102442 COORDS:Chr1_A_fumigatus_Af293:3658931-3663766W, translated using codon table 1 (1578 amino acids) Uncharacterized ORF; Predicted pentafunctional polypeptide; predicted essential gene	10.484	4.44	1	4	4	4	1578	171.364	6.68311
Afu1g15960	Afu1g15960 AspGDID:ASPL0000102659 COORDS:Chr1_A_fumigatus_Af293:4331468-4333260W, translated using codon table 1 (554 amino acids) Uncharacterized ORF; Ortholog(s) have flavin adenine dinucleotide binding, glutathione transferase activity, glutathione-disulfide reductase activity	10.3202	9.03	1	4	4	4	554	60.0714	8.70459
Afu5g07050	Afu5g07050 AspGDID:ASPL0000107780 COORDS:Chr5_A_fumigatus_Af293:1745205-1746800W, translated using codon table 1 (463 amino acids) Uncharacterized ORF; Proteasome regulatory particle subunit; transcript induced by exposure to human airway epithelial cells	10.0503	8.21	1	3	3	3	463	51.4175	5.75732
Afu1g06210	agm1 AspGDID:ASPL0000101789 COORDS:Chr1_A_fumigatus_Af293:1791710-1793700W, translated using codon table 1 (566 amino acids) Verified ORF; N-acetylphosphoglucosamine mutase, involved in chitin biosynthesis; essential	9.99138	9.54	1	4	4	4	566	61.4774	6.11279
Afu6g03750	Afu6g03750 AspGDID:ASPL0000108830 COORDS:Chr6_A_fumigatus_Af293:827896-829831W, translated using codon table 1 (583 amino acids) Uncharacterized ORF; Ortholog(s) have amidophosphoribosyltransferase activity, role in 'de novo' IMP biosynthetic process, adenine metabolic process and cytoplasm localization	9.97455	6	1	2	2	2	583	64.0024	6.58057
Afu2g15070	Afu2g15070 AspGDID:ASPL0000104222 COORDS:Chr2_A_fumigatus_Af293:3981607-3982633W, translated using codon table 1 (280 amino acids) Uncharacterized ORF; Ortholog(s) have polyubiquitin binding, structural molecule activity and role in negative regulation of protein catabolic process, ubiquitin-dependent protein catabolic process	9.957	12.86	1	2	2	2	280	29.984	5.13525
Afu3g08940	Afu3g08940 AspGDID:ASPL0000105295 COORDS:Chr3_A_fumigatus_Af293:2286027-2286949W, translated using codon table 1 (280 amino acids) Uncharacterized ORF; Ortholog(s) have role in ubiquitin-dependent protein catabolic process and nucleus, proteasome regulatory particle, lid subcomplex, proteasome storage granule localization	9.95453	13.21	1	3	3	3	280	31.1431	4.99561
Afu3g11350	arsA AspGDID:ASPL0000105533 COORDS:Chr3_A_fumigatus_Af293:2972476-2973613W, translated using codon table 1 (340 amino acids) Uncharacterized ORF; ATPase; proteins are recognized and bound by Get3p then delivered to the ER	9.91494	10.59	1	2	2	2	340	37.416	5.09717
Afu7g05870	pre8 AspGDID:ASPL0000110279 COORDS:Chr7_A_fumigatus_Af293:1438165-1439254W, translated using codon table 1 (282 amino acids) Uncharacterized ORF; Putative proteasome subunit; immunoreactive protein; reacts with rabbit immunosera exposed to A. fumigatus conidia	9.77933	14.18	1	2	2	2	282	30.4438	5.5542
Afu5g03520	Afu5g03520 AspGDID:ASPL0000107530 COORDS:Chr5_A_fumigatus_Af293:949870-951084W, translated using codon table 1 (323 amino acids) Verified ORF; Immunoreactive secreted protein	9.72958	11.76	1	3	3	3	323	35.4962	6.46826
Afu2g11340	Afu2g11340 AspGDID:ASPL0000103849 COORDS:Chr2_A_fumigatus_Af293:2922123-2921251C, translated using codon table 1 (248 amino acids) Uncharacterized ORF; Ortholog(s) have role in intracellular sterol transport and fungal-type vacuole lumen localization	9.60522	16.13	1	4	4	4	248	27.2728	5.93506
Afu2g05510	Afu2g05510 AspGDID:ASPL0000103374 COORDS:Chr2_A_fumigatus_Af293:1537597-1538232W, translated using codon table 1 (101 amino acids) Uncharacterized ORF; Ortholog(s) have proton-transporting ATP synthase activity, rotational mechanism, proton-transporting ATPase activity, rotational mechanism activity and role in ATP synthesis coupled proton transport	9.42468	31.68	1	3	3	3	101	11.1599	10.4331
Afu5g10640	Afu5g10640 AspGDID:ASPL0000108128 COORDS:Chr5_A_fumigatus_Af293:2721762-2723271W, translated using codon table 1 (391 amino acids) Uncharacterized ORF; Ortholog(s) have tyrosine-tRNA ligase activity, role in tyrosyl-tRNA aminoacylation and cytosol, nucleus localization	9.38658	14.32	1	5	5	5	391	43.5878	6.58057
Afu2g03590	Afu2g03590 AspGDID:ASPL0000103186 COORDS:Chr2_A_fumigatus_Af293:956883-956337C, translated using codon table 1 (88 amino acids) Uncharacterized ORF; Putative ribosomal protein S21e; transcript induced by exposure to human airway epithelial cells	9.30743	36.36	1	3	3	3	88	10.0029	8.30908
Afu8g01670	cat2 AspGDID:ASPL0000110606 COORDS:Chr8_A_fumigatus_Af293:441545-439266C, translated using codon table 1 (759 amino acids) Verified ORF; Putative bifunctional catalase-peroxidase; induction in response to hydrogen peroxide Yap1-dependent; transcript induced by exposure to human airway epithelial cells; SrbA-regulated during hypoxia	9.28091	5.8	1	3	3	3	759	83.7098	6.58057
Afu2g01750	Afu2g01750 AspGDID:ASPL0000103005 COORDS:Chr2_A_fumigatus_Af293:429523-427825C, translated using codon table 1 (461 amino acids) Uncharacterized ORF; Has domain(s) with predicted aminopeptidase activity, metalloexopeptidase activity and role in cellular process, proteolysis	9.14262	7.16	1	2	2	2	461	50.7856	5.96045
Afu3g10630	Afu3g10630 AspGDID:ASPL0000105461 COORDS:Chr3_A_fumigatus_Af293:2747083-2747630W, translated using codon table 1 (123 amino acids) Uncharacterized ORF; Ortholog(s) have mitochondrion localization	9.05274	33.33	1	2	2	2	123	13.5657	4.88135
Afu2g03400	Afu2g03400 AspGDID:ASPL0000103169 COORDS:Chr2_A_fumigatus_Af293:896513-897792W, translated using codon table 1 (335 amino acids) Uncharacterized ORF; Ortholog(s) have ubiquitin-specific protease activity and role in cellular response to drug, mitochondrial fission, peroxisome fission, proteasome-mediated ubiquitin-dependent protein catabolic process, protein deubiquitination	8.99285	11.04	1	3	3	3	335	37.4139	6.20166
Afu2g03580	Afu2g03580 AspGDID:ASPL0000103185 COORDS:Chr2_A_fumigatus_Af293:953968-955580W, translated using codon table 1 (518 amino acids) Uncharacterized ORF; Ortholog(s) have phenylalanine-tRNA ligase activity, role in phenylalanyl-tRNA aminoacylation and cytosol, phenylalanine-tRNA ligase complex localization	8.98297	11.58	1	5	5	5	518	58.509	7.44482
Afu2g15870	Afu2g15870 AspGDID:ASPL0000104304 COORDS:Chr2_A_fumigatus_Af293:4194874-4191631C, translated using codon table 1 (1039 amino acids) Uncharacterized ORF; Ortholog(s) have cytosol, nuclear envelope localization	8.94278	4.33	1	3	3	3	1039	114.292	4.65283
Afu6g12680	Afu6g12680 AspGDID:ASPL0000109611 COORDS:Chr6_A_fumigatus_Af293:3202825-3203845W, translated using codon table 1 (135 amino acids) Uncharacterized ORF; Ortholog(s) have hydrolase activity, role in nucleotide metabolic process and cytoplasm, nucleus localization	8.82332	22.22	1	3	3	3	135	14.9728	6.87354
Afu4g10010	Afu4g10010 AspGDID:ASPL0000106715 COORDS:Chr4_A_fumigatus_Af293:2593720-2595242W, translated using codon table 1 (487 amino acids) Uncharacterized ORF; Ortholog(s) have heat shock protein binding activity, role in protein folding, regulation of mitotic cell cycle and cytosol, nucleus localization	8.82073	7.8	1	2	2	2	487	54.4855	4.99561
Afu8g03920	Afu8g03920 AspGDID:ASPL0000361923 COORDS:Chr8_A_fumigatus_Af293:837589-837167C, translated using codon table 1 (103 amino acids) Uncharacterized ORF; Ortholog(s) have histone binding, protein complex binding, protein homodimerization activity, protein kinase activator activity, ubiquitin binding activity	8.7621	29.13	1	3	3	3	103	12.5234	6.0874
Afu3g13820	Afu3g13820 AspGDID:ASPL0000105775 COORDS:Chr3_A_fumigatus_Af293:3651038-3650223C, translated using codon table 1 (201 amino acids) Uncharacterized ORF; Putative HET-C2 protein; transcript induced by exposure to human airway epithelial cells	8.75737	12.94	1	2	2	2	201	22.1986	6.94678
Afu3g09700	Afu3g09700 AspGDID:ASPL0000105368 COORDS:Chr3_A_fumigatus_Af293:2482012-2478686C, translated using codon table 1 (1019 amino acids) Uncharacterized ORF; Ortholog(s) have cytosol localization	8.56555	3.43	1	2	2	2	1019	110.14	6.66846
Afu4g03650	Afu4g03650 AspGDID:ASPL0000106184 COORDS:Chr4_A_fumigatus_Af293:1028974-1030431W, translated using codon table 1 (446 amino acids) Uncharacterized ORF; Ribosome associated DnaJ chaperone Zuotin	8.37671	8.3	1	3	3	3	446	51.2243	8.19189
Afu8g05530	osm1 AspGDID:ASPL0000110883 COORDS:Chr8_A_fumigatus_Af293:1293416-1295561W, translated using codon table 1 (630 amino acids) Verified ORF; Putative fumarate reductase; conidia-enriched protein; hypoxia repressed protein; transcript up-regulated in conidia exposed to neutrophils; transcript downregulated in response to hypoxia	8.29271	5.56	1	2	2	2	630	67.8497	7.51807
Afu8g04340	Afu8g04340 AspGDID:ASPL0000110769 COORDS:Chr8_A_fumigatus_Af293:975505-974078C, translated using codon table 1 (412 amino acids) Uncharacterized ORF; Putative cystathionine gamma-lyase; transcript induced by exposure to human airway epithelial cells	8.28026	7.77	1	2	2	2	412	43.628	6.80029
Afu6g06580	Afu6g06580 AspGDID:ASPL0000109019 COORDS:Chr6_A_fumigatus_Af293:1433532-1432446C, translated using codon table 1 (269 amino acids) Uncharacterized ORF; Ortholog(s) have phosphomannomutase activity, role in ER to Golgi vesicle-mediated transport, establishment or maintenance of cell polarity, nuclear envelope organization, protein targeting to ER and cytosol, nucleus localization	8.22334	10.04	1	3	3	3	269	30.5733	5.66846
Afu5g09910	Afu5g09910 AspGDID:ASPL0000108059 COORDS:Chr5_A_fumigatus_Af293:2564144-2563392C, translated using codon table 1 (217 amino acids) Uncharacterized ORF; Putative p-nitroreductase family protein; protein induced by heat shock; Yap1-dependent induction in response to hydrogen peroxide; induced by gliotoxin exposure	8.17438	15.21	1	3	3	3	217	24.2985	5.90967
Afu7g01840	Afu7g01840 AspGDID:ASPL0000109979 COORDS:Chr7_A_fumigatus_Af293:496331-491364C, translated using codon table 1 (1522 amino acids) Uncharacterized ORF; Ortholog(s) have Golgi apparatus, cell tip, cytoplasmic vesicle, endoplasmic reticulum, plasma membrane localization	8.15996	4.99	1	4	4	4	1522	168.412	6.21436
Afu5g07000	Afu5g07000 AspGDID:ASPL0000107775 COORDS:Chr5_A_fumigatus_Af293:1735022-1736346W, translated using codon table 1 (360 amino acids) Uncharacterized ORF; Puttaive NAD binding Rossmann fold oxidoreductase; transcript up-regulated in conidia exposed to neutrophils	8.15409	11.11	1	3	3	3	360	39.9447	7.03467
Afu2g10620	Afu2g10620 AspGDID:ASPL0000103777 COORDS:Chr2_A_fumigatus_Af293:2721682-2719389C, translated using codon table 1 (637 amino acids) Uncharacterized ORF; Ortholog(s) have protein serine/threonine kinase activity	8.1494	6.44	1	2	2	2	637	70.882	7.6499
Afu5g07300	Afu5g07300 AspGDID:ASPL0000107804 COORDS:Chr5_A_fumigatus_Af293:1814759-1815768W, translated using codon table 1 (260 amino acids) Uncharacterized ORF; Electron transfer flavoprotein, beta subunit	8.07278	10	1	2	2	2	260	28.2232	8.96826
Afu6g04970	Afu6g04970 AspGDID:ASPL0000108951 COORDS:Chr6_A_fumigatus_Af293:1181194-1182540W, translated using codon table 1 (428 amino acids) Uncharacterized ORF; Ortholog(s) have O-phospho-L-serine:2-oxoglutarate aminotransferase activity, role in L-serine biosynthetic process, purine nucleobase biosynthetic process and cytosol localization	8.06065	8.41	1	2	2	2	428	46.8644	6.81494
Afu2g06000	Afu2g06000 AspGDID:ASPL0000103423 COORDS:Chr2_A_fumigatus_Af293:1696635-1700101W, translated using codon table 1 (1093 amino acids) Uncharacterized ORF; Putative NAD+ dependent glutamate dehydrogenase; transcript induced during conidial germination	8.00522	5.4	1	4	4	4	1093	123.281	6.55127
Afu6g09330	Afu6g09330 AspGDID:ASPL0000109287 COORDS:Chr6_A_fumigatus_Af293:2227723-2229437W, translated using codon table 1 (468 amino acids) Uncharacterized ORF; Protein of unknown function	7.92675	8.76	1	3	3	3	468	54.5045	5.021
Afu2g08970	Afu2g08970 AspGDID:ASPL0000103615 COORDS:Chr2_A_fumigatus_Af293:2301289-2299406C, translated using codon table 1 (519 amino acids) Uncharacterized ORF; Ortholog(s) have cytosol localization	7.91387	5.39	1	2	2	2	519	55.0988	5.97314
Afu2g14060	Afu2g14060 AspGDID:ASPL0000104121 COORDS:Chr2_A_fumigatus_Af293:3677571-3676423C, translated using codon table 1 (309 amino acids) Uncharacterized ORF; Ortholog(s) have endoplasmic reticulum, plasma membrane localization	7.90121	11.33	1	3	3	3	309	33.7787	8.35303
Afu1g09970	Afu1g09970 AspGDID:ASPL0000102063 COORDS:Chr1_A_fumigatus_Af293:2578608-2579924W, translated using codon table 1 (365 amino acids) Uncharacterized ORF; Ortholog(s) have role in ascospore formation, cellular response to cadmium ion, detoxification of cadmium ion	7.73667	12.33	1	3	3	3	365	40.9887	6.3667
Afu4g07910	Afu4g07910 AspGDID:ASPL0000106506 COORDS:Chr4_A_fumigatus_Af293:2067034-2063752C, translated using codon table 1 (1065 amino acids) Uncharacterized ORF; Putative zinc-dependent peptidase	7.7066	3.1	1	2	2	2	1065	118.489	5.64307
Afu6g04790	Afu6g04790 AspGDID:ASPL0000108933 COORDS:Chr6_A_fumigatus_Af293:1122936-1123878W, translated using codon table 1 (262 amino acids) Uncharacterized ORF; Ortholog(s) have role in proteasomal ubiquitin-independent protein catabolic process, proteasome-mediated ubiquitin-dependent protein catabolic process	7.64904	12.21	1	3	3	3	262	28.7374	5.2749
Afu2g10920	Afu2g10920 AspGDID:ASPL0000103807 COORDS:Chr2_A_fumigatus_Af293:2813917-2812855C, translated using codon table 1 (294 amino acids) Uncharacterized ORF; Putative enoyl-CoA hydratase/isomerase family protein with a predicted role in beta oxidation of fatty acids; transcript up-regulated in conidia exposed to neutrophils	7.50769	12.93	1	3	3	3	294	31.5663	8.55811
Afu1g04890	Afu1g04890 AspGDID:ASPL0000101658 COORDS:Chr1_A_fumigatus_Af293:1385941-1386519W, translated using codon table 1 (127 amino acids) Uncharacterized ORF; Ortholog(s) have ARF guanyl-nucleotide exchange factor activity, role in SRP-dependent cotranslational protein targeting to membrane and Ssh1 translocon complex localization	7.48011	33.86	1	2	2	2	127	12.6777	11.3999
Afu2g08280	maeA AspGDID:ASPL0000103547 COORDS:Chr2_A_fumigatus_Af293:2135230-2132931C, translated using codon table 1 (661 amino acids) Uncharacterized ORF; Putative NADP-dependent malic enzyme	7.45233	5.75	1	2	2	2	661	72.787	6.80029
Afu1g06190	rmtA AspGDID:ASPL0000101787 COORDS:Chr1_A_fumigatus_Af293:1789312-1787900C, translated using codon table 1 (353 amino acids) Uncharacterized ORF; Histone H4 arginine methyltransferase	7.44497	6.8	1	2	2	2	353	40.258	5.2749
Afu2g06040	Afu2g06040 AspGDID:ASPL0000103427 COORDS:Chr2_A_fumigatus_Af293:1706686-1708648W, translated using codon table 1 (612 amino acids) Uncharacterized ORF; Putative actin cortical patch component	7.3851	4.9	1	2	2	2	612	65.1426	6.41748
Afu1g02070	Afu1g02070 AspGDID:ASPL0000101377 COORDS:Chr1_A_fumigatus_Af293:611102-612423W, translated using codon table 1 (319 amino acids) Uncharacterized ORF; Cytochrome C1	7.29642	9.09	1	2	2	2	319	35.1036	8.22119
Afu6g10610	Afu6g10610 AspGDID:ASPL0000109416 COORDS:Chr6_A_fumigatus_Af293:2625814-2626707W, translated using codon table 1 (272 amino acids) Uncharacterized ORF; Putative ribose 5-phosphate isomerase A	7.26463	13.6	1	3	3	3	272	28.359	6.25244
Afu6g09070	Afu6g09070 AspGDID:ASPL0000109262 COORDS:Chr6_A_fumigatus_Af293:2156209-2154962C, translated using codon table 1 (415 amino acids) Uncharacterized ORF; 3'(2'),5';-bisphosphate nucleotidase; hypoxia repressed protein; predicted essential gene	7.24063	7.71	1	3	3	3	415	44.1318	5.8335
Afu6g07760	Afu6g07760 AspGDID:ASPL0000109136 COORDS:Chr6_A_fumigatus_Af293:1770437-1772048W, translated using codon table 1 (492 amino acids) Uncharacterized ORF; Ortholog(s) have structural molecule activity	7.16637	6.3	1	2	2	2	492	54.4651	6.49365
Afu1g09470	Afu1g09470 AspGDID:ASPL0000102013 COORDS:Chr1_A_fumigatus_Af293:2448655-2447399C, translated using codon table 1 (386 amino acids) Uncharacterized ORF; Putative class V aminotransferase; transcript up-regulated in conidia exposed to neutrophils	7.13354	6.99	1	2	2	2	386	41.8237	6.96143
Afu1g09840	tim44 AspGDID:ASPL0000102050 COORDS:Chr1_A_fumigatus_Af293:2554479-2552871C, translated using codon table 1 (515 amino acids) Uncharacterized ORF; Mitochondrial inner membrane translocase subunit	7.09724	6.21	1	2	2	2	515	57.7095	9.11475
Afu4g07340	Afu4g07340 AspGDID:ASPL0000106448 COORDS:Chr4_A_fumigatus_Af293:1905396-1909011W, translated using codon table 1 (1088 amino acids) Uncharacterized ORF; Ortholog(s) have cytoplasm, nucleus localization	6.94057	2.48	1	2	2	2	1088	124.123	5.49072
Afu2g14210	ilv3 AspGDID:ASPL0000104136 COORDS:Chr2_A_fumigatus_Af293:3721264-3723226W, translated using codon table 1 (606 amino acids) Verified ORF; Putative mitochondrial dihydroxy acid dehydratase; hypoxia induced protein; induced by exposure to human airway epithelial cells; required for virulence	6.91514	4.13	1	2	2	2	606	64.7161	7.6499
Afu2g09310	Afu2g09310 AspGDID:ASPL0000103649 COORDS:Chr2_A_fumigatus_Af293:2382162-2382540W, translated using codon table 1 (71 amino acids) Uncharacterized ORF; Has domain(s) with predicted proton-transporting ATP synthase activity, rotational mechanism, proton-transporting ATPase activity, rotational mechanism activity and role in ATP synthesis coupled proton transport	6.87732	30.99	1	2	2	2	71	7.85714	10.4185
Afu5g02090	Afu5g02090 AspGDID:ASPL0000107389 COORDS:Chr5_A_fumigatus_Af293:531520-531007C, translated using codon table 1 (144 amino acids) Uncharacterized ORF; Ortholog(s) have role in meiotic chromosome segregation and cytosol, nucleus localization	6.83156	18.75	1	2	2	2	144	16.3113	7.50342
Afu3g10700	Afu3g10700 AspGDID:ASPL0000105468 COORDS:Chr3_A_fumigatus_Af293:2775082-2775739W, translated using codon table 1 (193 amino acids) Uncharacterized ORF; Ortholog(s) have mRNA binding, structural molecule activity and role in Arp2/3 complex-mediated actin nucleation, actin cortical patch assembly, cellular response to drug, mitochondrion inheritance	6.75279	13.47	1	2	2	2	193	20.5543	5.60498
Afu6g08920	Afu6g08920 AspGDID:ASPL0000109248 COORDS:Chr6_A_fumigatus_Af293:2125824-2122684C, translated using codon table 1 (1046 amino acids) Uncharacterized ORF; Assimilatory sulfite reductase	6.719	2.58	1	2	2	2	1046	114.548	5.13525
Afu3g11170	Afu3g11170 AspGDID:ASPL0000105515 COORDS:Chr3_A_fumigatus_Af293:2928974-2931529W, translated using codon table 1 (759 amino acids) Uncharacterized ORF; Ortholog(s) have sequence-specific DNA binding activity and role in carotenoid biosynthetic process, circadian rhythm, conidiophore development	6.67132	3.95	1	2	2	2	759	84.1513	6.7124
Afu3g11300	prs2 AspGDID:ASPL0000105528 COORDS:Chr3_A_fumigatus_Af293:2959483-2958408C, translated using codon table 1 (254 amino acids) Uncharacterized ORF; Putative proteasome component	6.64891	8.66	1	2	2	2	254	27.9201	6.37939
Afu4g11260	Afu4g11260 AspGDID:ASPL0000106835 COORDS:Chr4_A_fumigatus_Af293:2946536-2947803W, translated using codon table 1 (352 amino acids) Uncharacterized ORF; Ortholog(s) have role in cellular response to cadmium ion, detoxification of cadmium ion and cytosol, nucleus localization	6.64762	9.38	1	2	2	2	352	39.9157	7.54736
Afu5g05550	Afu5g05550 AspGDID:ASPL0000107633 COORDS:Chr5_A_fumigatus_Af293:1292269-1297322W, translated using codon table 1 (1572 amino acids) Uncharacterized ORF; Class V myosin; transcript induced by exposure to human airway epithelial cells	6.6304	1.97	1	2	2	2	1572	179.848	6.91748
Afu2g13720	Afu2g13720 AspGDID:ASPL0000104087 COORDS:Chr2_A_fumigatus_Af293:3562458-3563730W, translated using codon table 1 (374 amino acids) Uncharacterized ORF; Ortholog(s) have RNA polymerase I activity, RNA polymerase III activity	6.62459	8.82	1	2	2	2	374	42.3207	6.55127
Afu6g06350	Afu6g06350 AspGDID:ASPL0000108996 COORDS:Chr6_A_fumigatus_Af293:1349712-1348557C, translated using codon table 1 (298 amino acids) Uncharacterized ORF; Proteasome subunit alpha type 3; reacts with rabbit immunosera exposed to A. fumigatus conidia	6.55754	11.41	1	3	3	3	298	31.8111	5.21143
Afu4g14380	Afu4g14380 AspGDID:ASPL0000107143 COORDS:Chr4_A_fumigatus_Af293:3803235-3802361C, translated using codon table 1 (266 amino acids) Verified ORF; Protein of unknown function; transcript downregulated in response to voriconazole	6.46305	9.77	1	2	2	2	266	29.9935	7.86963
Afu3g12530	pkhB AspGDID:ASPL0000105649 COORDS:Chr3_A_fumigatus_Af293:3318837-3312900C, translated using codon table 1 (1937 amino acids) Uncharacterized ORF; Putative sensor histidine kinase/response regulator; transcript induced by exposure to human airway epithelial cells	6.43868	1.08	1	2	2	2	1937	213.382	6.52197
Afu2g02780	Afu2g02780 AspGDID:ASPL0000103108 COORDS:Chr2_A_fumigatus_Af293:722347-721173C, translated using codon table 1 (355 amino acids) Uncharacterized ORF; Ortholog(s) have mRNA binding activity, role in negative regulation of MAPK cascade and cytosol localization	6.38165	7.32	1	2	2	2	355	37.8871	6.18896
Afu7g06010	Afu7g06010 AspGDID:ASPL0000110293 COORDS:Chr7_A_fumigatus_Af293:1472458-1471853C, translated using codon table 1 (182 amino acids) Uncharacterized ORF; Ortholog(s) have mitochondrion localization	6.35112	17.58	1	2	2	2	182	19.5816	9.70068
Afu1g02110	Afu1g02110 AspGDID:ASPL0000101381 COORDS:Chr1_A_fumigatus_Af293:621945-623264W, translated using codon table 1 (376 amino acids) Uncharacterized ORF; 3-deoxy-7-phosphoheptulonate synthase; no human homolog	6.32606	9.04	1	2	2	2	376	40.89	6.85889
Afu5g10650	Afu5g10650 AspGDID:ASPL0000108129 COORDS:Chr5_A_fumigatus_Af293:2725117-2723747C, translated using codon table 1 (412 amino acids) Uncharacterized ORF; Has domain(s) with predicted FMN binding, oxidoreductase activity, oxidoreductase activity, acting on the CH-NH2 group of donors, pyridoxamine-phosphate oxidase activity	6.16345	7.04	1	2	2	2	412	45.9339	6.25244
Afu6g12500	Afu6g12500 AspGDID:ASPL0000109594 COORDS:Chr6_A_fumigatus_Af293:3156604-3155495C, translated using codon table 1 (220 amino acids) Uncharacterized ORF; Ortholog(s) have cytosol, mitochondrion, nucleus localization	6.13927	9.09	1	2	2	2	220	23.7052	8.38232
Afu4g08600	Afu4g08600 AspGDID:ASPL0000106573 COORDS:Chr4_A_fumigatus_Af293:2225523-2227284W, translated using codon table 1 (550 amino acids) Uncharacterized ORF; Putative aldehyde dehydrogenase (NAD(P)+)	6.12079	6.91	1	3	3	3	550	60.0219	6.96143
Afu2g12180	Afu2g12180 AspGDID:ASPL0000103932 COORDS:Chr2_A_fumigatus_Af293:3139671-3138380C, translated using codon table 1 (327 amino acids) Uncharacterized ORF; Ortholog(s) have Golgi apparatus, endoplasmic reticulum, fungal-type vacuole membrane localization	6.09859	10.7	1	2	2	2	327	36.175	8.60205
Afu4g08110	Afu4g08110 AspGDID:ASPL0000106525 COORDS:Chr4_A_fumigatus_Af293:2109318-2106680C, translated using codon table 1 (802 amino acids) Uncharacterized ORF; Ortholog(s) have role in mitochondrial translation and mitochondrion localization	6.01418	3.87	1	2	2	2	802	89.1633	6.771
Afu4g10780	Afu4g10780 AspGDID:ASPL0000106791 COORDS:Chr4_A_fumigatus_Af293:2806494-2819008W, translated using codon table 1 (4039 amino acids) Uncharacterized ORF; Ortholog(s) have role in mRNA export from nucleus and nucleus localization	6.00607	0.72	1	3	3	3	4039	450.543	4.99561
Afu2g14960	Afu2g14960 AspGDID:ASPL0000104211 COORDS:Chr2_A_fumigatus_Af293:3942076-3942959W, translated using codon table 1 (271 amino acids) Uncharacterized ORF; Ortholog(s) have RNA polymerase II activating transcription factor binding, disulfide oxidoreductase activity	5.96894	7.38	1	2	2	2	271	28.7907	4.90674
Afu3g06140	Afu3g06140 AspGDID:ASPL0000105025 COORDS:Chr3_A_fumigatus_Af293:1516711-1520611W, translated using codon table 1 (1043 amino acids) Uncharacterized ORF; Ortholog(s) have role in G1 to G0 transition, actin filament organization, activation of bipolar cell growth, cellular protein localization and cellular response to nitrogen starvation, <a href="#GOsection">more</a>	5.8526	2.78	1	2	2	2	1043	118.311	5.59229
Afu3g06110	Afu3g06110 AspGDID:ASPL0000105022 COORDS:Chr3_A_fumigatus_Af293:1507370-1509490W, translated using codon table 1 (638 amino acids) Uncharacterized ORF; Has domain(s) with predicted enzyme regulator activity, role in regulation of protein catabolic process and proteasome complex localization	5.79613	4.55	1	2	2	2	638	70.7152	7.15186
Afu5g12890	Afu5g12890 AspGDID:ASPL0000108343 COORDS:Chr5_A_fumigatus_Af293:3381478-3379940C, translated using codon table 1 (512 amino acids) Uncharacterized ORF; Ortholog of <i>A. nidulans FGSC A4</i> : AN6826, <i>A. niger CBS 513.88</i> : An14g06450, <i>A. oryzae RIB40</i> : AO090120000402, <i>Aspergillus wentii</i> : Aspwe1_0058891 and <i>Aspergillus sydowii</i> : Aspsy1_0143996	5.75455	4.1	1	2	2	2	512	59.9216	5.35107
Afu6g06500	Afu6g06500 AspGDID:ASPL0000109011 COORDS:Chr6_A_fumigatus_Af293:1401790-1403080W, translated using codon table 1 (363 amino acids) Uncharacterized ORF; Actin-related protein 2/3 complex subunit 1A; transcript up-regulated in conidia exposed to neutrophils	5.63217	5.79	1	2	2	2	363	39.959	7.03467
Afu1g09930	gcy1 AspGDID:ASPL0000102059 COORDS:Chr1_A_fumigatus_Af293:2570399-2571627W, translated using codon table 1 (349 amino acids) Uncharacterized ORF; Putative glycerol dehydrogenase; protein level decreases upon heat shock; transcript up-regulated in conidia exposed to neutrophils	5.526	8.88	1	2	2	2	349	39.1061	8.83643
Afu6g08810	Afu6g08810 AspGDID:ASPL0000109237 COORDS:Chr6_A_fumigatus_Af293:2088713-2087744C, translated using codon table 1 (285 amino acids) Uncharacterized ORF; Ortholog(s) have role in ascospore formation, mitochondrial respiratory chain complex I assembly, programmed cell death and mitochondrion, plasma membrane localization	5.4522	12.98	1	2	2	2	285	32.5615	8.29443
Afu1g03490	Afu1g03490 AspGDID:ASPL0000101519 COORDS:Chr1_A_fumigatus_Af293:1008179-1009455W, translated using codon table 1 (373 amino acids) Uncharacterized ORF; Has domain(s) with predicted catalytic activity, coenzyme binding activity and role in cellular metabolic process	5.3441	6.43	1	2	2	2	373	42.1384	6.26514
Afu4g10020	Afu4g10020 AspGDID:ASPL0000106716 COORDS:Chr4_A_fumigatus_Af293:2596776-2595828C, translated using codon table 1 (242 amino acids) Uncharacterized ORF; Ortholog(s) have Golgi apparatus, cytoplasmic vesicle localization	5.29444	7.02	1	2	2	2	242	26.0718	4.60205
Afu5g08050	Afu5g08050 AspGDID:ASPL0000107877 COORDS:Chr5_A_fumigatus_Af293:2042382-2039865C, translated using codon table 1 (654 amino acids) Uncharacterized ORF; Putative aminopeptidase P	5.10091	5.35	1	2	2	2	654	72.6344	6.34131
Afu5g09860	Afu5g09860 AspGDID:ASPL0000108054 COORDS:Chr5_A_fumigatus_Af293:2552613-2551525C, translated using codon table 1 (287 amino acids) Uncharacterized ORF; Putative esterase	5.08044	7.67	1	2	2	2	287	31.5205	6.72705
Afu1g02670	Afu1g02670 AspGDID:ASPL0000101437 COORDS:Chr1_A_fumigatus_Af293:776882-775673C, translated using codon table 1 (320 amino acids) Uncharacterized ORF; ARP2/3 complex 34 kDa subunit; hypoxia induced protein	5.06774	6.56	1	2	2	2	320	36.915	6.87354
Afu6g05080	Afu6g05080 AspGDID:ASPL0000108963 COORDS:Chr6_A_fumigatus_Af293:1206219-1207208W, translated using codon table 1 (293 amino acids) Uncharacterized ORF; Ortholog(s) have cytosol, nucleus localization	4.91347	9.56	1	2	2	2	293	32.3697	6.44287
Afu3g06210	Afu3g06210 AspGDID:ASPL0000105032 COORDS:Chr3_A_fumigatus_Af293:1533290-1534337W, translated using codon table 1 (299 amino acids) Uncharacterized ORF; Putative phosphoribosylaminoimidazole-succinocarboxamidesynthase	4.8285	6.02	1	2	2	2	299	33.2403	5.74463
Afu6g08300	Afu6g08300 AspGDID:ASPL0000109187 COORDS:Chr6_A_fumigatus_Af293:1940980-1944815W, translated using codon table 1 (1235 amino acids) Uncharacterized ORF; Ortholog(s) have role in regulation of circadian rhythm	4.68987	1.86	1	2	2	2	1235	138.512	8.92432
Afu5g10120	Afu5g10120 AspGDID:ASPL0000108078 COORDS:Chr5_A_fumigatus_Af293:2603086-2606910W, translated using codon table 1 (1274 amino acids) Uncharacterized ORF; Protein similar to nonribosomal peptide synthases (NRPS-like), encoded in a predicted secondary metabolite gene cluster	4.68575	2.75	1	3	3	3	1274	137.062	6.31592
Afu6g00660	Afu6g00660 AspGDID:ASPL0000108620 COORDS:Chr6_A_fumigatus_Af293:170160-171220W, translated using codon table 1 (322 amino acids) Uncharacterized ORF; Ortholog(s) have role in asperthecin biosynthetic process	4.66282	6.21	1	2	2	2	322	35.7539	5.51611
Afu5g11210	Afu5g11210 AspGDID:ASPL0000108181 COORDS:Chr5_A_fumigatus_Af293:2865298-2866520W, translated using codon table 1 (331 amino acids) Uncharacterized ORF; Ortholog(s) have cytoplasm, nucleus localization	3.89026	7.25	1	2	2	2	331	36.565	7.28369
Afu6g12530	Afu6g12530 AspGDID:ASPL0000109596 COORDS:Chr6_A_fumigatus_Af293:3161896-3164722W, translated using codon table 1 (767 amino acids) Uncharacterized ORF; Ortholog(s) have cytosol localization	3.61999	4.3	1	2	2	2	767	85.6993	4.84326
Afu6g11620	Afu6g11620 AspGDID:ASPL0000109511 COORDS:Chr6_A_fumigatus_Af293:2883600-2884478W, translated using codon table 1 (292 amino acids) Uncharacterized ORF; Formyltetrahydrofolate deformylase	3.54906	9.25	1	2	2	2	292	32.2338	7.45947
Afu2g02150	S10a AspGDID:ASPL0000103045 COORDS:Chr2_A_fumigatus_Af293:536724-537226W, translated using codon table 1 (116 amino acids) Uncharacterized ORF; Putative ribosomal protein S10	3.19483	16.38	1	2	2	2	116	13.0562	9.71533
Afu5g05680	Afu5g05680 AspGDID:ASPL0000107645 COORDS:Chr5_A_fumigatus_Af293:1322763-1324274W, translated using codon table 1 (464 amino acids) Uncharacterized ORF; Ortholog(s) have translation release factor activity, codon specific activity and role in asexual sporulation resulting in formation of a cellular spore, cellular response to nitrogen starvation, cytokinesis, translational termination	2.2636	4.96	1	2	2	2	464	51.8989	6.48096
Afu2g09180	Afu2g09180 AspGDID:ASPL0000103636 COORDS:Chr2_A_fumigatus_Af293:2354314-2353640C, translated using codon table 1 (201 amino acids) Uncharacterized ORF; Ortholog(s) have role in retrograde vesicle-mediated transport, Golgi to ER and COPI vesicle coat, cytosol, nucleus localization	2.13753	8.46	1	2	2	2	201	21.9153	4.80518
Afu6g02140	cyp1 AspGDID:ASPL0000108669 COORDS:Chr6_A_fumigatus_Af293:370211-369612C, translated using codon table 1 (161 amino acids) Uncharacterized ORF; Putative cyclophilin; peptidyl-prolyl cis-trans isomerase-like protein	1.72716	13.66	1	2	2	2	161	17.7128	7.04932
Afu5g08190	Afu5g08190 AspGDID:ASPL0000107891 COORDS:Chr5_A_fumigatus_Af293:2074402-2073089C, translated using codon table 1 (437 amino acids) Uncharacterized ORF; Ortholog of <i>A. nidulans FGSC A4</i> : AN7717, <i>A. oryzae RIB40</i> : AO090701000736, <i>Aspergillus wentii</i> : Aspwe1_0101496, <i>Aspergillus sydowii</i> : Aspsy1_0046260 and <i>Aspergillus terreus NIH2624</i> : ATET_08307	1.69164	5.49	1	2	2	2	437	48.0122	5.49072
Afu1g05310	Afu1g05310 AspGDID:ASPL0000101699 COORDS:Chr1_A_fumigatus_Af293:1529654-1532946W, translated using codon table 1 (1066 amino acids) Uncharacterized ORF; Ortholog(s) have role in cellular response to nitrogen starvation, negative regulation of G0 to G1 transition, ribosomal small subunit biogenesis and 90S preribosome, nucleolus localization	1.67996	1.59	1	2	2	2	1066	119.041	7.28369
Afu6g11160	idi1 AspGDID:ASPL0000109466 COORDS:Chr6_A_fumigatus_Af293:2753055-2752098C, translated using codon table 1 (279 amino acids) Uncharacterized ORF; Isopentenyl diphosphate isomerase; SrbA-regulated during hypoxia	1.63792	4.3	1	2	2	2	279	31.5708	5.04639

## Sheet: SakA GFP CR_30 min
Accession	Description	Score	Coverage	# Proteins	# Unique Peptides	# Peptides	# PSMs	# AAs	MW [kDa]	calc. pI
Afu1g12940	sakA AspGDID:ASPL0000102362 COORDS:Chr1_A_fumigatus_Af293:3428181-3429807W, translated using codon table 1 (366 amino acids) Verified ORF; Putative mitogen-activated protein kinase (MAPK) with predicted roles in the osmotic and oxidative stress responses; involved in sensing nitrogen in the medium	260.677	78.14	1	22	22	63	366	41.9334	5.60498
Afu3g06550	Afu3g06550 AspGDID:ASPL0000105066 COORDS:Chr3_A_fumigatus_Af293:1623469-1625008W, translated using codon table 1 (469 amino acids) Uncharacterized ORF; Has domain(s) with predicted phosphatase activity, phosphoserine phosphatase activity and role in L-serine biosynthetic process, metabolic process	185.637	79.1	1	22	22	35	469	51.8419	5.89697
Afu2g17000	Afu2g17000 AspGDID:ASPL0000104419 COORDS:Chr2_A_fumigatus_Af293:4544466-4551049W, translated using codon table 1 (2173 amino acids) Uncharacterized ORF; Ortholog of <i>A. nidulans FGSC A4</i> : AN5649, AN1674, AN0384, AN1268, AN7262, <i>A. fumigatus Af293</i> : Afu1g01700, Afu4g08730, Afu4g13630, Afu1g10012 and <i>A. niger CBS 513.88</i> : An01g09380, An01g06520, An04g09080, An04g03600	78.7463	17.17	1	22	22	27	2173	224.251	3.99268
Afu5g04330	Afu5g04330 AspGDID:ASPL0000107612 COORDS:Chr5_A_fumigatus_Af293:1164058-1160457C, translated using codon table 1 (967 amino acids) Verified ORF; Putative aminopeptidase; conidia-enriched protein; protein induced by heat shock; repressed by gliotoxin exposure	72.4075	28.13	1	19	19	20	967	108.639	6.7124
Afu6g09990	Afu6g09990 AspGDID:ASPL0000109355 COORDS:Chr6_A_fumigatus_Af293:2459187-2462825W, translated using codon table 1 (1095 amino acids) Uncharacterized ORF; Ortholog(s) have cytosol, nuclear envelope, nuclear membrane, nucleolus localization	62.946	18.36	1	16	16	18	1095	121.526	4.729
Afu1g04620	Afu1g04620 AspGDID:ASPL0000101631 COORDS:Chr1_A_fumigatus_Af293:1309293-1307958C, translated using codon table 1 (348 amino acids) Uncharacterized ORF; Putative zinc-containing alcohol dehydrogenase; reacts with rabbit immunosera exposed to A. fumigatus conidia; hypoxia induced protein; transcript up-regulated in conidia exposed to neutrophils; repressed by gliotoxin exposure	58.9496	48.56	1	12	12	14	348	37.8294	6.63916
Afu6g03440	Afu6g03440 AspGDID:ASPL0000108799 COORDS:Chr6_A_fumigatus_Af293:738342-736781C, translated using codon table 1 (497 amino acids) Uncharacterized ORF; Putative fructosyl amine; transcript induced by voriconazole	57.0646	41.85	1	14	14	16	497	54.895	5.75732
Afu2g02590	Afu2g02590 AspGDID:ASPL0000103089 COORDS:Chr2_A_fumigatus_Af293:666730-668457W, translated using codon table 1 (555 amino acids) Uncharacterized ORF; Aspartyl-tRNA synthetase	52.1374	27.03	1	11	11	14	555	61.5887	6.32861
Afu2g06150	pdiA AspGDID:ASPL0000103438 COORDS:Chr2_A_fumigatus_Af293:1746610-1744786C, translated using codon table 1 (517 amino acids) Verified ORF; Putative protein disulfide isomerase; conidial surface associated	52.0797	37.14	1	14	14	14	517	56.152	4.70361
Afu2g02320	Afu2g02320 AspGDID:ASPL0000103062 COORDS:Chr2_A_fumigatus_Af293:586013-584085C, translated using codon table 1 (571 amino acids) Uncharacterized ORF; Hsp70 chaperone	51.9588	38.18	1	14	14	14	571	61.7457	5.14795
Afu2g13250	trpB AspGDID:ASPL0000104039 COORDS:Chr2_A_fumigatus_Af293:3407647-3405303C, translated using codon table 1 (735 amino acids) Uncharacterized ORF; Putative bifunctional tryptophan synthase	51.9265	27.21	1	11	11	12	735	78.7133	5.96045
Afu5g06680	gatA AspGDID:ASPL0000107744 COORDS:Chr5_A_fumigatus_Af293:1641603-1643263W, translated using codon table 1 (499 amino acids) Uncharacterized ORF; 4-aminobutyrate aminotransferase; transcript downregulated in response to voriconazole; calcium induced	48	35.07	1	11	11	13	499	55.1725	8.93896
Afu2g01010	Afu2g01010 AspGDID:ASPL0000102932 COORDS:Chr2_A_fumigatus_Af293:234729-236432W, translated using codon table 1 (534 amino acids) Uncharacterized ORF; Putative myo-inositol-phosphate synthase; transcript up-regulated in conidia exposed to neutrophils	44.3889	26.78	1	10	10	12	534	58.6346	6.22705
Afu2g07620	Afu2g07620 AspGDID:ASPL0000103483 COORDS:Chr2_A_fumigatus_Af293:1942912-1941117C, translated using codon table 1 (534 amino acids) Uncharacterized ORF; Cystathionine beta-synthase; transcript induced by exposure to human airway epithelial cells	44.2513	32.96	1	10	10	11	534	57.7783	6.97607
Afu2g14030	Afu2g14030 AspGDID:ASPL0000104118 COORDS:Chr2_A_fumigatus_Af293:3674689-3672338C, translated using codon table 1 (719 amino acids) Uncharacterized ORF; Ortholog(s) have arginine-tRNA ligase activity, role in arginyl-tRNA aminoacylation and cytosol, mitochondrion localization	43.4061	21.56	1	13	13	13	719	80.6727	8.00146
Afu1g02030	Afu1g02030 AspGDID:ASPL0000101373 COORDS:Chr1_A_fumigatus_Af293:600839-603263W, translated using codon table 1 (740 amino acids) Uncharacterized ORF; Putative eukaryotic translation initiation factor 3 subunit; protein induced by heat shock	43.1773	22.03	1	12	12	14	740	84.4348	5.35107
Afu3g11360	Afu3g11360 AspGDID:ASPL0000105534 COORDS:Chr3_A_fumigatus_Af293:2979671-2978196C, translated using codon table 1 (451 amino acids) Uncharacterized ORF; Ortholog(s) have role in ascospore formation, cellular protein localization, cellular response to caffeine and eukaryotic translation initiation factor 3 complex assembly, <a href="#GOsection">more</a>	43.0078	30.16	1	10	10	11	451	51.7173	5.35107
Afu2g11060	Afu2g11060 AspGDID:ASPL0000103821 COORDS:Chr2_A_fumigatus_Af293:2836626-2837531W, translated using codon table 1 (158 amino acids) Uncharacterized ORF; Putative acylCoA binding family protein	42.0562	53.16	1	6	6	9	158	17.2987	5.99854
Afu2g15760	Afu2g15760 AspGDID:ASPL0000104293 COORDS:Chr2_A_fumigatus_Af293:4162600-4165937W, translated using codon table 1 (1033 amino acids) Uncharacterized ORF; Ortholog(s) have ubiquitin activating enzyme activity, role in mRNA export from nucleus, protein ubiquitination and cytosol, nucleus localization	41.7252	20.62	1	13	13	13	1033	115.146	5.24951
Afu7g01860	sti1 AspGDID:ASPL0000109981 COORDS:Chr7_A_fumigatus_Af293:501500-503455W, translated using codon table 1 (581 amino acids) Verified ORF; Putative heat shock protein; protein levels increase in response to amphotericin B; transcript induced by exposure to human airway epithelial cells; induced by gliotoxin exposure	41.1468	24.1	1	9	9	10	581	64.2614	5.57959
Afu2g05650	Afu2g05650 AspGDID:ASPL0000103388 COORDS:Chr2_A_fumigatus_Af293:1582005-1580139C, translated using codon table 1 (604 amino acids) Uncharacterized ORF; Ortholog(s) have asparagine-tRNA ligase activity, role in asparaginyl-tRNA aminoacylation and cytosol localization	40.7472	22.19	1	8	8	10	604	68.2394	6.13818
Afu5g04250	cysD AspGDID:ASPL0000107604 COORDS:Chr5_A_fumigatus_Af293:1136288-1134676C, translated using codon table 1 (434 amino acids) Uncharacterized ORF; Homocysteine synthase; transcript up-regulated in conidia exposed to neutrophils	40.0091	27.88	1	8	8	10	434	46.8658	6.354
Afu2g10070	Afu2g10070 AspGDID:ASPL0000103722 COORDS:Chr2_A_fumigatus_Af293:2576586-2580364W, translated using codon table 1 (1175 amino acids) Uncharacterized ORF; Putative carbamoyl-phosphate synthetase, large subunit	37.2906	13.28	1	10	11	13	1175	129.134	6.21436
Afu1g15450	Afu1g15450 AspGDID:ASPL0000102610 COORDS:Chr1_A_fumigatus_Af293:4172637-4171167C, translated using codon table 1 (424 amino acids) Uncharacterized ORF; Ortholog(s) have adenylosuccinate synthase activity, sulfinylpropanyl adenylate synthase activity	37.0397	30.19	1	11	11	12	424	46.6189	6.90283
Afu1g12840	niiA AspGDID:ASPL0000102352 COORDS:Chr1_A_fumigatus_Af293:3393418-3397198W, translated using codon table 1 (1102 amino acids) Uncharacterized ORF; Putative nitrite reductase; nitrogen-regulated gene, used as a conditional promoter; protein induced by heat shock; transcript downregulated in response to voriconazole	36.8747	14.34	1	13	13	13	1102	123.067	6.62451
Afu2g07420	sac6 AspGDID:ASPL0000103465 COORDS:Chr2_A_fumigatus_Af293:1889973-1887748C, translated using codon table 1 (646 amino acids) Verified ORF; Putative actin-bundling protein, fimbrin; conidia-enriched protein	36.0747	18.89	1	8	8	9	646	72.4336	6.12549
Afu2g10030	Afu2g10030 AspGDID:ASPL0000103718 COORDS:Chr2_A_fumigatus_Af293:2570628-2569665C, translated using codon table 1 (265 amino acids) Uncharacterized ORF; Immunoreactive protein; calcium induced; transcript induced by exposure to human airway epithelial cells; induced by gliotoxin exposure	35.4515	45.66	1	8	8	10	265	28.2482	6.3667
Afu5g09240	sod1 AspGDID:ASPL0000107993 COORDS:Chr5_A_fumigatus_Af293:2379492-2380591W, translated using codon table 1 (154 amino acids) Verified ORF; Cu/Zn superoxide dismutase; recognized by sera from aspergillosis patients; highly expressed in conidia; transcript induced by copper starvation, menadione, gliotoxin and growth at high temperature; protein induced by hydrogen peroxide	35.2795	59.74	1	5	5	7	154	15.9569	6.52197
Afu1g09800	Afu1g09800 AspGDID:ASPL0000102046 COORDS:Chr1_A_fumigatus_Af293:2543871-2545480W, translated using codon table 1 (394 amino acids) Uncharacterized ORF; Ortholog of S. cerevisiae OLA1; snoRNA Afu-304 encoded within intron 2	35.2391	32.49	1	10	10	10	394	43.452	7.81104
Afu7g02180	Afu7g02180 AspGDID:ASPL0000110013 COORDS:Chr7_A_fumigatus_Af293:584569-586235W, translated using codon table 1 (509 amino acids) Uncharacterized ORF; Ortholog(s) have UDP-N-acetylglucosamine diphosphorylase activity, role in UDP-N-acetylglucosamine biosynthetic process and cytosol, nucleus localization	35.1255	22.4	1	9	9	11	509	56.6802	6.1001
Afu7g05070	frdA AspGDID:ASPL0000110199 COORDS:Chr7_A_fumigatus_Af293:1197069-1195618C, translated using codon table 1 (483 amino acids) Uncharacterized ORF; Putative FAD-dependent oxidoreductase; immunoreactive protein	34.7287	24.02	1	9	9	10	483	51.2359	6.0874
Afu3g11400	pep2 AspGDID:ASPL0000105538 COORDS:Chr3_A_fumigatus_Af293:2990626-2992029W, translated using codon table 1 (398 amino acids) Verified ORF; Aspartic acid endopeptidase; conidia-enriched protein; conidial surface associated; predicted signal secretion sequence; hypoxia induced protein; transcript up-regulated in conidia exposed to neutrophils and by growth on BSA	34.556	25.88	1	6	6	8	398	43.3277	4.99561
Afu8g03880	Afu8g03880 AspGDID:ASPL0000110724 COORDS:Chr8_A_fumigatus_Af293:825050-828378W, translated using codon table 1 (1011 amino acids) Uncharacterized ORF; Putative alanyl-tRNA synthetase; protein induced by hydrogen peroxide	33.6173	13.35	1	10	10	10	1011	113.644	6.48096
Afu3g05450	Afu3g05450 AspGDID:ASPL0000104961 COORDS:Chr3_A_fumigatus_Af293:1314948-1313258C, translated using codon table 1 (478 amino acids) Uncharacterized ORF; Putative glutamate carboxypeptidase	33.5419	20.08	1	6	6	7	478	52.9817	5.71924
Afu4g09740	Afu4g09740 AspGDID:ASPL0000106688 COORDS:Chr4_A_fumigatus_Af293:2536684-2538622W, translated using codon table 1 (567 amino acids) Uncharacterized ORF; Ortholog(s) have unfolded protein binding activity	33.4789	24.34	1	11	11	11	567	61.363	5.2876
Afu3g08840	Afu3g08840 AspGDID:ASPL0000105285 COORDS:Chr3_A_fumigatus_Af293:2262208-2266262W, translated using codon table 1 (1212 amino acids) Uncharacterized ORF; Ortholog(s) have role in hyphal growth, nuclear division and Golgi apparatus, hyphal tip localization	33.0251	11.72	1	8	8	8	1212	135.784	6.27783
Afu5g05490	Afu5g05490 AspGDID:ASPL0000107628 COORDS:Chr5_A_fumigatus_Af293:1274938-1276745W, translated using codon table 1 (474 amino acids) Uncharacterized ORF; Ortholog(s) have cytosol localization	31.8292	33.12	1	11	11	11	474	54.1563	6.43018
Afu2g11150	Afu2g11150 AspGDID:ASPL0000103830 COORDS:Chr2_A_fumigatus_Af293:2856083-2857872W, translated using codon table 1 (468 amino acids) Uncharacterized ORF; Putative secretory-pathway GDP dissociation inhibitor; transcript and protein levels increase upon exposure to amphotericin B	31.6913	26.28	1	7	7	8	468	52.2473	5.50342
Afu1g01740	Afu1g01740 AspGDID:ASPL0000101344 COORDS:Chr1_A_fumigatus_Af293:538203-536416C, translated using codon table 1 (531 amino acids) Uncharacterized ORF; Ortholog(s) have unfolded protein binding activity, role in protein folding and chaperonin-containing T-complex, nucleus localization	31.2771	23.92	1	9	9	9	531	57.1551	6.21436
Afu3g01110	gua1 AspGDID:ASPL0000104631 COORDS:Chr3_A_fumigatus_Af293:261096-258836C, translated using codon table 1 (539 amino acids) Uncharacterized ORF; Putative GMP synthase ([glutamine-hydrolyzing); Yap1-dependent induction in response to hydrogen peroxide	31.2566	22.63	1	10	10	10	539	59.4337	6.26514
Afu6g04010	Afu6g04010 AspGDID:ASPL0000108856 COORDS:Chr6_A_fumigatus_Af293:901498-904822W, translated using codon table 1 (962 amino acids) Uncharacterized ORF; Ortholog(s) have importin-alpha export receptor activity, role in cell division, protein export from nucleus and nuclear membrane localization	31.096	14.66	1	9	9	9	962	108.421	5.37646
Afu6g02630	Afu6g02630 AspGDID:ASPL0000108718 COORDS:Chr6_A_fumigatus_Af293:512097-510055C, translated using codon table 1 (441 amino acids) Uncharacterized ORF; Ortholog(s) have ATP-dependent RNA helicase activity	30.9173	26.3	1	8	8	9	441	49.5704	5.8208
Afu4g13700	Afu4g13700 AspGDID:ASPL0000107076 COORDS:Chr4_A_fumigatus_Af293:3586027-3588483W, translated using codon table 1 (737 amino acids) Uncharacterized ORF; Ortholog(s) have cytosol localization	29.4256	16.15	1	8	8	8	737	84.4129	7.09326
Afu3g07680	Afu3g07680 AspGDID:ASPL0000105174 COORDS:Chr3_A_fumigatus_Af293:1941416-1940148C, translated using codon table 1 (422 amino acids) Uncharacterized ORF; Putative ran GTPase activating protein	29.3028	23.93	1	6	6	7	422	46.1998	4.67822
Afu5g05920	Afu5g05920 AspGDID:ASPL0000107669 COORDS:Chr5_A_fumigatus_Af293:1392015-1389862C, translated using codon table 1 (699 amino acids) Uncharacterized ORF; Putative glycyl-tRNA synthetase; protein induced by heat shock	29.0855	17.6	1	10	10	10	699	79.0498	6.46826
Afu4g04550	Afu4g04550 AspGDID:ASPL0000106273 COORDS:Chr4_A_fumigatus_Af293:1282186-1283190W, translated using codon table 1 (204 amino acids) Uncharacterized ORF; Putative phosphoribosyltransferase; protein induced by hydrogen peroxide	28.9263	49.02	1	5	5	5	204	23.1709	5.32568
Afu3g01580	Afu3g01580 AspGDID:ASPL0000104678 COORDS:Chr3_A_fumigatus_Af293:397771-395356C, translated using codon table 1 (646 amino acids) Uncharacterized ORF; Putative glucose-methanol-choline (GMC) oxidoreductase; protein induced by hydrogen peroxide; hypoxia induced protein; repressed by gliotoxin exposure	28.8068	18.58	1	9	9	10	646	72.1047	7.41553
Afu6g03460	Afu6g03460 AspGDID:ASPL0000108801 COORDS:Chr6_A_fumigatus_Af293:741171-742895W, translated using codon table 1 (574 amino acids) Uncharacterized ORF; Has domain(s) with predicted ATP binding activity	28.7849	18.12	1	6	6	6	574	63.4223	6.13818
Afu6g08720	Afu6g08720 AspGDID:ASPL0000109228 COORDS:Chr6_A_fumigatus_Af293:2067644-2066477C, translated using codon table 1 (342 amino acids) Uncharacterized ORF; Putative 5'-methylthioadenosine phosphorylase; transcript induced by exposure to human airway epithelial cells	28.7413	17.84	1	4	4	6	342	37.582	7.38623
Afu4g08710	Afu4g08710 AspGDID:ASPL0000106586 COORDS:Chr4_A_fumigatus_Af293:2256334-2255247C, translated using codon table 1 (287 amino acids) Uncharacterized ORF; Putative short chain dehydrogenase; transcriptionally up-regulated in conidia exposed to neutrophils; induced by gliotoxin exposure	28.5447	28.92	1	6	6	7	287	30.9087	5.38916
Afu3g10660	erg13 AspGDID:ASPL0000105464 COORDS:Chr3_A_fumigatus_Af293:2760689-2762268W, translated using codon table 1 (460 amino acids) Uncharacterized ORF; Putative hydroxymethyl glutaryl-coenzyme A synthase with a predicted role in ergosterol biosynthesis; SrbA-regulated during hypoxia	28.3079	25.22	1	5	5	5	460	50.7644	6.55127
Afu3g08470	Afu3g08470 AspGDID:ASPL0000105250 COORDS:Chr3_A_fumigatus_Af293:2171618-2174019W, translated using codon table 1 (511 amino acids) Verified ORF; Glucose-6-phosphate 1-dehydrogenase	28.1724	16.83	1	8	8	9	511	58.8991	7.00537
Afu8g04800	Afu8g04800 AspGDID:ASPL0000110814 COORDS:Chr8_A_fumigatus_Af293:1101881-1098425C, translated using codon table 1 (1057 amino acids) Uncharacterized ORF; Putative valyl-tRNA synthetase; transcript induced by exposure to human airway epithelial cells	28.1614	12.3	1	9	9	9	1057	119.903	7.18115
Afu6g07540	Afu6g07540 AspGDID:ASPL0000109114 COORDS:Chr6_A_fumigatus_Af293:1715811-1713540C, translated using codon table 1 (548 amino acids) Uncharacterized ORF; Ortholog(s) have chaperonin-containing T-complex localization	27.9828	22.99	1	9	9	9	548	59.8493	5.51611
Afu5g10570	Afu5g10570 AspGDID:ASPL0000108121 COORDS:Chr5_A_fumigatus_Af293:2705752-2704997C, translated using codon table 1 (154 amino acids) Verified ORF; Cofilin	27.6351	40.91	1	5	5	7	154	17.0176	5.65576
Afu5g02450	erg20 AspGDID:ASPL0000107425 COORDS:Chr5_A_fumigatus_Af293:631975-633093W, translated using codon table 1 (347 amino acids) Uncharacterized ORF; Putative polyprenyl synthetase; farnesyl-pyrophosphate synthetase; SrbA-regulated during hypoxia	27.4197	24.78	1	8	8	8	347	39.7375	5.50342
Afu5g08540	aspA AspGDID:ASPL0000107925 COORDS:Chr5_A_fumigatus_Af293:2167838-2169399W, translated using codon table 1 (382 amino acids) Verified ORF; Septin; hypoxia repressed protein; repressed by exposure to artemisinin	27.3076	21.2	1	7	7	8	382	43.2901	5.13525
Afu3g12100	Afu3g12100 AspGDID:ASPL0000105606 COORDS:Chr3_A_fumigatus_Af293:3178707-3181079W, translated using codon table 1 (694 amino acids) Uncharacterized ORF; Putative trehalase phosphorylase with a predicted role in the glucose-1-phosphate pathway	27.213	14.12	1	6	6	8	694	78.2557	6.1001
Afu6g07640	Afu6g07640 AspGDID:ASPL0000109124 COORDS:Chr6_A_fumigatus_Af293:1735592-1737557W, translated using codon table 1 (604 amino acids) Uncharacterized ORF; Has domain(s) with predicted ATP binding, aminoacyl-tRNA ligase activity, lysine-tRNA ligase activity, nucleic acid binding activity, role in lysyl-tRNA aminoacylation, tRNA aminoacylation for protein translation and cytoplasm localization	27.1612	15.23	1	8	8	9	604	68.9187	6.06201
Afu7g05470	Afu7g05470 AspGDID:ASPL0000110240 COORDS:Chr7_A_fumigatus_Af293:1320985-1322187W, translated using codon table 1 (352 amino acids) Uncharacterized ORF; Putative electron transfer flavoprotein alpha subunit; transcript induced by exposure to human airway epithelial cells; induced by exposure to artemisinin	27.1529	30.4	1	7	7	7	352	36.6673	6.27783
Afu5g11380	Afu5g11380 AspGDID:ASPL0000108197 COORDS:Chr5_A_fumigatus_Af293:2924786-2923943C, translated using codon table 1 (197 amino acids) Uncharacterized ORF; Putative Rho-GDP dissociation inhibitor; transcript and protein levels increased in response to amphotericin B	26.9631	56.35	1	7	7	8	197	22.3004	5.90967
Afu4g11330	Afu4g11330 AspGDID:ASPL0000106842 COORDS:Chr4_A_fumigatus_Af293:2975120-2976392W, translated using codon table 1 (379 amino acids) Uncharacterized ORF; Ortholog(s) have ATPase activator activity, chaperone binding activity, role in protein folding, response to stress and cytosol localization	26.6493	30.87	1	8	8	8	379	42.3297	6.03662
Afu4g03760	Afu4g03760 AspGDID:ASPL0000106195 COORDS:Chr4_A_fumigatus_Af293:1054642-1057888W, translated using codon table 1 (1060 amino acids) Uncharacterized ORF; Putative glycine dehydrogenase	26.2795	10	1	7	7	8	1060	115.13	7.15186
Afu2g01920	Afu2g01920 AspGDID:ASPL0000103022 COORDS:Chr2_A_fumigatus_Af293:479695-481689W, translated using codon table 1 (664 amino acids) Uncharacterized ORF; Ortholog(s) have cytosol localization	26.2564	17.62	1	8	8	8	664	74.2475	7.1958
Afu3g08900	Afu3g08900 AspGDID:ASPL0000105291 COORDS:Chr3_A_fumigatus_Af293:2277005-2275596C, translated using codon table 1 (408 amino acids) Uncharacterized ORF; Putative tubulin-specific chaperone c; transcript up-regulated in conidia exposed to neutrophils; transcript induced by exposure to human airway epithelial cells	26.1008	18.38	1	5	5	7	408	44.215	5.40186
Afu6g10470	zpr1 AspGDID:ASPL0000109402 COORDS:Chr6_A_fumigatus_Af293:2596608-2598107W, translated using codon table 1 (475 amino acids) Uncharacterized ORF; Putative zinc finger protein; transcript highly induced during conidial germination	25.7579	21.26	1	8	8	8	475	53.5291	4.66553
Afu3g10800	Afu3g10800 AspGDID:ASPL0000105478 COORDS:Chr3_A_fumigatus_Af293:2807176-2811179W, translated using codon table 1 (1310 amino acids) Uncharacterized ORF; Ortholog of <i>A. nidulans FGSC A4</i> : AN4908, <i>A. niger CBS 513.88</i> : An02g06530, <i>A. oryzae RIB40</i> : AO090003000629, <i>Aspergillus wentii</i> : Aspwe1_0036953 and <i>Aspergillus sydowii</i> : Aspsy1_0043015	25.5761	9.24	1	8	8	9	1310	145.89	7.09326
Afu7g04190	Afu7g04190 AspGDID:ASPL0000110114 COORDS:Chr7_A_fumigatus_Af293:948503-946680C, translated using codon table 1 (519 amino acids) Uncharacterized ORF; Ortholog(s) have methyltransferase activity, role in cellular response to biotic stimulus, filamentous growth, glucosylceramide biosynthetic process, pathogenesis and plasma membrane localization	25.4595	19.46	1	8	8	8	519	58.9195	6.87354
Afu2g14670	Afu2g14670 AspGDID:ASPL0000104181 COORDS:Chr2_A_fumigatus_Af293:3849283-3851093W, translated using codon table 1 (585 amino acids) Uncharacterized ORF; Ortholog(s) have role in ascospore formation, cellular response to caffeine, eukaryotic translation initiation factor 3 complex assembly, gamma-tubulin complex localization	25.2654	19.49	1	6	6	7	585	65.1913	5.26221
Afu2g06000	Afu2g06000 AspGDID:ASPL0000103423 COORDS:Chr2_A_fumigatus_Af293:1696635-1700101W, translated using codon table 1 (1093 amino acids) Uncharacterized ORF; Putative NAD+ dependent glutamate dehydrogenase; transcript induced during conidial germination	25.1673	10.34	1	7	7	7	1093	123.281	6.55127
Afu4g12990	trr1 AspGDID:ASPL0000107005 COORDS:Chr4_A_fumigatus_Af293:3402102-3403373W, translated using codon table 1 (392 amino acids) Uncharacterized ORF; Putative thioredoxin reductase; transcript upregulated during conidial germination and in hyphae exposed to neutrophils	25.1475	29.08	1	6	6	6	392	42.1635	5.51611
Afu1g14120	bfr1 AspGDID:ASPL0000102480 COORDS:Chr1_A_fumigatus_Af293:3774407-3776224W, translated using codon table 1 (510 amino acids) Uncharacterized ORF; Putative nuclear segregation protein	25.1389	18.04	1	7	7	8	510	57.388	9.12939
Afu4g11510	srb1 AspGDID:ASPL0000106859 COORDS:Chr4_A_fumigatus_Af293:3032998-3031629C, translated using codon table 1 (364 amino acids) Verified ORF; GDP-mannose pyrophosphorylase, which catalyses the synthesis of GDP-mannose from GTP and mannose-1-phosphate in cell wall biosynthesis	25.1325	25	1	6	6	7	364	40.0991	7.48877
Afu2g12980	Afu2g12980 AspGDID:ASPL0000104011 COORDS:Chr2_A_fumigatus_Af293:3335985-3331790C, translated using codon table 1 (1263 amino acids) Uncharacterized ORF; Putative protein transport protein; transcript downregulated in response to amphotericin B	25.0693	8.95	1	8	8	8	1263	136.688	6.72705
Afu1g13090	Afu1g13090 AspGDID:ASPL0000102377 COORDS:Chr1_A_fumigatus_Af293:3472871-3470577C, translated using codon table 1 (764 amino acids) Uncharacterized ORF; Ortholog(s) have anthranilate synthase activity, glyceraldehyde-3-phosphate dehydrogenase (NAD+) (phosphorylating) activity, indole-3-glycerol-phosphate synthase activity, phosphoribosylanthranilate isomerase activity	25.025	13.22	1	7	7	7	764	82.1806	6.34131
Afu4g09030	Afu4g09030 AspGDID:ASPL0000106618 COORDS:Chr4_A_fumigatus_Af293:2345336-2342358C, translated using codon table 1 (953 amino acids) Verified ORF; Putative aminopeptidase; conidia-enriched protein; protein induced by heat shock; transcript induced by exposure to human airway epithelial cells; induced by gliotoxin exposure	25.013	11.86	1	8	8	8	953	106.16	6.7417
Afu5g06130	Afu5g06130 AspGDID:ASPL0000107690 COORDS:Chr5_A_fumigatus_Af293:1465997-1464574C, translated using codon table 1 (331 amino acids) Uncharacterized ORF; Succinyl-CoA synthetase alpha subunit; hypoxia induced protein	24.837	28.4	1	5	5	6	331	34.552	8.63135
Afu2g07960	Afu2g07960 AspGDID:ASPL0000103516 COORDS:Chr2_A_fumigatus_Af293:2038888-2047447W, translated using codon table 1 (2674 amino acids) Uncharacterized ORF; Ortholog(s) have role in regulation of translational elongation and cytosolic ribosome, extracellular region, mitochondrion localization	24.6867	3.59	1	6	6	7	2674	291.954	5.85889
Afu5g02360	Afu5g02360 AspGDID:ASPL0000107416 COORDS:Chr5_A_fumigatus_Af293:608651-606106C, translated using codon table 1 (698 amino acids) Uncharacterized ORF; Ortholog(s) have role in hyphal growth, peroxisome organization, vacuole organization and Golgi apparatus localization	24.5989	14.9	1	6	6	7	698	78.1349	8.17725
Afu5g12260	tigA AspGDID:ASPL0000108282 COORDS:Chr5_A_fumigatus_Af293:3183118-3184297W, translated using codon table 1 (368 amino acids) Uncharacterized ORF; Putative disulfide isomerase	24.5921	23.91	1	6	6	7	368	40.2289	6.44287
Afu1g15960	Afu1g15960 AspGDID:ASPL0000102659 COORDS:Chr1_A_fumigatus_Af293:4331468-4333260W, translated using codon table 1 (554 amino acids) Uncharacterized ORF; Ortholog(s) have flavin adenine dinucleotide binding, glutathione transferase activity, glutathione-disulfide reductase activity	24.463	13.9	1	5	5	6	554	60.0714	8.70459
Afu5g11560	Afu5g11560 AspGDID:ASPL0000108213 COORDS:Chr5_A_fumigatus_Af293:2965961-2964433C, translated using codon table 1 (439 amino acids) Uncharacterized ORF; Ortholog(s) have ATP binding activity	24.3204	24.83	1	5	5	5	439	47.6211	6.55127
Afu5g06010	Afu5g06010 AspGDID:ASPL0000107678 COORDS:Chr5_A_fumigatus_Af293:1425309-1424188C, translated using codon table 1 (247 amino acids) Uncharacterized ORF; Ortholog(s) have ribosomal large subunit binding activity	24.1443	30.77	1	4	4	5	247	26.5706	4.85596
Afu4g12920	Afu4g12920 AspGDID:ASPL0000106998 COORDS:Chr4_A_fumigatus_Af293:3384591-3386472W, translated using codon table 1 (604 amino acids) Uncharacterized ORF; Putative mitochondrial histidyl-tRNA synthetase; protein induced by heat shock	23.9896	17.72	1	6	6	7	604	66.6164	7.13721
Afu1g13710	Afu1g13710 AspGDID:ASPL0000102439 COORDS:Chr1_A_fumigatus_Af293:3650512-3647224C, translated using codon table 1 (1064 amino acids) Uncharacterized ORF; Isoleucyl-tRNA synthetase, cytoplasmic	23.7977	8.55	1	7	7	7	1064	122.315	6.43018
Afu4g11340	lys9 AspGDID:ASPL0000106843 COORDS:Chr4_A_fumigatus_Af293:2978580-2976809C, translated using codon table 1 (450 amino acids) Uncharacterized ORF; Saccharopine dehydrogenase; hypoxia induced protein; transcript induced by exposure to human airway epithelial cells	23.7362	25.11	1	9	9	9	450	49.4183	6.27783
Afu6g02230	glkA AspGDID:ASPL0000108678 COORDS:Chr6_A_fumigatus_Af293:395467-393918C, translated using codon table 1 (493 amino acids) Verified ORF; Putative glucokinase; conidia-enriched protein; transcripts extremely abundant in resting conidia, levels decline during germination; transcript induced by exposure to human airway epithelial cells	23.476	20.89	1	7	7	7	493	54.4198	5.50342
Afu8g05580	coaT AspGDID:ASPL0000110887 COORDS:Chr8_A_fumigatus_Af293:1308874-1310609W, translated using codon table 1 (525 amino acids) Uncharacterized ORF; Putative coenzyme A transferase; transcript induced by exposure to human airway epithelial cells	23.4637	11.05	1	4	4	5	525	58.1086	6.771
Afu4g06900	Afu4g06900 AspGDID:ASPL0000106404 COORDS:Chr4_A_fumigatus_Af293:1787004-1789272W, translated using codon table 1 (573 amino acids) Uncharacterized ORF; Ortholog(s) have asparagine synthase (glutamine-hydrolyzing) activity, role in asparagine biosynthetic process and cytosol, nucleus localization	23.2922	17.1	1	6	6	7	573	64.6714	6.29053
Afu6g10260	akr1 AspGDID:ASPL0000109382 COORDS:Chr6_A_fumigatus_Af293:2540226-2538892C, translated using codon table 1 (334 amino acids) Verified ORF; Putative aldehyde reductase; abundant protein in conidia; transcript up-regulated in conidia exposed to neutrophils and to human airway epithelial cells	23.0957	23.95	1	6	6	7	334	37.1834	6.46826
Afu1g09930	gcy1 AspGDID:ASPL0000102059 COORDS:Chr1_A_fumigatus_Af293:2570399-2571627W, translated using codon table 1 (349 amino acids) Uncharacterized ORF; Putative glycerol dehydrogenase; protein level decreases upon heat shock; transcript up-regulated in conidia exposed to neutrophils	23.0323	20.92	1	6	6	7	349	39.1061	8.83643
Afu1g08850	aspD AspGDID:ASPL0000101951 COORDS:Chr1_A_fumigatus_Af293:2293812-2292464C, translated using codon table 1 (346 amino acids) Verified ORF; Septin; localizes to long tubular structures within hyphae and to newly formed septa; repressed by exposure to artemisinin	22.8974	23.12	1	6	6	6	346	39.2071	7.84033
Afu2g01040	Afu2g01040 AspGDID:ASPL0000102935 COORDS:Chr2_A_fumigatus_Af293:239825-238336C, translated using codon table 1 (379 amino acids) Uncharacterized ORF; Putative formaldehyde dehydrogenase; transcript up-regulated in conidia exposed to neutrophils	22.8368	28.5	1	6	6	7	379	40.0182	7.26904
Afu4g00610	Afu4g00610 AspGDID:ASPL0000105980 COORDS:Chr4_A_fumigatus_Af293:166314-168179W, translated using codon table 1 (601 amino acids) Uncharacterized ORF; Putative aryl-alcohol dehydrogenase	22.8316	15.31	1	5	5	6	601	65.2895	5.51611
Afu2g13295	Afu2g13295 AspGDID:ASPL0000362536 COORDS:Chr2_A_fumigatus_Af293:3433790-3435299W, translated using codon table 1 (453 amino acids) Uncharacterized ORF; Ortholog(s) have cytosol, nucleus localization	22.7239	18.1	1	6	6	7	453	49.7017	6.80029
Afu7g04070	Afu7g04070 AspGDID:ASPL0000110102 COORDS:Chr7_A_fumigatus_Af293:916318-915016C, translated using codon table 1 (369 amino acids) Uncharacterized ORF; Ortholog(s) have 3-deoxy-7-phosphoheptulonate synthase activity, role in aromatic amino acid family biosynthetic process and cytoplasm, nucleus localization	22.6607	23.31	1	5	5	5	369	40.0468	6.7417
Afu5g02720	Afu5g02720 AspGDID:ASPL0000107452 COORDS:Chr5_A_fumigatus_Af293:710324-714412W, translated using codon table 1 (1362 amino acids) Uncharacterized ORF; Ortholog(s) have phosphoribosylformylglycinamidine synthase activity, role in purine nucleotide biosynthetic process and Golgi apparatus localization	22.4973	7.05	1	6	6	6	1362	147.52	6.12549
Afu1g07530	Afu1g07530 AspGDID:ASPL0000101918 COORDS:Chr1_A_fumigatus_Af293:2122230-2121254C, translated using codon table 1 (257 amino acids) Uncharacterized ORF; Ortholog(s) have adenylate kinase activity, role in ADP biosynthetic process, DNA replication initiation and cytosol, mitochondrial intermembrane space, mitochondrial outer membrane, nucleus localization	22.1066	35.02	1	7	7	7	257	28.6848	7.88428
Afu1g02150	Afu1g02150 AspGDID:ASPL0000101385 COORDS:Chr1_A_fumigatus_Af293:639645-637892C, translated using codon table 1 (519 amino acids) Uncharacterized ORF; Ortholog(s) have glycerol-3-phosphate dehydrogenase [NAD+] activity and role in NADH oxidation, cell-abiotic substrate adhesion, glycerol biosynthetic process, intracellular accumulation of glycerol	22.0875	16.18	1	6	6	6	519	56.4221	8.19189
Afu3g08980	Afu3g08980 AspGDID:ASPL0000105299 COORDS:Chr3_A_fumigatus_Af293:2294770-2296443W, translated using codon table 1 (536 amino acids) Uncharacterized ORF; Ortholog(s) have threonine synthase activity, role in threonine biosynthetic process and cytosol, nucleus localization	21.8448	17.91	1	6	6	6	536	59.2332	6.20166
Afu1g05620	Afu1g05620 AspGDID:ASPL0000101730 COORDS:Chr1_A_fumigatus_Af293:1613252-1615558W, translated using codon table 1 (600 amino acids) Uncharacterized ORF; Ortholog(s) have phenylalanine-tRNA ligase activity, role in cellular response to drug, phenylalanyl-tRNA aminoacylation and cytosol, nucleus, phenylalanine-tRNA ligase complex localization	21.8087	17.83	1	8	8	8	600	67.8031	5.68115
Afu4g12870	Afu4g12870 AspGDID:ASPL0000106993 COORDS:Chr4_A_fumigatus_Af293:3368445-3370387W, translated using codon table 1 (602 amino acids) Uncharacterized ORF; Putative methylmalonate-semialdehyde dehydrogenase; transcript up-regulated in conidia exposed to neutrophils	21.6335	10.47	1	5	5	5	602	63.8246	8.03076
Afu5g07000	Afu5g07000 AspGDID:ASPL0000107775 COORDS:Chr5_A_fumigatus_Af293:1735022-1736346W, translated using codon table 1 (360 amino acids) Uncharacterized ORF; Puttaive NAD binding Rossmann fold oxidoreductase; transcript up-regulated in conidia exposed to neutrophils	21.4768	27.22	1	6	6	6	360	39.9447	7.03467
Afu5g07120	Afu5g07120 AspGDID:ASPL0000107787 COORDS:Chr5_A_fumigatus_Af293:1769812-1771261W, translated using codon table 1 (352 amino acids) Uncharacterized ORF; RNP domain protein; reacts with rabbit immunosera exposed to A. fumigatus conidia	21.4354	22.16	1	4	4	4	352	37.116	9.15869
Afu1g10970	Afu1g10970 AspGDID:ASPL0000102160 COORDS:Chr1_A_fumigatus_Af293:2865856-2868959W, translated using codon table 1 (955 amino acids) Uncharacterized ORF; Ortholog(s) have cytosol, plasma membrane localization	21.3447	8.8	1	6	6	6	955	106.49	5.70654
Afu2g14270	Afu2g14270 AspGDID:ASPL0000104142 COORDS:Chr2_A_fumigatus_Af293:3742174-3739906C, translated using codon table 1 (603 amino acids) Uncharacterized ORF; Putative actin-binding protein; hypoxia repressed protein	20.8294	12.94	1	6	6	7	603	65.8585	5.61768
Afu8g01670	cat2 AspGDID:ASPL0000110606 COORDS:Chr8_A_fumigatus_Af293:441545-439266C, translated using codon table 1 (759 amino acids) Verified ORF; Putative bifunctional catalase-peroxidase; induction in response to hydrogen peroxide Yap1-dependent; transcript induced by exposure to human airway epithelial cells; SrbA-regulated during hypoxia	20.7947	11.46	1	5	5	5	759	83.7098	6.58057
Afu7g05370	aspB AspGDID:ASPL0000110230 COORDS:Chr7_A_fumigatus_Af293:1290537-1292385W, translated using codon table 1 (463 amino acids) Verified ORF; Putative septin; Yap1-dependent induction in response to hydrogen peroxide; localizes to septa and to rings at the base of developing phialides; hypoxia repressed protein	20.7304	21.6	1	6	7	7	463	52.5207	6.97607
Afu3g09910	Afu3g09910 AspGDID:ASPL0000105389 COORDS:Chr3_A_fumigatus_Af293:2542185-2543380W, translated using codon table 1 (331 amino acids) Uncharacterized ORF; Ortholog(s) have phosphatidylcholine transporter activity and role in Golgi to plasma membrane transport, ascospore formation, mitotic cytokinesis, phospholipid transport, regulation of filamentous growth	20.6833	26.59	1	7	7	7	331	37.3006	5.51611
Afu6g08750	Afu6g08750 AspGDID:ASPL0000109231 COORDS:Chr6_A_fumigatus_Af293:2073566-2071674C, translated using codon table 1 (578 amino acids) Uncharacterized ORF; Ortholog(s) have role in hyphal growth and cytosol, mitochondrion localization	20.5988	17.47	1	6	6	6	578	62.9819	8.17725
Afu4g11240	aarA AspGDID:ASPL0000106833 COORDS:Chr4_A_fumigatus_Af293:2938272-2942727W, translated using codon table 1 (1425 amino acids) Uncharacterized ORF; Putative alpha-aminoadipate reductase, large subunit, involved in lysine metabolism; predicted essential gene; transcript induced by exposure to human airway epithelial cells	20.1642	5.47	1	5	5	5	1425	157.08	6.07471
Afu3g11170	Afu3g11170 AspGDID:ASPL0000105515 COORDS:Chr3_A_fumigatus_Af293:2928974-2931529W, translated using codon table 1 (759 amino acids) Uncharacterized ORF; Ortholog(s) have sequence-specific DNA binding activity and role in carotenoid biosynthetic process, circadian rhythm, conidiophore development	20.1211	10.94	1	6	7	8	759	84.1513	6.7124
Afu3g14540	hsp30 AspGDID:ASPL0000105843 COORDS:Chr3_A_fumigatus_Af293:3853746-3853204C, translated using codon table 1 (180 amino acids) Verified ORF; Putative 30-kilodalton heat shock protein; conidia-enriched protein; protein levels increase in response to amphotericin B and hydrogen peroxide	20.0541	24.44	1	4	4	6	180	20.4503	6.55127
Afu2g07520	Afu2g07520 AspGDID:ASPL0000363027 COORDS:Chr2_A_fumigatus_Af293:1926201-1928684W, translated using codon table 1 (614 amino acids) Uncharacterized ORF; Ortholog(s) have aminopeptidase activity, epoxide hydrolase activity, role in cellular lipid metabolic process, protein catabolic process and cytosol, extracellular region, nucleus localization	19.814	13.03	1	6	6	7	614	69.6784	6.21436
Afu5g02910	Afu5g02910 AspGDID:ASPL0000107470 COORDS:Chr5_A_fumigatus_Af293:772100-770907C, translated using codon table 1 (354 amino acids) Uncharacterized ORF; NAP family protein	19.8139	23.45	1	8	8	8	354	41.0408	4.50049
Afu2g07810	Afu2g07810 AspGDID:ASPL0000103501 COORDS:Chr2_A_fumigatus_Af293:1998025-1999850W, translated using codon table 1 (537 amino acids) Uncharacterized ORF; Putative cytosolic hydroxymethyltransferase	19.6769	16.95	1	4	5	5	537	58.7963	8.85107
Afu2g02050	cyp7 AspGDID:ASPL0000103035 COORDS:Chr2_A_fumigatus_Af293:509986-508618C, translated using codon table 1 (373 amino acids) Uncharacterized ORF; Putative peptidyl-prolyl cis-trans isomerase	19.5363	21.72	1	6	6	6	373	41.3168	5.98584
Afu6g03730	Afu6g03730 AspGDID:ASPL0000108828 COORDS:Chr6_A_fumigatus_Af293:823850-821958C, translated using codon table 1 (558 amino acids) Uncharacterized ORF; 2-methylcitrate dehydratase; hypoxia repressed protein; transcript up-regulated in conidia exposed to neutrophils and to human airway epithelial cells; no human homolog	19.4922	9.86	1	4	4	5	558	62.0658	8.36768
Afu2g13240	Afu2g13240 AspGDID:ASPL0000104038 COORDS:Chr2_A_fumigatus_Af293:3402661-3404769W, translated using codon table 1 (506 amino acids) Uncharacterized ORF; Putative V-type ATPase, B subunit; transcript induced by exposure to human airway epithelial cells	19.4884	14.43	1	6	6	6	506	56.383	5.99854
Afu2g04820	Afu2g04820 AspGDID:ASPL0000103307 COORDS:Chr2_A_fumigatus_Af293:1326025-1323818C, translated using codon table 1 (716 amino acids) Uncharacterized ORF; Putative translation release factor eRF3; transcript induced by exposure to human airway epithelial cells	19.3707	11.87	1	5	5	5	716	77.2757	8.04541
Afu1g12250	rcfB AspGDID:ASPL0000102291 COORDS:Chr1_A_fumigatus_Af293:3235631-3234741C, translated using codon table 1 (268 amino acids) Uncharacterized ORF; Mitochondrial hypoxia response domain protein; protein and transcript levels downregulated by caspofungin treatmen	19.3329	26.49	1	3	3	5	268	29.5042	8.85107
Afu5g00720	Afu5g00720 AspGDID:ASPL0000107256 COORDS:Chr5_A_fumigatus_Af293:204504-203702C, translated using codon table 1 (248 amino acids) Uncharacterized ORF; Has domain(s) with predicted N-acetyltransferase activity	19.1596	29.84	1	6	6	6	248	29.0426	5.32568
Afu1g15000	Afu1g15000 AspGDID:ASPL0000102567 COORDS:Chr1_A_fumigatus_Af293:4029547-4031693W, translated using codon table 1 (643 amino acids) Uncharacterized ORF; Putative isopropylmalate synthase; transcript highly induced during conidial germination; SrbA-regulated during hypoxia	19.117	11.35	1	7	7	7	643	71.1504	5.68115
Afu8g07130	Afu8g07130 AspGDID:ASPL0000111039 COORDS:Chr8_A_fumigatus_Af293:1747018-1747937W, translated using codon table 1 (267 amino acids) Verified ORF; AhpC/TSA family thioredoxin peroxidase; conidia-enriched protein; transcript up-regulated in conidia exposed to neutrophils and to human airway epithelial cells	19.0185	21.72	1	5	5	5	267	29.5877	9.24658
Afu2g07680	sidA AspGDID:ASPL0000103489 COORDS:Chr2_A_fumigatus_Af293:1961124-1959561C, translated using codon table 1 (501 amino acids) Verified ORF; L-ornithine N5-oxygenase; first committed step in siderophore biosynthesis; essential for virulence; induced by exposure to human airway epithelial cells; expression up-regulated by iron starvation; activated by L-arginine; SrbA-regulated	18.9998	21.36	1	8	8	8	501	56.841	8.6167
Afu3g07820	Afu3g07820 AspGDID:ASPL0000105186 COORDS:Chr3_A_fumigatus_Af293:1972540-1971051C, translated using codon table 1 (439 amino acids) Uncharacterized ORF; Ortholog(s) have role in positive regulation of RNA polymerase II transcriptional preinitiation complex assembly, positive regulation of protein catabolic process and proteasome regulatory particle assembly, <a href="#GOsection">more</a>	18.9928	14.58	1	6	6	7	439	48.8533	7.66455
Afu1g08840	Afu1g08840 AspGDID:ASPL0000101950 COORDS:Chr1_A_fumigatus_Af293:2290909-2291935W, translated using codon table 1 (228 amino acids) Uncharacterized ORF; Ortholog(s) have guanylate kinase activity, role in GMP metabolic process and cytoplasm, nucleus localization	18.9098	34.65	1	6	6	6	228	25.5231	7.43018
Afu8g04810	Afu8g04810 AspGDID:ASPL0000110815 COORDS:Chr8_A_fumigatus_Af293:1104248-1103015C, translated using codon table 1 (336 amino acids) Uncharacterized ORF; Ortholog(s) have role in circadian regulation of gene expression, conidium formation, establishment or maintenance of bipolar cell polarity regulating cell shape and protein phosphorylation, <a href="#GOsection">more</a>	18.8925	16.37	1	3	3	4	336	39.5131	7.31299
Afu1g06790	Afu1g06790 AspGDID:ASPL0000101847 COORDS:Chr1_A_fumigatus_Af293:1937397-1941009W, translated using codon table 1 (1095 amino acids) Uncharacterized ORF; Ortholog(s) have role in protein import into nucleus, regulation of mitotic cell cycle and cytosol, nuclear membrane, nucleolus localization	18.8417	7.21	1	6	6	6	1095	121.355	4.76709
Afu5g12780	Afu5g12780 AspGDID:ASPL0000108332 COORDS:Chr5_A_fumigatus_Af293:3352075-3353129W, translated using codon table 1 (332 amino acids) Uncharacterized ORF; Ortholog of <i>A. nidulans FGSC A4</i> : AN8430, <i>A. niger CBS 513.88</i> : An18g00330, <i>A. oryzae RIB40</i> : AO090010000134, <i>Neosartorya fischeri NRRL 181</i> : NFIA_074390 and <i>Aspergillus wentii</i> : Aspwe1_0449405	18.5752	23.19	1	7	7	7	332	35.7809	5.31299
Afu2g11940	ade13 AspGDID:ASPL0000103908 COORDS:Chr2_A_fumigatus_Af293:3080820-3078848C, translated using codon table 1 (483 amino acids) Uncharacterized ORF; Adenylosuccinate lyase; reacts with rabbit immunosera exposed to A. fumigatus conidia	18.3426	14.08	1	6	6	6	483	54.6911	6.55127
Afu4g03630	erg6 AspGDID:ASPL0000106182 COORDS:Chr4_A_fumigatus_Af293:1025739-1024484C, translated using codon table 1 (377 amino acids) Uncharacterized ORF; Putative sterol 24-C-methyltransferase with a predicted role in ergosterol biosynthesis; transcript downregulated in response to amphotericin B; induced by exposure to artemisinin; SrbA-regulated during hypoxia	18.2239	23.61	1	5	5	5	377	42.5439	6.43018
Afu1g02670	Afu1g02670 AspGDID:ASPL0000101437 COORDS:Chr1_A_fumigatus_Af293:776882-775673C, translated using codon table 1 (320 amino acids) Uncharacterized ORF; ARP2/3 complex 34 kDa subunit; hypoxia induced protein	18.1128	23.13	1	5	5	5	320	36.915	6.87354
Afu1g02980	Afu1g02980 AspGDID:ASPL0000101468 COORDS:Chr1_A_fumigatus_Af293:854826-855623W, translated using codon table 1 (265 amino acids) Uncharacterized ORF; Putative 6-phosphogluconolactonase; calcium downregulated	18.0077	21.13	1	5	5	5	265	28.8198	6.27783
Afu5g09250	Afu5g09250 AspGDID:ASPL0000107994 COORDS:Chr5_A_fumigatus_Af293:2380881-2384038W, translated using codon table 1 (980 amino acids) Uncharacterized ORF; Ortholog(s) have cytosol localization	17.8102	10.51	1	8	8	8	980	108.614	6.29053
Afu4g10050	Afu4g10050 AspGDID:ASPL0000106719 COORDS:Chr4_A_fumigatus_Af293:2602022-2602919W, translated using codon table 1 (149 amino acids) Uncharacterized ORF; Calmodulin	17.6839	34.23	1	4	5	6	149	17.0019	4.27197
Afu6g06780	rpt4 AspGDID:ASPL0000109040 COORDS:Chr6_A_fumigatus_Af293:1481801-1483206W, translated using codon table 1 (393 amino acids) Uncharacterized ORF; Proteasome regulatory particle subunit; transcript induced by exposure to human airway epithelial cells	17.2773	13.74	1	3	4	5	393	44.0853	5.80811
Afu4g07580	Afu4g07580 AspGDID:ASPL0000106473 COORDS:Chr4_A_fumigatus_Af293:1969969-1971642W, translated using codon table 1 (516 amino acids) Uncharacterized ORF; Translation initiation factor EF-2 gamma subunit	17.0968	13.37	1	5	5	5	516	56.1044	7.09326
Afu3g11300	prs2 AspGDID:ASPL0000105528 COORDS:Chr3_A_fumigatus_Af293:2959483-2958408C, translated using codon table 1 (254 amino acids) Uncharacterized ORF; Putative proteasome component	17.0963	25.59	1	6	6	6	254	27.9201	6.37939
Afu1g11420	Afu1g11420 AspGDID:ASPL0000102205 COORDS:Chr1_A_fumigatus_Af293:3010805-3006406C, translated using codon table 1 (1378 amino acids) Uncharacterized ORF; Ortholog(s) have mRNA 5'-UTR binding, translation repressor activity, nucleic acid binding activity	17.095	5.22	1	5	5	5	1378	152.19	7.56201
Afu1g13740	Afu1g13740 AspGDID:ASPL0000102442 COORDS:Chr1_A_fumigatus_Af293:3658931-3663766W, translated using codon table 1 (1578 amino acids) Uncharacterized ORF; Predicted pentafunctional polypeptide; predicted essential gene	16.997	4.82	1	5	5	5	1578	171.364	6.68311
Afu6g08920	Afu6g08920 AspGDID:ASPL0000109248 COORDS:Chr6_A_fumigatus_Af293:2125824-2122684C, translated using codon table 1 (1046 amino acids) Uncharacterized ORF; Assimilatory sulfite reductase	16.9552	6.41	1	5	5	5	1046	114.548	5.13525
Afu2g11290	Afu2g11290 AspGDID:ASPL0000103844 COORDS:Chr2_A_fumigatus_Af293:2910595-2909789C, translated using codon table 1 (246 amino acids) Uncharacterized ORF; Orotate phosphoribosyltransferase 1; role in pyrimidine base biosynthesis; no human homolog	16.8958	26.83	1	6	6	6	246	26.0468	6.56592
Afu2g08970	Afu2g08970 AspGDID:ASPL0000103615 COORDS:Chr2_A_fumigatus_Af293:2301289-2299406C, translated using codon table 1 (519 amino acids) Uncharacterized ORF; Ortholog(s) have cytosol localization	16.8673	11.95	1	4	4	4	519	55.0988	5.97314
Afu6g03810	Afu6g03810 AspGDID:ASPL0000108836 COORDS:Chr6_A_fumigatus_Af293:840093-839212C, translated using codon table 1 (255 amino acids) Uncharacterized ORF; Putative mitochondrial ATP synthase D chain; hypoxia induced protein	16.8066	28.24	1	5	5	5	255	28.6782	9.0415
Afu5g03690	Afu5g03690 AspGDID:ASPL0000107547 COORDS:Chr5_A_fumigatus_Af293:987794-986454C, translated using codon table 1 (424 amino acids) Uncharacterized ORF; Ortholog(s) have phosphatidylinositol transporter activity	16.6896	22.64	1	6	6	6	424	46.141	4.84326
Afu2g02560	Afu2g02560 AspGDID:ASPL0000103086 COORDS:Chr2_A_fumigatus_Af293:659395-662458W, translated using codon table 1 (916 amino acids) Uncharacterized ORF; Ortholog(s) have role in establishment or maintenance of cell polarity and cytosol localization	16.6328	6.99	1	5	5	5	916	100.615	5.65576
Afu5g06500	Afu5g06500 AspGDID:ASPL0000107726 COORDS:Chr5_A_fumigatus_Af293:1587081-1588611W, translated using codon table 1 (447 amino acids) Uncharacterized ORF; Acyl-CoA dehydrogenase family protein with a predicted role in fatty acid beta oxidation; induced by exposure to artemisinin	16.4902	14.32	1	5	5	5	447	49.1848	8.90967
Afu5g11240	Afu5g11240 AspGDID:ASPL0000108183 COORDS:Chr5_A_fumigatus_Af293:2877011-2875843C, translated using codon table 1 (311 amino acids) Uncharacterized ORF; Ortholog(s) have carbonyl reductase (NADPH) activity, oxidoreductase activity, acting on the aldehyde or oxo group of donors, NAD or NADP as acceptor activity and cytosol, nucleus, ribosome localization	16.4163	24.76	1	4	4	4	311	33.6528	8.98291
Afu3g08640	Afu3g08640 AspGDID:ASPL0000105266 COORDS:Chr3_A_fumigatus_Af293:2213730-2212518C, translated using codon table 1 (340 amino acids) Uncharacterized ORF; Ortholog(s) have sequence-specific DNA binding activity and role in cellular response to drug, cellular response to osmotic stress, translational initiation	16.2317	23.24	1	5	5	5	340	37.6889	6.69775
Afu7g02310	Afu7g02310 AspGDID:ASPL0000110026 COORDS:Chr7_A_fumigatus_Af293:629238-628529C, translated using codon table 1 (217 amino acids) Uncharacterized ORF; Putative adenine phosphoribosyltransferase 1; transcript induced by exposure to human airway epithelial cells; induced by gliotoxin exposure	16.222	29.49	1	4	4	4	217	23.6063	6.39209
Afu5g09860	Afu5g09860 AspGDID:ASPL0000108054 COORDS:Chr5_A_fumigatus_Af293:2552613-2551525C, translated using codon table 1 (287 amino acids) Uncharacterized ORF; Putative esterase	16.182	19.16	1	4	4	5	287	31.5205	6.72705
Afu5g05500	Afu5g05500 AspGDID:ASPL0000107629 COORDS:Chr5_A_fumigatus_Af293:1277444-1278887W, translated using codon table 1 (424 amino acids) Uncharacterized ORF; Ortholog(s) have phosphoglycerate dehydrogenase activity, role in serine family amino acid biosynthetic process and cytosol localization	16.1522	14.39	1	5	5	5	424	45.8868	7.00537
Afu5g09210	alp2 AspGDID:ASPL0000107990 COORDS:Chr5_A_fumigatus_Af293:2366798-2365176C, translated using codon table 1 (495 amino acids) Verified ORF; Autophagic (vacuolar) serine protease; allergen Asp f 18; predicted signal sequence for secretion; transcript induced by growth on hydrogen peroxide; transcript up-regulated in conidia exposed to neutrophils	15.9464	14.34	1	4	4	4	495	52.6075	6.25244
Afu6g01940	Afu6g01940 AspGDID:ASPL0000108649 COORDS:Chr6_A_fumigatus_Af293:282872-284077W, translated using codon table 1 (317 amino acids) Uncharacterized ORF; Dienelactone hydrolase family protein; transcript up-regulated in conidia exposed to neutrophils	15.7692	20.19	1	6	6	6	317	34.9877	8.5874
Afu6g06580	Afu6g06580 AspGDID:ASPL0000109019 COORDS:Chr6_A_fumigatus_Af293:1433532-1432446C, translated using codon table 1 (269 amino acids) Uncharacterized ORF; Ortholog(s) have phosphomannomutase activity, role in ER to Golgi vesicle-mediated transport, establishment or maintenance of cell polarity, nuclear envelope organization, protein targeting to ER and cytosol, nucleus localization	15.7434	27.51	1	6	6	6	269	30.5733	5.66846
Afu4g04318	Afu4g04318 AspGDID:ASPL0000366886 COORDS:Chr4_A_fumigatus_Af293:1217563-1217111C, translated using codon table 1 (111 amino acids) Uncharacterized ORF; Ortholog of <i>A. nidulans FGSC A4</i> : AN7011, <i>A. niger CBS 513.88</i> : An14g00530, <i>Aspergillus wentii</i> : Aspwe1_0053203, <i>Aspergillus sydowii</i> : Aspsy1_0184132 and <i>Aspergillus terreus NIH2624</i> : ATET_02726	15.6709	41.44	1	3	3	4	111	11.343	7.38623
Afu7g03740	cyp51B AspGDID:ASPL0000110069 COORDS:Chr7_A_fumigatus_Af293:806031-804301C, translated using codon table 1 (524 amino acids) Verified ORF; Putative 14-alpha demethylase with a predicted role in ergosterol biosynthesis; transcript upregulated in response to amphotericin B; SrbA-regulated during hypoxia	15.6684	13.74	1	5	5	5	524	58.8932	7.75244
Afu5g08290	Afu5g08290 AspGDID:ASPL0000107901 COORDS:Chr5_A_fumigatus_Af293:2105292-2104352C, translated using codon table 1 (283 amino acids) Uncharacterized ORF; Ortholog(s) have intracellular localization	15.6658	21.55	1	6	6	6	283	31.3553	6.69775
Afu6g13140	Afu6g13140 AspGDID:ASPL0000109656 COORDS:Chr6_A_fumigatus_Af293:3322359-3321489C, translated using codon table 1 (232 amino acids) Uncharacterized ORF; Ortholog(s) have 3,4-dihydroxy-2-butanone-4-phosphate synthase activity, role in aerobic respiration, riboflavin biosynthetic process and cytosol, mitochondrial intermembrane space, nucleus localization	15.3085	17.24	1	3	3	4	232	25.2938	5.03369
Afu5g09400	Afu5g09400 AspGDID:ASPL0000108009 COORDS:Chr5_A_fumigatus_Af293:2418391-2419402W, translated using codon table 1 (294 amino acids) Uncharacterized ORF; Putative carbonyl reductase; transcript up-regulated in conidia exposed to neutrophils	15.2886	18.03	1	4	4	5	294	31.4496	6.30322
Afu6g00660	Afu6g00660 AspGDID:ASPL0000108620 COORDS:Chr6_A_fumigatus_Af293:170160-171220W, translated using codon table 1 (322 amino acids) Uncharacterized ORF; Ortholog(s) have role in asperthecin biosynthetic process	15.2672	15.84	1	4	4	5	322	35.7539	5.51611
Afu2g16020	Afu2g16020 AspGDID:ASPL0000104319 COORDS:Chr2_A_fumigatus_Af293:4237810-4239808W, translated using codon table 1 (566 amino acids) Uncharacterized ORF; Putative heat shock protein; transcript induced during conidial germination	15.2107	9.72	1	4	4	4	566	61.6862	6.87354
Afu3g07790	Afu3g07790 AspGDID:ASPL0000105183 COORDS:Chr3_A_fumigatus_Af293:1963894-1965412W, translated using codon table 1 (464 amino acids) Uncharacterized ORF; Argininosuccinate lyase; hypoxia induced protein	14.8802	11.85	1	6	6	6	464	51.8196	6.27783
Afu1g14570	Afu1g14570 AspGDID:ASPL0000102524 COORDS:Chr1_A_fumigatus_Af293:3892553-3895217W, translated using codon table 1 (872 amino acids) Uncharacterized ORF; Putative phosphoribosyl-AMP cyclohydrolase; no human homolog	14.8491	9.29	1	5	5	6	872	92.8238	5.65576
Afu1g08790	Afu1g08790 AspGDID:ASPL0000101945 COORDS:Chr1_A_fumigatus_Af293:2260124-2263969W, translated using codon table 1 (1072 amino acids) Uncharacterized ORF; Ortholog(s) have nuclear export signal receptor activity	14.7073	5.5	1	6	6	6	1072	123.425	5.43994
Afu2g10010	Afu2g10010 AspGDID:ASPL0000103716 COORDS:Chr2_A_fumigatus_Af293:2564207-2567853W, translated using codon table 1 (1048 amino acids) Uncharacterized ORF; Ortholog(s) have cytosol, nuclear envelope localization	14.6856	5.82	1	4	4	4	1048	118.882	4.84326
Afu1g04540	Afu1g04540 AspGDID:ASPL0000101622 COORDS:Chr1_A_fumigatus_Af293:1284032-1285205W, translated using codon table 1 (323 amino acids) Uncharacterized ORF; NADH-cytochrome b5 reductase involved in oxidative phosphorylation; hypoxia induced protein; induced by exposure to artemisinin	14.4491	13.62	1	3	3	4	323	36.151	9.0415
Afu3g06610	Afu3g06610 AspGDID:ASPL0000105072 COORDS:Chr3_A_fumigatus_Af293:1639448-1641145W, translated using codon table 1 (508 amino acids) Uncharacterized ORF; Proteasome regulatory particle subunit; transcript induced by exposure to human airway epithelial cells	14.3694	10.63	1	5	5	5	508	58.4077	7.18115
Afu1g05610	Afu1g05610 AspGDID:ASPL0000101729 COORDS:Chr1_A_fumigatus_Af293:1612356-1610038C, translated using codon table 1 (616 amino acids) Verified ORF; Putative protein phosphotase 2a 65kd regulatory subunit; conidia-enriched protein; protein induced by heat shock	14.321	11.2	1	5	5	5	616	69.1473	4.85596
Afu1g06210	agm1 AspGDID:ASPL0000101789 COORDS:Chr1_A_fumigatus_Af293:1791710-1793700W, translated using codon table 1 (566 amino acids) Verified ORF; N-acetylphosphoglucosamine mutase, involved in chitin biosynthesis; essential	14.2952	11.48	1	4	4	5	566	61.4774	6.11279
Afu3g10360	Afu3g10360 AspGDID:ASPL0000105434 COORDS:Chr3_A_fumigatus_Af293:2688254-2685337C, translated using codon table 1 (878 amino acids) Uncharacterized ORF; Ortholog(s) have protein transporter activity and role in ascospore formation, intracellular protein transport, protein retention in Golgi apparatus, retrograde transport, endosome to Golgi	14.2768	4.33	1	3	3	4	878	99.6631	5.96045
Afu5g02850	Afu5g02850 AspGDID:ASPL0000107464 COORDS:Chr5_A_fumigatus_Af293:754834-756051W, translated using codon table 1 (324 amino acids) Uncharacterized ORF; Has domain(s) with predicted arylformamidase activity and role in tryptophan catabolic process to kynurenine	14.0746	20.37	1	5	5	6	324	36.303	5.21143
Afu4g12850	clxA AspGDID:ASPL0000106991 COORDS:Chr4_A_fumigatus_Af293:3365625-3367567W, translated using codon table 1 (563 amino acids) Verified ORF; Calnexin, ER membrane chaperone involved in folding of glycoproteins directed to the secretory pathway; hypoxia repressed; enriched in dormant conidia	14.0434	11.55	1	6	6	6	563	61.8151	5.07178
Afu6g04970	Afu6g04970 AspGDID:ASPL0000108951 COORDS:Chr6_A_fumigatus_Af293:1181194-1182540W, translated using codon table 1 (428 amino acids) Uncharacterized ORF; Ortholog(s) have O-phospho-L-serine:2-oxoglutarate aminotransferase activity, role in L-serine biosynthetic process, purine nucleobase biosynthetic process and cytosol localization	13.9568	12.15	1	4	4	4	428	46.8644	6.81494
Afu1g04950	glcA AspGDID:ASPL0000101664 COORDS:Chr1_A_fumigatus_Af293:1412013-1410732C, translated using codon table 1 (323 amino acids) Uncharacterized ORF; Ortholog(s) have protein serine/threonine phosphatase activity	13.9022	19.81	1	3	3	3	323	37.0616	5.78271
Afu4g07210	Afu4g07210 AspGDID:ASPL0000106435 COORDS:Chr4_A_fumigatus_Af293:1872976-1871931C, translated using codon table 1 (327 amino acids) Uncharacterized ORF; Mitochondrial acetolactate synthase small subunit; hypoxia induced protein; SrbA-regulated during hypoxia	13.7326	13.46	1	3	3	4	327	35.5515	6.85889
Afu1g14850	Afu1g14850 AspGDID:ASPL0000102552 COORDS:Chr1_A_fumigatus_Af293:3980051-3981525W, translated using codon table 1 (437 amino acids) Uncharacterized ORF; Putative acyl-coA dehydrogenase with a predicted role in beta oxidation of fatty acids; transcript up-regulated in conidia exposed to neutrophils	13.7305	13.5	1	3	3	3	437	47.4243	6.94678
Afu2g11475	Afu2g11475 AspGDID:ASPL0000363557 COORDS:Chr2_A_fumigatus_Af293:2956635-2957821W, translated using codon table 1 (305 amino acids) Uncharacterized ORF; Ortholog(s) have role in endocytosis, establishment or maintenance of actin cytoskeleton polarity, vacuole organization and integral component of Golgi membrane localization	13.7278	17.38	1	3	3	3	305	33.5423	5.2749
Afu2g11440	pup2 AspGDID:ASPL0000103858 COORDS:Chr2_A_fumigatus_Af293:2945654-2946723W, translated using codon table 1 (250 amino acids) Uncharacterized ORF; Putative proteasome component; reacts with rabbit immunosera exposed to A. fumigatus conidia	13.6831	21.6	1	4	4	4	250	27.3116	4.85596
Afu5g13920	wos2 AspGDID:ASPL0000108443 COORDS:Chr5_A_fumigatus_Af293:3643780-3644692W, translated using codon table 1 (201 amino acids) Uncharacterized ORF; Putative Hsp90 binding co-chaperone; reacts with rabbit immunosera exposed to A. fumigatus conidia	13.6377	34.83	1	4	4	4	201	22.1986	4.4751
Afu1g04820	Afu1g04820 AspGDID:ASPL0000101651 COORDS:Chr1_A_fumigatus_Af293:1367321-1366072C, translated using codon table 1 (350 amino acids) Uncharacterized ORF; D-xylose reductase	13.5993	19.14	1	4	4	4	350	39.7594	6.55127
Afu5g07020	Afu5g07020 AspGDID:ASPL0000107777 COORDS:Chr5_A_fumigatus_Af293:1738915-1740843W, translated using codon table 1 (622 amino acids) Uncharacterized ORF; Ribosome biogenesis ABC transporter	13.5396	10.13	1	5	5	5	622	69.7026	6.65381
Afu3g10000	pkaR AspGDID:ASPL0000105398 COORDS:Chr3_A_fumigatus_Af293:2570161-2571402W, translated using codon table 1 (413 amino acids) Verified ORF; cAMP-dependent protein kinase regulatory subunit; induced by endothelial cells and human airway epithelial cells; mutants sensitive to storage in water and contain more nuclei than wild-type; up-regulated in neutrophil-exposed conidia	13.4567	12.11	1	3	3	3	413	44.5042	5.18604
Afu1g09830	Afu1g09830 AspGDID:ASPL0000102049 COORDS:Chr1_A_fumigatus_Af293:2550807-2551983W, translated using codon table 1 (348 amino acids) Uncharacterized ORF; Ortholog(s) have protein complex scaffold activity, role in posttranslational protein targeting to membrane, response to heat and TRC complex, nucleus localization	13.4075	19.54	1	4	4	4	348	36.3346	5.021
Afu6g07620	Afu6g07620 AspGDID:ASPL0000109122 COORDS:Chr6_A_fumigatus_Af293:1731263-1729750C, translated using codon table 1 (437 amino acids) Uncharacterized ORF; GDP-mannose pyrophosphorylase A; repressed by exposure to artemisinin	13.3958	13.96	1	4	4	4	437	48.2561	7.29834
Afu3g06260	Afu3g06260 AspGDID:ASPL0000105037 COORDS:Chr3_A_fumigatus_Af293:1548887-1549628W, translated using codon table 1 (114 amino acids) Uncharacterized ORF; Ortholog(s) have translation initiation factor binding activity and cytosol, multi-eIF complex, nucleus localization	13.2234	31.58	1	4	4	4	114	13.0458	8.60205
Afu6g08360	Afu6g08360 AspGDID:ASPL0000109193 COORDS:Chr6_A_fumigatus_Af293:1958167-1959214W, translated using codon table 1 (332 amino acids) Uncharacterized ORF; Thiazole biosynthesis enzyme; hypoxia induced protein; induced by gliotoxin exposure	12.9403	16.87	1	4	4	4	332	35.469	5.84619
Afu6g08660	Afu6g08660 AspGDID:ASPL0000109222 COORDS:Chr6_A_fumigatus_Af293:2052348-2048629C, translated using codon table 1 (1239 amino acids) Uncharacterized ORF; Ortholog of <i>A. nidulans</i> AN3906; hypoxia repressed protein	12.8921	4.12	1	3	3	3	1239	131.817	5.09717
Afu2g15590	Afu2g15590 AspGDID:ASPL0000104276 COORDS:Chr2_A_fumigatus_Af293:4110503-4115286W, translated using codon table 1 (1523 amino acids) Uncharacterized ORF; Putative sulphite reductase	12.8656	4.2	1	5	5	5	1523	167.42	6.02393
Afu6g03540	acuE AspGDID:ASPL0000108809 COORDS:Chr6_A_fumigatus_Af293:768975-770805W, translated using codon table 1 (539 amino acids) Verified ORF; Putative malate synthase; protein abundant in conidia	12.8511	11.13	1	4	4	4	539	61.0212	8.11865
Afu2g09850	Afu2g09850 AspGDID:ASPL0000103701 COORDS:Chr2_A_fumigatus_Af293:2516744-2518045W, translated using codon table 1 (355 amino acids) Uncharacterized ORF; Putative oxidoreductase, 2-nitropropane dioxygenase family; transcript up-regulated in conidia exposed to neutrophils	12.6029	16.34	1	4	4	4	355	37.6787	7.02002
Afu5g10640	Afu5g10640 AspGDID:ASPL0000108128 COORDS:Chr5_A_fumigatus_Af293:2721762-2723271W, translated using codon table 1 (391 amino acids) Uncharacterized ORF; Ortholog(s) have tyrosine-tRNA ligase activity, role in tyrosyl-tRNA aminoacylation and cytosol, nucleus localization	12.6011	13.81	1	5	5	5	391	43.5878	6.58057
Afu4g07650	cyp6 AspGDID:ASPL0000106480 COORDS:Chr4_A_fumigatus_Af293:1987776-1988776W, translated using codon table 1 (209 amino acids) Uncharacterized ORF; Putative peptidyl-prolyl cis-trans isomerase	12.2272	17.7	1	3	3	3	209	22.9459	8.27979
Afu8g05330	Afu8g05330 AspGDID:ASPL0000110863 COORDS:Chr8_A_fumigatus_Af293:1242642-1243783W, translated using codon table 1 (298 amino acids) Uncharacterized ORF; Putative methylenetetrahydrofolate dehydrogenase	12.0901	11.41	1	3	3	4	298	33.0434	6.53662
Afu5g06040	Afu5g06040 AspGDID:ASPL0000107681 COORDS:Chr5_A_fumigatus_Af293:1435345-1436944W, translated using codon table 1 (376 amino acids) Uncharacterized ORF; Ortholog(s) have ubiquitin binding activity, role in negative regulation of protein catabolic process, nucleotide-excision repair, protein ubiquitination and cytosol, nuclear envelope localization	12.0726	13.03	1	3	3	3	376	39.8048	4.64014
Afu5g07890	Afu5g07890 AspGDID:ASPL0000107861 COORDS:Chr5_A_fumigatus_Af293:1979250-1978604C, translated using codon table 1 (149 amino acids) Uncharacterized ORF; Putative single-stranded DNA binding protein family member	12.0483	34.9	1	4	4	4	149	16.2432	9.68604
Afu3g06530	sC AspGDID:ASPL0000105064 COORDS:Chr3_A_fumigatus_Af293:1618981-1616721C, translated using codon table 1 (574 amino acids) Uncharacterized ORF; Putative ATP sulfurylase; sulfate adenylyltransferase; reacts with rabbit immunosera exposed to A. fumigatus conidia; hypoxia repressed protein	11.9525	7.49	1	3	3	3	574	64.2932	7.06396
Afu6g13330	Afu6g13330 AspGDID:ASPL0000109674 COORDS:Chr6_A_fumigatus_Af293:3382648-3383137W, translated using codon table 1 (112 amino acids) Verified ORF; Putative RNA binding protein of unknown function; conidia-enriched protein; transcript up-regulated in conidia exposed to neutrophils	11.8401	37.5	1	2	2	2	112	12.4831	6.15088
Afu7g02230	Afu7g02230 AspGDID:ASPL0000110018 COORDS:Chr7_A_fumigatus_Af293:599410-600851W, translated using codon table 1 (418 amino acids) Uncharacterized ORF; Ortholog(s) have mRNA binding activity, role in arginine catabolic process, positive regulation of cellular response to oxidative stress, positive regulation of nuclear-transcribed mRNA poly(A) tail shortening and cytosol localization	11.6031	7.42	1	2	2	3	418	44.8172	5.75732
Afu4g07190	argB AspGDID:ASPL0000106433 COORDS:Chr4_A_fumigatus_Af293:1868021-1866906C, translated using codon table 1 (371 amino acids) Verified ORF; Ornathine carbamoyltransferase, enzyme of the arginine biosynthesis pathway; hypoxia induced protein	11.5969	12.67	1	3	3	3	371	40.0877	7.89893
Afu5g03520	Afu5g03520 AspGDID:ASPL0000107530 COORDS:Chr5_A_fumigatus_Af293:949870-951084W, translated using codon table 1 (323 amino acids) Verified ORF; Immunoreactive secreted protein	11.5678	18.27	1	4	4	4	323	35.4962	6.46826
Afu3g09280	Afu3g09280 AspGDID:ASPL0000105325 COORDS:Chr3_A_fumigatus_Af293:2354001-2355185W, translated using codon table 1 (308 amino acids) Uncharacterized ORF; Has domain(s) with predicted ribosome binding, translation initiation factor activity, role in regulation of translational initiation and eukaryotic translation initiation factor 3 complex localization	11.5563	16.56	1	3	3	3	308	34.3175	5.26221
Afu6g12740	Afu6g12740 AspGDID:ASPL0000109617 COORDS:Chr6_A_fumigatus_Af293:3219940-3220875W, translated using codon table 1 (245 amino acids) Uncharacterized ORF; Dienelactone hydrolase family protein	11.5425	18.78	1	4	4	4	245	26.9258	6.63916
Afu4g10010	Afu4g10010 AspGDID:ASPL0000106715 COORDS:Chr4_A_fumigatus_Af293:2593720-2595242W, translated using codon table 1 (487 amino acids) Uncharacterized ORF; Ortholog(s) have heat shock protein binding activity, role in protein folding, regulation of mitotic cell cycle and cytosol, nucleus localization	11.4877	10.47	1	3	3	3	487	54.4855	4.99561
Afu3g11640	Afu3g11640 AspGDID:ASPL0000105562 COORDS:Chr3_A_fumigatus_Af293:3058607-3059789W, translated using codon table 1 (368 amino acids) Uncharacterized ORF; Homoserine dehydrogenase; no human homolog	11.4438	12.77	1	4	4	4	368	38.4803	5.87158
Afu2g13710	Afu2g13710 AspGDID:ASPL0000104086 COORDS:Chr2_A_fumigatus_Af293:3562035-3560485C, translated using codon table 1 (470 amino acids) Uncharacterized ORF; NADH-ubiquinone oxidoreductase 49 kDa subunit	11.3564	10.85	1	4	4	4	470	52.8217	6.65381
Afu5g09910	Afu5g09910 AspGDID:ASPL0000108059 COORDS:Chr5_A_fumigatus_Af293:2564144-2563392C, translated using codon table 1 (217 amino acids) Uncharacterized ORF; Putative p-nitroreductase family protein; protein induced by heat shock; Yap1-dependent induction in response to hydrogen peroxide; induced by gliotoxin exposure	11.3537	25.35	1	5	5	5	217	24.2985	5.90967
Afu4g04660	Afu4g04660 AspGDID:ASPL0000106283 COORDS:Chr4_A_fumigatus_Af293:1312437-1311087C, translated using codon table 1 (389 amino acids) Uncharacterized ORF; Ortholog(s) have protein domain specific binding activity	11.3293	10.8	1	3	4	4	389	43.423	8.17725
Afu1g13780	Afu1g13780 AspGDID:ASPL0000102446 COORDS:Chr1_A_fumigatus_Af293:3681048-3680611C, translated using codon table 1 (103 amino acids) Uncharacterized ORF; Has domain(s) with predicted DNA binding, protein heterodimerization activity, role in DNA-templated transcription, initiation, nucleosome assembly and nucleosome, nucleus localization	11.2275	29.13	1	3	3	4	103	11.3634	11.356
Afu3g05730	Afu3g05730 AspGDID:ASPL0000104987 COORDS:Chr3_A_fumigatus_Af293:1399574-1398507C, translated using codon table 1 (313 amino acids) Uncharacterized ORF; Nicotinate mononucleotide pyrophosphorylase; no human homolog	11.1949	14.38	1	3	3	3	313	33.2609	6.53662
Afu2g15870	Afu2g15870 AspGDID:ASPL0000104304 COORDS:Chr2_A_fumigatus_Af293:4194874-4191631C, translated using codon table 1 (1039 amino acids) Uncharacterized ORF; Ortholog(s) have cytosol, nuclear envelope localization	11.1907	3.08	1	2	2	3	1039	114.292	4.65283
Afu1g02890	Afu1g02890 AspGDID:ASPL0000101459 COORDS:Chr1_A_fumigatus_Af293:829952-830818W, translated using codon table 1 (250 amino acids) Uncharacterized ORF; Ortholog(s) have dUTP diphosphatase activity	11.0834	18.4	1	3	3	3	250	26.4869	8.88037
Afu2g14960	Afu2g14960 AspGDID:ASPL0000104211 COORDS:Chr2_A_fumigatus_Af293:3942076-3942959W, translated using codon table 1 (271 amino acids) Uncharacterized ORF; Ortholog(s) have RNA polymerase II activating transcription factor binding, disulfide oxidoreductase activity	11.0256	16.24	1	3	3	3	271	28.7907	4.90674
Afu3g06460	Afu3g06460 AspGDID:ASPL0000105057 COORDS:Chr3_A_fumigatus_Af293:1595883-1595178C, translated using codon table 1 (144 amino acids) Uncharacterized ORF; Protein of unknown function; hypoxia induced protein	10.9719	28.47	1	3	3	3	144	16.3873	9.33447
Afu1g10810	Afu1g10810 AspGDID:ASPL0000102144 COORDS:Chr1_A_fumigatus_Af293:2821017-2822416W, translated using codon table 1 (391 amino acids) Uncharacterized ORF; Ortholog(s) have role in calcium ion transport into cytosol and cytosol, plasma membrane localization	10.6825	10.74	1	3	3	3	391	44.1257	6.96143
Afu1g06190	rmtA AspGDID:ASPL0000101787 COORDS:Chr1_A_fumigatus_Af293:1789312-1787900C, translated using codon table 1 (353 amino acids) Uncharacterized ORF; Histone H4 arginine methyltransferase	10.5917	6.8	1	2	2	3	353	40.258	5.2749
Afu6g04730	Afu6g04730 AspGDID:ASPL0000108927 COORDS:Chr6_A_fumigatus_Af293:1109697-1112290W, translated using codon table 1 (817 amino acids) Uncharacterized ORF; Ortholog(s) have phosphoribosylamine-glycine ligase activity, phosphoribosylformylglycinamidine cyclo-ligase activity	10.402	4.53	1	2	2	2	817	86.3647	5.50342
Afu4g04410	Afu4g04410 AspGDID:ASPL0000106258 COORDS:Chr4_A_fumigatus_Af293:1247460-1248557W, translated using codon table 1 (319 amino acids) Uncharacterized ORF; Immunoreactive protein; has predicted 3-hydroxyacyl-CoA dehydrogenase activity, coenzyme binding, nucleotide binding activity and a putative role in fatty acid metabolism	10.3233	14.73	1	3	3	3	319	33.6826	7.37158
Afu4g09750	Afu4g09750 AspGDID:ASPL0000106689 COORDS:Chr4_A_fumigatus_Af293:2539039-2539733W, translated using codon table 1 (187 amino acids) Uncharacterized ORF; Ortholog(s) have role in aerobic respiration and mitochondrial nucleoid, mitochondrial ribosome localization	10.2353	18.72	1	2	2	2	187	19.7125	8.73389
Afu4g07130	mvd1 AspGDID:ASPL0000106427 COORDS:Chr4_A_fumigatus_Af293:1851690-1852972W, translated using codon table 1 (404 amino acids) Uncharacterized ORF; Diphosphomevalonate decarboxylase; SrbA-regulated during hypoxia	10.2285	10.15	1	3	3	3	404	43.1272	6.01123
Afu6g09330	Afu6g09330 AspGDID:ASPL0000109287 COORDS:Chr6_A_fumigatus_Af293:2227723-2229437W, translated using codon table 1 (468 amino acids) Uncharacterized ORF; Protein of unknown function	10.1201	10.04	1	3	3	3	468	54.5045	5.021
Afu5g10650	Afu5g10650 AspGDID:ASPL0000108129 COORDS:Chr5_A_fumigatus_Af293:2725117-2723747C, translated using codon table 1 (412 amino acids) Uncharacterized ORF; Has domain(s) with predicted FMN binding, oxidoreductase activity, oxidoreductase activity, acting on the CH-NH2 group of donors, pyridoxamine-phosphate oxidase activity	10.0778	10.92	1	3	3	3	412	45.9339	6.25244
Afu2g04700	Afu2g04700 AspGDID:ASPL0000103296 COORDS:Chr2_A_fumigatus_Af293:1283529-1287638W, translated using codon table 1 (1310 amino acids) Uncharacterized ORF; Ortholog(s) have role in cellular response to heat and cytosol, endoplasmic reticulum, nuclear outer membrane-endoplasmic reticulum membrane network localization	10.0638	3.97	1	3	3	3	1310	142.343	7.1958
Afu6g03750	Afu6g03750 AspGDID:ASPL0000108830 COORDS:Chr6_A_fumigatus_Af293:827896-829831W, translated using codon table 1 (583 amino acids) Uncharacterized ORF; Ortholog(s) have amidophosphoribosyltransferase activity, role in 'de novo' IMP biosynthetic process, adenine metabolic process and cytoplasm localization	9.98935	6	1	2	2	2	583	64.0024	6.58057
Afu1g10820	Afu1g10820 AspGDID:ASPL0000102145 COORDS:Chr1_A_fumigatus_Af293:2823301-2822605C, translated using codon table 1 (211 amino acids) Uncharacterized ORF; Ortholog(s) have adenylylsulfate kinase activity	9.89326	15.64	1	2	2	2	211	23.5834	6.96143
Afu5g07300	Afu5g07300 AspGDID:ASPL0000107804 COORDS:Chr5_A_fumigatus_Af293:1814759-1815768W, translated using codon table 1 (260 amino acids) Uncharacterized ORF; Electron transfer flavoprotein, beta subunit	9.87921	14.62	1	3	3	3	260	28.2232	8.96826
Afu2g02780	Afu2g02780 AspGDID:ASPL0000103108 COORDS:Chr2_A_fumigatus_Af293:722347-721173C, translated using codon table 1 (355 amino acids) Uncharacterized ORF; Ortholog(s) have mRNA binding activity, role in negative regulation of MAPK cascade and cytosol localization	9.7831	10.7	1	3	3	3	355	37.8871	6.18896
Afu7g02020	Afu7g02020 AspGDID:ASPL0000109997 COORDS:Chr7_A_fumigatus_Af293:544081-544744W, translated using codon table 1 (105 amino acids) Uncharacterized ORF; Has domain(s) with predicted hydrolase activity, acting on acid anhydrides, catalyzing transmembrane movement of substances activity, role in proton transport and vacuolar proton-transporting V-type ATPase complex localization	9.77426	28.57	1	2	2	4	105	11.7859	5.21143
Afu4g11390	Afu4g11390 AspGDID:ASPL0000106848 COORDS:Chr4_A_fumigatus_Af293:2987902-2988695W, translated using codon table 1 (158 amino acids) Uncharacterized ORF; Ubiquinol-cytochrome c reductase complex 17 kd protein with a predicted role in oxidative phosphorylation	9.69272	15.19	1	2	2	3	158	17.8838	4.09424
Afu6g06350	Afu6g06350 AspGDID:ASPL0000108996 COORDS:Chr6_A_fumigatus_Af293:1349712-1348557C, translated using codon table 1 (298 amino acids) Uncharacterized ORF; Proteasome subunit alpha type 3; reacts with rabbit immunosera exposed to A. fumigatus conidia	9.63198	16.11	1	4	4	4	298	31.8111	5.21143
Afu2g11020	Afu2g11020 AspGDID:ASPL0000103817 COORDS:Chr2_A_fumigatus_Af293:2831951-2831088C, translated using codon table 1 (287 amino acids) Verified ORF; Putative triose-phosphate isomerase; mutation causes increased azole resistance	9.6078	15.33	1	4	4	4	287	30.4561	5.35107
Afu2g04940	Afu2g04940 AspGDID:ASPL0000103319 COORDS:Chr2_A_fumigatus_Af293:1358892-1357362C, translated using codon table 1 (470 amino acids) Uncharacterized ORF; Ortholog(s) have mRNA binding activity, role in telomere maintenance via telomere shortening and cytoplasm, nucleus localization	9.53988	9.57	1	3	3	3	470	49.135	7.72314
Afu5g10610	rip1 AspGDID:ASPL0000108125 COORDS:Chr5_A_fumigatus_Af293:2715644-2714448C, translated using codon table 1 (298 amino acids) Uncharacterized ORF; Ubiquinol-cytochrome c reductase iron-sulphur subunit precursor with a predicted role in oxidative phosphorylation; hypoxia induced protein; induced by exposure to artemisinin; SrbA-regulated during hypoxia	9.53453	16.44	1	3	3	3	298	32.5887	8.95361
Afu7g05930	mepB AspGDID:ASPL0000110285 COORDS:Chr7_A_fumigatus_Af293:1452895-1455148W, translated using codon table 1 (716 amino acids) Verified ORF; Putative metallopeptidase with similarity to mammalian thimet oligopeptidases; conidia-enriched protein; transcript induced by exposure to human airway epithelial cells and by growth on BSA as a sole nitrogen source	9.19497	5.03	1	3	3	3	716	81.8584	5.78271
Afu6g10610	Afu6g10610 AspGDID:ASPL0000109416 COORDS:Chr6_A_fumigatus_Af293:2625814-2626707W, translated using codon table 1 (272 amino acids) Uncharacterized ORF; Putative ribose 5-phosphate isomerase A	9.09879	13.6	1	3	3	3	272	28.359	6.25244
Afu6g12680	Afu6g12680 AspGDID:ASPL0000109611 COORDS:Chr6_A_fumigatus_Af293:3202825-3203845W, translated using codon table 1 (135 amino acids) Uncharacterized ORF; Ortholog(s) have hydrolase activity, role in nucleotide metabolic process and cytoplasm, nucleus localization	9.04253	22.22	1	3	3	3	135	14.9728	6.87354
Afu3g10630	Afu3g10630 AspGDID:ASPL0000105461 COORDS:Chr3_A_fumigatus_Af293:2747083-2747630W, translated using codon table 1 (123 amino acids) Uncharacterized ORF; Ortholog(s) have mitochondrion localization	8.94733	33.33	1	2	2	3	123	13.5657	4.88135
Afu2g04680	pakA AspGDID:ASPL0000103294 COORDS:Chr2_A_fumigatus_Af293:1275738-1273126C, translated using codon table 1 (815 amino acids) Uncharacterized ORF; Protein serine/threonine kinase; similar to Ste20, a sexual development regulator	8.9311	8.71	1	4	4	4	815	89.6158	9.43701
Afu1g09280	ptcB AspGDID:ASPL0000101994 COORDS:Chr1_A_fumigatus_Af293:2407312-2409143W, translated using codon table 1 (429 amino acids) Verified ORF; Putative type 2C protein phosphatase (PP2C) involved in dephosphorylation of SakA MAP kinase in response to osmotic stress	8.88509	7.93	1	3	3	3	429	46.5624	4.79248
Afu2g12400	Afu2g12400 AspGDID:ASPL0000103954 COORDS:Chr2_A_fumigatus_Af293:3185304-3186292W, translated using codon table 1 (227 amino acids) Uncharacterized ORF; Putative ATP synthase oligomycin sensitivity conferral protein	8.78417	7.05	1	2	2	2	227	24.3742	9.64209
Afu4g10790	Afu4g10790 AspGDID:ASPL0000106792 COORDS:Chr4_A_fumigatus_Af293:2820022-2821193W, translated using codon table 1 (320 amino acids) Uncharacterized ORF; Ortholog(s) have ribose phosphate diphosphokinase activity, role in 5-phosphoribose 1-diphosphate biosynthetic process, cellular response to drug, cytokinesis, fungal-type cell wall organization and cytosol localization	8.77386	10	1	2	2	2	320	34.9771	7.50342
Afu2g11260	luA AspGDID:ASPL0000103841 COORDS:Chr2_A_fumigatus_Af293:2894027-2896466W, translated using codon table 1 (777 amino acids) Uncharacterized ORF; Putative 3-isopropylmalate dehydratase with a predicted role in nitrogen metabolism; protein induced by heat shock; SrbA-regulated during hypoxia	8.76318	4.5	1	3	3	3	777	84.0235	5.93506
Afu3g13820	Afu3g13820 AspGDID:ASPL0000105775 COORDS:Chr3_A_fumigatus_Af293:3651038-3650223C, translated using codon table 1 (201 amino acids) Uncharacterized ORF; Putative HET-C2 protein; transcript induced by exposure to human airway epithelial cells	8.69075	12.94	1	2	2	2	201	22.1986	6.94678
Afu1g11480	Afu1g11480 AspGDID:ASPL0000102211 COORDS:Chr1_A_fumigatus_Af293:3031787-3030921C, translated using codon table 1 (168 amino acids) Uncharacterized ORF; Protein of unknown function; transcript up-regulated in conidia exposed to neutrophils	8.6781	25.6	1	2	2	2	168	18.216	5.52881
Afu6g10990	Afu6g10990 AspGDID:ASPL0000109452 COORDS:Chr6_A_fumigatus_Af293:2708263-2706119C, translated using codon table 1 (695 amino acids) Uncharacterized ORF; Ortholog(s) have NADPH-hemoprotein reductase activity, role in cellular response to drug and endoplasmic reticulum localization	8.57572	6.33	1	4	4	4	695	76.7347	5.57959
Afu3g08940	Afu3g08940 AspGDID:ASPL0000105295 COORDS:Chr3_A_fumigatus_Af293:2286027-2286949W, translated using codon table 1 (280 amino acids) Uncharacterized ORF; Ortholog(s) have role in ubiquitin-dependent protein catabolic process and nucleus, proteasome regulatory particle, lid subcomplex, proteasome storage granule localization	8.40194	15	1	3	3	3	280	31.1431	4.99561
Afu3g12270	Afu3g12270 AspGDID:ASPL0000105623 COORDS:Chr3_A_fumigatus_Af293:3237221-3238007W, translated using codon table 1 (235 amino acids) Uncharacterized ORF; Putative glutathione peroxidase; peroxiredoxin; transcript upregulated in hyphae exposed to neutrophils	8.30679	11.49	1	2	2	2	235	25.7393	9.21729
Afu5g07050	Afu5g07050 AspGDID:ASPL0000107780 COORDS:Chr5_A_fumigatus_Af293:1745205-1746800W, translated using codon table 1 (463 amino acids) Uncharacterized ORF; Proteasome regulatory particle subunit; transcript induced by exposure to human airway epithelial cells	8.26006	7.13	1	2	2	2	463	51.4175	5.75732
Afu5g06060	skpA AspGDID:ASPL0000107683 COORDS:Chr5_A_fumigatus_Af293:1441806-1442525W, translated using codon table 1 (158 amino acids) Verified ORF; Putative sulfur metabolism regulator; higher expression in 48 h biofilm vs planktonic cells	8.04473	26.58	1	2	2	2	158	18.1299	4.4751
Afu7g01840	Afu7g01840 AspGDID:ASPL0000109979 COORDS:Chr7_A_fumigatus_Af293:496331-491364C, translated using codon table 1 (1522 amino acids) Uncharacterized ORF; Ortholog(s) have Golgi apparatus, cell tip, cytoplasmic vesicle, endoplasmic reticulum, plasma membrane localization	8.04334	6.04	1	5	5	5	1522	168.412	6.21436
Afu4g10780	Afu4g10780 AspGDID:ASPL0000106791 COORDS:Chr4_A_fumigatus_Af293:2806494-2819008W, translated using codon table 1 (4039 amino acids) Uncharacterized ORF; Ortholog(s) have role in mRNA export from nucleus and nucleus localization	8.03015	0.89	1	4	4	4	4039	450.543	4.99561
Afu1g06300	Afu1g06300 AspGDID:ASPL0000101798 COORDS:Chr1_A_fumigatus_Af293:1808539-1809878W, translated using codon table 1 (424 amino acids) Uncharacterized ORF; Ortholog(s) have cytosol, nucleus localization	7.92186	6.13	1	2	2	2	424	47.5936	5.41455
Afu3g10740	Afu3g10740 AspGDID:ASPL0000105472 COORDS:Chr3_A_fumigatus_Af293:2782828-2781858C, translated using codon table 1 (262 amino acids) Uncharacterized ORF; Putative RAB GTPase with a predicted role in regulation of endocytosis; transcript downregulated in response to amphotericin B	7.88669	11.45	1	3	3	3	262	27.5867	4.84326
Afu2g14810	Afu2g14810 AspGDID:ASPL0000104195 COORDS:Chr2_A_fumigatus_Af293:3911893-3910175C, translated using codon table 1 (572 amino acids) Uncharacterized ORF; Ortholog(s) have role in cellular response to hyperoxia, <a href="#GOsection">more</a>	7.85895	7.52	1	3	3	3	572	64.2815	4.64014
Afu2g03490	Afu2g03490 AspGDID:ASPL0000103178 COORDS:Chr2_A_fumigatus_Af293:921519-923827W, translated using codon table 1 (645 amino acids) Uncharacterized ORF; Putative calcium/calmodulin-dependent protein kinase; calcium induced; transcript induced by exposure to human airway epithelial cells	7.82253	4.96	1	2	2	2	645	72.0815	6.87354
Afu2g14210	ilv3 AspGDID:ASPL0000104136 COORDS:Chr2_A_fumigatus_Af293:3721264-3723226W, translated using codon table 1 (606 amino acids) Verified ORF; Putative mitochondrial dihydroxy acid dehydratase; hypoxia induced protein; induced by exposure to human airway epithelial cells; required for virulence	7.73466	5.12	1	2	2	2	606	64.7161	7.6499
Afu4g07030	Afu4g07030 AspGDID:ASPL0000106417 COORDS:Chr4_A_fumigatus_Af293:1822621-1823518W, translated using codon table 1 (252 amino acids) Uncharacterized ORF; Transcript up-regulated in conidia exposed to neutrophils	7.71677	11.9	1	3	3	3	252	27.8691	8.71924
Afu3g06110	Afu3g06110 AspGDID:ASPL0000105022 COORDS:Chr3_A_fumigatus_Af293:1507370-1509490W, translated using codon table 1 (638 amino acids) Uncharacterized ORF; Has domain(s) with predicted enzyme regulator activity, role in regulation of protein catabolic process and proteasome complex localization	7.71134	5.17	1	2	2	2	638	70.7152	7.15186
Afu4g08600	Afu4g08600 AspGDID:ASPL0000106573 COORDS:Chr4_A_fumigatus_Af293:2225523-2227284W, translated using codon table 1 (550 amino acids) Uncharacterized ORF; Putative aldehyde dehydrogenase (NAD(P)+)	7.70429	8.55	1	4	4	4	550	60.0219	6.96143
Afu5g08270	Afu5g08270 AspGDID:ASPL0000107899 COORDS:Chr5_A_fumigatus_Af293:2100834-2100024C, translated using codon table 1 (244 amino acids) Uncharacterized ORF; Putative HAD superfamily hydrolase; hypoxia repressed protein	7.68242	11.89	1	2	2	2	244	27.343	5.04639
Afu4g06140	Afu4g06140 AspGDID:ASPL0000106331 COORDS:Chr4_A_fumigatus_Af293:1576220-1573718C, translated using codon table 1 (780 amino acids) Uncharacterized ORF; Ortholog(s) have dipeptidyl-peptidase activity and cytoplasm, nucleus localization	7.6753	3.85	1	2	2	2	780	87.2208	6.68311
Afu3g09030	Afu3g09030 AspGDID:ASPL0000105302 COORDS:Chr3_A_fumigatus_Af293:2303487-2302210C, translated using codon table 1 (310 amino acids) Uncharacterized ORF; Ortholog(s) have role in aerobic respiration, penicillin biosynthetic process and mitochondrial matrix localization	7.62334	11.29	1	2	2	2	310	34.8563	4.65283
Afu5g05680	Afu5g05680 AspGDID:ASPL0000107645 COORDS:Chr5_A_fumigatus_Af293:1322763-1324274W, translated using codon table 1 (464 amino acids) Uncharacterized ORF; Ortholog(s) have translation release factor activity, codon specific activity and role in asexual sporulation resulting in formation of a cellular spore, cellular response to nitrogen starvation, cytokinesis, translational termination	7.54963	10.56	1	3	3	3	464	51.8989	6.48096
Afu2g03580	Afu2g03580 AspGDID:ASPL0000103185 COORDS:Chr2_A_fumigatus_Af293:953968-955580W, translated using codon table 1 (518 amino acids) Uncharacterized ORF; Ortholog(s) have phenylalanine-tRNA ligase activity, role in phenylalanyl-tRNA aminoacylation and cytosol, phenylalanine-tRNA ligase complex localization	7.41211	6.37	1	3	3	3	518	58.509	7.44482
Afu2g03140	Afu2g03140 AspGDID:ASPL0000103143 COORDS:Chr2_A_fumigatus_Af293:823665-822897C, translated using codon table 1 (211 amino acids) Uncharacterized ORF; Ortholog(s) have peptide-methionine (S)-S-oxide reductase activity, role in cellular response to hydrogen peroxide and cytosol, nucleus localization	7.38591	12.8	1	2	2	2	211	23.5745	7.1958
Afu1g12590	Afu1g12590 AspGDID:ASPL0000102327 COORDS:Chr1_A_fumigatus_Af293:3325919-3324668C, translated using codon table 1 (398 amino acids) Uncharacterized ORF; La protein homolog	7.33052	8.79	1	2	2	2	398	44.5277	7.89893
Afu4g05830	idi2 AspGDID:ASPL0000106300 COORDS:Chr4_A_fumigatus_Af293:1486303-1487520W, translated using codon table 1 (387 amino acids) Uncharacterized ORF; Protein of unknown function; induced by hydrogen peroxide; transcript induced by exposure to human airway epithelial cells	7.16626	7.49	1	2	2	2	387	41.5649	6.3667
Afu2g09870	tif35 AspGDID:ASPL0000103703 COORDS:Chr2_A_fumigatus_Af293:2523373-2524473W, translated using codon table 1 (290 amino acids) Uncharacterized ORF; Eukaryotic translation initiation factor 3 subunit G	7.14231	11.72	1	3	3	3	290	31.8511	8.79248
Afu5g06710	Afu5g06710 AspGDID:ASPL0000107747 COORDS:Chr5_A_fumigatus_Af293:1646867-1648603W, translated using codon table 1 (475 amino acids) Uncharacterized ORF; Ortholog(s) have cytosol, nucleus localization	7.05151	9.47	1	3	3	3	475	53.6043	5.24951
Afu5g00650	Afu5g00650 AspGDID:ASPL0000107249 COORDS:Chr5_A_fumigatus_Af293:183963-182941C, translated using codon table 1 (340 amino acids) Uncharacterized ORF; Protein of unknown function; transcript induced by exposure to human airway epithelial cells	6.99306	7.65	1	3	3	3	340	38.2843	6.45557
Afu1g09470	Afu1g09470 AspGDID:ASPL0000102013 COORDS:Chr1_A_fumigatus_Af293:2448655-2447399C, translated using codon table 1 (386 amino acids) Uncharacterized ORF; Putative class V aminotransferase; transcript up-regulated in conidia exposed to neutrophils	6.98747	6.99	1	2	2	2	386	41.8237	6.96143
Afu4g06790	Afu4g06790 AspGDID:ASPL0000106393 COORDS:Chr4_A_fumigatus_Af293:1755480-1756006W, translated using codon table 1 (93 amino acids) Uncharacterized ORF; Ubiquinol-cytochrome c reductase complex 14 kDa protein with a predicted role in oxidative phosphorylation; induced by exposure to artemisinin	6.97075	43.01	1	2	2	2	93	11.0149	6.31592
Afu3g14660	Afu3g14660 AspGDID:ASPL0000105855 COORDS:Chr3_A_fumigatus_Af293:3885807-3885533C, translated using codon table 1 (85 amino acids) Uncharacterized ORF; Ortholog of <i>A. nidulans FGSC A4</i> : AN2535, <i>A. niger CBS 513.88</i> : An09g01230, <i>Aspergillus wentii</i> : Aspwe1_0107397, Aspwe1_0171355 and <i>Aspergillus sydowii</i> : Aspsy1_0087029	6.94662	38.82	1	2	2	2	85	9.02357	5.14795
Afu6g04800	Afu6g04800 AspGDID:ASPL0000108934 COORDS:Chr6_A_fumigatus_Af293:1125396-1124178C, translated using codon table 1 (281 amino acids) Uncharacterized ORF; Ortholog(s) have role in response to purine-containing compound and cytoplasm, nucleus localization	6.90448	8.9	1	2	2	2	281	30.7338	9.17334
Afu6g06500	Afu6g06500 AspGDID:ASPL0000109011 COORDS:Chr6_A_fumigatus_Af293:1401790-1403080W, translated using codon table 1 (363 amino acids) Uncharacterized ORF; Actin-related protein 2/3 complex subunit 1A; transcript up-regulated in conidia exposed to neutrophils	6.86425	9.92	1	3	3	3	363	39.959	7.03467
Afu1g03060	Afu1g03060 AspGDID:ASPL0000101476 COORDS:Chr1_A_fumigatus_Af293:882423-883672W, translated using codon table 1 (322 amino acids) Uncharacterized ORF; Ortholog(s) have actin filament binding activity and role in actomyosin contractile ring contraction, barbed-end actin filament capping, cellular protein localization, filamentous growth, mitotic cytokinesis	6.79485	7.45	1	2	2	2	322	36.3642	5.59229
Afu3g10700	Afu3g10700 AspGDID:ASPL0000105468 COORDS:Chr3_A_fumigatus_Af293:2775082-2775739W, translated using codon table 1 (193 amino acids) Uncharacterized ORF; Ortholog(s) have mRNA binding, structural molecule activity and role in Arp2/3 complex-mediated actin nucleation, actin cortical patch assembly, cellular response to drug, mitochondrion inheritance	6.52308	13.47	1	2	2	2	193	20.5543	5.60498
Afu2g11340	Afu2g11340 AspGDID:ASPL0000103849 COORDS:Chr2_A_fumigatus_Af293:2922123-2921251C, translated using codon table 1 (248 amino acids) Uncharacterized ORF; Ortholog(s) have role in intracellular sterol transport and fungal-type vacuole lumen localization	6.50361	8.06	1	2	2	2	248	27.2728	5.93506
Afu1g00500	Afu1g00500 AspGDID:ASPL0000101222 COORDS:Chr1_A_fumigatus_Af293:156782-155568C, translated using codon table 1 (404 amino acids) Uncharacterized ORF; FMN dependent dehydrogenase; SrbA-regulated during hypoxia	6.12154	7.92	1	2	2	2	404	44.7888	6.34131
Afu1g06240	Afu1g06240 AspGDID:ASPL0000101792 COORDS:Chr1_A_fumigatus_Af293:1798799-1797872C, translated using codon table 1 (233 amino acids) Uncharacterized ORF; Ortholog(s) have riboflavin synthase activity, role in riboflavin biosynthetic process and cytosol, nucleus localization	6.108	18.88	1	3	3	3	233	25.235	5.32568
Afu2g03400	Afu2g03400 AspGDID:ASPL0000103169 COORDS:Chr2_A_fumigatus_Af293:896513-897792W, translated using codon table 1 (335 amino acids) Uncharacterized ORF; Ortholog(s) have ubiquitin-specific protease activity and role in cellular response to drug, mitochondrial fission, peroxisome fission, proteasome-mediated ubiquitin-dependent protein catabolic process, protein deubiquitination	6.10797	7.76	1	2	2	2	335	37.4139	6.20166
Afu5g09640	Afu5g09640 AspGDID:ASPL0000108033 COORDS:Chr5_A_fumigatus_Af293:2490603-2492299W, translated using codon table 1 (501 amino acids) Uncharacterized ORF; Ortholog of <i>A. nidulans FGSC A4</i> : AN8797/mvlA, <i>A. niger CBS 513.88</i> : An07g03220, <i>A. oryzae RIB40</i> : AO090020000593, <i>Aspergillus wentii</i> : Aspwe1_0100097 and <i>Aspergillus sydowii</i> : Aspsy1_0159449	6.04332	7.78	1	2	2	2	501	55.0593	6.81494
Afu6g12500	Afu6g12500 AspGDID:ASPL0000109594 COORDS:Chr6_A_fumigatus_Af293:3156604-3155495C, translated using codon table 1 (220 amino acids) Uncharacterized ORF; Ortholog(s) have cytosol, mitochondrion, nucleus localization	6.02739	9.09	1	2	2	2	220	23.7052	8.38232
Afu2g15290	Afu2g15290 AspGDID:ASPL0000104246 COORDS:Chr2_A_fumigatus_Af293:4053500-4054061W, translated using codon table 1 (136 amino acids) Verified ORF; Conidia-enriched protein of unknown function; transcript downregulated in response to voriconazole; hypoxia repressed protein	5.96118	27.94	1	2	2	2	136	14.8394	6.75635
Afu3g10300	Afu3g10300 AspGDID:ASPL0000105428 COORDS:Chr3_A_fumigatus_Af293:2667473-2665767C, translated using codon table 1 (524 amino acids) Uncharacterized ORF; Putative galactokinase with a role in galactose catabolism; transcript up-regulated in conidia exposed to neutrophils	5.85517	6.3	1	3	3	3	524	57.6085	6.65381
Afu7g01000	Afu7g01000 AspGDID:ASPL0000109896 COORDS:Chr7_A_fumigatus_Af293:269163-267518C, translated using codon table 1 (493 amino acids) Uncharacterized ORF; Putative alcohol dehydrogenase involved in ethanol metabolism; predicted gene pair with AFUA_6G11430 (aldA); increased expression in biofilm; induced by L-tyrosine; induced in neutrophil-exposed conidia; repressed by gliotoxin exposure	5.84021	7.91	1	1	3	3	493	53.7258	6.60986
Afu6g12580	Afu6g12580 AspGDID:ASPL0000109601 COORDS:Chr6_A_fumigatus_Af293:3181167-3179379C, translated using codon table 1 (517 amino acids) Uncharacterized ORF; Ortholog(s) have anthranilate synthase activity, role in cleistothecium development, tryptophan biosynthetic process and anthranilate synthase complex, cytosol, nucleus localization	5.67683	4.64	1	2	2	2	517	56.9834	6.01123
Afu2g11840	cyc8 AspGDID:ASPL0000103898 COORDS:Chr2_A_fumigatus_Af293:3056794-3059852W, translated using codon table 1 (867 amino acids) Verified ORF; Transcriptional corepressor; ortholog of <i>A. nidulans</i> ssnF; calcium induced; mutation causes increased azole sensitivity	5.3786	2.77	1	2	2	2	867	94.5764	6.72705
Afu1g02190	rab11 AspGDID:ASPL0000101389 COORDS:Chr1_A_fumigatus_Af293:648599-649525W, translated using codon table 1 (210 amino acids) Uncharacterized ORF; Ras GTPase; hypoxia repressed protein	5.28101	16.19	1	3	3	3	210	23.2808	5.68115
Afu3g10460	ntf2 AspGDID:ASPL0000105444 COORDS:Chr3_A_fumigatus_Af293:2708847-2709680W, translated using codon table 1 (124 amino acids) Uncharacterized ORF; Putative nuclear transport factor	5.24112	12.9	1	2	2	2	124	14.1939	4.75439
Afu6g04430	Afu6g04430 AspGDID:ASPL0000108897 COORDS:Chr6_A_fumigatus_Af293:1013586-1012672C, translated using codon table 1 (228 amino acids) Uncharacterized ORF; Ortholog(s) have acireductone dioxygenase (Ni2+-requiring) activity, role in L-methionine biosynthetic process from methylthioadenosine and cytosol, nucleus localization	5.21572	9.21	1	2	2	2	228	26.3281	6.23975
Afu4g11910	Afu4g11910 AspGDID:ASPL0000106899 COORDS:Chr4_A_fumigatus_Af293:3145186-3142526C, translated using codon table 1 (841 amino acids) Uncharacterized ORF; Ortholog(s) have cytoplasm localization	5.15612	2.62	1	2	2	2	841	95.5556	6.97607
Afu7g03990	ura6 AspGDID:ASPL0000110094 COORDS:Chr7_A_fumigatus_Af293:896510-895803C, translated using codon table 1 (235 amino acids) Uncharacterized ORF; Uridylate kinase; induced by gliotoxin exposure	5.12353	9.36	1	2	2	2	235	25.5441	5.80811
Afu1g02540	Afu1g02540 AspGDID:ASPL0000101424 COORDS:Chr1_A_fumigatus_Af293:743597-739485C, translated using codon table 1 (1258 amino acids) Uncharacterized ORF; Ortholog(s) have ubiquitin binding activity, role in endocytosis, endoplasmic reticulum unfolded protein response and actin cortical patch, cellular bud neck, cellular bud tip, mating projection tip localization	4.91589	3.02	1	3	3	3	1258	133.303	4.86865
Afu2g07350	Afu2g07350 AspGDID:ASPL0000103458 COORDS:Chr2_A_fumigatus_Af293:1876933-1878405W, translated using codon table 1 (456 amino acids) Uncharacterized ORF; Ortholog(s) have glutamate-5-semialdehyde dehydrogenase activity, role in proline biosynthetic process and cytosol, nucleus localization	4.75007	13.16	1	4	4	4	456	48.7838	5.94775
Afu2g03040	Afu2g03040 AspGDID:ASPL0000103133 COORDS:Chr2_A_fumigatus_Af293:787407-788437W, translated using codon table 1 (192 amino acids) Uncharacterized ORF; Ribosomal protein L34	4.56435	8.85	1	2	2	2	192	21.4242	9.49561
Afu2g15660	Afu2g15660 AspGDID:ASPL0000104283 COORDS:Chr2_A_fumigatus_Af293:4137098-4138646W, translated using codon table 1 (471 amino acids) Uncharacterized ORF; Has domain(s) with predicted oxidoreductase activity, oxidoreductase activity, acting on the aldehyde or oxo group of donors, NAD or NADP as acceptor activity and role in oxidation-reduction process	4.48004	3.82	1	2	2	2	471	51.7428	5.96045
Afu7g06010	Afu7g06010 AspGDID:ASPL0000110293 COORDS:Chr7_A_fumigatus_Af293:1472458-1471853C, translated using codon table 1 (182 amino acids) Uncharacterized ORF; Ortholog(s) have mitochondrion localization	4.29546	14.84	1	2	2	2	182	19.5816	9.70068
Afu6g03590	mcsA AspGDID:ASPL0000108814 COORDS:Chr6_A_fumigatus_Af293:783347-784866W, translated using codon table 1 (465 amino acids) Verified ORF; Methylcitrate synthase; catalyses the condensation of propionyl-CoA and oxaloacetate to methylcitrate; conidia-enriched protein; mutants killed more readily by alveolar macrophages and show decreased virulence in mice	3.42872	8.82	1	2	2	2	465	51.3799	8.93896
Afu2g02150	S10a AspGDID:ASPL0000103045 COORDS:Chr2_A_fumigatus_Af293:536724-537226W, translated using codon table 1 (116 amino acids) Uncharacterized ORF; Putative ribosomal protein S10	3.17677	16.38	1	2	2	2	116	13.0562	9.71533
Afu5g02150	pre6 AspGDID:ASPL0000107395 COORDS:Chr5_A_fumigatus_Af293:548545-547635C, translated using codon table 1 (251 amino acids) Uncharacterized ORF; Putative proteasome component; reacts with rabbit immunosera exposed to A. fumigatus conidia; transcript induced by exposure to human airway epithelial cells	3.01159	9.16	1	2	2	2	251	27.4313	7.94287
Afu6g06345	Afu6g06345 AspGDID:ASPL0000108995 COORDS:Chr6_A_fumigatus_Af293:1347575-1348344W, translated using codon table 1 (205 amino acids) Uncharacterized ORF; Ortholog(s) have 6,7-dimethyl-8-ribityllumazine synthase activity, role in riboflavin biosynthetic process and mitochondrial intermembrane space, nucleus localization	2.40359	10.73	1	2	2	2	205	21.5393	6.1001
Afu1g05310	Afu1g05310 AspGDID:ASPL0000101699 COORDS:Chr1_A_fumigatus_Af293:1529654-1532946W, translated using codon table 1 (1066 amino acids) Uncharacterized ORF; Ortholog(s) have role in cellular response to nitrogen starvation, negative regulation of G0 to G1 transition, ribosomal small subunit biogenesis and 90S preribosome, nucleolus localization	2.2274	1.59	1	2	2	2	1066	119.041	7.28369
Afu3g07140	fluG AspGDID:ASPL0000105125 COORDS:Chr3_A_fumigatus_Af293:1793857-1791143C, translated using codon table 1 (864 amino acids) Verified ORF; Upstream activator of conidiation; required for proper regulation of brlA transcript levels; calcium induced	2.21726	2.2	1	2	2	2	864	96.9362	5.69385

## Sheet: SakA GFP CR_60 min
Accession	Description	Score	Coverage	# Proteins	# Unique Peptides	# Peptides	# PSMs	# AAs	MW [kDa]	calc. pI
Afu3g06550	Afu3g06550 AspGDID:ASPL0000105066 COORDS:Chr3_A_fumigatus_Af293:1623469-1625008W, translated using codon table 1 (469 amino acids) Uncharacterized ORF; Has domain(s) with predicted phosphatase activity, phosphoserine phosphatase activity and role in L-serine biosynthetic process, metabolic process	206.073	84.86	1	24	24	43	469	51.8419	5.89697
Afu1g12940	sakA AspGDID:ASPL0000102362 COORDS:Chr1_A_fumigatus_Af293:3428181-3429807W, translated using codon table 1 (366 amino acids) Verified ORF; Putative mitogen-activated protein kinase (MAPK) with predicted roles in the osmotic and oxidative stress responses; involved in sensing nitrogen in the medium	416.32	77.32	1	22	22	135	366	41.9334	5.60498
Afu2g12910	Afu2g12910 AspGDID:ASPL0000104004 COORDS:Chr2_A_fumigatus_Af293:3311664-3309244C, translated using codon table 1 (741 amino acids) Uncharacterized ORF; Ortholog of <i>A. nidulans FGSC A4</i> : AN6264, <i>A. niger CBS 513.88</i> : An02g01620, <i>A. oryzae RIB40</i> : AO090026000343, <i>Aspergillus wentii</i> : Aspwe1_0117790 and <i>Aspergillus sydowii</i> : Aspsy1_0151049	51.5859	22.67	1	11	11	13	741	80.0612	10.0229
Afu3g12530	pkhB AspGDID:ASPL0000105649 COORDS:Chr3_A_fumigatus_Af293:3318837-3312900C, translated using codon table 1 (1937 amino acids) Uncharacterized ORF; Putative sensor histidine kinase/response regulator; transcript induced by exposure to human airway epithelial cells	21.0373	7.74	1	11	11	11	1937	213.382	6.52197
Afu1g15450	Afu1g15450 AspGDID:ASPL0000102610 COORDS:Chr1_A_fumigatus_Af293:4172637-4171167C, translated using codon table 1 (424 amino acids) Uncharacterized ORF; Ortholog(s) have adenylosuccinate synthase activity, sulfinylpropanyl adenylate synthase activity	19.5595	29.01	1	11	11	11	424	46.6189	6.90283
Afu2g03490	Afu2g03490 AspGDID:ASPL0000103178 COORDS:Chr2_A_fumigatus_Af293:921519-923827W, translated using codon table 1 (645 amino acids) Uncharacterized ORF; Putative calcium/calmodulin-dependent protein kinase; calcium induced; transcript induced by exposure to human airway epithelial cells	36.2606	20.62	1	9	9	11	645	72.0815	6.87354
Afu2g07620	Afu2g07620 AspGDID:ASPL0000103483 COORDS:Chr2_A_fumigatus_Af293:1942912-1941117C, translated using codon table 1 (534 amino acids) Uncharacterized ORF; Cystathionine beta-synthase; transcript induced by exposure to human airway epithelial cells	28.7249	22.66	1	8	8	8	534	57.7783	6.97607
Afu3g01580	Afu3g01580 AspGDID:ASPL0000104678 COORDS:Chr3_A_fumigatus_Af293:397771-395356C, translated using codon table 1 (646 amino acids) Uncharacterized ORF; Putative glucose-methanol-choline (GMC) oxidoreductase; protein induced by hydrogen peroxide; hypoxia induced protein; repressed by gliotoxin exposure	27.3745	17.96	1	8	8	8	646	72.1047	7.41553
Afu6g03440	Afu6g03440 AspGDID:ASPL0000108799 COORDS:Chr6_A_fumigatus_Af293:738342-736781C, translated using codon table 1 (497 amino acids) Uncharacterized ORF; Putative fructosyl amine; transcript induced by voriconazole	21.4948	18.71	1	7	7	7	497	54.895	5.75732
Afu2g04680	pakA AspGDID:ASPL0000103294 COORDS:Chr2_A_fumigatus_Af293:1275738-1273126C, translated using codon table 1 (815 amino acids) Uncharacterized ORF; Protein serine/threonine kinase; similar to Ste20, a sexual development regulator	20.719	15.58	1	7	7	8	815	89.6158	9.43701
Afu7g02230	Afu7g02230 AspGDID:ASPL0000110018 COORDS:Chr7_A_fumigatus_Af293:599410-600851W, translated using codon table 1 (418 amino acids) Uncharacterized ORF; Ortholog(s) have mRNA binding activity, role in arginine catabolic process, positive regulation of cellular response to oxidative stress, positive regulation of nuclear-transcribed mRNA poly(A) tail shortening and cytosol localization	19.7235	19.62	1	6	6	7	418	44.8172	5.75732
Afu2g11450	Afu2g11450 AspGDID:ASPL0000103859 COORDS:Chr2_A_fumigatus_Af293:2948560-2946986C, translated using codon table 1 (524 amino acids) Uncharacterized ORF; Has domain(s) with predicted methyltransferase activity	17.8021	16.6	1	5	5	5	524	57.6007	9.67139
Afu6g03460	Afu6g03460 AspGDID:ASPL0000108801 COORDS:Chr6_A_fumigatus_Af293:741171-742895W, translated using codon table 1 (574 amino acids) Uncharacterized ORF; Has domain(s) with predicted ATP binding activity	12.7064	11.32	1	4	4	4	574	63.4223	6.13818
Afu5g00720	Afu5g00720 AspGDID:ASPL0000107256 COORDS:Chr5_A_fumigatus_Af293:204504-203702C, translated using codon table 1 (248 amino acids) Uncharacterized ORF; Has domain(s) with predicted N-acetyltransferase activity	10.8795	20.16	1	4	4	4	248	29.0426	5.32568
Afu6g06580	Afu6g06580 AspGDID:ASPL0000109019 COORDS:Chr6_A_fumigatus_Af293:1433532-1432446C, translated using codon table 1 (269 amino acids) Uncharacterized ORF; Ortholog(s) have phosphomannomutase activity, role in ER to Golgi vesicle-mediated transport, establishment or maintenance of cell polarity, nuclear envelope organization, protein targeting to ER and cytosol, nucleus localization	8.55465	16.73	1	4	4	4	269	30.5733	5.66846
Afu2g14030	Afu2g14030 AspGDID:ASPL0000104118 COORDS:Chr2_A_fumigatus_Af293:3674689-3672338C, translated using codon table 1 (719 amino acids) Uncharacterized ORF; Ortholog(s) have arginine-tRNA ligase activity, role in arginyl-tRNA aminoacylation and cytosol, mitochondrion localization	8.22785	7.79	1	4	4	4	719	80.6727	8.00146
Afu6g12660	Afu6g12660 AspGDID:ASPL0000109609 COORDS:Chr6_A_fumigatus_Af293:3198955-3199723W, translated using codon table 1 (155 amino acids) Uncharacterized ORF; 40S ribosomal protein S10b; protein level decreases upon heat shock	13.7154	23.23	1	3	3	4	155	17.8492	9.72998
Afu3g13820	Afu3g13820 AspGDID:ASPL0000105775 COORDS:Chr3_A_fumigatus_Af293:3651038-3650223C, translated using codon table 1 (201 amino acids) Uncharacterized ORF; Putative HET-C2 protein; transcript induced by exposure to human airway epithelial cells	10.4015	16.92	1	3	3	3	201	22.1986	6.94678
Afu5g09210	alp2 AspGDID:ASPL0000107990 COORDS:Chr5_A_fumigatus_Af293:2366798-2365176C, translated using codon table 1 (495 amino acids) Verified ORF; Autophagic (vacuolar) serine protease; allergen Asp f 18; predicted signal sequence for secretion; transcript induced by growth on hydrogen peroxide; transcript up-regulated in conidia exposed to neutrophils	9.14957	9.29	1	3	3	3	495	52.6075	6.25244
Afu5g09400	Afu5g09400 AspGDID:ASPL0000108009 COORDS:Chr5_A_fumigatus_Af293:2418391-2419402W, translated using codon table 1 (294 amino acids) Uncharacterized ORF; Putative carbonyl reductase; transcript up-regulated in conidia exposed to neutrophils	8.42945	14.97	1	3	3	3	294	31.4496	6.30322
Afu1g13780	Afu1g13780 AspGDID:ASPL0000102446 COORDS:Chr1_A_fumigatus_Af293:3681048-3680611C, translated using codon table 1 (103 amino acids) Uncharacterized ORF; Has domain(s) with predicted DNA binding, protein heterodimerization activity, role in DNA-templated transcription, initiation, nucleosome assembly and nucleosome, nucleus localization	7.51928	29.13	1	3	3	3	103	11.3634	11.356
Afu1g14640	Afu1g14640 AspGDID:ASPL0000102531 COORDS:Chr1_A_fumigatus_Af293:3908846-3907986C, translated using codon table 1 (286 amino acids) Uncharacterized ORF; Ortholog of <i>A. nidulans FGSC A4</i> : AN0805, <i>A. niger CBS 513.88</i> : An01g12640, <i>A. oryzae RIB40</i> : AO090003000485, <i>Aspergillus wentii</i> : Aspwe1_0487250 and <i>Aspergillus sydowii</i> : Aspsy1_0025994	7.05894	10.84	1	3	3	3	286	32.354	9.93506
Afu1g09970	Afu1g09970 AspGDID:ASPL0000102063 COORDS:Chr1_A_fumigatus_Af293:2578608-2579924W, translated using codon table 1 (365 amino acids) Uncharacterized ORF; Ortholog(s) have role in ascospore formation, cellular response to cadmium ion, detoxification of cadmium ion	6.89522	12.88	1	3	3	3	365	40.9887	6.3667
Afu7g00170	nscD AspGDID:ASPL0000109816 COORDS:Chr7_A_fumigatus_Af293:42071-43432W, translated using codon table 1 (453 amino acids) Verified ORF; Dimethylallyl tryptophan synthase; polycyclic prenyltransferase; encoded within the nsc/fcc secondary metabolite gene cluster; role in neosartoricin and fumicycline A biosynthesis; induced by contact with Streptomyces rapamycinicus	6.32057	8.17	1	3	3	3	453	50.8789	7.13721
Afu5g02850	Afu5g02850 AspGDID:ASPL0000107464 COORDS:Chr5_A_fumigatus_Af293:754834-756051W, translated using codon table 1 (324 amino acids) Uncharacterized ORF; Has domain(s) with predicted arylformamidase activity and role in tryptophan catabolic process to kynurenine	5.29753	12.04	1	3	3	3	324	36.303	5.21143
Afu7g05470	Afu7g05470 AspGDID:ASPL0000110240 COORDS:Chr7_A_fumigatus_Af293:1320985-1322187W, translated using codon table 1 (352 amino acids) Uncharacterized ORF; Putative electron transfer flavoprotein alpha subunit; transcript induced by exposure to human airway epithelial cells; induced by exposure to artemisinin	4.95271	10.23	1	3	3	3	352	36.6673	6.27783
Afu2g03040	Afu2g03040 AspGDID:ASPL0000103133 COORDS:Chr2_A_fumigatus_Af293:787407-788437W, translated using codon table 1 (192 amino acids) Uncharacterized ORF; Ribosomal protein L34	4.56405	14.06	1	3	3	3	192	21.4242	9.49561
Afu5g11290	Afu5g11290 AspGDID:ASPL0000108188 COORDS:Chr5_A_fumigatus_Af293:2892452-2891116C, translated using codon table 1 (364 amino acids) Uncharacterized ORF; Ortholog(s) have D-amino-acid oxidase activity and role in D-alanine metabolic process, D-valine metabolic process	4.03081	10.44	1	3	3	3	364	39.5491	7.91357
Afu1g06190	rmtA AspGDID:ASPL0000101787 COORDS:Chr1_A_fumigatus_Af293:1789312-1787900C, translated using codon table 1 (353 amino acids) Uncharacterized ORF; Histone H4 arginine methyltransferase	2.16709	16.15	1	3	3	3	353	40.258	5.2749
Afu6g13330	Afu6g13330 AspGDID:ASPL0000109674 COORDS:Chr6_A_fumigatus_Af293:3382648-3383137W, translated using codon table 1 (112 amino acids) Verified ORF; Putative RNA binding protein of unknown function; conidia-enriched protein; transcript up-regulated in conidia exposed to neutrophils	11.391	37.5	1	2	2	2	112	12.4831	6.15088
Afu5g07300	Afu5g07300 AspGDID:ASPL0000107804 COORDS:Chr5_A_fumigatus_Af293:1814759-1815768W, translated using codon table 1 (260 amino acids) Uncharacterized ORF; Electron transfer flavoprotein, beta subunit	8.16591	12.69	1	2	2	2	260	28.2232	8.96826
Afu6g04970	Afu6g04970 AspGDID:ASPL0000108951 COORDS:Chr6_A_fumigatus_Af293:1181194-1182540W, translated using codon table 1 (428 amino acids) Uncharacterized ORF; Ortholog(s) have O-phospho-L-serine:2-oxoglutarate aminotransferase activity, role in L-serine biosynthetic process, purine nucleobase biosynthetic process and cytosol localization	7.71575	8.64	1	2	2	2	428	46.8644	6.81494
Afu4g07650	cyp6 AspGDID:ASPL0000106480 COORDS:Chr4_A_fumigatus_Af293:1987776-1988776W, translated using codon table 1 (209 amino acids) Uncharacterized ORF; Putative peptidyl-prolyl cis-trans isomerase	7.47214	14.35	1	2	2	2	209	22.9459	8.27979
Afu6g13140	Afu6g13140 AspGDID:ASPL0000109656 COORDS:Chr6_A_fumigatus_Af293:3322359-3321489C, translated using codon table 1 (232 amino acids) Uncharacterized ORF; Ortholog(s) have 3,4-dihydroxy-2-butanone-4-phosphate synthase activity, role in aerobic respiration, riboflavin biosynthetic process and cytosol, mitochondrial intermembrane space, nucleus localization	7.32853	12.5	1	2	2	2	232	25.2938	5.03369
Afu4g07190	argB AspGDID:ASPL0000106433 COORDS:Chr4_A_fumigatus_Af293:1868021-1866906C, translated using codon table 1 (371 amino acids) Verified ORF; Ornathine carbamoyltransferase, enzyme of the arginine biosynthesis pathway; hypoxia induced protein	7.05947	8.89	1	2	2	2	371	40.0877	7.89893
Afu8g04340	Afu8g04340 AspGDID:ASPL0000110769 COORDS:Chr8_A_fumigatus_Af293:975505-974078C, translated using codon table 1 (412 amino acids) Uncharacterized ORF; Putative cystathionine gamma-lyase; transcript induced by exposure to human airway epithelial cells	6.83043	7.77	1	2	2	2	412	43.628	6.80029
Afu3g11640	Afu3g11640 AspGDID:ASPL0000105562 COORDS:Chr3_A_fumigatus_Af293:3058607-3059789W, translated using codon table 1 (368 amino acids) Uncharacterized ORF; Homoserine dehydrogenase; no human homolog	6.72593	8.42	1	2	2	2	368	38.4803	5.87158
Afu5g11560	Afu5g11560 AspGDID:ASPL0000108213 COORDS:Chr5_A_fumigatus_Af293:2965961-2964433C, translated using codon table 1 (439 amino acids) Uncharacterized ORF; Ortholog(s) have ATP binding activity	6.68392	10.93	1	2	2	2	439	47.6211	6.55127
Afu1g10820	Afu1g10820 AspGDID:ASPL0000102145 COORDS:Chr1_A_fumigatus_Af293:2823301-2822605C, translated using codon table 1 (211 amino acids) Uncharacterized ORF; Ortholog(s) have adenylylsulfate kinase activity	6.65715	16.11	1	2	2	2	211	23.5834	6.96143
Afu6g07760	Afu6g07760 AspGDID:ASPL0000109136 COORDS:Chr6_A_fumigatus_Af293:1770437-1772048W, translated using codon table 1 (492 amino acids) Uncharacterized ORF; Ortholog(s) have structural molecule activity	6.42542	6.3	1	2	2	2	492	54.4651	6.49365
Afu2g08130	Afu2g08130 AspGDID:ASPL0000103533 COORDS:Chr2_A_fumigatus_Af293:2111022-2110081C, translated using codon table 1 (106 amino acids) Uncharacterized ORF; 60S ribosomal protein L44	6.24259	16.04	1	2	2	2	106	12.1367	10.4478
Afu2g04760	Afu2g04760 AspGDID:ASPL0000103301 COORDS:Chr2_A_fumigatus_Af293:1306847-1301824C, translated using codon table 1 (1655 amino acids) Uncharacterized ORF; Ortholog(s) have Cul3-RING ubiquitin ligase complex localization	6.22294	1.99	1	2	2	2	1655	181.283	8.80713
Afu4g06900	Afu4g06900 AspGDID:ASPL0000106404 COORDS:Chr4_A_fumigatus_Af293:1787004-1789272W, translated using codon table 1 (573 amino acids) Uncharacterized ORF; Ortholog(s) have asparagine synthase (glutamine-hydrolyzing) activity, role in asparagine biosynthetic process and cytosol, nucleus localization	5.8066	6.98	1	2	2	2	573	64.6714	6.29053
Afu5g03690	Afu5g03690 AspGDID:ASPL0000107547 COORDS:Chr5_A_fumigatus_Af293:987794-986454C, translated using codon table 1 (424 amino acids) Uncharacterized ORF; Ortholog(s) have phosphatidylinositol transporter activity	5.72131	7.08	1	2	2	2	424	46.141	4.84326
Afu1g06210	agm1 AspGDID:ASPL0000101789 COORDS:Chr1_A_fumigatus_Af293:1791710-1793700W, translated using codon table 1 (566 amino acids) Verified ORF; N-acetylphosphoglucosamine mutase, involved in chitin biosynthesis; essential	5.58841	5.12	1	2	2	2	566	61.4774	6.11279
Afu2g04010	tpsB AspGDID:ASPL0000103227 COORDS:Chr2_A_fumigatus_Af293:1094679-1092973C, translated using codon table 1 (479 amino acids) Verified ORF; Putative trehalose-6-phosphate synthase; role in trehalose biosynthesis; expression up during heat shock; hypervirulent in combination with tpsA mutation, in a mouse model of pulmonary infection; predicted gene pair with AFUA_6G12950	5.39699	5.22	2	2	2	2	479	53.7666	7.43018
Afu1g05130	Afu1g05130 AspGDID:ASPL0000101682 COORDS:Chr1_A_fumigatus_Af293:1468615-1464920C, translated using codon table 1 (1170 amino acids) Uncharacterized ORF; Has domain(s) with predicted phospholipid binding activity	5.23237	1.88	1	2	2	2	1170	129.377	8.85107
Afu5g02210	Afu5g02210 AspGDID:ASPL0000107401 COORDS:Chr5_A_fumigatus_Af293:565378-563628C, translated using codon table 1 (559 amino acids) Uncharacterized ORF; Ortholog of <i>A. nidulans FGSC A4</i> : AN8034, <i>A. niger CBS 513.88</i> : An02g10730, <i>A. oryzae RIB40</i> : AO090102000294, <i>Aspergillus wentii</i> : Aspwe1_0114775 and <i>Aspergillus sydowii</i> : Aspsy1_0033693	4.90519	3.4	1	2	2	2	559	60.7054	9.48096
Afu5g01860	Afu5g01860 AspGDID:ASPL0000107366 COORDS:Chr5_A_fumigatus_Af293:473984-473076C, translated using codon table 1 (188 amino acids) Uncharacterized ORF; Ortholog(s) have role in Arp2/3 complex-mediated actin nucleation, actin cortical patch localization, cellular response to drug, endocytosis and establishment of mitochondrion localization, <a href="#GOsection">more</a>	4.68531	18.62	1	2	2	2	188	21.1359	6.80029
Afu3g14660	Afu3g14660 AspGDID:ASPL0000105855 COORDS:Chr3_A_fumigatus_Af293:3885807-3885533C, translated using codon table 1 (85 amino acids) Uncharacterized ORF; Ortholog of <i>A. nidulans FGSC A4</i> : AN2535, <i>A. niger CBS 513.88</i> : An09g01230, <i>Aspergillus wentii</i> : Aspwe1_0107397, Aspwe1_0171355 and <i>Aspergillus sydowii</i> : Aspsy1_0087029	4.40435	38.82	1	2	2	2	85	9.02357	5.14795
Afu5g08290	Afu5g08290 AspGDID:ASPL0000107901 COORDS:Chr5_A_fumigatus_Af293:2105292-2104352C, translated using codon table 1 (283 amino acids) Uncharacterized ORF; Ortholog(s) have intracellular localization	4.30286	6.36	1	2	2	2	283	31.3553	6.69775
Afu5g10650	Afu5g10650 AspGDID:ASPL0000108129 COORDS:Chr5_A_fumigatus_Af293:2725117-2723747C, translated using codon table 1 (412 amino acids) Uncharacterized ORF; Has domain(s) with predicted FMN binding, oxidoreductase activity, oxidoreductase activity, acting on the CH-NH2 group of donors, pyridoxamine-phosphate oxidase activity	4.07085	7.04	1	2	2	2	412	45.9339	6.25244
Afu5g06710	Afu5g06710 AspGDID:ASPL0000107747 COORDS:Chr5_A_fumigatus_Af293:1646867-1648603W, translated using codon table 1 (475 amino acids) Uncharacterized ORF; Ortholog(s) have cytosol, nucleus localization	4.04465	7.37	1	2	2	2	475	53.6043	5.24951
Afu2g06230	Afu2g06230 AspGDID:ASPL0000103446 COORDS:Chr2_A_fumigatus_Af293:1796803-1795031C, translated using codon table 1 (550 amino acids) Uncharacterized ORF; Ortholog(s) have imidazoleglycerol-phosphate synthase activity, role in histidine biosynthetic process and cytosol, nucleus localization	3.94731	4.36	1	2	2	2	550	60.1522	5.75732
Afu8g01670	cat2 AspGDID:ASPL0000110606 COORDS:Chr8_A_fumigatus_Af293:441545-439266C, translated using codon table 1 (759 amino acids) Verified ORF; Putative bifunctional catalase-peroxidase; induction in response to hydrogen peroxide Yap1-dependent; transcript induced by exposure to human airway epithelial cells; SrbA-regulated during hypoxia	3.71493	2.37	1	2	2	2	759	83.7098	6.58057
Afu3g10700	Afu3g10700 AspGDID:ASPL0000105468 COORDS:Chr3_A_fumigatus_Af293:2775082-2775739W, translated using codon table 1 (193 amino acids) Uncharacterized ORF; Ortholog(s) have mRNA binding, structural molecule activity and role in Arp2/3 complex-mediated actin nucleation, actin cortical patch assembly, cellular response to drug, mitochondrion inheritance	2.70205	13.47	1	2	2	2	193	20.5543	5.60498
Afu8g02840	Afu8g02840 AspGDID:ASPL0000110720 COORDS:Chr8_A_fumigatus_Af293:771371-768813C, translated using codon table 1 (800 amino acids) Uncharacterized ORF; Putative mitochondrial dynamin GTPase with a predicted role in mitochondrial fission	2.37511	2.5	1	2	2	2	800	89.1729	6.65381
Afu8g03920	Afu8g03920 AspGDID:ASPL0000361923 COORDS:Chr8_A_fumigatus_Af293:837589-837167C, translated using codon table 1 (103 amino acids) Uncharacterized ORF; Ortholog(s) have histone binding, protein complex binding, protein homodimerization activity, protein kinase activator activity, ubiquitin binding activity	2.33068	15.53	1	2	2	2	103	12.5234	6.0874
Afu5g03520	Afu5g03520 AspGDID:ASPL0000107530 COORDS:Chr5_A_fumigatus_Af293:949870-951084W, translated using codon table 1 (323 amino acids) Verified ORF; Immunoreactive secreted protein	1.90882	6.19	1	2	2	2	323	35.4962	6.46826
Afu5g09860	Afu5g09860 AspGDID:ASPL0000108054 COORDS:Chr5_A_fumigatus_Af293:2552613-2551525C, translated using codon table 1 (287 amino acids) Uncharacterized ORF; Putative esterase	1.68102	7.67	1	2	2	2	287	31.5205	6.72705
Afu5g07890	Afu5g07890 AspGDID:ASPL0000107861 COORDS:Chr5_A_fumigatus_Af293:1979250-1978604C, translated using codon table 1 (149 amino acids) Uncharacterized ORF; Putative single-stranded DNA binding protein family member	1.64915	15.44	1	2	2	2	149	16.2432	9.68604
Afu2g09180	Afu2g09180 AspGDID:ASPL0000103636 COORDS:Chr2_A_fumigatus_Af293:2354314-2353640C, translated using codon table 1 (201 amino acids) Uncharacterized ORF; Ortholog(s) have role in retrograde vesicle-mediated transport, Golgi to ER and COPI vesicle coat, cytosol, nucleus localization	0	8.46	1	2	2	2	201	21.9153	4.80518
