# Supplementary material for: Aspergillus fumigatus High Osmolarity Glycerol Mitogen Activated Protein Kinases SakA and MpkC Physically Interact During Osmotic and Cell Wall Stresses
Source: Front Microbiol. 2019 May 7;10:918. doi: 10.3389/fmicb.2019.00918 (PMC6514138; doi:10.3389/fmicb.2019.00918)
Supplement: Supplementary file 6 [file Table_6.XLSX]

## Sheet: SakA GFP CR_5min
Supplementary Table S6 - Total proteins identified in the SakA::GFP strain in presence of Congo Red 300µg/mL (5, 15, 30 and 60 min)
Accession	Accession	Description	Score	Coverage	# Proteins	# Unique Peptides	# Peptides	# PSMs	# AAs	MW [kDa]	calc. pI
Afu1g12940	Afu1g12940	sakA AspGDID:ASPL0000102362 COORDS:Chr1_A_fumigatus_Af293:3428181-3429807W, translated using codon table 1 (366 amino acids) Verified ORF; Putative mitogen-activated protein kinase (MAPK) with predicted roles in the osmotic and oxidative stress responses; involved in sensing nitrogen in the medium	365.59	77.32	1	21	21	105	366	41.9334	5.60498
Afu2g12910	Afu3g06550	Afu3g06550 AspGDID:ASPL0000105066 COORDS:Chr3_A_fumigatus_Af293:1623469-1625008W, translated using codon table 1 (469 amino acids) Uncharacterized ORF; Has domain(s) with predicted phosphatase activity, phosphoserine phosphatase activity and role in L-serine biosynthetic process, metabolic process	196.149	78.46	1	21	21	38	469	51.8419	5.89697
Afu5g08270	Afu7g02260	Afu7g02260 AspGDID:ASPL0000110021 COORDS:Chr7_A_fumigatus_Af293:610666-608054C, translated using codon table 1 (784 amino acids) Uncharacterized ORF; Ortholog of <i>A. nidulans FGSC A4</i> : AN9087/oefA, <i>A. niger CBS 513.88</i> : An12g00390, <i>A. oryzae RIB40</i> : AO090038000604, <i>Aspergillus wentii</i> : Aspwe1_0113275 and <i>Aspergillus sydowii</i> : Aspsy1_0061396	62.8673	21.81	1	10	10	14	784	84.5043	8.67529
	Afu2g12910	Afu2g12910 AspGDID:ASPL0000104004 COORDS:Chr2_A_fumigatus_Af293:3311664-3309244C, translated using codon table 1 (741 amino acids) Uncharacterized ORF; Ortholog of <i>A. nidulans FGSC A4</i> : AN6264, <i>A. niger CBS 513.88</i> : An02g01620, <i>A. oryzae RIB40</i> : AO090026000343, <i>Aspergillus wentii</i> : Aspwe1_0117790 and <i>Aspergillus sydowii</i> : Aspsy1_0151049	46.2273	14.44	1	7	7	11	741	80.0612	10.0229
	Afu2g03490	Afu2g03490 AspGDID:ASPL0000103178 COORDS:Chr2_A_fumigatus_Af293:921519-923827W, translated using codon table 1 (645 amino acids) Uncharacterized ORF; Putative calcium/calmodulin-dependent protein kinase; calcium induced; transcript induced by exposure to human airway epithelial cells	43.9808	17.83	1	8	8	11	645	72.0815	6.87354
	Afu6g02540	Afu6g02540 AspGDID:ASPL0000108708 COORDS:Chr6_A_fumigatus_Af293:481139-483203W, translated using codon table 1 (643 amino acids) Uncharacterized ORF; Has domain(s) with predicted actin binding activity	41.5941	22.4	1	10	10	11	643	65.9529	9.5249
	Afu3g13870	nsdD AspGDID:ASPL0000105780 COORDS:Chr3_A_fumigatus_Af293:3674484-3676292W, translated using codon table 1 (493 amino acids) Verified ORF; Putative GATA-type transcriptional activator; required during an early stage of mating; plays a role in resistance toward cell wall stress	39.6316	28.19	1	9	9	10	493	52.9912	9.26123
	Afu3g08540	Afu3g08540 AspGDID:ASPL0000105256 COORDS:Chr3_A_fumigatus_Af293:2192405-2191310C, translated using codon table 1 (323 amino acids) Uncharacterized ORF; Ortholog(s) have calcium ion binding, zinc ion binding activity and role in asexual sporulation, axial cellular bud site selection, bipolar cellular bud site selection, regulation of COPII vesicle coating	39.5491	34.98	1	6	6	8	323	36.0919	7.34229
	Afu2g09730	Afu2g09730 AspGDID:ASPL0000103689 COORDS:Chr2_A_fumigatus_Af293:2494100-2495262W, translated using codon table 1 (321 amino acids) Uncharacterized ORF; Has domain(s) with predicted nucleic acid binding, nucleotide binding activity	23.0568	23.99	1	5	5	6	321	34.7668	10.6382
	Afu2g04680	pakA AspGDID:ASPL0000103294 COORDS:Chr2_A_fumigatus_Af293:1275738-1273126C, translated using codon table 1 (815 amino acids) Uncharacterized ORF; Protein serine/threonine kinase; similar to Ste20, a sexual development regulator	22.8338	15.95	1	6	6	6	815	89.6158	9.43701
	Afu2g12900	Afu2g12900 AspGDID:ASPL0000104003 COORDS:Chr2_A_fumigatus_Af293:3308048-3307099C, translated using codon table 1 (271 amino acids) Uncharacterized ORF; Ortholog(s) have urease activity, role in urea catabolic process and cytosol, nucleus localization	21.8888	31.73	1	7	7	7	271	29.1578	6.22705
	Afu6g08360	Afu6g08360 AspGDID:ASPL0000109193 COORDS:Chr6_A_fumigatus_Af293:1958167-1959214W, translated using codon table 1 (332 amino acids) Uncharacterized ORF; Thiazole biosynthesis enzyme; hypoxia induced protein; induced by gliotoxin exposure	20.5525	24.1	1	4	4	4	332	35.469	5.84619
	Afu2g14670	Afu2g14670 AspGDID:ASPL0000104181 COORDS:Chr2_A_fumigatus_Af293:3849283-3851093W, translated using codon table 1 (585 amino acids) Uncharacterized ORF; Ortholog(s) have role in ascospore formation, cellular response to caffeine, eukaryotic translation initiation factor 3 complex assembly, gamma-tubulin complex localization	19.6441	15.38	1	5	5	5	585	65.1913	5.26221
	Afu6g03460	Afu6g03460 AspGDID:ASPL0000108801 COORDS:Chr6_A_fumigatus_Af293:741171-742895W, translated using codon table 1 (574 amino acids) Uncharacterized ORF; Has domain(s) with predicted ATP binding activity	19.5458	15.16	1	5	5	5	574	63.4223	6.13818
	Afu4g04120	Afu4g04120 AspGDID:ASPL0000106230 COORDS:Chr4_A_fumigatus_Af293:1160684-1163043W, translated using codon table 1 (598 amino acids) Uncharacterized ORF; Ortholog(s) have guanyl-nucleotide exchange factor adaptor activity	19.3046	12.54	1	6	6	7	598	66.2801	7.56201
	Afu1g05560	Afu1g05560 AspGDID:ASPL0000101724 COORDS:Chr1_A_fumigatus_Af293:1596516-1594882C, translated using codon table 1 (389 amino acids) Uncharacterized ORF; Ortholog(s) have role in cytoplasmic translation, filamentous growth and cytosol, nucleus, polysomal ribosome, polysome localization	18.796	15.42	1	4	4	5	389	42.7828	8.74854
	Afu3g08650	Afu3g08650 AspGDID:ASPL0000105267 COORDS:Chr3_A_fumigatus_Af293:2214642-2217724W, translated using codon table 1 (939 amino acids) Uncharacterized ORF; Putative C1-tetrahydrofolate synthase; transcript up-regulated in conidia exposed to neutrophils	17.1277	8.63	1	6	6	6	939	100.46	7.44482
	Afu1g00460	Afu1g00460 AspGDID:ASPL0000101218 COORDS:Chr1_A_fumigatus_Af293:146969-145247C, translated using codon table 1 (507 amino acids) Uncharacterized ORF; Ortholog(s) have intracellular localization	16.1507	13.41	1	5	5	5	507	55.8111	6.15088
	Afu5g02210	Afu5g02210 AspGDID:ASPL0000107401 COORDS:Chr5_A_fumigatus_Af293:565378-563628C, translated using codon table 1 (559 amino acids) Uncharacterized ORF; Ortholog of <i>A. nidulans FGSC A4</i> : AN8034, <i>A. niger CBS 513.88</i> : An02g10730, <i>A. oryzae RIB40</i> : AO090102000294, <i>Aspergillus wentii</i> : Aspwe1_0114775 and <i>Aspergillus sydowii</i> : Aspsy1_0033693	13.6445	10.55	1	4	4	4	559	60.7054	9.48096
	Afu7g02310	Afu7g02310 AspGDID:ASPL0000110026 COORDS:Chr7_A_fumigatus_Af293:629238-628529C, translated using codon table 1 (217 amino acids) Uncharacterized ORF; Putative adenine phosphoribosyltransferase 1; transcript induced by exposure to human airway epithelial cells; induced by gliotoxin exposure	12.5598	27.19	1	4	4	4	217	23.6063	6.39209
	Afu5g05500	Afu5g05500 AspGDID:ASPL0000107629 COORDS:Chr5_A_fumigatus_Af293:1277444-1278887W, translated using codon table 1 (424 amino acids) Uncharacterized ORF; Ortholog(s) have phosphoglycerate dehydrogenase activity, role in serine family amino acid biosynthetic process and cytosol localization	11.9665	12.03	1	4	4	4	424	45.8868	7.00537
	Afu2g02210	Afu2g02210 AspGDID:ASPL0000103051 COORDS:Chr2_A_fumigatus_Af293:557698-558664W, translated using codon table 1 (303 amino acids) Uncharacterized ORF; Ortholog of <i>A. nidulans FGSC A4</i> : AN4600, <i>A. niger CBS 513.88</i> : An07g06630, <i>Aspergillus wentii</i> : Aspwe1_0104597, <i>Aspergillus sydowii</i> : Aspsy1_0180963 and <i>Aspergillus terreus NIH2624</i> : ATET_05692	11.0504	17.49	1	3	3	3	303	32.916	9.51025
	Afu5g04410	Afu5g04410 AspGDID:ASPL0000107620 COORDS:Chr5_A_fumigatus_Af293:1197423-1195796C, translated using codon table 1 (521 amino acids) Uncharacterized ORF; Ortholog of <i>A. nidulans FGSC A4</i> : AN11225, <i>Neosartorya fischeri NRRL 181</i> : NFIA_037650, <i>Aspergillus wentii</i> : Aspwe1_0043173 and <i>Aspergillus versicolor</i> : Aspve1_0389199	10.9744	8.45	1	3	3	3	521	58.9417	11.0923
	Afu1g05490	Afu1g05490 AspGDID:ASPL0000101717 COORDS:Chr1_A_fumigatus_Af293:1568506-1572348W, translated using codon table 1 (1256 amino acids) Uncharacterized ORF; Ortholog of <i>A. nidulans FGSC A4</i> : AN4072, <i>A. niger CBS 513.88</i> : An18g04300, <i>A. oryzae RIB40</i> : AO090009000396, <i>Aspergillus wentii</i> : Aspwe1_0169302 and <i>Aspergillus sydowii</i> : Aspsy1_0057624	10.6239	4.78	1	4	4	4	1256	139.306	9.31982
	Afu4g12350	Afu4g12350 AspGDID:ASPL0000106942 COORDS:Chr4_A_fumigatus_Af293:3234178-3232553C, translated using codon table 1 (499 amino acids) Verified ORF; Ortholog of <i>A. nidulans FGSC A4</i> : AN3664, <i>A. niger CBS 513.88</i> : An01g07660, <i>A. oryzae RIB40</i> : AO090009000437, <i>Aspergillus wentii</i> : Aspwe1_0047309 and <i>Aspergillus sydowii</i> : Aspsy1_1056088	9.98108	6.21	1	3	3	3	499	61.0517	9.11475
	Afu6g14170	Afu6g14170 AspGDID:ASPL0000109756 COORDS:Chr6_A_fumigatus_Af293:3608964-3606174C, translated using codon table 1 (877 amino acids) Uncharacterized ORF; Has domain(s) with predicted cation transmembrane transporter activity, role in cation transport, transmembrane transport and integral component of membrane localization	9.51887	4.45	1	3	3	3	877	94.5128	7.53271
	Afu2g03580	Afu2g03580 AspGDID:ASPL0000103185 COORDS:Chr2_A_fumigatus_Af293:953968-955580W, translated using codon table 1 (518 amino acids) Uncharacterized ORF; Ortholog(s) have phenylalanine-tRNA ligase activity, role in phenylalanyl-tRNA aminoacylation and cytosol, phenylalanine-tRNA ligase complex localization	9.27485	9.07	1	4	4	4	518	58.509	7.44482
	Afu1g15460	Afu1g15460 AspGDID:ASPL0000102611 COORDS:Chr1_A_fumigatus_Af293:4176314-4173471C, translated using codon table 1 (866 amino acids) Uncharacterized ORF; Ortholog of <i>A. nidulans FGSC A4</i> : AN0892, <i>A. niger CBS 513.88</i> : An01g13900, <i>A. oryzae RIB40</i> : AO090005001665, <i>Aspergillus wentii</i> : Aspwe1_0027562 and <i>Aspergillus sydowii</i> : Aspsy1_0138433	8.34201	4.85	1	3	3	3	866	95.2598	9.61279
	Afu3g07790	Afu3g07790 AspGDID:ASPL0000105183 COORDS:Chr3_A_fumigatus_Af293:1963894-1965412W, translated using codon table 1 (464 amino acids) Uncharacterized ORF; Argininosuccinate lyase; hypoxia induced protein	8.32098	7.11	1	3	3	3	464	51.8196	6.27783
	Afu6g04010	Afu6g04010 AspGDID:ASPL0000108856 COORDS:Chr6_A_fumigatus_Af293:901498-904822W, translated using codon table 1 (962 amino acids) Uncharacterized ORF; Ortholog(s) have importin-alpha export receptor activity, role in cell division, protein export from nucleus and nuclear membrane localization	7.92587	3.53	1	2	2	2	962	108.421	5.37646
	Afu4g04550	Afu4g04550 AspGDID:ASPL0000106273 COORDS:Chr4_A_fumigatus_Af293:1282186-1283190W, translated using codon table 1 (204 amino acids) Uncharacterized ORF; Putative phosphoribosyltransferase; protein induced by hydrogen peroxide	7.89783	17.16	1	2	2	2	204	23.1709	5.32568
	Afu5g08190	Afu5g08190 AspGDID:ASPL0000107891 COORDS:Chr5_A_fumigatus_Af293:2074402-2073089C, translated using codon table 1 (437 amino acids) Uncharacterized ORF; Ortholog of <i>A. nidulans FGSC A4</i> : AN7717, <i>A. oryzae RIB40</i> : AO090701000736, <i>Aspergillus wentii</i> : Aspwe1_0101496, <i>Aspergillus sydowii</i> : Aspsy1_0046260 and <i>Aspergillus terreus NIH2624</i> : ATET_08307	7.84121	9.15	1	3	3	3	437	48.0122	5.49072
	Afu7g02170	cyp8 AspGDID:ASPL0000110012 COORDS:Chr7_A_fumigatus_Af293:582276-583887W, translated using codon table 1 (459 amino acids) Uncharacterized ORF; Putative peptidyl-prolyl cis-trans isomerase with a central RNA recognition motif (RRM)	7.64374	6.75	1	2	2	2	459	52.8668	7.15186
	Afu2g11840	cyc8 AspGDID:ASPL0000103898 COORDS:Chr2_A_fumigatus_Af293:3056794-3059852W, translated using codon table 1 (867 amino acids) Verified ORF; Transcriptional corepressor; ortholog of <i>A. nidulans</i> ssnF; calcium induced; mutation causes increased azole sensitivity	7.58259	3.81	1	3	3	3	867	94.5764	6.72705
	Afu4g09750	Afu4g09750 AspGDID:ASPL0000106689 COORDS:Chr4_A_fumigatus_Af293:2539039-2539733W, translated using codon table 1 (187 amino acids) Uncharacterized ORF; Ortholog(s) have role in aerobic respiration and mitochondrial nucleoid, mitochondrial ribosome localization	7.31498	18.72	1	2	2	2	187	19.7125	8.73389
	Afu2g07520	Afu2g07520 AspGDID:ASPL0000363027 COORDS:Chr2_A_fumigatus_Af293:1926201-1928684W, translated using codon table 1 (614 amino acids) Uncharacterized ORF; Ortholog(s) have aminopeptidase activity, epoxide hydrolase activity, role in cellular lipid metabolic process, protein catabolic process and cytosol, extracellular region, nucleus localization	7.02037	7.33	1	3	3	3	614	69.6784	6.21436
	Afu1g02670	Afu1g02670 AspGDID:ASPL0000101437 COORDS:Chr1_A_fumigatus_Af293:776882-775673C, translated using codon table 1 (320 amino acids) Uncharacterized ORF; ARP2/3 complex 34 kDa subunit; hypoxia induced protein	6.13103	7.19	1	2	2	2	320	36.915	6.87354
	Afu1g02410	Afu1g02410 AspGDID:ASPL0000101411 COORDS:Chr1_A_fumigatus_Af293:702057-703574W, translated using codon table 1 (469 amino acids) Uncharacterized ORF; Ortholog(s) have ATP-dependent 3'-5' DNA helicase activity, ATP-dependent 5'-3' DNA helicase activity and role in box C/D snoRNP assembly, histone exchange, rRNA processing, regulation of transcription from RNA polymerase II promoter	5.76271	5.33	1	2	2	2	469	51.3145	5.8335
	Afu5g12260	tigA AspGDID:ASPL0000108282 COORDS:Chr5_A_fumigatus_Af293:3183118-3184297W, translated using codon table 1 (368 amino acids) Uncharacterized ORF; Putative disulfide isomerase	5.74172	9.78	1	2	2	2	368	40.2289	6.44287
	Afu2g04010	tpsB AspGDID:ASPL0000103227 COORDS:Chr2_A_fumigatus_Af293:1094679-1092973C, translated using codon table 1 (479 amino acids) Verified ORF; Putative trehalose-6-phosphate synthase; role in trehalose biosynthesis; expression up during heat shock; hypervirulent in combination with tpsA mutation, in a mouse model of pulmonary infection; predicted gene pair with AFUA_6G12950	5.71954	5.22	2	2	2	2	479	53.7666	7.43018
	Afu1g14640	Afu1g14640 AspGDID:ASPL0000102531 COORDS:Chr1_A_fumigatus_Af293:3908846-3907986C, translated using codon table 1 (286 amino acids) Uncharacterized ORF; Ortholog of <i>A. nidulans FGSC A4</i> : AN0805, <i>A. niger CBS 513.88</i> : An01g12640, <i>A. oryzae RIB40</i> : AO090003000485, <i>Aspergillus wentii</i> : Aspwe1_0487250 and <i>Aspergillus sydowii</i> : Aspsy1_0025994	5.53526	5.94	1	2	2	2	286	32.354	9.93506
	Afu4g10540	Afu4g10540 AspGDID:ASPL0000106768 COORDS:Chr4_A_fumigatus_Af293:2759234-2756613C, translated using codon table 1 (832 amino acids) Uncharacterized ORF; Ortholog(s) have TFIID-class transcription factor binding, chromatin binding, core promoter binding, lysine-acetylated histone binding activity	5.32656	2.16	1	2	2	2	832	91.6639	5.87158
	Afu1g15960	Afu1g15960 AspGDID:ASPL0000102659 COORDS:Chr1_A_fumigatus_Af293:4331468-4333260W, translated using codon table 1 (554 amino acids) Uncharacterized ORF; Ortholog(s) have flavin adenine dinucleotide binding, glutathione transferase activity, glutathione-disulfide reductase activity	4.98229	5.6	1	2	2	2	554	60.0714	8.70459
	Afu2g01040	Afu2g01040 AspGDID:ASPL0000102935 COORDS:Chr2_A_fumigatus_Af293:239825-238336C, translated using codon table 1 (379 amino acids) Uncharacterized ORF; Putative formaldehyde dehydrogenase; transcript up-regulated in conidia exposed to neutrophils	4.84171	10.03	1	3	3	3	379	40.0182	7.26904
	Afu6g02940	Afu6g02940 AspGDID:ASPL0000108750 COORDS:Chr6_A_fumigatus_Af293:609669-612491W, translated using codon table 1 (897 amino acids) Uncharacterized ORF; Ortholog of <i>A. nidulans FGSC A4</i> : AN8765, <i>A. niger CBS 513.88</i> : An12g07540, <i>A. oryzae RIB40</i> : AO090026000788, <i>Aspergillus wentii</i> : Aspwe1_0148382 and <i>Aspergillus sydowii</i> : Aspsy1_0060048	4.62751	3.23	1	2	2	2	897	97.9594	7.6499
	Afu6g02910	argEF AspGDID:ASPL0000108747 COORDS:Chr6_A_fumigatus_Af293:603327-600472C, translated using codon table 1 (906 amino acids) Verified ORF; Mitochondrial bifunctional enzyme with N-acetyl-gamma-glutamyl-phosphate reductase and acetylglutamate kinase activity, catalyzes the second and third step in arginine biosynthesis	4.48615	2.21	1	2	2	2	906	99.3845	8.14795
	Afu1g10560	Afu1g10560 AspGDID:ASPL0000102120 COORDS:Chr1_A_fumigatus_Af293:2748690-2746925C, translated using codon table 1 (550 amino acids) Uncharacterized ORF; Ortholog(s) have role in cell division, positive regulation of growth rate, rRNA processing, response to drug, ribosomal subunit export from nucleus and nucleolus localization	4.37318	5.64	1	3	3	3	550	60.7523	5.92236
	Afu6g09030	Afu6g09030 AspGDID:ASPL0000109258 COORDS:Chr6_A_fumigatus_Af293:2147557-2146355C, translated using codon table 1 (382 amino acids) Uncharacterized ORF; Ortholog of <i>A. nidulans FGSC A4</i> : AN1773, <i>A. niger CBS 513.88</i> : An11g06790, <i>A. oryzae RIB40</i> : AO090001000581, <i>Aspergillus wentii</i> : Aspwe1_0121600 and <i>Aspergillus sydowii</i> : Aspsy1_0038822	3.55929	7.59	1	2	2	2	382	41.3745	6.69775
	Afu3g11640	Afu3g11640 AspGDID:ASPL0000105562 COORDS:Chr3_A_fumigatus_Af293:3058607-3059789W, translated using codon table 1 (368 amino acids) Uncharacterized ORF; Homoserine dehydrogenase; no human homolog	2.36449	4.89	1	2	2	2	368	38.4803	5.87158
	Afu7g01840	Afu7g01840 AspGDID:ASPL0000109979 COORDS:Chr7_A_fumigatus_Af293:496331-491364C, translated using codon table 1 (1522 amino acids) Uncharacterized ORF; Ortholog(s) have Golgi apparatus, cell tip, cytoplasmic vesicle, endoplasmic reticulum, plasma membrane localization	2.08115	1.38	1	2	2	2	1522	168.412	6.21436
	Afu3g10740	Afu3g10740 AspGDID:ASPL0000105472 COORDS:Chr3_A_fumigatus_Af293:2782828-2781858C, translated using codon table 1 (262 amino acids) Uncharacterized ORF; Putative RAB GTPase with a predicted role in regulation of endocytosis; transcript downregulated in response to amphotericin B	1.96115	7.25	1	2	2	2	262	27.5867	4.84326
	Afu5g06340	Afu5g06340 AspGDID:ASPL0000107710 COORDS:Chr5_A_fumigatus_Af293:1527332-1525770C, translated using codon table 1 (436 amino acids) Uncharacterized ORF; Ortholog(s) have cell division site, cytosol, nucleus localization	1.86689	3.44	1	2	2	2	436	49.2957	8.83643
	Afu2g03040	Afu2g03040 AspGDID:ASPL0000103133 COORDS:Chr2_A_fumigatus_Af293:787407-788437W, translated using codon table 1 (192 amino acids) Uncharacterized ORF; Ribosomal protein L34	1.65582	9.9	1	2	2	2	192	21.4242	9.49561
Afu3g06550	Afu3g10240	Afu3g10240 AspGDID:ASPL0000105422 COORDS:Chr3_A_fumigatus_Af293:2649693-2642482C, translated using codon table 1 (2327 amino acids) Uncharacterized ORF; Ortholog(s) have cytosol, nucleus localization	336.901	40.95	1	70	70	84	2327	258.955	5.94775
Afu7g02260	Afu7g01460	Afu7g01460 AspGDID:ASPL0000109941 COORDS:Chr7_A_fumigatus_Af293:380737-379723C, translated using codon table 1 (259 amino acids) Uncharacterized ORF; Ribosomal protein S5	256.41	56.37	1	13	13	66	259	28.2875	10.5356
Afu6g02540	Afu2g08040	Afu2g08040 AspGDID:ASPL0000103524 COORDS:Chr2_A_fumigatus_Af293:2064984-2068747W, translated using codon table 1 (1148 amino acids) Uncharacterized ORF; C6 finger domain protein; transcript up-regulated in conidia exposed to neutrophils	185.066	31.18	1	29	29	45	1148	125.856	8.1626
Afu3g13870	Afu8g05570	Afu8g05570 AspGDID:ASPL0000110886 COORDS:Chr8_A_fumigatus_Af293:1302301-1307445W, translated using codon table 1 (1497 amino acids) Uncharacterized ORF; Ortholog(s) have DNA binding, sequence-specific DNA binding transcription factor activity, transcription coactivator activity, transcription corepressor activity	171.522	36.87	1	41	41	46	1497	169.361	6.99072
Afu2g03490	Afu5g03120	Afu5g03120 AspGDID:ASPL0000107491 COORDS:Chr5_A_fumigatus_Af293:846908-842554C, translated using codon table 1 (1418 amino acids) Uncharacterized ORF; Ortholog(s) have 5'-3' exoribonuclease activity, magnesium ion binding activity and cytoplasmic mRNA processing body, cytoplasmic stress granule, cytosol localization	164.44	37.02	1	39	39	47	1418	159.853	7.06396
Afu6g03460	Afu1g06390	tef1 AspGDID:ASPL0000101807 COORDS:Chr1_A_fumigatus_Af293:1831593-1833461W, translated using codon table 1 (494 amino acids) Verified ORF; Putative translation elongation factor EF-1 alpha subunit; protein abundant in conidia; protein induced by heat shock	156.46	51.62	1	17	17	36	494	53.8089	9.1001
Afu4g12350	Afu3g10450	Afu3g10450 AspGDID:ASPL0000105443 COORDS:Chr3_A_fumigatus_Af293:2706092-2708542W, translated using codon table 1 (816 amino acids) Uncharacterized ORF; Has domain(s) with predicted RNA binding activity and role in RNA processing	155.783	48.16	1	26	26	37	816	88.462	5.79541
Afu2g09730	Afu6g04600	Afu6g04600 AspGDID:ASPL0000108914 COORDS:Chr6_A_fumigatus_Af293:1069099-1067587C, translated using codon table 1 (477 amino acids) Uncharacterized ORF; Ortholog of <i>A. nidulans FGSC A4</i> : AN6560, <i>A. niger CBS 513.88</i> : An15g00728, <i>A. oryzae RIB40</i> : AO090701000086, <i>Aspergillus wentii</i> : Aspwe1_0324754 and <i>Aspergillus sydowii</i> : Aspsy1_0037161	152.023	50.94	1	19	19	31	477	50.7436	10.228
Afu3g08650	Afu6g11890	Afu6g11890 AspGDID:ASPL0000109535 COORDS:Chr6_A_fumigatus_Af293:2972392-2969433C, translated using codon table 1 (930 amino acids) Uncharacterized ORF; Putative dynamin GTPase	149.131	45.16	1	28	28	39	930	104.337	6.82959
Afu1g00460	Afu4g12750	Afu4g12750 AspGDID:ASPL0000106981 COORDS:Chr4_A_fumigatus_Af293:3344997-3342675C, translated using codon table 1 (750 amino acids) Uncharacterized ORF; Ortholog(s) have role in deadenylation-dependent decapping of nuclear-transcribed mRNA and cytosol, nucleus localization	146.201	46.4	1	28	28	38	750	84.8371	6.99072
Afu2g12900	Afu2g13530	Afu2g13530 AspGDID:ASPL0000104068 COORDS:Chr2_A_fumigatus_Af293:3518148-3521066W, translated using codon table 1 (839 amino acids) Verified ORF; Putative translation elongation factor EF-2 subunit; protein abundant in conidia; protein induced by heat shock	144.722	45.65	1	30	31	38	839	93.1394	6.96143
Afu2g14670	Afu3g07480	Afu3g07480 AspGDID:ASPL0000105155 COORDS:Chr3_A_fumigatus_Af293:1875540-1878141W, translated using codon table 1 (722 amino acids) Uncharacterized ORF; Ortholog(s) have nucleus localization	137.121	45.43	1	25	25	35	722	80.9236	9.81787
Afu5g05500	Afu1g07440	hsp70 AspGDID:ASPL0000101909 COORDS:Chr1_A_fumigatus_Af293:2102587-2104621W, translated using codon table 1 (638 amino acids) Verified ORF; Molecular chaperone; conidia-enriched protein	137.017	47.65	1	24	25	33	638	69.6176	5.17334
Afu6g08360	Afu5g12250	Afu5g12250 AspGDID:ASPL0000108281 COORDS:Chr5_A_fumigatus_Af293:3179873-3182548W, translated using codon table 1 (731 amino acids) Uncharacterized ORF; Ortholog(s) have role in cellular response to DNA damage stimulus, interspecies interaction between organisms and cytosol, nucleus, polysome localization	133.301	43.5	1	28	28	39	731	82.9925	6.22705
Afu3g08540	Afu4g03410	fhpA AspGDID:ASPL0000106160 COORDS:Chr4_A_fumigatus_Af293:972646-973887W, translated using codon table 1 (413 amino acids) Uncharacterized ORF; Putative flavohemoprotein; protein induced by heat shock and hypoxia	129.683	63.68	1	18	18	27	413	45.5801	6.13818
Afu2g01040	Afu3g13400	nop5 AspGDID:ASPL0000105735 COORDS:Chr3_A_fumigatus_Af293:3545829-3547784W, translated using codon table 1 (591 amino acids) Uncharacterized ORF; Putative nucleolar protein	127.521	46.53	1	22	22	30	591	64.5228	7.60596
Afu2g04680	Afu4g07660	ded1 AspGDID:ASPL0000106481 COORDS:Chr4_A_fumigatus_Af293:1990592-1992696W, translated using codon table 1 (674 amino acids) Uncharacterized ORF; ATP-dependent RNA helicase	121.563	54.3	1	25	26	33	674	72.0459	8.95361
Afu1g05560	Afu1g09630	Afu1g09630 AspGDID:ASPL0000102029 COORDS:Chr1_A_fumigatus_Af293:2492509-2488889C, translated using codon table 1 (1056 amino acids) Uncharacterized ORF; Ortholog of <i>A. nidulans FGSC A4</i> : AN1325, <i>A. niger CBS 513.88</i> : An08g01230, <i>A. oryzae RIB40</i> : AO090012000905, <i>Aspergillus wentii</i> : Aspwe1_0036403 and <i>Aspergillus sydowii</i> : Aspsy1_0053047	120.268	34.85	1	24	24	31	1056	114.406	9.53955
Afu1g13780	Afu4g11830	Afu4g11830 AspGDID:ASPL0000106891 COORDS:Chr4_A_fumigatus_Af293:3122796-3124999W, translated using codon table 1 (713 amino acids) Uncharacterized ORF; Ortholog(s) have U2-type spliceosomal complex localization	114.928	42.64	1	21	21	27	713	83.3627	7.12256
Afu1g15960	Afu2g05250	rfeD AspGDID:ASPL0000103349 COORDS:Chr2_A_fumigatus_Af293:1460163-1458288C, translated using codon table 1 (508 amino acids) Uncharacterized ORF; Putative transcription factor; transcript up-regulated in conidia exposed to neutrophils	112.459	59.84	1	21	21	25	508	55.8867	9.23193
Afu7g02310	Afu5g04170	hsp90 AspGDID:ASPL0000107596 COORDS:Chr5_A_fumigatus_Af293:1108402-1110583W, translated using codon table 1 (706 amino acids) Verified ORF; Heat shock protein; allergen Asp f 12; likely essential; required for conidiation and cell wall integrity; transcript induced by growth on hydrogen peroxide; enters the nucleus in response to heat shock	110.544	35.55	1	25	25	30	706	80.5903	5.0083
Afu6g13330	Afu5g05710	Afu5g05710 AspGDID:ASPL0000107648 COORDS:Chr5_A_fumigatus_Af293:1330422-1332169W, translated using codon table 1 (487 amino acids) Uncharacterized ORF; Ortholog(s) have pseudouridine synthase activity	104.458	49.28	1	19	19	24	487	54.6913	8.5874
Afu5g04410	Afu3g04220	Afu3g04220 AspGDID:ASPL0000104938 COORDS:Chr3_A_fumigatus_Af293:1190959-1197288W, translated using codon table 1 (2092 amino acids) Uncharacterized ORF; Putative fatty acid synthase beta subunit; calcium downregulated; repressed by exposure to artemisinin; no human homolog	102.185	19.22	1	24	24	25	2092	231.898	6.27783
Afu4g09750	Afu6g10650	Afu6g10650 AspGDID:ASPL0000109420 COORDS:Chr6_A_fumigatus_Af293:2633292-2631089C, translated using codon table 1 (657 amino acids) Uncharacterized ORF; Putative ATP citrate lyase, subunit 1; protein induced by heat shock	100.128	45.97	1	20	20	24	657	71.9031	8.48486
Afu7g04070	Afu2g12520	Afu2g12520 AspGDID:ASPL0000103966 COORDS:Chr2_A_fumigatus_Af293:3215341-3219468W, translated using codon table 1 (1045 amino acids) Uncharacterized ORF; Ortholog of <i>A. nidulans FGSC A4</i> : AN6280, <i>A. niger CBS 513.88</i> : An02g04750, <i>A. oryzae RIB40</i> : AO090026000847, <i>Aspergillus wentii</i> : Aspwe1_0044488 and <i>Aspergillus sydowii</i> : Aspsy1_0150855	99.0143	25.65	1	16	16	23	1045	113.109	9.77393
Afu2g07520	Afu6g09920	Afu6g09920 AspGDID:ASPL0000109348 COORDS:Chr6_A_fumigatus_Af293:2439681-2441534W, translated using codon table 1 (617 amino acids) Uncharacterized ORF; Ortholog of <i>A. nidulans FGSC A4</i> : AN10946, <i>A. niger CBS 513.88</i> : An11g07970, <i>A. oryzae RIB40</i> : AO090001000626, <i>Neosartorya fischeri NRRL 181</i> : NFIA_055650 and <i>Aspergillus wentii</i> : Aspwe1_0045804	97.4712	47.81	1	19	19	24	617	65.3072	9.56885
Afu1g05490	Afu4g07360	metH AspGDID:ASPL0000106450 COORDS:Chr4_A_fumigatus_Af293:1914045-1911526C, translated using codon table 1 (774 amino acids) Uncharacterized ORF; Putative cobalamin-independent methionine synthase; protein induced by heat shock; Yap1-dependent induction in response to hydrogen peroxide; reacts with rabbit immunosera exposed to A. fumigatus conidia; no human homolog	96.4565	41.73	1	22	22	26	774	86.8405	6.78564
Afu2g02210	Afu3g09600	sik1 AspGDID:ASPL0000105358 COORDS:Chr3_A_fumigatus_Af293:2440680-2442368W, translated using codon table 1 (522 amino acids) Uncharacterized ORF; Ortholog(s) have role in rRNA processing and 90S preribosome, box C/D snoRNP complex, small-subunit processome localization	96.3947	45.98	1	17	17	22	522	58.1594	9.01221
Afu5g02210	Afu5g05450	rps1 AspGDID:ASPL0000107624 COORDS:Chr5_A_fumigatus_Af293:1266407-1265371C, translated using codon table 1 (256 amino acids) Uncharacterized ORF; 40S ribosomal protein S3Ae; 40S ribosomal protein S1; reacts with rabbit immunosera exposed to A. fumigatus conidia	92.9593	51.95	1	13	13	21	256	29.1829	10.0376
Afu2g11840	Afu5g10550	Afu5g10550 AspGDID:ASPL0000108119 COORDS:Chr5_A_fumigatus_Af293:2702208-2700129C, translated using codon table 1 (519 amino acids) Uncharacterized ORF; ATP synthase F1, beta subunit; reacts with rabbit immunosera exposed to A. fumigatus conidia; hypoxia induced protein	92.3531	51.25	1	17	17	21	519	55.586	5.43994
Afu6g09030	Afu2g09290	hsp60 AspGDID:ASPL0000103647 COORDS:Chr2_A_fumigatus_Af293:2378663-2376729C, translated using codon table 1 (587 amino acids) Verified ORF; Putative antigenic mitochondrial protein; reacts with rabbit immunosera exposed to A. fumigatus conidia; hypoxia induced protein	91.4691	45.32	1	17	17	21	587	61.9117	5.64307
Afu1g15460	Afu1g10350	pgkA AspGDID:ASPL0000102099 COORDS:Chr1_A_fumigatus_Af293:2666254-2667669W, translated using codon table 1 (417 amino acids) Verified ORF; Putative phosphoglycerate kinase; reacts with rabbit immunosera exposed to conidia; hypoxia induced protein; transcript up-regulated in conidia exposed to neutrophils; induced by gliotoxin exposure	90.8469	56.59	1	21	21	26	417	44.7338	6.7417
Afu4g04550	Afu4g06840	Afu4g06840 AspGDID:ASPL0000106398 COORDS:Chr4_A_fumigatus_Af293:1768008-1766126C, translated using codon table 1 (537 amino acids) Uncharacterized ORF; Has domain(s) with predicted nucleic acid binding, nucleotide binding activity	87.0584	46.93	1	15	15	20	537	58.2254	5.87158
Afu4g10540	Afu7g03680	Afu7g03680 AspGDID:ASPL0000110063 COORDS:Chr7_A_fumigatus_Af293:790326-786496C, translated using codon table 1 (1160 amino acids) Uncharacterized ORF; Ortholog(s) have inositol-polyphosphate 5-phosphatase activity and cell division site, cell tip, cytosol localization	86.2666	27.93	1	24	24	26	1160	129.673	6.72705
Afu4g04120	Afu3g11070	pdcA AspGDID:ASPL0000105505 COORDS:Chr3_A_fumigatus_Af293:2890318-2892286W, translated using codon table 1 (569 amino acids) Verified ORF; Putative pyruvate decarboxylase with a predicted role in pyruvate metabolism; reacts with rabbit immunosera exposed to A. fumigatus conidia; higher expression in 48 h biofilm vs planktonic cells; protein increases during hypoxia	84.6177	44.99	1	14	14	17	569	62.9591	6.53662
Afu2g15290	Afu6g04740	act1 AspGDID:ASPL0000108928 COORDS:Chr6_A_fumigatus_Af293:1114434-1113100C, translated using codon table 1 (393 amino acids) Verified ORF; Actin	83.6877	56.23	1	13	13	18	393	43.8651	6.27783
Afu6g08960	Afu1g03010	Afu1g03010 AspGDID:ASPL0000101471 COORDS:Chr1_A_fumigatus_Af293:869019-866374C, translated using codon table 1 (881 amino acids) Uncharacterized ORF; Ortholog(s) have U2-type spliceosomal complex localization	82.1503	26.22	1	18	18	22	881	100.781	9.94971
Afu3g10740	Afu2g09960	ssc70 AspGDID:ASPL0000103712 COORDS:Chr2_A_fumigatus_Af293:2553995-2551772C, translated using codon table 1 (661 amino acids) Verified ORF; Putative mitochondrial Hsp70 chaperone; reacts with rabbit immunosera exposed to A. fumigatus conidia; hypoxia induced protein	82.0725	46.14	1	21	21	23	661	71.9316	6.16357
Afu2g15760	Afu2g15550	Afu2g15550 AspGDID:ASPL0000104272 COORDS:Chr2_A_fumigatus_Af293:4104096-4101795C, translated using codon table 1 (712 amino acids) Uncharacterized ORF; Ortholog(s) have nitrate reductase (NADPH) activity and role in Mo-molybdopterin cofactor biosynthetic process	81.4533	42.56	1	17	17	20	712	74.4887	7.29834
Afu2g08990	Afu6g06770	aspf22 AspGDID:ASPL0000109039 COORDS:Chr6_A_fumigatus_Af293:1480347-1478847C, translated using codon table 1 (438 amino acids) Verified ORF; Putative enolase; allergen Asp f 22; conidia-enriched protein; transcript induced by growth on hydrogen peroxide; hypoxia induced protein; transcript induced by exposure to human airway epithelial cells	80.9942	42.01	1	12	12	18	438	47.2763	5.57959
Afu2g03580	Afu2g11850	rpL3 AspGDID:ASPL0000103899 COORDS:Chr2_A_fumigatus_Af293:3060721-3062260W, translated using codon table 1 (392 amino acids) Uncharacterized ORF; Allergenic ribosomal L3 protein; allergen Asp f 23; transcript induced in response to dibutyryl cyclic AMP	79.0634	47.45	1	18	18	19	392	44.4167	10.1841
Afu3g07710	Afu4g13170	cpcB AspGDID:ASPL0000107023 COORDS:Chr4_A_fumigatus_Af293:3449811-3448364C, translated using codon table 1 (316 amino acids) Verified ORF; G-protein complex beta subunit; conidia-enriched protein; immunoreactive	78.5445	64.24	1	13	13	17	316	34.9574	6.52197
Afu6g04010	Afu8g03930	hscA AspGDID:ASPL0000110728 COORDS:Chr8_A_fumigatus_Af293:839316-841607W, translated using codon table 1 (614 amino acids) Verified ORF; Putative Hsp70 chaperone; Yap1-dependent induction in response to hydrogen peroxide; hypoxia induced protein	77.5386	37.95	1	17	17	20	614	66.9316	5.38916
Afu3g11640	Afu1g06780	Afu1g06780 AspGDID:ASPL0000101846 COORDS:Chr1_A_fumigatus_Af293:1934366-1936614W, translated using codon table 1 (661 amino acids) Uncharacterized ORF; Ortholog(s) have cytosol, nucleus localization	74.6147	30.86	1	12	12	16	661	71.7523	6.44287
Afu7g02170	Afu2g08670	Afu2g08670 AspGDID:ASPL0000103586 COORDS:Chr2_A_fumigatus_Af293:2234495-2227401C, translated using codon table 1 (2292 amino acids) Uncharacterized ORF; Ortholog(s) have acetyl-CoA carboxylase activity, biotin carboxylase activity and role in long-chain fatty acid biosynthetic process, protein import into nucleus, regulation of mitosis	74.2525	13.74	1	20	20	21	2292	254.784	6.3667
Afu6g07760	Afu3g04210	Afu3g04210 AspGDID:ASPL0000104937 COORDS:Chr3_A_fumigatus_Af293:1188450-1182737C, translated using codon table 1 (1857 amino acids) Uncharacterized ORF; Fatty acid synthase alpha subunit; transcript induced by exposure to human airway epithelial cells; no human homolog	74.0171	14.65	1	19	19	22	1857	204.472	6.48096
Afu6g02420	Afu4g03160	Afu4g03160 AspGDID:ASPL0000106134 COORDS:Chr4_A_fumigatus_Af293:886361-887395W, translated using codon table 1 (344 amino acids) Uncharacterized ORF; Ortholog(s) have U2-type spliceosomal complex, cytosol localization	73.8123	47.97	1	11	11	16	344	37.7829	5.8208
Afu6g04970	Afu1g12390	Afu1g12390 AspGDID:ASPL0000102306 COORDS:Chr1_A_fumigatus_Af293:3269687-3271809W, translated using codon table 1 (568 amino acids) Uncharacterized ORF; Ortholog of S. cerevisiae SCD6; snoRNA Afu-200 encoded within intron 3	73.7021	30.99	1	10	10	14	568	59.2256	9.5542
Afu1g06790	Afu7g05660	Afu7g05660 AspGDID:ASPL0000110259 COORDS:Chr7_A_fumigatus_Af293:1376127-1379437W, translated using codon table 1 (1065 amino acids) Uncharacterized ORF; Putative translation elongation factor eEF-3; protein induced by heat shock and hypoxia	71.8292	25.82	1	14	15	17	1065	117.694	6.17627
Afu1g02890	Afu6g04570	Afu6g04570 AspGDID:ASPL0000108911 COORDS:Chr6_A_fumigatus_Af293:1060589-1062452W, translated using codon table 1 (482 amino acids) Uncharacterized ORF; Putative translational elongation factor eEF-1 gamma subunit; protein induced by heat shock; transcript induced by exposure to human airway epithelial cells; snoRNA Afu-328 encoded within intron 2	71.7124	44.4	1	17	17	20	482	54.1488	7.63525
Afu2g04010	Afu1g14220	nopA AspGDID:ASPL0000102490 COORDS:Chr1_A_fumigatus_Af293:3799657-3798472C, translated using codon table 1 (312 amino acids) Verified ORF; Nucleolar protein	70.6977	59.62	1	14	14	17	312	32.5521	10.2866
Afu2g03040	Afu2g08090	Afu2g08090 AspGDID:ASPL0000103529 COORDS:Chr2_A_fumigatus_Af293:2101134-2098578C, translated using codon table 1 (806 amino acids) Uncharacterized ORF; Protein of unknown function, phoB-regulated	70.2232	16.25	1	11	11	18	806	90.9972	9.87646
Afu2g07420	Afu6g08050	gnd1 AspGDID:ASPL0000109165 COORDS:Chr6_A_fumigatus_Af293:1868427-1870349W, translated using codon table 1 (491 amino acids) Verified ORF; 6-phosphogluconate dehydrogenase; conidia-enriched protein; protein induced by heat shock; reacts with rabbit immunosera exposed to conidia; hypoxia-induced protein; transcript induced by exposure to human airway epithelial cells	69.4569	42.57	1	15	15	19	491	54.1233	5.93506
Afu6g14170	Afu3g08520	Afu3g08520 AspGDID:ASPL0000105254 COORDS:Chr3_A_fumigatus_Af293:2185740-2187668W, translated using codon table 1 (600 amino acids) Uncharacterized ORF; Ortholog(s) have role in cell wall organization or biogenesis, cellular response to stress, regulation of transcription, DNA-templated	67.6935	32.67	1	14	14	18	600	64.3392	9.0708
Afu3g10700	Afu2g10090	Afu2g10090 AspGDID:ASPL0000103724 COORDS:Chr2_A_fumigatus_Af293:2584422-2583412C, translated using codon table 1 (153 amino acids) Uncharacterized ORF; 40S ribosomal protein S15	66.981	64.05	1	7	7	15	153	17.7036	10.0669
Afu1g02410	Afu1g05630	Afu1g05630 AspGDID:ASPL0000101731 COORDS:Chr1_A_fumigatus_Af293:1617319-1616207C, translated using codon table 1 (266 amino acids) Uncharacterized ORF; 40S ribosomal protein S3	66.3501	67.67	1	15	15	20	266	29.1832	9.1001
Afu3g09910	Afu5g03130	Afu5g03130 AspGDID:ASPL0000107492 COORDS:Chr5_A_fumigatus_Af293:847533-849130W, translated using codon table 1 (436 amino acids) Uncharacterized ORF; Ortholog(s) have sequence-specific DNA binding activity	66.0286	42.2	1	9	9	12	436	48.9211	5.021
Afu1g04950	Afu1g07280	Afu1g07280 AspGDID:ASPL0000101895 COORDS:Chr1_A_fumigatus_Af293:2064833-2066406W, translated using codon table 1 (447 amino acids) Uncharacterized ORF; Ortholog of <i>A. nidulans FGSC A4</i> : AN5141, <i>A. niger CBS 513.88</i> : An07g09830, <i>A. oryzae RIB40</i> : AO090012000982, <i>Aspergillus wentii</i> : Aspwe1_0172497 and <i>Aspergillus sydowii</i> : Aspsy1_0033440	65.9538	33.11	1	10	10	14	447	47.0054	5.42725
Afu3g07790	Afu6g10660	Afu6g10660 AspGDID:ASPL0000109421 COORDS:Chr6_A_fumigatus_Af293:2635628-2637150W, translated using codon table 1 (486 amino acids) Uncharacterized ORF; Putative ATP citrate lyase subunit; repressed by gliotoxin exposure22405895	65.7618	44.86	1	16	16	19	486	52.8847	6.26514
Afu2g06040	Afu6g12300	Afu6g12300 AspGDID:ASPL0000109574 COORDS:Chr6_A_fumigatus_Af293:3095007-3092936C, translated using codon table 1 (478 amino acids) Verified ORF; RNP domain protein; conidia-enriched protein	65.0368	37.03	1	12	12	16	478	51.7352	9.5542
Afu1g02670	Afu5g06240	alcC AspGDID:ASPL0000107700 COORDS:Chr5_A_fumigatus_Af293:1495619-1494455C, translated using codon table 1 (350 amino acids) Verified ORF; Putative zinc-dependent alcohol dehydrogenase, involved in ethanol fermentation; predicted gene pair with adh1; protein induced by hydrogen peroxide; reacts with rabbit immunosera exposed to A. fumigatus conidia	64.4963	57.14	1	15	15	17	350	37.1563	7.63525
Afu1g14640	Afu8g05320	Afu8g05320 AspGDID:ASPL0000110862 COORDS:Chr8_A_fumigatus_Af293:1239645-1241741W, translated using codon table 1 (556 amino acids) Verified ORF; Putative mitochondrial F1 ATPase subunit alpha; hypoxia induced protein	64.017	34.17	1	17	17	19	556	59.8954	9.0708
Afu5g08520	Afu1g10630	Afu1g10630 AspGDID:ASPL0000102127 COORDS:Chr1_A_fumigatus_Af293:2776408-2774958C, translated using codon table 1 (387 amino acids) Uncharacterized ORF; Putative S-adenosylmethionine synthetase; higher expression in 48 h biofilm vs planktonic cells; hypoxia induced protein	63.7666	54.26	1	13	13	15	387	42.1698	6.01123
Afu5g12130	Afu4g06620	Afu4g06620 AspGDID:ASPL0000106377 COORDS:Chr4_A_fumigatus_Af293:1712343-1713780W, translated using codon table 1 (458 amino acids) Uncharacterized ORF; Glutamate/Leucine/Phenylalanine/Valine dehydrogenase; reacts with rabbit immunosera exposed to A. fumigatus conidia; hypoxia induced protein	63.5768	48.69	1	14	14	16	458	49.3369	6.1001
Afu6g10060	Afu6g06750	Afu6g06750 AspGDID:ASPL0000109037 COORDS:Chr6_A_fumigatus_Af293:1474803-1476209W, translated using codon table 1 (272 amino acids) Uncharacterized ORF; 14-3-3 family protein; predicted gene pair with AFUA_2G03290 (artA)	61.5062	50.74	1	9	10	14	272	30.6832	4.91943
Afu6g02910	Afu5g09230	Afu5g09230 AspGDID:ASPL0000107992 COORDS:Chr5_A_fumigatus_Af293:2377061-2378400W, translated using codon table 1 (324 amino acids) Verified ORF; Putative transaldolase; abundant protein in conidia and mycelia; protein induced by hydrogen peroxide and hypoxia	61.1972	58.33	1	15	15	17	324	35.4265	6.44287
Afu5g00720	Afu1g12890	Afu1g12890 AspGDID:ASPL0000102357 COORDS:Chr1_A_fumigatus_Af293:3406505-3407674W, translated using codon table 1 (300 amino acids) Uncharacterized ORF; Putative 60S Ribosomal protein L5	60.9888	58.33	1	11	11	14	300	34.7819	8.93896
Afu1g05610	Afu4g11650	kgd1 AspGDID:ASPL0000106873 COORDS:Chr4_A_fumigatus_Af293:3079845-3083210W, translated using codon table 1 (1057 amino acids) Uncharacterized ORF; Putative alpha-ketoglutarate dehydrogenase complex subunit; protein induced by heat shock	60.6895	19.68	1	15	15	18	1057	118.826	6.94678
Afu1g10560	Afu5g03020	Afu5g03020 AspGDID:ASPL0000107481 COORDS:Chr5_A_fumigatus_Af293:806662-808051W, translated using codon table 1 (373 amino acids) Uncharacterized ORF; 60S ribosomal protein L4	60.421	40.75	1	12	12	15	373	40.479	10.9604
Afu4g03650	Afu1g12610	hsp88 AspGDID:ASPL0000102329 COORDS:Chr1_A_fumigatus_Af293:3331407-3333764W, translated using codon table 1 (714 amino acids) Uncharacterized ORF; Hsp70 chaperone; conidia-enriched protein; induction in response to hydrogen peroxide Yap1-dependent	59.4671	27.17	1	14	14	16	714	79.9949	5.17334
Afu5g12260	Afu2g10440	Afu2g10440 AspGDID:ASPL0000103759 COORDS:Chr2_A_fumigatus_Af293:2672089-2671408C, translated using codon table 1 (150 amino acids) Uncharacterized ORF; Ortholog(s) have mRNA binding, small ribosomal subunit rRNA binding activity and role in maturation of SSU-rRNA from tricistronic rRNA transcript (SSU-rRNA, 5.8S rRNA, LSU-rRNA), ribosomal small subunit assembly	59.3457	57.33	1	7	7	12	150	15.8224	10.7114
Afu2g11290	Afu4g13730	Afu4g13730 AspGDID:ASPL0000107079 COORDS:Chr4_A_fumigatus_Af293:3595758-3593623C, translated using codon table 1 (684 amino acids) Uncharacterized ORF; Ortholog of <i>A. nidulans FGSC A4</i> : AN5667, <i>A. oryzae RIB40</i> : AO090009000198, <i>Aspergillus wentii</i> : Aspwe1_0047212, <i>Aspergillus sydowii</i> : Aspsy1_0030299 and <i>Aspergillus terreus NIH2624</i> : ATET_03253	59.3429	30.99	1	13	13	16	684	73.7219	9.34912
Afu4g05830	Afu3g11830	pgmA AspGDID:ASPL0000105579 COORDS:Chr3_A_fumigatus_Af293:3113884-3115685W, translated using codon table 1 (555 amino acids) Uncharacterized ORF; Putative phosphoglucomutase; reacts with rabbit immunosera exposed to A. fumigatus conidia; hypoxia repressed protein; transcript up-regulated in conidia exposed to neutrophils	59.2555	37.84	1	16	16	18	555	60.4637	6.75635
Afu5g11120	Afu6g07770	Afu6g07770 AspGDID:ASPL0000109137 COORDS:Chr6_A_fumigatus_Af293:1773673-1775224W, translated using codon table 1 (501 amino acids) Uncharacterized ORF; Putative alanine aminotransferase	58.1892	35.53	1	12	12	16	501	55.1004	5.96045
Afu2g09140	Afu1g02550	Afu1g02550 AspGDID:ASPL0000101425 COORDS:Chr1_A_fumigatus_Af293:746335-744583C, translated using codon table 1 (448 amino acids) Uncharacterized ORF; Tubulin alpha-1 subunit; gene pair with AFUA_2G14990 (tubulin alpha-2 subunit)	57.6211	39.96	1	11	12	14	448	49.9932	5.09717
Afu8g02840	Afu4g12450	Afu4g12450 AspGDID:ASPL0000106952 COORDS:Chr4_A_fumigatus_Af293:3270803-3272689W, translated using codon table 1 (541 amino acids) Uncharacterized ORF; Putative PH domain protein; conserved lysine-rich protein; Yap1-dependent induction in response to hydrogen peroxide; hypoxia repressed protein	57.2033	48.06	1	13	13	13	541	56.9689	5.03369
Afu5g07000	Afu6g13460	Afu6g13460 AspGDID:ASPL0000109687 COORDS:Chr6_A_fumigatus_Af293:3429190-3426694C, translated using codon table 1 (814 amino acids) Uncharacterized ORF; Ortholog of <i>A. nidulans FGSC A4</i> : AN5448, <i>A. niger CBS 513.88</i> : An08g08850, <i>Neosartorya fischeri NRRL 181</i> : NFIA_059420, <i>Aspergillus wentii</i> : Aspwe1_0194392 and <i>Aspergillus versicolor</i> : Aspve1_0053254	56.7288	27.52	1	17	17	21	814	90.3871	8.47021
Afu3g12640	Afu4g13120	Afu4g13120 AspGDID:ASPL0000107018 COORDS:Chr4_A_fumigatus_Af293:3436372-3434668C, translated using codon table 1 (358 amino acids) Uncharacterized ORF; Putative glutamine synthetase; protein induced by heat shock and by hydrogen peroxide; transcript induced by exposure to human airway epithelial cells	56.6344	46.93	1	11	11	14	358	39.8744	5.70654
Afu5g06340	Afu3g06840	Afu3g06840 AspGDID:ASPL0000105095 COORDS:Chr3_A_fumigatus_Af293:1702997-1704159W, translated using codon table 1 (261 amino acids) Uncharacterized ORF; Putative cytosolic small ribosomal subunit S4	56.5448	41.76	1	10	10	16	261	29.4728	10.0669
Afu5g08190	Afu1g15810	Afu1g15810 AspGDID:ASPL0000102644 COORDS:Chr1_A_fumigatus_Af293:4274274-4272405C, translated using codon table 1 (566 amino acids) Uncharacterized ORF; Ortholog(s) have role in ascospore formation, sporocarp development involved in sexual reproduction and nucleus localization	55.827	26.33	1	9	9	13	566	63.936	9.37842
Afu7g01840	Afu5g01970	gpdA AspGDID:ASPL0000107377 COORDS:Chr5_A_fumigatus_Af293:503797-505194W, translated using codon table 1 (338 amino acids) Verified ORF; Glyceraldehyde-3-phosphate dehydrogenase; predicted gene pair with AFUA_5G01030; protein induced by hydrogen peroxide; reacts with rabbit immunosera exposed to A. fumigatus conidia: induced by L-tyrosine	55.1384	42.9	1	11	11	14	338	36.2916	7.43018
Afu6g12580	Afu5g03290	Afu5g03290 AspGDID:ASPL0000107508 COORDS:Chr5_A_fumigatus_Af293:891751-889972C, translated using codon table 1 (566 amino acids) Uncharacterized ORF; Ortholog of <i>A. nidulans FGSC A4</i> : AN8197, <i>A. niger CBS 513.88</i> : An09g05540, <i>A. oryzae RIB40</i> : AO090102000532, <i>Aspergillus wentii</i> : Aspwe1_0115831 and <i>Aspergillus sydowii</i> : Aspsy1_0211779	54.958	29.68	1	10	10	12	566	62.6301	9.89111
Afu5g02850	Afu1g12170	Afu1g12170 AspGDID:ASPL0000102283 COORDS:Chr1_A_fumigatus_Af293:3214725-3216299W, translated using codon table 1 (440 amino acids) Uncharacterized ORF; Putative translation elongation factor EF-Tu; hypoxia induced protein	54.1632	33.18	1	11	11	15	440	48.2559	7.18115
Afu2g10620	Afu3g08160	tif1 AspGDID:ASPL0000105219 COORDS:Chr3_A_fumigatus_Af293:2095759-2094223C, translated using codon table 1 (406 amino acids) Verified ORF; Eukaryotic translation initiation factor eIF4A; ATP-dependent RNA helicase; protein induced by heat shock; predicted gene pair with AFUA_5G02410	53.6662	38.18	1	13	13	14	406	45.7494	5.18604
Afu6g02140	Afu2g09210	Afu2g09210 AspGDID:ASPL0000103639 COORDS:Chr2_A_fumigatus_Af293:2359448-2360452W, translated using codon table 1 (223 amino acids) Uncharacterized ORF; 60S ribosomal protein L10; reacts with rabbit immunosera exposed to A. fumigatus conidia	53.0989	53.36	1	13	13	15	223	25.5705	10.3159
Afu6g06350	Afu6g12930	acoA AspGDID:ASPL0000109636 COORDS:Chr6_A_fumigatus_Af293:3262693-3265559W, translated using codon table 1 (787 amino acids) Verified ORF; Mitochondrial aconitate hydratase; citric acid cycle enzyme; protein abundant in conidia; transcript induced in conidia exposed to neutrophils; reacts with rabbit immunosera exposed to A. fumigatus conidia; hypoxia induced	52.9883	28.72	1	15	15	15	787	85.4752	6.7124
Afu4g08600	Afu6g11310	Afu6g11310 AspGDID:ASPL0000109481 COORDS:Chr6_A_fumigatus_Af293:2801160-2808052W, translated using codon table 1 (2256 amino acids) Uncharacterized ORF; Ortholog(s) have GMP synthase (glutamine-hydrolyzing) activity, aspartate carbamoyltransferase activity, carbamoyl-phosphate synthase (glutamine-hydrolyzing) activity, dihydroorotase activity	52.7289	10.82	1	18	19	19	2256	248.298	6.58057
Afu4g07650	Afu8g04410	Afu8g04410 AspGDID:ASPL0000110776 COORDS:Chr8_A_fumigatus_Af293:991594-993920W, translated using codon table 1 (710 amino acids) Uncharacterized ORF; Ortholog of <i>A. nidulans FGSC A4</i> : AN1453, <i>A. niger CBS 513.88</i> : An16g08630, <i>Aspergillus wentii</i> : Aspwe1_0117354, <i>Aspergillus sydowii</i> : Aspsy1_0143599 and <i>Aspergillus terreus NIH2624</i> : ATET_00054	52.3424	28.31	1	14	14	14	710	77.9938	5.60498
Afu5g09860	Afu1g13500	tktA AspGDID:ASPL0000102418 COORDS:Chr1_A_fumigatus_Af293:3591128-3588583C, translated using codon table 1 (684 amino acids) Verified ORF; Putative transketolase; protein abundant in conidia; protein induced by heat shock and by hydrogen peroxide; reacts with rabbit immunosera exposed to A. fumigatus conidia	52.1972	23.1	1	14	14	16	684	74.7807	6.59521
Afu4g12080	Afu5g14680	Afu5g14680 AspGDID:ASPL0000108517 COORDS:Chr5_A_fumigatus_Af293:3799759-3800442W, translated using codon table 1 (227 amino acids) Verified ORF; Protein with Yap1-dependent induction in response to hydrogen peroxide; calcium downregulated; induced by gliotoxin exposure	51.9493	71.37	1	11	11	13	227	25.4229	4.90674
Afu1g03300	Afu2g09490	Afu2g09490 AspGDID:ASPL0000103667 COORDS:Chr2_A_fumigatus_Af293:2422679-2427552W, translated using codon table 1 (1525 amino acids) Uncharacterized ORF; Eukaryotic translation initiation factor subunit eIF-4F	51.9485	11.08	1	10	10	12	1525	163.883	9.36377
Afu2g01160	Afu3g04180	Afu3g04180 AspGDID:ASPL0000104934 COORDS:Chr3_A_fumigatus_Af293:1178361-1177325C, translated using codon table 1 (267 amino acids) Uncharacterized ORF; Has domain(s) with predicted nucleic acid binding, zinc ion binding activity	51.8227	31.84	1	6	6	11	267	29.0843	7.76709
Afu2g09120	Afu1g13570	Afu1g13570 AspGDID:ASPL0000102425 COORDS:Chr1_A_fumigatus_Af293:3610148-3609177C, translated using codon table 1 (286 amino acids) Uncharacterized ORF; Ortholog(s) have box H/ACA snoRNA binding activity, role in rRNA pseudouridine synthesis, snRNA pseudouridine synthesis and box H/ACA snoRNP complex localization	51.7912	17.13	1	6	6	11	286	31.2846	8.98291
Afu2g04760	Afu3g09320	Afu3g09320 AspGDID:ASPL0000105330 COORDS:Chr3_A_fumigatus_Af293:2359631-2361249W, translated using codon table 1 (471 amino acids) Uncharacterized ORF; Serine hydroxymethyltransferase; protein level decreases upon heat shock; reacts with rabbit immunosera exposed to A. fumigatus conidia; hypoxia induced protein; SrbA-regulated during hypoxia	51.2429	35.03	1	13	14	16	471	51.8405	7.75244
Afu3g13440	Afu6g06370	Afu6g06370 AspGDID:ASPL0000108998 COORDS:Chr6_A_fumigatus_Af293:1367479-1369026W, translated using codon table 1 (386 amino acids) Uncharacterized ORF; NAD(+)-isocitrate dehydrogenase subunit I	50.5956	38.34	1	12	12	13	386	41.9387	8.74854
Afu6g12080	Afu2g10750	Afu2g10750 AspGDID:ASPL0000103790 COORDS:Chr2_A_fumigatus_Af293:2752834-2755410W, translated using codon table 1 (549 amino acids) Uncharacterized ORF; Putative RNA helicase; transcript induced by exposure to human airway epithelial cells	49.9124	29.33	1	10	11	12	549	60.3154	9.23193
Afu4g07140	Afu2g03390	rpdA AspGDID:ASPL0000103168 COORDS:Chr2_A_fumigatus_Af293:895852-893605C, translated using codon table 1 (688 amino acids) Verified ORF; Putative histone deacetylase; probable essential gene; required for cell growth and conidiation	49.4484	27.33	1	13	13	14	688	75.9845	4.729
Afu6g02940	Afu1g15020	Afu1g15020 AspGDID:ASPL0000102569 COORDS:Chr1_A_fumigatus_Af293:4039457-4040397W, translated using codon table 1 (215 amino acids) Uncharacterized ORF; 40S ribosomal protein S5; reacts with rabbit immunosera exposed to A. fumigatus conidia	48.9822	49.77	1	8	8	10	215	23.8905	9.21729
Afu4g06060	Afu6g06340	gfa1 AspGDID:ASPL0000108994 COORDS:Chr6_A_fumigatus_Af293:1344619-1347035W, translated using codon table 1 (694 amino acids) Uncharacterized ORF; Ortholog(s) have glutamine-fructose-6-phosphate transaminase (isomerizing) activity	48.7651	21.76	1	12	12	14	694	77.2379	6.69775
	Afu2g09650	Afu2g09650 AspGDID:ASPL0000103682 COORDS:Chr2_A_fumigatus_Af293:2480020-2481781W, translated using codon table 1 (469 amino acids) Uncharacterized ORF; Aspartate transaminase; induced by L-tyrosine; transcript up-regulated in conidia exposed to neutrophils	48.6383	34.12	1	12	12	13	469	51.1509	8.48486
	Afu6g12990	Afu6g12990 AspGDID:ASPL0000109642 COORDS:Chr6_A_fumigatus_Af293:3280512-3279334C, translated using codon table 1 (263 amino acids) Uncharacterized ORF; Putative cytosolic large ribosomal subunit protein L7A	48.3877	39.16	1	10	10	12	263	29.4273	10.2573
	Afu1g10910	tubA AspGDID:ASPL0000102154 COORDS:Chr1_A_fumigatus_Af293:2850137-2848155C, translated using codon table 1 (466 amino acids) Uncharacterized ORF; Beta-tubulin; predicted gene pair with AFUA_7G00250 (tubulin beta-2 subunit); protein induced by hydrogen peroxide	48.2859	32.4	1	8	8	9	466	51.7606	4.86865
	Afu3g14490	Afu3g14490 AspGDID:ASPL0000105838 COORDS:Chr3_A_fumigatus_Af293:3844977-3843396C, translated using codon table 1 (508 amino acids) Uncharacterized ORF; Putative ketol acid reductoisomerase; transcript induced by exposure to human airway epithelial cells; no human homolog	48.2662	27.95	1	13	13	14	508	56.3183	9.29053
	Afu4g10800	Afu4g10800 AspGDID:ASPL0000106793 COORDS:Chr4_A_fumigatus_Af293:2823433-2822224C, translated using codon table 1 (237 amino acids) Uncharacterized ORF; 40S ribosomal protein S6	48.23	44.3	1	11	11	14	237	27.263	10.8433
	Afu5g06360	Afu5g06360 AspGDID:ASPL0000107712 COORDS:Chr5_A_fumigatus_Af293:1531695-1530676C, translated using codon table 1 (254 amino acids) Uncharacterized ORF; 60S ribosomal protein L8; transcript induced by exposure to human airway epithelial cells	47.9921	47.64	1	8	8	12	254	27.4688	10.9751
	Afu1g11080	kin1 AspGDID:ASPL0000102171 COORDS:Chr1_A_fumigatus_Af293:2914190-2917536W, translated using codon table 1 (1072 amino acids) Uncharacterized ORF; Predicted protein serine/threonine kinase	47.3512	23.6	1	15	15	15	1072	118.856	9.70068
	Afu1g11190	Afu1g11190 AspGDID:ASPL0000102182 COORDS:Chr1_A_fumigatus_Af293:2947142-2948249W, translated using codon table 1 (227 amino acids) Verified ORF; Putative eukaryotic translation elongation factor 1 subunit eEF1-beta; reacts with rabbit immunosera exposed to A. fumigatus conidia; induced by gliotoxin exposure	46.8359	52.86	1	9	9	12	227	25.2295	4.55127
	Afu6g04940	Afu6g04940 AspGDID:ASPL0000108948 COORDS:Chr6_A_fumigatus_Af293:1165667-1171182W, translated using codon table 1 (1800 amino acids) Uncharacterized ORF; Ortholog(s) have cytoskeletal protein binding, profilin binding activity	46.815	9.94	1	13	13	13	1800	199.272	6.354
	Afu6g05210	Afu6g05210 AspGDID:ASPL0000108976 COORDS:Chr6_A_fumigatus_Af293:1250905-1252499W, translated using codon table 1 (330 amino acids) Verified ORF; Putative NAD-dependent malate dehydrogenase with a predicted role in the citric acid cycle; transcript up-regulated in conidia exposed to neutrophils; phoB-regulated; reacts with rabbit immunosera exposed to A. fumigatus conidia	46.6411	43.64	1	10	10	12	330	34.7885	7.23975
	Afu6g02280	aspf3 AspGDID:ASPL0000108683 COORDS:Chr6_A_fumigatus_Af293:408478-407732C, translated using codon table 1 (168 amino acids) Verified ORF; Allergen Asp f 3; peroxiredoxin family reductase; putative peroxismal membrane protein; IgE binding; protein induced by heat shock and by exposure to hydrogen peroxide; hypoxia induced protein; induced by gliotoxin exposure	45.6933	72.02	1	9	9	12	168	18.4414	5.57959
	Afu5g10770	Afu5g10770 AspGDID:ASPL0000108139 COORDS:Chr5_A_fumigatus_Af293:2751921-2754552W, translated using codon table 1 (820 amino acids) Uncharacterized ORF; Ortholog(s) have cytoplasmic mRNA processing body, cytosol localization	45.5571	21.22	1	13	13	15	820	90.9857	6.27783
	Afu5g13450	Afu5g13450 AspGDID:ASPL0000108398 COORDS:Chr5_A_fumigatus_Af293:3535793-3536876W, translated using codon table 1 (249 amino acids) Verified ORF; Putative triosephosphate isomerase; protein abundant in conidia; reacts with rabbit immunosera exposed to A. fumigatus conidia' transcript induced by exposure to human airway epithelial cells	45.0886	54.22	1	8	8	10	249	27.1124	5.79541
	Afu2g03290	artA AspGDID:ASPL0000103158 COORDS:Chr2_A_fumigatus_Af293:868250-867203C, translated using codon table 1 (261 amino acids) Verified ORF; 14-3-3 family protein; predicted gene pair with AFUA_6G06750; conidia-enriched protein; protein induced by hydrogen peroxide; reacts with rabbit immunosera exposed to A. fumigatus conidia; hypoxia repressed protein	44.9891	38.7	1	7	8	11	261	29.0836	4.84326
	Afu6g04920	fdh AspGDID:ASPL0000108946 COORDS:Chr6_A_fumigatus_Af293:1161764-1163212W, translated using codon table 1 (418 amino acids) Verified ORF; Putative NAD-dependent formate dehydrogenase; protein more abundant in conidia than mycelia; transcript up-regulated in conidia exposed to neutrophils; protein induced by heat shock; SrbA-regulated during hypoxia	44.6842	44.26	1	14	14	14	418	45.7177	8.26514
	Afu2g15840	Afu2g15840 AspGDID:ASPL0000104301 COORDS:Chr2_A_fumigatus_Af293:4185756-4183151C, translated using codon table 1 (804 amino acids) Uncharacterized ORF; Ortholog of <i>A. nidulans FGSC A4</i> : AN9067/tinC, AN2167/hetC, <i>A. fumigatus Af293</i> : Afu7g02570, <i>A. niger CBS 513.88</i> : An15g06140 and <i>A. oryzae RIB40</i> : AO090038000633, AO090012000230	44.4789	18.16	1	12	12	14	804	88.6335	6.81494
	Afu1g09390	Afu1g09390 AspGDID:ASPL0000102005 COORDS:Chr1_A_fumigatus_Af293:2433870-2432848C, translated using codon table 1 (303 amino acids) Uncharacterized ORF; Ortholog of <i>A. niger CBS 513.88</i> : An08g00930, <i>A. oryzae RIB40</i> : AO090005001586, <i>Neosartorya fischeri NRRL 181</i> : NFIA_016220, <i>Aspergillus wentii</i> : Aspwe1_0024550 and <i>Aspergillus versicolor</i> : Aspve1_0119823	44.3756	27.39	1	8	8	12	303	34.7225	11.3853
	Afu7g03910	Afu7g03910 AspGDID:ASPL0000110086 COORDS:Chr7_A_fumigatus_Af293:878642-880573W, translated using codon table 1 (643 amino acids) Uncharacterized ORF; Ortholog(s) have role in conidium formation, negative regulation of conidium formation and positive regulation of sexual sporulation resulting in formation of a cellular spore, <a href="#GOsection">more</a>	44.2451	18.35	1	7	7	12	643	67.6066	7.60596
	Afu2g02070	Afu2g02070 AspGDID:ASPL0000103037 COORDS:Chr2_A_fumigatus_Af293:511840-513846W, translated using codon table 1 (620 amino acids) Uncharacterized ORF; Ortholog(s) have cytosol localization	44.2344	21.94	1	10	10	11	620	69.1576	6.32861
	Afu1g10130	Afu1g10130 AspGDID:ASPL0000102077 COORDS:Chr1_A_fumigatus_Af293:2611841-2610281C, translated using codon table 1 (446 amino acids) Uncharacterized ORF; Putative adenosylhomocysteinase; protein induced by heat shock	44.2267	29.6	1	11	11	14	446	48.4589	6.21436
	Afu3g09080	Afu3g09080 AspGDID:ASPL0000105307 COORDS:Chr3_A_fumigatus_Af293:2315880-2313896C, translated using codon table 1 (586 amino acids) Uncharacterized ORF; Ortholog(s) have nucleus localization	43.3329	25.09	1	10	10	11	586	65.2513	9.31982
	Afu3g10920	stm1 AspGDID:ASPL0000105490 COORDS:Chr3_A_fumigatus_Af293:2843930-2842516C, translated using codon table 1 (304 amino acids) Uncharacterized ORF; Telomere and ribosome associated protein	42.9521	42.43	1	13	13	13	304	33.747	9.59814
	Afu6g02470	Afu6g02470 AspGDID:ASPL0000108702 COORDS:Chr6_A_fumigatus_Af293:466824-464770C, translated using codon table 1 (582 amino acids) Uncharacterized ORF; Putative fumarate hydratase; reacts with rabbit immunosera exposed to A. fumigatus conidia	42.7754	27.15	1	9	9	10	582	63.1195	8.96826
	Afu5g07180	Afu5g07180 AspGDID:ASPL0000107793 COORDS:Chr5_A_fumigatus_Af293:1781990-1789479W, translated using codon table 1 (2473 amino acids) Uncharacterized ORF; Ortholog(s) have nucleus localization	42.5004	7.2	1	14	14	15	2473	274.127	8.17725
	Afu5g07370	Afu5g07370 AspGDID:ASPL0000107811 COORDS:Chr5_A_fumigatus_Af293:1844081-1842511C, translated using codon table 1 (500 amino acids) Uncharacterized ORF; Ortholog(s) have metal ion binding, poly(A)-specific ribonuclease activity	42.4424	21.8	1	8	8	10	500	53.7507	7.07861
	Afu1g09060	Afu1g09060 AspGDID:ASPL0000101972 COORDS:Chr1_A_fumigatus_Af293:2350956-2349169C, translated using codon table 1 (512 amino acids) Uncharacterized ORF; Ortholog(s) have Rpd3L-Expanded complex, Rpd3S complex localization	42.3408	24.8	1	9	9	12	512	56.7913	4.80518
	Afu7g01830	ugp1 AspGDID:ASPL0000109978 COORDS:Chr7_A_fumigatus_Af293:488718-487183C, translated using codon table 1 (511 amino acids) Verified ORF; UTP-glucose-1-phosphate uridylyltransferase; induced by hydrogen peroxide; hypoxia repressed protein	42.3114	31.51	1	11	11	11	511	56.8895	6.87354
	Afu4g11730	gldB AspGDID:ASPL0000106881 COORDS:Chr4_A_fumigatus_Af293:3102011-3103045W, translated using codon table 1 (325 amino acids) Verified ORF; Putative glycerol dehydrogenase; calcium induced; transcript induced by exposure to human airway epithelial cells	42.2251	43.38	1	9	9	10	325	36.8047	6.3667
	Afu4g12390	Afu4g12390 AspGDID:ASPL0000106946 COORDS:Chr4_A_fumigatus_Af293:3243337-3244737W, translated using codon table 1 (394 amino acids) Uncharacterized ORF; Ortholog(s) have role in negative regulation of induction of conjugation with cellular fusion, negative regulation of transcription from RNA polymerase II promoter and cytoplasm, nucleus localization	42.203	31.22	1	9	9	11	394	43.1402	7.21045
	Afu3g07640	pma1 AspGDID:ASPL0000105170 COORDS:Chr3_A_fumigatus_Af293:1930419-1933527W, translated using codon table 1 (988 amino acids) Verified ORF; Putative plasma membrane H+ ATPase; transcript upregulated during conidial germination and in response to amphotericin B; protein and transcript levels downregulated by caspofungin treatment	41.7918	18.52	1	10	10	11	988	108.923	5.36377
	Afu3g08380	ipp1 AspGDID:ASPL0000105241 COORDS:Chr3_A_fumigatus_Af293:2149763-2148296C, translated using codon table 1 (396 amino acids) Uncharacterized ORF; Putative inorganic diphosphatase; reacts with rabbit immunosera exposed to A. fumigatus conidia	40.8333	42.42	1	14	14	14	396	43.5964	7.76709
	Afu1g04070	Afu1g04070 AspGDID:ASPL0000101576 COORDS:Chr1_A_fumigatus_Af293:1161707-1160930C, translated using codon table 1 (157 amino acids) Uncharacterized ORF; Eukaryotic initiation factor 5A; Yap1-dependent induction in response to hydrogen peroxide	40.6348	42.68	1	6	6	8	157	17.1983	5.40186
	Afu3g11860	eb1 AspGDID:ASPL0000105582 COORDS:Chr3_A_fumigatus_Af293:3124507-3123064C, translated using codon table 1 (278 amino acids) Uncharacterized ORF; Putative microtubule associated protein	40.5319	44.6	1	8	8	9	278	30.6318	7.48877
	Afu3g09770	Afu3g09770 AspGDID:ASPL0000105375 COORDS:Chr3_A_fumigatus_Af293:2501138-2504109W, translated using codon table 1 (922 amino acids) Uncharacterized ORF; Has domain(s) with predicted nucleic acid binding, nucleotide binding activity	40.2499	14.75	1	13	13	15	922	100.771	8.49951
	Afu4g10410	Afu4g10410 AspGDID:ASPL0000106755 COORDS:Chr4_A_fumigatus_Af293:2732043-2730416C, translated using codon table 1 (429 amino acids) Uncharacterized ORF; Putative aspartate aminotransferase; reacts with rabbit immunosera exposed to A. fumigatus conidia; hypoxia induced protein; transcript induced in conidia exposed to neutrophils or to human airway epithelial cells	40.0271	28.21	1	11	11	11	429	46.9681	8.86572
	Afu4g07740	Afu4g07740 AspGDID:ASPL0000106489 COORDS:Chr4_A_fumigatus_Af293:2023797-2025143W, translated using codon table 1 (357 amino acids) Uncharacterized ORF; Ortholog of <i>Aspergillus fumigatus A1163</i> : AFUB_064840 and <i>Aspergillus niger ATCC 1015</i> : 44190-mRNA	39.7451	19.89	1	8	8	10	357	37.0461	10.3599
	Afu2g04620	bipA AspGDID:ASPL0000103288 COORDS:Chr2_A_fumigatus_Af293:1260682-1258486C, translated using codon table 1 (672 amino acids) Uncharacterized ORF; Hsp70 chaperone; protein enriched in dormant conidia	39.6162	21.88	1	10	11	12	672	73.3395	5.03369
	Afu7g05740	Afu7g05740 AspGDID:ASPL0000110266 COORDS:Chr7_A_fumigatus_Af293:1404497-1405787W, translated using codon table 1 (340 amino acids) Verified ORF; Putative NAD-dependent malate dehydrogenase; protein abundant in conidia; immunoreactive; reacts with rabbit immunosera exposed to A. fumigatus conidia; induced by L-tyrosine; transcript downregulated in response to hypoxia	39.4402	36.76	1	8	8	9	340	35.8761	9.08545
	Afu4g07700	Afu4g07700 AspGDID:ASPL0000106485 COORDS:Chr4_A_fumigatus_Af293:2006286-2011744W, translated using codon table 1 (1679 amino acids) Uncharacterized ORF; Clathrin, heavy chain; transcript downregulated in response to amphotericin B	39.1481	10.48	1	12	12	12	1679	191.183	5.33838
	Afu8g04000	erg10B AspGDID:ASPL0000110735 COORDS:Chr8_A_fumigatus_Af293:855589-857056W, translated using codon table 1 (401 amino acids) Uncharacterized ORF; Putative acetyl-coenzyme A acetyltransferase; protein induced by hydrogen peroxide; higher expression in 48 h biofilm vs planktonic cells; SrbA-regulated during hypoxia	38.9581	42.39	1	10	10	11	401	41.2165	6.87354
	Afu2g17110	cdc48 AspGDID:ASPL0000104427 COORDS:Chr2_A_fumigatus_Af293:4568058-4570820W, translated using codon table 1 (819 amino acids) Uncharacterized ORF; Putative cell division control protein; protein induced by heat shock	38.8189	18.44	1	11	11	12	819	90.162	5.22412
	Afu2g05520	Afu2g05520 AspGDID:ASPL0000103375 COORDS:Chr2_A_fumigatus_Af293:1539047-1543267W, translated using codon table 1 (1350 amino acids) Uncharacterized ORF; Ortholog of <i>A. nidulans FGSC A4</i> : AN7496, <i>A. niger CBS 513.88</i> : An02g13860, <i>A. oryzae RIB40</i> : AO090001000663, <i>Aspergillus wentii</i> : Aspwe1_0121457 and <i>Aspergillus sydowii</i> : Aspsy1_0058467	38.5072	10.15	1	11	11	11	1350	144.934	9.18799
	Afu1g04620	Afu1g04620 AspGDID:ASPL0000101631 COORDS:Chr1_A_fumigatus_Af293:1309293-1307958C, translated using codon table 1 (348 amino acids) Uncharacterized ORF; Putative zinc-containing alcohol dehydrogenase; reacts with rabbit immunosera exposed to A. fumigatus conidia; hypoxia induced protein; transcript up-regulated in conidia exposed to neutrophils; repressed by gliotoxin exposure	38.3361	40.23	1	10	10	11	348	37.8294	6.63916
	Afu1g06710	Afu1g06710 AspGDID:ASPL0000101839 COORDS:Chr1_A_fumigatus_Af293:1922660-1920607C, translated using codon table 1 (564 amino acids) Uncharacterized ORF; Ortholog(s) have chaperonin-containing T-complex, nucleus localization	38.3232	27.84	1	11	11	12	564	60.9935	6.34131
	Afu2g09790	Afu2g09790 AspGDID:ASPL0000103695 COORDS:Chr2_A_fumigatus_Af293:2503042-2501287C, translated using codon table 1 (553 amino acids) Uncharacterized ORF; Putative glucose-6-phosphate isomerase	38.0742	26.58	1	10	10	12	553	61.2771	6.354
	Afu5g04230	cit1 AspGDID:ASPL0000107602 COORDS:Chr5_A_fumigatus_Af293:1129170-1127276C, translated using codon table 1 (474 amino acids) Verified ORF; Putative citrate synthase; reacts with rabbit immunosera exposed to A. fumigatus conidia; transcript induced by exposure to human airway epithelial cells	37.7996	29.96	1	11	11	11	474	52.0791	8.57275
	Afu2g16090	Afu2g16090 AspGDID:ASPL0000104326 COORDS:Chr2_A_fumigatus_Af293:4262510-4260510C, translated using codon table 1 (552 amino acids) Uncharacterized ORF; Karyopherin alpha subunit	37.653	21.2	1	8	8	10	552	60.6459	5.07178
	Afu2g10270	tor AspGDID:ASPL0000103742 COORDS:Chr2_A_fumigatus_Af293:2631516-2624171C, translated using codon table 1 (2384 amino acids) Uncharacterized ORF; Tor kinase, involved in regulation cell wall biosynthesis and nutrient sensing	37.4506	5.91	1	10	10	11	2384	269.413	6.90283
	Afu2g10300	Afu2g10300 AspGDID:ASPL0000103745 COORDS:Chr2_A_fumigatus_Af293:2636570-2637526W, translated using codon table 1 (198 amino acids) Uncharacterized ORF; 40S ribosomal protein S17	36.778	36.87	1	6	6	9	198	22.6521	9.99365
	Afu3g06310	Afu3g06310 AspGDID:ASPL0000105042 COORDS:Chr3_A_fumigatus_Af293:1564974-1563861C, translated using codon table 1 (326 amino acids) Uncharacterized ORF; Has domain(s) with predicted nucleic acid binding, nucleotide binding activity	36.3749	19.63	1	6	6	8	326	37.8535	9.27588
	Afu1g09440	rps23 AspGDID:ASPL0000102010 COORDS:Chr1_A_fumigatus_Af293:2441556-2442180W, translated using codon table 1 (145 amino acids) Uncharacterized ORF; 40S ribosomal protein S23	36.1584	42.76	1	5	5	9	145	15.8908	10.4478
	Afu3g11690	Afu3g11690 AspGDID:ASPL0000105565 COORDS:Chr3_A_fumigatus_Af293:3071255-3069978C, translated using codon table 1 (360 amino acids) Uncharacterized ORF; Putative class II fructose-bisphosphate aldolase; immunoreactive protein; reacts with rabbit immunosera exposed to A. fumigatus conidia; hypoxia induced protein	35.5958	26.39	1	7	7	9	360	39.7659	5.84619
	Afu1g15270	Afu1g15270 AspGDID:ASPL0000102593 COORDS:Chr1_A_fumigatus_Af293:4111044-4114037W, translated using codon table 1 (997 amino acids) Uncharacterized ORF; Ortholog(s) have cytosol, nuclear envelope localization	35.5541	11.13	1	9	9	9	997	111.028	5.70654
	Afu3g05430	Afu3g05430 AspGDID:ASPL0000104959 COORDS:Chr3_A_fumigatus_Af293:1307445-1305739C, translated using codon table 1 (507 amino acids) Uncharacterized ORF; Ortholog(s) have translation regulator activity, nucleic acid binding activity	35.4614	25.84	1	11	11	11	507	57.0894	8.82178
	Afu1g17000	Afu1g17000 AspGDID:ASPL0000102765 COORDS:Chr1_A_fumigatus_Af293:4639817-4640623W, translated using codon table 1 (268 amino acids) Uncharacterized ORF; Ortholog of <i>A. nidulans FGSC A4</i> : AN0631, <i>A. niger CBS 513.88</i> : An01g09850, <i>A. oryzae RIB40</i> : AO090005000975, <i>Aspergillus wentii</i> : Aspwe1_0068188 and <i>Aspergillus sydowii</i> : Aspsy1_0041402	35.4569	47.01	1	7	7	8	268	28.6926	9.67139
	Afu5g02160	Afu5g02160 AspGDID:ASPL0000107396 COORDS:Chr5_A_fumigatus_Af293:552208-549993C, translated using codon table 1 (613 amino acids) Uncharacterized ORF; Ortholog(s) have nucleolus localization	34.9322	17.62	1	7	7	9	613	65.768	7.34229
	Afu1g04190	pab1 AspGDID:ASPL0000101587 COORDS:Chr1_A_fumigatus_Af293:1197903-1195508C, translated using codon table 1 (753 amino acids) Uncharacterized ORF; Putative polyadenylate-binding protein	34.8774	19.26	1	11	11	11	753	81.3943	5.94775
	Afu2g16050	Afu2g16050 AspGDID:ASPL0000104322 COORDS:Chr2_A_fumigatus_Af293:4250153-4249088C, translated using codon table 1 (337 amino acids) Uncharacterized ORF; Ortholog of <i>A. nidulans FGSC A4</i> : AN2146, <i>A. niger CBS 513.88</i> : An15g06400, <i>A. oryzae RIB40</i> : AO090012000196, <i>Aspergillus wentii</i> : Aspwe1_0170996 and <i>Aspergillus sydowii</i> : Aspsy1_0085010	34.8179	29.97	1	9	9	10	337	38.0474	10.1401
	Afu1g09770	Afu1g09770 AspGDID:ASPL0000102043 COORDS:Chr1_A_fumigatus_Af293:2532708-2535258W, translated using codon table 1 (786 amino acids) Uncharacterized ORF; Ortholog of <i>A. nidulans FGSC A4</i> : AN1288, <i>A. niger CBS 513.88</i> : An08g01580, <i>A. oryzae RIB40</i> : AO090012000866, <i>Aspergillus wentii</i> : Aspwe1_0036503 and <i>Aspergillus sydowii</i> : Aspsy1_0025457	34.477	16.41	1	9	9	10	786	83.6754	9.45166
	Afu5g10780	uge5 AspGDID:ASPL0000108140 COORDS:Chr5_A_fumigatus_Af293:2756278-2757615W, translated using codon table 1 (371 amino acids) Verified ORF; UDP-glucose 4-epimerase required for galactose metabolism; hypoxia induced protein	34.4118	28.03	1	7	7	9	371	40.5836	6.25244
	Afu3g11540	Afu3g11540 AspGDID:ASPL0000105552 COORDS:Chr3_A_fumigatus_Af293:3034245-3035231W, translated using codon table 1 (328 amino acids) Uncharacterized ORF; Ortholog of <i>A. nidulans FGSC A4</i> : AN2893/fhdA, <i>A. niger CBS 513.88</i> : An14g03210, <i>A. oryzae RIB40</i> : AO090003000711, <i>Neosartorya fischeri NRRL 181</i> : NFIA_065770 and <i>Aspergillus clavatus NRRL 1</i> : ACLA_039420	34.2372	29.27	1	7	7	9	328	38.0904	10.5796
	Afu3g10070	Afu3g10070 AspGDID:ASPL0000105404 COORDS:Chr3_A_fumigatus_Af293:2592726-2594405W, translated using codon table 1 (542 amino acids) Uncharacterized ORF; Ortholog(s) have nucleus localization	33.6191	21.59	1	7	7	8	542	60.2089	7.86963
	Afu2g03380	Afu2g03380 AspGDID:ASPL0000103167 COORDS:Chr2_A_fumigatus_Af293:892615-891880C, translated using codon table 1 (127 amino acids) Uncharacterized ORF; Ortholog(s) have cytosol, mitochondrion, nucleus localization	32.7956	48.82	1	6	6	9	127	13.429	9.67139
	Afu6g13490	Afu6g13490 AspGDID:ASPL0000109690 COORDS:Chr6_A_fumigatus_Af293:3433612-3431912C, translated using codon table 1 (515 amino acids) Uncharacterized ORF; Putative glutamate decarboxylase; predicted gene pair with AFUA_8G06020; SrbA-regulated during hypoxia	32.637	24.47	1	9	9	9	515	58.8806	6.23975
	Afu1g04940	Afu1g04940 AspGDID:ASPL0000101663 COORDS:Chr1_A_fumigatus_Af293:1408563-1409639W, translated using codon table 1 (189 amino acids) Uncharacterized ORF; Ortholog(s) have GTP binding, GTPase activity	32.5625	48.68	1	7	7	9	189	21.4181	6.41748
	Afu4g08240	Afu4g08240 AspGDID:ASPL0000106538 COORDS:Chr4_A_fumigatus_Af293:2135925-2137164W, translated using codon table 1 (347 amino acids) Verified ORF; Putative zinc-containing alcohol dehydrogenase; conidia-enriched protein; transcript up-regulated in conidia exposed to neutrophils	32.5346	34.01	1	7	7	8	347	37.4063	7.09326
	Afu1g09100	Afu1g09100 AspGDID:ASPL0000101976 COORDS:Chr1_A_fumigatus_Af293:2363153-2364329W, translated using codon table 1 (192 amino acids) Uncharacterized ORF; 60S ribosomal protein L9	32.2215	48.96	1	8	8	9	192	21.8297	9.67139
	Afu2g08940	Afu2g08940 AspGDID:ASPL0000103612 COORDS:Chr2_A_fumigatus_Af293:2296391-2298108W, translated using codon table 1 (549 amino acids) Uncharacterized ORF; Ortholog of <i>A. nidulans FGSC A4</i> : AN6065, <i>A. niger CBS 513.88</i> : An12g04650, <i>A. oryzae RIB40</i> : AO090011000801, <i>Aspergillus wentii</i> : Aspwe1_0176156 and <i>Aspergillus sydowii</i> : Aspsy1_0031398	32.0559	21.86	1	8	8	9	549	59.2786	7.41553
	Afu1g12120	Afu1g12120 AspGDID:ASPL0000102278 COORDS:Chr1_A_fumigatus_Af293:3205498-3207930W, translated using codon table 1 (789 amino acids) Uncharacterized ORF; Ortholog of <i>A. niger CBS 513.88</i> : An08g04420, <i>A. oryzae RIB40</i> : AO090001000333, <i>Aspergillus wentii</i> : Aspwe1_0027928, <i>Aspergillus sydowii</i> : Aspsy1_0038224 and <i>Aspergillus terreus NIH2624</i> : ATET_00411	31.627	13.43	1	9	10	11	789	95.9883	10.5356
	Afu4g11660	Afu4g11660 AspGDID:ASPL0000106874 COORDS:Chr4_A_fumigatus_Af293:3083851-3086019W, translated using codon table 1 (647 amino acids) Uncharacterized ORF; Ortholog(s) have methylated histone binding activity	31.6117	19.17	1	9	9	9	647	69.0783	9.5249
	Afu6g03820	egd2 AspGDID:ASPL0000108837 COORDS:Chr6_A_fumigatus_Af293:841323-840546C, translated using codon table 1 (204 amino acids) Uncharacterized ORF; Nascent polypeptide-associated complex subunit alpha; predicted role in 'de novo' cotranslational protein folding; enriched in dormant conidia	31.5334	47.06	1	5	5	6	204	21.959	4.94482
	Afu2g03610	Afu2g03610 AspGDID:ASPL0000103188 COORDS:Chr2_A_fumigatus_Af293:961023-959122C, translated using codon table 1 (546 amino acids) Uncharacterized ORF; Putative inosine 5'-monophosphate (IMP) dehydrogenase; reacts with rabbit immunosera exposed to A. fumigatus conidia; transcript induced by exposure to human airway epithelial cells; snoRNA Afu-210 encoded within intron 2	31.35	23.44	1	8	8	8	546	57.9218	6.72705
	Afu6g13120	Afu6g13120 AspGDID:ASPL0000109654 COORDS:Chr6_A_fumigatus_Af293:3319421-3313341C, translated using codon table 1 (2009 amino acids) Uncharacterized ORF; Ortholog(s) have ribonucleoprotein complex binding activity	31.3145	7.91	1	11	11	11	2009	224.189	5.41455
	Afu3g13320	rps0 AspGDID:ASPL0000105727 COORDS:Chr3_A_fumigatus_Af293:3533778-3534743W, translated using codon table 1 (297 amino acids) Uncharacterized ORF; Putative 40S ribosomal protein S0	31.3039	35.02	1	7	7	8	297	32.1022	4.90674
	Afu2g10330	Afu2g10330 AspGDID:ASPL0000103748 COORDS:Chr2_A_fumigatus_Af293:2644267-2645677W, translated using codon table 1 (447 amino acids) Uncharacterized ORF; Ortholog of <i>A. nidulans FGSC A4</i> : AN5949, <i>A. niger CBS 513.88</i> : An16g04660, <i>A. oryzae RIB40</i> : AO090011000605, <i>Aspergillus wentii</i> : Aspwe1_0175384 and <i>Aspergillus sydowii</i> : Aspsy1_0089318	31.2055	19.91	1	7	7	9	447	54.2211	9.86182
	Afu2g02100	Afu2g02100 AspGDID:ASPL0000103040 COORDS:Chr2_A_fumigatus_Af293:523316-521496C, translated using codon table 1 (513 amino acids) Uncharacterized ORF; Putative dihydrolipoamide dehydrogenase; reacts with rabbit immunosera exposed to A. fumigatus conidia	31.193	25.15	1	9	9	9	513	54.9366	8.17725
	Afu2g06150	pdiA AspGDID:ASPL0000103438 COORDS:Chr2_A_fumigatus_Af293:1746610-1744786C, translated using codon table 1 (517 amino acids) Verified ORF; Putative protein disulfide isomerase; conidial surface associated	31.0125	23.79	1	9	9	9	517	56.152	4.70361
	Afu3g06970	Afu3g06970 AspGDID:ASPL0000105108 COORDS:Chr3_A_fumigatus_Af293:1743190-1744103W, translated using codon table 1 (193 amino acids) Uncharacterized ORF; 40S ribosomal protein S9; transcript induced by exposure to human airway epithelial cells	30.966	47.15	1	10	10	10	193	22.1891	10.0522
	Afu4g09140	car2 AspGDID:ASPL0000106629 COORDS:Chr4_A_fumigatus_Af293:2388283-2389697W, translated using codon table 1 (450 amino acids) Uncharacterized ORF; L-ornithine aminotransferase; induced by growth on BSA as a sole nitrogen source; SrbA-regulated during hypoxia	30.9116	28.89	1	9	9	9	450	49.0863	6.53662
	Afu2g08360	pyrG AspGDID:ASPL0000103555 COORDS:Chr2_A_fumigatus_Af293:2153922-2153018C, translated using codon table 1 (278 amino acids) Verified ORF; Orotidine 5'-monophosphate decarboxylase	30.8873	35.25	1	8	8	9	278	30.2485	6.69775
	Afu1g11130	Afu1g11130 AspGDID:ASPL0000102176 COORDS:Chr1_A_fumigatus_Af293:2932858-2933809W, translated using codon table 1 (200 amino acids) Uncharacterized ORF; 60S ribosomal protein L6	30.6991	31.5	1	5	5	8	200	22.4393	10.1548
	Afu3g10730	Afu3g10730 AspGDID:ASPL0000105471 COORDS:Chr3_A_fumigatus_Af293:2781133-2780135C, translated using codon table 1 (201 amino acids) Uncharacterized ORF; 40S ribosomal protein S7e	30.334	44.28	1	5	5	6	201	22.8304	10.1548
	Afu5g04330	Afu5g04330 AspGDID:ASPL0000107612 COORDS:Chr5_A_fumigatus_Af293:1164058-1160457C, translated using codon table 1 (967 amino acids) Verified ORF; Putative aminopeptidase; conidia-enriched protein; protein induced by heat shock; repressed by gliotoxin exposure	30.1123	13.24	1	9	9	10	967	108.639	6.7124
	Afu1g15730	Afu1g15730 AspGDID:ASPL0000102636 COORDS:Chr1_A_fumigatus_Af293:4254406-4255080W, translated using codon table 1 (130 amino acids) Uncharacterized ORF; 40S ribosomal protein S22	30.0922	60.77	1	6	6	8	130	14.6648	9.65674
	Afu1g06090	Afu1g06090 AspGDID:ASPL0000101777 COORDS:Chr1_A_fumigatus_Af293:1762917-1764722W, translated using codon table 1 (559 amino acids) Uncharacterized ORF; Ortholog(s) have role in apical protein localization, regulation of cell shape and cell septum, plasma membrane of cell tip, spitzenkorper localization	29.7397	15.21	1	6	6	6	559	61.3761	8.98291
	Afu5g05630	Afu5g05630 AspGDID:ASPL0000107640 COORDS:Chr5_A_fumigatus_Af293:1313445-1312542C, translated using codon table 1 (154 amino acids) Uncharacterized ORF; 60S ribosomal protein L23	29.7315	50.65	1	8	8	9	154	17.0726	10.3306
	Afu4g03860	nip1 AspGDID:ASPL0000106205 COORDS:Chr4_A_fumigatus_Af293:1086172-1088854W, translated using codon table 1 (862 amino acids) Uncharacterized ORF; Eukaryotic translation initiation factor 3 subunit C	29.7155	13.23	1	8	8	9	862	97.4481	5.13525
	Afu1g08767	Afu1g08767 AspGDID:ASPL0000421458 COORDS:Chr1_A_fumigatus_Af293:2255824-2253657C, translated using codon table 1 (694 amino acids) Uncharacterized ORF; Ortholog(s) have role in sporocarp development involved in sexual reproduction	29.5129	18.44	1	9	9	10	694	76.0992	7.23975
	Afu1g03970	Afu1g03970 AspGDID:ASPL0000101567 COORDS:Chr1_A_fumigatus_Af293:1147911-1144571C, translated using codon table 1 (1068 amino acids) Verified ORF; Putative mitochondrial translation initiation factor IF-2	29.2542	11.61	1	7	7	7	1068	118.635	6.13818
	Afu1g04320	Afu1g04320 AspGDID:ASPL0000101600 COORDS:Chr1_A_fumigatus_Af293:1226288-1226942W, translated using codon table 1 (201 amino acids) Uncharacterized ORF; Ribosomal protein S8	29.1169	35.32	1	5	5	7	201	22.7982	11.1802
	Afu1g11710	Afu1g11710 AspGDID:ASPL0000102235 COORDS:Chr1_A_fumigatus_Af293:3080890-3079981C, translated using codon table 1 (217 amino acids) Uncharacterized ORF; Ribosomal protein L1	28.7435	29.95	1	5	5	7	217	24.2372	9.86182
	Afu2g16820	Afu2g16820 AspGDID:ASPL0000104401 COORDS:Chr2_A_fumigatus_Af293:4493020-4491357C, translated using codon table 1 (405 amino acids) Uncharacterized ORF; Putative curved DNA-binding protein	28.6258	32.59	1	8	8	8	405	44.0373	7.73779
	Afu6g08520	acyA AspGDID:ASPL0000109208 COORDS:Chr6_A_fumigatus_Af293:2004175-2011149W, translated using codon table 1 (2159 amino acids) Uncharacterized ORF; Adenylate cyclase of the cAMP-dependent signaling pathway, involved in regulation of proliferation and conidiophore development	28.5312	5.84	1	9	9	9	2159	238.637	7.85498
	Afu2g04670	Afu2g04670 AspGDID:ASPL0000103293 COORDS:Chr2_A_fumigatus_Af293:1271655-1269395C, translated using codon table 1 (603 amino acids) Uncharacterized ORF; Ortholog(s) have role in ascospore-type prospore assembly, protein targeting to vacuole involved in ubiquitin-dependent protein catabolic process via the multivesicular body sorting pathway	28.3715	21.06	1	8	8	9	603	66.7521	6.1001
	Afu4g07710	Afu4g07710 AspGDID:ASPL0000106486 COORDS:Chr4_A_fumigatus_Af293:2014380-2018024W, translated using codon table 1 (1193 amino acids) Uncharacterized ORF; Putative pyruvate carboxylase; protein induced by heat shock	28.1552	9.72	1	9	9	9	1193	131.191	6.69775
	Afu2g16010	Afu2g16010 AspGDID:ASPL0000104318 COORDS:Chr2_A_fumigatus_Af293:4237529-4235525C, translated using codon table 1 (601 amino acids) Uncharacterized ORF; Prolyl-tRNA synthetase	28.1449	19.97	1	8	8	8	601	66.9952	7.1665
	Afu5g02470	nmt1 AspGDID:ASPL0000107427 COORDS:Chr5_A_fumigatus_Af293:638154-636920C, translated using codon table 1 (342 amino acids) Uncharacterized ORF; Thiamine biosynthesis protein, phoB-regulated; protein induced by H2O2; reacts with rabbit immunosera exposed to conidia; hypoxia induced protein; transcript induced by exposure to human airway epithelial cells; induced by gliotoxin	28.0968	27.19	1	6	6	7	342	38.2984	6.44287
	Afu3g12300	Afu3g12300 AspGDID:ASPL0000105626 COORDS:Chr3_A_fumigatus_Af293:3242604-3243283W, translated using codon table 1 (124 amino acids) Uncharacterized ORF; 60S ribosomal protein L22	27.8856	52.42	1	6	6	8	124	14.1826	9.40771
	Afu3g05600	Afu3g05600 AspGDID:ASPL0000104976 COORDS:Chr3_A_fumigatus_Af293:1361310-1362104W, translated using codon table 1 (149 amino acids) Uncharacterized ORF; 60S ribosomal protein L27a	27.8793	39.6	1	6	6	8	149	16.751	10.4331
	Afu4g07690	Afu4g07690 AspGDID:ASPL0000106484 COORDS:Chr4_A_fumigatus_Af293:2001294-2003380W, translated using codon table 1 (595 amino acids) Uncharacterized ORF; Putative phosphoribosylaminoimidazole-carboxamide formyltransferase/IMP cyclohydrolase; hypoxia repressed protein	27.8636	20.84	1	10	10	10	595	64.9875	6.85889
	Afu5g08540	aspA AspGDID:ASPL0000107925 COORDS:Chr5_A_fumigatus_Af293:2167838-2169399W, translated using codon table 1 (382 amino acids) Verified ORF; Septin; hypoxia repressed protein; repressed by exposure to artemisinin	27.8401	30.63	1	9	9	10	382	43.2901	5.13525
	Afu4g04460	Afu4g04460 AspGDID:ASPL0000106264 COORDS:Chr4_A_fumigatus_Af293:1261402-1262578W, translated using codon table 1 (226 amino acids) Uncharacterized ORF; 60S ribosomal protein L13	27.766	35.84	1	9	9	10	226	25.6361	10.6528
	Afu1g05080	Afu1g05080 AspGDID:ASPL0000101677 COORDS:Chr1_A_fumigatus_Af293:1454060-1455134W, translated using codon table 1 (313 amino acids) Uncharacterized ORF; Putative 60S ribosomal protein P0; reacts with rabbit immunosera exposed to A. fumigatus conidia	27.5571	34.5	1	7	7	7	313	33.4742	5.21143
	Afu6g06900	rho1 AspGDID:ASPL0000109052 COORDS:Chr6_A_fumigatus_Af293:1523942-1524891W, translated using codon table 1 (193 amino acids) Verified ORF; Putative Rho-type GTPase; predominantly localize to the hyphal tip; involved in radial growth and conidiation; mutants display cytoplasmic leakage at the hyphal tips	27.4474	37.31	1	6	6	8	193	21.6873	6.771
	Afu7g01800	Afu7g01800 AspGDID:ASPL0000109975 COORDS:Chr7_A_fumigatus_Af293:477654-480419W, translated using codon table 1 (921 amino acids) Uncharacterized ORF; Has domain(s) with predicted DNA binding activity	27.405	12.81	1	5	5	5	921	99.9897	10.3306
	Afu1g05200	tif32 AspGDID:ASPL0000101689 COORDS:Chr1_A_fumigatus_Af293:1488654-1485294C, translated using codon table 1 (1051 amino acids) Uncharacterized ORF; Eukaryotic translation initiation factor 3 subunit A	27.324	13.89	1	9	9	9	1051	120.156	9.39307
	Afu5g07240	Afu5g07240 AspGDID:ASPL0000107798 COORDS:Chr5_A_fumigatus_Af293:1801377-1803320W, translated using codon table 1 (647 amino acids) Uncharacterized ORF; Has domain(s) with predicted nucleic acid binding activity	27.1973	18.7	1	9	9	9	647	71.0997	5.35107
	Afu2g10500	Afu2g10500 AspGDID:ASPL0000103765 COORDS:Chr2_A_fumigatus_Af293:2687569-2686778C, translated using codon table 1 (143 amino acids) Uncharacterized ORF; 40S ribosomal protein Rps16	26.9761	39.86	1	5	5	8	143	15.9616	10.1841
	Afu2g07970	Afu2g07970 AspGDID:ASPL0000103517 COORDS:Chr2_A_fumigatus_Af293:2047985-2048981W, translated using codon table 1 (191 amino acids) Uncharacterized ORF; 60S ribosomal protein L19	26.7804	34.55	1	7	7	8	191	22.5655	11.561
	Afu6g13550	Afu6g13550 AspGDID:ASPL0000109696 COORDS:Chr6_A_fumigatus_Af293:3450087-3449278C, translated using codon table 1 (155 amino acids) Uncharacterized ORF; Ribosomal protein S13p/S18e	26.7787	45.16	1	9	9	9	155	17.8567	10.4478
	Afu4g13690	Afu4g13690 AspGDID:ASPL0000107075 COORDS:Chr4_A_fumigatus_Af293:3585762-3584862C, translated using codon table 1 (202 amino acids) Uncharacterized ORF; Has domain(s) with predicted pseudouridine synthase activity, snoRNA binding activity, role in pseudouridine synthesis, ribosome biogenesis, snRNA pseudouridine synthesis and box H/ACA snoRNP complex localization	26.5665	21.78	1	2	2	4	202	20.3925	11.2388
	Afu5g12180	Afu5g12180 AspGDID:ASPL0000108274 COORDS:Chr5_A_fumigatus_Af293:3157322-3158399W, translated using codon table 1 (247 amino acids) Uncharacterized ORF; Ortholog(s) have Ran GTPase binding activity and role in G1/S transition of mitotic cell cycle, RNA export from nucleus, Ran protein signal transduction, protein import into nucleus, ubiquitin-dependent protein catabolic process	26.5391	48.18	1	7	7	7	247	27.6266	4.98291
	Afu5g03080	aspC AspGDID:ASPL0000107487 COORDS:Chr5_A_fumigatus_Af293:834771-833226C, translated using codon table 1 (384 amino acids) Uncharacterized ORF; Putative septin; hypoxia repressed protein; repressed by exposure to artemisinin	26.3713	20.57	1	5	6	7	384	44.387	8.73389
	Afu7g05290	Afu7g05290 AspGDID:ASPL0000110222 COORDS:Chr7_A_fumigatus_Af293:1257190-1256242C, translated using codon table 1 (151 amino acids) Uncharacterized ORF; Cytosolic small ribosomal subunit S13/S15; transcript repressed by exposure to human airway epithelial cells	25.6752	39.07	1	6	6	8	151	16.8353	10.4331
	Afu4g06910	Afu4g06910 AspGDID:ASPL0000106405 COORDS:Chr4_A_fumigatus_Af293:1790067-1791391W, translated using codon table 1 (284 amino acids) Uncharacterized ORF; Putative outer mitochondrial membrane protein porin; hypoxia induced protein	25.5242	35.92	1	4	4	4	284	30.0075	8.99756
	Afu5g13510	Afu5g13510 AspGDID:ASPL0000108404 COORDS:Chr5_A_fumigatus_Af293:3546669-3545011C, translated using codon table 1 (476 amino acids) Uncharacterized ORF; Ortholog(s) have Prp19 complex, cytosol, nuclear envelope localization	25.3369	20.38	1	4	4	4	476	50.1476	5.19873
	Afu2g11060	Afu2g11060 AspGDID:ASPL0000103821 COORDS:Chr2_A_fumigatus_Af293:2836626-2837531W, translated using codon table 1 (158 amino acids) Uncharacterized ORF; Putative acylCoA binding family protein	25.0841	45.57	1	5	5	6	158	17.2987	5.99854
	Afu1g12800	Afu1g12800 AspGDID:ASPL0000102348 COORDS:Chr1_A_fumigatus_Af293:3382593-3384187W, translated using codon table 1 (385 amino acids) Uncharacterized ORF; Putative NADPH isocitrate dehydrogenase; transcript induced during conidial germination	25.0377	21.56	1	6	6	7	385	41.7008	8.51416
	Afu2g09200	Afu2g09200 AspGDID:ASPL0000103638 COORDS:Chr2_A_fumigatus_Af293:2358357-2358900W, translated using codon table 1 (106 amino acids) Uncharacterized ORF; 60S ribosomal protein L30	25.0297	40.57	1	4	4	6	106	11.294	9.83252
	Afu1g13900	Afu1g13900 AspGDID:ASPL0000102458 COORDS:Chr1_A_fumigatus_Af293:3711604-3716855W, translated using codon table 1 (1680 amino acids) Uncharacterized ORF; Ortholog(s) have DNA-directed RNA polymerase activity, role in mRNA export from nucleus, nucleolus organization, protein localization to nucleolar rDNA repeats and DNA-directed RNA polymerase I complex, cytosol localization	24.9578	7.26	1	7	7	7	1680	186.49	7.03467
	Afu2g14990	Afu2g14990 AspGDID:ASPL0000104214 COORDS:Chr2_A_fumigatus_Af293:3948734-3946908C, translated using codon table 1 (451 amino acids) Uncharacterized ORF; Tubulin alpha-2 subunit; gene pair with AFUA_1G02550 (tubulin alpha-1 subunit)	24.4033	19.51	1	4	5	5	451	50.4098	5.16064
	Afu5g12910	Afu5g12910 AspGDID:ASPL0000108345 COORDS:Chr5_A_fumigatus_Af293:3387630-3388346W, translated using codon table 1 (115 amino acids) Uncharacterized ORF; Ortholog(s) have role in mRNA splicing, via spliceosome and U1 snRNP, U2 snRNP, U2-type prespliceosome, U4/U6 x U5 tri-snRNP complex, U5 snRNP localization	24.3199	50.43	1	4	4	5	115	13.0689	9.36377
	Afu1g03390	Afu1g03390 AspGDID:ASPL0000101509 COORDS:Chr1_A_fumigatus_Af293:988367-987625C, translated using codon table 1 (165 amino acids) Uncharacterized ORF; Putative 60S ribosomal protein L12	24.3126	43.64	1	5	5	6	165	17.9488	9.5542
	Afu6g07720	acuF AspGDID:ASPL0000109132 COORDS:Chr6_A_fumigatus_Af293:1757338-1754889C, translated using codon table 1 (601 amino acids) Uncharacterized ORF; Putative phosphoenolpyruvate carboxykinase; transcript up-regulated in conidia exposed to neutrophils; transcript downregulated in response to hypoxia	24.0097	16.81	1	7	7	7	601	66.6781	6.17627
	Afu5g05540	nap1 AspGDID:ASPL0000107632 COORDS:Chr5_A_fumigatus_Af293:1289638-1291216W, translated using codon table 1 (411 amino acids) Uncharacterized ORF; Putative nucleosome assembly protein	23.6681	19.71	1	6	6	7	411	46.7917	4.55127
	Afu2g13890	anxc3.2 AspGDID:ASPL0000104104 COORDS:Chr2_A_fumigatus_Af293:3627546-3626132C, translated using codon table 1 (446 amino acids) Uncharacterized ORF; Putative annexin; calcium induced	23.5042	19.51	1	7	7	7	446	49.3028	8.51416
	Afu3g11740	Afu3g11740 AspGDID:ASPL0000105570 COORDS:Chr3_A_fumigatus_Af293:3081634-3084443W, translated using codon table 1 (905 amino acids) Uncharacterized ORF; Ortholog(s) have role in anisotropic cell growth and cytoplasm, nucleus localization	23.4494	10.83	1	6	6	6	905	94.0716	6.81494
	Afu1g10220	Afu1g10220 AspGDID:ASPL0000102086 COORDS:Chr1_A_fumigatus_Af293:2633035-2630737C, translated using codon table 1 (736 amino acids) Uncharacterized ORF; Ortholog of <i>A. nidulans FGSC A4</i> : AN1250, <i>A. niger CBS 513.88</i> : An08g02090, <i>Neosartorya fischeri NRRL 181</i> : NFIA_015430 and <i>Aspergillus versicolor</i> : Aspve1_0119420	23.4068	10.05	1	5	5	5	736	83.2908	10.3452
	Afu3g11400	pep2 AspGDID:ASPL0000105538 COORDS:Chr3_A_fumigatus_Af293:2990626-2992029W, translated using codon table 1 (398 amino acids) Verified ORF; Aspartic acid endopeptidase; conidia-enriched protein; conidial surface associated; predicted signal secretion sequence; hypoxia induced protein; transcript up-regulated in conidia exposed to neutrophils and by growth on BSA	23.403	21.86	1	5	5	6	398	43.3277	4.99561
	Afu3g09290	Afu3g09290 AspGDID:ASPL0000105327 COORDS:Chr3_A_fumigatus_Af293:2357229-2355494C, translated using codon table 1 (520 amino acids) Verified ORF; Putative 2,3-bisphosphoglycerate-independent phosphoglycerate mutase; protein abundant in conidia; reacts with rabbit immunosera exposed to A. fumigatus conidia; transcript induced by exposure to human airway epithelial cells	23.3304	9.04	1	3	3	5	520	57.418	5.66846
	Afu5g04210	Afu5g04210 AspGDID:ASPL0000107600 COORDS:Chr5_A_fumigatus_Af293:1122054-1123659W, translated using codon table 1 (460 amino acids) Uncharacterized ORF; Putative ubiquinol-cytochrome C reductase complex core protein 2; hypoxia induced protein	23.2355	15.43	1	5	5	6	460	48.06	8.90967
	Afu3g07430	aspf27 AspGDID:ASPL0000105151 COORDS:Chr3_A_fumigatus_Af293:1867882-1867179C, translated using codon table 1 (163 amino acids) Verified ORF; Putative peptidyl-prolyl cis-trans isomerase; cyclophilin; allergen Asp f 27; protein abundant in conidia; Yap1-dependent induction in response to hydrogen peroxide; induced by L-tyrosine	22.9346	30.67	1	5	5	7	163	17.7299	7.97217
	Afu5g09330	cipC AspGDID:ASPL0000108002 COORDS:Chr5_A_fumigatus_Af293:2402867-2402275C, translated using codon table 1 (130 amino acids) Verified ORF; CipC-like, hyphal-specific protein; not concanamycin A or stress induced as it is in A. nidulans; reacts with rabbit immunosera exposed to A. fumigatus conidia	22.8881	54.62	1	6	6	7	130	15.0433	6.26514
	Afu2g15500	Afu2g15500 AspGDID:ASPL0000104267 COORDS:Chr2_A_fumigatus_Af293:4090212-4089707C, translated using codon table 1 (88 amino acids) Uncharacterized ORF; Ortholog(s) have role in mRNA splicing, via spliceosome and U1 snRNP, U2 snRNP, U4/U6 x U5 tri-snRNP complex, U5 snRNP, cytosol localization	22.8218	56.82	1	6	6	7	88	9.99915	5.40186
	Afu4g10200	rfeF AspGDID:ASPL0000106734 COORDS:Chr4_A_fumigatus_Af293:2660389-2663660W, translated using codon table 1 (706 amino acids) Uncharacterized ORF; Putative transcription factor; calcium induced	22.8032	13.31	1	6	6	6	706	75.0871	5.03369
	Afu6g13300	Afu6g13300 AspGDID:ASPL0000109671 COORDS:Chr6_A_fumigatus_Af293:3377042-3376007C, translated using codon table 1 (215 amino acids) Uncharacterized ORF; GTP-Binding nuclear protein Ran	22.8007	35.81	1	5	5	6	215	24.0624	7.38623
	Afu5g03560	Afu5g03560 AspGDID:ASPL0000107534 COORDS:Chr5_A_fumigatus_Af293:963324-960949C, translated using codon table 1 (715 amino acids) Uncharacterized ORF; Putative glutamyl-tRNA synthetase; transcript induced by exposure to human airway epithelial cells	22.7776	16.22	1	7	7	7	715	81.3732	7.53271
	Afu5g08090	pyroA AspGDID:ASPL0000107881 COORDS:Chr5_A_fumigatus_Af293:2051048-2050001C, translated using codon table 1 (308 amino acids) Uncharacterized ORF; Putative pyridoxine biosynthesis protein	22.638	31.17	1	6	6	6	308	32.7158	6.43018
	Afu4g11720	Afu4g11720 AspGDID:ASPL0000106880 COORDS:Chr4_A_fumigatus_Af293:3100984-3098931C, translated using codon table 1 (613 amino acids) Uncharacterized ORF; Putative phosphatidyl synthase; protein levels increase in response to pkaC overexpression	22.5616	18.76	1	10	10	10	613	67.0703	6.55127
	Afu4g08580	prx1 AspGDID:ASPL0000106571 COORDS:Chr4_A_fumigatus_Af293:2220262-2219313C, translated using codon table 1 (222 amino acids) Uncharacterized ORF; Mitochondrial peroxiredoxin; predicted role in cell redox homeostasis regulation; protein levels increase with amphotericin B and H2O2 exposure; transcript up-regulated in conidia exposed to neutrophils; repressed by gliotoxin exposure	22.4638	38.29	1	7	7	7	222	24.5287	6.13818
	Afu1g06830	rpp1 AspGDID:ASPL0000101851 COORDS:Chr1_A_fumigatus_Af293:1948201-1948863W, translated using codon table 1 (111 amino acids) Uncharacterized ORF; Putative 60s acidic ribosomal protein superfamily member; putative ribosomal stalk protein	22.4635	53.15	1	3	3	4	111	11.1215	4.17041
	Afu6g07430	Afu6g07430 AspGDID:ASPL0000109105 COORDS:Chr6_A_fumigatus_Af293:1677465-1679554W, translated using codon table 1 (527 amino acids) Uncharacterized ORF; Putative pyruvate kinase; reacts with rabbit immunosera exposed to A. fumigatus conidia	22.3684	16.7	1	6	6	7	527	58.348	7.03467
	Afu4g04502	Afu4g04502 AspGDID:ASPL0000364671 COORDS:Chr4_A_fumigatus_Af293:1270567-1268450C, translated using codon table 1 (583 amino acids) Uncharacterized ORF; Ortholog(s) have role in conidium formation, response to heat	22.322	11.32	1	5	5	6	583	63.6845	9.01221
	Afu2g03030	prp8 AspGDID:ASPL0000103132 COORDS:Chr2_A_fumigatus_Af293:787177-777614C, translated using codon table 1 (3170 amino acids) Verified ORF; Putative pre-mRNA splicing factor; intein-containing protein, inteins are protein intervening sequences that can self-excise through protein splicing	22.2913	3.47	1	11	11	11	3170	364.449	8.06006
	Afu3g10050	Afu3g10050 AspGDID:ASPL0000105402 COORDS:Chr3_A_fumigatus_Af293:2587774-2586046C, translated using codon table 1 (557 amino acids) Uncharacterized ORF; Ortholog of <i>A. nidulans FGSC A4</i> : AN4983, <i>A. niger CBS 513.88</i> : An16g03800, <i>A. oryzae RIB40</i> : AO090003000538, <i>Aspergillus wentii</i> : Aspwe1_0168992 and <i>Aspergillus sydowii</i> : Aspsy1_0042898	22.2672	17.77	1	6	6	6	557	63.1825	6.52197
	Afu4g10240	Afu4g10240 AspGDID:ASPL0000106738 COORDS:Chr4_A_fumigatus_Af293:2679454-2679977W, translated using codon table 1 (116 amino acids) Uncharacterized ORF; Ortholog(s) have mRNA binding activity and role in cellular response to nitrogen starvation, mRNA splicing, via spliceosome, negative regulation of G0 to G1 transition	22.2212	43.1	1	4	4	5	116	12.831	11.312
	Afu6g08820	Afu6g08820 AspGDID:ASPL0000109238 COORDS:Chr6_A_fumigatus_Af293:2089238-2095101W, translated using codon table 1 (1545 amino acids) Uncharacterized ORF; Has domain(s) with predicted nucleic acid binding, nucleotide binding, zinc ion binding activity	22.2192	5.5	1	7	7	7	1545	165.867	8.5874
	Afu6g04200	Afu6g04200 AspGDID:ASPL0000108874 COORDS:Chr6_A_fumigatus_Af293:942450-943197W, translated using codon table 1 (228 amino acids) Uncharacterized ORF; Ortholog(s) have nucleus localization	22.216	18.42	1	3	3	5	228	27.3127	11.2827
	Afu5g07120	Afu5g07120 AspGDID:ASPL0000107787 COORDS:Chr5_A_fumigatus_Af293:1769812-1771261W, translated using codon table 1 (352 amino acids) Uncharacterized ORF; RNP domain protein; reacts with rabbit immunosera exposed to A. fumigatus conidia	22.2062	24.43	1	4	4	4	352	37.116	9.15869
	Afu4g03880	Afu4g03880 AspGDID:ASPL0000106207 COORDS:Chr4_A_fumigatus_Af293:1090760-1092367W, translated using codon table 1 (251 amino acids) Uncharacterized ORF; 60S ribosomal protein L7	22.1531	33.07	1	7	7	7	251	29.0066	10.0376
	Afu2g04130	Afu2g04130 AspGDID:ASPL0000103239 COORDS:Chr2_A_fumigatus_Af293:1132624-1131702C, translated using codon table 1 (160 amino acids) Uncharacterized ORF; 40S ribosomal protein S11	22.0588	41.88	1	6	6	7	160	18.5551	10.8286
	Afu5g02450	erg20 AspGDID:ASPL0000107425 COORDS:Chr5_A_fumigatus_Af293:631975-633093W, translated using codon table 1 (347 amino acids) Uncharacterized ORF; Putative polyprenyl synthetase; farnesyl-pyrophosphate synthetase; SrbA-regulated during hypoxia	21.9551	23.05	1	7	7	7	347	39.7375	5.50342
	Afu5g07790	Afu5g07790 AspGDID:ASPL0000107851 COORDS:Chr5_A_fumigatus_Af293:1949292-1945769C, translated using codon table 1 (1117 amino acids) Uncharacterized ORF; Ortholog(s) have role in cytoplasmic mRNA processing body assembly, deadenylation-independent decapping of nuclear-transcribed mRNA, mRNA 3'-end processing	21.9503	7.52	1	5	5	6	1117	123.397	8.57275
	Afu3g04170	Afu3g04170 AspGDID:ASPL0000104933 COORDS:Chr3_A_fumigatus_Af293:1175521-1176878W, translated using codon table 1 (377 amino acids) Uncharacterized ORF; Ortholog(s) have pyruvate dehydrogenase (acetyl-transferring) activity and role in acetyl-CoA biosynthetic process from pyruvate, arginine biosynthetic process, glutamine biosynthetic process	21.8299	16.98	1	5	5	6	377	40.5359	7.23975
	Afu5g03730	Afu5g03730 AspGDID:ASPL0000107551 COORDS:Chr5_A_fumigatus_Af293:1003579-1002437C, translated using codon table 1 (380 amino acids) Uncharacterized ORF; Protein of unknown function; calcium induced	21.8194	28.95	1	6	6	7	380	41.393	9.61279
	Afu6g05150	Afu6g05150 AspGDID:ASPL0000108970 COORDS:Chr6_A_fumigatus_Af293:1231600-1234035W, translated using codon table 1 (588 amino acids) Uncharacterized ORF; Ortholog(s) have histone binding, transcription corepressor activity	21.7664	15.65	1	7	7	7	588	63.9718	6.90283
	Afu5g11930	Afu5g11930 AspGDID:ASPL0000108249 COORDS:Chr5_A_fumigatus_Af293:3085969-3085103C, translated using codon table 1 (255 amino acids) Uncharacterized ORF; Ortholog(s) have U1 snRNP, nucleolus localization	21.6308	27.45	1	5	5	6	255	28.2317	7.92822
	Afu5g06190	steA AspGDID:ASPL0000107696 COORDS:Chr5_A_fumigatus_Af293:1482488-1484873W, translated using codon table 1 (688 amino acids) Uncharacterized ORF; Putative transcription factor	21.5302	9.01	1	7	7	8	688	76.5834	6.63916
	Afu5g08840	Afu5g08840 AspGDID:ASPL0000107955 COORDS:Chr5_A_fumigatus_Af293:2271612-2269438C, translated using codon table 1 (628 amino acids) Uncharacterized ORF; Ortholog(s) have methylated histone binding, transcription factor binding activity	21.4824	17.36	1	6	6	6	628	69.4315	6.29053
	Afu2g10100	aspf8 AspGDID:ASPL0000103725 COORDS:Chr2_A_fumigatus_Af293:2585506-2585100C, translated using codon table 1 (111 amino acids) Uncharacterized ORF; Allergen Asp f 8; putative ribosomal protein P2; transcript induced by growth on hydrogen peroxide and menadione	21.4749	72.07	1	4	4	4	111	11.1346	4.33545
	Afu5g09240	sod1 AspGDID:ASPL0000107993 COORDS:Chr5_A_fumigatus_Af293:2379492-2380591W, translated using codon table 1 (154 amino acids) Verified ORF; Cu/Zn superoxide dismutase; recognized by sera from aspergillosis patients; highly expressed in conidia; transcript induced by copper starvation, menadione, gliotoxin and growth at high temperature; protein induced by hydrogen peroxide	21.3631	59.74	1	5	5	5	154	15.9569	6.52197
	Afu2g04310	Afu2g04310 AspGDID:ASPL0000103257 COORDS:Chr2_A_fumigatus_Af293:1189815-1188083C, translated using codon table 1 (416 amino acids) Uncharacterized ORF; Argininosuccinate synthase; hypoxia induced protein	21.349	18.03	1	5	5	6	416	46.1043	5.47803
	Afu2g14260	Afu2g14260 AspGDID:ASPL0000104141 COORDS:Chr2_A_fumigatus_Af293:3734617-3737950W, translated using codon table 1 (1011 amino acids) Uncharacterized ORF; Ortholog of <i>A. nidulans FGSC A4</i> : AN6342, <i>A. niger CBS 513.88</i> : An02g01220, <i>A. oryzae RIB40</i> : AO090023000107, <i>Aspergillus wentii</i> : Aspwe1_0045565 and <i>Aspergillus sydowii</i> : Aspsy1_0031691	21.2995	5.24	1	4	4	6	1011	112.754	8.07471
	Afu2g15800	Afu2g15800 AspGDID:ASPL0000104297 COORDS:Chr2_A_fumigatus_Af293:4175679-4176371W, translated using codon table 1 (191 amino acids) Uncharacterized ORF; Ortholog of <i>A. nidulans</i> AN2171; calcium induced	21.1449	31.41	1	2	2	3	191	20.8951	9.96436
	Afu5g13480	Afu5g13480 AspGDID:ASPL0000108401 COORDS:Chr5_A_fumigatus_Af293:3542030-3540676C, translated using codon table 1 (382 amino acids) Uncharacterized ORF; Ortholog(s) have U1 snRNP, cytosol localization	21.0926	21.47	1	7	7	8	382	43.0539	10.0669
	Afu1g16840	Afu1g16840 AspGDID:ASPL0000102749 COORDS:Chr1_A_fumigatus_Af293:4595884-4595128C, translated using codon table 1 (179 amino acids) Uncharacterized ORF; TCTP family protein	21.0557	43.58	1	4	4	5	179	20.234	4.97021
	Afu5g04240	Afu5g04240 AspGDID:ASPL0000107603 COORDS:Chr5_A_fumigatus_Af293:1130792-1133676W, translated using codon table 1 (738 amino acids) Uncharacterized ORF; Ortholog(s) have protein domain specific binding, transcription regulatory region RNA binding activity	21.049	7.99	1	4	4	5	738	78.6386	9.67139
	Afu7g02350	Afu7g02350 AspGDID:ASPL0000110030 COORDS:Chr7_A_fumigatus_Af293:640713-636395C, translated using codon table 1 (1362 amino acids) Uncharacterized ORF; Ortholog(s) have role in conidium formation, syncytium formation by plasma membrane fusion and cell division site, cell tip, cytosol localization	21.0419	7.49	1	9	9	9	1362	156.094	6.72705
	Afu1g05390	Afu1g05390 AspGDID:ASPL0000101707 COORDS:Chr1_A_fumigatus_Af293:1549201-1548016C, translated using codon table 1 (308 amino acids) Uncharacterized ORF; Ortholog(s) have ATP:ADP antiporter activity	20.9316	14.29	1	4	4	5	308	33.3004	9.96436
	Afu1g05340	Afu1g05340 AspGDID:ASPL0000101702 COORDS:Chr1_A_fumigatus_Af293:1537487-1538453W, translated using codon table 1 (221 amino acids) Uncharacterized ORF; 40S ribosomal protein S19	20.8582	19.91	1	4	4	6	221	24.8199	9.53955
	Afu5g03490	ndk1 AspGDID:ASPL0000107527 COORDS:Chr5_A_fumigatus_Af293:944280-943353C, translated using codon table 1 (153 amino acids) Uncharacterized ORF; Putative nucleoside diphosphate kinase; induced by L-tyrosine	20.8558	48.37	1	5	5	5	153	16.9217	7.97217
	Afu1g13490	Afu1g13490 AspGDID:ASPL0000102417 COORDS:Chr1_A_fumigatus_Af293:3586808-3588296W, translated using codon table 1 (293 amino acids) Uncharacterized ORF; Putative spermidine synthase; protein induced by hydrogen peroxide	20.7505	17.75	1	4	4	5	293	33.4237	5.5415
	Afu2g05910	hxkA AspGDID:ASPL0000103414 COORDS:Chr2_A_fumigatus_Af293:1662852-1664600W, translated using codon table 1 (490 amino acids) Verified ORF; Putative hexokinase; protein induced by heat shock	20.6466	18.98	1	7	7	7	490	54.1746	5.17334
	Afu2g13110	cycA AspGDID:ASPL0000104025 COORDS:Chr2_A_fumigatus_Af293:3368165-3367112C, translated using codon table 1 (235 amino acids) Verified ORF; Cytochrome c; transcript derepressed during iron starvation in hapX mutant; SrbA-regulated during hypoxia; loss of cycA results in increased levels of AoxA activity, delayed germination and reduced growth in normoxia and hypoxia	20.5249	11.06	1	3	3	5	235	26.2545	10.0376
	Afu2g16370	Afu2g16370 AspGDID:ASPL0000104355 COORDS:Chr2_A_fumigatus_Af293:4343499-4342697C, translated using codon table 1 (131 amino acids) Uncharacterized ORF; 60S ribosomal protein L32	20.5056	44.27	1	6	6	7	131	14.9573	11.2681
	Afu2g04470	Afu2g04470 AspGDID:ASPL0000103272 COORDS:Chr2_A_fumigatus_Af293:1231100-1232641W, translated using codon table 1 (489 amino acids) Uncharacterized ORF; Ortholog of <i>A. nidulans FGSC A4</i> : AN1871, <i>A. niger CBS 513.88</i> : An11g03160, <i>A. oryzae RIB40</i> : AO090003000240, <i>Aspergillus wentii</i> : Aspwe1_0177180 and <i>Aspergillus sydowii</i> : Aspsy1_0140729	20.4462	18.2	1	5	5	5	489	55.2436	9.64209
	Afu3g07810	sdh1 AspGDID:ASPL0000105185 COORDS:Chr3_A_fumigatus_Af293:1970306-1968056C, translated using codon table 1 (647 amino acids) Uncharacterized ORF; Succinate dehydrogenase flavoprotein subunit; role in the citric acid cycle; up-regulated in conidia exposed to neutrophils and during conidial germination; hypoxia repressed protein and transcript; induced by exposure to artemisinin	20.1611	9.89	1	4	4	5	647	71.1033	6.97607
	Afu3g08090	Afu3g08090 AspGDID:ASPL0000105212 COORDS:Chr3_A_fumigatus_Af293:2068741-2069819W, translated using codon table 1 (261 amino acids) Uncharacterized ORF; Ortholog(s) have role in maturation of 5.8S rRNA from tricistronic rRNA transcript (SSU-rRNA, 5.8S rRNA, LSU-rRNA), maturation of LSU-rRNA from tricistronic rRNA transcript (SSU-rRNA, 5.8S rRNA, LSU-rRNA)	20.0675	20.31	1	4	4	5	261	29.8082	10.272
	Afu4g04520	Afu4g04520 AspGDID:ASPL0000106270 COORDS:Chr4_A_fumigatus_Af293:1276859-1275057C, translated using codon table 1 (444 amino acids) Uncharacterized ORF; Ortholog(s) have mitochondrion localization	20.0119	17.12	1	7	7	7	444	47.9867	5.70654
	Afu1g06770	Afu1g06770 AspGDID:ASPL0000101845 COORDS:Chr1_A_fumigatus_Af293:1933600-1932735C, translated using codon table 1 (119 amino acids) Uncharacterized ORF; 40S ribosomal protein S26	19.9384	37.82	1	4	4	6	119	13.4602	10.8726
	Afu6g09990	Afu6g09990 AspGDID:ASPL0000109355 COORDS:Chr6_A_fumigatus_Af293:2459187-2462825W, translated using codon table 1 (1095 amino acids) Uncharacterized ORF; Ortholog(s) have cytosol, nuclear envelope, nuclear membrane, nucleolus localization	19.9156	7.76	1	6	6	6	1095	121.526	4.729
	Afu6g12630	Afu6g12630 AspGDID:ASPL0000109606 COORDS:Chr6_A_fumigatus_Af293:3191249-3194824W, translated using codon table 1 (1127 amino acids) Uncharacterized ORF; Ortholog(s) have aminoacyl-tRNA editing activity, leucine-tRNA ligase activity, role in leucyl-tRNA aminoacylation, regulation of TOR signaling and cytosol localization	19.6741	5.32	1	4	4	5	1127	127.11	6.7417
	Afu5g05510	sgv1 AspGDID:ASPL0000107630 COORDS:Chr5_A_fumigatus_Af293:1281928-1279734C, translated using codon table 1 (580 amino acids) Uncharacterized ORF; Putative cyclin-dependent protein kinase	19.6519	10	1	6	6	6	580	65.065	8.67529
	Afu7g04210	Afu7g04210 AspGDID:ASPL0000110116 COORDS:Chr7_A_fumigatus_Af293:951859-952611W, translated using codon table 1 (161 amino acids) Uncharacterized ORF; Putative tropomyosin 1; protein induced by hydrogen peroxide; reacts with rabbit immunosera exposed to A. fumigatus conidia	19.5925	47.2	1	6	6	6	161	18.7575	5.03369
	Afu2g01790	Afu2g01790 AspGDID:ASPL0000103009 COORDS:Chr2_A_fumigatus_Af293:446245-448912W, translated using codon table 1 (871 amino acids) Uncharacterized ORF; Ortholog of <i>A. nidulans FGSC A4</i> : AN4650, <i>A. niger CBS 513.88</i> : An07g05410, <i>A. oryzae RIB40</i> : AO090011000436, <i>Aspergillus wentii</i> : Aspwe1_0112486 and <i>Aspergillus sydowii</i> : Aspsy1_0059416	19.4081	8.96	1	5	5	5	871	95.6643	9.20264
	Afu4g10460	hcsA AspGDID:ASPL0000106760 COORDS:Chr4_A_fumigatus_Af293:2741783-2743422W, translated using codon table 1 (463 amino acids) Verified ORF; Homocitrate synthase, essential enzyme of the alpha-aminoadipate pathway of lysine biosynthesis; transcript highly induced during conidial germination; protein induced by heat shock; SrbA-regulated during hypoxia; no human homolog	19.2682	15.98	1	5	5	5	463	50.5404	6.01123
	Afu1g05500	Afu1g05500 AspGDID:ASPL0000101718 COORDS:Chr1_A_fumigatus_Af293:1573104-1573616W, translated using codon table 1 (144 amino acids) Uncharacterized ORF; 40S ribosomal protein S12	19.2319	36.81	1	6	6	6	144	15.6639	5.35107
	Afu7g05980	Afu7g05980 AspGDID:ASPL0000110290 COORDS:Chr7_A_fumigatus_Af293:1468864-1469276W, translated using codon table 1 (95 amino acids) Uncharacterized ORF; Ortholog(s) have role in mRNA splicing, via spliceosome and U1 snRNP, U2 snRNP, U2-type prespliceosome, U4/U6 x U5 tri-snRNP complex, U5 snRNP, cytosol localization	19.1408	43.16	1	5	5	6	95	10.6818	9.5249
	Afu6g11260	Afu6g11260 AspGDID:ASPL0000109476 COORDS:Chr6_A_fumigatus_Af293:2786302-2787411W, translated using codon table 1 (266 amino acids) Uncharacterized ORF; Ribosomal protein L26; transcript induced by exposure to human airway epithelial cells	19.101	15.04	1	5	5	7	266	29.5987	10.9751
	Afu2g11800	Afu2g11800 AspGDID:ASPL0000103894 COORDS:Chr2_A_fumigatus_Af293:3040494-3041249W, translated using codon table 1 (177 amino acids) Uncharacterized ORF; Ortholog(s) have RNA cap binding activity, role in deadenylation-dependent decapping of nuclear-transcribed mRNA and cytoplasmic mRNA processing body, cytosol, mRNA cap binding complex, nucleus localization	19.0527	30.51	1	4	4	5	177	19.9135	6.354
	Afu3g06960	Afu3g06960 AspGDID:ASPL0000105107 COORDS:Chr3_A_fumigatus_Af293:1742922-1742198C, translated using codon table 1 (158 amino acids) Uncharacterized ORF; 60S ribosomal protein L21	18.8768	24.68	1	3	3	4	158	17.9697	10.228
	Afu1g05990	Afu1g05990 AspGDID:ASPL0000101768 COORDS:Chr1_A_fumigatus_Af293:1728875-1727904C, translated using codon table 1 (202 amino acids) Uncharacterized ORF; Ribosomal protein L16a	18.8635	20.79	1	6	6	7	202	23.0546	10.5063
	Afu7g02140	Afu7g02140 AspGDID:ASPL0000110009 COORDS:Chr7_A_fumigatus_Af293:573601-574445W, translated using codon table 1 (133 amino acids) Uncharacterized ORF; 40S ribosomal protein S24	18.8545	32.33	1	5	5	5	133	15.3054	10.7407
	Afu2g00720	Afu2g00720 AspGDID:ASPL0000102904 COORDS:Chr2_A_fumigatus_Af293:161113-162800W, translated using codon table 1 (492 amino acids) Uncharacterized ORF; Putative aldehyde dehydrogenase (NAD+)	18.8535	15.45	1	7	7	7	492	51.9098	5.80811
	Afu2g09940	Afu2g09940 AspGDID:ASPL0000103710 COORDS:Chr2_A_fumigatus_Af293:2547185-2545830C, translated using codon table 1 (431 amino acids) Uncharacterized ORF; Ortholog of <i>A. nidulans FGSC A4</i> : AN6012, <i>A. niger CBS 513.88</i> : An16g05120, <i>A. oryzae RIB40</i> : AO090011000973, <i>Aspergillus wentii</i> : Aspwe1_0054408 and <i>Aspergillus sydowii</i> : Aspsy1_0089386	18.8234	20.65	1	5	5	5	431	47.4037	7.56201
	Afu2g07620	Afu2g07620 AspGDID:ASPL0000103483 COORDS:Chr2_A_fumigatus_Af293:1942912-1941117C, translated using codon table 1 (534 amino acids) Uncharacterized ORF; Cystathionine beta-synthase; transcript induced by exposure to human airway epithelial cells	18.7456	15.54	1	5	5	5	534	57.7783	6.97607
	Afu2g03010	cox5b AspGDID:ASPL0000103130 COORDS:Chr2_A_fumigatus_Af293:772718-771517C, translated using codon table 1 (191 amino acids) Uncharacterized ORF; Putative cytochrome C subunit Vb; hypoxia induced protein	18.6348	44.5	1	5	5	5	191	21.5048	6.60986
	Afu4g03760	Afu4g03760 AspGDID:ASPL0000106195 COORDS:Chr4_A_fumigatus_Af293:1054642-1057888W, translated using codon table 1 (1060 amino acids) Uncharacterized ORF; Putative glycine dehydrogenase	18.6231	10.19	1	6	6	6	1060	115.13	7.15186
	Afu4g03980	Afu4g03980 AspGDID:ASPL0000106217 COORDS:Chr4_A_fumigatus_Af293:1123952-1122258C, translated using codon table 1 (529 amino acids) Uncharacterized ORF; Ortholog of <i>A. nidulans FGSC A4</i> : AN7048, <i>A. niger CBS 513.88</i> : An14g00890, <i>A. oryzae RIB40</i> : AO090011000319, <i>Aspergillus wentii</i> : Aspwe1_0115559 and <i>Aspergillus sydowii</i> : Aspsy1_0184047	18.5868	15.12	1	5	5	5	529	57.9128	9.26123
	Afu5g12070	Afu5g12070 AspGDID:ASPL0000108263 COORDS:Chr5_A_fumigatus_Af293:3126791-3128332W, translated using codon table 1 (513 amino acids) Uncharacterized ORF; Has domain(s) with predicted calcium ion binding activity	18.5155	15.59	1	7	7	7	513	56.7154	9.67139
	Afu4g07580	Afu4g07580 AspGDID:ASPL0000106473 COORDS:Chr4_A_fumigatus_Af293:1969969-1971642W, translated using codon table 1 (516 amino acids) Uncharacterized ORF; Translation initiation factor EF-2 gamma subunit	18.4394	15.5	1	5	5	5	516	56.1044	7.09326
	Afu3g05350	htb1 AspGDID:ASPL0000104951 COORDS:Chr3_A_fumigatus_Af293:1290859-1290284C, translated using codon table 1 (140 amino acids) Uncharacterized ORF; Histone H2B	18.4335	32.14	1	5	5	7	140	14.9461	10.1255
	Afu6g14330	Afu6g14330 AspGDID:ASPL0000109772 COORDS:Chr6_A_fumigatus_Af293:3648908-3645016C, translated using codon table 1 (1281 amino acids) Uncharacterized ORF; Ortholog(s) have cytosol localization	18.243	6.17	1	6	6	6	1281	138.541	6.12549
	Afu1g06340	Afu1g06340 AspGDID:ASPL0000101802 COORDS:Chr1_A_fumigatus_Af293:1821569-1822486W, translated using codon table 1 (186 amino acids) Uncharacterized ORF; Putative 60S ribosomal protein L27	18.2166	27.96	1	6	6	6	186	21.4366	10.4917
	Afu3g07830	Afu3g07830 AspGDID:ASPL0000105187 COORDS:Chr3_A_fumigatus_Af293:1972897-1974834W, translated using codon table 1 (535 amino acids) Uncharacterized ORF; Ortholog(s) have unfolded protein binding activity, role in protein folding and chaperonin-containing T-complex, nucleus localization	18.1297	10.09	1	4	4	5	535	57.5166	8.36768
	Afu2g07380	Afu2g07380 AspGDID:ASPL0000103461 COORDS:Chr2_A_fumigatus_Af293:1879464-1878670C, translated using codon table 1 (184 amino acids) Uncharacterized ORF; Ribosomal protein L18	18.0058	25	1	4	4	5	184	20.8407	11.8101
	Afu6g02440	Afu6g02440 AspGDID:ASPL0000108699 COORDS:Chr6_A_fumigatus_Af293:459025-459857W, translated using codon table 1 (160 amino acids) Uncharacterized ORF; 60s ribosomal protein L24; ortholog of <i>S. cerevisiae</i> RPL24A and RPL24B; transcript induced by exposure to human airway epithelial cells	17.6833	28.75	1	6	6	6	160	18.041	11.312
	Afu2g02320	Afu2g02320 AspGDID:ASPL0000103062 COORDS:Chr2_A_fumigatus_Af293:586013-584085C, translated using codon table 1 (571 amino acids) Uncharacterized ORF; Hsp70 chaperone	17.6603	14.71	1	6	6	6	571	61.7457	5.14795
	Afu1g07540	Afu1g07540 AspGDID:ASPL0000101919 COORDS:Chr1_A_fumigatus_Af293:2122943-2124145W, translated using codon table 1 (350 amino acids) Uncharacterized ORF; Ortholog(s) have role in cellular response to drug and nuclear envelope, proteasome regulatory particle, lid subcomplex, proteasome storage granule localization	17.5418	20.57	1	3	3	3	350	38.9712	6.01123
	Afu4g04350	Afu4g04350 AspGDID:ASPL0000106252 COORDS:Chr4_A_fumigatus_Af293:1231191-1235612W, translated using codon table 1 (1418 amino acids) Uncharacterized ORF; Has domain(s) with predicted nucleoside-triphosphatase activity, nucleotide binding, pre-mRNA intronic binding activity, role in mRNA splicing, via spliceosome and spliceosomal complex localization	17.3272	5.57	1	6	6	6	1418	161.396	6.31592
	Afu3g08120	Afu3g08120 AspGDID:ASPL0000105215 COORDS:Chr3_A_fumigatus_Af293:2090173-2088525C, translated using codon table 1 (485 amino acids) Uncharacterized ORF; Has domain(s) with predicted role in mRNA processing	17.3155	8.87	1	5	5	5	485	56.7447	11.6196
	Afu3g13030	Afu3g13030 AspGDID:ASPL0000105699 COORDS:Chr3_A_fumigatus_Af293:3459705-3461612W, translated using codon table 1 (540 amino acids) Uncharacterized ORF; Ortholog(s) have unfolded protein binding activity, role in cellular response to drug, protein folding and chaperonin-containing T-complex, nucleus localization	17.2689	14.26	1	7	7	7	540	59.3149	6.21436
	Afu1g04660	Afu1g04660 AspGDID:ASPL0000101635 COORDS:Chr1_A_fumigatus_Af293:1318902-1317870C, translated using codon table 1 (203 amino acids) Uncharacterized ORF; Ribosomal protein L15	17.0814	32.02	1	6	6	6	203	24.169	11.2974
	Afu5g07780	erg1 AspGDID:ASPL0000107850 COORDS:Chr5_A_fumigatus_Af293:1942829-1944341W, translated using codon table 1 (481 amino acids) Verified ORF; Putative squalene monooxygenase; higher expression in 48 h biofilm vs planktonic cells; SrbA-regulated during hypoxia	17.071	14.97	1	4	4	4	481	52.6486	8.67529
	Afu1g11730	Afu1g11730 AspGDID:ASPL0000102237 COORDS:Chr1_A_fumigatus_Af293:3087288-3088069W, translated using codon table 1 (183 amino acids) Uncharacterized ORF; Ortholog(s) have GTPase activity, role in ER to Golgi vesicle-mediated transport, Golgi to plasma membrane transport, cellular response to drug, macroautophagy and Golgi apparatus, glyoxysome localization	16.9178	37.16	1	4	4	4	183	20.9899	5.70654
	Afu1g01740	Afu1g01740 AspGDID:ASPL0000101344 COORDS:Chr1_A_fumigatus_Af293:538203-536416C, translated using codon table 1 (531 amino acids) Uncharacterized ORF; Ortholog(s) have unfolded protein binding activity, role in protein folding and chaperonin-containing T-complex, nucleus localization	16.8805	10.55	1	3	3	4	531	57.1551	6.21436
	Afu2g01010	Afu2g01010 AspGDID:ASPL0000102932 COORDS:Chr2_A_fumigatus_Af293:234729-236432W, translated using codon table 1 (534 amino acids) Uncharacterized ORF; Putative myo-inositol-phosphate synthase; transcript up-regulated in conidia exposed to neutrophils	16.7991	14.98	1	6	6	6	534	58.6346	6.22705
	Afu3g05370	Afu3g05370 AspGDID:ASPL0000104953 COORDS:Chr3_A_fumigatus_Af293:1293607-1295556W, translated using codon table 1 (461 amino acids) Uncharacterized ORF; Putative dihydrolipoamide succinyltransferase; reacts with rabbit immunosera exposed to A. fumigatus conidia; hypoxia induced protein; transcript induced by exposure to human airway epithelial cells	16.7027	13.88	1	5	5	6	461	50.3374	8.88037
	Afu3g11360	Afu3g11360 AspGDID:ASPL0000105534 COORDS:Chr3_A_fumigatus_Af293:2979671-2978196C, translated using codon table 1 (451 amino acids) Uncharacterized ORF; Ortholog(s) have role in ascospore formation, cellular protein localization, cellular response to caffeine and eukaryotic translation initiation factor 3 complex assembly, <a href="#GOsection">more</a>	16.4598	17.52	1	7	7	7	451	51.7173	5.35107
	Afu2g14800	Afu2g14800 AspGDID:ASPL0000104194 COORDS:Chr2_A_fumigatus_Af293:3902989-3901286C, translated using codon table 1 (508 amino acids) Uncharacterized ORF; Has domain(s) with predicted protein dimerization activity	16.4459	8.66	1	3	3	6	508	55.3848	9.33447
	Afu3g12100	Afu3g12100 AspGDID:ASPL0000105606 COORDS:Chr3_A_fumigatus_Af293:3178707-3181079W, translated using codon table 1 (694 amino acids) Uncharacterized ORF; Putative trehalase phosphorylase with a predicted role in the glucose-1-phosphate pathway	16.4277	10.95	1	4	4	4	694	78.2557	6.1001
	Afu5g06680	gatA AspGDID:ASPL0000107744 COORDS:Chr5_A_fumigatus_Af293:1641603-1643263W, translated using codon table 1 (499 amino acids) Uncharacterized ORF; 4-aminobutyrate aminotransferase; transcript downregulated in response to voriconazole; calcium induced	16.3654	11.42	1	4	4	5	499	55.1725	8.93896
	Afu3g08660	idp1 AspGDID:ASPL0000105268 COORDS:Chr3_A_fumigatus_Af293:2219058-2221293W, translated using codon table 1 (501 amino acids) Uncharacterized ORF; Putative isocitrate dehydrogenase; protein induced by heat shock	16.22	11.58	1	6	6	6	501	55.7396	8.73389
	Afu5g04250	cysD AspGDID:ASPL0000107604 COORDS:Chr5_A_fumigatus_Af293:1136288-1134676C, translated using codon table 1 (434 amino acids) Uncharacterized ORF; Homocysteine synthase; transcript up-regulated in conidia exposed to neutrophils	15.9018	11.75	1	3	3	4	434	46.8658	6.354
	Afu2g10420	Afu2g10420 AspGDID:ASPL0000103757 COORDS:Chr2_A_fumigatus_Af293:2667447-2668759W, translated using codon table 1 (397 amino acids) Uncharacterized ORF; Has domain(s) with predicted branched-chain-amino-acid transaminase activity, catalytic activity and role in branched-chain amino acid metabolic process, metabolic process	15.8998	19.65	1	5	5	5	397	43.9797	6.55127
	Afu5g04320	Afu5g04320 AspGDID:ASPL0000107611 COORDS:Chr5_A_fumigatus_Af293:1159452-1158435C, translated using codon table 1 (201 amino acids) Uncharacterized ORF; Ortholog(s) have GTPase activity and role in ER to Golgi vesicle-mediated transport, Golgi organization, cellular response to drug, cellular response to nitrogen starvation, negative regulation of G0 to G1 transition, protein secretion	15.8602	30.85	1	6	6	6	201	22.2891	5.2749
	Afu2g10550	Afu2g10550 AspGDID:ASPL0000103770 COORDS:Chr2_A_fumigatus_Af293:2698030-2696301C, translated using codon table 1 (529 amino acids) Uncharacterized ORF; Protein of unknown function; calcium induced	15.847	12.67	1	3	3	4	529	56.5226	9.37842
	Afu7g05650	Afu7g05650 AspGDID:ASPL0000110258 COORDS:Chr7_A_fumigatus_Af293:1371503-1372721W, translated using codon table 1 (349 amino acids) Uncharacterized ORF; Ortholog of <i>Aspergillus fumigatus A1163</i> : AFUB_091230	15.8329	11.75	1	2	2	3	349	37.8114	9.02686
	Afu5g01730	Afu5g01730 AspGDID:ASPL0000107353 COORDS:Chr5_A_fumigatus_Af293:439787-433626C, translated using codon table 1 (2031 amino acids) Uncharacterized ORF; Has domain(s) with predicted DNA binding, chromatin binding activity	15.5695	4.38	1	6	6	6	2031	222.552	9.40771
	Afu4g07730	Afu4g07730 AspGDID:ASPL0000106488 COORDS:Chr4_A_fumigatus_Af293:2023719-2022959C, translated using codon table 1 (176 amino acids) Uncharacterized ORF; 60S ribosomal protein L11; transcript induced by exposure to human airway epithelial cells	15.5042	28.41	1	5	5	5	176	20.1006	10.0229
	Afu2g16910	Afu2g16910 AspGDID:ASPL0000104410 COORDS:Chr2_A_fumigatus_Af293:4522596-4521467C, translated using codon table 1 (311 amino acids) Uncharacterized ORF; Ortholog of <i>A. nidulans FGSC A4</i> : AN7291, <i>A. oryzae RIB40</i> : AO090102000654, <i>Aspergillus wentii</i> : Aspwe1_0171092, <i>Aspergillus sydowii</i> : Aspsy1_0027159 and <i>Aspergillus terreus NIH2624</i> : ATET_10094	15.3727	21.22	1	4	4	4	311	35.5465	5.19873
	Afu6g02610	Afu6g02610 AspGDID:ASPL0000108716 COORDS:Chr6_A_fumigatus_Af293:499838-499461C, translated using codon table 1 (125 amino acids) Uncharacterized ORF; Ortholog of <i>A. nidulans FGSC A4</i> : AN8719, <i>Aspergillus wentii</i> : Aspwe1_0035812, <i>Aspergillus versicolor</i> : Aspve1_0821842, <i>Aspergillus niger ATCC 1015</i> : 185766-mRNA and <i>Aspergillus zonatus</i> : Aspzo1_0019781	15.1667	47.2	1	3	3	4	125	13.0283	7.04932
	Afu1g14990	Afu1g14990 AspGDID:ASPL0000102566 COORDS:Chr1_A_fumigatus_Af293:4026146-4028694W, translated using codon table 1 (830 amino acids) Uncharacterized ORF; Ortholog(s) have nucleolus localization	14.9913	7.83	1	5	5	5	830	91.5624	5.42725
	Afu6g11070	Afu6g11070 AspGDID:ASPL0000109459 COORDS:Chr6_A_fumigatus_Af293:2727896-2730328W, translated using codon table 1 (787 amino acids) Uncharacterized ORF; Ortholog(s) have cytosol, nucleus localization	14.9288	9.66	1	4	4	4	787	89.2486	8.52881
	Afu6g02630	Afu6g02630 AspGDID:ASPL0000108718 COORDS:Chr6_A_fumigatus_Af293:512097-510055C, translated using codon table 1 (441 amino acids) Uncharacterized ORF; Ortholog(s) have ATP-dependent RNA helicase activity	14.7869	13.83	1	3	3	3	441	49.5704	5.8208
	Afu1g13610	Afu1g13610 AspGDID:ASPL0000102429 COORDS:Chr1_A_fumigatus_Af293:3620539-3622641W, translated using codon table 1 (700 amino acids) Uncharacterized ORF; Ortholog of <i>A. nidulans FGSC A4</i> : AN0698, AN9272, <i>A. fumigatus Af293</i> : Afu4g09370, <i>A. niger CBS 513.88</i> : An08g06690, An07g08670, <i>A. oryzae RIB40</i> : AO090012000513 and <i>Aspergillus wentii</i> : Aspwe1_0171952	14.7654	5.86	1	3	3	4	700	70.5736	8.88037
	Afu5g05920	Afu5g05920 AspGDID:ASPL0000107669 COORDS:Chr5_A_fumigatus_Af293:1392015-1389862C, translated using codon table 1 (699 amino acids) Uncharacterized ORF; Putative glycyl-tRNA synthetase; protein induced by heat shock	14.75	7.58	1	4	4	4	699	79.0498	6.46826
	Afu2g03720	cyp4 AspGDID:ASPL0000103198 COORDS:Chr2_A_fumigatus_Af293:995026-995900W, translated using codon table 1 (205 amino acids) Uncharacterized ORF; Putative cyclophilin; peptidyl-prolyl cis-trans isomerase; allergen Asp f 11; transcript induced by growth on hydrogen peroxide	14.7376	16.59	1	4	4	5	205	22.2763	8.57275
	Afu3g10100	Afu3g10100 AspGDID:ASPL0000105407 COORDS:Chr3_A_fumigatus_Af293:2602320-2600323C, translated using codon table 1 (299 amino acids) Uncharacterized ORF; Ortholog(s) have role in mRNA export from nucleus and nucleus localization	14.6985	18.06	1	4	4	4	299	35.0664	9.49561
	Afu4g03050	pfy1 AspGDID:ASPL0000106123 COORDS:Chr4_A_fumigatus_Af293:854319-853521C, translated using codon table 1 (131 amino acids) Uncharacterized ORF; Profilin	14.6845	32.06	1	2	2	3	131	13.9389	5.47803
	Afu3g13150	Afu3g13150 AspGDID:ASPL0000105710 COORDS:Chr3_A_fumigatus_Af293:3491125-3489529C, translated using codon table 1 (506 amino acids) Uncharacterized ORF; Ortholog of <i>A. nidulans FGSC A4</i> : AN3178/sds3, <i>A. niger CBS 513.88</i> : An02g09020, <i>A. oryzae RIB40</i> : AO090012000818, <i>Aspergillus wentii</i> : Aspwe1_0170080 and <i>Aspergillus sydowii</i> : Aspsy1_0056129	14.6683	9.49	1	4	4	5	506	56.013	7.44482
	Afu6g07390	lysB AspGDID:ASPL0000109101 COORDS:Chr6_A_fumigatus_Af293:1667162-1668427W, translated using codon table 1 (358 amino acids) Verified ORF; Putative homoisocitrate dehydrogenase with a role in lysine metabolism; hypoxia induced protein	14.6093	16.2	1	5	5	5	358	38.0701	6.21436
	Afu5g06010	Afu5g06010 AspGDID:ASPL0000107678 COORDS:Chr5_A_fumigatus_Af293:1425309-1424188C, translated using codon table 1 (247 amino acids) Uncharacterized ORF; Ortholog(s) have ribosomal large subunit binding activity	14.5902	22.67	1	3	3	3	247	26.5706	4.85596
	Afu1g06170	Afu1g06170 AspGDID:ASPL0000101785 COORDS:Chr1_A_fumigatus_Af293:1784284-1782664C, translated using codon table 1 (464 amino acids) Uncharacterized ORF; Ortholog(s) have role in positive regulation of RNA polymerase II transcriptional preinitiation complex assembly, proteasome regulatory particle assembly, ubiquitin-dependent protein catabolic process	14.5128	11.21	1	4	4	5	464	51.6705	4.97021
	Afu2g13860	Afu2g13860 AspGDID:ASPL0000104101 COORDS:Chr2_A_fumigatus_Af293:3619597-3620049W, translated using codon table 1 (142 amino acids) Uncharacterized ORF; Histone H4	14.4876	28.17	1	4	4	5	142	15.7624	10.2134
	Afu4g03850	Afu4g03850 AspGDID:ASPL0000106204 COORDS:Chr4_A_fumigatus_Af293:1081525-1084590W, translated using codon table 1 (894 amino acids) Uncharacterized ORF; Ortholog(s) have protein serine/threonine kinase activity, protein tyrosine kinase activity	14.4476	6.71	1	4	4	4	894	99.7308	9.43701
	Afu5g03160	Afu5g03160 AspGDID:ASPL0000107495 COORDS:Chr5_A_fumigatus_Af293:857006-860414W, translated using codon table 1 (1092 amino acids) Uncharacterized ORF; Has domain(s) with predicted ATP binding, protein kinase activity, protein tyrosine kinase activity, transferase activity, transferring phosphorus-containing groups activity and role in protein phosphorylation	14.4305	5.04	1	4	4	5	1092	124.493	10.3452
	Afu3g11710	Afu3g11710 AspGDID:ASPL0000105567 COORDS:Chr3_A_fumigatus_Af293:3077527-3075881C, translated using codon table 1 (374 amino acids) Uncharacterized ORF; Ortholog(s) have mRNA binding, saccharopine dehydrogenase (NAD+, L-lysine-forming) activity, role in lysine biosynthetic process via aminoadipic acid and cytoplasm localization	14.4285	14.44	1	5	5	5	374	41.1903	5.33838
	Afu6g12170	fkbp1 AspGDID:ASPL0000109562 COORDS:Chr6_A_fumigatus_Af293:3060448-3061084W, translated using codon table 1 (112 amino acids) Uncharacterized ORF; Putative FK506-binding protein (FKBP)-type peptidyl-prolyl cis-trans isomerase; transcript induced by exposure to human airway epithelial cells	14.3634	46.43	1	4	4	4	112	12.1222	7.25439
	Afu6g08750	Afu6g08750 AspGDID:ASPL0000109231 COORDS:Chr6_A_fumigatus_Af293:2073566-2071674C, translated using codon table 1 (578 amino acids) Uncharacterized ORF; Ortholog(s) have role in hyphal growth and cytosol, mitochondrion localization	14.2448	11.42	1	3	3	3	578	62.9819	8.17725
	Afu7g01860	sti1 AspGDID:ASPL0000109981 COORDS:Chr7_A_fumigatus_Af293:501500-503455W, translated using codon table 1 (581 amino acids) Verified ORF; Putative heat shock protein; protein levels increase in response to amphotericin B; transcript induced by exposure to human airway epithelial cells; induced by gliotoxin exposure	14.2174	13.08	1	5	5	5	581	64.2614	5.57959
	Afu3g06530	sC AspGDID:ASPL0000105064 COORDS:Chr3_A_fumigatus_Af293:1618981-1616721C, translated using codon table 1 (574 amino acids) Uncharacterized ORF; Putative ATP sulfurylase; sulfate adenylyltransferase; reacts with rabbit immunosera exposed to A. fumigatus conidia; hypoxia repressed protein	14.1351	9.06	1	4	4	4	574	64.2932	7.06396
	Afu3g12690	glfA AspGDID:ASPL0000105665 COORDS:Chr3_A_fumigatus_Af293:3368002-3366055C, translated using codon table 1 (532 amino acids) Verified ORF; Putative UDP-galactopyranose mutase, enzyme in the first step of galactofuranose biosynthesis; mutant unmasks mannan residues on the cell surface, which is thought to contribute to increased cell adhesion	14.1036	12.22	1	6	6	6	532	59.4418	6.93213
	Afu7g02280	Afu7g02280 AspGDID:ASPL0000110023 COORDS:Chr7_A_fumigatus_Af293:615143-616459W, translated using codon table 1 (359 amino acids) Uncharacterized ORF; Ortholog(s) have U5 snRNP, spliceosomal complex localization	14.0262	17.27	1	5	5	5	359	39.2328	6.91748
	Afu2g13980	Afu2g13980 AspGDID:ASPL0000104113 COORDS:Chr2_A_fumigatus_Af293:3653885-3651767C, translated using codon table 1 (649 amino acids) Uncharacterized ORF; Ortholog(s) have ATP-dependent DNA helicase activity, ATP-dependent DNA/RNA helicase activity, ATP-dependent RNA helicase activity and role in maturation of LSU-rRNA from tricistronic rRNA transcript (SSU-rRNA, 5.8S rRNA, LSU-rRNA)	14.0083	10.79	1	5	5	6	649	72.4975	9.45166
	Afu2g05650	Afu2g05650 AspGDID:ASPL0000103388 COORDS:Chr2_A_fumigatus_Af293:1582005-1580139C, translated using codon table 1 (604 amino acids) Uncharacterized ORF; Ortholog(s) have asparagine-tRNA ligase activity, role in asparaginyl-tRNA aminoacylation and cytosol localization	13.9604	17.55	1	4	4	4	604	68.2394	6.13818
	Afu5g06390	Afu5g06390 AspGDID:ASPL0000107715 COORDS:Chr5_A_fumigatus_Af293:1536841-1538186W, translated using codon table 1 (338 amino acids) Uncharacterized ORF; Putative adenosine kinase	13.9169	19.23	1	4	4	4	338	36.8353	5.17334
	Afu6g02230	glkA AspGDID:ASPL0000108678 COORDS:Chr6_A_fumigatus_Af293:395467-393918C, translated using codon table 1 (493 amino acids) Verified ORF; Putative glucokinase; conidia-enriched protein; transcripts extremely abundant in resting conidia, levels decline during germination; transcript induced by exposure to human airway epithelial cells	13.8281	10.75	1	4	4	5	493	54.4198	5.50342
	Afu4g11510	srb1 AspGDID:ASPL0000106859 COORDS:Chr4_A_fumigatus_Af293:3032998-3031629C, translated using codon table 1 (364 amino acids) Verified ORF; GDP-mannose pyrophosphorylase, which catalyses the synthesis of GDP-mannose from GTP and mannose-1-phosphate in cell wall biosynthesis	13.7589	15.11	1	4	4	4	364	40.0991	7.48877
	Afu2g05110	Afu2g05110 AspGDID:ASPL0000103336 COORDS:Chr2_A_fumigatus_Af293:1403645-1403098C, translated using codon table 1 (120 amino acids) Uncharacterized ORF; Ortholog(s) have U1 snRNP, U2 snRNP, cytosol localization	13.7353	38.33	1	3	3	3	120	13.2392	11.2827
	Afu2g04710	Afu2g04710 AspGDID:ASPL0000103297 COORDS:Chr2_A_fumigatus_Af293:1288894-1287776C, translated using codon table 1 (217 amino acids) Uncharacterized ORF; Has domain(s) with predicted heme binding activity	13.7338	29.95	1	3	3	3	217	23.8966	5.59229
	Afu6g06325	Afu6g06325 AspGDID:ASPL0000108991 COORDS:Chr6_A_fumigatus_Af293:1334658-1334305C, translated using codon table 1 (98 amino acids) Uncharacterized ORF; Ortholog(s) have RNA binding activity and role in mRNA splicing, via spliceosome, maturation of SSU-rRNA	13.6858	33.67	1	3	3	4	98	10.6003	4.71631
	Afu3g08940	Afu3g08940 AspGDID:ASPL0000105295 COORDS:Chr3_A_fumigatus_Af293:2286027-2286949W, translated using codon table 1 (280 amino acids) Uncharacterized ORF; Ortholog(s) have role in ubiquitin-dependent protein catabolic process and nucleus, proteasome regulatory particle, lid subcomplex, proteasome storage granule localization	13.5758	24.29	1	5	5	5	280	31.1431	4.99561
	Afu5g07800	Afu5g07800 AspGDID:ASPL0000107852 COORDS:Chr5_A_fumigatus_Af293:1954043-1956749W, translated using codon table 1 (439 amino acids) Uncharacterized ORF; Ortholog of <i>A. nidulans FGSC A4</i> : AN7749, <i>A. niger CBS 513.88</i> : An03g03800, <i>A. oryzae RIB40</i> : AO090701000914, <i>Aspergillus wentii</i> : Aspwe1_0101068 and <i>Aspergillus sydowii</i> : Aspsy1_0058767	13.5665	12.76	1	3	3	4	439	45.7156	10.2134
	Afu3g10660	erg13 AspGDID:ASPL0000105464 COORDS:Chr3_A_fumigatus_Af293:2760689-2762268W, translated using codon table 1 (460 amino acids) Uncharacterized ORF; Putative hydroxymethyl glutaryl-coenzyme A synthase with a predicted role in ergosterol biosynthesis; SrbA-regulated during hypoxia	13.5572	11.96	1	3	3	3	460	50.7644	6.55127
	Afu6g08720	Afu6g08720 AspGDID:ASPL0000109228 COORDS:Chr6_A_fumigatus_Af293:2067644-2066477C, translated using codon table 1 (342 amino acids) Uncharacterized ORF; Putative 5'-methylthioadenosine phosphorylase; transcript induced by exposure to human airway epithelial cells	13.5423	13.74	1	3	3	4	342	37.582	7.38623
	Afu1g03100	Afu1g03100 AspGDID:ASPL0000101480 COORDS:Chr1_A_fumigatus_Af293:895958-895076C, translated using codon table 1 (165 amino acids) Uncharacterized ORF; Putative ATP synthase delta chain	13.5024	24.85	1	3	3	4	165	17.6294	5.35107
	Afu5g06750	cpcC AspGDID:ASPL0000107751 COORDS:Chr5_A_fumigatus_Af293:1659910-1665004W, translated using codon table 1 (1592 amino acids) Verified ORF; Putative protein kinase for translation initiation factor eIF2; <I>S. cerevisiae</I> ortholog GCN2 has role in cellular amino acid biosynthetic process, regulation of translational initiation, DNA damage checkpoint, protein phosphorylation	13.4888	5.28	1	6	6	6	1592	179.626	6.80029
	Afu2g11475	Afu2g11475 AspGDID:ASPL0000363557 COORDS:Chr2_A_fumigatus_Af293:2956635-2957821W, translated using codon table 1 (305 amino acids) Uncharacterized ORF; Ortholog(s) have role in endocytosis, establishment or maintenance of actin cytoskeleton polarity, vacuole organization and integral component of Golgi membrane localization	13.4813	17.38	1	3	3	3	305	33.5423	5.2749
	Afu7g05260	Afu7g05260 AspGDID:ASPL0000110219 COORDS:Chr7_A_fumigatus_Af293:1249230-1250373W, translated using codon table 1 (304 amino acids) Uncharacterized ORF; Has domain(s) with predicted nucleic acid binding, nucleotide binding activity	13.4429	12.5	1	2	2	3	304	34.3573	8.71924
	Afu2g15210	Afu2g15210 AspGDID:ASPL0000104238 COORDS:Chr2_A_fumigatus_Af293:4030734-4031231W, translated using codon table 1 (98 amino acids) Uncharacterized ORF; Ortholog(s) have RNA binding activity, role in mRNA splicing, via spliceosome and U4/U6 x U5 tri-snRNP complex, U6 snRNP, cytoplasmic mRNA processing body, cytosol, nucleolus, small nucleolar ribonucleoprotein complex localization	13.3946	44.9	1	3	3	3	98	11.243	9.08545
	Afu1g04530	Afu1g04530 AspGDID:ASPL0000101621 COORDS:Chr1_A_fumigatus_Af293:1282636-1283216W, translated using codon table 1 (148 amino acids) Uncharacterized ORF; Ribosomal L18ae protein family	13.385	31.08	1	4	4	4	148	17.3925	10.6968
	Afu2g04750	Afu2g04750 AspGDID:ASPL0000103300 COORDS:Chr2_A_fumigatus_Af293:1300310-1298370C, translated using codon table 1 (646 amino acids) Uncharacterized ORF; Ortholog of <i>A. nidulans FGSC A4</i> : AN2070, <i>A. niger CBS 513.88</i> : An11g04410, <i>A. oryzae RIB40</i> : AO090003000278, <i>Aspergillus wentii</i> : Aspwe1_0718370 and <i>Aspergillus sydowii</i> : Aspsy1_0142154	13.265	7.74	1	4	4	4	646	68.9035	9.86182
	Afu2g11130	Afu2g11130 AspGDID:ASPL0000103828 COORDS:Chr2_A_fumigatus_Af293:2853503-2851419C, translated using codon table 1 (553 amino acids) Uncharacterized ORF; Has domain(s) with predicted role in regulation of transcription, DNA-templated and nucleus localization	13.2172	6.15	1	3	3	4	553	60.4539	6.53662
	Afu3g05360	Afu3g05360 AspGDID:ASPL0000104952 COORDS:Chr3_A_fumigatus_Af293:1291520-1292443W, translated using codon table 1 (265 amino acids) Uncharacterized ORF; Has domain(s) with predicted DNA binding, protein heterodimerization activity, role in nucleosome assembly and nucleosome, nucleus localization	13.0961	16.98	1	2	3	3	265	29.7817	10.1548
	Afu2g17000	Afu2g17000 AspGDID:ASPL0000104419 COORDS:Chr2_A_fumigatus_Af293:4544466-4551049W, translated using codon table 1 (2173 amino acids) Uncharacterized ORF; Ortholog of <i>A. nidulans FGSC A4</i> : AN5649, AN1674, AN0384, AN1268, AN7262, <i>A. fumigatus Af293</i> : Afu1g01700, Afu4g08730, Afu4g13630, Afu1g10012 and <i>A. niger CBS 513.88</i> : An01g09380, An01g06520, An04g09080, An04g03600	13.0501	3.64	1	4	4	4	2173	224.251	3.99268
	Afu5g11320	aspf29 AspGDID:ASPL0000108191 COORDS:Chr5_A_fumigatus_Af293:2903022-2902611C, translated using codon table 1 (110 amino acids) Verified ORF; Allergen Asp f 29; putative thioredoxin	13.0127	49.09	1	4	4	4	110	11.968	5.22412
	Afu5g12570	Afu5g12570 AspGDID:ASPL0000108311 COORDS:Chr5_A_fumigatus_Af293:3257995-3258330W, translated using codon table 1 (83 amino acids) Uncharacterized ORF; Ortholog(s) have RNA binding activity, role in mRNA splicing, via spliceosome and U4/U6 x U5 tri-snRNP complex, U6 snRNP, cytoplasm, nucleolus, small nucleolar ribonucleoprotein complex localization	13.0093	51.81	1	2	2	2	83	9.3466	4.37354
	Afu2g13480	Afu2g13480 AspGDID:ASPL0000104063 COORDS:Chr2_A_fumigatus_Af293:3491973-3494492W, translated using codon table 1 (839 amino acids) Uncharacterized ORF; Ortholog of <i>A. nidulans FGSC A4</i> : AN10799, <i>A. niger CBS 513.88</i> : An02g02390, <i>A. oryzae RIB40</i> : AO090026000326, <i>Aspergillus wentii</i> : Aspwe1_0045443 and <i>Aspergillus sydowii</i> : Aspsy1_0151451	12.945	10.13	1	5	5	5	839	94.3821	8.74854
	Afu2g02510	Afu2g02510 AspGDID:ASPL0000103081 COORDS:Chr2_A_fumigatus_Af293:642476-637850C, translated using codon table 1 (1435 amino acids) Uncharacterized ORF; Ortholog(s) have role in regulation of conjugation with cellular fusion and TORC1 complex, cytoplasm localization	12.9251	3.55	1	4	4	4	1435	161.407	7.38623
	Afu8g03880	Afu8g03880 AspGDID:ASPL0000110724 COORDS:Chr8_A_fumigatus_Af293:825050-828378W, translated using codon table 1 (1011 amino acids) Uncharacterized ORF; Putative alanyl-tRNA synthetase; protein induced by hydrogen peroxide	12.9095	5.04	1	4	4	4	1011	113.644	6.48096
	Afu8g05580	coaT AspGDID:ASPL0000110887 COORDS:Chr8_A_fumigatus_Af293:1308874-1310609W, translated using codon table 1 (525 amino acids) Uncharacterized ORF; Putative coenzyme A transferase; transcript induced by exposure to human airway epithelial cells	12.8954	9.33	1	3	3	3	525	58.1086	6.771
	Afu2g10070	Afu2g10070 AspGDID:ASPL0000103722 COORDS:Chr2_A_fumigatus_Af293:2576586-2580364W, translated using codon table 1 (1175 amino acids) Uncharacterized ORF; Putative carbamoyl-phosphate synthetase, large subunit	12.7947	6.21	1	5	6	6	1175	129.134	6.21436
	Afu3g10800	Afu3g10800 AspGDID:ASPL0000105478 COORDS:Chr3_A_fumigatus_Af293:2807176-2811179W, translated using codon table 1 (1310 amino acids) Uncharacterized ORF; Ortholog of <i>A. nidulans FGSC A4</i> : AN4908, <i>A. niger CBS 513.88</i> : An02g06530, <i>A. oryzae RIB40</i> : AO090003000629, <i>Aspergillus wentii</i> : Aspwe1_0036953 and <i>Aspergillus sydowii</i> : Aspsy1_0043015	12.7601	4.35	1	4	4	4	1310	145.89	7.09326
	Afu1g12250	rcfB AspGDID:ASPL0000102291 COORDS:Chr1_A_fumigatus_Af293:3235631-3234741C, translated using codon table 1 (268 amino acids) Uncharacterized ORF; Mitochondrial hypoxia response domain protein; protein and transcript levels downregulated by caspofungin treatmen	12.716	17.91	1	2	2	3	268	29.5042	8.85107
	Afu6g04180	Afu6g04180 AspGDID:ASPL0000108872 COORDS:Chr6_A_fumigatus_Af293:937642-938424W, translated using codon table 1 (242 amino acids) Uncharacterized ORF; Ortholog of <i>A. nidulans FGSC A4</i> : AN10835, <i>A. niger CBS 513.88</i> : An15g01400, <i>Neosartorya fischeri NRRL 181</i> : NFIA_050700, <i>Aspergillus wentii</i> : Aspwe1_0036032 and <i>Aspergillus versicolor</i> : Aspve1_0086107	12.6945	11.98	1	4	4	4	242	29.0928	11.1948
	Afu2g04700	Afu2g04700 AspGDID:ASPL0000103296 COORDS:Chr2_A_fumigatus_Af293:1283529-1287638W, translated using codon table 1 (1310 amino acids) Uncharacterized ORF; Ortholog(s) have role in cellular response to heat and cytosol, endoplasmic reticulum, nuclear outer membrane-endoplasmic reticulum membrane network localization	12.6127	3.82	1	3	3	4	1310	142.343	7.1958
	Afu7g05920	Afu7g05920 AspGDID:ASPL0000110284 COORDS:Chr7_A_fumigatus_Af293:1449832-1451264W, translated using codon table 1 (456 amino acids) Uncharacterized ORF; Ortholog(s) have stearoyl-CoA 9-desaturase activity	12.6121	5.7	1	2	2	3	456	51.8677	9.1001
	Afu1g09010	Afu1g09010 AspGDID:ASPL0000101967 COORDS:Chr1_A_fumigatus_Af293:2333751-2335765W, translated using codon table 1 (651 amino acids) Uncharacterized ORF; Ortholog(s) have cytosol localization	12.6037	8.6	1	4	4	5	651	72.8652	7.06396
	Afu8g03990	Afu8g03990 AspGDID:ASPL0000110734 COORDS:Chr8_A_fumigatus_Af293:855176-851942C, translated using codon table 1 (985 amino acids) Uncharacterized ORF; Ortholog(s) have U5 snRNP, cytosol, spliceosomal complex localization	12.5714	5.28	1	4	5	5	985	110.12	5.08447
	Afu1g14120	bfr1 AspGDID:ASPL0000102480 COORDS:Chr1_A_fumigatus_Af293:3774407-3776224W, translated using codon table 1 (510 amino acids) Uncharacterized ORF; Putative nuclear segregation protein	12.5435	9.61	1	4	4	5	510	57.388	9.12939
	Afu1g08840	Afu1g08840 AspGDID:ASPL0000101950 COORDS:Chr1_A_fumigatus_Af293:2290909-2291935W, translated using codon table 1 (228 amino acids) Uncharacterized ORF; Ortholog(s) have guanylate kinase activity, role in GMP metabolic process and cytoplasm, nucleus localization	12.5352	24.12	1	4	4	4	228	25.5231	7.43018
	Afu2g02280	Afu2g02280 AspGDID:ASPL0000103058 COORDS:Chr2_A_fumigatus_Af293:576409-576990W, translated using codon table 1 (170 amino acids) Uncharacterized ORF; Ortholog(s) have DASH complex localization	12.4131	27.06	1	3	3	3	170	19.206	9.59814
	Afu6g02750	egd1 AspGDID:ASPL0000108730 COORDS:Chr6_A_fumigatus_Af293:559767-558922C, translated using codon table 1 (186 amino acids) Uncharacterized ORF; Nascent polypeptide-associated complex (NAC) subunit beta; protein level decreases upon heat shock	12.4107	28.49	1	3	3	3	186	20.5334	5.43994
	Afu1g15140	Afu1g15140 AspGDID:ASPL0000102580 COORDS:Chr1_A_fumigatus_Af293:4071449-4070230C, translated using codon table 1 (323 amino acids) Uncharacterized ORF; Putative mitochondrial phosphate carrier protein; predicted gene pair with AFUA_1G02730	12.3997	13.62	1	4	4	4	323	33.8276	9.33447
	Afu6g03830	Afu6g03830 AspGDID:ASPL0000108838 COORDS:Chr6_A_fumigatus_Af293:842693-842009C, translated using codon table 1 (149 amino acids) Uncharacterized ORF; Ribosomal protein L14	12.3459	31.54	1	4	4	4	149	16.7334	10.2866
	Afu5g08310	Afu5g08310 AspGDID:ASPL0000107903 COORDS:Chr5_A_fumigatus_Af293:2110783-2111831W, translated using codon table 1 (334 amino acids) Uncharacterized ORF; Has domain(s) with predicted nucleic acid binding, nucleotide binding activity	12.3356	13.77	1	4	4	4	334	36.4593	6.82959
	Afu4g11340	lys9 AspGDID:ASPL0000106843 COORDS:Chr4_A_fumigatus_Af293:2978580-2976809C, translated using codon table 1 (450 amino acids) Uncharacterized ORF; Saccharopine dehydrogenase; hypoxia induced protein; transcript induced by exposure to human airway epithelial cells	12.3021	11.11	1	4	4	4	450	49.4183	6.27783
	Afu5g05490	Afu5g05490 AspGDID:ASPL0000107628 COORDS:Chr5_A_fumigatus_Af293:1274938-1276745W, translated using codon table 1 (474 amino acids) Uncharacterized ORF; Ortholog(s) have cytosol localization	12.2846	10.97	1	3	3	3	474	54.1563	6.43018
	Afu6g10700	Afu6g10700 AspGDID:ASPL0000109425 COORDS:Chr6_A_fumigatus_Af293:2643846-2644318W, translated using codon table 1 (122 amino acids) Uncharacterized ORF; Ortholog(s) have chaperone binding, unfolded protein binding activity, role in protein refolding and mitochondrial matrix localization	12.2358	37.7	1	4	4	4	122	13.3771	8.1626
	Afu2g04820	Afu2g04820 AspGDID:ASPL0000103307 COORDS:Chr2_A_fumigatus_Af293:1326025-1323818C, translated using codon table 1 (716 amino acids) Uncharacterized ORF; Putative translation release factor eRF3; transcript induced by exposure to human airway epithelial cells	12.2321	6.28	1	4	4	4	716	77.2757	8.04541
	Afu4g11330	Afu4g11330 AspGDID:ASPL0000106842 COORDS:Chr4_A_fumigatus_Af293:2975120-2976392W, translated using codon table 1 (379 amino acids) Uncharacterized ORF; Ortholog(s) have ATPase activator activity, chaperone binding activity, role in protein folding, response to stress and cytosol localization	12.0477	17.15	1	4	4	4	379	42.3297	6.03662
	Afu1g13710	Afu1g13710 AspGDID:ASPL0000102439 COORDS:Chr1_A_fumigatus_Af293:3650512-3647224C, translated using codon table 1 (1064 amino acids) Uncharacterized ORF; Isoleucyl-tRNA synthetase, cytoplasmic	11.9808	5.55	1	5	5	5	1064	122.315	6.43018
	Afu1g04900	Afu1g04900 AspGDID:ASPL0000101659 COORDS:Chr1_A_fumigatus_Af293:1389643-1388632C, translated using codon table 1 (258 amino acids) Uncharacterized ORF; Proliferating cell nuclear antigen (PCNA); conidia-enriched protein	11.9535	19.77	1	3	3	3	258	28.3053	4.71631
	Afu7g05210	Afu7g05210 AspGDID:ASPL0000110214 COORDS:Chr7_A_fumigatus_Af293:1231392-1229485C, translated using codon table 1 (581 amino acids) Uncharacterized ORF; Ortholog(s) have CTP synthase activity	11.8529	8.61	1	4	4	4	581	64.828	6.32861
	Afu3g06070	Afu3g06070 AspGDID:ASPL0000105018 COORDS:Chr3_A_fumigatus_Af293:1494205-1495397W, translated using codon table 1 (206 amino acids) Uncharacterized ORF; Histone H1; transcript up-regulated in conidia exposed to neutrophils	11.7992	14.08	1	2	2	3	206	21.444	10.5503
	Afu7g05370	aspB AspGDID:ASPL0000110230 COORDS:Chr7_A_fumigatus_Af293:1290537-1292385W, translated using codon table 1 (463 amino acids) Verified ORF; Putative septin; Yap1-dependent induction in response to hydrogen peroxide; localizes to septa and to rings at the base of developing phialides; hypoxia repressed protein	11.692	13.61	1	3	4	4	463	52.5207	6.97607
	Afu5g06280	Afu5g06280 AspGDID:ASPL0000107704 COORDS:Chr5_A_fumigatus_Af293:1509072-1507439C, translated using codon table 1 (508 amino acids) Uncharacterized ORF; Has domain(s) with predicted DNA binding, DNA-directed RNA polymerase activity, role in transcription, DNA-templated and nucleus localization	11.6514	9.06	1	4	4	4	508	55.332	9.48096
	Afu1g12670	Afu1g12670 AspGDID:ASPL0000102335 COORDS:Chr1_A_fumigatus_Af293:3345404-3346860W, translated using codon table 1 (426 amino acids) Uncharacterized ORF; Ortholog(s) have role in ascospore formation, cellular protein localization, cellular response to cadmium ion, detoxification of cadmium ion, meiotic chromosome segregation and DASH complex, cytosol, mitotic spindle pole body localization	11.6512	9.15	1	2	2	2	426	47.2871	5.2876
	Afu3g06100	Afu3g06100 AspGDID:ASPL0000105021 COORDS:Chr3_A_fumigatus_Af293:1506560-1505423C, translated using codon table 1 (277 amino acids) Uncharacterized ORF; Has domain(s) with predicted role in attachment of spindle microtubules to kinetochore, mitotic spindle organization in nucleus and DASH complex, spindle microtubule localization	11.6426	15.88	1	3	3	3	277	31.2697	5.89697
	Afu5g03050	Afu5g03050 AspGDID:ASPL0000107484 COORDS:Chr5_A_fumigatus_Af293:823582-825525W, translated using codon table 1 (579 amino acids) Uncharacterized ORF; Ortholog(s) have role in mRNA cis splicing, via spliceosome and Prp19 complex, mitotic spindle pole body, spliceosomal complex localization	11.6032	8.12	1	3	3	3	579	65.0311	9.36377
	Afu2g11770	Afu2g11770 AspGDID:ASPL0000103891 COORDS:Chr2_A_fumigatus_Af293:3025736-3024850C, translated using codon table 1 (228 amino acids) Uncharacterized ORF; Ortholog of <i>A. nidulans FGSC A4</i> : AN6196, <i>A. niger CBS 513.88</i> : An02g03790, <i>A. oryzae RIB40</i> : AO090026000469, <i>Aspergillus wentii</i> : Aspwe1_0031226 and <i>Aspergillus sydowii</i> : Aspsy1_0045308	11.597	21.49	1	4	4	4	228	24.9297	10.1841
	Afu5g02750	Afu5g02750 AspGDID:ASPL0000107455 COORDS:Chr5_A_fumigatus_Af293:720857-719993C, translated using codon table 1 (158 amino acids) Uncharacterized ORF; Cytochrome c oxidase subunit Va with a predicted role in oxidative phosphorylation; induced by exposure to artemisinin	11.5117	28.48	1	3	3	3	158	17.9802	5.68115
	Afu3g10310	Afu3g10310 AspGDID:ASPL0000105429 COORDS:Chr3_A_fumigatus_Af293:2671052-2673496W, translated using codon table 1 (743 amino acids) Uncharacterized ORF; Ortholog(s) have acetolactate synthase activity, flavin adenine dinucleotide binding activity, role in isoleucine biosynthetic process, valine biosynthetic process and acetolactate synthase complex, mitochondrion localization	11.2765	7.54	1	4	4	4	743	81.4649	8.54346
	Afu6g07540	Afu6g07540 AspGDID:ASPL0000109114 COORDS:Chr6_A_fumigatus_Af293:1715811-1713540C, translated using codon table 1 (548 amino acids) Uncharacterized ORF; Ortholog(s) have chaperonin-containing T-complex localization	11.2714	10.04	1	4	4	4	548	59.8493	5.51611
	Afu6g03730	Afu6g03730 AspGDID:ASPL0000108828 COORDS:Chr6_A_fumigatus_Af293:823850-821958C, translated using codon table 1 (558 amino acids) Uncharacterized ORF; 2-methylcitrate dehydratase; hypoxia repressed protein; transcript up-regulated in conidia exposed to neutrophils and to human airway epithelial cells; no human homolog	11.214	8.24	1	3	3	3	558	62.0658	8.36768
	Afu3g08470	Afu3g08470 AspGDID:ASPL0000105250 COORDS:Chr3_A_fumigatus_Af293:2171618-2174019W, translated using codon table 1 (511 amino acids) Verified ORF; Glucose-6-phosphate 1-dehydrogenase	11.1855	9.59	1	4	4	4	511	58.8991	7.00537
	Afu7g02180	Afu7g02180 AspGDID:ASPL0000110013 COORDS:Chr7_A_fumigatus_Af293:584569-586235W, translated using codon table 1 (509 amino acids) Uncharacterized ORF; Ortholog(s) have UDP-N-acetylglucosamine diphosphorylase activity, role in UDP-N-acetylglucosamine biosynthetic process and cytosol, nucleus localization	11.127	8.64	1	4	4	4	509	56.6802	6.1001
	Afu3g11390	Afu3g11390 AspGDID:ASPL0000105537 COORDS:Chr3_A_fumigatus_Af293:2988245-2989876W, translated using codon table 1 (465 amino acids) Uncharacterized ORF; Ortholog(s) have role in positive regulation of RNA polymerase II transcriptional preinitiation complex assembly, proteasome regulatory particle assembly, ubiquitin-dependent protein catabolic process	11.122	9.25	1	3	3	4	465	51.5677	5.30029
	Afu1g15620	helA AspGDID:ASPL0000102625 COORDS:Chr1_A_fumigatus_Af293:4219329-4221360W, translated using codon table 1 (655 amino acids) Uncharacterized ORF; Putative DEAD box RNA helicase; protein induced by heat shock	11.1136	9.01	1	5	5	5	655	73.8855	9.86182
	Afu4g00610	Afu4g00610 AspGDID:ASPL0000105980 COORDS:Chr4_A_fumigatus_Af293:166314-168179W, translated using codon table 1 (601 amino acids) Uncharacterized ORF; Putative aryl-alcohol dehydrogenase	11.0983	8.49	1	3	3	3	601	65.2895	5.51611
	Afu1g11480	Afu1g11480 AspGDID:ASPL0000102211 COORDS:Chr1_A_fumigatus_Af293:3031787-3030921C, translated using codon table 1 (168 amino acids) Uncharacterized ORF; Protein of unknown function; transcript up-regulated in conidia exposed to neutrophils	11.0107	21.43	1	2	2	3	168	18.216	5.52881
	Afu4g12190	Afu4g12190 AspGDID:ASPL0000106926 COORDS:Chr4_A_fumigatus_Af293:3200956-3199556C, translated using codon table 1 (400 amino acids) Uncharacterized ORF; Ortholog of <i>A. nidulans FGSC A4</i> : AN3651, <i>A. niger CBS 513.88</i> : An01g07460, <i>Aspergillus wentii</i> : Aspwe1_0055907, <i>Aspergillus sydowii</i> : Aspsy1_0154768 and <i>Aspergillus terreus NIH2624</i> : ATET_03105	10.9792	12.5	1	4	4	4	400	42.3369	7.1665
	Afu3g11260	Afu3g11260 AspGDID:ASPL0000105524 COORDS:Chr3_A_fumigatus_Af293:2951140-2951715W, translated using codon table 1 (154 amino acids) Uncharacterized ORF; Ubiquitin	10.8592	18.83	1	3	3	4	154	17.6615	9.77393
	Afu5g13865	Afu5g13865 AspGDID:ASPL0000408407 COORDS:Chr5_A_fumigatus_Af293:3639676-3637668C, translated using codon table 1 (252 amino acids) Uncharacterized ORF; Ortholog(s) have ATP-dependent RNA helicase inhibitor activity, RNA binding activity	10.8395	16.67	1	3	3	3	252	26.1878	10.3452
	Afu1g03610	Afu1g03610 AspGDID:ASPL0000101531 COORDS:Chr1_A_fumigatus_Af293:1043356-1044333W, translated using codon table 1 (282 amino acids) Uncharacterized ORF; Protein of unknown function; calcium downregulated	10.8291	17.38	1	3	3	3	282	32.0804	7.43018
	Afu7g05720	Afu7g05720 AspGDID:ASPL0000110264 COORDS:Chr7_A_fumigatus_Af293:1398605-1400277W, translated using codon table 1 (485 amino acids) Uncharacterized ORF; Pyruvate dehydrogenase complex, dihydrolipoamide acetyltransferase component; hypoxia induced protein	10.7909	7.42	1	3	3	3	485	51.9993	6.68311
	Afu4g13390	Afu4g13390 AspGDID:ASPL0000107045 COORDS:Chr4_A_fumigatus_Af293:3509311-3508055C, translated using codon table 1 (381 amino acids) Uncharacterized ORF; Ortholog(s) have role in conidiophore development, conidium formation, hyphal growth, nuclear migration along microtubule, regulation of growth rate and cytoplasmic dynein complex, hyphal tip localization	10.7743	10.24	1	2	2	2	381	43.0934	6.72705
	Afu4g04330	Afu4g04330 AspGDID:ASPL0000106250 COORDS:Chr4_A_fumigatus_Af293:1230960-1228554C, translated using codon table 1 (673 amino acids) Uncharacterized ORF; Ortholog(s) have nucleus localization	10.7669	9.81	1	3	3	3	673	75.6083	5.38916
	Afu1g02030	Afu1g02030 AspGDID:ASPL0000101373 COORDS:Chr1_A_fumigatus_Af293:600839-603263W, translated using codon table 1 (740 amino acids) Uncharacterized ORF; Putative eukaryotic translation initiation factor 3 subunit; protein induced by heat shock	10.7222	7.03	1	4	4	4	740	84.4348	5.35107
	Afu8g04960	Afu8g04960 AspGDID:ASPL0000110829 COORDS:Chr8_A_fumigatus_Af293:1146387-1145918C, translated using codon table 1 (78 amino acids) Uncharacterized ORF; Ortholog(s) have role in mRNA splicing, via spliceosome and U1 snRNP, U2 snRNP, U2-type prespliceosome, U4/U6 x U5 tri-snRNP complex, U5 snRNP, cytosol localization	10.7129	33.33	1	2	2	3	78	8.86665	8.1333
	Afu1g10510	Afu1g10510 AspGDID:ASPL0000102115 COORDS:Chr1_A_fumigatus_Af293:2736183-2737182W, translated using codon table 1 (186 amino acids) Uncharacterized ORF; 60S ribosomal protein L35	10.6516	16.13	1	4	4	4	186	21.1727	10.7407
	Afu3g08840	Afu3g08840 AspGDID:ASPL0000105285 COORDS:Chr3_A_fumigatus_Af293:2262208-2266262W, translated using codon table 1 (1212 amino acids) Uncharacterized ORF; Ortholog(s) have role in hyphal growth, nuclear division and Golgi apparatus, hyphal tip localization	10.5841	4.21	1	2	2	2	1212	135.784	6.27783
	Afu4g11080	facA AspGDID:ASPL0000106818 COORDS:Chr4_A_fumigatus_Af293:2893854-2891549C, translated using codon table 1 (670 amino acids) Uncharacterized ORF; Putative acetyl-coenzyme A synthetase with a predicted role in acetate metabolism; transcript up-regulated in conidia exposed to neutrophils; protein induced by heat shock; hypoxia repressed protein	10.5307	7.16	1	4	4	4	670	74.4038	6.44287
	Afu1g03510	Afu1g03510 AspGDID:ASPL0000101521 COORDS:Chr1_A_fumigatus_Af293:1014395-1015676W, translated using codon table 1 (297 amino acids) Uncharacterized ORF; ATP Synthase gamma chain, mitochondrial precursor	10.5302	13.13	1	3	3	3	297	32.3556	8.20654
	Afu1g15010	Afu1g15010 AspGDID:ASPL0000102568 COORDS:Chr1_A_fumigatus_Af293:4038436-4032478C, translated using codon table 1 (1861 amino acids) Uncharacterized ORF; Ortholog(s) have cell division site, spindle localization	10.4202	2.53	1	4	4	4	1861	205.445	6.20166
	Afu3g10260	Afu3g10260 AspGDID:ASPL0000105424 COORDS:Chr3_A_fumigatus_Af293:2657873-2657044C, translated using codon table 1 (255 amino acids) Uncharacterized ORF; Has domain(s) with predicted role in mitotic nuclear division, mitotic spindle organization in nucleus and DASH complex, mitotic spindle localization	10.3881	10.59	1	2	2	3	255	28.2642	9.92041
	Afu1g03400	Afu1g03400 AspGDID:ASPL0000101510 COORDS:Chr1_A_fumigatus_Af293:991451-988800C, translated using codon table 1 (769 amino acids) Uncharacterized ORF; Ortholog(s) have cytoplasm localization	10.3248	7.67	1	4	4	5	769	85.4021	6.29053
	Afu8g07130	Afu8g07130 AspGDID:ASPL0000111039 COORDS:Chr8_A_fumigatus_Af293:1747018-1747937W, translated using codon table 1 (267 amino acids) Verified ORF; AhpC/TSA family thioredoxin peroxidase; conidia-enriched protein; transcript up-regulated in conidia exposed to neutrophils and to human airway epithelial cells	10.2173	17.6	1	3	3	3	267	29.5877	9.24658
	Afu3g09620	Afu3g09620 AspGDID:ASPL0000105360 COORDS:Chr3_A_fumigatus_Af293:2444571-2447761W, translated using codon table 1 (1003 amino acids) Uncharacterized ORF; Has domain(s) with predicted nucleic acid binding, nucleotide binding activity	10.197	4.39	1	3	3	3	1003	110.346	6.44287
	Afu1g07380	Afu1g07380 AspGDID:ASPL0000101904 COORDS:Chr1_A_fumigatus_Af293:2090929-2084331C, translated using codon table 1 (2126 amino acids) Uncharacterized ORF; Putative NADH-dependent glutamate synthase; transcript induced during conidial germination; transcript up-regulated in conidia exposed to neutrophils; SrbA-regulated during hypoxia	10.0767	1.88	1	3	3	3	2126	234.143	6.39209
	Afu2g10380	Afu2g10380 AspGDID:ASPL0000103753 COORDS:Chr2_A_fumigatus_Af293:2657604-2656030C, translated using codon table 1 (476 amino acids) Uncharacterized ORF; Has domain(s) with predicted translation initiation factor activity and eukaryotic translation initiation factor 3 complex localization	10.0725	7.77	1	3	3	3	476	54.6692	5.33838
	Afu5g01990	Afu5g01990 AspGDID:ASPL0000107379 COORDS:Chr5_A_fumigatus_Af293:511005-511475W, translated using codon table 1 (156 amino acids) Uncharacterized ORF; BYS1 domain protein	10.0659	22.44	1	2	2	3	156	16.0158	5.08447
	Afu7g01480	Afu7g01480 AspGDID:ASPL0000109943 COORDS:Chr7_A_fumigatus_Af293:382905-383774W, translated using codon table 1 (249 amino acids) Uncharacterized ORF; Ortholog(s) have translation initiation factor activity, role in translational initiation and cytosol, nucleus localization	10.0335	22.09	1	5	5	5	249	27.973	5.99854
	Afu3g12530	pkhB AspGDID:ASPL0000105649 COORDS:Chr3_A_fumigatus_Af293:3318837-3312900C, translated using codon table 1 (1937 amino acids) Uncharacterized ORF; Putative sensor histidine kinase/response regulator; transcript induced by exposure to human airway epithelial cells	9.99153	3.51	1	4	4	4	1937	213.382	6.52197
	Afu2g07680	sidA AspGDID:ASPL0000103489 COORDS:Chr2_A_fumigatus_Af293:1961124-1959561C, translated using codon table 1 (501 amino acids) Verified ORF; L-ornithine N5-oxygenase; first committed step in siderophore biosynthesis; essential for virulence; induced by exposure to human airway epithelial cells; expression up-regulated by iron starvation; activated by L-arginine; SrbA-regulated	9.98752	8.78	1	3	3	3	501	56.841	8.6167
	Afu3g01110	gua1 AspGDID:ASPL0000104631 COORDS:Chr3_A_fumigatus_Af293:261096-258836C, translated using codon table 1 (539 amino acids) Uncharacterized ORF; Putative GMP synthase ([glutamine-hydrolyzing); Yap1-dependent induction in response to hydrogen peroxide	9.95048	8.16	1	3	3	3	539	59.4337	6.26514
	Afu6g07170	Afu6g07170 AspGDID:ASPL0000109079 COORDS:Chr6_A_fumigatus_Af293:1608838-1609615W, translated using codon table 1 (212 amino acids) Uncharacterized ORF; Putative transcription factor	9.89314	18.87	1	2	2	2	212	24.4508	6.17627
	Afu3g07680	Afu3g07680 AspGDID:ASPL0000105174 COORDS:Chr3_A_fumigatus_Af293:1941416-1940148C, translated using codon table 1 (422 amino acids) Uncharacterized ORF; Putative ran GTPase activating protein	9.88146	11.85	1	3	3	3	422	46.1998	4.67822
	Afu7g03980	Afu7g03980 AspGDID:ASPL0000110093 COORDS:Chr7_A_fumigatus_Af293:893752-895260W, translated using codon table 1 (468 amino acids) Uncharacterized ORF; Ortholog(s) have role in translational initiation and cytosol, eukaryotic 43S preinitiation complex, eukaryotic translation initiation factor 3 complex, eIF3m, nucleus localization	9.83324	11.11	1	3	3	3	468	51.0816	5.05908
	Afu2g02590	Afu2g02590 AspGDID:ASPL0000103089 COORDS:Chr2_A_fumigatus_Af293:666730-668457W, translated using codon table 1 (555 amino acids) Uncharacterized ORF; Aspartyl-tRNA synthetase	9.73098	6.31	1	3	3	3	555	61.5887	6.32861
	Afu1g10310	Afu1g10310 AspGDID:ASPL0000102095 COORDS:Chr1_A_fumigatus_Af293:2655644-2657900W, translated using codon table 1 (604 amino acids) Uncharacterized ORF; Putative RNase L inhibitor of the ABC superfamily	9.71548	7.28	1	3	3	3	604	68.1972	8.23584
	Afu2g13040	grpE AspGDID:ASPL0000104018 COORDS:Chr2_A_fumigatus_Af293:3347479-3346582C, translated using codon table 1 (250 amino acids) Uncharacterized ORF; Mitochondrial co-chaperone; protein level decreases upon heat shock	9.65057	14	1	3	3	3	250	28.3728	8.25049
	Afu6g12660	Afu6g12660 AspGDID:ASPL0000109609 COORDS:Chr6_A_fumigatus_Af293:3198955-3199723W, translated using codon table 1 (155 amino acids) Uncharacterized ORF; 40S ribosomal protein S10b; protein level decreases upon heat shock	9.56785	14.84	1	2	2	3	155	17.8492	9.72998
	Afu4g12920	Afu4g12920 AspGDID:ASPL0000106998 COORDS:Chr4_A_fumigatus_Af293:3384591-3386472W, translated using codon table 1 (604 amino acids) Uncharacterized ORF; Putative mitochondrial histidyl-tRNA synthetase; protein induced by heat shock	9.53446	6.46	1	3	3	3	604	66.6164	7.13721
	Afu6g03810	Afu6g03810 AspGDID:ASPL0000108836 COORDS:Chr6_A_fumigatus_Af293:840093-839212C, translated using codon table 1 (255 amino acids) Uncharacterized ORF; Putative mitochondrial ATP synthase D chain; hypoxia induced protein	9.50276	16.86	1	4	4	4	255	28.6782	9.0415
	Afu3g09030	Afu3g09030 AspGDID:ASPL0000105302 COORDS:Chr3_A_fumigatus_Af293:2303487-2302210C, translated using codon table 1 (310 amino acids) Uncharacterized ORF; Ortholog(s) have role in aerobic respiration, penicillin biosynthetic process and mitochondrial matrix localization	9.49316	12.26	1	2	2	2	310	34.8563	4.65283
	Afu2g14970	Afu2g14970 AspGDID:ASPL0000104212 COORDS:Chr2_A_fumigatus_Af293:3944757-3943306C, translated using codon table 1 (483 amino acids) Uncharacterized ORF; Gamma-butyrobetaine hydroxylase subfamily protein	9.45268	8.07	1	4	4	4	483	56.6704	8.29443
	Afu4g09740	Afu4g09740 AspGDID:ASPL0000106688 COORDS:Chr4_A_fumigatus_Af293:2536684-2538622W, translated using codon table 1 (567 amino acids) Uncharacterized ORF; Ortholog(s) have unfolded protein binding activity	9.45118	7.94	1	3	3	3	567	61.363	5.2876
	Afu2g05950	Afu2g05950 AspGDID:ASPL0000103418 COORDS:Chr2_A_fumigatus_Af293:1671741-1671187C, translated using codon table 1 (126 amino acids) Uncharacterized ORF; Ortholog(s) have RNA binding activity and role in mRNA splicing, via spliceosome, maturation of SSU-rRNA from tricistronic rRNA transcript (SSU-rRNA, 5.8S rRNA, LSU-rRNA)	9.44497	30.16	1	2	2	2	126	13.6013	7.34229
	Afu5g07050	Afu5g07050 AspGDID:ASPL0000107780 COORDS:Chr5_A_fumigatus_Af293:1745205-1746800W, translated using codon table 1 (463 amino acids) Uncharacterized ORF; Proteasome regulatory particle subunit; transcript induced by exposure to human airway epithelial cells	9.41661	7.99	1	3	3	3	463	51.4175	5.75732
	Afu1g06960	Afu1g06960 AspGDID:ASPL0000101864 COORDS:Chr1_A_fumigatus_Af293:1985804-1987045W, translated using codon table 1 (370 amino acids) Uncharacterized ORF; Putative pyruvate dehydrogenase complex subunit alpha; protein induced by hydrogen peroxide; hypoxia induced protein	9.36247	11.08	1	4	4	4	370	41.4525	6.80029
	Afu1g13090	Afu1g13090 AspGDID:ASPL0000102377 COORDS:Chr1_A_fumigatus_Af293:3472871-3470577C, translated using codon table 1 (764 amino acids) Uncharacterized ORF; Ortholog(s) have anthranilate synthase activity, glyceraldehyde-3-phosphate dehydrogenase (NAD+) (phosphorylating) activity, indole-3-glycerol-phosphate synthase activity, phosphoribosylanthranilate isomerase activity	9.35356	6.81	1	4	4	4	764	82.1806	6.34131
	Afu1g09030	Afu1g09030 AspGDID:ASPL0000101969 COORDS:Chr1_A_fumigatus_Af293:2341463-2342225W, translated using codon table 1 (144 amino acids) Uncharacterized ORF; Protein of unknown function; calcium downregulated; transcript up-regulated in conidia exposed to neutrophils	9.3329	23.61	1	3	3	3	144	16.1765	8.04541
	Afu1g11420	Afu1g11420 AspGDID:ASPL0000102205 COORDS:Chr1_A_fumigatus_Af293:3010805-3006406C, translated using codon table 1 (1378 amino acids) Uncharacterized ORF; Ortholog(s) have mRNA 5'-UTR binding, translation repressor activity, nucleic acid binding activity	9.30293	2.25	1	3	3	3	1378	152.19	7.56201
	Afu5g08130	Afu5g08130 AspGDID:ASPL0000107885 COORDS:Chr5_A_fumigatus_Af293:2058746-2057023C, translated using codon table 1 (478 amino acids) Uncharacterized ORF; Ortholog(s) have P-P-bond-hydrolysis-driven protein transmembrane transporter activity, peptide transporter activity, signal sequence binding activity	9.22192	7.74	1	3	3	3	478	52.1877	8.19189
	Afu2g12980	Afu2g12980 AspGDID:ASPL0000104011 COORDS:Chr2_A_fumigatus_Af293:3335985-3331790C, translated using codon table 1 (1263 amino acids) Uncharacterized ORF; Putative protein transport protein; transcript downregulated in response to amphotericin B	9.18873	3.4	1	3	3	3	1263	136.688	6.72705
	Afu5g13930	Afu5g13930 AspGDID:ASPL0000108444 COORDS:Chr5_A_fumigatus_Af293:3645629-3646879W, translated using codon table 1 (354 amino acids) Uncharacterized ORF; Ortholog(s) have role in cytoplasmic translation and cytoplasm, polysomal ribosome localization	9.09397	9.6	1	3	3	3	354	40.1326	8.90967
	Afu1g05130	Afu1g05130 AspGDID:ASPL0000101682 COORDS:Chr1_A_fumigatus_Af293:1468615-1464920C, translated using codon table 1 (1170 amino acids) Uncharacterized ORF; Has domain(s) with predicted phospholipid binding activity	9.01881	3.08	1	3	3	3	1170	129.377	8.85107
	Afu7g05070	frdA AspGDID:ASPL0000110199 COORDS:Chr7_A_fumigatus_Af293:1197069-1195618C, translated using codon table 1 (483 amino acids) Uncharacterized ORF; Putative FAD-dependent oxidoreductase; immunoreactive protein	8.9993	6.42	1	3	3	3	483	51.2359	6.0874
	Afu2g16880	Afu2g16880 AspGDID:ASPL0000104407 COORDS:Chr2_A_fumigatus_Af293:4516963-4516332C, translated using codon table 1 (92 amino acids) Uncharacterized ORF; 60S ribosomal protein L37a	8.96647	38.04	1	3	3	3	92	10.1494	10.4478
	Afu3g11170	Afu3g11170 AspGDID:ASPL0000105515 COORDS:Chr3_A_fumigatus_Af293:2928974-2931529W, translated using codon table 1 (759 amino acids) Uncharacterized ORF; Ortholog(s) have sequence-specific DNA binding activity and role in carotenoid biosynthetic process, circadian rhythm, conidiophore development	8.96591	5.14	1	3	3	3	759	84.1513	6.7124
	Afu7g05470	Afu7g05470 AspGDID:ASPL0000110240 COORDS:Chr7_A_fumigatus_Af293:1320985-1322187W, translated using codon table 1 (352 amino acids) Uncharacterized ORF; Putative electron transfer flavoprotein alpha subunit; transcript induced by exposure to human airway epithelial cells; induced by exposure to artemisinin	8.96429	15.91	1	3	3	3	352	36.6673	6.27783
	Afu4g07435	Afu4g07435 AspGDID:ASPL0000106458 COORDS:Chr4_A_fumigatus_Af293:1932665-1931582C, translated using codon table 1 (166 amino acids) Uncharacterized ORF; 60S ribosomal protein L36	8.93249	15.66	1	3	3	3	166	18.9943	11.9126
	Afu6g13450	Afu6g13450 AspGDID:ASPL0000109686 COORDS:Chr6_A_fumigatus_Af293:3425195-3426603W, translated using codon table 1 (419 amino acids) Uncharacterized ORF; Has domain(s) with predicted hydrolase activity, acting on carbon-nitrogen (but not peptide) bonds activity and role in nitrogen compound metabolic process	8.92444	15.27	1	3	3	3	419	45.1227	6.25244
	Afu3g12490	Afu3g12490 AspGDID:ASPL0000105645 COORDS:Chr3_A_fumigatus_Af293:3299203-3301076W, translated using codon table 1 (574 amino acids) Uncharacterized ORF; Ortholog(s) have histone-arginine N-methyltransferase activity, ribosome binding activity and role in peptidyl-arginine methylation, to asymmetrical-dimethyl arginine, ribosome biogenesis	8.80775	6.97	1	2	2	2	574	64.4448	4.89404
	Afu2g07810	Afu2g07810 AspGDID:ASPL0000103501 COORDS:Chr2_A_fumigatus_Af293:1998025-1999850W, translated using codon table 1 (537 amino acids) Uncharacterized ORF; Putative cytosolic hydroxymethyltransferase	8.79361	6.7	1	2	3	3	537	58.7963	8.85107
	Afu5g11000	Afu5g11000 AspGDID:ASPL0000108160 COORDS:Chr5_A_fumigatus_Af293:2817960-2816944C, translated using codon table 1 (253 amino acids) Uncharacterized ORF; Ortholog(s) have U2 snRNP, cytosol localization	8.74615	14.23	1	3	3	3	253	28.7853	8.29443
	Afu1g15200	Afu1g15200 AspGDID:ASPL0000102586 COORDS:Chr1_A_fumigatus_Af293:4091379-4088983C, translated using codon table 1 (724 amino acids) Uncharacterized ORF; Ortholog of <i>A. nidulans FGSC A4</i> : AN3519, AN2646, AN0587, AN0866, AN7370 and <i>A. fumigatus Af293</i> : Afu3g03790, Afu4g14040, Afu5g06900, Afu7g08575	8.73336	4.7	1	3	3	3	724	79.9826	7.79639
	Afu4g12870	Afu4g12870 AspGDID:ASPL0000106993 COORDS:Chr4_A_fumigatus_Af293:3368445-3370387W, translated using codon table 1 (602 amino acids) Uncharacterized ORF; Putative methylmalonate-semialdehyde dehydrogenase; transcript up-regulated in conidia exposed to neutrophils	8.70491	5.32	1	3	3	3	602	63.8246	8.03076
	Afu6g12600	Afu6g12600 AspGDID:ASPL0000109603 COORDS:Chr6_A_fumigatus_Af293:3185640-3183146C, translated using codon table 1 (704 amino acids) Uncharacterized ORF; Ortholog of <i>A. nidulans FGSC A4</i> : AN3693, <i>A. niger CBS 513.88</i> : An06g01780, <i>A. oryzae RIB40</i> : AO090003000373, <i>Aspergillus wentii</i> : Aspwe1_0203403 and <i>Aspergillus sydowii</i> : Aspsy1_0892534	8.70264	5.4	1	3	3	3	704	76.2054	5.5542
	Afu6g08070	Afu6g08070 AspGDID:ASPL0000109167 COORDS:Chr6_A_fumigatus_Af293:1871238-1872190W, translated using codon table 1 (259 amino acids) Uncharacterized ORF; Ortholog(s) have role in RNA metabolic process and cytoplasmic stress granule, nucleus, ribosome localization	8.67288	19.69	1	2	2	2	259	26.6918	9.65674
	Afu1g05620	Afu1g05620 AspGDID:ASPL0000101730 COORDS:Chr1_A_fumigatus_Af293:1613252-1615558W, translated using codon table 1 (600 amino acids) Uncharacterized ORF; Ortholog(s) have phenylalanine-tRNA ligase activity, role in cellular response to drug, phenylalanyl-tRNA aminoacylation and cytosol, nucleus, phenylalanine-tRNA ligase complex localization	8.59606	6	1	3	3	3	600	67.8031	5.68115
	Afu3g11430	Afu3g11430 AspGDID:ASPL0000105541 COORDS:Chr3_A_fumigatus_Af293:2998674-2997540C, translated using codon table 1 (324 amino acids) Uncharacterized ORF; Putative arginase; SrbA-regulated during hypoxia	8.52637	9.57	1	2	2	2	324	35.42	5.87158
	Afu1g15720	Afu1g15720 AspGDID:ASPL0000102635 COORDS:Chr1_A_fumigatus_Af293:4249956-4253073W, translated using codon table 1 (872 amino acids) Uncharacterized ORF; Ortholog(s) have role in cell division and nuclear membrane localization	8.48133	4.36	1	3	3	4	872	96.2482	4.76709
	Afu7g02340	Afu7g02340 AspGDID:ASPL0000110029 COORDS:Chr7_A_fumigatus_Af293:635304-636088W, translated using codon table 1 (168 amino acids) Uncharacterized ORF; Ortholog(s) have role in isoleucine biosynthetic process, mitochondrial translation and mitochondrial matrix localization	8.47775	25	1	4	4	4	168	18.0041	8.82178
	Afu6g05120	Afu6g05120 AspGDID:ASPL0000108967 COORDS:Chr6_A_fumigatus_Af293:1221763-1223363W, translated using codon table 1 (394 amino acids) Uncharacterized ORF; Ortholog(s) have protein serine/threonine kinase activity, role in activation of bipolar cell growth, protein phosphorylation, regulation of cytokinesis, regulation of mitotic sister chromatid segregation and cytosol, nucleus localization	8.47031	7.61	1	2	2	2	394	45.0592	8.36768
	Afu3g13820	Afu3g13820 AspGDID:ASPL0000105775 COORDS:Chr3_A_fumigatus_Af293:3651038-3650223C, translated using codon table 1 (201 amino acids) Uncharacterized ORF; Putative HET-C2 protein; transcript induced by exposure to human airway epithelial cells	8.37134	14.93	1	3	3	3	201	22.1986	6.94678
	Afu5g06320	Afu5g06320 AspGDID:ASPL0000107708 COORDS:Chr5_A_fumigatus_Af293:1519087-1518035C, translated using codon table 1 (169 amino acids) Uncharacterized ORF; Ortholog(s) have role in cellular protein localization, cytokinesis, site selection, endoplasmic reticulum inheritance, endoplasmic reticulum tubular network organization, nuclear pore complex assembly, vesicle-mediated transport	8.33308	18.34	1	3	3	3	169	19.0569	8.33838
	Afu4g06890	cyp51A AspGDID:ASPL0000106403 COORDS:Chr4_A_fumigatus_Af293:1785331-1783713C, translated using codon table 1 (515 amino acids) Verified ORF; 14-alpha sterol demethylase; commonly mutated in drug resistant isolates; putative ortholog of A. nidulans pdmA; transcript induced by exposure to fluconazole and voriconazole; SrbA-regulated during hypoxia	8.32229	7.77	1	2	2	2	515	58.0308	8.52881
	Afu3g06610	Afu3g06610 AspGDID:ASPL0000105072 COORDS:Chr3_A_fumigatus_Af293:1639448-1641145W, translated using codon table 1 (508 amino acids) Uncharacterized ORF; Proteasome regulatory particle subunit; transcript induced by exposure to human airway epithelial cells	8.31406	5.91	1	3	3	3	508	58.4077	7.18115
	Afu3g10200	Afu3g10200 AspGDID:ASPL0000105418 COORDS:Chr3_A_fumigatus_Af293:2633724-2635031W, translated using codon table 1 (371 amino acids) Uncharacterized ORF; Ortholog of <i>A. nidulans FGSC A4</i> : AN10620, <i>A. oryzae RIB40</i> : AO090003000556, <i>Aspergillus wentii</i> : Aspwe1_0025004, <i>Aspergillus zonatus</i> : Aspzo1_0012301 and <i>Aspergillus sydowii</i> : Aspsy1_0146861	8.25806	10.51	1	3	3	3	371	43.3827	9.39307
	Afu6g07640	Afu6g07640 AspGDID:ASPL0000109124 COORDS:Chr6_A_fumigatus_Af293:1735592-1737557W, translated using codon table 1 (604 amino acids) Uncharacterized ORF; Has domain(s) with predicted ATP binding, aminoacyl-tRNA ligase activity, lysine-tRNA ligase activity, nucleic acid binding activity, role in lysyl-tRNA aminoacylation, tRNA aminoacylation for protein translation and cytoplasm localization	8.22576	5.63	1	3	3	3	604	68.9187	6.06201
	Afu6g04730	Afu6g04730 AspGDID:ASPL0000108927 COORDS:Chr6_A_fumigatus_Af293:1109697-1112290W, translated using codon table 1 (817 amino acids) Uncharacterized ORF; Ortholog(s) have phosphoribosylamine-glycine ligase activity, phosphoribosylformylglycinamidine cyclo-ligase activity	8.14941	4.53	1	2	2	2	817	86.3647	5.50342
	Afu2g10030	Afu2g10030 AspGDID:ASPL0000103718 COORDS:Chr2_A_fumigatus_Af293:2570628-2569665C, translated using codon table 1 (265 amino acids) Uncharacterized ORF; Immunoreactive protein; calcium induced; transcript induced by exposure to human airway epithelial cells; induced by gliotoxin exposure	8.09276	13.58	1	3	3	3	265	28.2482	6.3667
	Afu6g03440	Afu6g03440 AspGDID:ASPL0000108799 COORDS:Chr6_A_fumigatus_Af293:738342-736781C, translated using codon table 1 (497 amino acids) Uncharacterized ORF; Putative fructosyl amine; transcript induced by voriconazole	8.06694	8.05	1	3	3	3	497	54.895	5.75732
	Afu1g14500	Afu1g14500 AspGDID:ASPL0000102517 COORDS:Chr1_A_fumigatus_Af293:3873044-3876421W, translated using codon table 1 (951 amino acids) Uncharacterized ORF; Ortholog of <i>A. nidulans FGSC A4</i> : AN0781, <i>A. niger CBS 513.88</i> : An01g12470, <i>A. oryzae RIB40</i> : AO090011000360, <i>Aspergillus wentii</i> : Aspwe1_0112044 and <i>Aspergillus sydowii</i> : Aspsy1_0145580	8.05812	5.36	1	4	4	5	951	105.124	6.66846
	Afu6g07980	Afu6g07980 AspGDID:ASPL0000109158 COORDS:Chr6_A_fumigatus_Af293:1850730-1849524C, translated using codon table 1 (323 amino acids) Uncharacterized ORF; Ortholog(s) have RNA polymerase II core binding, cyclin-dependent protein serine/threonine kinase activity, histone binding activity	8.04782	11.46	1	3	3	3	323	36.6309	7.59131
	Afu7g05930	mepB AspGDID:ASPL0000110285 COORDS:Chr7_A_fumigatus_Af293:1452895-1455148W, translated using codon table 1 (716 amino acids) Verified ORF; Putative metallopeptidase with similarity to mammalian thimet oligopeptidases; conidia-enriched protein; transcript induced by exposure to human airway epithelial cells and by growth on BSA as a sole nitrogen source	7.98171	4.47	1	2	2	2	716	81.8584	5.78271
	Afu5g02370	Afu5g02370 AspGDID:ASPL0000107417 COORDS:Chr5_A_fumigatus_Af293:611752-609421C, translated using codon table 1 (686 amino acids) Uncharacterized ORF; Vacuolar ATP synthase catalytic subunit A; hypoxia induced protein; putative essential gene; induced by exposure to human airway epithelial cells	7.97338	5.1	1	2	2	2	686	74.865	6.18896
	Afu2g11450	Afu2g11450 AspGDID:ASPL0000103859 COORDS:Chr2_A_fumigatus_Af293:2948560-2946986C, translated using codon table 1 (524 amino acids) Uncharacterized ORF; Has domain(s) with predicted methyltransferase activity	7.95281	8.78	1	3	3	3	524	57.6007	9.67139
	Afu6g08580	fkbp4 AspGDID:ASPL0000109214 COORDS:Chr6_A_fumigatus_Af293:2030676-2032327W, translated using codon table 1 (489 amino acids) Uncharacterized ORF; Putative FK506-binding protein (FKBP)-type peptidyl-prolyl cis-trans isomerase	7.92595	8.79	1	2	2	2	489	53.0452	4.55127
	Afu2g02560	Afu2g02560 AspGDID:ASPL0000103086 COORDS:Chr2_A_fumigatus_Af293:659395-662458W, translated using codon table 1 (916 amino acids) Uncharacterized ORF; Ortholog(s) have role in establishment or maintenance of cell polarity and cytosol localization	7.85326	6.33	1	2	2	2	916	100.615	5.65576
	Afu6g13250	Afu6g13250 AspGDID:ASPL0000109666 COORDS:Chr6_A_fumigatus_Af293:3354774-3355600W, translated using codon table 1 (123 amino acids) Uncharacterized ORF; 60S ribosomal protein L31e; transcript induced by exposure to human airway epithelial cells	7.85323	27.64	1	4	4	4	123	13.9986	10.4917
	Afu1g08850	aspD AspGDID:ASPL0000101951 COORDS:Chr1_A_fumigatus_Af293:2293812-2292464C, translated using codon table 1 (346 amino acids) Verified ORF; Septin; localizes to long tubular structures within hyphae and to newly formed septa; repressed by exposure to artemisinin	7.8068	9.25	1	3	3	3	346	39.2071	7.84033
	Afu1g14290	Afu1g14290 AspGDID:ASPL0000102497 COORDS:Chr1_A_fumigatus_Af293:3820682-3821206W, translated using codon table 1 (138 amino acids) Uncharacterized ORF; Ortholog(s) have RNA binding activity and role in mRNA splicing, via spliceosome, maturation of SSU-rRNA, nuclear-transcribed mRNA catabolic process	7.80567	21.74	1	3	3	3	138	14.8083	6.81494
	Afu1g14410	rpl17 AspGDID:ASPL0000102509 COORDS:Chr1_A_fumigatus_Af293:3851949-3852806W, translated using codon table 1 (208 amino acids) Uncharacterized ORF; 60S ribosomal protein L17	7.72275	12.5	1	3	3	3	208	23.4136	10.9751
	Afu5g09250	Afu5g09250 AspGDID:ASPL0000107994 COORDS:Chr5_A_fumigatus_Af293:2380881-2384038W, translated using codon table 1 (980 amino acids) Uncharacterized ORF; Ortholog(s) have cytosol localization	7.70672	3.57	1	3	3	3	980	108.614	6.29053
	Afu4g10050	Afu4g10050 AspGDID:ASPL0000106719 COORDS:Chr4_A_fumigatus_Af293:2602022-2602919W, translated using codon table 1 (149 amino acids) Uncharacterized ORF; Calmodulin	7.69599	19.46	1	2	2	2	149	17.0019	4.27197
	Afu3g09280	Afu3g09280 AspGDID:ASPL0000105325 COORDS:Chr3_A_fumigatus_Af293:2354001-2355185W, translated using codon table 1 (308 amino acids) Uncharacterized ORF; Has domain(s) with predicted ribosome binding, translation initiation factor activity, role in regulation of translational initiation and eukaryotic translation initiation factor 3 complex localization	7.62847	8.44	1	2	2	2	308	34.3175	5.26221
	Afu1g09830	Afu1g09830 AspGDID:ASPL0000102049 COORDS:Chr1_A_fumigatus_Af293:2550807-2551983W, translated using codon table 1 (348 amino acids) Uncharacterized ORF; Ortholog(s) have protein complex scaffold activity, role in posttranslational protein targeting to membrane, response to heat and TRC complex, nucleus localization	7.59935	8.91	1	2	2	2	348	36.3346	5.021
	Afu5g01950	Afu5g01950 AspGDID:ASPL0000107375 COORDS:Chr5_A_fumigatus_Af293:500329-499510C, translated using codon table 1 (138 amino acids) Uncharacterized ORF; Ortholog(s) have chromatin binding activity	7.54473	20.29	1	2	3	3	138	14.7813	10.3745
	Afu6g04610	Afu6g04610 AspGDID:ASPL0000108915 COORDS:Chr6_A_fumigatus_Af293:1074626-1075267W, translated using codon table 1 (142 amino acids) Uncharacterized ORF; Ortholog(s) have RNA polymerase I activity, RNA polymerase III activity and role in tRNA transcription from RNA polymerase III promoter, transcription from RNA polymerase I promoter	7.53727	30.28	1	2	2	2	142	15.8344	4.37354
	Afu1g16523	Afu1g16523 AspGDID:ASPL0000361786 COORDS:Chr1_A_fumigatus_Af293:4479906-4479286C, translated using codon table 1 (93 amino acids) Uncharacterized ORF; Ortholog(s) have structural constituent of ribosome activity and cytosolic small ribosomal subunit localization	7.41168	31.18	1	3	3	3	93	10.2958	10.1841
	Afu1g07660	Afu1g07660 AspGDID:ASPL0000101931 COORDS:Chr1_A_fumigatus_Af293:2160796-2163243W, translated using codon table 1 (815 amino acids) Uncharacterized ORF; Ortholog of <i>A. nidulans FGSC A4</i> : AN5108, <i>A. niger CBS 513.88</i> : An07g10310, <i>A. oryzae RIB40</i> : AO090012001018, <i>Aspergillus wentii</i> : Aspwe1_0055253 and <i>Aspergillus sydowii</i> : Aspsy1_0091561	7.39214	3.93	1	2	2	2	815	89.868	9.27588
	Afu1g04550	Afu1g04550 AspGDID:ASPL0000101623 COORDS:Chr1_A_fumigatus_Af293:1287140-1288616W, translated using codon table 1 (309 amino acids) Uncharacterized ORF; Ortholog of <i>A. nidulans FGSC A4</i> : AN10103, <i>A. niger CBS 513.88</i> : An01g03560, <i>Neosartorya fischeri NRRL 181</i> : NFIA_020200, <i>Aspergillus wentii</i> : Aspwe1_0037471 and <i>Aspergillus versicolor</i> : Aspve1_0118735	7.3098	8.74	1	2	2	2	309	34.0082	8.51416
	Afu7g04190	Afu7g04190 AspGDID:ASPL0000110114 COORDS:Chr7_A_fumigatus_Af293:948503-946680C, translated using codon table 1 (519 amino acids) Uncharacterized ORF; Ortholog(s) have methyltransferase activity, role in cellular response to biotic stimulus, filamentous growth, glucosylceramide biosynthetic process, pathogenesis and plasma membrane localization	7.23322	5.97	1	2	2	2	519	58.9195	6.87354
	Afu2g04940	Afu2g04940 AspGDID:ASPL0000103319 COORDS:Chr2_A_fumigatus_Af293:1358892-1357362C, translated using codon table 1 (470 amino acids) Uncharacterized ORF; Ortholog(s) have mRNA binding activity, role in telomere maintenance via telomere shortening and cytoplasm, nucleus localization	7.22042	9.36	1	3	3	3	470	49.135	7.72314
	Afu4g13700	Afu4g13700 AspGDID:ASPL0000107076 COORDS:Chr4_A_fumigatus_Af293:3586027-3588483W, translated using codon table 1 (737 amino acids) Uncharacterized ORF; Ortholog(s) have cytosol localization	7.18748	6.11	1	3	3	3	737	84.4129	7.09326
	Afu2g12020	Afu2g12020 AspGDID:ASPL0000103916 COORDS:Chr2_A_fumigatus_Af293:3094051-3093551C, translated using codon table 1 (119 amino acids) Uncharacterized ORF; Ortholog(s) have cytosol, nucleus localization	7.1703	26.05	1	2	2	2	119	13.1978	10.228
	Afu6g02450	Afu6g02450 AspGDID:ASPL0000108700 COORDS:Chr6_A_fumigatus_Af293:460900-461479W, translated using codon table 1 (62 amino acids) Uncharacterized ORF; Ortholog(s) have cytoplasmic stress granule, cytosol, nucleus localization	7.1655	17.74	1	2	2	2	62	6.91494	11.5024
	Afu1g14570	Afu1g14570 AspGDID:ASPL0000102524 COORDS:Chr1_A_fumigatus_Af293:3892553-3895217W, translated using codon table 1 (872 amino acids) Uncharacterized ORF; Putative phosphoribosyl-AMP cyclohydrolase; no human homolog	7.14201	3.1	1	2	2	2	872	92.8238	5.65576
	Afu2g03590	Afu2g03590 AspGDID:ASPL0000103186 COORDS:Chr2_A_fumigatus_Af293:956883-956337C, translated using codon table 1 (88 amino acids) Uncharacterized ORF; Putative ribosomal protein S21e; transcript induced by exposure to human airway epithelial cells	7.06265	28.41	1	2	2	2	88	10.0029	8.30908
	Afu4g08530	Afu4g08530 AspGDID:ASPL0000106567 COORDS:Chr4_A_fumigatus_Af293:2210363-2208311C, translated using codon table 1 (603 amino acids) Uncharacterized ORF; Ortholog(s) have Golgi apparatus, cytosol, nucleus localization	7.03635	4.64	1	2	2	2	603	64.8358	6.44287
	Afu2g02530	Afu2g02530 AspGDID:ASPL0000103083 COORDS:Chr2_A_fumigatus_Af293:653117-654358W, translated using codon table 1 (371 amino acids) Uncharacterized ORF; Ortholog(s) have role in activation of bipolar cell growth, homologous chromosome segregation, protein phosphorylation, regulation of DNA repair and regulation of circadian rhythm, <a href="#GOsection">more</a>	7.0259	6.74	1	2	2	2	371	42.4086	9.45166
	Afu1g10970	Afu1g10970 AspGDID:ASPL0000102160 COORDS:Chr1_A_fumigatus_Af293:2865856-2868959W, translated using codon table 1 (955 amino acids) Uncharacterized ORF; Ortholog(s) have cytosol, plasma membrane localization	7.01915	2.51	1	2	2	2	955	106.49	5.70654
	Afu5g10560	Afu5g10560 AspGDID:ASPL0000108120 COORDS:Chr5_A_fumigatus_Af293:2704203-2703448C, translated using codon table 1 (196 amino acids) Uncharacterized ORF; Cytochrome c oxidase subunit V	6.99898	19.9	1	3	3	3	196	22.1855	9.94971
	Afu4g00960	pfkA AspGDID:ASPL0000106014 COORDS:Chr4_A_fumigatus_Af293:259114-261643W, translated using codon table 1 (808 amino acids) Uncharacterized ORF; Putative phosphofructokinase; reacts with rabbit immunosera exposed to A. fumigatus conidia	6.96966	3.59	1	2	2	2	808	88.6566	7.09326
	Afu3g09700	Afu3g09700 AspGDID:ASPL0000105368 COORDS:Chr3_A_fumigatus_Af293:2482012-2478686C, translated using codon table 1 (1019 amino acids) Uncharacterized ORF; Ortholog(s) have cytosol localization	6.96052	3.43	1	2	2	2	1019	110.14	6.66846
	Afu2g13250	trpB AspGDID:ASPL0000104039 COORDS:Chr2_A_fumigatus_Af293:3407647-3405303C, translated using codon table 1 (735 amino acids) Uncharacterized ORF; Putative bifunctional tryptophan synthase	6.93194	3.4	1	2	2	2	735	78.7133	5.96045
	Afu2g05740	Afu2g05740 AspGDID:ASPL0000103397 COORDS:Chr2_A_fumigatus_Af293:1617787-1618739W, translated using codon table 1 (192 amino acids) Uncharacterized ORF; Putative Rho-type GTPase	6.90984	15.1	1	2	2	2	192	21.4119	5.96045
	AfuMt00120	AfuMt00120 AspGDID:ASPL0000366358 COORDS:mito_A_fumigatus_Af293:25862-26623W, translated using codon table 4 (253 amino acids) Uncharacterized ORF; Ortholog(s) have cytochrome-c oxidase activity, role in aerobic respiration, mitochondrial electron transport, cytochrome c to oxygen and mitochondrial respiratory chain complex IV localization	6.89025	10.67	1	2	2	2	253	28.9926	4.76709
	Afu4g04318	Afu4g04318 AspGDID:ASPL0000366886 COORDS:Chr4_A_fumigatus_Af293:1217563-1217111C, translated using codon table 1 (111 amino acids) Uncharacterized ORF; Ortholog of <i>A. nidulans FGSC A4</i> : AN7011, <i>A. niger CBS 513.88</i> : An14g00530, <i>Aspergillus wentii</i> : Aspwe1_0053203, <i>Aspergillus sydowii</i> : Aspsy1_0184132 and <i>Aspergillus terreus NIH2624</i> : ATET_02726	6.86296	41.44	1	3	3	3	111	11.343	7.38623
	Afu1g05040	Afu1g05040 AspGDID:ASPL0000101673 COORDS:Chr1_A_fumigatus_Af293:1448185-1446768C, translated using codon table 1 (413 amino acids) Uncharacterized ORF; Ortholog(s) have ATPase activator activity, unfolded protein binding activity	6.85301	7.99	1	2	2	2	413	45.4385	6.26514
	Afu5g02910	Afu5g02910 AspGDID:ASPL0000107470 COORDS:Chr5_A_fumigatus_Af293:772100-770907C, translated using codon table 1 (354 amino acids) Uncharacterized ORF; NAP family protein	6.84983	7.34	1	3	3	3	354	41.0408	4.50049
	Afu2g09910	faa4 AspGDID:ASPL0000103707 COORDS:Chr2_A_fumigatus_Af293:2540651-2538322C, translated using codon table 1 (697 amino acids) Uncharacterized ORF; Putative long chain fatty acid CoA ligase; fatty acid activator; hypoxia repressed protein	6.82819	4.16	1	2	2	2	697	76.6677	7.31299
	Afu5g03140	Afu5g03140 AspGDID:ASPL0000107493 COORDS:Chr5_A_fumigatus_Af293:850226-851414W, translated using codon table 1 (334 amino acids) Uncharacterized ORF; Putative GTP cyclohydrolase; transcript induced by exposure to human airway epithelial cells	6.75815	6.89	1	2	2	2	334	36.8667	7.81104
	Afu7g02230	Afu7g02230 AspGDID:ASPL0000110018 COORDS:Chr7_A_fumigatus_Af293:599410-600851W, translated using codon table 1 (418 amino acids) Uncharacterized ORF; Ortholog(s) have mRNA binding activity, role in arginine catabolic process, positive regulation of cellular response to oxidative stress, positive regulation of nuclear-transcribed mRNA poly(A) tail shortening and cytosol localization	6.74491	6.7	1	2	2	2	418	44.8172	5.75732
	Afu1g09470	Afu1g09470 AspGDID:ASPL0000102013 COORDS:Chr1_A_fumigatus_Af293:2448655-2447399C, translated using codon table 1 (386 amino acids) Uncharacterized ORF; Putative class V aminotransferase; transcript up-regulated in conidia exposed to neutrophils	6.74045	9.07	1	2	2	2	386	41.8237	6.96143
	Afu3g09590	Afu3g09590 AspGDID:ASPL0000105357 COORDS:Chr3_A_fumigatus_Af293:2440296-2438341C, translated using codon table 1 (540 amino acids) Uncharacterized ORF; Ortholog(s) have role in cellular response to drug and chaperonin-containing T-complex, nucleus localization	6.69689	4.81	1	2	2	2	540	58.7327	6.75635
	Afu3g06030	Afu3g06030 AspGDID:ASPL0000105014 COORDS:Chr3_A_fumigatus_Af293:1483778-1482859C, translated using codon table 1 (147 amino acids) Uncharacterized ORF; Ortholog(s) have ubiquitin binding, ubiquitin-protein transferase activity	6.686	30.61	1	3	3	3	147	16.5113	6.91748
	Afu6g11120	Afu6g11120 AspGDID:ASPL0000109462 COORDS:Chr6_A_fumigatus_Af293:2746308-2743504C, translated using codon table 1 (869 amino acids) Uncharacterized ORF; Ortholog(s) have nucleolus localization	6.57294	4.37	1	2	2	2	869	96.2641	9.78857
	Afu2g10920	Afu2g10920 AspGDID:ASPL0000103807 COORDS:Chr2_A_fumigatus_Af293:2813917-2812855C, translated using codon table 1 (294 amino acids) Uncharacterized ORF; Putative enoyl-CoA hydratase/isomerase family protein with a predicted role in beta oxidation of fatty acids; transcript up-regulated in conidia exposed to neutrophils	6.56396	12.93	1	3	3	3	294	31.5663	8.55811
	Afu2g01750	Afu2g01750 AspGDID:ASPL0000103005 COORDS:Chr2_A_fumigatus_Af293:429523-427825C, translated using codon table 1 (461 amino acids) Uncharacterized ORF; Has domain(s) with predicted aminopeptidase activity, metalloexopeptidase activity and role in cellular process, proteolysis	6.55908	6.94	1	2	2	2	461	50.7856	5.96045
	Afu5g06020	Afu5g06020 AspGDID:ASPL0000107679 COORDS:Chr5_A_fumigatus_Af293:1429373-1426380C, translated using codon table 1 (958 amino acids) Uncharacterized ORF; Ortholog of <i>A. nidulans FGSC A4</i> : AN8823/scrC, <i>A. niger CBS 513.88</i> : An17g01805, <i>A. oryzae RIB40</i> : AO090009000658, <i>Aspergillus wentii</i> : Aspwe1_0023448 and <i>Aspergillus sydowii</i> : Aspsy1_0093280	6.55074	3.03	1	2	2	2	958	102.247	9.39307
	Afu1g07530	Afu1g07530 AspGDID:ASPL0000101918 COORDS:Chr1_A_fumigatus_Af293:2122230-2121254C, translated using codon table 1 (257 amino acids) Uncharacterized ORF; Ortholog(s) have adenylate kinase activity, role in ADP biosynthetic process, DNA replication initiation and cytosol, mitochondrial intermembrane space, mitochondrial outer membrane, nucleus localization	6.54137	10.51	1	2	2	2	257	28.6848	7.88428
	Afu3g10510	Afu3g10510 AspGDID:ASPL0000105449 COORDS:Chr3_A_fumigatus_Af293:2718868-2718533C, translated using codon table 1 (68 amino acids) Uncharacterized ORF; Ortholog of <i>A. nidulans FGSC A4</i> : AN4937, <i>A. niger CBS 513.88</i> : An16g04450, <i>Aspergillus wentii</i> : Aspwe1_0169043 and <i>Aspergillus sydowii</i> : Aspsy1_0087654	6.40349	30.88	1	2	2	2	68	7.33915	10.0962
	Afu8g04810	Afu8g04810 AspGDID:ASPL0000110815 COORDS:Chr8_A_fumigatus_Af293:1104248-1103015C, translated using codon table 1 (336 amino acids) Uncharacterized ORF; Ortholog(s) have role in circadian regulation of gene expression, conidium formation, establishment or maintenance of bipolar cell polarity regulating cell shape and protein phosphorylation, <a href="#GOsection">more</a>	6.34275	8.04	1	2	2	2	336	39.5131	7.31299
	Afu6g10260	akr1 AspGDID:ASPL0000109382 COORDS:Chr6_A_fumigatus_Af293:2540226-2538892C, translated using codon table 1 (334 amino acids) Verified ORF; Putative aldehyde reductase; abundant protein in conidia; transcript up-regulated in conidia exposed to neutrophils and to human airway epithelial cells	6.34048	11.08	1	3	3	3	334	37.1834	6.46826
	Afu2g09870	tif35 AspGDID:ASPL0000103703 COORDS:Chr2_A_fumigatus_Af293:2523373-2524473W, translated using codon table 1 (290 amino acids) Uncharacterized ORF; Eukaryotic translation initiation factor 3 subunit G	6.33352	8.28	1	2	2	2	290	31.8511	8.79248
	Afu4g06820	ecm33 AspGDID:ASPL0000106396 COORDS:Chr4_A_fumigatus_Af293:1762211-1763534W, translated using codon table 1 (398 amino acids) Verified ORF; Putative glycophosphatidylinositol (GPI)-anchored cell wall protein with similarity to S. cerevisiae Ecm33p; mutant conidia display a cell separation defect; hypoxia induced protein	6.30657	5.78	1	2	2	2	398	41.4798	4.98291
	Afu5g09060	Afu5g09060 AspGDID:ASPL0000107977 COORDS:Chr5_A_fumigatus_Af293:2330744-2329962C, translated using codon table 1 (260 amino acids) Uncharacterized ORF; Ortholog(s) have U4/U6 x U5 tri-snRNP complex, cytosol localization	6.30289	10	1	3	3	3	260	29.4267	4.729
	Afu2g09850	Afu2g09850 AspGDID:ASPL0000103701 COORDS:Chr2_A_fumigatus_Af293:2516744-2518045W, translated using codon table 1 (355 amino acids) Uncharacterized ORF; Putative oxidoreductase, 2-nitropropane dioxygenase family; transcript up-regulated in conidia exposed to neutrophils	6.27912	8.45	1	2	2	2	355	37.6787	7.02002
	Afu2g06000	Afu2g06000 AspGDID:ASPL0000103423 COORDS:Chr2_A_fumigatus_Af293:1696635-1700101W, translated using codon table 1 (1093 amino acids) Uncharacterized ORF; Putative NAD+ dependent glutamate dehydrogenase; transcript induced during conidial germination	6.25801	2.47	1	2	2	2	1093	123.281	6.55127
	Afu7g05950	Afu7g05950 AspGDID:ASPL0000110287 COORDS:Chr7_A_fumigatus_Af293:1457344-1456348C, translated using codon table 1 (139 amino acids) Uncharacterized ORF; Ortholog(s) have calcium ion binding activity and role in actomyosin contractile ring assembly actin filament organization, protein localization to medial cortex, regulation of cell cycle, spore germination	6.17636	19.42	1	2	2	2	139	15.3786	4.58936
	Afu2g08130	Afu2g08130 AspGDID:ASPL0000103533 COORDS:Chr2_A_fumigatus_Af293:2111022-2110081C, translated using codon table 1 (106 amino acids) Uncharacterized ORF; 60S ribosomal protein L44	6.16676	16.04	1	2	2	2	106	12.1367	10.4478
	Afu4g09030	Afu4g09030 AspGDID:ASPL0000106618 COORDS:Chr4_A_fumigatus_Af293:2345336-2342358C, translated using codon table 1 (953 amino acids) Verified ORF; Putative aminopeptidase; conidia-enriched protein; protein induced by heat shock; transcript induced by exposure to human airway epithelial cells; induced by gliotoxin exposure	6.13139	3.67	1	2	2	2	953	106.16	6.7417
	Afu3g01580	Afu3g01580 AspGDID:ASPL0000104678 COORDS:Chr3_A_fumigatus_Af293:397771-395356C, translated using codon table 1 (646 amino acids) Uncharacterized ORF; Putative glucose-methanol-choline (GMC) oxidoreductase; protein induced by hydrogen peroxide; hypoxia induced protein; repressed by gliotoxin exposure	6.06886	5.57	1	3	3	3	646	72.1047	7.41553
	Afu5g13920	wos2 AspGDID:ASPL0000108443 COORDS:Chr5_A_fumigatus_Af293:3643780-3644692W, translated using codon table 1 (201 amino acids) Uncharacterized ORF; Putative Hsp90 binding co-chaperone; reacts with rabbit immunosera exposed to A. fumigatus conidia	6.05766	10.95	1	2	2	2	201	22.1986	4.4751
	Afu6g10470	zpr1 AspGDID:ASPL0000109402 COORDS:Chr6_A_fumigatus_Af293:2596608-2598107W, translated using codon table 1 (475 amino acids) Uncharacterized ORF; Putative zinc finger protein; transcript highly induced during conidial germination	5.98542	5.89	1	2	2	2	475	53.5291	4.66553
	Afu6g06345	Afu6g06345 AspGDID:ASPL0000108995 COORDS:Chr6_A_fumigatus_Af293:1347575-1348344W, translated using codon table 1 (205 amino acids) Uncharacterized ORF; Ortholog(s) have 6,7-dimethyl-8-ribityllumazine synthase activity, role in riboflavin biosynthetic process and mitochondrial intermembrane space, nucleus localization	5.92463	19.51	1	2	2	2	205	21.5393	6.1001
	Afu1g09840	tim44 AspGDID:ASPL0000102050 COORDS:Chr1_A_fumigatus_Af293:2554479-2552871C, translated using codon table 1 (515 amino acids) Uncharacterized ORF; Mitochondrial inner membrane translocase subunit	5.85392	6.21	1	2	2	2	515	57.7095	9.11475
	Afu3g08980	Afu3g08980 AspGDID:ASPL0000105299 COORDS:Chr3_A_fumigatus_Af293:2294770-2296443W, translated using codon table 1 (536 amino acids) Uncharacterized ORF; Ortholog(s) have threonine synthase activity, role in threonine biosynthetic process and cytosol, nucleus localization	5.81159	4.85	1	2	2	2	536	59.2332	6.20166
	Afu6g07940	Afu6g07940 AspGDID:ASPL0000109154 COORDS:Chr6_A_fumigatus_Af293:1837939-1839097W, translated using codon table 1 (318 amino acids) Uncharacterized ORF; Putative lactoylglutathione lyase	5.74922	14.15	1	2	2	2	318	36.5071	6.39209
	Afu4g09810	Afu4g09810 AspGDID:ASPL0000106695 COORDS:Chr4_A_fumigatus_Af293:2553014-2551974C, translated using codon table 1 (287 amino acids) Uncharacterized ORF; Protein of unknown function identified by mass spectrometry	5.69903	10.1	1	2	2	2	287	31.6535	9.33447
	Afu2g12400	Afu2g12400 AspGDID:ASPL0000103954 COORDS:Chr2_A_fumigatus_Af293:3185304-3186292W, translated using codon table 1 (227 amino acids) Uncharacterized ORF; Putative ATP synthase oligomycin sensitivity conferral protein	5.69426	8.37	1	2	2	2	227	24.3742	9.64209
	Afu2g11940	ade13 AspGDID:ASPL0000103908 COORDS:Chr2_A_fumigatus_Af293:3080820-3078848C, translated using codon table 1 (483 amino acids) Uncharacterized ORF; Adenylosuccinate lyase; reacts with rabbit immunosera exposed to A. fumigatus conidia	5.6768	7.66	1	3	3	3	483	54.6911	6.55127
	Afu7g03740	cyp51B AspGDID:ASPL0000110069 COORDS:Chr7_A_fumigatus_Af293:806031-804301C, translated using codon table 1 (524 amino acids) Verified ORF; Putative 14-alpha demethylase with a predicted role in ergosterol biosynthesis; transcript upregulated in response to amphotericin B; SrbA-regulated during hypoxia	5.66945	4.77	1	2	2	2	524	58.8932	7.75244
	Afu4g07210	Afu4g07210 AspGDID:ASPL0000106435 COORDS:Chr4_A_fumigatus_Af293:1872976-1871931C, translated using codon table 1 (327 amino acids) Uncharacterized ORF; Mitochondrial acetolactate synthase small subunit; hypoxia induced protein; SrbA-regulated during hypoxia	5.65679	8.56	1	2	2	2	327	35.5515	6.85889
	Afu2g07410	Afu2g07410 AspGDID:ASPL0000103464 COORDS:Chr2_A_fumigatus_Af293:1884575-1885603W, translated using codon table 1 (216 amino acids) Uncharacterized ORF; Ortholog(s) have role in anisotropic cell growth, hyphal growth	5.62038	8.33	1	2	2	2	216	26.5249	9.64209
	Afu8g04620	Afu8g04620 AspGDID:ASPL0000110796 COORDS:Chr8_A_fumigatus_Af293:1052194-1054090W, translated using codon table 1 (570 amino acids) Uncharacterized ORF; Ortholog of <i>A. nidulans FGSC A4</i> : AN1470, <i>A. oryzae RIB40</i> : AO090023000316, <i>Aspergillus wentii</i> : Aspwe1_0175199, <i>Aspergillus sydowii</i> : Aspsy1_0143191 and <i>Aspergillus terreus NIH2624</i> : ATET_00086	5.58567	5.09	1	2	2	2	570	62.6149	4.97021
	Afu3g10520	Afu3g10520 AspGDID:ASPL0000105450 COORDS:Chr3_A_fumigatus_Af293:2719449-2722000W, translated using codon table 1 (808 amino acids) Uncharacterized ORF; Has domain(s) with predicted ATP binding, protein kinase activity, protein tyrosine kinase activity, transferase activity, transferring phosphorus-containing groups activity and role in protein phosphorylation	5.57939	2.6	1	2	2	2	808	91.3006	8.36768
	Afu4g10780	Afu4g10780 AspGDID:ASPL0000106791 COORDS:Chr4_A_fumigatus_Af293:2806494-2819008W, translated using codon table 1 (4039 amino acids) Uncharacterized ORF; Ortholog(s) have role in mRNA export from nucleus and nucleus localization	5.51959	0.47	1	2	2	3	4039	450.543	4.99561
	Afu1g15000	Afu1g15000 AspGDID:ASPL0000102567 COORDS:Chr1_A_fumigatus_Af293:4029547-4031693W, translated using codon table 1 (643 amino acids) Uncharacterized ORF; Putative isopropylmalate synthase; transcript highly induced during conidial germination; SrbA-regulated during hypoxia	5.51053	3.42	1	2	2	2	643	71.1504	5.68115
	Afu1g02270	abp2 AspGDID:ASPL0000101397 COORDS:Chr1_A_fumigatus_Af293:666424-664029C, translated using codon table 1 (780 amino acids) Uncharacterized ORF; Putative ARS binding protein	5.47205	2.82	1	2	2	2	780	85.2378	9.31982
	Afu4g11390	Afu4g11390 AspGDID:ASPL0000106848 COORDS:Chr4_A_fumigatus_Af293:2987902-2988695W, translated using codon table 1 (158 amino acids) Uncharacterized ORF; Ubiquinol-cytochrome c reductase complex 17 kd protein with a predicted role in oxidative phosphorylation	5.39689	15.19	1	2	2	3	158	17.8838	4.09424
	Afu3g05910	Afu3g05910 AspGDID:ASPL0000105004 COORDS:Chr3_A_fumigatus_Af293:1450275-1447686C, translated using codon table 1 (835 amino acids) Uncharacterized ORF; Has domain(s) with predicted role in DNA replication-independent nucleosome assembly and HIR complex localization	5.38581	3.11	1	2	2	2	835	87.3008	9.71533
	Afu1g09560	Afu1g09560 AspGDID:ASPL0000102022 COORDS:Chr1_A_fumigatus_Af293:2471314-2469899C, translated using codon table 1 (400 amino acids) Uncharacterized ORF; Ortholog(s) have role in mRNA processing, microtubule cytoskeleton organization, mitotic sister chromatid segregation and TORC1 complex, TORC2 complex, cytosol, nucleus localization	5.34322	6.25	1	2	2	2	400	43.7006	6.41748
	Afu8g01670	cat2 AspGDID:ASPL0000110606 COORDS:Chr8_A_fumigatus_Af293:441545-439266C, translated using codon table 1 (759 amino acids) Verified ORF; Putative bifunctional catalase-peroxidase; induction in response to hydrogen peroxide Yap1-dependent; transcript induced by exposure to human airway epithelial cells; SrbA-regulated during hypoxia	5.28981	4.48	1	2	2	2	759	83.7098	6.58057
	Afu1g09330	Afu1g09330 AspGDID:ASPL0000101999 COORDS:Chr1_A_fumigatus_Af293:2420356-2421522W, translated using codon table 1 (345 amino acids) Uncharacterized ORF; Ortholog(s) have sequence-specific DNA binding activity and role in translational initiation	5.23467	6.09	1	2	2	2	345	37.1759	4.88135
	Afu3g10350	Afu3g10350 AspGDID:ASPL0000105433 COORDS:Chr3_A_fumigatus_Af293:2680623-2684517W, translated using codon table 1 (1201 amino acids) Uncharacterized ORF; Ortholog of <i>A. nidulans FGSC A4</i> : AN4952, <i>A. niger CBS 513.88</i> : An16g04260, <i>A. oryzae RIB40</i> : AO090003000585, <i>Aspergillus wentii</i> : Aspwe1_0358461 and <i>Aspergillus sydowii</i> : Aspsy1_0029588	5.21574	2.5	1	3	3	3	1201	132.637	6.48096
	Afu1g14200	Afu1g14200 AspGDID:ASPL0000102488 COORDS:Chr1_A_fumigatus_Af293:3795841-3794154C, translated using codon table 1 (479 amino acids) Verified ORF; Putative mitochondrial processing peptidase beta subunit; induced by gliotoxin exposure	5.18664	5.01	1	2	2	2	479	53.2372	6.30322
	Afu6g04790	Afu6g04790 AspGDID:ASPL0000108933 COORDS:Chr6_A_fumigatus_Af293:1122936-1123878W, translated using codon table 1 (262 amino acids) Uncharacterized ORF; Ortholog(s) have role in proteasomal ubiquitin-independent protein catabolic process, proteasome-mediated ubiquitin-dependent protein catabolic process	5.17944	8.02	1	2	2	2	262	28.7374	5.2749
	Afu2g14960	Afu2g14960 AspGDID:ASPL0000104211 COORDS:Chr2_A_fumigatus_Af293:3942076-3942959W, translated using codon table 1 (271 amino acids) Uncharacterized ORF; Ortholog(s) have RNA polymerase II activating transcription factor binding, disulfide oxidoreductase activity	5.12921	7.38	1	2	2	2	271	28.7907	4.90674
	Afu1g13790	hhtA AspGDID:ASPL0000102447 COORDS:Chr1_A_fumigatus_Af293:3681876-3682468W, translated using codon table 1 (136 amino acids) Uncharacterized ORF; Histone H3	5.10997	28.68	1	2	2	2	136	15.3235	11.1509
	Afu3g10460	ntf2 AspGDID:ASPL0000105444 COORDS:Chr3_A_fumigatus_Af293:2708847-2709680W, translated using codon table 1 (124 amino acids) Uncharacterized ORF; Putative nuclear transport factor	5.06876	12.9	1	2	2	2	124	14.1939	4.75439
	Afu2g07600	Afu2g07600 AspGDID:ASPL0000103481 COORDS:Chr2_A_fumigatus_Af293:1937806-1939061W, translated using codon table 1 (352 amino acids) Uncharacterized ORF; Ortholog(s) have GTP binding, signal recognition particle binding activity, role in protein targeting to ER and integral component of endoplasmic reticulum membrane localization	5.06857	6.25	1	2	2	2	352	38.5801	6.13818
	Afu1g09800	Afu1g09800 AspGDID:ASPL0000102046 COORDS:Chr1_A_fumigatus_Af293:2543871-2545480W, translated using codon table 1 (394 amino acids) Uncharacterized ORF; Ortholog of S. cerevisiae OLA1; snoRNA Afu-304 encoded within intron 2	5.0595	4.82	1	2	2	2	394	43.452	7.81104
	Afu1g15450	Afu1g15450 AspGDID:ASPL0000102610 COORDS:Chr1_A_fumigatus_Af293:4172637-4171167C, translated using codon table 1 (424 amino acids) Uncharacterized ORF; Ortholog(s) have adenylosuccinate synthase activity, sulfinylpropanyl adenylate synthase activity	5.0337	5.9	1	2	2	2	424	46.6189	6.90283
	Afu2g02150	S10a AspGDID:ASPL0000103045 COORDS:Chr2_A_fumigatus_Af293:536724-537226W, translated using codon table 1 (116 amino acids) Uncharacterized ORF; Putative ribosomal protein S10	5.02266	16.38	1	2	2	2	116	13.0562	9.71533
	Afu5g03690	Afu5g03690 AspGDID:ASPL0000107547 COORDS:Chr5_A_fumigatus_Af293:987794-986454C, translated using codon table 1 (424 amino acids) Uncharacterized ORF; Ortholog(s) have phosphatidylinositol transporter activity	5.00001	5.19	1	2	2	2	424	46.141	4.84326
	Afu5g08290	Afu5g08290 AspGDID:ASPL0000107901 COORDS:Chr5_A_fumigatus_Af293:2105292-2104352C, translated using codon table 1 (283 amino acids) Uncharacterized ORF; Ortholog(s) have intracellular localization	4.97892	8.83	1	2	2	2	283	31.3553	6.69775
	Afu1g14110	Afu1g14110 AspGDID:ASPL0000102479 COORDS:Chr1_A_fumigatus_Af293:3773866-3773015C, translated using codon table 1 (234 amino acids) Uncharacterized ORF; Ortholog(s) have RNA polymerase I activity, RNA polymerase II activity, RNA polymerase III activity, RNA-directed RNA polymerase activity	4.97148	8.12	1	2	2	2	234	26.9388	7.89893
	Afu3g06760	Afu3g06760 AspGDID:ASPL0000105087 COORDS:Chr3_A_fumigatus_Af293:1678699-1677800C, translated using codon table 1 (158 amino acids) Uncharacterized ORF; Ribosomal protein L37	4.96868	11.39	1	2	2	2	158	17.9121	10.9897
	Afu1g02190	rab11 AspGDID:ASPL0000101389 COORDS:Chr1_A_fumigatus_Af293:648599-649525W, translated using codon table 1 (210 amino acids) Uncharacterized ORF; Ras GTPase; hypoxia repressed protein	4.95294	10.95	1	2	2	2	210	23.2808	5.68115
	Afu8g04170	Afu8g04170 AspGDID:ASPL0000110752 COORDS:Chr8_A_fumigatus_Af293:923375-921768C, translated using codon table 1 (535 amino acids) Uncharacterized ORF; Ortholog of <i>A. nidulans FGSC A4</i> : AN1421, <i>A. niger CBS 513.88</i> : An16g08920, <i>A. oryzae RIB40</i> : AO090103000032, <i>Aspergillus wentii</i> : Aspwe1_0043825 and <i>Aspergillus sydowii</i> : Aspsy1_0041969	4.94465	6.17	1	2	2	2	535	59.7629	8.45557
	Afu5g10570	Afu5g10570 AspGDID:ASPL0000108121 COORDS:Chr5_A_fumigatus_Af293:2705752-2704997C, translated using codon table 1 (154 amino acids) Verified ORF; Cofilin	4.944	24.03	1	2	2	2	154	17.0176	5.65576
	Afu2g03140	Afu2g03140 AspGDID:ASPL0000103143 COORDS:Chr2_A_fumigatus_Af293:823665-822897C, translated using codon table 1 (211 amino acids) Uncharacterized ORF; Ortholog(s) have peptide-methionine (S)-S-oxide reductase activity, role in cellular response to hydrogen peroxide and cytosol, nucleus localization	4.75321	12.8	1	2	2	2	211	23.5745	7.1958
	Afu5g06500	Afu5g06500 AspGDID:ASPL0000107726 COORDS:Chr5_A_fumigatus_Af293:1587081-1588611W, translated using codon table 1 (447 amino acids) Uncharacterized ORF; Acyl-CoA dehydrogenase family protein with a predicted role in fatty acid beta oxidation; induced by exposure to artemisinin	4.73325	4.7	1	2	2	2	447	49.1848	8.90967
	Afu6g08300	Afu6g08300 AspGDID:ASPL0000109187 COORDS:Chr6_A_fumigatus_Af293:1940980-1944815W, translated using codon table 1 (1235 amino acids) Uncharacterized ORF; Ortholog(s) have role in regulation of circadian rhythm	4.67735	2.59	1	3	3	3	1235	138.512	8.92432
	Afu4g07845	Afu4g07845 AspGDID:ASPL0000366765 COORDS:Chr4_A_fumigatus_Af293:2048985-2049508W, translated using codon table 1 (80 amino acids) Uncharacterized ORF; Ortholog(s) have cytosol localization	4.65772	18.75	1	2	2	2	80	9.2782	10.2866
	Afu5g11910	Afu5g11910 AspGDID:ASPL0000108247 COORDS:Chr5_A_fumigatus_Af293:3083334-3080506C, translated using codon table 1 (855 amino acids) Uncharacterized ORF; Ortholog(s) have Prp19 complex, cytosol, mitotic spindle pole body, spliceosomal complex localization	4.6197	2.57	1	2	2	2	855	98.9111	5.89697
	Afu2g12230	Afu2g12230 AspGDID:ASPL0000103937 COORDS:Chr2_A_fumigatus_Af293:3151850-3152676W, translated using codon table 1 (231 amino acids) Uncharacterized ORF; Ortholog(s) have structural constituent of ribosome activity and mitochondrial large ribosomal subunit localization	4.61543	8.66	1	2	2	3	231	25.4293	10.4478
	Afu3g11350	arsA AspGDID:ASPL0000105533 COORDS:Chr3_A_fumigatus_Af293:2972476-2973613W, translated using codon table 1 (340 amino acids) Uncharacterized ORF; ATPase; proteins are recognized and bound by Get3p then delivered to the ER	4.5912	7.65	1	2	2	2	340	37.416	5.09717
	Afu5g03320	Afu5g03320 AspGDID:ASPL0000107511 COORDS:Chr5_A_fumigatus_Af293:894808-897390W, translated using codon table 1 (823 amino acids) Uncharacterized ORF; Ortholog(s) have role in cellular response to UV, poly(A)+ mRNA export from nucleus, transcription initiation from RNA polymerase II promoter and nucleus localization	4.5584	2.19	1	2	2	2	823	92.8053	7.69385
	Afu6g12720	Afu6g12720 AspGDID:ASPL0000109615 COORDS:Chr6_A_fumigatus_Af293:3211760-3211177C, translated using codon table 1 (78 amino acids) Uncharacterized ORF; 40S ribosomal protein S29	4.44416	19.23	1	2	2	2	78	9.14763	10.0962
	Afu4g08040	Afu4g08040 AspGDID:ASPL0000106518 COORDS:Chr4_A_fumigatus_Af293:2090716-2089786C, translated using codon table 1 (218 amino acids) Uncharacterized ORF; Ortholog(s) have GTP binding activity	4.44177	13.76	1	2	2	2	218	23.7153	8.54346
	Afu2g16170	Afu2g16170 AspGDID:ASPL0000104334 COORDS:Chr2_A_fumigatus_Af293:4285165-4286985W, translated using codon table 1 (606 amino acids) Uncharacterized ORF; Has domain(s) with predicted DNA binding, DNA-directed RNA polymerase activity, role in transcription from RNA polymerase III promoter and DNA-directed RNA polymerase III complex localization	4.41655	6.11	1	2	2	2	606	65.038	5.32568
	Afu4g08480	Afu4g08480 AspGDID:ASPL0000106562 COORDS:Chr4_A_fumigatus_Af293:2190795-2194480W, translated using codon table 1 (1140 amino acids) Uncharacterized ORF; Ortholog(s) have cytosol, nucleus localization	4.40679	1.49	1	2	2	2	1140	124.656	5.14795
	Afu6g09330	Afu6g09330 AspGDID:ASPL0000109287 COORDS:Chr6_A_fumigatus_Af293:2227723-2229437W, translated using codon table 1 (468 amino acids) Uncharacterized ORF; Protein of unknown function	4.24898	5.77	1	2	2	2	468	54.5045	5.021
	Afu3g05830	Afu3g05830 AspGDID:ASPL0000104996 COORDS:Chr3_A_fumigatus_Af293:1426588-1424444C, translated using codon table 1 (693 amino acids) Uncharacterized ORF; Ortholog of <i>A. nidulans FGSC A4</i> : AN10409, <i>A. niger CBS 513.88</i> : An11g10770, <i>A. oryzae RIB40</i> : AO090020000051, <i>Aspergillus wentii</i> : Aspwe1_0029425 and <i>Aspergillus sydowii</i> : Aspsy1_0030109	4.24462	7.36	1	3	3	3	693	74.9729	7.6499
	Afu5g06130	Afu5g06130 AspGDID:ASPL0000107690 COORDS:Chr5_A_fumigatus_Af293:1465997-1464574C, translated using codon table 1 (331 amino acids) Uncharacterized ORF; Succinyl-CoA synthetase alpha subunit; hypoxia induced protein	4.22888	12.69	1	3	3	3	331	34.552	8.63135
	Afu5g11720	Afu5g11720 AspGDID:ASPL0000108229 COORDS:Chr5_A_fumigatus_Af293:3015667-3018681W, translated using codon table 1 (905 amino acids) Uncharacterized ORF; Ortholog(s) have role in proteasome-mediated ubiquitin-dependent protein catabolic process and cytosol, nucleus localization	4.19785	1.88	1	2	2	2	905	100.736	5.0083
	Afu2g11150	Afu2g11150 AspGDID:ASPL0000103830 COORDS:Chr2_A_fumigatus_Af293:2856083-2857872W, translated using codon table 1 (468 amino acids) Uncharacterized ORF; Putative secretory-pathway GDP dissociation inhibitor; transcript and protein levels increase upon exposure to amphotericin B	4.16724	7.05	1	3	3	3	468	52.2473	5.50342
	Afu6g08220	Afu6g08220 AspGDID:ASPL0000109179 COORDS:Chr6_A_fumigatus_Af293:1918815-1916089C, translated using codon table 1 (826 amino acids) Uncharacterized ORF; Ortholog(s) have role in hyphal growth and Cul3-RING ubiquitin ligase complex, cytosol localization	4.12059	6.66	1	2	2	2	826	94.4025	7.13721
	Afu3g08900	Afu3g08900 AspGDID:ASPL0000105291 COORDS:Chr3_A_fumigatus_Af293:2277005-2275596C, translated using codon table 1 (408 amino acids) Uncharacterized ORF; Putative tubulin-specific chaperone c; transcript up-regulated in conidia exposed to neutrophils; transcript induced by exposure to human airway epithelial cells	4.07991	5.15	1	2	2	2	408	44.215	5.40186
	Afu5g07890	Afu5g07890 AspGDID:ASPL0000107861 COORDS:Chr5_A_fumigatus_Af293:1979250-1978604C, translated using codon table 1 (149 amino acids) Uncharacterized ORF; Putative single-stranded DNA binding protein family member	4.03891	21.48	1	3	3	3	149	16.2432	9.68604
	Afu5g12370	Afu5g12370 AspGDID:ASPL0000108292 COORDS:Chr5_A_fumigatus_Af293:3211382-3212609W, translated using codon table 1 (368 amino acids) Uncharacterized ORF; Ortholog(s) have histone methyltransferase activity (H3-K4 specific) activity	4.02194	10.33	1	3	3	3	368	40.6092	6.62451
	Afu4g10020	Afu4g10020 AspGDID:ASPL0000106716 COORDS:Chr4_A_fumigatus_Af293:2596776-2595828C, translated using codon table 1 (242 amino acids) Uncharacterized ORF; Ortholog(s) have Golgi apparatus, cytoplasmic vesicle localization	4.00486	7.02	1	2	2	2	242	26.0718	4.60205
	Afu1g07480	hem13 AspGDID:ASPL0000101913 COORDS:Chr1_A_fumigatus_Af293:2109870-2111253W, translated using codon table 1 (440 amino acids) Uncharacterized ORF; Coproporphyrinogen III oxidase with a predicted role in heme biosynthesis; protein levels increase in amphotericin B; reacts with rabbit immunosera exposed to conidia; repressed by exposure to artemisinin; SrbA-regulated during hypoxia	3.98605	14.77	1	3	3	3	440	50.147	7.57666
	Afu3g05900	ste7 AspGDID:ASPL0000105003 COORDS:Chr3_A_fumigatus_Af293:1444958-1446786W, translated using codon table 1 (536 amino acids) Uncharacterized ORF; MAP kinase kinase (MAPKK)	3.78368	12.13	1	2	2	2	536	58.482	9.0708
	Afu5g08120	argJ AspGDID:ASPL0000107884 COORDS:Chr5_A_fumigatus_Af293:2055133-2056632W, translated using codon table 1 (466 amino acids) Uncharacterized ORF; Arginine biosynthesis bifunctional protein; SrbA-regulated during hypoxiano human homolog	3.76008	4.29	1	2	2	2	466	48.8928	6.12549
	Afu4g08710	Afu4g08710 AspGDID:ASPL0000106586 COORDS:Chr4_A_fumigatus_Af293:2256334-2255247C, translated using codon table 1 (287 amino acids) Uncharacterized ORF; Putative short chain dehydrogenase; transcriptionally up-regulated in conidia exposed to neutrophils; induced by gliotoxin exposure	3.72031	10.45	1	2	2	2	287	30.9087	5.38916
	Afu6g06580	Afu6g06580 AspGDID:ASPL0000109019 COORDS:Chr6_A_fumigatus_Af293:1433532-1432446C, translated using codon table 1 (269 amino acids) Uncharacterized ORF; Ortholog(s) have phosphomannomutase activity, role in ER to Golgi vesicle-mediated transport, establishment or maintenance of cell polarity, nuclear envelope organization, protein targeting to ER and cytosol, nucleus localization	3.58121	5.2	1	2	2	2	269	30.5733	5.66846
	Afu2g11510	Afu2g11510 AspGDID:ASPL0000103865 COORDS:Chr2_A_fumigatus_Af293:2966147-2968230W, translated using codon table 1 (650 amino acids) Uncharacterized ORF; Ortholog(s) have role in cellular response to drug, rRNA processing, ribosomal large subunit biogenesis, ribosomal subunit export from nucleus and nucleolus, preribosome, large subunit precursor, spindle localization	3.46823	3.23	1	2	2	2	650	73.251	8.86572
	Afu1g02340	Afu1g02340 AspGDID:ASPL0000101404 COORDS:Chr1_A_fumigatus_Af293:682116-683450W, translated using codon table 1 (444 amino acids) Uncharacterized ORF; Ortholog of <i>A. nidulans FGSC A4</i> : AN0334, <i>A. oryzae RIB40</i> : AO090005000866, <i>Aspergillus wentii</i> : Aspwe1_0169667 and <i>Aspergillus sydowii</i> : Aspsy1_0145773	3.11048	4.73	1	2	2	2	444	50.9571	7.18115
	Afu2g15870	Afu2g15870 AspGDID:ASPL0000104304 COORDS:Chr2_A_fumigatus_Af293:4194874-4191631C, translated using codon table 1 (1039 amino acids) Uncharacterized ORF; Ortholog(s) have cytosol, nuclear envelope localization	2.78458	2.5	1	2	2	2	1039	114.292	4.65283
	Afu3g13480	Afu3g13480 AspGDID:ASPL0000105743 COORDS:Chr3_A_fumigatus_Af293:3565478-3566600W, translated using codon table 1 (308 amino acids) Uncharacterized ORF; Translation initiation factor 2 alpha subunit	2.72902	15.91	1	3	3	3	308	35.014	5.8208
	Afu3g08640	Afu3g08640 AspGDID:ASPL0000105266 COORDS:Chr3_A_fumigatus_Af293:2213730-2212518C, translated using codon table 1 (340 amino acids) Uncharacterized ORF; Ortholog(s) have sequence-specific DNA binding activity and role in cellular response to drug, cellular response to osmotic stress, translational initiation	2.4698	8.24	1	2	2	2	340	37.6889	6.69775
	Afu2g11260	luA AspGDID:ASPL0000103841 COORDS:Chr2_A_fumigatus_Af293:2894027-2896466W, translated using codon table 1 (777 amino acids) Uncharacterized ORF; Putative 3-isopropylmalate dehydratase with a predicted role in nitrogen metabolism; protein induced by heat shock; SrbA-regulated during hypoxia	2.46678	4.25	1	3	3	3	777	84.0235	5.93506
	Afu5g10650	Afu5g10650 AspGDID:ASPL0000108129 COORDS:Chr5_A_fumigatus_Af293:2725117-2723747C, translated using codon table 1 (412 amino acids) Uncharacterized ORF; Has domain(s) with predicted FMN binding, oxidoreductase activity, oxidoreductase activity, acting on the CH-NH2 group of donors, pyridoxamine-phosphate oxidase activity	2.39804	7.04	1	2	2	2	412	45.9339	6.25244
	Afu5g10850	Afu5g10850 AspGDID:ASPL0000108147 COORDS:Chr5_A_fumigatus_Af293:2775553-2778014W, translated using codon table 1 (770 amino acids) Uncharacterized ORF; Ortholog(s) have cytosol, nucleus localization	2.29944	2.6	1	2	2	2	770	85.1778	8.30908
	Afu3g06460	Afu3g06460 AspGDID:ASPL0000105057 COORDS:Chr3_A_fumigatus_Af293:1595883-1595178C, translated using codon table 1 (144 amino acids) Uncharacterized ORF; Protein of unknown function; hypoxia induced protein	2.23623	13.89	1	2	2	2	144	16.3873	9.33447
	Afu3g07140	fluG AspGDID:ASPL0000105125 COORDS:Chr3_A_fumigatus_Af293:1793857-1791143C, translated using codon table 1 (864 amino acids) Verified ORF; Upstream activator of conidiation; required for proper regulation of brlA transcript levels; calcium induced	2.22304	3.36	1	2	2	2	864	96.9362	5.69385
	Afu7g04500	Afu7g04500 AspGDID:ASPL0000110143 COORDS:Chr7_A_fumigatus_Af293:1026112-1027349W, translated using codon table 1 (305 amino acids) Uncharacterized ORF; ATP phosphoribosyltransferase; role in histidine biosynthesis; no human homolog	2.10811	5.9	1	2	2	2	305	32.4795	6.13818
	Afu2g11340	Afu2g11340 AspGDID:ASPL0000103849 COORDS:Chr2_A_fumigatus_Af293:2922123-2921251C, translated using codon table 1 (248 amino acids) Uncharacterized ORF; Ortholog(s) have role in intracellular sterol transport and fungal-type vacuole lumen localization	2.06466	7.26	1	2	2	2	248	27.2728	5.93506
	Afu2g13780	Afu2g13780 AspGDID:ASPL0000104093 COORDS:Chr2_A_fumigatus_Af293:3592077-3588437C, translated using codon table 1 (1196 amino acids) Uncharacterized ORF; Ortholog(s) have role in mRNA cis splicing, via spliceosome and U2 snRNP localization	2.03836	3.18	1	2	2	2	1196	132.805	5.80811
	Afu2g09180	Afu2g09180 AspGDID:ASPL0000103636 COORDS:Chr2_A_fumigatus_Af293:2354314-2353640C, translated using codon table 1 (201 amino acids) Uncharacterized ORF; Ortholog(s) have role in retrograde vesicle-mediated transport, Golgi to ER and COPI vesicle coat, cytosol, nucleus localization	1.90241	8.46	1	2	2	2	201	21.9153	4.80518
	Afu6g06335	Afu6g06335 AspGDID:ASPL0000108993 COORDS:Chr6_A_fumigatus_Af293:1341485-1337700C, translated using codon table 1 (1241 amino acids) Uncharacterized ORF; Ortholog(s) have RNA binding, histone methyltransferase activity (H3-K4 specific) activity	1.86043	1.53	1	2	2	2	1241	139.283	8.57275
	Afu1g12760	capA AspGDID:ASPL0000102344 COORDS:Chr1_A_fumigatus_Af293:3372016-3373824W, translated using codon table 1 (526 amino acids) Uncharacterized ORF; Adenylate cyclase-associated protein	1.7235	4.75	1	2	2	2	526	56.4272	6.69775
	Afu4g11040	Afu4g11040 AspGDID:ASPL0000106814 COORDS:Chr4_A_fumigatus_Af293:2875708-2877880W, translated using codon table 1 (674 amino acids) Uncharacterized ORF; Ortholog(s) have protein-lysine N-methyltransferase activity, role in peptidyl-lysine methylation and cytosol, nucleus localization	1.64243	4.45	1	2	2	2	674	76.2913	5.16064
	Afu3g06140	Afu3g06140 AspGDID:ASPL0000105025 COORDS:Chr3_A_fumigatus_Af293:1516711-1520611W, translated using codon table 1 (1043 amino acids) Uncharacterized ORF; Ortholog(s) have role in G1 to G0 transition, actin filament organization, activation of bipolar cell growth, cellular protein localization and cellular response to nitrogen starvation, <a href="#GOsection">more</a>	1.61487	2.97	1	3	3	3	1043	118.311	5.59229
	Afu1g01010	Afu1g01010 AspGDID:ASPL0000101271 COORDS:Chr1_A_fumigatus_Af293:352044-358955W, translated using codon table 1 (2098 amino acids) Uncharacterized ORF; Putative polyketide synthase (PKS), encoded in a predicted secondary metabolite gene cluster	0	1.38	1	2	2	2	2098	231.165	5.79541
	Afu2g11780	Afu2g11780 AspGDID:ASPL0000103892 COORDS:Chr2_A_fumigatus_Af293:3035518-3036792W, translated using codon table 1 (424 amino acids) Uncharacterized ORF; Ortholog(s) have sequence-specific DNA binding, sequence-specific DNA binding transcription factor activity, transcription regulatory region DNA binding activity	0	5.9	1	2	2	3	424	45.7573	9.46631
	Afu8g01140	Afu8g01140 AspGDID:ASPL0000110553 COORDS:Chr8_A_fumigatus_Af293:269658-267902C, translated using codon table 1 (512 amino acids) Uncharacterized ORF; Has domain(s) with predicted DNA binding, sequence-specific DNA binding RNA polymerase II transcription factor activity, zinc ion binding activity and role in regulation of transcription, DNA-templated, transcription, DNA-templated	0	8.59	1	2	2	2	512	58.3397	8.17725
	Afu6g06720	Afu6g06720 AspGDID:ASPL0000109034 COORDS:Chr6_A_fumigatus_Af293:1462810-1465966W, translated using codon table 1 (906 amino acids) Uncharacterized ORF; Putative protein serine/threonine kinase	0	5.3	1	2	2	2	906	99.7949	9.64209
	Afu2g16310	Afu2g16310 AspGDID:ASPL0000104349 COORDS:Chr2_A_fumigatus_Af293:4329182-4326653C, translated using codon table 1 (764 amino acids) Uncharacterized ORF; Putative fungal-specific transcription factor	0	1.96	1	2	2	2	764	85.8884	6.66846

## Sheet: SakA GFP CR_15min
Accession	Accession	Description	Score	Coverage	# Proteins	# Unique Peptides	# Peptides	# PSMs	# AAs	MW [kDa]	calc. pI
Afu1g12940	Afu1g12940	sakA AspGDID:ASPL0000102362 COORDS:Chr1_A_fumigatus_Af293:3428181-3429807W, translated using codon table 1 (366 amino acids) Verified ORF; Putative mitogen-activated protein kinase (MAPK) with predicted roles in the osmotic and oxidative stress responses; involved in sensing nitrogen in the medium	262.927	77.32	1	21	21	62	366	41.9334	5.60498
Afu4g03760	Afu3g06550	Afu3g06550 AspGDID:ASPL0000105066 COORDS:Chr3_A_fumigatus_Af293:1623469-1625008W, translated using codon table 1 (469 amino acids) Uncharacterized ORF; Has domain(s) with predicted phosphatase activity, phosphoserine phosphatase activity and role in L-serine biosynthetic process, metabolic process	170.293	69.08	1	21	21	33	469	51.8419	5.89697
Afu6g06720	Afu7g02260	Afu7g02260 AspGDID:ASPL0000110021 COORDS:Chr7_A_fumigatus_Af293:610666-608054C, translated using codon table 1 (784 amino acids) Uncharacterized ORF; Ortholog of <i>A. nidulans FGSC A4</i> : AN9087/oefA, <i>A. niger CBS 513.88</i> : An12g00390, <i>A. oryzae RIB40</i> : AO090038000604, <i>Aspergillus wentii</i> : Aspwe1_0113275 and <i>Aspergillus sydowii</i> : Aspsy1_0061396	54.4627	26.02	1	10	10	12	784	84.5043	8.67529
Afu7g06010	Afu7g01860	sti1 AspGDID:ASPL0000109981 COORDS:Chr7_A_fumigatus_Af293:501500-503455W, translated using codon table 1 (581 amino acids) Verified ORF; Putative heat shock protein; protein levels increase in response to amphotericin B; transcript induced by exposure to human airway epithelial cells; induced by gliotoxin exposure	40.316	22.55	1	9	9	11	581	64.2614	5.57959
Afu6g12680	Afu2g15760	Afu2g15760 AspGDID:ASPL0000104293 COORDS:Chr2_A_fumigatus_Af293:4162600-4165937W, translated using codon table 1 (1033 amino acids) Uncharacterized ORF; Ortholog(s) have ubiquitin activating enzyme activity, role in mRNA export from nucleus, protein ubiquitination and cytosol, nucleus localization	37.2979	18.1	1	12	12	13	1033	115.146	5.24951
Afu7g04650	Afu3g10660	erg13 AspGDID:ASPL0000105464 COORDS:Chr3_A_fumigatus_Af293:2760689-2762268W, translated using codon table 1 (460 amino acids) Uncharacterized ORF; Putative hydroxymethyl glutaryl-coenzyme A synthase with a predicted role in ergosterol biosynthesis; SrbA-regulated during hypoxia	37.0668	22.39	1	6	6	7	460	50.7644	6.55127
Afu1g14640	Afu1g09010	Afu1g09010 AspGDID:ASPL0000101967 COORDS:Chr1_A_fumigatus_Af293:2333751-2335765W, translated using codon table 1 (651 amino acids) Uncharacterized ORF; Ortholog(s) have cytosol localization	34.1843	18.43	1	7	7	8	651	72.8652	7.06396
Afu6g12580	Afu4g03760	Afu4g03760 AspGDID:ASPL0000106195 COORDS:Chr4_A_fumigatus_Af293:1054642-1057888W, translated using codon table 1 (1060 amino acids) Uncharacterized ORF; Putative glycine dehydrogenase	32.6774	12.55	1	9	9	9	1060	115.13	7.15186
Afu3g06410	Afu7g03980	Afu7g03980 AspGDID:ASPL0000110093 COORDS:Chr7_A_fumigatus_Af293:893752-895260W, translated using codon table 1 (468 amino acids) Uncharacterized ORF; Ortholog(s) have role in translational initiation and cytosol, eukaryotic 43S preinitiation complex, eukaryotic translation initiation factor 3 complex, eIF3m, nucleus localization	31.5195	20.51	1	8	8	9	468	51.0816	5.05908
Afu6g09070	Afu3g12100	Afu3g12100 AspGDID:ASPL0000105606 COORDS:Chr3_A_fumigatus_Af293:3178707-3181079W, translated using codon table 1 (694 amino acids) Uncharacterized ORF; Putative trehalase phosphorylase with a predicted role in the glucose-1-phosphate pathway	31.4232	19.88	1	8	8	8	694	78.2557	6.1001
Afu5g08130	Afu4g03630	erg6 AspGDID:ASPL0000106182 COORDS:Chr4_A_fumigatus_Af293:1025739-1024484C, translated using codon table 1 (377 amino acids) Uncharacterized ORF; Putative sterol 24-C-methyltransferase with a predicted role in ergosterol biosynthesis; transcript downregulated in response to amphotericin B; induced by exposure to artemisinin; SrbA-regulated during hypoxia	30.6557	34.75	1	8	8	8	377	42.5439	6.43018
Afu5g11210	Afu6g02910	argEF AspGDID:ASPL0000108747 COORDS:Chr6_A_fumigatus_Af293:603327-600472C, translated using codon table 1 (906 amino acids) Verified ORF; Mitochondrial bifunctional enzyme with N-acetyl-gamma-glutamyl-phosphate reductase and acetylglutamate kinase activity, catalyzes the second and third step in arginine biosynthesis	29.2364	13.02	1	9	9	9	906	99.3845	8.14795
Afu1g12960	Afu6g07940	Afu6g07940 AspGDID:ASPL0000109154 COORDS:Chr6_A_fumigatus_Af293:1837939-1839097W, translated using codon table 1 (318 amino acids) Uncharacterized ORF; Putative lactoylglutathione lyase	28.6093	39.62	1	7	7	7	318	36.5071	6.39209
Afu4g06020	Afu2g12910	Afu2g12910 AspGDID:ASPL0000104004 COORDS:Chr2_A_fumigatus_Af293:3311664-3309244C, translated using codon table 1 (741 amino acids) Uncharacterized ORF; Ortholog of <i>A. nidulans FGSC A4</i> : AN6264, <i>A. niger CBS 513.88</i> : An02g01620, <i>A. oryzae RIB40</i> : AO090026000343, <i>Aspergillus wentii</i> : Aspwe1_0117790 and <i>Aspergillus sydowii</i> : Aspsy1_0151049	28.0725	12.96	1	6	6	6	741	80.0612	10.0229
Afu7g08575	Afu3g10310	Afu3g10310 AspGDID:ASPL0000105429 COORDS:Chr3_A_fumigatus_Af293:2671052-2673496W, translated using codon table 1 (743 amino acids) Uncharacterized ORF; Ortholog(s) have acetolactate synthase activity, flavin adenine dinucleotide binding activity, role in isoleucine biosynthetic process, valine biosynthetic process and acetolactate synthase complex, mitochondrion localization	27.672	14.94	1	6	6	6	743	81.4649	8.54346
	Afu7g05370	aspB AspGDID:ASPL0000110230 COORDS:Chr7_A_fumigatus_Af293:1290537-1292385W, translated using codon table 1 (463 amino acids) Verified ORF; Putative septin; Yap1-dependent induction in response to hydrogen peroxide; localizes to septa and to rings at the base of developing phialides; hypoxia repressed protein	27.5176	23.76	1	7	8	8	463	52.5207	6.97607
	Afu3g13870	nsdD AspGDID:ASPL0000105780 COORDS:Chr3_A_fumigatus_Af293:3674484-3676292W, translated using codon table 1 (493 amino acids) Verified ORF; Putative GATA-type transcriptional activator; required during an early stage of mating; plays a role in resistance toward cell wall stress	27.3795	14	1	5	5	7	493	52.9912	9.26123
	Afu5g10570	Afu5g10570 AspGDID:ASPL0000108121 COORDS:Chr5_A_fumigatus_Af293:2705752-2704997C, translated using codon table 1 (154 amino acids) Verified ORF; Cofilin	26.8586	40.91	1	4	4	6	154	17.0176	5.65576
	Afu2g07420	sac6 AspGDID:ASPL0000103465 COORDS:Chr2_A_fumigatus_Af293:1889973-1887748C, translated using codon table 1 (646 amino acids) Verified ORF; Putative actin-bundling protein, fimbrin; conidia-enriched protein	26.4228	15.17	1	6	6	7	646	72.4336	6.12549
	Afu5g02370	Afu5g02370 AspGDID:ASPL0000107417 COORDS:Chr5_A_fumigatus_Af293:611752-609421C, translated using codon table 1 (686 amino acids) Uncharacterized ORF; Vacuolar ATP synthase catalytic subunit A; hypoxia induced protein; putative essential gene; induced by exposure to human airway epithelial cells	24.9858	12.1	1	4	4	5	686	74.865	6.18896
	Afu2g15940	Afu2g15940 AspGDID:ASPL0000104311 COORDS:Chr2_A_fumigatus_Af293:4216706-4215369C, translated using codon table 1 (445 amino acids) Uncharacterized ORF; Cofactor for methionyl-and glutamyl-tRNA synthetases	24.6371	21.12	1	5	5	5	445	47.4928	6.96143
	Afu1g06790	Afu1g06790 AspGDID:ASPL0000101847 COORDS:Chr1_A_fumigatus_Af293:1937397-1941009W, translated using codon table 1 (1095 amino acids) Uncharacterized ORF; Ortholog(s) have role in protein import into nucleus, regulation of mitotic cell cycle and cytosol, nuclear membrane, nucleolus localization	23.9023	9.86	1	7	7	7	1095	121.355	4.76709
	Afu7g00250	tub2 AspGDID:ASPL0000109824 COORDS:Chr7_A_fumigatus_Af293:70221-71948W, translated using codon table 1 (448 amino acids) Uncharacterized ORF; Tubulin beta-2 subunit; predicted gene pair with AFUA_1G10910 (tubA)	23.5985	18.3	1	2	3	4	448	49.8598	4.98291
	Afu1g12250	rcfB AspGDID:ASPL0000102291 COORDS:Chr1_A_fumigatus_Af293:3235631-3234741C, translated using codon table 1 (268 amino acids) Uncharacterized ORF; Mitochondrial hypoxia response domain protein; protein and transcript levels downregulated by caspofungin treatmen	23.4408	30.97	1	4	4	6	268	29.5042	8.85107
	Afu5g05500	Afu5g05500 AspGDID:ASPL0000107629 COORDS:Chr5_A_fumigatus_Af293:1277444-1278887W, translated using codon table 1 (424 amino acids) Uncharacterized ORF; Ortholog(s) have phosphoglycerate dehydrogenase activity, role in serine family amino acid biosynthetic process and cytosol localization	21.1572	19.81	1	6	6	6	424	45.8868	7.00537
	Afu6g03460	Afu6g03460 AspGDID:ASPL0000108801 COORDS:Chr6_A_fumigatus_Af293:741171-742895W, translated using codon table 1 (574 amino acids) Uncharacterized ORF; Has domain(s) with predicted ATP binding activity	21.0272	13.94	1	4	4	4	574	63.4223	6.13818
	Afu3g01580	Afu3g01580 AspGDID:ASPL0000104678 COORDS:Chr3_A_fumigatus_Af293:397771-395356C, translated using codon table 1 (646 amino acids) Uncharacterized ORF; Putative glucose-methanol-choline (GMC) oxidoreductase; protein induced by hydrogen peroxide; hypoxia induced protein; repressed by gliotoxin exposure	20.8859	13.16	1	8	8	8	646	72.1047	7.41553
	Afu3g11390	Afu3g11390 AspGDID:ASPL0000105537 COORDS:Chr3_A_fumigatus_Af293:2988245-2989876W, translated using codon table 1 (465 amino acids) Uncharacterized ORF; Ortholog(s) have role in positive regulation of RNA polymerase II transcriptional preinitiation complex assembly, proteasome regulatory particle assembly, ubiquitin-dependent protein catabolic process	20.8166	18.49	1	6	6	6	465	51.5677	5.30029
	Afu1g15450	Afu1g15450 AspGDID:ASPL0000102610 COORDS:Chr1_A_fumigatus_Af293:4172637-4171167C, translated using codon table 1 (424 amino acids) Uncharacterized ORF; Ortholog(s) have adenylosuccinate synthase activity, sulfinylpropanyl adenylate synthase activity	20.8072	13.44	1	4	4	5	424	46.6189	6.90283
	Afu1g05620	Afu1g05620 AspGDID:ASPL0000101730 COORDS:Chr1_A_fumigatus_Af293:1613252-1615558W, translated using codon table 1 (600 amino acids) Uncharacterized ORF; Ortholog(s) have phenylalanine-tRNA ligase activity, role in cellular response to drug, phenylalanyl-tRNA aminoacylation and cytosol, nucleus, phenylalanine-tRNA ligase complex localization	20.7711	17.83	1	6	6	6	600	67.8031	5.68115
	Afu1g04950	glcA AspGDID:ASPL0000101664 COORDS:Chr1_A_fumigatus_Af293:1412013-1410732C, translated using codon table 1 (323 amino acids) Uncharacterized ORF; Ortholog(s) have protein serine/threonine phosphatase activity	20.5677	28.79	1	5	5	6	323	37.0616	5.78271
	Afu2g04680	pakA AspGDID:ASPL0000103294 COORDS:Chr2_A_fumigatus_Af293:1275738-1273126C, translated using codon table 1 (815 amino acids) Uncharacterized ORF; Protein serine/threonine kinase; similar to Ste20, a sexual development regulator	20.5558	11.66	1	5	5	5	815	89.6158	9.43701
	Afu1g09330	Afu1g09330 AspGDID:ASPL0000101999 COORDS:Chr1_A_fumigatus_Af293:2420356-2421522W, translated using codon table 1 (345 amino acids) Uncharacterized ORF; Ortholog(s) have sequence-specific DNA binding activity and role in translational initiation	20.5133	20.29	1	6	6	6	345	37.1759	4.88135
	Afu4g06900	Afu4g06900 AspGDID:ASPL0000106404 COORDS:Chr4_A_fumigatus_Af293:1787004-1789272W, translated using codon table 1 (573 amino acids) Uncharacterized ORF; Ortholog(s) have asparagine synthase (glutamine-hydrolyzing) activity, role in asparagine biosynthetic process and cytosol, nucleus localization	20.4121	17.45	1	6	6	6	573	64.6714	6.29053
	Afu2g11475	Afu2g11475 AspGDID:ASPL0000363557 COORDS:Chr2_A_fumigatus_Af293:2956635-2957821W, translated using codon table 1 (305 amino acids) Uncharacterized ORF; Ortholog(s) have role in endocytosis, establishment or maintenance of actin cytoskeleton polarity, vacuole organization and integral component of Golgi membrane localization	19.9824	20.66	1	4	4	5	305	33.5423	5.2749
	Afu6g08750	Afu6g08750 AspGDID:ASPL0000109231 COORDS:Chr6_A_fumigatus_Af293:2073566-2071674C, translated using codon table 1 (578 amino acids) Uncharacterized ORF; Ortholog(s) have role in hyphal growth and cytosol, mitochondrion localization	19.8735	12.63	1	4	4	4	578	62.9819	8.17725
	Afu3g08980	Afu3g08980 AspGDID:ASPL0000105299 COORDS:Chr3_A_fumigatus_Af293:2294770-2296443W, translated using codon table 1 (536 amino acids) Uncharacterized ORF; Ortholog(s) have threonine synthase activity, role in threonine biosynthetic process and cytosol, nucleus localization	19.6086	18.28	1	6	6	6	536	59.2332	6.20166
	Afu3g14540	hsp30 AspGDID:ASPL0000105843 COORDS:Chr3_A_fumigatus_Af293:3853746-3853204C, translated using codon table 1 (180 amino acids) Verified ORF; Putative 30-kilodalton heat shock protein; conidia-enriched protein; protein levels increase in response to amphotericin B and hydrogen peroxide	19.5182	24.44	1	4	4	5	180	20.4503	6.55127
	Afu4g11240	aarA AspGDID:ASPL0000106833 COORDS:Chr4_A_fumigatus_Af293:2938272-2942727W, translated using codon table 1 (1425 amino acids) Uncharacterized ORF; Putative alpha-aminoadipate reductase, large subunit, involved in lysine metabolism; predicted essential gene; transcript induced by exposure to human airway epithelial cells	19.4082	5.05	1	5	5	5	1425	157.08	6.07471
	Afu3g09030	Afu3g09030 AspGDID:ASPL0000105302 COORDS:Chr3_A_fumigatus_Af293:2303487-2302210C, translated using codon table 1 (310 amino acids) Uncharacterized ORF; Ortholog(s) have role in aerobic respiration, penicillin biosynthetic process and mitochondrial matrix localization	18.7728	15.16	1	3	3	5	310	34.8563	4.65283
	Afu1g02980	Afu1g02980 AspGDID:ASPL0000101468 COORDS:Chr1_A_fumigatus_Af293:854826-855623W, translated using codon table 1 (265 amino acids) Uncharacterized ORF; Putative 6-phosphogluconolactonase; calcium downregulated	18.6035	21.13	1	5	5	5	265	28.8198	6.27783
	Afu5g11240	Afu5g11240 AspGDID:ASPL0000108183 COORDS:Chr5_A_fumigatus_Af293:2877011-2875843C, translated using codon table 1 (311 amino acids) Uncharacterized ORF; Ortholog(s) have carbonyl reductase (NADPH) activity, oxidoreductase activity, acting on the aldehyde or oxo group of donors, NAD or NADP as acceptor activity and cytosol, nucleus, ribosome localization	18.3708	24.76	1	4	4	4	311	33.6528	8.98291
	Afu3g08640	Afu3g08640 AspGDID:ASPL0000105266 COORDS:Chr3_A_fumigatus_Af293:2213730-2212518C, translated using codon table 1 (340 amino acids) Uncharacterized ORF; Ortholog(s) have sequence-specific DNA binding activity and role in cellular response to drug, cellular response to osmotic stress, translational initiation	18.0638	25	1	4	4	4	340	37.6889	6.69775
	Afu6g03540	acuE AspGDID:ASPL0000108809 COORDS:Chr6_A_fumigatus_Af293:768975-770805W, translated using codon table 1 (539 amino acids) Verified ORF; Putative malate synthase; protein abundant in conidia	18.0332	13.91	1	6	6	6	539	61.0212	8.11865
	Afu6g07540	Afu6g07540 AspGDID:ASPL0000109114 COORDS:Chr6_A_fumigatus_Af293:1715811-1713540C, translated using codon table 1 (548 amino acids) Uncharacterized ORF; Ortholog(s) have chaperonin-containing T-complex localization	18.0236	10.95	1	6	6	6	548	59.8493	5.51611
	Afu6g04010	Afu6g04010 AspGDID:ASPL0000108856 COORDS:Chr6_A_fumigatus_Af293:901498-904822W, translated using codon table 1 (962 amino acids) Uncharacterized ORF; Ortholog(s) have importin-alpha export receptor activity, role in cell division, protein export from nucleus and nuclear membrane localization	17.9233	9.25	1	6	6	6	962	108.421	5.37646
	Afu3g11640	Afu3g11640 AspGDID:ASPL0000105562 COORDS:Chr3_A_fumigatus_Af293:3058607-3059789W, translated using codon table 1 (368 amino acids) Uncharacterized ORF; Homoserine dehydrogenase; no human homolog	17.812	20.65	1	5	5	5	368	38.4803	5.87158
	Afu5g07120	Afu5g07120 AspGDID:ASPL0000107787 COORDS:Chr5_A_fumigatus_Af293:1769812-1771261W, translated using codon table 1 (352 amino acids) Uncharacterized ORF; RNP domain protein; reacts with rabbit immunosera exposed to A. fumigatus conidia	17.6713	25.85	1	5	5	5	352	37.116	9.15869
	Afu5g03690	Afu5g03690 AspGDID:ASPL0000107547 COORDS:Chr5_A_fumigatus_Af293:987794-986454C, translated using codon table 1 (424 amino acids) Uncharacterized ORF; Ortholog(s) have phosphatidylinositol transporter activity	17.036	24.53	1	6	6	6	424	46.141	4.84326
	Afu1g10970	Afu1g10970 AspGDID:ASPL0000102160 COORDS:Chr1_A_fumigatus_Af293:2865856-2868959W, translated using codon table 1 (955 amino acids) Uncharacterized ORF; Ortholog(s) have cytosol, plasma membrane localization	17.0134	7.43	1	6	6	6	955	106.49	5.70654
	Afu5g09400	Afu5g09400 AspGDID:ASPL0000108009 COORDS:Chr5_A_fumigatus_Af293:2418391-2419402W, translated using codon table 1 (294 amino acids) Uncharacterized ORF; Putative carbonyl reductase; transcript up-regulated in conidia exposed to neutrophils	16.5926	16.33	1	4	4	5	294	31.4496	6.30322
	Afu5g02360	Afu5g02360 AspGDID:ASPL0000107416 COORDS:Chr5_A_fumigatus_Af293:608651-606106C, translated using codon table 1 (698 amino acids) Uncharacterized ORF; Ortholog(s) have role in hyphal growth, peroxisome organization, vacuole organization and Golgi apparatus localization	16.5696	11.46	1	4	4	4	698	78.1349	8.17725
	Afu6g03810	Afu6g03810 AspGDID:ASPL0000108836 COORDS:Chr6_A_fumigatus_Af293:840093-839212C, translated using codon table 1 (255 amino acids) Uncharacterized ORF; Putative mitochondrial ATP synthase D chain; hypoxia induced protein	16.2135	21.96	1	4	4	4	255	28.6782	9.0415
	Afu1g11480	Afu1g11480 AspGDID:ASPL0000102211 COORDS:Chr1_A_fumigatus_Af293:3031787-3030921C, translated using codon table 1 (168 amino acids) Uncharacterized ORF; Protein of unknown function; transcript up-regulated in conidia exposed to neutrophils	15.9003	39.88	1	5	5	5	168	18.216	5.52881
	Afu1g02150	Afu1g02150 AspGDID:ASPL0000101385 COORDS:Chr1_A_fumigatus_Af293:639645-637892C, translated using codon table 1 (519 amino acids) Uncharacterized ORF; Ortholog(s) have glycerol-3-phosphate dehydrogenase [NAD+] activity and role in NADH oxidation, cell-abiotic substrate adhesion, glycerol biosynthetic process, intracellular accumulation of glycerol	15.8696	11.56	1	4	4	4	519	56.4221	8.19189
	Afu4g06690	Afu4g06690 AspGDID:ASPL0000106383 COORDS:Chr4_A_fumigatus_Af293:1733950-1731132C, translated using codon table 1 (859 amino acids) Uncharacterized ORF; Ortholog(s) have nucleotide binding, ribonucleoside-diphosphate reductase activity, thioredoxin disulfide as acceptor activity	15.6174	6.4	1	4	4	4	859	96.0463	6.66846
	Afu2g01920	Afu2g01920 AspGDID:ASPL0000103022 COORDS:Chr2_A_fumigatus_Af293:479695-481689W, translated using codon table 1 (664 amino acids) Uncharacterized ORF; Ortholog(s) have cytosol localization	15.546	9.19	1	4	4	4	664	74.2475	7.1958
	Afu7g04070	Afu7g04070 AspGDID:ASPL0000110102 COORDS:Chr7_A_fumigatus_Af293:916318-915016C, translated using codon table 1 (369 amino acids) Uncharacterized ORF; Ortholog(s) have 3-deoxy-7-phosphoheptulonate synthase activity, role in aromatic amino acid family biosynthetic process and cytoplasm, nucleus localization	15.4897	14.63	1	3	3	3	369	40.0468	6.7417
	Afu3g10300	Afu3g10300 AspGDID:ASPL0000105428 COORDS:Chr3_A_fumigatus_Af293:2667473-2665767C, translated using codon table 1 (524 amino acids) Uncharacterized ORF; Putative galactokinase with a role in galactose catabolism; transcript up-regulated in conidia exposed to neutrophils	15.4555	11.64	1	4	4	4	524	57.6085	6.65381
	Afu5g11380	Afu5g11380 AspGDID:ASPL0000108197 COORDS:Chr5_A_fumigatus_Af293:2924786-2923943C, translated using codon table 1 (197 amino acids) Uncharacterized ORF; Putative Rho-GDP dissociation inhibitor; transcript and protein levels increased in response to amphotericin B	15.3506	37.56	1	4	4	4	197	22.3004	5.90967
	Afu3g06530	sC AspGDID:ASPL0000105064 COORDS:Chr3_A_fumigatus_Af293:1618981-1616721C, translated using codon table 1 (574 amino acids) Uncharacterized ORF; Putative ATP sulfurylase; sulfate adenylyltransferase; reacts with rabbit immunosera exposed to A. fumigatus conidia; hypoxia repressed protein	15.1818	11.67	1	6	6	6	574	64.2932	7.06396
	Afu1g14850	Afu1g14850 AspGDID:ASPL0000102552 COORDS:Chr1_A_fumigatus_Af293:3980051-3981525W, translated using codon table 1 (437 amino acids) Uncharacterized ORF; Putative acyl-coA dehydrogenase with a predicted role in beta oxidation of fatty acids; transcript up-regulated in conidia exposed to neutrophils	15.1648	13.73	1	3	3	3	437	47.4243	6.94678
	Afu4g06890	cyp51A AspGDID:ASPL0000106403 COORDS:Chr4_A_fumigatus_Af293:1785331-1783713C, translated using codon table 1 (515 amino acids) Verified ORF; 14-alpha sterol demethylase; commonly mutated in drug resistant isolates; putative ortholog of A. nidulans pdmA; transcript induced by exposure to fluconazole and voriconazole; SrbA-regulated during hypoxia	15.1109	13.59	1	3	3	3	515	58.0308	8.52881
	Afu5g05820	Afu5g05820 AspGDID:ASPL0000107659 COORDS:Chr5_A_fumigatus_Af293:1354916-1353658C, translated using codon table 1 (355 amino acids) Uncharacterized ORF; Ortholog(s) have homoserine kinase activity, role in homoserine metabolic process, threonine biosynthetic process and cytoplasm localization	14.9966	22.25	1	6	6	6	355	38.4901	6.7417
	Afu3g07680	Afu3g07680 AspGDID:ASPL0000105174 COORDS:Chr3_A_fumigatus_Af293:1941416-1940148C, translated using codon table 1 (422 amino acids) Uncharacterized ORF; Putative ran GTPase activating protein	14.9842	12.09	1	3	3	4	422	46.1998	4.67822
	Afu2g10660	mpdA AspGDID:ASPL0000103781 COORDS:Chr2_A_fumigatus_Af293:2727506-2726340C, translated using codon table 1 (388 amino acids) Verified ORF; Putative mannitol-1-phosphate dehydrogenase; conidia-enriched protein; protein induced by heat shock; reacts with rabbit immunosera exposed to conidia; no human homolog	14.9125	14.18	1	3	3	3	388	42.9772	5.89697
	Afu6g10470	zpr1 AspGDID:ASPL0000109402 COORDS:Chr6_A_fumigatus_Af293:2596608-2598107W, translated using codon table 1 (475 amino acids) Uncharacterized ORF; Putative zinc finger protein; transcript highly induced during conidial germination	14.8551	11.79	1	4	4	4	475	53.5291	4.66553
	Afu5g02750	Afu5g02750 AspGDID:ASPL0000107455 COORDS:Chr5_A_fumigatus_Af293:720857-719993C, translated using codon table 1 (158 amino acids) Uncharacterized ORF; Cytochrome c oxidase subunit Va with a predicted role in oxidative phosphorylation; induced by exposure to artemisinin	14.7924	33.54	1	4	4	4	158	17.9802	5.68115
	Afu5g02850	Afu5g02850 AspGDID:ASPL0000107464 COORDS:Chr5_A_fumigatus_Af293:754834-756051W, translated using codon table 1 (324 amino acids) Uncharacterized ORF; Has domain(s) with predicted arylformamidase activity and role in tryptophan catabolic process to kynurenine	14.6773	20.68	1	5	5	6	324	36.303	5.21143
	Afu8g05440	atp4 AspGDID:ASPL0000110874 COORDS:Chr8_A_fumigatus_Af293:1265282-1266290W, translated using codon table 1 (274 amino acids) Uncharacterized ORF; Mitochondrial ATPase subunit; hypoxia repressed protein	14.461	20.07	1	4	4	4	274	29.7087	9.34912
	Afu1g15860	Afu1g15860 AspGDID:ASPL0000102649 COORDS:Chr1_A_fumigatus_Af293:4290367-4288413C, translated using codon table 1 (591 amino acids) Uncharacterized ORF; Has domain(s) with predicted role in intracellular protein transport, retrograde vesicle-mediated transport, Golgi to ER, transport, vesicle-mediated transport and COPI vesicle coat, clathrin adaptor complex localization	14.422	10.32	1	4	4	4	591	65.3323	5.87158
	Afu1g13710	Afu1g13710 AspGDID:ASPL0000102439 COORDS:Chr1_A_fumigatus_Af293:3650512-3647224C, translated using codon table 1 (1064 amino acids) Uncharacterized ORF; Isoleucyl-tRNA synthetase, cytoplasmic	14.2687	5.45	1	4	4	4	1064	122.315	6.43018
	Afu1g16480	Afu1g16480 AspGDID:ASPL0000102711 COORDS:Chr1_A_fumigatus_Af293:4473265-4471335C, translated using codon table 1 (508 amino acids) Uncharacterized ORF; Ortholog(s) have mitochondrion localization	14.1967	11.42	1	4	4	4	508	56.9633	7.21045
	Afu5g10560	Afu5g10560 AspGDID:ASPL0000108120 COORDS:Chr5_A_fumigatus_Af293:2704203-2703448C, translated using codon table 1 (196 amino acids) Uncharacterized ORF; Cytochrome c oxidase subunit V	14.041	25	1	4	4	4	196	22.1855	9.94971
	Afu6g03590	mcsA AspGDID:ASPL0000108814 COORDS:Chr6_A_fumigatus_Af293:783347-784866W, translated using codon table 1 (465 amino acids) Verified ORF; Methylcitrate synthase; catalyses the condensation of propionyl-CoA and oxaloacetate to methylcitrate; conidia-enriched protein; mutants killed more readily by alveolar macrophages and show decreased virulence in mice	13.9273	14.84	1	5	5	5	465	51.3799	8.93896
	Afu5g07890	Afu5g07890 AspGDID:ASPL0000107861 COORDS:Chr5_A_fumigatus_Af293:1979250-1978604C, translated using codon table 1 (149 amino acids) Uncharacterized ORF; Putative single-stranded DNA binding protein family member	13.6591	27.52	1	3	3	4	149	16.2432	9.68604
	Afu5g00720	Afu5g00720 AspGDID:ASPL0000107256 COORDS:Chr5_A_fumigatus_Af293:204504-203702C, translated using codon table 1 (248 amino acids) Uncharacterized ORF; Has domain(s) with predicted N-acetyltransferase activity	13.6523	20.16	1	4	4	4	248	29.0426	5.32568
	Afu8g04810	Afu8g04810 AspGDID:ASPL0000110815 COORDS:Chr8_A_fumigatus_Af293:1104248-1103015C, translated using codon table 1 (336 amino acids) Uncharacterized ORF; Ortholog(s) have role in circadian regulation of gene expression, conidium formation, establishment or maintenance of bipolar cell polarity regulating cell shape and protein phosphorylation, <a href="#GOsection">more</a>	13.3909	8.04	1	2	2	3	336	39.5131	7.31299
	Afu4g12850	clxA AspGDID:ASPL0000106991 COORDS:Chr4_A_fumigatus_Af293:3365625-3367567W, translated using codon table 1 (563 amino acids) Verified ORF; Calnexin, ER membrane chaperone involved in folding of glycoproteins directed to the secretory pathway; hypoxia repressed; enriched in dormant conidia	13.1882	7.64	1	4	4	4	563	61.8151	5.07178
	Afu5g12570	Afu5g12570 AspGDID:ASPL0000108311 COORDS:Chr5_A_fumigatus_Af293:3257995-3258330W, translated using codon table 1 (83 amino acids) Uncharacterized ORF; Ortholog(s) have RNA binding activity, role in mRNA splicing, via spliceosome and U4/U6 x U5 tri-snRNP complex, U6 snRNP, cytoplasm, nucleolus, small nucleolar ribonucleoprotein complex localization	13.1587	51.81	1	2	2	2	83	9.3466	4.37354
	Afu6g06345	Afu6g06345 AspGDID:ASPL0000108995 COORDS:Chr6_A_fumigatus_Af293:1347575-1348344W, translated using codon table 1 (205 amino acids) Uncharacterized ORF; Ortholog(s) have 6,7-dimethyl-8-ribityllumazine synthase activity, role in riboflavin biosynthetic process and mitochondrial intermembrane space, nucleus localization	12.8365	30.24	1	3	3	3	205	21.5393	6.1001
	Afu2g03490	Afu2g03490 AspGDID:ASPL0000103178 COORDS:Chr2_A_fumigatus_Af293:921519-923827W, translated using codon table 1 (645 amino acids) Uncharacterized ORF; Putative calcium/calmodulin-dependent protein kinase; calcium induced; transcript induced by exposure to human airway epithelial cells	12.8064	8.68	1	3	3	3	645	72.0815	6.87354
	Afu4g11050	Afu4g11050 AspGDID:ASPL0000106815 COORDS:Chr4_A_fumigatus_Af293:2878131-2879794W, translated using codon table 1 (496 amino acids) Uncharacterized ORF; Putative NADH-ubiquinone oxidoreductase, subunit F involved in oxidative phosphorylation; induced by exposure to artemisinin	12.7682	11.29	1	4	4	4	496	54.5252	8.1333
	Afu1g08790	Afu1g08790 AspGDID:ASPL0000101945 COORDS:Chr1_A_fumigatus_Af293:2260124-2263969W, translated using codon table 1 (1072 amino acids) Uncharacterized ORF; Ortholog(s) have nuclear export signal receptor activity	12.3322	4.76	1	5	5	5	1072	123.425	5.43994
	Afu1g15000	Afu1g15000 AspGDID:ASPL0000102567 COORDS:Chr1_A_fumigatus_Af293:4029547-4031693W, translated using codon table 1 (643 amino acids) Uncharacterized ORF; Putative isopropylmalate synthase; transcript highly induced during conidial germination; SrbA-regulated during hypoxia	12.213	8.09	1	5	5	5	643	71.1504	5.68115
	Afu4g12870	Afu4g12870 AspGDID:ASPL0000106993 COORDS:Chr4_A_fumigatus_Af293:3368445-3370387W, translated using codon table 1 (602 amino acids) Uncharacterized ORF; Putative methylmalonate-semialdehyde dehydrogenase; transcript up-regulated in conidia exposed to neutrophils	12.1805	5.32	1	3	3	3	602	63.8246	8.03076
	Afu7g02230	Afu7g02230 AspGDID:ASPL0000110018 COORDS:Chr7_A_fumigatus_Af293:599410-600851W, translated using codon table 1 (418 amino acids) Uncharacterized ORF; Ortholog(s) have mRNA binding activity, role in arginine catabolic process, positive regulation of cellular response to oxidative stress, positive regulation of nuclear-transcribed mRNA poly(A) tail shortening and cytosol localization	11.9457	9.57	1	3	3	3	418	44.8172	5.75732
	Afu5g10610	rip1 AspGDID:ASPL0000108125 COORDS:Chr5_A_fumigatus_Af293:2715644-2714448C, translated using codon table 1 (298 amino acids) Uncharacterized ORF; Ubiquinol-cytochrome c reductase iron-sulphur subunit precursor with a predicted role in oxidative phosphorylation; hypoxia induced protein; induced by exposure to artemisinin; SrbA-regulated during hypoxia	11.8755	18.79	1	3	3	3	298	32.5887	8.95361
	Afu1g10810	Afu1g10810 AspGDID:ASPL0000102144 COORDS:Chr1_A_fumigatus_Af293:2821017-2822416W, translated using codon table 1 (391 amino acids) Uncharacterized ORF; Ortholog(s) have role in calcium ion transport into cytosol and cytosol, plasma membrane localization	11.5905	11	1	3	3	3	391	44.1257	6.96143
	Afu5g11560	Afu5g11560 AspGDID:ASPL0000108213 COORDS:Chr5_A_fumigatus_Af293:2965961-2964433C, translated using codon table 1 (439 amino acids) Uncharacterized ORF; Ortholog(s) have ATP binding activity	11.4443	10.71	1	2	2	2	439	47.6211	6.55127
	Afu3g13480	Afu3g13480 AspGDID:ASPL0000105743 COORDS:Chr3_A_fumigatus_Af293:3565478-3566600W, translated using codon table 1 (308 amino acids) Uncharacterized ORF; Translation initiation factor 2 alpha subunit	11.403	17.21	1	4	4	4	308	35.014	5.8208
	Afu3g09910	Afu3g09910 AspGDID:ASPL0000105389 COORDS:Chr3_A_fumigatus_Af293:2542185-2543380W, translated using codon table 1 (331 amino acids) Uncharacterized ORF; Ortholog(s) have phosphatidylcholine transporter activity and role in Golgi to plasma membrane transport, ascospore formation, mitotic cytokinesis, phospholipid transport, regulation of filamentous growth	11.2925	11.18	1	2	2	3	331	37.3006	5.51611
	Afu5g12260	tigA AspGDID:ASPL0000108282 COORDS:Chr5_A_fumigatus_Af293:3183118-3184297W, translated using codon table 1 (368 amino acids) Uncharacterized ORF; Putative disulfide isomerase	11.2332	10.87	1	2	2	3	368	40.2289	6.44287
	Afu5g08130	Afu5g08130 AspGDID:ASPL0000107885 COORDS:Chr5_A_fumigatus_Af293:2058746-2057023C, translated using codon table 1 (478 amino acids) Uncharacterized ORF; Ortholog(s) have P-P-bond-hydrolysis-driven protein transmembrane transporter activity, peptide transporter activity, signal sequence binding activity	11.1283	9.83	1	4	4	4	478	52.1877	8.19189
	Afu5g01440	Afu5g01440 AspGDID:ASPL0000107324 COORDS:Chr5_A_fumigatus_Af293:377687-376891C, translated using codon table 1 (202 amino acids) Uncharacterized ORF; Ortholog(s) have thioredoxin peroxidase activity, role in cell redox homeostasis, cellular response to oxidative stress, response to metal ion and peroxisome, plasma membrane localization	11.1189	18.81	1	3	3	3	202	21.9364	8.35303
	Afu2g09850	Afu2g09850 AspGDID:ASPL0000103701 COORDS:Chr2_A_fumigatus_Af293:2516744-2518045W, translated using codon table 1 (355 amino acids) Uncharacterized ORF; Putative oxidoreductase, 2-nitropropane dioxygenase family; transcript up-regulated in conidia exposed to neutrophils	11.1175	11.27	1	3	3	3	355	37.6787	7.02002
	Afu2g01040	Afu2g01040 AspGDID:ASPL0000102935 COORDS:Chr2_A_fumigatus_Af293:239825-238336C, translated using codon table 1 (379 amino acids) Uncharacterized ORF; Putative formaldehyde dehydrogenase; transcript up-regulated in conidia exposed to neutrophils	10.9197	10.82	1	2	2	2	379	40.0182	7.26904
	Afu4g09750	Afu4g09750 AspGDID:ASPL0000106689 COORDS:Chr4_A_fumigatus_Af293:2539039-2539733W, translated using codon table 1 (187 amino acids) Uncharacterized ORF; Ortholog(s) have role in aerobic respiration and mitochondrial nucleoid, mitochondrial ribosome localization	10.8702	18.72	1	2	2	2	187	19.7125	8.73389
	Afu2g05340	gel4 AspGDID:ASPL0000103358 COORDS:Chr2_A_fumigatus_Af293:1487091-1488862W, translated using codon table 1 (532 amino acids) Verified ORF; Essential 1,3-beta-glucanosyltransferase, GPI-anchored to the plasma membrane; constitutively expressed during hyphal growth; hypoxia induced protein	10.7067	8.27	1	3	3	3	532	57.0832	5.0083
	Afu8g07130	Afu8g07130 AspGDID:ASPL0000111039 COORDS:Chr8_A_fumigatus_Af293:1747018-1747937W, translated using codon table 1 (267 amino acids) Verified ORF; AhpC/TSA family thioredoxin peroxidase; conidia-enriched protein; transcript up-regulated in conidia exposed to neutrophils and to human airway epithelial cells	10.646	11.24	1	3	3	3	267	29.5877	9.24658
	Afu5g08270	Afu5g08270 AspGDID:ASPL0000107899 COORDS:Chr5_A_fumigatus_Af293:2100834-2100024C, translated using codon table 1 (244 amino acids) Uncharacterized ORF; Putative HAD superfamily hydrolase; hypoxia repressed protein	10.5558	16.8	1	3	3	3	244	27.343	5.04639
	Afu1g09280	ptcB AspGDID:ASPL0000101994 COORDS:Chr1_A_fumigatus_Af293:2407312-2409143W, translated using codon table 1 (429 amino acids) Verified ORF; Putative type 2C protein phosphatase (PP2C) involved in dephosphorylation of SakA MAP kinase in response to osmotic stress	10.5412	9.79	1	3	3	3	429	46.5624	4.79248
	Afu1g13740	Afu1g13740 AspGDID:ASPL0000102442 COORDS:Chr1_A_fumigatus_Af293:3658931-3663766W, translated using codon table 1 (1578 amino acids) Uncharacterized ORF; Predicted pentafunctional polypeptide; predicted essential gene	10.484	4.44	1	4	4	4	1578	171.364	6.68311
	Afu1g15960	Afu1g15960 AspGDID:ASPL0000102659 COORDS:Chr1_A_fumigatus_Af293:4331468-4333260W, translated using codon table 1 (554 amino acids) Uncharacterized ORF; Ortholog(s) have flavin adenine dinucleotide binding, glutathione transferase activity, glutathione-disulfide reductase activity	10.3202	9.03	1	4	4	4	554	60.0714	8.70459
	Afu5g07050	Afu5g07050 AspGDID:ASPL0000107780 COORDS:Chr5_A_fumigatus_Af293:1745205-1746800W, translated using codon table 1 (463 amino acids) Uncharacterized ORF; Proteasome regulatory particle subunit; transcript induced by exposure to human airway epithelial cells	10.0503	8.21	1	3	3	3	463	51.4175	5.75732
	Afu1g06210	agm1 AspGDID:ASPL0000101789 COORDS:Chr1_A_fumigatus_Af293:1791710-1793700W, translated using codon table 1 (566 amino acids) Verified ORF; N-acetylphosphoglucosamine mutase, involved in chitin biosynthesis; essential	9.99138	9.54	1	4	4	4	566	61.4774	6.11279
	Afu6g03750	Afu6g03750 AspGDID:ASPL0000108830 COORDS:Chr6_A_fumigatus_Af293:827896-829831W, translated using codon table 1 (583 amino acids) Uncharacterized ORF; Ortholog(s) have amidophosphoribosyltransferase activity, role in 'de novo' IMP biosynthetic process, adenine metabolic process and cytoplasm localization	9.97455	6	1	2	2	2	583	64.0024	6.58057
	Afu2g15070	Afu2g15070 AspGDID:ASPL0000104222 COORDS:Chr2_A_fumigatus_Af293:3981607-3982633W, translated using codon table 1 (280 amino acids) Uncharacterized ORF; Ortholog(s) have polyubiquitin binding, structural molecule activity and role in negative regulation of protein catabolic process, ubiquitin-dependent protein catabolic process	9.957	12.86	1	2	2	2	280	29.984	5.13525
	Afu3g08940	Afu3g08940 AspGDID:ASPL0000105295 COORDS:Chr3_A_fumigatus_Af293:2286027-2286949W, translated using codon table 1 (280 amino acids) Uncharacterized ORF; Ortholog(s) have role in ubiquitin-dependent protein catabolic process and nucleus, proteasome regulatory particle, lid subcomplex, proteasome storage granule localization	9.95453	13.21	1	3	3	3	280	31.1431	4.99561
	Afu3g11350	arsA AspGDID:ASPL0000105533 COORDS:Chr3_A_fumigatus_Af293:2972476-2973613W, translated using codon table 1 (340 amino acids) Uncharacterized ORF; ATPase; proteins are recognized and bound by Get3p then delivered to the ER	9.91494	10.59	1	2	2	2	340	37.416	5.09717
	Afu7g05870	pre8 AspGDID:ASPL0000110279 COORDS:Chr7_A_fumigatus_Af293:1438165-1439254W, translated using codon table 1 (282 amino acids) Uncharacterized ORF; Putative proteasome subunit; immunoreactive protein; reacts with rabbit immunosera exposed to A. fumigatus conidia	9.77933	14.18	1	2	2	2	282	30.4438	5.5542
	Afu5g03520	Afu5g03520 AspGDID:ASPL0000107530 COORDS:Chr5_A_fumigatus_Af293:949870-951084W, translated using codon table 1 (323 amino acids) Verified ORF; Immunoreactive secreted protein	9.72958	11.76	1	3	3	3	323	35.4962	6.46826
	Afu2g11340	Afu2g11340 AspGDID:ASPL0000103849 COORDS:Chr2_A_fumigatus_Af293:2922123-2921251C, translated using codon table 1 (248 amino acids) Uncharacterized ORF; Ortholog(s) have role in intracellular sterol transport and fungal-type vacuole lumen localization	9.60522	16.13	1	4	4	4	248	27.2728	5.93506
	Afu2g05510	Afu2g05510 AspGDID:ASPL0000103374 COORDS:Chr2_A_fumigatus_Af293:1537597-1538232W, translated using codon table 1 (101 amino acids) Uncharacterized ORF; Ortholog(s) have proton-transporting ATP synthase activity, rotational mechanism, proton-transporting ATPase activity, rotational mechanism activity and role in ATP synthesis coupled proton transport	9.42468	31.68	1	3	3	3	101	11.1599	10.4331
	Afu5g10640	Afu5g10640 AspGDID:ASPL0000108128 COORDS:Chr5_A_fumigatus_Af293:2721762-2723271W, translated using codon table 1 (391 amino acids) Uncharacterized ORF; Ortholog(s) have tyrosine-tRNA ligase activity, role in tyrosyl-tRNA aminoacylation and cytosol, nucleus localization	9.38658	14.32	1	5	5	5	391	43.5878	6.58057
	Afu2g03590	Afu2g03590 AspGDID:ASPL0000103186 COORDS:Chr2_A_fumigatus_Af293:956883-956337C, translated using codon table 1 (88 amino acids) Uncharacterized ORF; Putative ribosomal protein S21e; transcript induced by exposure to human airway epithelial cells	9.30743	36.36	1	3	3	3	88	10.0029	8.30908
	Afu8g01670	cat2 AspGDID:ASPL0000110606 COORDS:Chr8_A_fumigatus_Af293:441545-439266C, translated using codon table 1 (759 amino acids) Verified ORF; Putative bifunctional catalase-peroxidase; induction in response to hydrogen peroxide Yap1-dependent; transcript induced by exposure to human airway epithelial cells; SrbA-regulated during hypoxia	9.28091	5.8	1	3	3	3	759	83.7098	6.58057
	Afu2g01750	Afu2g01750 AspGDID:ASPL0000103005 COORDS:Chr2_A_fumigatus_Af293:429523-427825C, translated using codon table 1 (461 amino acids) Uncharacterized ORF; Has domain(s) with predicted aminopeptidase activity, metalloexopeptidase activity and role in cellular process, proteolysis	9.14262	7.16	1	2	2	2	461	50.7856	5.96045
	Afu3g10630	Afu3g10630 AspGDID:ASPL0000105461 COORDS:Chr3_A_fumigatus_Af293:2747083-2747630W, translated using codon table 1 (123 amino acids) Uncharacterized ORF; Ortholog(s) have mitochondrion localization	9.05274	33.33	1	2	2	2	123	13.5657	4.88135
	Afu2g03400	Afu2g03400 AspGDID:ASPL0000103169 COORDS:Chr2_A_fumigatus_Af293:896513-897792W, translated using codon table 1 (335 amino acids) Uncharacterized ORF; Ortholog(s) have ubiquitin-specific protease activity and role in cellular response to drug, mitochondrial fission, peroxisome fission, proteasome-mediated ubiquitin-dependent protein catabolic process, protein deubiquitination	8.99285	11.04	1	3	3	3	335	37.4139	6.20166
	Afu2g03580	Afu2g03580 AspGDID:ASPL0000103185 COORDS:Chr2_A_fumigatus_Af293:953968-955580W, translated using codon table 1 (518 amino acids) Uncharacterized ORF; Ortholog(s) have phenylalanine-tRNA ligase activity, role in phenylalanyl-tRNA aminoacylation and cytosol, phenylalanine-tRNA ligase complex localization	8.98297	11.58	1	5	5	5	518	58.509	7.44482
	Afu2g15870	Afu2g15870 AspGDID:ASPL0000104304 COORDS:Chr2_A_fumigatus_Af293:4194874-4191631C, translated using codon table 1 (1039 amino acids) Uncharacterized ORF; Ortholog(s) have cytosol, nuclear envelope localization	8.94278	4.33	1	3	3	3	1039	114.292	4.65283
	Afu6g12680	Afu6g12680 AspGDID:ASPL0000109611 COORDS:Chr6_A_fumigatus_Af293:3202825-3203845W, translated using codon table 1 (135 amino acids) Uncharacterized ORF; Ortholog(s) have hydrolase activity, role in nucleotide metabolic process and cytoplasm, nucleus localization	8.82332	22.22	1	3	3	3	135	14.9728	6.87354
	Afu4g10010	Afu4g10010 AspGDID:ASPL0000106715 COORDS:Chr4_A_fumigatus_Af293:2593720-2595242W, translated using codon table 1 (487 amino acids) Uncharacterized ORF; Ortholog(s) have heat shock protein binding activity, role in protein folding, regulation of mitotic cell cycle and cytosol, nucleus localization	8.82073	7.8	1	2	2	2	487	54.4855	4.99561
	Afu8g03920	Afu8g03920 AspGDID:ASPL0000361923 COORDS:Chr8_A_fumigatus_Af293:837589-837167C, translated using codon table 1 (103 amino acids) Uncharacterized ORF; Ortholog(s) have histone binding, protein complex binding, protein homodimerization activity, protein kinase activator activity, ubiquitin binding activity	8.7621	29.13	1	3	3	3	103	12.5234	6.0874
	Afu3g13820	Afu3g13820 AspGDID:ASPL0000105775 COORDS:Chr3_A_fumigatus_Af293:3651038-3650223C, translated using codon table 1 (201 amino acids) Uncharacterized ORF; Putative HET-C2 protein; transcript induced by exposure to human airway epithelial cells	8.75737	12.94	1	2	2	2	201	22.1986	6.94678
	Afu3g09700	Afu3g09700 AspGDID:ASPL0000105368 COORDS:Chr3_A_fumigatus_Af293:2482012-2478686C, translated using codon table 1 (1019 amino acids) Uncharacterized ORF; Ortholog(s) have cytosol localization	8.56555	3.43	1	2	2	2	1019	110.14	6.66846
	Afu4g03650	Afu4g03650 AspGDID:ASPL0000106184 COORDS:Chr4_A_fumigatus_Af293:1028974-1030431W, translated using codon table 1 (446 amino acids) Uncharacterized ORF; Ribosome associated DnaJ chaperone Zuotin	8.37671	8.3	1	3	3	3	446	51.2243	8.19189
	Afu8g05530	osm1 AspGDID:ASPL0000110883 COORDS:Chr8_A_fumigatus_Af293:1293416-1295561W, translated using codon table 1 (630 amino acids) Verified ORF; Putative fumarate reductase; conidia-enriched protein; hypoxia repressed protein; transcript up-regulated in conidia exposed to neutrophils; transcript downregulated in response to hypoxia	8.29271	5.56	1	2	2	2	630	67.8497	7.51807
	Afu8g04340	Afu8g04340 AspGDID:ASPL0000110769 COORDS:Chr8_A_fumigatus_Af293:975505-974078C, translated using codon table 1 (412 amino acids) Uncharacterized ORF; Putative cystathionine gamma-lyase; transcript induced by exposure to human airway epithelial cells	8.28026	7.77	1	2	2	2	412	43.628	6.80029
	Afu6g06580	Afu6g06580 AspGDID:ASPL0000109019 COORDS:Chr6_A_fumigatus_Af293:1433532-1432446C, translated using codon table 1 (269 amino acids) Uncharacterized ORF; Ortholog(s) have phosphomannomutase activity, role in ER to Golgi vesicle-mediated transport, establishment or maintenance of cell polarity, nuclear envelope organization, protein targeting to ER and cytosol, nucleus localization	8.22334	10.04	1	3	3	3	269	30.5733	5.66846
	Afu5g09910	Afu5g09910 AspGDID:ASPL0000108059 COORDS:Chr5_A_fumigatus_Af293:2564144-2563392C, translated using codon table 1 (217 amino acids) Uncharacterized ORF; Putative p-nitroreductase family protein; protein induced by heat shock; Yap1-dependent induction in response to hydrogen peroxide; induced by gliotoxin exposure	8.17438	15.21	1	3	3	3	217	24.2985	5.90967
	Afu7g01840	Afu7g01840 AspGDID:ASPL0000109979 COORDS:Chr7_A_fumigatus_Af293:496331-491364C, translated using codon table 1 (1522 amino acids) Uncharacterized ORF; Ortholog(s) have Golgi apparatus, cell tip, cytoplasmic vesicle, endoplasmic reticulum, plasma membrane localization	8.15996	4.99	1	4	4	4	1522	168.412	6.21436
	Afu5g07000	Afu5g07000 AspGDID:ASPL0000107775 COORDS:Chr5_A_fumigatus_Af293:1735022-1736346W, translated using codon table 1 (360 amino acids) Uncharacterized ORF; Puttaive NAD binding Rossmann fold oxidoreductase; transcript up-regulated in conidia exposed to neutrophils	8.15409	11.11	1	3	3	3	360	39.9447	7.03467
	Afu2g10620	Afu2g10620 AspGDID:ASPL0000103777 COORDS:Chr2_A_fumigatus_Af293:2721682-2719389C, translated using codon table 1 (637 amino acids) Uncharacterized ORF; Ortholog(s) have protein serine/threonine kinase activity	8.1494	6.44	1	2	2	2	637	70.882	7.6499
	Afu5g07300	Afu5g07300 AspGDID:ASPL0000107804 COORDS:Chr5_A_fumigatus_Af293:1814759-1815768W, translated using codon table 1 (260 amino acids) Uncharacterized ORF; Electron transfer flavoprotein, beta subunit	8.07278	10	1	2	2	2	260	28.2232	8.96826
	Afu6g04970	Afu6g04970 AspGDID:ASPL0000108951 COORDS:Chr6_A_fumigatus_Af293:1181194-1182540W, translated using codon table 1 (428 amino acids) Uncharacterized ORF; Ortholog(s) have O-phospho-L-serine:2-oxoglutarate aminotransferase activity, role in L-serine biosynthetic process, purine nucleobase biosynthetic process and cytosol localization	8.06065	8.41	1	2	2	2	428	46.8644	6.81494
	Afu2g06000	Afu2g06000 AspGDID:ASPL0000103423 COORDS:Chr2_A_fumigatus_Af293:1696635-1700101W, translated using codon table 1 (1093 amino acids) Uncharacterized ORF; Putative NAD+ dependent glutamate dehydrogenase; transcript induced during conidial germination	8.00522	5.4	1	4	4	4	1093	123.281	6.55127
	Afu6g09330	Afu6g09330 AspGDID:ASPL0000109287 COORDS:Chr6_A_fumigatus_Af293:2227723-2229437W, translated using codon table 1 (468 amino acids) Uncharacterized ORF; Protein of unknown function	7.92675	8.76	1	3	3	3	468	54.5045	5.021
	Afu2g08970	Afu2g08970 AspGDID:ASPL0000103615 COORDS:Chr2_A_fumigatus_Af293:2301289-2299406C, translated using codon table 1 (519 amino acids) Uncharacterized ORF; Ortholog(s) have cytosol localization	7.91387	5.39	1	2	2	2	519	55.0988	5.97314
	Afu2g14060	Afu2g14060 AspGDID:ASPL0000104121 COORDS:Chr2_A_fumigatus_Af293:3677571-3676423C, translated using codon table 1 (309 amino acids) Uncharacterized ORF; Ortholog(s) have endoplasmic reticulum, plasma membrane localization	7.90121	11.33	1	3	3	3	309	33.7787	8.35303
	Afu1g09970	Afu1g09970 AspGDID:ASPL0000102063 COORDS:Chr1_A_fumigatus_Af293:2578608-2579924W, translated using codon table 1 (365 amino acids) Uncharacterized ORF; Ortholog(s) have role in ascospore formation, cellular response to cadmium ion, detoxification of cadmium ion	7.73667	12.33	1	3	3	3	365	40.9887	6.3667
	Afu4g07910	Afu4g07910 AspGDID:ASPL0000106506 COORDS:Chr4_A_fumigatus_Af293:2067034-2063752C, translated using codon table 1 (1065 amino acids) Uncharacterized ORF; Putative zinc-dependent peptidase	7.7066	3.1	1	2	2	2	1065	118.489	5.64307
	Afu6g04790	Afu6g04790 AspGDID:ASPL0000108933 COORDS:Chr6_A_fumigatus_Af293:1122936-1123878W, translated using codon table 1 (262 amino acids) Uncharacterized ORF; Ortholog(s) have role in proteasomal ubiquitin-independent protein catabolic process, proteasome-mediated ubiquitin-dependent protein catabolic process	7.64904	12.21	1	3	3	3	262	28.7374	5.2749
	Afu2g10920	Afu2g10920 AspGDID:ASPL0000103807 COORDS:Chr2_A_fumigatus_Af293:2813917-2812855C, translated using codon table 1 (294 amino acids) Uncharacterized ORF; Putative enoyl-CoA hydratase/isomerase family protein with a predicted role in beta oxidation of fatty acids; transcript up-regulated in conidia exposed to neutrophils	7.50769	12.93	1	3	3	3	294	31.5663	8.55811
	Afu1g04890	Afu1g04890 AspGDID:ASPL0000101658 COORDS:Chr1_A_fumigatus_Af293:1385941-1386519W, translated using codon table 1 (127 amino acids) Uncharacterized ORF; Ortholog(s) have ARF guanyl-nucleotide exchange factor activity, role in SRP-dependent cotranslational protein targeting to membrane and Ssh1 translocon complex localization	7.48011	33.86	1	2	2	2	127	12.6777	11.3999
	Afu2g08280	maeA AspGDID:ASPL0000103547 COORDS:Chr2_A_fumigatus_Af293:2135230-2132931C, translated using codon table 1 (661 amino acids) Uncharacterized ORF; Putative NADP-dependent malic enzyme	7.45233	5.75	1	2	2	2	661	72.787	6.80029
	Afu1g06190	rmtA AspGDID:ASPL0000101787 COORDS:Chr1_A_fumigatus_Af293:1789312-1787900C, translated using codon table 1 (353 amino acids) Uncharacterized ORF; Histone H4 arginine methyltransferase	7.44497	6.8	1	2	2	2	353	40.258	5.2749
	Afu2g06040	Afu2g06040 AspGDID:ASPL0000103427 COORDS:Chr2_A_fumigatus_Af293:1706686-1708648W, translated using codon table 1 (612 amino acids) Uncharacterized ORF; Putative actin cortical patch component	7.3851	4.9	1	2	2	2	612	65.1426	6.41748
	Afu1g02070	Afu1g02070 AspGDID:ASPL0000101377 COORDS:Chr1_A_fumigatus_Af293:611102-612423W, translated using codon table 1 (319 amino acids) Uncharacterized ORF; Cytochrome C1	7.29642	9.09	1	2	2	2	319	35.1036	8.22119
	Afu6g10610	Afu6g10610 AspGDID:ASPL0000109416 COORDS:Chr6_A_fumigatus_Af293:2625814-2626707W, translated using codon table 1 (272 amino acids) Uncharacterized ORF; Putative ribose 5-phosphate isomerase A	7.26463	13.6	1	3	3	3	272	28.359	6.25244
	Afu6g09070	Afu6g09070 AspGDID:ASPL0000109262 COORDS:Chr6_A_fumigatus_Af293:2156209-2154962C, translated using codon table 1 (415 amino acids) Uncharacterized ORF; 3'(2'),5';-bisphosphate nucleotidase; hypoxia repressed protein; predicted essential gene	7.24063	7.71	1	3	3	3	415	44.1318	5.8335
	Afu6g07760	Afu6g07760 AspGDID:ASPL0000109136 COORDS:Chr6_A_fumigatus_Af293:1770437-1772048W, translated using codon table 1 (492 amino acids) Uncharacterized ORF; Ortholog(s) have structural molecule activity	7.16637	6.3	1	2	2	2	492	54.4651	6.49365
	Afu1g09470	Afu1g09470 AspGDID:ASPL0000102013 COORDS:Chr1_A_fumigatus_Af293:2448655-2447399C, translated using codon table 1 (386 amino acids) Uncharacterized ORF; Putative class V aminotransferase; transcript up-regulated in conidia exposed to neutrophils	7.13354	6.99	1	2	2	2	386	41.8237	6.96143
	Afu1g09840	tim44 AspGDID:ASPL0000102050 COORDS:Chr1_A_fumigatus_Af293:2554479-2552871C, translated using codon table 1 (515 amino acids) Uncharacterized ORF; Mitochondrial inner membrane translocase subunit	7.09724	6.21	1	2	2	2	515	57.7095	9.11475
	Afu4g07340	Afu4g07340 AspGDID:ASPL0000106448 COORDS:Chr4_A_fumigatus_Af293:1905396-1909011W, translated using codon table 1 (1088 amino acids) Uncharacterized ORF; Ortholog(s) have cytoplasm, nucleus localization	6.94057	2.48	1	2	2	2	1088	124.123	5.49072
	Afu2g14210	ilv3 AspGDID:ASPL0000104136 COORDS:Chr2_A_fumigatus_Af293:3721264-3723226W, translated using codon table 1 (606 amino acids) Verified ORF; Putative mitochondrial dihydroxy acid dehydratase; hypoxia induced protein; induced by exposure to human airway epithelial cells; required for virulence	6.91514	4.13	1	2	2	2	606	64.7161	7.6499
	Afu2g09310	Afu2g09310 AspGDID:ASPL0000103649 COORDS:Chr2_A_fumigatus_Af293:2382162-2382540W, translated using codon table 1 (71 amino acids) Uncharacterized ORF; Has domain(s) with predicted proton-transporting ATP synthase activity, rotational mechanism, proton-transporting ATPase activity, rotational mechanism activity and role in ATP synthesis coupled proton transport	6.87732	30.99	1	2	2	2	71	7.85714	10.4185
	Afu5g02090	Afu5g02090 AspGDID:ASPL0000107389 COORDS:Chr5_A_fumigatus_Af293:531520-531007C, translated using codon table 1 (144 amino acids) Uncharacterized ORF; Ortholog(s) have role in meiotic chromosome segregation and cytosol, nucleus localization	6.83156	18.75	1	2	2	2	144	16.3113	7.50342
	Afu3g10700	Afu3g10700 AspGDID:ASPL0000105468 COORDS:Chr3_A_fumigatus_Af293:2775082-2775739W, translated using codon table 1 (193 amino acids) Uncharacterized ORF; Ortholog(s) have mRNA binding, structural molecule activity and role in Arp2/3 complex-mediated actin nucleation, actin cortical patch assembly, cellular response to drug, mitochondrion inheritance	6.75279	13.47	1	2	2	2	193	20.5543	5.60498
	Afu6g08920	Afu6g08920 AspGDID:ASPL0000109248 COORDS:Chr6_A_fumigatus_Af293:2125824-2122684C, translated using codon table 1 (1046 amino acids) Uncharacterized ORF; Assimilatory sulfite reductase	6.719	2.58	1	2	2	2	1046	114.548	5.13525
	Afu3g11170	Afu3g11170 AspGDID:ASPL0000105515 COORDS:Chr3_A_fumigatus_Af293:2928974-2931529W, translated using codon table 1 (759 amino acids) Uncharacterized ORF; Ortholog(s) have sequence-specific DNA binding activity and role in carotenoid biosynthetic process, circadian rhythm, conidiophore development	6.67132	3.95	1	2	2	2	759	84.1513	6.7124
	Afu3g11300	prs2 AspGDID:ASPL0000105528 COORDS:Chr3_A_fumigatus_Af293:2959483-2958408C, translated using codon table 1 (254 amino acids) Uncharacterized ORF; Putative proteasome component	6.64891	8.66	1	2	2	2	254	27.9201	6.37939
	Afu4g11260	Afu4g11260 AspGDID:ASPL0000106835 COORDS:Chr4_A_fumigatus_Af293:2946536-2947803W, translated using codon table 1 (352 amino acids) Uncharacterized ORF; Ortholog(s) have role in cellular response to cadmium ion, detoxification of cadmium ion and cytosol, nucleus localization	6.64762	9.38	1	2	2	2	352	39.9157	7.54736
	Afu5g05550	Afu5g05550 AspGDID:ASPL0000107633 COORDS:Chr5_A_fumigatus_Af293:1292269-1297322W, translated using codon table 1 (1572 amino acids) Uncharacterized ORF; Class V myosin; transcript induced by exposure to human airway epithelial cells	6.6304	1.97	1	2	2	2	1572	179.848	6.91748
	Afu2g13720	Afu2g13720 AspGDID:ASPL0000104087 COORDS:Chr2_A_fumigatus_Af293:3562458-3563730W, translated using codon table 1 (374 amino acids) Uncharacterized ORF; Ortholog(s) have RNA polymerase I activity, RNA polymerase III activity	6.62459	8.82	1	2	2	2	374	42.3207	6.55127
	Afu6g06350	Afu6g06350 AspGDID:ASPL0000108996 COORDS:Chr6_A_fumigatus_Af293:1349712-1348557C, translated using codon table 1 (298 amino acids) Uncharacterized ORF; Proteasome subunit alpha type 3; reacts with rabbit immunosera exposed to A. fumigatus conidia	6.55754	11.41	1	3	3	3	298	31.8111	5.21143
	Afu4g14380	Afu4g14380 AspGDID:ASPL0000107143 COORDS:Chr4_A_fumigatus_Af293:3803235-3802361C, translated using codon table 1 (266 amino acids) Verified ORF; Protein of unknown function; transcript downregulated in response to voriconazole	6.46305	9.77	1	2	2	2	266	29.9935	7.86963
	Afu3g12530	pkhB AspGDID:ASPL0000105649 COORDS:Chr3_A_fumigatus_Af293:3318837-3312900C, translated using codon table 1 (1937 amino acids) Uncharacterized ORF; Putative sensor histidine kinase/response regulator; transcript induced by exposure to human airway epithelial cells	6.43868	1.08	1	2	2	2	1937	213.382	6.52197
	Afu2g02780	Afu2g02780 AspGDID:ASPL0000103108 COORDS:Chr2_A_fumigatus_Af293:722347-721173C, translated using codon table 1 (355 amino acids) Uncharacterized ORF; Ortholog(s) have mRNA binding activity, role in negative regulation of MAPK cascade and cytosol localization	6.38165	7.32	1	2	2	2	355	37.8871	6.18896
	Afu7g06010	Afu7g06010 AspGDID:ASPL0000110293 COORDS:Chr7_A_fumigatus_Af293:1472458-1471853C, translated using codon table 1 (182 amino acids) Uncharacterized ORF; Ortholog(s) have mitochondrion localization	6.35112	17.58	1	2	2	2	182	19.5816	9.70068
	Afu1g02110	Afu1g02110 AspGDID:ASPL0000101381 COORDS:Chr1_A_fumigatus_Af293:621945-623264W, translated using codon table 1 (376 amino acids) Uncharacterized ORF; 3-deoxy-7-phosphoheptulonate synthase; no human homolog	6.32606	9.04	1	2	2	2	376	40.89	6.85889
	Afu5g10650	Afu5g10650 AspGDID:ASPL0000108129 COORDS:Chr5_A_fumigatus_Af293:2725117-2723747C, translated using codon table 1 (412 amino acids) Uncharacterized ORF; Has domain(s) with predicted FMN binding, oxidoreductase activity, oxidoreductase activity, acting on the CH-NH2 group of donors, pyridoxamine-phosphate oxidase activity	6.16345	7.04	1	2	2	2	412	45.9339	6.25244
	Afu6g12500	Afu6g12500 AspGDID:ASPL0000109594 COORDS:Chr6_A_fumigatus_Af293:3156604-3155495C, translated using codon table 1 (220 amino acids) Uncharacterized ORF; Ortholog(s) have cytosol, mitochondrion, nucleus localization	6.13927	9.09	1	2	2	2	220	23.7052	8.38232
	Afu4g08600	Afu4g08600 AspGDID:ASPL0000106573 COORDS:Chr4_A_fumigatus_Af293:2225523-2227284W, translated using codon table 1 (550 amino acids) Uncharacterized ORF; Putative aldehyde dehydrogenase (NAD(P)+)	6.12079	6.91	1	3	3	3	550	60.0219	6.96143
	Afu2g12180	Afu2g12180 AspGDID:ASPL0000103932 COORDS:Chr2_A_fumigatus_Af293:3139671-3138380C, translated using codon table 1 (327 amino acids) Uncharacterized ORF; Ortholog(s) have Golgi apparatus, endoplasmic reticulum, fungal-type vacuole membrane localization	6.09859	10.7	1	2	2	2	327	36.175	8.60205
	Afu4g08110	Afu4g08110 AspGDID:ASPL0000106525 COORDS:Chr4_A_fumigatus_Af293:2109318-2106680C, translated using codon table 1 (802 amino acids) Uncharacterized ORF; Ortholog(s) have role in mitochondrial translation and mitochondrion localization	6.01418	3.87	1	2	2	2	802	89.1633	6.771
	Afu4g10780	Afu4g10780 AspGDID:ASPL0000106791 COORDS:Chr4_A_fumigatus_Af293:2806494-2819008W, translated using codon table 1 (4039 amino acids) Uncharacterized ORF; Ortholog(s) have role in mRNA export from nucleus and nucleus localization	6.00607	0.72	1	3	3	3	4039	450.543	4.99561
	Afu2g14960	Afu2g14960 AspGDID:ASPL0000104211 COORDS:Chr2_A_fumigatus_Af293:3942076-3942959W, translated using codon table 1 (271 amino acids) Uncharacterized ORF; Ortholog(s) have RNA polymerase II activating transcription factor binding, disulfide oxidoreductase activity	5.96894	7.38	1	2	2	2	271	28.7907	4.90674
	Afu3g06140	Afu3g06140 AspGDID:ASPL0000105025 COORDS:Chr3_A_fumigatus_Af293:1516711-1520611W, translated using codon table 1 (1043 amino acids) Uncharacterized ORF; Ortholog(s) have role in G1 to G0 transition, actin filament organization, activation of bipolar cell growth, cellular protein localization and cellular response to nitrogen starvation, <a href="#GOsection">more</a>	5.8526	2.78	1	2	2	2	1043	118.311	5.59229
	Afu3g06110	Afu3g06110 AspGDID:ASPL0000105022 COORDS:Chr3_A_fumigatus_Af293:1507370-1509490W, translated using codon table 1 (638 amino acids) Uncharacterized ORF; Has domain(s) with predicted enzyme regulator activity, role in regulation of protein catabolic process and proteasome complex localization	5.79613	4.55	1	2	2	2	638	70.7152	7.15186
	Afu5g12890	Afu5g12890 AspGDID:ASPL0000108343 COORDS:Chr5_A_fumigatus_Af293:3381478-3379940C, translated using codon table 1 (512 amino acids) Uncharacterized ORF; Ortholog of <i>A. nidulans FGSC A4</i> : AN6826, <i>A. niger CBS 513.88</i> : An14g06450, <i>A. oryzae RIB40</i> : AO090120000402, <i>Aspergillus wentii</i> : Aspwe1_0058891 and <i>Aspergillus sydowii</i> : Aspsy1_0143996	5.75455	4.1	1	2	2	2	512	59.9216	5.35107
	Afu6g06500	Afu6g06500 AspGDID:ASPL0000109011 COORDS:Chr6_A_fumigatus_Af293:1401790-1403080W, translated using codon table 1 (363 amino acids) Uncharacterized ORF; Actin-related protein 2/3 complex subunit 1A; transcript up-regulated in conidia exposed to neutrophils	5.63217	5.79	1	2	2	2	363	39.959	7.03467
	Afu1g09930	gcy1 AspGDID:ASPL0000102059 COORDS:Chr1_A_fumigatus_Af293:2570399-2571627W, translated using codon table 1 (349 amino acids) Uncharacterized ORF; Putative glycerol dehydrogenase; protein level decreases upon heat shock; transcript up-regulated in conidia exposed to neutrophils	5.526	8.88	1	2	2	2	349	39.1061	8.83643
	Afu6g08810	Afu6g08810 AspGDID:ASPL0000109237 COORDS:Chr6_A_fumigatus_Af293:2088713-2087744C, translated using codon table 1 (285 amino acids) Uncharacterized ORF; Ortholog(s) have role in ascospore formation, mitochondrial respiratory chain complex I assembly, programmed cell death and mitochondrion, plasma membrane localization	5.4522	12.98	1	2	2	2	285	32.5615	8.29443
	Afu1g03490	Afu1g03490 AspGDID:ASPL0000101519 COORDS:Chr1_A_fumigatus_Af293:1008179-1009455W, translated using codon table 1 (373 amino acids) Uncharacterized ORF; Has domain(s) with predicted catalytic activity, coenzyme binding activity and role in cellular metabolic process	5.3441	6.43	1	2	2	2	373	42.1384	6.26514
	Afu4g10020	Afu4g10020 AspGDID:ASPL0000106716 COORDS:Chr4_A_fumigatus_Af293:2596776-2595828C, translated using codon table 1 (242 amino acids) Uncharacterized ORF; Ortholog(s) have Golgi apparatus, cytoplasmic vesicle localization	5.29444	7.02	1	2	2	2	242	26.0718	4.60205
	Afu5g08050	Afu5g08050 AspGDID:ASPL0000107877 COORDS:Chr5_A_fumigatus_Af293:2042382-2039865C, translated using codon table 1 (654 amino acids) Uncharacterized ORF; Putative aminopeptidase P	5.10091	5.35	1	2	2	2	654	72.6344	6.34131
	Afu5g09860	Afu5g09860 AspGDID:ASPL0000108054 COORDS:Chr5_A_fumigatus_Af293:2552613-2551525C, translated using codon table 1 (287 amino acids) Uncharacterized ORF; Putative esterase	5.08044	7.67	1	2	2	2	287	31.5205	6.72705
	Afu1g02670	Afu1g02670 AspGDID:ASPL0000101437 COORDS:Chr1_A_fumigatus_Af293:776882-775673C, translated using codon table 1 (320 amino acids) Uncharacterized ORF; ARP2/3 complex 34 kDa subunit; hypoxia induced protein	5.06774	6.56	1	2	2	2	320	36.915	6.87354
	Afu6g05080	Afu6g05080 AspGDID:ASPL0000108963 COORDS:Chr6_A_fumigatus_Af293:1206219-1207208W, translated using codon table 1 (293 amino acids) Uncharacterized ORF; Ortholog(s) have cytosol, nucleus localization	4.91347	9.56	1	2	2	2	293	32.3697	6.44287
	Afu3g06210	Afu3g06210 AspGDID:ASPL0000105032 COORDS:Chr3_A_fumigatus_Af293:1533290-1534337W, translated using codon table 1 (299 amino acids) Uncharacterized ORF; Putative phosphoribosylaminoimidazole-succinocarboxamidesynthase	4.8285	6.02	1	2	2	2	299	33.2403	5.74463
	Afu6g08300	Afu6g08300 AspGDID:ASPL0000109187 COORDS:Chr6_A_fumigatus_Af293:1940980-1944815W, translated using codon table 1 (1235 amino acids) Uncharacterized ORF; Ortholog(s) have role in regulation of circadian rhythm	4.68987	1.86	1	2	2	2	1235	138.512	8.92432
	Afu5g10120	Afu5g10120 AspGDID:ASPL0000108078 COORDS:Chr5_A_fumigatus_Af293:2603086-2606910W, translated using codon table 1 (1274 amino acids) Uncharacterized ORF; Protein similar to nonribosomal peptide synthases (NRPS-like), encoded in a predicted secondary metabolite gene cluster	4.68575	2.75	1	3	3	3	1274	137.062	6.31592
	Afu6g00660	Afu6g00660 AspGDID:ASPL0000108620 COORDS:Chr6_A_fumigatus_Af293:170160-171220W, translated using codon table 1 (322 amino acids) Uncharacterized ORF; Ortholog(s) have role in asperthecin biosynthetic process	4.66282	6.21	1	2	2	2	322	35.7539	5.51611
	Afu5g11210	Afu5g11210 AspGDID:ASPL0000108181 COORDS:Chr5_A_fumigatus_Af293:2865298-2866520W, translated using codon table 1 (331 amino acids) Uncharacterized ORF; Ortholog(s) have cytoplasm, nucleus localization	3.89026	7.25	1	2	2	2	331	36.565	7.28369
	Afu6g12530	Afu6g12530 AspGDID:ASPL0000109596 COORDS:Chr6_A_fumigatus_Af293:3161896-3164722W, translated using codon table 1 (767 amino acids) Uncharacterized ORF; Ortholog(s) have cytosol localization	3.61999	4.3	1	2	2	2	767	85.6993	4.84326
	Afu6g11620	Afu6g11620 AspGDID:ASPL0000109511 COORDS:Chr6_A_fumigatus_Af293:2883600-2884478W, translated using codon table 1 (292 amino acids) Uncharacterized ORF; Formyltetrahydrofolate deformylase	3.54906	9.25	1	2	2	2	292	32.2338	7.45947
	Afu2g02150	S10a AspGDID:ASPL0000103045 COORDS:Chr2_A_fumigatus_Af293:536724-537226W, translated using codon table 1 (116 amino acids) Uncharacterized ORF; Putative ribosomal protein S10	3.19483	16.38	1	2	2	2	116	13.0562	9.71533
	Afu5g05680	Afu5g05680 AspGDID:ASPL0000107645 COORDS:Chr5_A_fumigatus_Af293:1322763-1324274W, translated using codon table 1 (464 amino acids) Uncharacterized ORF; Ortholog(s) have translation release factor activity, codon specific activity and role in asexual sporulation resulting in formation of a cellular spore, cellular response to nitrogen starvation, cytokinesis, translational termination	2.2636	4.96	1	2	2	2	464	51.8989	6.48096
	Afu2g09180	Afu2g09180 AspGDID:ASPL0000103636 COORDS:Chr2_A_fumigatus_Af293:2354314-2353640C, translated using codon table 1 (201 amino acids) Uncharacterized ORF; Ortholog(s) have role in retrograde vesicle-mediated transport, Golgi to ER and COPI vesicle coat, cytosol, nucleus localization	2.13753	8.46	1	2	2	2	201	21.9153	4.80518
	Afu6g02140	cyp1 AspGDID:ASPL0000108669 COORDS:Chr6_A_fumigatus_Af293:370211-369612C, translated using codon table 1 (161 amino acids) Uncharacterized ORF; Putative cyclophilin; peptidyl-prolyl cis-trans isomerase-like protein	1.72716	13.66	1	2	2	2	161	17.7128	7.04932
	Afu5g08190	Afu5g08190 AspGDID:ASPL0000107891 COORDS:Chr5_A_fumigatus_Af293:2074402-2073089C, translated using codon table 1 (437 amino acids) Uncharacterized ORF; Ortholog of <i>A. nidulans FGSC A4</i> : AN7717, <i>A. oryzae RIB40</i> : AO090701000736, <i>Aspergillus wentii</i> : Aspwe1_0101496, <i>Aspergillus sydowii</i> : Aspsy1_0046260 and <i>Aspergillus terreus NIH2624</i> : ATET_08307	1.69164	5.49	1	2	2	2	437	48.0122	5.49072
	Afu1g05310	Afu1g05310 AspGDID:ASPL0000101699 COORDS:Chr1_A_fumigatus_Af293:1529654-1532946W, translated using codon table 1 (1066 amino acids) Uncharacterized ORF; Ortholog(s) have role in cellular response to nitrogen starvation, negative regulation of G0 to G1 transition, ribosomal small subunit biogenesis and 90S preribosome, nucleolus localization	1.67996	1.59	1	2	2	2	1066	119.041	7.28369
	Afu6g11160	idi1 AspGDID:ASPL0000109466 COORDS:Chr6_A_fumigatus_Af293:2753055-2752098C, translated using codon table 1 (279 amino acids) Uncharacterized ORF; Isopentenyl diphosphate isomerase; SrbA-regulated during hypoxia	1.63792	4.3	1	2	2	2	279	31.5708	5.04639
Afu3g06550	Afu3g10240	Afu3g10240 AspGDID:ASPL0000105422 COORDS:Chr3_A_fumigatus_Af293:2649693-2642482C, translated using codon table 1 (2327 amino acids) Uncharacterized ORF; Ortholog(s) have cytosol, nucleus localization	258.671	33.65	1	56	56	65	2327	258.955	5.94775
Afu7g02260	Afu2g13530	Afu2g13530 AspGDID:ASPL0000104068 COORDS:Chr2_A_fumigatus_Af293:3518148-3521066W, translated using codon table 1 (839 amino acids) Verified ORF; Putative translation elongation factor EF-2 subunit; protein abundant in conidia; protein induced by heat shock	216.252	57.33	1	35	36	50	839	93.1394	6.96143
Afu2g12910	Afu7g01460	Afu7g01460 AspGDID:ASPL0000109941 COORDS:Chr7_A_fumigatus_Af293:380737-379723C, translated using codon table 1 (259 amino acids) Uncharacterized ORF; Ribosomal protein S5	201.001	56.37	1	13	13	51	259	28.2875	10.5356
Afu3g13870	Afu1g06390	tef1 AspGDID:ASPL0000101807 COORDS:Chr1_A_fumigatus_Af293:1831593-1833461W, translated using codon table 1 (494 amino acids) Verified ORF; Putative translation elongation factor EF-1 alpha subunit; protein abundant in conidia; protein induced by heat shock	192.936	59.92	1	18	18	40	494	53.8089	9.1001
Afu7g01860	Afu6g11890	Afu6g11890 AspGDID:ASPL0000109535 COORDS:Chr6_A_fumigatus_Af293:2972392-2969433C, translated using codon table 1 (930 amino acids) Uncharacterized ORF; Putative dynamin GTPase	186.003	46.77	1	30	30	42	930	104.337	6.82959
Afu1g09010	Afu5g04170	hsp90 AspGDID:ASPL0000107596 COORDS:Chr5_A_fumigatus_Af293:1108402-1110583W, translated using codon table 1 (706 amino acids) Verified ORF; Heat shock protein; allergen Asp f 12; likely essential; required for conidiation and cell wall integrity; transcript induced by growth on hydrogen peroxide; enters the nucleus in response to heat shock	167.596	45.47	1	34	34	42	706	80.5903	5.0083
Afu3g10660	Afu4g03410	fhpA AspGDID:ASPL0000106160 COORDS:Chr4_A_fumigatus_Af293:972646-973887W, translated using codon table 1 (413 amino acids) Uncharacterized ORF; Putative flavohemoprotein; protein induced by heat shock and hypoxia	163.215	69.73	1	21	21	33	413	45.5801	6.13818
Afu1g15450	Afu3g04220	Afu3g04220 AspGDID:ASPL0000104938 COORDS:Chr3_A_fumigatus_Af293:1190959-1197288W, translated using codon table 1 (2092 amino acids) Uncharacterized ORF; Putative fatty acid synthase beta subunit; calcium downregulated; repressed by exposure to artemisinin; no human homolog	162.996	24	1	32	32	37	2092	231.898	6.27783
Afu6g04010	Afu2g08040	Afu2g08040 AspGDID:ASPL0000103524 COORDS:Chr2_A_fumigatus_Af293:2064984-2068747W, translated using codon table 1 (1148 amino acids) Uncharacterized ORF; C6 finger domain protein; transcript up-regulated in conidia exposed to neutrophils	161.908	29.36	1	26	26	39	1148	125.856	8.1626
Afu7g00250	Afu6g04600	Afu6g04600 AspGDID:ASPL0000108914 COORDS:Chr6_A_fumigatus_Af293:1069099-1067587C, translated using codon table 1 (477 amino acids) Uncharacterized ORF; Ortholog of <i>A. nidulans FGSC A4</i> : AN6560, <i>A. niger CBS 513.88</i> : An15g00728, <i>A. oryzae RIB40</i> : AO090701000086, <i>Aspergillus wentii</i> : Aspwe1_0324754 and <i>Aspergillus sydowii</i> : Aspsy1_0037161	150.141	50.94	1	19	19	31	477	50.7436	10.228
Afu3g12100	Afu6g10650	Afu6g10650 AspGDID:ASPL0000109420 COORDS:Chr6_A_fumigatus_Af293:2633292-2631089C, translated using codon table 1 (657 amino acids) Uncharacterized ORF; Putative ATP citrate lyase, subunit 1; protein induced by heat shock	144.6	52.82	1	24	24	37	657	71.9031	8.48486
Afu6g08750	Afu1g07440	hsp70 AspGDID:ASPL0000101909 COORDS:Chr1_A_fumigatus_Af293:2102587-2104621W, translated using codon table 1 (638 amino acids) Verified ORF; Molecular chaperone; conidia-enriched protein	142.293	52.98	1	25	26	32	638	69.6176	5.17334
Afu2g15940	Afu2g08670	Afu2g08670 AspGDID:ASPL0000103586 COORDS:Chr2_A_fumigatus_Af293:2234495-2227401C, translated using codon table 1 (2292 amino acids) Uncharacterized ORF; Ortholog(s) have acetyl-CoA carboxylase activity, biotin carboxylase activity and role in long-chain fatty acid biosynthetic process, protein import into nucleus, regulation of mitosis	138.41	20.55	1	32	32	34	2292	254.784	6.3667
Afu6g03460	Afu5g10550	Afu5g10550 AspGDID:ASPL0000108119 COORDS:Chr5_A_fumigatus_Af293:2702208-2700129C, translated using codon table 1 (519 amino acids) Uncharacterized ORF; ATP synthase F1, beta subunit; reacts with rabbit immunosera exposed to A. fumigatus conidia; hypoxia induced protein	129.828	67.82	1	22	23	31	519	55.586	5.43994
Afu7g03980	Afu3g04210	Afu3g04210 AspGDID:ASPL0000104937 COORDS:Chr3_A_fumigatus_Af293:1188450-1182737C, translated using codon table 1 (1857 amino acids) Uncharacterized ORF; Fatty acid synthase alpha subunit; transcript induced by exposure to human airway epithelial cells; no human homolog	123.368	21.27	1	29	29	32	1857	204.472	6.48096
Afu2g01040	Afu4g07360	metH AspGDID:ASPL0000106450 COORDS:Chr4_A_fumigatus_Af293:1914045-1911526C, translated using codon table 1 (774 amino acids) Uncharacterized ORF; Putative cobalamin-independent methionine synthase; protein induced by heat shock; Yap1-dependent induction in response to hydrogen peroxide; reacts with rabbit immunosera exposed to A. fumigatus conidia; no human homolog	121.685	43.93	1	25	25	31	774	86.8405	6.78564
Afu1g13710	Afu7g05660	Afu7g05660 AspGDID:ASPL0000110259 COORDS:Chr7_A_fumigatus_Af293:1376127-1379437W, translated using codon table 1 (1065 amino acids) Uncharacterized ORF; Putative translation elongation factor eEF-3; protein induced by heat shock and hypoxia	121	34.55	1	22	22	28	1065	117.694	6.17627
Afu2g01920	Afu6g06770	aspf22 AspGDID:ASPL0000109039 COORDS:Chr6_A_fumigatus_Af293:1480347-1478847C, translated using codon table 1 (438 amino acids) Verified ORF; Putative enolase; allergen Asp f 22; conidia-enriched protein; transcript induced by growth on hydrogen peroxide; hypoxia induced protein; transcript induced by exposure to human airway epithelial cells	118.253	64.61	1	18	18	25	438	47.2763	5.57959
Afu4g03630	Afu8g05570	Afu8g05570 AspGDID:ASPL0000110886 COORDS:Chr8_A_fumigatus_Af293:1302301-1307445W, translated using codon table 1 (1497 amino acids) Uncharacterized ORF; Ortholog(s) have DNA binding, sequence-specific DNA binding transcription factor activity, transcription coactivator activity, transcription corepressor activity	117.132	28.32	1	31	31	34	1497	169.361	6.99072
Afu5g07120	Afu1g10350	pgkA AspGDID:ASPL0000102099 COORDS:Chr1_A_fumigatus_Af293:2666254-2667669W, translated using codon table 1 (417 amino acids) Verified ORF; Putative phosphoglycerate kinase; reacts with rabbit immunosera exposed to conidia; hypoxia induced protein; transcript up-regulated in conidia exposed to neutrophils; induced by gliotoxin exposure	115.168	64.75	1	24	24	30	417	44.7338	6.7417
Afu2g04680	Afu3g13400	nop5 AspGDID:ASPL0000105735 COORDS:Chr3_A_fumigatus_Af293:3545829-3547784W, translated using codon table 1 (591 amino acids) Uncharacterized ORF; Putative nucleolar protein	115.012	40.78	1	20	20	26	591	64.5228	7.60596
Afu2g09850	Afu3g11070	pdcA AspGDID:ASPL0000105505 COORDS:Chr3_A_fumigatus_Af293:2890318-2892286W, translated using codon table 1 (569 amino acids) Verified ORF; Putative pyruvate decarboxylase with a predicted role in pyruvate metabolism; reacts with rabbit immunosera exposed to A. fumigatus conidia; higher expression in 48 h biofilm vs planktonic cells; protein increases during hypoxia	114.593	51.14	1	18	18	24	569	62.9591	6.53662
Afu7g04070	Afu8g03930	hscA AspGDID:ASPL0000110728 COORDS:Chr8_A_fumigatus_Af293:839316-841607W, translated using codon table 1 (614 amino acids) Verified ORF; Putative Hsp70 chaperone; Yap1-dependent induction in response to hydrogen peroxide; hypoxia induced protein	113.226	50.33	1	20	20	25	614	66.9316	5.38916
Afu4g11240	Afu5g12250	Afu5g12250 AspGDID:ASPL0000108281 COORDS:Chr5_A_fumigatus_Af293:3179873-3182548W, translated using codon table 1 (731 amino acids) Uncharacterized ORF; Ortholog(s) have role in cellular response to DNA damage stimulus, interspecies interaction between organisms and cytosol, nucleus, polysome localization	112.5	43.91	1	27	27	31	731	82.9925	6.22705
Afu5g11560	Afu4g12750	Afu4g12750 AspGDID:ASPL0000106981 COORDS:Chr4_A_fumigatus_Af293:3344997-3342675C, translated using codon table 1 (750 amino acids) Uncharacterized ORF; Ortholog(s) have role in deadenylation-dependent decapping of nuclear-transcribed mRNA and cytosol, nucleus localization	112.499	36.67	1	23	23	28	750	84.8371	6.99072
Afu1g05610	Afu2g09290	hsp60 AspGDID:ASPL0000103647 COORDS:Chr2_A_fumigatus_Af293:2378663-2376729C, translated using codon table 1 (587 amino acids) Verified ORF; Putative antigenic mitochondrial protein; reacts with rabbit immunosera exposed to A. fumigatus conidia; hypoxia induced protein	112.344	54	1	24	24	27	587	61.9117	5.64307
Afu1g06790	Afu1g09630	Afu1g09630 AspGDID:ASPL0000102029 COORDS:Chr1_A_fumigatus_Af293:2492509-2488889C, translated using codon table 1 (1056 amino acids) Uncharacterized ORF; Ortholog of <i>A. nidulans FGSC A4</i> : AN1325, <i>A. niger CBS 513.88</i> : An08g01230, <i>A. oryzae RIB40</i> : AO090012000905, <i>Aspergillus wentii</i> : Aspwe1_0036403 and <i>Aspergillus sydowii</i> : Aspsy1_0053047	107.706	30.02	1	18	18	27	1056	114.406	9.53955
Afu6g07540	Afu3g10450	Afu3g10450 AspGDID:ASPL0000105443 COORDS:Chr3_A_fumigatus_Af293:2706092-2708542W, translated using codon table 1 (816 amino acids) Uncharacterized ORF; Has domain(s) with predicted RNA binding activity and role in RNA processing	107.089	40.81	1	23	23	29	816	88.462	5.79541
Afu5g00720	Afu3g09600	sik1 AspGDID:ASPL0000105358 COORDS:Chr3_A_fumigatus_Af293:2440680-2442368W, translated using codon table 1 (522 amino acids) Uncharacterized ORF; Ortholog(s) have role in rRNA processing and 90S preribosome, box C/D snoRNP complex, small-subunit processome localization	105.777	42.34	1	14	14	23	522	58.1594	9.01221
Afu3g08980	Afu2g09960	ssc70 AspGDID:ASPL0000103712 COORDS:Chr2_A_fumigatus_Af293:2553995-2551772C, translated using codon table 1 (661 amino acids) Verified ORF; Putative mitochondrial Hsp70 chaperone; reacts with rabbit immunosera exposed to A. fumigatus conidia; hypoxia induced protein	105.285	44.93	1	21	21	26	661	71.9316	6.16357
Afu6g07940	Afu3g07480	Afu3g07480 AspGDID:ASPL0000105155 COORDS:Chr3_A_fumigatus_Af293:1875540-1878141W, translated using codon table 1 (722 amino acids) Uncharacterized ORF; Ortholog(s) have nucleus localization	104.335	40.58	1	22	22	27	722	80.9236	9.81787
Afu1g12250	Afu4g06620	Afu4g06620 AspGDID:ASPL0000106377 COORDS:Chr4_A_fumigatus_Af293:1712343-1713780W, translated using codon table 1 (458 amino acids) Uncharacterized ORF; Glutamate/Leucine/Phenylalanine/Valine dehydrogenase; reacts with rabbit immunosera exposed to A. fumigatus conidia; hypoxia induced protein	101.319	68.34	1	20	20	23	458	49.3369	6.1001
Afu2g11475	Afu4g07660	ded1 AspGDID:ASPL0000106481 COORDS:Chr4_A_fumigatus_Af293:1990592-1992696W, translated using codon table 1 (674 amino acids) Uncharacterized ORF; ATP-dependent RNA helicase	99.8749	49.55	1	23	24	27	674	72.0459	8.95361
Afu3g01580	Afu6g12930	acoA AspGDID:ASPL0000109636 COORDS:Chr6_A_fumigatus_Af293:3262693-3265559W, translated using codon table 1 (787 amino acids) Verified ORF; Mitochondrial aconitate hydratase; citric acid cycle enzyme; protein abundant in conidia; transcript induced in conidia exposed to neutrophils; reacts with rabbit immunosera exposed to A. fumigatus conidia; hypoxia induced	99.4569	44.09	1	26	26	26	787	85.4752	6.7124
Afu6g13330	Afu4g13170	cpcB AspGDID:ASPL0000107023 COORDS:Chr4_A_fumigatus_Af293:3449811-3448364C, translated using codon table 1 (316 amino acids) Verified ORF; G-protein complex beta subunit; conidia-enriched protein; immunoreactive	96.4089	63.61	1	13	13	19	316	34.9574	6.52197
Afu5g08270	Afu5g03120	Afu5g03120 AspGDID:ASPL0000107491 COORDS:Chr5_A_fumigatus_Af293:846908-842554C, translated using codon table 1 (1418 amino acids) Uncharacterized ORF; Ortholog(s) have 5'-3' exoribonuclease activity, magnesium ion binding activity and cytoplasmic mRNA processing body, cytoplasmic stress granule, cytosol localization	96.1867	24.26	1	23	23	24	1418	159.853	7.06396
Afu4g12870	Afu4g12450	Afu4g12450 AspGDID:ASPL0000106952 COORDS:Chr4_A_fumigatus_Af293:3270803-3272689W, translated using codon table 1 (541 amino acids) Uncharacterized ORF; Putative PH domain protein; conserved lysine-rich protein; Yap1-dependent induction in response to hydrogen peroxide; hypoxia repressed protein	96.0014	55.27	1	17	17	20	541	56.9689	5.03369
Afu3g06530	Afu2g17110	cdc48 AspGDID:ASPL0000104427 COORDS:Chr2_A_fumigatus_Af293:4568058-4570820W, translated using codon table 1 (819 amino acids) Uncharacterized ORF; Putative cell division control protein; protein induced by heat shock	93.6523	35.53	1	21	21	25	819	90.162	5.22412
Afu2g10660	Afu4g11830	Afu4g11830 AspGDID:ASPL0000106891 COORDS:Chr4_A_fumigatus_Af293:3122796-3124999W, translated using codon table 1 (713 amino acids) Uncharacterized ORF; Ortholog(s) have U2-type spliceosomal complex localization	93.2208	36.33	1	17	17	22	713	83.3627	7.12256
Afu1g15000	Afu6g07770	Afu6g07770 AspGDID:ASPL0000109137 COORDS:Chr6_A_fumigatus_Af293:1773673-1775224W, translated using codon table 1 (501 amino acids) Uncharacterized ORF; Putative alanine aminotransferase	92.4599	42.32	1	14	14	22	501	55.1004	5.96045
Afu5g02370	Afu2g11850	rpL3 AspGDID:ASPL0000103899 COORDS:Chr2_A_fumigatus_Af293:3060721-3062260W, translated using codon table 1 (392 amino acids) Uncharacterized ORF; Allergenic ribosomal L3 protein; allergen Asp f 23; transcript induced in response to dibutyryl cyclic AMP	91.6315	45.15	1	18	19	23	392	44.4167	10.1841
Afu3g10310	Afu1g10630	Afu1g10630 AspGDID:ASPL0000102127 COORDS:Chr1_A_fumigatus_Af293:2776408-2774958C, translated using codon table 1 (387 amino acids) Uncharacterized ORF; Putative S-adenosylmethionine synthetase; higher expression in 48 h biofilm vs planktonic cells; hypoxia induced protein	91.1047	66.67	1	16	16	20	387	42.1698	6.01123
Afu3g09910	Afu5g05450	rps1 AspGDID:ASPL0000107624 COORDS:Chr5_A_fumigatus_Af293:1266407-1265371C, translated using codon table 1 (256 amino acids) Uncharacterized ORF; 40S ribosomal protein S3Ae; 40S ribosomal protein S1; reacts with rabbit immunosera exposed to A. fumigatus conidia	90.8298	52.34	1	14	14	21	256	29.1829	10.0376
Afu3g09030	Afu3g11830	pgmA AspGDID:ASPL0000105579 COORDS:Chr3_A_fumigatus_Af293:3113884-3115685W, translated using codon table 1 (555 amino acids) Uncharacterized ORF; Putative phosphoglucomutase; reacts with rabbit immunosera exposed to A. fumigatus conidia; hypoxia repressed protein; transcript up-regulated in conidia exposed to neutrophils	89.9262	48.47	1	20	20	23	555	60.4637	6.75635
Afu3g12530	Afu6g04570	Afu6g04570 AspGDID:ASPL0000108911 COORDS:Chr6_A_fumigatus_Af293:1060589-1062452W, translated using codon table 1 (482 amino acids) Uncharacterized ORF; Putative translational elongation factor eEF-1 gamma subunit; protein induced by heat shock; transcript induced by exposure to human airway epithelial cells; snoRNA Afu-328 encoded within intron 2	88.1421	48.55	1	18	18	23	482	54.1488	7.63525
Afu3g09700	Afu4g11650	kgd1 AspGDID:ASPL0000106873 COORDS:Chr4_A_fumigatus_Af293:3079845-3083210W, translated using codon table 1 (1057 amino acids) Uncharacterized ORF; Putative alpha-ketoglutarate dehydrogenase complex subunit; protein induced by heat shock	87.7962	28.38	1	20	20	22	1057	118.826	6.94678
Afu5g10570	Afu5g05710	Afu5g05710 AspGDID:ASPL0000107648 COORDS:Chr5_A_fumigatus_Af293:1330422-1332169W, translated using codon table 1 (487 amino acids) Uncharacterized ORF; Ortholog(s) have pseudouridine synthase activity	87.7552	40.66	1	16	16	21	487	54.6913	8.5874
Afu3g11390	Afu1g14220	nopA AspGDID:ASPL0000102490 COORDS:Chr1_A_fumigatus_Af293:3799657-3798472C, translated using codon table 1 (312 amino acids) Verified ORF; Nucleolar protein	87.7241	60.26	1	15	15	20	312	32.5521	10.2866
Afu8g05440	Afu3g07640	pma1 AspGDID:ASPL0000105170 COORDS:Chr3_A_fumigatus_Af293:1930419-1933527W, translated using codon table 1 (988 amino acids) Verified ORF; Putative plasma membrane H+ ATPase; transcript upregulated during conidial germination and in response to amphotericin B; protein and transcript levels downregulated by caspofungin treatment	85.9042	24.7	1	17	17	22	988	108.923	5.36377
Afu5g07300	Afu8g05320	Afu8g05320 AspGDID:ASPL0000110862 COORDS:Chr8_A_fumigatus_Af293:1239645-1241741W, translated using codon table 1 (556 amino acids) Verified ORF; Putative mitochondrial F1 ATPase subunit alpha; hypoxia induced protein	85.2723	44.24	1	20	20	24	556	59.8954	9.0708
Afu5g11240	Afu6g09920	Afu6g09920 AspGDID:ASPL0000109348 COORDS:Chr6_A_fumigatus_Af293:2439681-2441534W, translated using codon table 1 (617 amino acids) Uncharacterized ORF; Ortholog of <i>A. nidulans FGSC A4</i> : AN10946, <i>A. niger CBS 513.88</i> : An11g07970, <i>A. oryzae RIB40</i> : AO090001000626, <i>Neosartorya fischeri NRRL 181</i> : NFIA_055650 and <i>Aspergillus wentii</i> : Aspwe1_0045804	84.8864	39.71	1	16	16	21	617	65.3072	9.56885
Afu4g06900	Afu3g08160	tif1 AspGDID:ASPL0000105219 COORDS:Chr3_A_fumigatus_Af293:2095759-2094223C, translated using codon table 1 (406 amino acids) Verified ORF; Eukaryotic translation initiation factor eIF4A; ATP-dependent RNA helicase; protein induced by heat shock; predicted gene pair with AFUA_5G02410	83.524	49.51	1	16	16	20	406	45.7494	5.18604
Afu6g10470	Afu6g10660	Afu6g10660 AspGDID:ASPL0000109421 COORDS:Chr6_A_fumigatus_Af293:2635628-2637150W, translated using codon table 1 (486 amino acids) Uncharacterized ORF; Putative ATP citrate lyase subunit; repressed by gliotoxin exposure22405895	82.1506	42.39	1	15	15	21	486	52.8847	6.26514
Afu1g10810	Afu6g04740	act1 AspGDID:ASPL0000108928 COORDS:Chr6_A_fumigatus_Af293:1114434-1113100C, translated using codon table 1 (393 amino acids) Verified ORF; Actin	81.6625	56.74	1	14	14	18	393	43.8651	6.27783
Afu1g09330	Afu1g12890	Afu1g12890 AspGDID:ASPL0000102357 COORDS:Chr1_A_fumigatus_Af293:3406505-3407674W, translated using codon table 1 (300 amino acids) Uncharacterized ORF; Putative 60S Ribosomal protein L5	80.7885	52	1	11	11	16	300	34.7819	8.93896
Afu3g13820	Afu1g10130	Afu1g10130 AspGDID:ASPL0000102077 COORDS:Chr1_A_fumigatus_Af293:2611841-2610281C, translated using codon table 1 (446 amino acids) Uncharacterized ORF; Putative adenosylhomocysteinase; protein induced by heat shock	79.8895	37.67	1	13	13	19	446	48.4589	6.21436
Afu2g06000	Afu6g08050	gnd1 AspGDID:ASPL0000109165 COORDS:Chr6_A_fumigatus_Af293:1868427-1870349W, translated using codon table 1 (491 amino acids) Verified ORF; 6-phosphogluconate dehydrogenase; conidia-enriched protein; protein induced by heat shock; reacts with rabbit immunosera exposed to conidia; hypoxia-induced protein; transcript induced by exposure to human airway epithelial cells	79.6488	53.16	1	18	18	22	491	54.1233	5.93506
Afu3g11170	Afu1g12170	Afu1g12170 AspGDID:ASPL0000102283 COORDS:Chr1_A_fumigatus_Af293:3214725-3216299W, translated using codon table 1 (440 amino acids) Uncharacterized ORF; Putative translation elongation factor EF-Tu; hypoxia induced protein	79.1074	47.27	1	14	14	18	440	48.2559	7.18115
Afu5g02750	Afu1g03010	Afu1g03010 AspGDID:ASPL0000101471 COORDS:Chr1_A_fumigatus_Af293:869019-866374C, translated using codon table 1 (881 amino acids) Uncharacterized ORF; Ortholog(s) have U2-type spliceosomal complex localization	77.1092	23.16	1	15	15	19	881	100.781	9.94971
Afu1g04950	Afu1g12610	hsp88 AspGDID:ASPL0000102329 COORDS:Chr1_A_fumigatus_Af293:3331407-3333764W, translated using codon table 1 (714 amino acids) Uncharacterized ORF; Hsp70 chaperone; conidia-enriched protein; induction in response to hydrogen peroxide Yap1-dependent	76.9002	34.31	1	18	18	19	714	79.9949	5.17334
Afu1g14850	Afu1g13500	tktA AspGDID:ASPL0000102418 COORDS:Chr1_A_fumigatus_Af293:3591128-3588583C, translated using codon table 1 (684 amino acids) Verified ORF; Putative transketolase; protein abundant in conidia; protein induced by heat shock and by hydrogen peroxide; reacts with rabbit immunosera exposed to A. fumigatus conidia	76.5734	35.96	1	21	21	23	684	74.7807	6.59521
Afu1g02150	Afu4g07710	Afu4g07710 AspGDID:ASPL0000106486 COORDS:Chr4_A_fumigatus_Af293:2014380-2018024W, translated using codon table 1 (1193 amino acids) Uncharacterized ORF; Putative pyruvate carboxylase; protein induced by heat shock	76.1338	21.88	1	17	17	18	1193	131.191	6.69775
Afu1g08790	Afu1g11190	Afu1g11190 AspGDID:ASPL0000102182 COORDS:Chr1_A_fumigatus_Af293:2947142-2948249W, translated using codon table 1 (227 amino acids) Verified ORF; Putative eukaryotic translation elongation factor 1 subunit eEF1-beta; reacts with rabbit immunosera exposed to A. fumigatus conidia; induced by gliotoxin exposure	75.7007	67.4	1	12	12	17	227	25.2295	4.55127
Afu3g11640	Afu1g02550	Afu1g02550 AspGDID:ASPL0000101425 COORDS:Chr1_A_fumigatus_Af293:746335-744583C, translated using codon table 1 (448 amino acids) Uncharacterized ORF; Tubulin alpha-1 subunit; gene pair with AFUA_2G14990 (tubulin alpha-2 subunit)	74.5725	44.2	1	13	14	17	448	49.9932	5.09717
Afu5g12570	Afu1g10910	tubA AspGDID:ASPL0000102154 COORDS:Chr1_A_fumigatus_Af293:2850137-2848155C, translated using codon table 1 (466 amino acids) Uncharacterized ORF; Beta-tubulin; predicted gene pair with AFUA_7G00250 (tubulin beta-2 subunit); protein induced by hydrogen peroxide	74.2928	51.5	1	11	12	15	466	51.7606	4.86865
Afu5g12260	Afu5g09230	Afu5g09230 AspGDID:ASPL0000107992 COORDS:Chr5_A_fumigatus_Af293:2377061-2378400W, translated using codon table 1 (324 amino acids) Verified ORF; Putative transaldolase; abundant protein in conidia and mycelia; protein induced by hydrogen peroxide and hypoxia	74.1093	59.57	1	16	16	18	324	35.4265	6.44287
Afu1g10970	Afu2g09650	Afu2g09650 AspGDID:ASPL0000103682 COORDS:Chr2_A_fumigatus_Af293:2480020-2481781W, translated using codon table 1 (469 amino acids) Uncharacterized ORF; Aspartate transaminase; induced by L-tyrosine; transcript up-regulated in conidia exposed to neutrophils	73.6387	52.45	1	16	16	19	469	51.1509	8.48486
Afu5g10640	Afu1g15270	Afu1g15270 AspGDID:ASPL0000102593 COORDS:Chr1_A_fumigatus_Af293:4111044-4114037W, translated using codon table 1 (997 amino acids) Uncharacterized ORF; Ortholog(s) have cytosol, nuclear envelope localization	73.4643	23.87	1	18	18	18	997	111.028	5.70654
Afu5g10560	Afu6g04920	fdh AspGDID:ASPL0000108946 COORDS:Chr6_A_fumigatus_Af293:1161764-1163212W, translated using codon table 1 (418 amino acids) Verified ORF; Putative NAD-dependent formate dehydrogenase; protein more abundant in conidia than mycelia; transcript up-regulated in conidia exposed to neutrophils; protein induced by heat shock; SrbA-regulated during hypoxia	72.0557	43.54	1	13	13	16	418	45.7177	8.26514
Afu7g01840	Afu6g06340	gfa1 AspGDID:ASPL0000108994 COORDS:Chr6_A_fumigatus_Af293:1344619-1347035W, translated using codon table 1 (694 amino acids) Uncharacterized ORF; Ortholog(s) have glutamine-fructose-6-phosphate transaminase (isomerizing) activity	71.5813	36.46	1	15	15	16	694	77.2379	6.69775
Afu2g03490	Afu2g10090	Afu2g10090 AspGDID:ASPL0000103724 COORDS:Chr2_A_fumigatus_Af293:2584422-2583412C, translated using codon table 1 (153 amino acids) Uncharacterized ORF; 40S ribosomal protein S15	70.7391	58.82	1	6	6	14	153	17.7036	10.0669
Afu7g05370	Afu4g03160	Afu4g03160 AspGDID:ASPL0000106134 COORDS:Chr4_A_fumigatus_Af293:886361-887395W, translated using codon table 1 (344 amino acids) Uncharacterized ORF; Ortholog(s) have U2-type spliceosomal complex, cytosol localization	70.1417	44.48	1	10	10	15	344	37.7829	5.8208
Afu2g15760	Afu6g05210	Afu6g05210 AspGDID:ASPL0000108976 COORDS:Chr6_A_fumigatus_Af293:1250905-1252499W, translated using codon table 1 (330 amino acids) Verified ORF; Putative NAD-dependent malate dehydrogenase with a predicted role in the citric acid cycle; transcript up-regulated in conidia exposed to neutrophils; phoB-regulated; reacts with rabbit immunosera exposed to A. fumigatus conidia	69.3811	58.79	1	14	14	16	330	34.7885	7.23975
Afu5g03690	Afu1g04190	pab1 AspGDID:ASPL0000101587 COORDS:Chr1_A_fumigatus_Af293:1197903-1195508C, translated using codon table 1 (753 amino acids) Uncharacterized ORF; Putative polyadenylate-binding protein	68.5398	27.76	1	19	19	21	753	81.3943	5.94775
Afu3g14540	Afu2g15550	Afu2g15550 AspGDID:ASPL0000104272 COORDS:Chr2_A_fumigatus_Af293:4104096-4101795C, translated using codon table 1 (712 amino acids) Uncharacterized ORF; Ortholog(s) have nitrate reductase (NADPH) activity and role in Mo-molybdopterin cofactor biosynthetic process	68.2308	39.89	1	16	16	18	712	74.4887	7.29834
Afu1g15960	Afu5g03020	Afu5g03020 AspGDID:ASPL0000107481 COORDS:Chr5_A_fumigatus_Af293:806662-808051W, translated using codon table 1 (373 amino acids) Uncharacterized ORF; 60S ribosomal protein L4	68.1506	37	1	11	11	17	373	40.479	10.9604
Afu3g08940	Afu5g06240	alcC AspGDID:ASPL0000107700 COORDS:Chr5_A_fumigatus_Af293:1495619-1494455C, translated using codon table 1 (350 amino acids) Verified ORF; Putative zinc-dependent alcohol dehydrogenase, involved in ethanol fermentation; predicted gene pair with adh1; protein induced by hydrogen peroxide; reacts with rabbit immunosera exposed to A. fumigatus conidia	67.1421	48.86	1	14	15	18	350	37.1563	7.63525
Afu8g07130	Afu6g11310	Afu6g11310 AspGDID:ASPL0000109481 COORDS:Chr6_A_fumigatus_Af293:2801160-2808052W, translated using codon table 1 (2256 amino acids) Uncharacterized ORF; Ortholog(s) have GMP synthase (glutamine-hydrolyzing) activity, aspartate carbamoyltransferase activity, carbamoyl-phosphate synthase (glutamine-hydrolyzing) activity, dihydroorotase activity	66.9295	11.92	1	19	21	22	2256	248.298	6.58057
Afu6g06345	Afu4g06840	Afu4g06840 AspGDID:ASPL0000106398 COORDS:Chr4_A_fumigatus_Af293:1768008-1766126C, translated using codon table 1 (537 amino acids) Uncharacterized ORF; Has domain(s) with predicted nucleic acid binding, nucleotide binding activity	66.7532	35.75	1	13	13	17	537	58.2254	5.87158
Afu2g14060	Afu3g06840	Afu3g06840 AspGDID:ASPL0000105095 COORDS:Chr3_A_fumigatus_Af293:1702997-1704159W, translated using codon table 1 (261 amino acids) Uncharacterized ORF; Putative cytosolic small ribosomal subunit S4	66.6281	43.68	1	12	12	18	261	29.4728	10.0669
Afu3g10360	Afu7g01830	ugp1 AspGDID:ASPL0000109978 COORDS:Chr7_A_fumigatus_Af293:488718-487183C, translated using codon table 1 (511 amino acids) Verified ORF; UTP-glucose-1-phosphate uridylyltransferase; induced by hydrogen peroxide; hypoxia repressed protein	66.573	42.86	1	15	15	16	511	56.8895	6.87354
Afu4g11250	Afu6g06750	Afu6g06750 AspGDID:ASPL0000109037 COORDS:Chr6_A_fumigatus_Af293:1474803-1476209W, translated using codon table 1 (272 amino acids) Uncharacterized ORF; 14-3-3 family protein; predicted gene pair with AFUA_2G03290 (artA)	66.4068	51.1	1	10	11	15	272	30.6832	4.91943
Afu3g13480	Afu1g06780	Afu1g06780 AspGDID:ASPL0000101846 COORDS:Chr1_A_fumigatus_Af293:1934366-1936614W, translated using codon table 1 (661 amino acids) Uncharacterized ORF; Ortholog(s) have cytosol, nucleus localization	66.227	30.11	1	10	10	13	661	71.7523	6.44287
Afu8g04810	Afu3g09320	Afu3g09320 AspGDID:ASPL0000105330 COORDS:Chr3_A_fumigatus_Af293:2359631-2361249W, translated using codon table 1 (471 amino acids) Uncharacterized ORF; Serine hydroxymethyltransferase; protein level decreases upon heat shock; reacts with rabbit immunosera exposed to A. fumigatus conidia; hypoxia induced protein; SrbA-regulated during hypoxia	65.2691	48.83	1	15	16	18	471	51.8405	7.75244
Afu7g02230	Afu2g17000	Afu2g17000 AspGDID:ASPL0000104419 COORDS:Chr2_A_fumigatus_Af293:4544466-4551049W, translated using codon table 1 (2173 amino acids) Uncharacterized ORF; Ortholog of <i>A. nidulans FGSC A4</i> : AN5649, AN1674, AN0384, AN1268, AN7262, <i>A. fumigatus Af293</i> : Afu1g01700, Afu4g08730, Afu4g13630, Afu1g10012 and <i>A. niger CBS 513.88</i> : An01g09380, An01g06520, An04g09080, An04g03600	64.9634	14.27	1	18	18	22	2173	224.251	3.99268
Afu5g11380	Afu1g05630	Afu1g05630 AspGDID:ASPL0000101731 COORDS:Chr1_A_fumigatus_Af293:1617319-1616207C, translated using codon table 1 (266 amino acids) Uncharacterized ORF; 40S ribosomal protein S3	64.3297	69.92	1	16	16	19	266	29.1832	9.1001
Afu3g10630	Afu5g13450	Afu5g13450 AspGDID:ASPL0000108398 COORDS:Chr5_A_fumigatus_Af293:3535793-3536876W, translated using codon table 1 (249 amino acids) Verified ORF; Putative triosephosphate isomerase; protein abundant in conidia; reacts with rabbit immunosera exposed to A. fumigatus conidia' transcript induced by exposure to human airway epithelial cells	64.3208	63.05	1	10	10	14	249	27.1124	5.79541
Afu4g07910	Afu4g07700	Afu4g07700 AspGDID:ASPL0000106485 COORDS:Chr4_A_fumigatus_Af293:2006286-2011744W, translated using codon table 1 (1679 amino acids) Uncharacterized ORF; Clathrin, heavy chain; transcript downregulated in response to amphotericin B	63.5286	16.38	1	18	18	18	1679	191.183	5.33838
Afu5g05500	Afu5g04330	Afu5g04330 AspGDID:ASPL0000107612 COORDS:Chr5_A_fumigatus_Af293:1164058-1160457C, translated using codon table 1 (967 amino acids) Verified ORF; Putative aminopeptidase; conidia-enriched protein; protein induced by heat shock; repressed by gliotoxin exposure	63.3924	22.03	1	15	15	17	967	108.639	6.7124
Afu5g02360	Afu3g08380	ipp1 AspGDID:ASPL0000105241 COORDS:Chr3_A_fumigatus_Af293:2149763-2148296C, translated using codon table 1 (396 amino acids) Uncharacterized ORF; Putative inorganic diphosphatase; reacts with rabbit immunosera exposed to A. fumigatus conidia	62.8572	40.15	1	15	15	19	396	43.5964	7.76709
Afu4g05830	Afu3g08520	Afu3g08520 AspGDID:ASPL0000105254 COORDS:Chr3_A_fumigatus_Af293:2185740-2187668W, translated using codon table 1 (600 amino acids) Uncharacterized ORF; Ortholog(s) have role in cell wall organization or biogenesis, cellular response to stress, regulation of transcription, DNA-templated	62.3043	29.33	1	14	14	19	600	64.3392	9.0708
Afu2g01750	Afu4g10410	Afu4g10410 AspGDID:ASPL0000106755 COORDS:Chr4_A_fumigatus_Af293:2732043-2730416C, translated using codon table 1 (429 amino acids) Uncharacterized ORF; Putative aspartate aminotransferase; reacts with rabbit immunosera exposed to A. fumigatus conidia; hypoxia induced protein; transcript induced in conidia exposed to neutrophils or to human airway epithelial cells	62.0729	36.36	1	15	15	17	429	46.9681	8.86572
Afu1g09470	Afu7g05740	Afu7g05740 AspGDID:ASPL0000110266 COORDS:Chr7_A_fumigatus_Af293:1404497-1405787W, translated using codon table 1 (340 amino acids) Verified ORF; Putative NAD-dependent malate dehydrogenase; protein abundant in conidia; immunoreactive; reacts with rabbit immunosera exposed to A. fumigatus conidia; induced by L-tyrosine; transcript downregulated in response to hypoxia	61.7468	52.35	1	11	11	13	340	35.8761	9.08545
Afu6g03540	Afu5g14680	Afu5g14680 AspGDID:ASPL0000108517 COORDS:Chr5_A_fumigatus_Af293:3799759-3800442W, translated using codon table 1 (227 amino acids) Verified ORF; Protein with Yap1-dependent induction in response to hydrogen peroxide; calcium downregulated; induced by gliotoxin exposure	61.6377	64.76	1	10	10	15	227	25.4229	4.90674
Afu4g12850	Afu1g12390	Afu1g12390 AspGDID:ASPL0000102306 COORDS:Chr1_A_fumigatus_Af293:3269687-3271809W, translated using codon table 1 (568 amino acids) Uncharacterized ORF; Ortholog of S. cerevisiae SCD6; snoRNA Afu-200 encoded within intron 3	61.5232	32.22	1	11	11	13	568	59.2256	9.5542
Afu1g09970	Afu2g03290	artA AspGDID:ASPL0000103158 COORDS:Chr2_A_fumigatus_Af293:868250-867203C, translated using codon table 1 (261 amino acids) Verified ORF; 14-3-3 family protein; predicted gene pair with AFUA_6G06750; conidia-enriched protein; protein induced by hydrogen peroxide; reacts with rabbit immunosera exposed to A. fumigatus conidia; hypoxia repressed protein	61.2986	57.09	1	11	12	15	261	29.0836	4.84326
Afu3g06110	Afu5g01970	gpdA AspGDID:ASPL0000107377 COORDS:Chr5_A_fumigatus_Af293:503797-505194W, translated using codon table 1 (338 amino acids) Verified ORF; Glyceraldehyde-3-phosphate dehydrogenase; predicted gene pair with AFUA_5G01030; protein induced by hydrogen peroxide; reacts with rabbit immunosera exposed to A. fumigatus conidia: induced by L-tyrosine	60.8174	49.7	1	13	13	15	338	36.2916	7.43018
Afu5g02210	Afu4g11730	gldB AspGDID:ASPL0000106881 COORDS:Chr4_A_fumigatus_Af293:3102011-3103045W, translated using codon table 1 (325 amino acids) Verified ORF; Putative glycerol dehydrogenase; calcium induced; transcript induced by exposure to human airway epithelial cells	60.7209	56.92	1	11	11	13	325	36.8047	6.3667
Afu2g11340	Afu5g02470	nmt1 AspGDID:ASPL0000107427 COORDS:Chr5_A_fumigatus_Af293:638154-636920C, translated using codon table 1 (342 amino acids) Uncharacterized ORF; Thiamine biosynthesis protein, phoB-regulated; protein induced by H2O2; reacts with rabbit immunosera exposed to conidia; hypoxia induced protein; transcript induced by exposure to human airway epithelial cells; induced by gliotoxin	60.6987	47.95	1	11	11	14	342	38.2984	6.44287
Afu6g03810	Afu2g09790	Afu2g09790 AspGDID:ASPL0000103695 COORDS:Chr2_A_fumigatus_Af293:2503042-2501287C, translated using codon table 1 (553 amino acids) Uncharacterized ORF; Putative glucose-6-phosphate isomerase	59.8867	33.63	1	14	14	16	553	61.2771	6.354
Afu4g09750	Afu1g05080	Afu1g05080 AspGDID:ASPL0000101677 COORDS:Chr1_A_fumigatus_Af293:1454060-1455134W, translated using codon table 1 (313 amino acids) Uncharacterized ORF; Putative 60S ribosomal protein P0; reacts with rabbit immunosera exposed to A. fumigatus conidia	59.4187	48.88	1	10	10	14	313	33.4742	5.21143
Afu6g09330	Afu2g16010	Afu2g16010 AspGDID:ASPL0000104318 COORDS:Chr2_A_fumigatus_Af293:4237529-4235525C, translated using codon table 1 (601 amino acids) Uncharacterized ORF; Prolyl-tRNA synthetase	59.0887	32.61	1	14	14	18	601	66.9952	7.1665
Afu5g05460	Afu2g04620	bipA AspGDID:ASPL0000103288 COORDS:Chr2_A_fumigatus_Af293:1260682-1258486C, translated using codon table 1 (672 amino acids) Uncharacterized ORF; Hsp70 chaperone; protein enriched in dormant conidia	58.6151	30.8	1	16	17	18	672	73.3395	5.03369
Afu2g15070	Afu6g12990	Afu6g12990 AspGDID:ASPL0000109642 COORDS:Chr6_A_fumigatus_Af293:3280512-3279334C, translated using codon table 1 (263 amino acids) Uncharacterized ORF; Putative cytosolic large ribosomal subunit protein L7A	58.59	43.35	1	11	11	15	263	29.4273	10.2573
Afu6g03750	Afu6g02470	Afu6g02470 AspGDID:ASPL0000108702 COORDS:Chr6_A_fumigatus_Af293:466824-464770C, translated using codon table 1 (582 amino acids) Uncharacterized ORF; Putative fumarate hydratase; reacts with rabbit immunosera exposed to A. fumigatus conidia	57.7911	28.69	1	10	10	12	582	63.1195	8.96826
Afu5g07000	Afu4g13120	Afu4g13120 AspGDID:ASPL0000107018 COORDS:Chr4_A_fumigatus_Af293:3436372-3434668C, translated using codon table 1 (358 amino acids) Uncharacterized ORF; Putative glutamine synthetase; protein induced by heat shock and by hydrogen peroxide; transcript induced by exposure to human airway epithelial cells	57.6116	43.02	1	10	10	13	358	39.8744	5.70654
Afu1g16480	Afu2g12520	Afu2g12520 AspGDID:ASPL0000103966 COORDS:Chr2_A_fumigatus_Af293:3215341-3219468W, translated using codon table 1 (1045 amino acids) Uncharacterized ORF; Ortholog of <i>A. nidulans FGSC A4</i> : AN6280, <i>A. niger CBS 513.88</i> : An02g04750, <i>A. oryzae RIB40</i> : AO090026000847, <i>Aspergillus wentii</i> : Aspwe1_0044488 and <i>Aspergillus sydowii</i> : Aspsy1_0150855	57.4954	20.77	1	14	14	15	1045	113.109	9.77393
Afu6g12500	Afu2g03390	rpdA AspGDID:ASPL0000103168 COORDS:Chr2_A_fumigatus_Af293:895852-893605C, translated using codon table 1 (688 amino acids) Verified ORF; Putative histone deacetylase; probable essential gene; required for cell growth and conidiation	56.9048	20.49	1	10	10	12	688	75.9845	4.729
Afu4g06890	Afu5g04210	Afu5g04210 AspGDID:ASPL0000107600 COORDS:Chr5_A_fumigatus_Af293:1122054-1123659W, translated using codon table 1 (460 amino acids) Uncharacterized ORF; Putative ubiquinol-cytochrome C reductase complex core protein 2; hypoxia induced protein	56.8952	36.74	1	12	12	13	460	48.06	8.90967
Afu4g04410	Afu2g02100	Afu2g02100 AspGDID:ASPL0000103040 COORDS:Chr2_A_fumigatus_Af293:523316-521496C, translated using codon table 1 (513 amino acids) Uncharacterized ORF; Putative dihydrolipoamide dehydrogenase; reacts with rabbit immunosera exposed to A. fumigatus conidia	55.1722	35.67	1	11	11	13	513	54.9366	8.17725
Afu2g07420	Afu2g08090	Afu2g08090 AspGDID:ASPL0000103529 COORDS:Chr2_A_fumigatus_Af293:2101134-2098578C, translated using codon table 1 (806 amino acids) Uncharacterized ORF; Protein of unknown function, phoB-regulated	55.1235	15.14	1	10	10	14	806	90.9972	9.87646
Afu5g02090	Afu1g13570	Afu1g13570 AspGDID:ASPL0000102425 COORDS:Chr1_A_fumigatus_Af293:3610148-3609177C, translated using codon table 1 (286 amino acids) Uncharacterized ORF; Ortholog(s) have box H/ACA snoRNA binding activity, role in rRNA pseudouridine synthesis, snRNA pseudouridine synthesis and box H/ACA snoRNP complex localization	54.6758	17.13	1	6	6	11	286	31.2846	8.98291
Afu2g13720	Afu1g04620	Afu1g04620 AspGDID:ASPL0000101631 COORDS:Chr1_A_fumigatus_Af293:1309293-1307958C, translated using codon table 1 (348 amino acids) Uncharacterized ORF; Putative zinc-containing alcohol dehydrogenase; reacts with rabbit immunosera exposed to A. fumigatus conidia; hypoxia induced protein; transcript up-regulated in conidia exposed to neutrophils; repressed by gliotoxin exposure	54.6102	47.7	1	12	12	14	348	37.8294	6.63916
Afu2g03140	Afu4g08240	Afu4g08240 AspGDID:ASPL0000106538 COORDS:Chr4_A_fumigatus_Af293:2135925-2137164W, translated using codon table 1 (347 amino acids) Verified ORF; Putative zinc-containing alcohol dehydrogenase; conidia-enriched protein; transcript up-regulated in conidia exposed to neutrophils	54.5758	42.65	1	10	10	12	347	37.4063	7.09326
Afu2g03590	Afu5g06360	Afu5g06360 AspGDID:ASPL0000107712 COORDS:Chr5_A_fumigatus_Af293:1531695-1530676C, translated using codon table 1 (254 amino acids) Uncharacterized ORF; 60S ribosomal protein L8; transcript induced by exposure to human airway epithelial cells	54.5054	43.31	1	7	7	13	254	27.4688	10.9751
Afu5g03480	Afu8g04000	erg10B AspGDID:ASPL0000110735 COORDS:Chr8_A_fumigatus_Af293:855589-857056W, translated using codon table 1 (401 amino acids) Uncharacterized ORF; Putative acetyl-coenzyme A acetyltransferase; protein induced by hydrogen peroxide; higher expression in 48 h biofilm vs planktonic cells; SrbA-regulated during hypoxia	54.2464	42.14	1	10	10	12	401	41.2165	6.87354
Afu5g05820	Afu3g04180	Afu3g04180 AspGDID:ASPL0000104934 COORDS:Chr3_A_fumigatus_Af293:1178361-1177325C, translated using codon table 1 (267 amino acids) Uncharacterized ORF; Has domain(s) with predicted nucleic acid binding, zinc ion binding activity	53.5392	31.84	1	6	6	11	267	29.0843	7.76709
Afu1g13740	Afu2g06150	pdiA AspGDID:ASPL0000103438 COORDS:Chr2_A_fumigatus_Af293:1746610-1744786C, translated using codon table 1 (517 amino acids) Verified ORF; Putative protein disulfide isomerase; conidial surface associated	53.2029	37.33	1	14	14	14	517	56.152	4.70361
Afu5g09400	Afu2g10440	Afu2g10440 AspGDID:ASPL0000103759 COORDS:Chr2_A_fumigatus_Af293:2672089-2671408C, translated using codon table 1 (150 amino acids) Uncharacterized ORF; Ortholog(s) have mRNA binding, small ribosomal subunit rRNA binding activity and role in maturation of SSU-rRNA from tricistronic rRNA transcript (SSU-rRNA, 5.8S rRNA, LSU-rRNA), ribosomal small subunit assembly	52.7421	40	1	5	5	10	150	15.8224	10.7114
Afu6g11620	Afu6g06370	Afu6g06370 AspGDID:ASPL0000108998 COORDS:Chr6_A_fumigatus_Af293:1367479-1369026W, translated using codon table 1 (386 amino acids) Uncharacterized ORF; NAD(+)-isocitrate dehydrogenase subunit I	52.5504	39.38	1	11	11	13	386	41.9387	8.74854
Afu4g14380	Afu4g07690	Afu4g07690 AspGDID:ASPL0000106484 COORDS:Chr4_A_fumigatus_Af293:2001294-2003380W, translated using codon table 1 (595 amino acids) Uncharacterized ORF; Putative phosphoribosylaminoimidazole-carboxamide formyltransferase/IMP cyclohydrolase; hypoxia repressed protein	52.2456	26.89	1	12	12	14	595	64.9875	6.85889
Afu6g06580	Afu3g10920	stm1 AspGDID:ASPL0000105490 COORDS:Chr3_A_fumigatus_Af293:2843930-2842516C, translated using codon table 1 (304 amino acids) Uncharacterized ORF; Telomere and ribosome associated protein	51.9873	41.12	1	9	9	13	304	33.747	9.59814
Afu5g10610	Afu5g04230	cit1 AspGDID:ASPL0000107602 COORDS:Chr5_A_fumigatus_Af293:1129170-1127276C, translated using codon table 1 (474 amino acids) Verified ORF; Putative citrate synthase; reacts with rabbit immunosera exposed to A. fumigatus conidia; transcript induced by exposure to human airway epithelial cells	51.7028	34.39	1	14	14	15	474	52.0791	8.57275
Afu3g07680	Afu5g05540	nap1 AspGDID:ASPL0000107632 COORDS:Chr5_A_fumigatus_Af293:1289638-1291216W, translated using codon table 1 (411 amino acids) Uncharacterized ORF; Putative nucleosome assembly protein	51.2407	33.33	1	10	10	12	411	46.7917	4.55127
Afu1g11480	Afu2g02320	Afu2g02320 AspGDID:ASPL0000103062 COORDS:Chr2_A_fumigatus_Af293:586013-584085C, translated using codon table 1 (571 amino acids) Uncharacterized ORF; Hsp70 chaperone	51.0462	38.18	1	14	14	14	571	61.7457	5.14795
Afu5g02850	Afu6g02540	Afu6g02540 AspGDID:ASPL0000108708 COORDS:Chr6_A_fumigatus_Af293:481139-483203W, translated using codon table 1 (643 amino acids) Uncharacterized ORF; Has domain(s) with predicted actin binding activity	50.5183	31.88	1	14	14	16	643	65.9529	9.5249
Afu1g03960	Afu2g16090	Afu2g16090 AspGDID:ASPL0000104326 COORDS:Chr2_A_fumigatus_Af293:4262510-4260510C, translated using codon table 1 (552 amino acids) Uncharacterized ORF; Karyopherin alpha subunit	50.3542	27.17	1	9	9	12	552	60.6459	5.07178
Afu1g15860	Afu5g10780	uge5 AspGDID:ASPL0000108140 COORDS:Chr5_A_fumigatus_Af293:2756278-2757615W, translated using codon table 1 (371 amino acids) Verified ORF; UDP-glucose 4-epimerase required for galactose metabolism; hypoxia induced protein	50.306	34.5	1	9	9	12	371	40.5836	6.25244
Afu2g02780	Afu6g12630	Afu6g12630 AspGDID:ASPL0000109606 COORDS:Chr6_A_fumigatus_Af293:3191249-3194824W, translated using codon table 1 (1127 amino acids) Uncharacterized ORF; Ortholog(s) have aminoacyl-tRNA editing activity, leucine-tRNA ligase activity, role in leucyl-tRNA aminoacylation, regulation of TOR signaling and cytosol localization	49.8327	15	1	11	11	12	1127	127.11	6.7417
Afu4g03650	Afu1g06710	Afu1g06710 AspGDID:ASPL0000101839 COORDS:Chr1_A_fumigatus_Af293:1922660-1920607C, translated using codon table 1 (564 amino acids) Uncharacterized ORF; Ortholog(s) have chaperonin-containing T-complex, nucleus localization	49.5705	29.08	1	11	11	13	564	60.9935	6.34131
Afu5g07890	Afu6g02280	aspf3 AspGDID:ASPL0000108683 COORDS:Chr6_A_fumigatus_Af293:408478-407732C, translated using codon table 1 (168 amino acids) Verified ORF; Allergen Asp f 3; peroxiredoxin family reductase; putative peroxismal membrane protein; IgE binding; protein induced by heat shock and by exposure to hydrogen peroxide; hypoxia induced protein; induced by gliotoxin exposure	49.3659	79.17	1	9	9	12	168	18.4414	5.57959
Afu7g05870	Afu1g07280	Afu1g07280 AspGDID:ASPL0000101895 COORDS:Chr1_A_fumigatus_Af293:2064833-2066406W, translated using codon table 1 (447 amino acids) Uncharacterized ORF; Ortholog of <i>A. nidulans FGSC A4</i> : AN5141, <i>A. niger CBS 513.88</i> : An07g09830, <i>A. oryzae RIB40</i> : AO090012000982, <i>Aspergillus wentii</i> : Aspwe1_0172497 and <i>Aspergillus sydowii</i> : Aspsy1_0033440	49.1953	21.48	1	7	7	11	447	47.0054	5.42725
Afu6g04790	Afu3g11690	Afu3g11690 AspGDID:ASPL0000105565 COORDS:Chr3_A_fumigatus_Af293:3071255-3069978C, translated using codon table 1 (360 amino acids) Uncharacterized ORF; Putative class II fructose-bisphosphate aldolase; immunoreactive protein; reacts with rabbit immunosera exposed to A. fumigatus conidia; hypoxia induced protein	48.8561	41.11	1	12	12	14	360	39.7659	5.84619
Afu6g08300	Afu1g04070	Afu1g04070 AspGDID:ASPL0000101576 COORDS:Chr1_A_fumigatus_Af293:1161707-1160930C, translated using codon table 1 (157 amino acids) Uncharacterized ORF; Eukaryotic initiation factor 5A; Yap1-dependent induction in response to hydrogen peroxide	47.8394	36.94	1	5	5	8	157	17.1983	5.40186
Afu6g02420	Afu2g16820	Afu2g16820 AspGDID:ASPL0000104401 COORDS:Chr2_A_fumigatus_Af293:4493020-4491357C, translated using codon table 1 (405 amino acids) Uncharacterized ORF; Putative curved DNA-binding protein	47.752	42.96	1	12	12	12	405	44.0373	7.73779
Afu1g11690	Afu2g03610	Afu2g03610 AspGDID:ASPL0000103188 COORDS:Chr2_A_fumigatus_Af293:961023-959122C, translated using codon table 1 (546 amino acids) Uncharacterized ORF; Putative inosine 5'-monophosphate (IMP) dehydrogenase; reacts with rabbit immunosera exposed to A. fumigatus conidia; transcript induced by exposure to human airway epithelial cells; snoRNA Afu-210 encoded within intron 2	47.6516	28.21	1	10	10	11	546	57.9218	6.72705
Afu4g11050	Afu1g13490	Afu1g13490 AspGDID:ASPL0000102417 COORDS:Chr1_A_fumigatus_Af293:3586808-3588296W, translated using codon table 1 (293 amino acids) Uncharacterized ORF; Putative spermidine synthase; protein induced by hydrogen peroxide	47.4154	32.76	1	8	8	9	293	33.4237	5.5415
Afu5g09860	Afu1g07380	Afu1g07380 AspGDID:ASPL0000101904 COORDS:Chr1_A_fumigatus_Af293:2090929-2084331C, translated using codon table 1 (2126 amino acids) Uncharacterized ORF; Putative NADH-dependent glutamate synthase; transcript induced during conidial germination; transcript up-regulated in conidia exposed to neutrophils; SrbA-regulated during hypoxia	47.4017	11.24	1	13	13	13	2126	234.143	6.39209
Afu5g01440	Afu3g10800	Afu3g10800 AspGDID:ASPL0000105478 COORDS:Chr3_A_fumigatus_Af293:2807176-2811179W, translated using codon table 1 (1310 amino acids) Uncharacterized ORF; Ortholog of <i>A. nidulans FGSC A4</i> : AN4908, <i>A. niger CBS 513.88</i> : An02g06530, <i>A. oryzae RIB40</i> : AO090003000629, <i>Aspergillus wentii</i> : Aspwe1_0036953 and <i>Aspergillus sydowii</i> : Aspsy1_0043015	47.2846	13.89	1	11	11	12	1310	145.89	7.09326
Afu2g03580	Afu6g03440	Afu6g03440 AspGDID:ASPL0000108799 COORDS:Chr6_A_fumigatus_Af293:738342-736781C, translated using codon table 1 (497 amino acids) Uncharacterized ORF; Putative fructosyl amine; transcript induced by voriconazole	47.0227	33.4	1	11	11	12	497	54.895	5.75732
Afu1g09840	Afu4g04520	Afu4g04520 AspGDID:ASPL0000106270 COORDS:Chr4_A_fumigatus_Af293:1276859-1275057C, translated using codon table 1 (444 amino acids) Uncharacterized ORF; Ortholog(s) have mitochondrion localization	46.5631	41.22	1	16	16	16	444	47.9867	5.70654
Afu1g02980	Afu5g03560	Afu5g03560 AspGDID:ASPL0000107534 COORDS:Chr5_A_fumigatus_Af293:963324-960949C, translated using codon table 1 (715 amino acids) Uncharacterized ORF; Putative glutamyl-tRNA synthetase; transcript induced by exposure to human airway epithelial cells	46.3182	24.76	1	11	11	12	715	81.3732	7.53271
Afu6g07760	Afu2g09210	Afu2g09210 AspGDID:ASPL0000103639 COORDS:Chr2_A_fumigatus_Af293:2359448-2360452W, translated using codon table 1 (223 amino acids) Uncharacterized ORF; 60S ribosomal protein L10; reacts with rabbit immunosera exposed to A. fumigatus conidia	45.7764	53.36	1	12	12	13	223	25.5705	10.3159
Afu1g02670	Afu2g10070	Afu2g10070 AspGDID:ASPL0000103722 COORDS:Chr2_A_fumigatus_Af293:2576586-2580364W, translated using codon table 1 (1175 amino acids) Uncharacterized ORF; Putative carbamoyl-phosphate synthetase, large subunit	45.7419	14.64	1	10	12	13	1175	129.134	6.21436
Afu2g10520	Afu6g09990	Afu6g09990 AspGDID:ASPL0000109355 COORDS:Chr6_A_fumigatus_Af293:2459187-2462825W, translated using codon table 1 (1095 amino acids) Uncharacterized ORF; Ortholog(s) have cytosol, nuclear envelope, nuclear membrane, nucleolus localization	45.6745	14.06	1	11	11	11	1095	121.526	4.729
Afu3g11300	Afu3g14490	Afu3g14490 AspGDID:ASPL0000105838 COORDS:Chr3_A_fumigatus_Af293:3844977-3843396C, translated using codon table 1 (508 amino acids) Uncharacterized ORF; Putative ketol acid reductoisomerase; transcript induced by exposure to human airway epithelial cells; no human homolog	45.6092	21.46	1	11	11	13	508	56.3183	9.29053
Afu8g04340	Afu5g12180	Afu5g12180 AspGDID:ASPL0000108274 COORDS:Chr5_A_fumigatus_Af293:3157322-3158399W, translated using codon table 1 (247 amino acids) Uncharacterized ORF; Ortholog(s) have Ran GTPase binding activity and role in G1/S transition of mitotic cell cycle, RNA export from nucleus, Ran protein signal transduction, protein import into nucleus, ubiquitin-dependent protein catabolic process	45.2916	48.18	1	7	7	9	247	27.6266	4.98291
Afu2g08280	Afu2g13250	trpB AspGDID:ASPL0000104039 COORDS:Chr2_A_fumigatus_Af293:3407647-3405303C, translated using codon table 1 (735 amino acids) Uncharacterized ORF; Putative bifunctional tryptophan synthase	44.3981	22.31	1	8	8	9	735	78.7133	5.96045
Afu6g04970	Afu7g02180	Afu7g02180 AspGDID:ASPL0000110013 COORDS:Chr7_A_fumigatus_Af293:584569-586235W, translated using codon table 1 (509 amino acids) Uncharacterized ORF; Ortholog(s) have UDP-N-acetylglucosamine diphosphorylase activity, role in UDP-N-acetylglucosamine biosynthetic process and cytosol, nucleus localization	44.123	29.27	1	12	12	13	509	56.6802	6.1001
Afu5g08050	Afu1g16840	Afu1g16840 AspGDID:ASPL0000102749 COORDS:Chr1_A_fumigatus_Af293:4595884-4595128C, translated using codon table 1 (179 amino acids) Uncharacterized ORF; TCTP family protein	43.5297	44.13	1	7	7	8	179	20.234	4.97021
Afu5g07050	Afu3g08650	Afu3g08650 AspGDID:ASPL0000105267 COORDS:Chr3_A_fumigatus_Af293:2214642-2217724W, translated using codon table 1 (939 amino acids) Uncharacterized ORF; Putative C1-tetrahydrofolate synthase; transcript up-regulated in conidia exposed to neutrophils	43.3173	20.13	1	13	13	13	939	100.46	7.44482
Afu5g03520	Afu5g09330	cipC AspGDID:ASPL0000108002 COORDS:Chr5_A_fumigatus_Af293:2402867-2402275C, translated using codon table 1 (130 amino acids) Verified ORF; CipC-like, hyphal-specific protein; not concanamycin A or stress induced as it is in A. nidulans; reacts with rabbit immunosera exposed to A. fumigatus conidia	43.2724	53.85	1	8	8	11	130	15.0433	6.26514
Afu6g06350	Afu6g12300	Afu6g12300 AspGDID:ASPL0000109574 COORDS:Chr6_A_fumigatus_Af293:3095007-3092936C, translated using codon table 1 (478 amino acids) Verified ORF; RNP domain protein; conidia-enriched protein	42.97	27.82	1	9	9	11	478	51.7352	9.5542
Afu2g08970	Afu4g03860	nip1 AspGDID:ASPL0000106205 COORDS:Chr4_A_fumigatus_Af293:1086172-1088854W, translated using codon table 1 (862 amino acids) Uncharacterized ORF; Eukaryotic translation initiation factor 3 subunit C	42.874	16.71	1	11	11	12	862	97.4481	5.13525
Afu3g11350	Afu4g10800	Afu4g10800 AspGDID:ASPL0000106793 COORDS:Chr4_A_fumigatus_Af293:2823433-2822224C, translated using codon table 1 (237 amino acids) Uncharacterized ORF; 40S ribosomal protein S6	42.732	43.88	1	10	10	13	237	27.263	10.8433
Afu6g02910	Afu1g09100	Afu1g09100 AspGDID:ASPL0000101976 COORDS:Chr1_A_fumigatus_Af293:2363153-2364329W, translated using codon table 1 (192 amino acids) Uncharacterized ORF; 60S ribosomal protein L9	42.4993	68.75	1	10	10	11	192	21.8297	9.67139
Afu1g06210	Afu6g03820	egd2 AspGDID:ASPL0000108837 COORDS:Chr6_A_fumigatus_Af293:841323-840546C, translated using codon table 1 (204 amino acids) Uncharacterized ORF; Nascent polypeptide-associated complex subunit alpha; predicted role in 'de novo' cotranslational protein folding; enriched in dormant conidia	42.4536	47.06	1	5	5	7	204	21.959	4.94482
Afu4g08110	Afu4g09140	car2 AspGDID:ASPL0000106629 COORDS:Chr4_A_fumigatus_Af293:2388283-2389697W, translated using codon table 1 (450 amino acids) Uncharacterized ORF; L-ornithine aminotransferase; induced by growth on BSA as a sole nitrogen source; SrbA-regulated during hypoxia	42.0532	31.78	1	11	11	12	450	49.0863	6.53662
Afu6g08920	Afu2g09490	Afu2g09490 AspGDID:ASPL0000103667 COORDS:Chr2_A_fumigatus_Af293:2422679-2427552W, translated using codon table 1 (1525 amino acids) Uncharacterized ORF; Eukaryotic translation initiation factor subunit eIF-4F	41.9456	10.43	1	8	8	10	1525	163.883	9.36377
Afu8g05330	Afu3g09290	Afu3g09290 AspGDID:ASPL0000105327 COORDS:Chr3_A_fumigatus_Af293:2357229-2355494C, translated using codon table 1 (520 amino acids) Verified ORF; Putative 2,3-bisphosphoglycerate-independent phosphoglycerate mutase; protein abundant in conidia; reacts with rabbit immunosera exposed to A. fumigatus conidia; transcript induced by exposure to human airway epithelial cells	41.8787	25.19	1	7	7	9	520	57.418	5.66846
Afu6g00660	Afu4g12390	Afu4g12390 AspGDID:ASPL0000106946 COORDS:Chr4_A_fumigatus_Af293:3243337-3244737W, translated using codon table 1 (394 amino acids) Uncharacterized ORF; Ortholog(s) have role in negative regulation of induction of conjugation with cellular fusion, negative regulation of transcription from RNA polymerase II promoter and cytoplasm, nucleus localization	41.7984	35.53	1	10	10	11	394	43.1402	7.21045
Afu6g10610	Afu1g01740	Afu1g01740 AspGDID:ASPL0000101344 COORDS:Chr1_A_fumigatus_Af293:538203-536416C, translated using codon table 1 (531 amino acids) Uncharacterized ORF; Ortholog(s) have unfolded protein binding activity, role in protein folding and chaperonin-containing T-complex, nucleus localization	41.7858	24.86	1	8	9	11	531	57.1551	6.21436
Afu6g11430	Afu6g06900	rho1 AspGDID:ASPL0000109052 COORDS:Chr6_A_fumigatus_Af293:1523942-1524891W, translated using codon table 1 (193 amino acids) Verified ORF; Putative Rho-type GTPase; predominantly localize to the hyphal tip; involved in radial growth and conidiation; mutants display cytoplasmic leakage at the hyphal tips	41.3318	50.26	1	8	8	11	193	21.6873	6.771
Afu4g11260	Afu4g11720	Afu4g11720 AspGDID:ASPL0000106880 COORDS:Chr4_A_fumigatus_Af293:3100984-3098931C, translated using codon table 1 (613 amino acids) Uncharacterized ORF; Putative phosphatidyl synthase; protein levels increase in response to pkaC overexpression	41.2367	26.1	1	12	12	12	613	67.0703	6.55127
Afu1g09280	Afu2g10100	aspf8 AspGDID:ASPL0000103725 COORDS:Chr2_A_fumigatus_Af293:2585506-2585100C, translated using codon table 1 (111 amino acids) Uncharacterized ORF; Allergen Asp f 8; putative ribosomal protein P2; transcript induced by growth on hydrogen peroxide and menadione	40.7786	79.28	1	4	5	7	111	11.1346	4.33545
Afu2g15870	Afu1g05200	tif32 AspGDID:ASPL0000101689 COORDS:Chr1_A_fumigatus_Af293:1488654-1485294C, translated using codon table 1 (1051 amino acids) Uncharacterized ORF; Eukaryotic translation initiation factor 3 subunit A	40.3793	14.37	1	11	11	12	1051	120.156	9.39307
AfuMt00120	Afu7g03680	Afu7g03680 AspGDID:ASPL0000110063 COORDS:Chr7_A_fumigatus_Af293:790326-786496C, translated using codon table 1 (1160 amino acids) Uncharacterized ORF; Ortholog(s) have inositol-polyphosphate 5-phosphatase activity and cell division site, cell tip, cytosol localization	40.2197	12.16	1	11	11	13	1160	129.673	6.72705
Afu2g09310	Afu6g14330	Afu6g14330 AspGDID:ASPL0000109772 COORDS:Chr6_A_fumigatus_Af293:3648908-3645016C, translated using codon table 1 (1281 amino acids) Uncharacterized ORF; Ortholog(s) have cytosol localization	40.1991	13.58	1	10	10	10	1281	138.541	6.12549
Afu2g15290	Afu5g08540	aspA AspGDID:ASPL0000107925 COORDS:Chr5_A_fumigatus_Af293:2167838-2169399W, translated using codon table 1 (382 amino acids) Verified ORF; Septin; hypoxia repressed protein; repressed by exposure to artemisinin	39.5509	39.27	1	10	10	11	382	43.2901	5.13525
Afu3g08640	Afu1g15810	Afu1g15810 AspGDID:ASPL0000102644 COORDS:Chr1_A_fumigatus_Af293:4274274-4272405C, translated using codon table 1 (566 amino acids) Uncharacterized ORF; Ortholog(s) have role in ascospore formation, sporocarp development involved in sexual reproduction and nucleus localization	38.9709	17.31	1	6	6	9	566	63.936	9.37842
Afu4g12840	Afu4g08580	prx1 AspGDID:ASPL0000106571 COORDS:Chr4_A_fumigatus_Af293:2220262-2219313C, translated using codon table 1 (222 amino acids) Uncharacterized ORF; Mitochondrial peroxiredoxin; predicted role in cell redox homeostasis regulation; protein levels increase with amphotericin B and H2O2 exposure; transcript up-regulated in conidia exposed to neutrophils; repressed by gliotoxin exposure	38.9063	63.06	1	9	9	10	222	24.5287	6.13818
Afu8g01670	Afu3g11860	eb1 AspGDID:ASPL0000105582 COORDS:Chr3_A_fumigatus_Af293:3124507-3123064C, translated using codon table 1 (278 amino acids) Uncharacterized ORF; Putative microtubule associated protein	38.8985	37.41	1	6	6	7	278	30.6318	7.48877
Afu5g06060	Afu1g15020	Afu1g15020 AspGDID:ASPL0000102569 COORDS:Chr1_A_fumigatus_Af293:4039457-4040397W, translated using codon table 1 (215 amino acids) Uncharacterized ORF; 40S ribosomal protein S5; reacts with rabbit immunosera exposed to A. fumigatus conidia	38.742	54.42	1	9	9	10	215	23.8905	9.21729
Afu4g10010	Afu2g14990	Afu2g14990 AspGDID:ASPL0000104214 COORDS:Chr2_A_fumigatus_Af293:3948734-3946908C, translated using codon table 1 (451 amino acids) Uncharacterized ORF; Tubulin alpha-2 subunit; gene pair with AFUA_1G02550 (tubulin alpha-1 subunit)	38.7271	30.82	1	7	8	9	451	50.4098	5.16064
Afu8g05530	Afu2g10750	Afu2g10750 AspGDID:ASPL0000103790 COORDS:Chr2_A_fumigatus_Af293:2752834-2755410W, translated using codon table 1 (549 amino acids) Uncharacterized ORF; Putative RNA helicase; transcript induced by exposure to human airway epithelial cells	38.6905	24.95	1	10	11	11	549	60.3154	9.23193
Afu4g10790	Afu5g05630	Afu5g05630 AspGDID:ASPL0000107640 COORDS:Chr5_A_fumigatus_Af293:1313445-1312542C, translated using codon table 1 (154 amino acids) Uncharacterized ORF; 60S ribosomal protein L23	38.2858	43.51	1	9	9	11	154	17.0726	10.3306
Afu2g14210	Afu5g03130	Afu5g03130 AspGDID:ASPL0000107492 COORDS:Chr5_A_fumigatus_Af293:847533-849130W, translated using codon table 1 (436 amino acids) Uncharacterized ORF; Ortholog(s) have sequence-specific DNA binding activity	38.109	34.86	1	7	7	9	436	48.9211	5.021
Afu1g05620	Afu2g11060	Afu2g11060 AspGDID:ASPL0000103821 COORDS:Chr2_A_fumigatus_Af293:2836626-2837531W, translated using codon table 1 (158 amino acids) Uncharacterized ORF; Putative acylCoA binding family protein	38.0089	50.63	1	6	6	8	158	17.2987	5.99854
Afu6g05080	Afu3g13320	rps0 AspGDID:ASPL0000105727 COORDS:Chr3_A_fumigatus_Af293:3533778-3534743W, translated using codon table 1 (297 amino acids) Uncharacterized ORF; Putative 40S ribosomal protein S0	37.6438	34.68	1	7	7	9	297	32.1022	4.90674
Afu1g02070	Afu2g07810	Afu2g07810 AspGDID:ASPL0000103501 COORDS:Chr2_A_fumigatus_Af293:1998025-1999850W, translated using codon table 1 (537 amino acids) Uncharacterized ORF; Putative cytosolic hydroxymethyltransferase	37.445	23.46	1	6	7	8	537	58.7963	8.85107
Afu2g05340	Afu1g15730	Afu1g15730 AspGDID:ASPL0000102636 COORDS:Chr1_A_fumigatus_Af293:4254406-4255080W, translated using codon table 1 (130 amino acids) Uncharacterized ORF; 40S ribosomal protein S22	37.3379	56.15	1	6	6	9	130	14.6648	9.65674
Afu1g02110	Afu8g04090	codA AspGDID:ASPL0000110744 COORDS:Chr8_A_fumigatus_Af293:888631-890353W, translated using codon table 1 (542 amino acids) Verified ORF; Putative choline oxidase; AFUB_083470 choA ortholog	37.1708	24.35	1	9	9	10	542	60.1474	6.84424
Afu5g05680	Afu5g08090	pyroA AspGDID:ASPL0000107881 COORDS:Chr5_A_fumigatus_Af293:2051048-2050001C, translated using codon table 1 (308 amino acids) Uncharacterized ORF; Putative pyridoxine biosynthesis protein	37.0127	35.39	1	9	9	11	308	32.7158	6.43018
Afu1g04890	Afu6g07430	Afu6g07430 AspGDID:ASPL0000109105 COORDS:Chr6_A_fumigatus_Af293:1677465-1679554W, translated using codon table 1 (527 amino acids) Uncharacterized ORF; Putative pyruvate kinase; reacts with rabbit immunosera exposed to A. fumigatus conidia	36.8135	29.98	1	12	12	13	527	58.348	7.03467
Afu3g10700	Afu6g07720	acuF AspGDID:ASPL0000109132 COORDS:Chr6_A_fumigatus_Af293:1757338-1754889C, translated using codon table 1 (601 amino acids) Uncharacterized ORF; Putative phosphoenolpyruvate carboxykinase; transcript up-regulated in conidia exposed to neutrophils; transcript downregulated in response to hypoxia	36.686	22.3	1	9	9	9	601	66.6781	6.17627
Afu4g08140	Afu3g11360	Afu3g11360 AspGDID:ASPL0000105534 COORDS:Chr3_A_fumigatus_Af293:2979671-2978196C, translated using codon table 1 (451 amino acids) Uncharacterized ORF; Ortholog(s) have role in ascospore formation, cellular protein localization, cellular response to caffeine and eukaryotic translation initiation factor 3 complex assembly, <a href="#GOsection">more</a>	36.6664	25.94	1	9	9	10	451	51.7173	5.35107
Afu4g06690	Afu4g06910	Afu4g06910 AspGDID:ASPL0000106405 COORDS:Chr4_A_fumigatus_Af293:1790067-1791391W, translated using codon table 1 (284 amino acids) Uncharacterized ORF; Putative outer mitochondrial membrane protein porin; hypoxia induced protein	36.6285	39.08	1	5	5	7	284	30.0075	8.99756
Afu6g06500	Afu1g14200	Afu1g14200 AspGDID:ASPL0000102488 COORDS:Chr1_A_fumigatus_Af293:3795841-3794154C, translated using codon table 1 (479 amino acids) Verified ORF; Putative mitochondrial processing peptidase beta subunit; induced by gliotoxin exposure	36.495	27.35	1	8	8	9	479	53.2372	6.30322
Afu2g14960	Afu2g00720	Afu2g00720 AspGDID:ASPL0000102904 COORDS:Chr2_A_fumigatus_Af293:161113-162800W, translated using codon table 1 (492 amino acids) Uncharacterized ORF; Putative aldehyde dehydrogenase (NAD+)	36.2909	24.39	1	9	9	10	492	51.9098	5.80811
Afu5g05550	Afu3g05370	Afu3g05370 AspGDID:ASPL0000104953 COORDS:Chr3_A_fumigatus_Af293:1293607-1295556W, translated using codon table 1 (461 amino acids) Uncharacterized ORF; Putative dihydrolipoamide succinyltransferase; reacts with rabbit immunosera exposed to A. fumigatus conidia; hypoxia induced protein; transcript induced by exposure to human airway epithelial cells	36.2878	18.22	1	6	6	10	461	50.3374	8.88037
Afu6g12530	Afu7g04210	Afu7g04210 AspGDID:ASPL0000110116 COORDS:Chr7_A_fumigatus_Af293:951859-952611W, translated using codon table 1 (161 amino acids) Uncharacterized ORF; Putative tropomyosin 1; protein induced by hydrogen peroxide; reacts with rabbit immunosera exposed to A. fumigatus conidia	36.2085	44.1	1	5	5	8	161	18.7575	5.03369
Afu5g03990	Afu1g11130	Afu1g11130 AspGDID:ASPL0000102176 COORDS:Chr1_A_fumigatus_Af293:2932858-2933809W, translated using codon table 1 (200 amino acids) Uncharacterized ORF; 60S ribosomal protein L6	36.0025	35.5	1	6	6	9	200	22.4393	10.1548
Afu2g03400	Afu2g02070	Afu2g02070 AspGDID:ASPL0000103037 COORDS:Chr2_A_fumigatus_Af293:511840-513846W, translated using codon table 1 (620 amino acids) Uncharacterized ORF; Ortholog(s) have cytosol localization	35.2631	20.16	1	8	8	9	620	69.1576	6.32861
Afu2g11020	Afu3g11430	Afu3g11430 AspGDID:ASPL0000105541 COORDS:Chr3_A_fumigatus_Af293:2998674-2997540C, translated using codon table 1 (324 amino acids) Uncharacterized ORF; Putative arginase; SrbA-regulated during hypoxia	35.0713	25.62	1	5	5	7	324	35.42	5.87158
Afu2g05510	Afu1g11730	Afu1g11730 AspGDID:ASPL0000102237 COORDS:Chr1_A_fumigatus_Af293:3087288-3088069W, translated using codon table 1 (183 amino acids) Uncharacterized ORF; Ortholog(s) have GTPase activity, role in ER to Golgi vesicle-mediated transport, Golgi to plasma membrane transport, cellular response to drug, macroautophagy and Golgi apparatus, glyoxysome localization	35.0185	52.46	1	6	6	8	183	20.9899	5.70654
Afu2g12180	Afu2g05910	hxkA AspGDID:ASPL0000103414 COORDS:Chr2_A_fumigatus_Af293:1662852-1664600W, translated using codon table 1 (490 amino acids) Verified ORF; Putative hexokinase; protein induced by heat shock	34.9637	25.1	1	7	7	8	490	54.1746	5.17334
Afu5g10650	Afu1g12800	Afu1g12800 AspGDID:ASPL0000102348 COORDS:Chr1_A_fumigatus_Af293:3382593-3384187W, translated using codon table 1 (385 amino acids) Uncharacterized ORF; Putative NADPH isocitrate dehydrogenase; transcript induced during conidial germination	34.6872	25.71	1	7	7	9	385	41.7008	8.51416
Afu2g06040	Afu4g03880	Afu4g03880 AspGDID:ASPL0000106207 COORDS:Chr4_A_fumigatus_Af293:1090760-1092367W, translated using codon table 1 (251 amino acids) Uncharacterized ORF; 60S ribosomal protein L7	34.6199	31.47	1	7	7	8	251	29.0066	10.0376
Afu4g08600	Afu4g04460	Afu4g04460 AspGDID:ASPL0000106264 COORDS:Chr4_A_fumigatus_Af293:1261402-1262578W, translated using codon table 1 (226 amino acids) Uncharacterized ORF; 60S ribosomal protein L13	34.5334	40.71	1	11	11	12	226	25.6361	10.6528
Afu5g14330	Afu3g06970	Afu3g06970 AspGDID:ASPL0000105108 COORDS:Chr3_A_fumigatus_Af293:1743190-1744103W, translated using codon table 1 (193 amino acids) Uncharacterized ORF; 40S ribosomal protein S9; transcript induced by exposure to human airway epithelial cells	34.4798	46.63	1	11	11	11	193	22.1891	10.0522
Afu5g09910	Afu1g06830	rpp1 AspGDID:ASPL0000101851 COORDS:Chr1_A_fumigatus_Af293:1948201-1948863W, translated using codon table 1 (111 amino acids) Uncharacterized ORF; Putative 60s acidic ribosomal protein superfamily member; putative ribosomal stalk protein	34.1797	55.86	1	4	4	5	111	11.1215	4.17041
Afu6g12820	Afu1g02030	Afu1g02030 AspGDID:ASPL0000101373 COORDS:Chr1_A_fumigatus_Af293:600839-603263W, translated using codon table 1 (740 amino acids) Uncharacterized ORF; Putative eukaryotic translation initiation factor 3 subunit; protein induced by heat shock	34.1145	18.11	1	9	9	11	740	84.4348	5.35107
Afu4g07340	Afu6g13460	Afu6g13460 AspGDID:ASPL0000109687 COORDS:Chr6_A_fumigatus_Af293:3429190-3426694C, translated using codon table 1 (814 amino acids) Uncharacterized ORF; Ortholog of <i>A. nidulans FGSC A4</i> : AN5448, <i>A. niger CBS 513.88</i> : An08g08850, <i>Neosartorya fischeri NRRL 181</i> : NFIA_059420, <i>Aspergillus wentii</i> : Aspwe1_0194392 and <i>Aspergillus versicolor</i> : Aspve1_0053254	34.071	15.85	1	10	10	13	814	90.3871	8.47021
Afu4g10020	Afu1g09390	Afu1g09390 AspGDID:ASPL0000102005 COORDS:Chr1_A_fumigatus_Af293:2433870-2432848C, translated using codon table 1 (303 amino acids) Uncharacterized ORF; Ortholog of <i>A. niger CBS 513.88</i> : An08g00930, <i>A. oryzae RIB40</i> : AO090005001586, <i>Neosartorya fischeri NRRL 181</i> : NFIA_016220, <i>Aspergillus wentii</i> : Aspwe1_0024550 and <i>Aspergillus versicolor</i> : Aspve1_0119823	33.9622	22.77	1	6	6	9	303	34.7225	11.3853
Afu5g09850	Afu1g17000	Afu1g17000 AspGDID:ASPL0000102765 COORDS:Chr1_A_fumigatus_Af293:4639817-4640623W, translated using codon table 1 (268 amino acids) Uncharacterized ORF; Ortholog of <i>A. nidulans FGSC A4</i> : AN0631, <i>A. niger CBS 513.88</i> : An01g09850, <i>A. oryzae RIB40</i> : AO090005000975, <i>Aspergillus wentii</i> : Aspwe1_0068188 and <i>Aspergillus sydowii</i> : Aspsy1_0041402	33.8659	44.4	1	6	6	7	268	28.6926	9.67139
Afu1g03490	Afu2g05520	Afu2g05520 AspGDID:ASPL0000103375 COORDS:Chr2_A_fumigatus_Af293:1539047-1543267W, translated using codon table 1 (1350 amino acids) Uncharacterized ORF; Ortholog of <i>A. nidulans FGSC A4</i> : AN7496, <i>A. niger CBS 513.88</i> : An02g13860, <i>A. oryzae RIB40</i> : AO090001000663, <i>Aspergillus wentii</i> : Aspwe1_0121457 and <i>Aspergillus sydowii</i> : Aspsy1_0058467	33.6038	9.11	1	9	9	9	1350	144.934	9.18799
Afu4g09010	Afu1g11710	Afu1g11710 AspGDID:ASPL0000102235 COORDS:Chr1_A_fumigatus_Af293:3080890-3079981C, translated using codon table 1 (217 amino acids) Uncharacterized ORF; Ribosomal protein L1	33.4136	24.88	1	5	5	8	217	24.2372	9.86182
Afu2g12450	Afu2g10300	Afu2g10300 AspGDID:ASPL0000103745 COORDS:Chr2_A_fumigatus_Af293:2636570-2637526W, translated using codon table 1 (198 amino acids) Uncharacterized ORF; 40S ribosomal protein S17	33.3437	31.31	1	5	5	8	198	22.6521	9.99365
Afu2g15590	Afu4g12990	trr1 AspGDID:ASPL0000107005 COORDS:Chr4_A_fumigatus_Af293:3402102-3403373W, translated using codon table 1 (392 amino acids) Uncharacterized ORF; Putative thioredoxin reductase; transcript upregulated during conidial germination and in hyphae exposed to neutrophils	32.9665	33.67	1	7	7	7	392	42.1635	5.51611
Afu6g12790	Afu4g13730	Afu4g13730 AspGDID:ASPL0000107079 COORDS:Chr4_A_fumigatus_Af293:3595758-3593623C, translated using codon table 1 (684 amino acids) Uncharacterized ORF; Ortholog of <i>A. nidulans FGSC A4</i> : AN5667, <i>A. oryzae RIB40</i> : AO090009000198, <i>Aspergillus wentii</i> : Aspwe1_0047212, <i>Aspergillus sydowii</i> : Aspsy1_0030299 and <i>Aspergillus terreus NIH2624</i> : ATET_03253	32.8077	14.18	1	7	7	10	684	73.7219	9.34912
Afu8g03920	Afu2g07620	Afu2g07620 AspGDID:ASPL0000103483 COORDS:Chr2_A_fumigatus_Af293:1942912-1941117C, translated using codon table 1 (534 amino acids) Uncharacterized ORF; Cystathionine beta-synthase; transcript induced by exposure to human airway epithelial cells	32.7931	25.84	1	9	9	9	534	57.7783	6.97607
Afu3g08970	Afu5g06190	steA AspGDID:ASPL0000107696 COORDS:Chr5_A_fumigatus_Af293:1482488-1484873W, translated using codon table 1 (688 amino acids) Uncharacterized ORF; Putative transcription factor	32.7309	15.99	1	9	9	10	688	76.5834	6.63916
Afu2g10920	Afu7g05720	Afu7g05720 AspGDID:ASPL0000110264 COORDS:Chr7_A_fumigatus_Af293:1398605-1400277W, translated using codon table 1 (485 amino acids) Uncharacterized ORF; Pyruvate dehydrogenase complex, dihydrolipoamide acetyltransferase component; hypoxia induced protein	32.6895	23.51	1	7	7	7	485	51.9993	6.68311
Afu7g02020	Afu3g08660	idp1 AspGDID:ASPL0000105268 COORDS:Chr3_A_fumigatus_Af293:2219058-2221293W, translated using codon table 1 (501 amino acids) Uncharacterized ORF; Putative isocitrate dehydrogenase; protein induced by heat shock	31.8847	22.36	1	11	11	11	501	55.7396	8.73389
Afu1g12580	Afu3g12300	Afu3g12300 AspGDID:ASPL0000105626 COORDS:Chr3_A_fumigatus_Af293:3242604-3243283W, translated using codon table 1 (124 amino acids) Uncharacterized ORF; 60S ribosomal protein L22	31.8754	52.42	1	6	6	9	124	14.1826	9.40771
Afu2g06230	Afu3g11400	pep2 AspGDID:ASPL0000105538 COORDS:Chr3_A_fumigatus_Af293:2990626-2992029W, translated using codon table 1 (398 amino acids) Verified ORF; Aspartic acid endopeptidase; conidia-enriched protein; conidial surface associated; predicted signal secretion sequence; hypoxia induced protein; transcript up-regulated in conidia exposed to neutrophils and by growth on BSA	31.4227	25.88	1	6	6	7	398	43.3277	4.99561
Afu3g06210	Afu2g02590	Afu2g02590 AspGDID:ASPL0000103089 COORDS:Chr2_A_fumigatus_Af293:666730-668457W, translated using codon table 1 (555 amino acids) Uncharacterized ORF; Aspartyl-tRNA synthetase	31.13	16.76	1	7	7	8	555	61.5887	6.32861
Afu1g09930	Afu6g08360	Afu6g08360 AspGDID:ASPL0000109193 COORDS:Chr6_A_fumigatus_Af293:1958167-1959214W, translated using codon table 1 (332 amino acids) Uncharacterized ORF; Thiazole biosynthesis enzyme; hypoxia induced protein; induced by gliotoxin exposure	30.8933	21.69	1	3	3	5	332	35.469	5.84619
Afu1g06190	Afu5g10770	Afu5g10770 AspGDID:ASPL0000108139 COORDS:Chr5_A_fumigatus_Af293:2751921-2754552W, translated using codon table 1 (820 amino acids) Uncharacterized ORF; Ortholog(s) have cytoplasmic mRNA processing body, cytosol localization	30.7961	13.66	1	8	8	11	820	90.9857	6.27783
Afu6g03590	Afu1g06170	Afu1g06170 AspGDID:ASPL0000101785 COORDS:Chr1_A_fumigatus_Af293:1784284-1782664C, translated using codon table 1 (464 amino acids) Uncharacterized ORF; Ortholog(s) have role in positive regulation of RNA polymerase II transcriptional preinitiation complex assembly, proteasome regulatory particle assembly, ubiquitin-dependent protein catabolic process	30.7176	20.47	1	7	7	8	464	51.6705	4.97021
Afu5g10120	Afu4g12920	Afu4g12920 AspGDID:ASPL0000106998 COORDS:Chr4_A_fumigatus_Af293:3384591-3386472W, translated using codon table 1 (604 amino acids) Uncharacterized ORF; Putative mitochondrial histidyl-tRNA synthetase; protein induced by heat shock	30.6688	21.52	1	8	8	8	604	66.6164	7.13721
Afu8g05560	Afu3g07810	sdh1 AspGDID:ASPL0000105185 COORDS:Chr3_A_fumigatus_Af293:1970306-1968056C, translated using codon table 1 (647 amino acids) Uncharacterized ORF; Succinate dehydrogenase flavoprotein subunit; role in the citric acid cycle; up-regulated in conidia exposed to neutrophils and during conidial germination; hypoxia repressed protein and transcript; induced by exposure to artemisinin	30.5043	13.14	1	6	6	8	647	71.1033	6.97607
Afu3g10300	Afu5g04250	cysD AspGDID:ASPL0000107604 COORDS:Chr5_A_fumigatus_Af293:1136288-1134676C, translated using codon table 1 (434 amino acids) Uncharacterized ORF; Homocysteine synthase; transcript up-regulated in conidia exposed to neutrophils	30.4268	20.97	1	5	5	6	434	46.8658	6.354
Afu4g10780	Afu6g02230	glkA AspGDID:ASPL0000108678 COORDS:Chr6_A_fumigatus_Af293:395467-393918C, translated using codon table 1 (493 amino acids) Verified ORF; Putative glucokinase; conidia-enriched protein; transcripts extremely abundant in resting conidia, levels decline during germination; transcript induced by exposure to human airway epithelial cells	30.3899	18.66	1	7	7	9	493	54.4198	5.50342
Afu6g08810	Afu2g10030	Afu2g10030 AspGDID:ASPL0000103718 COORDS:Chr2_A_fumigatus_Af293:2570628-2569665C, translated using codon table 1 (265 amino acids) Uncharacterized ORF; Immunoreactive protein; calcium induced; transcript induced by exposure to human airway epithelial cells; induced by gliotoxin exposure	30.1598	42.64	1	8	8	9	265	28.2482	6.3667
Afu2g13010	Afu5g09240	sod1 AspGDID:ASPL0000107993 COORDS:Chr5_A_fumigatus_Af293:2379492-2380591W, translated using codon table 1 (154 amino acids) Verified ORF; Cu/Zn superoxide dismutase; recognized by sera from aspergillosis patients; highly expressed in conidia; transcript induced by copper starvation, menadione, gliotoxin and growth at high temperature; protein induced by hydrogen peroxide	29.8951	51.3	1	4	4	5	154	15.9569	6.52197
Afu2g09180	Afu2g04310	Afu2g04310 AspGDID:ASPL0000103257 COORDS:Chr2_A_fumigatus_Af293:1189815-1188083C, translated using codon table 1 (416 amino acids) Uncharacterized ORF; Argininosuccinate synthase; hypoxia induced protein	29.8802	26.44	1	10	10	11	416	46.1043	5.47803
Afu2g10620	Afu2g08360	pyrG AspGDID:ASPL0000103555 COORDS:Chr2_A_fumigatus_Af293:2153922-2153018C, translated using codon table 1 (278 amino acids) Verified ORF; Orotidine 5'-monophosphate decarboxylase	29.8226	32.73	1	8	8	9	278	30.2485	6.69775
Afu6g01910	Afu4g04350	Afu4g04350 AspGDID:ASPL0000106252 COORDS:Chr4_A_fumigatus_Af293:1231191-1235612W, translated using codon table 1 (1418 amino acids) Uncharacterized ORF; Has domain(s) with predicted nucleoside-triphosphatase activity, nucleotide binding, pre-mRNA intronic binding activity, role in mRNA splicing, via spliceosome and spliceosomal complex localization	29.8006	10.72	1	11	11	11	1418	161.396	6.31592
Afu5g08190	Afu3g10730	Afu3g10730 AspGDID:ASPL0000105471 COORDS:Chr3_A_fumigatus_Af293:2781133-2780135C, translated using codon table 1 (201 amino acids) Uncharacterized ORF; 40S ribosomal protein S7e	29.7675	48.26	1	6	6	6	201	22.8304	10.1548
Afu3g06140	Afu6g13490	Afu6g13490 AspGDID:ASPL0000109690 COORDS:Chr6_A_fumigatus_Af293:3433612-3431912C, translated using codon table 1 (515 amino acids) Uncharacterized ORF; Putative glutamate decarboxylase; predicted gene pair with AFUA_8G06020; SrbA-regulated during hypoxia	29.6882	14.37	1	6	6	8	515	58.8806	6.23975
Afu1g06820	Afu6g13120	Afu6g13120 AspGDID:ASPL0000109654 COORDS:Chr6_A_fumigatus_Af293:3319421-3313341C, translated using codon table 1 (2009 amino acids) Uncharacterized ORF; Ortholog(s) have ribonucleoprotein complex binding activity	29.4574	6.02	1	10	10	10	2009	224.189	5.41455
Afu2g02150	Afu4g07580	Afu4g07580 AspGDID:ASPL0000106473 COORDS:Chr4_A_fumigatus_Af293:1969969-1971642W, translated using codon table 1 (516 amino acids) Uncharacterized ORF; Translation initiation factor EF-2 gamma subunit	29.4466	21.32	1	7	7	7	516	56.1044	7.09326
Afu5g12890	Afu2g13295	Afu2g13295 AspGDID:ASPL0000362536 COORDS:Chr2_A_fumigatus_Af293:3433790-3435299W, translated using codon table 1 (453 amino acids) Uncharacterized ORF; Ortholog(s) have cytosol, nucleus localization	29.3734	27.81	1	8	8	8	453	49.7017	6.80029
Afu1g12730	Afu1g05340	Afu1g05340 AspGDID:ASPL0000101702 COORDS:Chr1_A_fumigatus_Af293:1537487-1538453W, translated using codon table 1 (221 amino acids) Uncharacterized ORF; 40S ribosomal protein S19	29.1879	24.89	1	6	6	10	221	24.8199	9.53955
Afu2g11560	Afu1g05390	Afu1g05390 AspGDID:ASPL0000101707 COORDS:Chr1_A_fumigatus_Af293:1549201-1548016C, translated using codon table 1 (308 amino acids) Uncharacterized ORF; Ortholog(s) have ATP:ADP antiporter activity	29.064	18.18	1	6	6	7	308	33.3004	9.96436
Afu1g05130	Afu3g07830	Afu3g07830 AspGDID:ASPL0000105187 COORDS:Chr3_A_fumigatus_Af293:1972897-1974834W, translated using codon table 1 (535 amino acids) Uncharacterized ORF; Ortholog(s) have unfolded protein binding activity, role in protein folding and chaperonin-containing T-complex, nucleus localization	29.0395	17.2	1	6	6	8	535	57.5166	8.36768
Afu6g12360	Afu1g04320	Afu1g04320 AspGDID:ASPL0000101600 COORDS:Chr1_A_fumigatus_Af293:1226288-1226942W, translated using codon table 1 (201 amino acids) Uncharacterized ORF; Ribosomal protein S8	28.9215	35.32	1	5	5	7	201	22.7982	11.1802
Afu6g11160	Afu2g05250	rfeD AspGDID:ASPL0000103349 COORDS:Chr2_A_fumigatus_Af293:1460163-1458288C, translated using codon table 1 (508 amino acids) Uncharacterized ORF; Putative transcription factor; transcript up-regulated in conidia exposed to neutrophils	28.7659	22.83	1	8	8	8	508	55.8867	9.23193
Afu2g13290	Afu6g07390	lysB AspGDID:ASPL0000109101 COORDS:Chr6_A_fumigatus_Af293:1667162-1668427W, translated using codon table 1 (358 amino acids) Verified ORF; Putative homoisocitrate dehydrogenase with a role in lysine metabolism; hypoxia induced protein	28.6551	32.68	1	9	9	9	358	38.0701	6.21436
Afu3g06190	Afu5g07370	Afu5g07370 AspGDID:ASPL0000107811 COORDS:Chr5_A_fumigatus_Af293:1844081-1842511C, translated using codon table 1 (500 amino acids) Uncharacterized ORF; Ortholog(s) have metal ion binding, poly(A)-specific ribonuclease activity	28.4401	18.4	1	6	6	7	500	53.7507	7.07861
Afu6g02140	Afu1g03970	Afu1g03970 AspGDID:ASPL0000101567 COORDS:Chr1_A_fumigatus_Af293:1147911-1144571C, translated using codon table 1 (1068 amino acids) Verified ORF; Putative mitochondrial translation initiation factor IF-2	28.0978	10.49	1	7	7	7	1068	118.635	6.13818
Afu5g10920	Afu1g04660	Afu1g04660 AspGDID:ASPL0000101635 COORDS:Chr1_A_fumigatus_Af293:1318902-1317870C, translated using codon table 1 (203 amino acids) Uncharacterized ORF; Ribosomal protein L15	28.0512	33.5	1	7	7	10	203	24.169	11.2974
Afu4g10470	Afu5g13510	Afu5g13510 AspGDID:ASPL0000108404 COORDS:Chr5_A_fumigatus_Af293:3546669-3545011C, translated using codon table 1 (476 amino acids) Uncharacterized ORF; Ortholog(s) have Prp19 complex, cytosol, nuclear envelope localization	28.0365	24.16	1	5	5	5	476	50.1476	5.19873
Afu4g01580	Afu1g08840	Afu1g08840 AspGDID:ASPL0000101950 COORDS:Chr1_A_fumigatus_Af293:2290909-2291935W, translated using codon table 1 (228 amino acids) Uncharacterized ORF; Ortholog(s) have guanylate kinase activity, role in GMP metabolic process and cytoplasm, nucleus localization	27.9041	44.3	1	8	8	9	228	25.5231	7.43018
Afu1g05310	Afu2g03380	Afu2g03380 AspGDID:ASPL0000103167 COORDS:Chr2_A_fumigatus_Af293:892615-891880C, translated using codon table 1 (127 amino acids) Uncharacterized ORF; Ortholog(s) have cytosol, mitochondrion, nucleus localization	27.8402	40.94	1	5	5	7	127	13.429	9.67139
Afu3g08290	Afu3g05450	Afu3g05450 AspGDID:ASPL0000104961 COORDS:Chr3_A_fumigatus_Af293:1314948-1313258C, translated using codon table 1 (478 amino acids) Uncharacterized ORF; Putative glutamate carboxypeptidase	27.7387	15.69	1	5	5	6	478	52.9817	5.71924
Afu2g16310	Afu5g11320	aspf29 AspGDID:ASPL0000108191 COORDS:Chr5_A_fumigatus_Af293:2903022-2902611C, translated using codon table 1 (110 amino acids) Verified ORF; Allergen Asp f 29; putative thioredoxin	27.6028	61.82	1	5	5	6	110	11.968	5.22412
	Afu7g01800	Afu7g01800 AspGDID:ASPL0000109975 COORDS:Chr7_A_fumigatus_Af293:477654-480419W, translated using codon table 1 (921 amino acids) Uncharacterized ORF; Has domain(s) with predicted DNA binding activity	27.5687	12.81	1	5	5	6	921	99.9897	10.3306
	Afu4g13690	Afu4g13690 AspGDID:ASPL0000107075 COORDS:Chr4_A_fumigatus_Af293:3585762-3584862C, translated using codon table 1 (202 amino acids) Uncharacterized ORF; Has domain(s) with predicted pseudouridine synthase activity, snoRNA binding activity, role in pseudouridine synthesis, ribosome biogenesis, snRNA pseudouridine synthesis and box H/ACA snoRNP complex localization	27.5352	21.78	1	2	2	4	202	20.3925	11.2388
	Afu4g07740	Afu4g07740 AspGDID:ASPL0000106489 COORDS:Chr4_A_fumigatus_Af293:2023797-2025143W, translated using codon table 1 (357 amino acids) Uncharacterized ORF; Ortholog of <i>Aspergillus fumigatus A1163</i> : AFUB_064840 and <i>Aspergillus niger ATCC 1015</i> : 44190-mRNA	27.5157	17.09	1	5	5	6	357	37.0461	10.3599
	Afu5g02720	Afu5g02720 AspGDID:ASPL0000107452 COORDS:Chr5_A_fumigatus_Af293:710324-714412W, translated using codon table 1 (1362 amino acids) Uncharacterized ORF; Ortholog(s) have phosphoribosylformylglycinamidine synthase activity, role in purine nucleotide biosynthetic process and Golgi apparatus localization	27.2628	6.61	1	5	5	6	1362	147.52	6.12549
	Afu6g08660	Afu6g08660 AspGDID:ASPL0000109222 COORDS:Chr6_A_fumigatus_Af293:2052348-2048629C, translated using codon table 1 (1239 amino acids) Uncharacterized ORF; Ortholog of <i>A. nidulans</i> AN3906; hypoxia repressed protein	27.1859	8.64	1	7	7	7	1239	131.817	5.09717
	Afu1g07540	Afu1g07540 AspGDID:ASPL0000101919 COORDS:Chr1_A_fumigatus_Af293:2122943-2124145W, translated using codon table 1 (350 amino acids) Uncharacterized ORF; Ortholog(s) have role in cellular response to drug and nuclear envelope, proteasome regulatory particle, lid subcomplex, proteasome storage granule localization	27.1644	30	1	5	5	5	350	38.9712	6.01123
	Afu5g03080	aspC AspGDID:ASPL0000107487 COORDS:Chr5_A_fumigatus_Af293:834771-833226C, translated using codon table 1 (384 amino acids) Uncharacterized ORF; Putative septin; hypoxia repressed protein; repressed by exposure to artemisinin	27.1622	24.48	1	6	7	7	384	44.387	8.73389
	Afu5g03290	Afu5g03290 AspGDID:ASPL0000107508 COORDS:Chr5_A_fumigatus_Af293:891751-889972C, translated using codon table 1 (566 amino acids) Uncharacterized ORF; Ortholog of <i>A. nidulans FGSC A4</i> : AN8197, <i>A. niger CBS 513.88</i> : An09g05540, <i>A. oryzae RIB40</i> : AO090102000532, <i>Aspergillus wentii</i> : Aspwe1_0115831 and <i>Aspergillus sydowii</i> : Aspsy1_0211779	27.1612	15.72	1	5	5	6	566	62.6301	9.89111
	Afu6g02630	Afu6g02630 AspGDID:ASPL0000108718 COORDS:Chr6_A_fumigatus_Af293:512097-510055C, translated using codon table 1 (441 amino acids) Uncharacterized ORF; Ortholog(s) have ATP-dependent RNA helicase activity	27.0329	21.09	1	7	7	8	441	49.5704	5.8208
	Afu7g03910	Afu7g03910 AspGDID:ASPL0000110086 COORDS:Chr7_A_fumigatus_Af293:878642-880573W, translated using codon table 1 (643 amino acids) Uncharacterized ORF; Ortholog(s) have role in conidium formation, negative regulation of conidium formation and positive regulation of sexual sporulation resulting in formation of a cellular spore, <a href="#GOsection">more</a>	26.9868	12.29	1	5	5	8	643	67.6066	7.60596
	Afu8g04410	Afu8g04410 AspGDID:ASPL0000110776 COORDS:Chr8_A_fumigatus_Af293:991594-993920W, translated using codon table 1 (710 amino acids) Uncharacterized ORF; Ortholog of <i>A. nidulans FGSC A4</i> : AN1453, <i>A. niger CBS 513.88</i> : An16g08630, <i>Aspergillus wentii</i> : Aspwe1_0117354, <i>Aspergillus sydowii</i> : Aspsy1_0143599 and <i>Aspergillus terreus NIH2624</i> : ATET_00054	26.8318	16.06	1	7	7	7	710	77.9938	5.60498
	Afu6g11260	Afu6g11260 AspGDID:ASPL0000109476 COORDS:Chr6_A_fumigatus_Af293:2786302-2787411W, translated using codon table 1 (266 amino acids) Uncharacterized ORF; Ribosomal protein L26; transcript induced by exposure to human airway epithelial cells	26.6937	19.17	1	7	7	9	266	29.5987	10.9751
	Afu6g13550	Afu6g13550 AspGDID:ASPL0000109696 COORDS:Chr6_A_fumigatus_Af293:3450087-3449278C, translated using codon table 1 (155 amino acids) Uncharacterized ORF; Ribosomal protein S13p/S18e	26.685	45.81	1	9	9	9	155	17.8567	10.4478
	Afu1g04940	Afu1g04940 AspGDID:ASPL0000101663 COORDS:Chr1_A_fumigatus_Af293:1408563-1409639W, translated using codon table 1 (189 amino acids) Uncharacterized ORF; Ortholog(s) have GTP binding, GTPase activity	26.6348	50.26	1	7	7	8	189	21.4181	6.41748
	Afu2g04670	Afu2g04670 AspGDID:ASPL0000103293 COORDS:Chr2_A_fumigatus_Af293:1271655-1269395C, translated using codon table 1 (603 amino acids) Uncharacterized ORF; Ortholog(s) have role in ascospore-type prospore assembly, protein targeting to vacuole involved in ubiquitin-dependent protein catabolic process via the multivesicular body sorting pathway	26.6294	13.93	1	7	7	8	603	66.7521	6.1001
	Afu4g03050	pfy1 AspGDID:ASPL0000106123 COORDS:Chr4_A_fumigatus_Af293:854319-853521C, translated using codon table 1 (131 amino acids) Uncharacterized ORF; Profilin	26.5806	58.02	1	3	3	5	131	13.9389	5.47803
	Afu1g09800	Afu1g09800 AspGDID:ASPL0000102046 COORDS:Chr1_A_fumigatus_Af293:2543871-2545480W, translated using codon table 1 (394 amino acids) Uncharacterized ORF; Ortholog of S. cerevisiae OLA1; snoRNA Afu-304 encoded within intron 2	26.3865	27.92	1	8	8	8	394	43.452	7.81104
	Afu1g07530	Afu1g07530 AspGDID:ASPL0000101918 COORDS:Chr1_A_fumigatus_Af293:2122230-2121254C, translated using codon table 1 (257 amino acids) Uncharacterized ORF; Ortholog(s) have adenylate kinase activity, role in ADP biosynthetic process, DNA replication initiation and cytosol, mitochondrial intermembrane space, mitochondrial outer membrane, nucleus localization	26.3216	31.91	1	6	6	7	257	28.6848	7.88428
	Afu2g10420	Afu2g10420 AspGDID:ASPL0000103757 COORDS:Chr2_A_fumigatus_Af293:2667447-2668759W, translated using codon table 1 (397 amino acids) Uncharacterized ORF; Has domain(s) with predicted branched-chain-amino-acid transaminase activity, catalytic activity and role in branched-chain amino acid metabolic process, metabolic process	26.2654	22.67	1	6	6	7	397	43.9797	6.55127
	Afu2g11150	Afu2g11150 AspGDID:ASPL0000103830 COORDS:Chr2_A_fumigatus_Af293:2856083-2857872W, translated using codon table 1 (468 amino acids) Uncharacterized ORF; Putative secretory-pathway GDP dissociation inhibitor; transcript and protein levels increase upon exposure to amphotericin B	26.2576	20.94	1	7	7	9	468	52.2473	5.50342
	Afu4g13700	Afu4g13700 AspGDID:ASPL0000107076 COORDS:Chr4_A_fumigatus_Af293:3586027-3588483W, translated using codon table 1 (737 amino acids) Uncharacterized ORF; Ortholog(s) have cytosol localization	26.2222	14.38	1	8	8	8	737	84.4129	7.09326
	Afu1g14120	bfr1 AspGDID:ASPL0000102480 COORDS:Chr1_A_fumigatus_Af293:3774407-3776224W, translated using codon table 1 (510 amino acids) Uncharacterized ORF; Putative nuclear segregation protein	26.1742	14.31	1	6	6	8	510	57.388	9.12939
	Afu3g05600	Afu3g05600 AspGDID:ASPL0000104976 COORDS:Chr3_A_fumigatus_Af293:1361310-1362104W, translated using codon table 1 (149 amino acids) Uncharacterized ORF; 60S ribosomal protein L27a	26.1029	34.23	1	5	5	7	149	16.751	10.4331
	Afu5g06390	Afu5g06390 AspGDID:ASPL0000107715 COORDS:Chr5_A_fumigatus_Af293:1536841-1538186W, translated using codon table 1 (338 amino acids) Uncharacterized ORF; Putative adenosine kinase	26.0882	19.23	1	4	4	6	338	36.8353	5.17334
	Afu1g09770	Afu1g09770 AspGDID:ASPL0000102043 COORDS:Chr1_A_fumigatus_Af293:2532708-2535258W, translated using codon table 1 (786 amino acids) Uncharacterized ORF; Ortholog of <i>A. nidulans FGSC A4</i> : AN1288, <i>A. niger CBS 513.88</i> : An08g01580, <i>A. oryzae RIB40</i> : AO090012000866, <i>Aspergillus wentii</i> : Aspwe1_0036503 and <i>Aspergillus sydowii</i> : Aspsy1_0025457	26.0014	12.6	1	7	7	7	786	83.6754	9.45166
	Afu5g02160	Afu5g02160 AspGDID:ASPL0000107396 COORDS:Chr5_A_fumigatus_Af293:552208-549993C, translated using codon table 1 (613 amino acids) Uncharacterized ORF; Ortholog(s) have nucleolus localization	25.968	13.87	1	5	5	5	613	65.768	7.34229
	Afu1g12120	Afu1g12120 AspGDID:ASPL0000102278 COORDS:Chr1_A_fumigatus_Af293:3205498-3207930W, translated using codon table 1 (789 amino acids) Uncharacterized ORF; Ortholog of <i>A. niger CBS 513.88</i> : An08g04420, <i>A. oryzae RIB40</i> : AO090001000333, <i>Aspergillus wentii</i> : Aspwe1_0027928, <i>Aspergillus sydowii</i> : Aspsy1_0038224 and <i>Aspergillus terreus NIH2624</i> : ATET_00411	25.9333	11.28	1	7	7	7	789	95.9883	10.5356
	Afu3g01110	gua1 AspGDID:ASPL0000104631 COORDS:Chr3_A_fumigatus_Af293:261096-258836C, translated using codon table 1 (539 amino acids) Uncharacterized ORF; Putative GMP synthase ([glutamine-hydrolyzing); Yap1-dependent induction in response to hydrogen peroxide	25.8696	15.4	1	6	6	7	539	59.4337	6.26514
	Afu2g15840	Afu2g15840 AspGDID:ASPL0000104301 COORDS:Chr2_A_fumigatus_Af293:4185756-4183151C, translated using codon table 1 (804 amino acids) Uncharacterized ORF; Ortholog of <i>A. nidulans FGSC A4</i> : AN9067/tinC, AN2167/hetC, <i>A. fumigatus Af293</i> : Afu7g02570, <i>A. niger CBS 513.88</i> : An15g06140 and <i>A. oryzae RIB40</i> : AO090038000633, AO090012000230	25.8243	11.82	1	7	7	8	804	88.6335	6.81494
	Afu5g02450	erg20 AspGDID:ASPL0000107425 COORDS:Chr5_A_fumigatus_Af293:631975-633093W, translated using codon table 1 (347 amino acids) Uncharacterized ORF; Putative polyprenyl synthetase; farnesyl-pyrophosphate synthetase; SrbA-regulated during hypoxia	25.6881	23.05	1	7	7	7	347	39.7375	5.50342
	Afu6g12220	Afu6g12220 AspGDID:ASPL0000109567 COORDS:Chr6_A_fumigatus_Af293:3072444-3071777C, translated using codon table 1 (194 amino acids) Uncharacterized ORF; Has domain(s) with predicted catalytic activity and role in metabolic process	25.344	48.45	1	4	4	4	194	20.8915	6.41748
	Afu2g01010	Afu2g01010 AspGDID:ASPL0000102932 COORDS:Chr2_A_fumigatus_Af293:234729-236432W, translated using codon table 1 (534 amino acids) Uncharacterized ORF; Putative myo-inositol-phosphate synthase; transcript up-regulated in conidia exposed to neutrophils	25.2995	14.61	1	6	6	8	534	58.6346	6.22705
	Afu2g11940	ade13 AspGDID:ASPL0000103908 COORDS:Chr2_A_fumigatus_Af293:3080820-3078848C, translated using codon table 1 (483 amino acids) Uncharacterized ORF; Adenylosuccinate lyase; reacts with rabbit immunosera exposed to A. fumigatus conidia	25.2895	19.67	1	8	8	8	483	54.6911	6.55127
	Afu2g14260	Afu2g14260 AspGDID:ASPL0000104141 COORDS:Chr2_A_fumigatus_Af293:3734617-3737950W, translated using codon table 1 (1011 amino acids) Uncharacterized ORF; Ortholog of <i>A. nidulans FGSC A4</i> : AN6342, <i>A. niger CBS 513.88</i> : An02g01220, <i>A. oryzae RIB40</i> : AO090023000107, <i>Aspergillus wentii</i> : Aspwe1_0045565 and <i>Aspergillus sydowii</i> : Aspsy1_0031691	25.2311	6.23	1	5	5	8	1011	112.754	8.07471
	Afu3g11740	Afu3g11740 AspGDID:ASPL0000105570 COORDS:Chr3_A_fumigatus_Af293:3081634-3084443W, translated using codon table 1 (905 amino acids) Uncharacterized ORF; Ortholog(s) have role in anisotropic cell growth and cytoplasm, nucleus localization	25.1943	10.83	1	6	6	6	905	94.0716	6.81494
	Afu8g03880	Afu8g03880 AspGDID:ASPL0000110724 COORDS:Chr8_A_fumigatus_Af293:825050-828378W, translated using codon table 1 (1011 amino acids) Uncharacterized ORF; Putative alanyl-tRNA synthetase; protein induced by hydrogen peroxide	25.1168	9.79	1	7	7	7	1011	113.644	6.48096
	Afu4g10200	rfeF AspGDID:ASPL0000106734 COORDS:Chr4_A_fumigatus_Af293:2660389-2663660W, translated using codon table 1 (706 amino acids) Uncharacterized ORF; Putative transcription factor; calcium induced	25.0881	11.47	1	5	5	6	706	75.0871	5.03369
	Afu3g08470	Afu3g08470 AspGDID:ASPL0000105250 COORDS:Chr3_A_fumigatus_Af293:2171618-2174019W, translated using codon table 1 (511 amino acids) Verified ORF; Glucose-6-phosphate 1-dehydrogenase	25.063	20.16	1	9	9	9	511	58.8991	7.00537
	Afu7g05290	Afu7g05290 AspGDID:ASPL0000110222 COORDS:Chr7_A_fumigatus_Af293:1257190-1256242C, translated using codon table 1 (151 amino acids) Uncharacterized ORF; Cytosolic small ribosomal subunit S13/S15; transcript repressed by exposure to human airway epithelial cells	25.0272	31.13	1	5	5	7	151	16.8353	10.4331
	Afu4g08710	Afu4g08710 AspGDID:ASPL0000106586 COORDS:Chr4_A_fumigatus_Af293:2256334-2255247C, translated using codon table 1 (287 amino acids) Uncharacterized ORF; Putative short chain dehydrogenase; transcriptionally up-regulated in conidia exposed to neutrophils; induced by gliotoxin exposure	25.0126	32.75	1	7	7	7	287	30.9087	5.38916
	Afu2g04700	Afu2g04700 AspGDID:ASPL0000103296 COORDS:Chr2_A_fumigatus_Af293:1283529-1287638W, translated using codon table 1 (1310 amino acids) Uncharacterized ORF; Ortholog(s) have role in cellular response to heat and cytosol, endoplasmic reticulum, nuclear outer membrane-endoplasmic reticulum membrane network localization	24.9876	4.96	1	5	5	7	1310	142.343	7.1958
	Afu8g05580	coaT AspGDID:ASPL0000110887 COORDS:Chr8_A_fumigatus_Af293:1308874-1310609W, translated using codon table 1 (525 amino acids) Uncharacterized ORF; Putative coenzyme A transferase; transcript induced by exposure to human airway epithelial cells	24.8641	13.71	1	4	4	5	525	58.1086	6.771
	Afu6g05150	Afu6g05150 AspGDID:ASPL0000108970 COORDS:Chr6_A_fumigatus_Af293:1231600-1234035W, translated using codon table 1 (588 amino acids) Uncharacterized ORF; Ortholog(s) have histone binding, transcription corepressor activity	24.8191	17.69	1	7	7	7	588	63.9718	6.90283
	Afu4g08480	Afu4g08480 AspGDID:ASPL0000106562 COORDS:Chr4_A_fumigatus_Af293:2190795-2194480W, translated using codon table 1 (1140 amino acids) Uncharacterized ORF; Ortholog(s) have cytosol, nucleus localization	24.6867	8.16	1	9	9	9	1140	124.656	5.14795
	Afu2g05650	Afu2g05650 AspGDID:ASPL0000103388 COORDS:Chr2_A_fumigatus_Af293:1582005-1580139C, translated using codon table 1 (604 amino acids) Uncharacterized ORF; Ortholog(s) have asparagine-tRNA ligase activity, role in asparaginyl-tRNA aminoacylation and cytosol localization	24.6514	16.06	1	6	6	6	604	68.2394	6.13818
	Afu5g05490	Afu5g05490 AspGDID:ASPL0000107628 COORDS:Chr5_A_fumigatus_Af293:1274938-1276745W, translated using codon table 1 (474 amino acids) Uncharacterized ORF; Ortholog(s) have cytosol localization	24.6344	24.05	1	8	8	8	474	54.1563	6.43018
	Afu1g12070	Afu1g12070 AspGDID:ASPL0000102273 COORDS:Chr1_A_fumigatus_Af293:3197608-3198304W, translated using codon table 1 (175 amino acids) Uncharacterized ORF; Ortholog(s) have glycine dehydrogenase (decarboxylating) activity, role in glycine catabolic process, one-carbon metabolic process, protein lipoylation and mitochondrion localization	24.523	32	1	4	4	6	175	18.6155	4.85596
	Afu2g07970	Afu2g07970 AspGDID:ASPL0000103517 COORDS:Chr2_A_fumigatus_Af293:2047985-2048981W, translated using codon table 1 (191 amino acids) Uncharacterized ORF; 60S ribosomal protein L19	24.433	29.84	1	6	6	7	191	22.5655	11.561
	Afu1g14570	Afu1g14570 AspGDID:ASPL0000102524 COORDS:Chr1_A_fumigatus_Af293:3892553-3895217W, translated using codon table 1 (872 amino acids) Uncharacterized ORF; Putative phosphoribosyl-AMP cyclohydrolase; no human homolog	24.3783	11.58	1	7	7	7	872	92.8238	5.65576
	Afu1g09060	Afu1g09060 AspGDID:ASPL0000101972 COORDS:Chr1_A_fumigatus_Af293:2350956-2349169C, translated using codon table 1 (512 amino acids) Uncharacterized ORF; Ortholog(s) have Rpd3L-Expanded complex, Rpd3S complex localization	24.3352	22.85	1	8	8	8	512	56.7913	4.80518
	Afu2g02050	cyp7 AspGDID:ASPL0000103035 COORDS:Chr2_A_fumigatus_Af293:509986-508618C, translated using codon table 1 (373 amino acids) Uncharacterized ORF; Putative peptidyl-prolyl cis-trans isomerase	24.2366	19.3	1	6	6	7	373	41.3168	5.98584
	Afu7g05470	Afu7g05470 AspGDID:ASPL0000110240 COORDS:Chr7_A_fumigatus_Af293:1320985-1322187W, translated using codon table 1 (352 amino acids) Uncharacterized ORF; Putative electron transfer flavoprotein alpha subunit; transcript induced by exposure to human airway epithelial cells; induced by exposure to artemisinin	24.1542	28.41	1	6	6	6	352	36.6673	6.27783
	Afu4g09740	Afu4g09740 AspGDID:ASPL0000106688 COORDS:Chr4_A_fumigatus_Af293:2536684-2538622W, translated using codon table 1 (567 amino acids) Uncharacterized ORF; Ortholog(s) have unfolded protein binding activity	24.0628	15.87	1	7	7	8	567	61.363	5.2876
	Afu2g07680	sidA AspGDID:ASPL0000103489 COORDS:Chr2_A_fumigatus_Af293:1961124-1959561C, translated using codon table 1 (501 amino acids) Verified ORF; L-ornithine N5-oxygenase; first committed step in siderophore biosynthesis; essential for virulence; induced by exposure to human airway epithelial cells; expression up-regulated by iron starvation; activated by L-arginine; SrbA-regulated	24.0613	21.76	1	8	8	8	501	56.841	8.6167
	Afu3g09590	Afu3g09590 AspGDID:ASPL0000105357 COORDS:Chr3_A_fumigatus_Af293:2440296-2438341C, translated using codon table 1 (540 amino acids) Uncharacterized ORF; Ortholog(s) have role in cellular response to drug and chaperonin-containing T-complex, nucleus localization	24.0184	15.19	1	5	5	6	540	58.7327	6.75635
	Afu3g06960	Afu3g06960 AspGDID:ASPL0000105107 COORDS:Chr3_A_fumigatus_Af293:1742922-1742198C, translated using codon table 1 (158 amino acids) Uncharacterized ORF; 60S ribosomal protein L21	23.9712	34.81	1	5	5	6	158	17.9697	10.228
	Afu2g03830	aspf4 AspGDID:ASPL0000103209 COORDS:Chr2_A_fumigatus_Af293:1016683-1017651W, translated using codon table 1 (322 amino acids) Verified ORF; Allergen Asp f 4; higher expression in biofilm vs planktonic cells; transcript induced by growth on hydrogen peroxide	23.9204	29.5	1	5	5	5	322	34.0634	5.35107
	Afu4g00610	Afu4g00610 AspGDID:ASPL0000105980 COORDS:Chr4_A_fumigatus_Af293:166314-168179W, translated using codon table 1 (601 amino acids) Uncharacterized ORF; Putative aryl-alcohol dehydrogenase	23.8254	12.98	1	4	4	5	601	65.2895	5.51611
	Afu3g04170	Afu3g04170 AspGDID:ASPL0000104933 COORDS:Chr3_A_fumigatus_Af293:1175521-1176878W, translated using codon table 1 (377 amino acids) Uncharacterized ORF; Ortholog(s) have pyruvate dehydrogenase (acetyl-transferring) activity and role in acetyl-CoA biosynthetic process from pyruvate, arginine biosynthetic process, glutamine biosynthetic process	23.7553	16.98	1	5	5	6	377	40.5359	7.23975
	Afu2g04130	Afu2g04130 AspGDID:ASPL0000103239 COORDS:Chr2_A_fumigatus_Af293:1132624-1131702C, translated using codon table 1 (160 amino acids) Uncharacterized ORF; 40S ribosomal protein S11	23.7543	35.63	1	5	5	7	160	18.5551	10.8286
	Afu2g03030	prp8 AspGDID:ASPL0000103132 COORDS:Chr2_A_fumigatus_Af293:787177-777614C, translated using codon table 1 (3170 amino acids) Verified ORF; Putative pre-mRNA splicing factor; intein-containing protein, inteins are protein intervening sequences that can self-excise through protein splicing	23.4322	3.19	1	9	9	9	3170	364.449	8.06006
	Afu5g07780	erg1 AspGDID:ASPL0000107850 COORDS:Chr5_A_fumigatus_Af293:1942829-1944341W, translated using codon table 1 (481 amino acids) Verified ORF; Putative squalene monooxygenase; higher expression in 48 h biofilm vs planktonic cells; SrbA-regulated during hypoxia	23.3404	18.09	1	6	6	6	481	52.6486	8.67529
	Afu3g13030	Afu3g13030 AspGDID:ASPL0000105699 COORDS:Chr3_A_fumigatus_Af293:3459705-3461612W, translated using codon table 1 (540 amino acids) Uncharacterized ORF; Ortholog(s) have unfolded protein binding activity, role in cellular response to drug, protein folding and chaperonin-containing T-complex, nucleus localization	23.1277	17.78	1	8	8	8	540	59.3149	6.21436
	Afu3g08840	Afu3g08840 AspGDID:ASPL0000105285 COORDS:Chr3_A_fumigatus_Af293:2262208-2266262W, translated using codon table 1 (1212 amino acids) Uncharacterized ORF; Ortholog(s) have role in hyphal growth, nuclear division and Golgi apparatus, hyphal tip localization	23.0179	8.09	1	5	5	5	1212	135.784	6.27783
	Afu3g10070	Afu3g10070 AspGDID:ASPL0000105404 COORDS:Chr3_A_fumigatus_Af293:2592726-2594405W, translated using codon table 1 (542 amino acids) Uncharacterized ORF; Ortholog(s) have nucleus localization	22.8837	19.93	1	6	6	6	542	60.2089	7.86963
	Afu1g03510	Afu1g03510 AspGDID:ASPL0000101521 COORDS:Chr1_A_fumigatus_Af293:1014395-1015676W, translated using codon table 1 (297 amino acids) Uncharacterized ORF; ATP Synthase gamma chain, mitochondrial precursor	22.7979	16.16	1	4	4	6	297	32.3556	8.20654
	Afu5g05920	Afu5g05920 AspGDID:ASPL0000107669 COORDS:Chr5_A_fumigatus_Af293:1392015-1389862C, translated using codon table 1 (699 amino acids) Uncharacterized ORF; Putative glycyl-tRNA synthetase; protein induced by heat shock	22.7864	12.3	1	7	7	7	699	79.0498	6.46826
	Afu2g09200	Afu2g09200 AspGDID:ASPL0000103638 COORDS:Chr2_A_fumigatus_Af293:2358357-2358900W, translated using codon table 1 (106 amino acids) Uncharacterized ORF; 60S ribosomal protein L30	22.6704	39.62	1	3	3	5	106	11.294	9.83252
	Afu3g07790	Afu3g07790 AspGDID:ASPL0000105183 COORDS:Chr3_A_fumigatus_Af293:1963894-1965412W, translated using codon table 1 (464 amino acids) Uncharacterized ORF; Argininosuccinate lyase; hypoxia induced protein	22.6233	18.1	1	6	6	6	464	51.8196	6.27783
	Afu2g10500	Afu2g10500 AspGDID:ASPL0000103765 COORDS:Chr2_A_fumigatus_Af293:2687569-2686778C, translated using codon table 1 (143 amino acids) Uncharacterized ORF; 40S ribosomal protein Rps16	22.484	45.45	1	6	6	7	143	15.9616	10.1841
	Afu1g06770	Afu1g06770 AspGDID:ASPL0000101845 COORDS:Chr1_A_fumigatus_Af293:1933600-1932735C, translated using codon table 1 (119 amino acids) Uncharacterized ORF; 40S ribosomal protein S26	22.473	37.82	1	4	4	7	119	13.4602	10.8726
	Afu6g08820	Afu6g08820 AspGDID:ASPL0000109238 COORDS:Chr6_A_fumigatus_Af293:2089238-2095101W, translated using codon table 1 (1545 amino acids) Uncharacterized ORF; Has domain(s) with predicted nucleic acid binding, nucleotide binding, zinc ion binding activity	22.3162	5.89	1	6	6	6	1545	165.867	8.5874
	Afu5g07180	Afu5g07180 AspGDID:ASPL0000107793 COORDS:Chr5_A_fumigatus_Af293:1781990-1789479W, translated using codon table 1 (2473 amino acids) Uncharacterized ORF; Ortholog(s) have nucleus localization	22.3028	3.56	1	7	7	7	2473	274.127	8.17725
	Afu2g03010	cox5b AspGDID:ASPL0000103130 COORDS:Chr2_A_fumigatus_Af293:772718-771517C, translated using codon table 1 (191 amino acids) Uncharacterized ORF; Putative cytochrome C subunit Vb; hypoxia induced protein	22.285	48.69	1	5	5	5	191	21.5048	6.60986
	Afu3g11540	Afu3g11540 AspGDID:ASPL0000105552 COORDS:Chr3_A_fumigatus_Af293:3034245-3035231W, translated using codon table 1 (328 amino acids) Uncharacterized ORF; Ortholog of <i>A. nidulans FGSC A4</i> : AN2893/fhdA, <i>A. niger CBS 513.88</i> : An14g03210, <i>A. oryzae RIB40</i> : AO090003000711, <i>Neosartorya fischeri NRRL 181</i> : NFIA_065770 and <i>Aspergillus clavatus NRRL 1</i> : ACLA_039420	22.1738	21.65	1	6	6	6	328	38.0904	10.5796
	Afu3g06310	Afu3g06310 AspGDID:ASPL0000105042 COORDS:Chr3_A_fumigatus_Af293:1564974-1563861C, translated using codon table 1 (326 amino acids) Uncharacterized ORF; Has domain(s) with predicted nucleic acid binding, nucleotide binding activity	22.0418	21.17	1	5	5	5	326	37.8535	9.27588
	Afu2g13110	cycA AspGDID:ASPL0000104025 COORDS:Chr2_A_fumigatus_Af293:3368165-3367112C, translated using codon table 1 (235 amino acids) Verified ORF; Cytochrome c; transcript derepressed during iron starvation in hapX mutant; SrbA-regulated during hypoxia; loss of cycA results in increased levels of AoxA activity, delayed germination and reduced growth in normoxia and hypoxia	22.0337	14.47	1	3	3	5	235	26.2545	10.0376
	Afu4g10240	Afu4g10240 AspGDID:ASPL0000106738 COORDS:Chr4_A_fumigatus_Af293:2679454-2679977W, translated using codon table 1 (116 amino acids) Uncharacterized ORF; Ortholog(s) have mRNA binding activity and role in cellular response to nitrogen starvation, mRNA splicing, via spliceosome, negative regulation of G0 to G1 transition	21.9289	54.31	1	5	5	6	116	12.831	11.312
	Afu2g04470	Afu2g04470 AspGDID:ASPL0000103272 COORDS:Chr2_A_fumigatus_Af293:1231100-1232641W, translated using codon table 1 (489 amino acids) Uncharacterized ORF; Ortholog of <i>A. nidulans FGSC A4</i> : AN1871, <i>A. niger CBS 513.88</i> : An11g03160, <i>A. oryzae RIB40</i> : AO090003000240, <i>Aspergillus wentii</i> : Aspwe1_0177180 and <i>Aspergillus sydowii</i> : Aspsy1_0140729	21.8998	19.02	1	5	5	5	489	55.2436	9.64209
	Afu4g11510	srb1 AspGDID:ASPL0000106859 COORDS:Chr4_A_fumigatus_Af293:3032998-3031629C, translated using codon table 1 (364 amino acids) Verified ORF; GDP-mannose pyrophosphorylase, which catalyses the synthesis of GDP-mannose from GTP and mannose-1-phosphate in cell wall biosynthesis	21.7599	19.51	1	5	5	6	364	40.0991	7.48877
	Afu3g11710	Afu3g11710 AspGDID:ASPL0000105567 COORDS:Chr3_A_fumigatus_Af293:3077527-3075881C, translated using codon table 1 (374 amino acids) Uncharacterized ORF; Ortholog(s) have mRNA binding, saccharopine dehydrogenase (NAD+, L-lysine-forming) activity, role in lysine biosynthetic process via aminoadipic acid and cytoplasm localization	21.7325	22.46	1	5	5	5	374	41.1903	5.33838
	Afu8g03990	Afu8g03990 AspGDID:ASPL0000110734 COORDS:Chr8_A_fumigatus_Af293:855176-851942C, translated using codon table 1 (985 amino acids) Uncharacterized ORF; Ortholog(s) have U5 snRNP, cytosol, spliceosomal complex localization	21.6665	10.05	1	6	7	7	985	110.12	5.08447
	Afu1g15720	Afu1g15720 AspGDID:ASPL0000102635 COORDS:Chr1_A_fumigatus_Af293:4249956-4253073W, translated using codon table 1 (872 amino acids) Uncharacterized ORF; Ortholog(s) have role in cell division and nuclear membrane localization	21.6585	10.32	1	7	7	7	872	96.2482	4.76709
	Afu2g07380	Afu2g07380 AspGDID:ASPL0000103461 COORDS:Chr2_A_fumigatus_Af293:1879464-1878670C, translated using codon table 1 (184 amino acids) Uncharacterized ORF; Ribosomal protein L18	21.5811	32.07	1	5	5	6	184	20.8407	11.8101
	Afu3g07430	aspf27 AspGDID:ASPL0000105151 COORDS:Chr3_A_fumigatus_Af293:1867882-1867179C, translated using codon table 1 (163 amino acids) Verified ORF; Putative peptidyl-prolyl cis-trans isomerase; cyclophilin; allergen Asp f 27; protein abundant in conidia; Yap1-dependent induction in response to hydrogen peroxide; induced by L-tyrosine	21.3678	34.36	1	6	6	7	163	17.7299	7.97217
	Afu3g09770	Afu3g09770 AspGDID:ASPL0000105375 COORDS:Chr3_A_fumigatus_Af293:2501138-2504109W, translated using codon table 1 (922 amino acids) Uncharacterized ORF; Has domain(s) with predicted nucleic acid binding, nucleotide binding activity	21.3634	8.89	1	7	7	8	922	100.771	8.49951
	Afu6g04940	Afu6g04940 AspGDID:ASPL0000108948 COORDS:Chr6_A_fumigatus_Af293:1165667-1171182W, translated using codon table 1 (1800 amino acids) Uncharacterized ORF; Ortholog(s) have cytoskeletal protein binding, profilin binding activity	21.3524	4.5	1	6	6	6	1800	199.272	6.354
	Afu3g05430	Afu3g05430 AspGDID:ASPL0000104959 COORDS:Chr3_A_fumigatus_Af293:1307445-1305739C, translated using codon table 1 (507 amino acids) Uncharacterized ORF; Ortholog(s) have translation regulator activity, nucleic acid binding activity	21.3331	17.75	1	7	7	7	507	57.0894	8.82178
	Afu5g06500	Afu5g06500 AspGDID:ASPL0000107726 COORDS:Chr5_A_fumigatus_Af293:1587081-1588611W, translated using codon table 1 (447 amino acids) Uncharacterized ORF; Acyl-CoA dehydrogenase family protein with a predicted role in fatty acid beta oxidation; induced by exposure to artemisinin	21.2179	18.79	1	7	7	7	447	49.1848	8.90967
	Afu6g08720	Afu6g08720 AspGDID:ASPL0000109228 COORDS:Chr6_A_fumigatus_Af293:2067644-2066477C, translated using codon table 1 (342 amino acids) Uncharacterized ORF; Putative 5'-methylthioadenosine phosphorylase; transcript induced by exposure to human airway epithelial cells	21.014	13.16	1	3	3	5	342	37.582	7.38623
	Afu2g10380	Afu2g10380 AspGDID:ASPL0000103753 COORDS:Chr2_A_fumigatus_Af293:2657604-2656030C, translated using codon table 1 (476 amino acids) Uncharacterized ORF; Has domain(s) with predicted translation initiation factor activity and eukaryotic translation initiation factor 3 complex localization	20.9991	16.81	1	5	5	5	476	54.6692	5.33838
	Afu4g10460	hcsA AspGDID:ASPL0000106760 COORDS:Chr4_A_fumigatus_Af293:2741783-2743422W, translated using codon table 1 (463 amino acids) Verified ORF; Homocitrate synthase, essential enzyme of the alpha-aminoadipate pathway of lysine biosynthesis; transcript highly induced during conidial germination; protein induced by heat shock; SrbA-regulated during hypoxia; no human homolog	20.8345	17.93	1	7	7	7	463	50.5404	6.01123
[truncated: 343 more rows]

## Sheet: SakA GFP CR_30min
Accession	Accession	Description	Score	Coverage	# Proteins	# Unique Peptides	# Peptides	# PSMs	# AAs	MW [kDa]	calc. pI
[truncated: 874 more rows]

## Sheet: SakA GFP CR_60min
Accession	Accession	Description	Score	Coverage	# Proteins	# Unique Peptides	# Peptides	# PSMs	# AAs	MW [kDa]	calc. pI
[truncated: 711 more rows]
