# Supplementary material for: Aspergillus fumigatus High Osmolarity Glycerol Mitogen Activated Protein Kinases SakA and MpkC Physically Interact During Osmotic and Cell Wall Stresses
Source: Front Microbiol. 2019 May 7;10:918. doi: 10.3389/fmicb.2019.00918 (PMC6514138; doi:10.3389/fmicb.2019.00918)
Supplement: Supplementary file 9 [file Table_9.xls]

## Sheet: SakA
Supplementary Table S9 - Venn diagram for SakA::GFP and MpkC::GFP exposed to sorbitol
Accession	Description	Time (min)	Time (min)	Time (min)	MW [kDa]	calc. pI
Afu1g02190	rab11 Ras GTPase; hypoxia repressed protein			60	23.2808	5.68115
Afu1g02270	abp2 Putative ARS binding protein		30	60	85.2378	9.31982
Afu1g02940	Ortholog(s) have GTPase activator activity, role in mitotic spindle assembly checkpoint, negative regulation of septation initiation signaling and cytosol, mitotic spindle pole body, nucleus localization	10	30	60	49.6601	9.26123
Afu1g03100	Putative ATP synthase delta chain			60	17.6294	5.35107
Afu1g03610	Protein of unknown function; calcium downregulated			60	32.0804	7.43018
Afu1g04620	Putative zinc-containing alcohol dehydrogenase; reacts with rabbit immunosera exposed to A. fumigatus conidia; hypoxia induced protein; transcript up-regulated in conidia exposed to neutrophils; repressed by gliotoxin exposure			60	37.8294	6.63916
Afu1g04850	Ortholog(s) have ATP-dependent microtubule motor activity, plus-end-directed activity		30		11.0675	6.66846
Afu1g04900	Proliferating cell nuclear antigen (PCNA); conidia-enriched protein			60	28.3053	4.71631
Afu1g05620	Ortholog(s) have phenylalanine-tRNA ligase activity, role in cellular response to drug, phenylalanyl-tRNA aminoacylation and cytosol, nucleus, phenylalanine-tRNA ligase complex localization			60	67.8031	5.68115
Afu1g05660	Ortholog of <i>A. nidulans FGSC A4</i> : AN9533, <i>A. niger CBS 513.88</i> : An18g03350, <i>A. oryzae RIB40</i> : AO090009000370, <i>Aspergillus wentii</i> : Aspwe1_0169285 and <i>Aspergillus sydowii</i> : Aspsy1_0148827			60	21.0599	9.64209
Afu1g08840	Ortholog(s) have guanylate kinase activity, role in GMP metabolic process and cytoplasm, nucleus localization			60	25.5231	7.43018
Afu1g09010	Ortholog(s) have cytosol localization			60	72.8652	7.06396
Afu1g10012	Ortholog of <i>A. nidulans FGSC A4</i> : AN5649, AN1674, AN0384, AN1268, AN7262, <i>A. fumigatus Af293</i> : Afu1g01700, Afu2g17000, Afu4g08730, Afu4g13630 and <i>A. niger CBS 513.88</i> : An01g09380, An01g06520, An04g09080, An04g03600	10			211.956	5.36377
Afu1g10850	Ortholog(s) have protein tag activity	10			10.3931	5.03369
Afu1g11730	Ortholog(s) have GTPase activity, role in ER to Golgi vesicle-mediated transport, Golgi to plasma membrane transport, cellular response to drug, macroautophagy and Golgi apparatus, glyoxysome localization			60	20.9899	5.70654
Afu1g12940	sakA Putative mitogen-activated protein kinase (MAPK) with predicted roles in the osmotic and oxidative stress responses; involved in sensing nitrogen in the medium	10	30	60	41.9334	5.60498
Afu1g13490	Putative spermidine synthase; protein induced by hydrogen peroxide			60	33.4237	5.5415
Afu1g13710	Isoleucyl-tRNA synthetase, cytoplasmic			60	122.315	6.43018
Afu1g14570	Putative phosphoribosyl-AMP cyclohydrolase; no human homolog			60	92.8238	5.65576
Afu1g15460	Ortholog of <i>A. nidulans FGSC A4</i> : AN0892, <i>A. niger CBS 513.88</i> : An01g13900, <i>A. oryzae RIB40</i> : AO090005001665, <i>Aspergillus wentii</i> : Aspwe1_0027562 and <i>Aspergillus sydowii</i> : Aspsy1_0138433		30		95.2598	9.61279
Afu1g15620	helA Putative DEAD box RNA helicase; protein induced by heat shock		30		73.8855	9.86182
Afu1g15810	Ortholog(s) have role in ascospore formation, sporocarp development involved in sexual reproduction and nucleus localization			60	63.936	9.37842
Afu1g17350	Ortholog of <i>A. oryzae RIB40</i> : AO090020000692, <i>Neosartorya fischeri NRRL 181</i> : NFIA_008000, <i>Aspergillus fumigatus A1163</i> : AFUB_016720 and <i>Aspergillus clavatus NRRL 1</i> : ACLA_018150		30	60	80.0909	6.53662
Afu2g02320	Hsp70 chaperone			60	61.7457	5.14795
Afu2g02590	Aspartyl-tRNA synthetase			60	61.5887	6.32861
Afu2g02770	Ortholog of <i>A. nidulans FGSC A4</i> : AN4545, <i>A. oryzae RIB40</i> : AO090026000849, <i>Aspergillus wentii</i> : Aspwe1_0105973, <i>Aspergillus sydowii</i> : Aspsy1_0059271 and <i>Aspergillus terreus NIH2624</i> : ATET_09613	10	30	60	109.228	10.1841
Afu2g02770	Ortholog of <i>A. nidulans FGSC A4</i> : AN4545, <i>A. oryzae RIB40</i> : AO090026000849, <i>Aspergillus wentii</i> : Aspwe1_0105973, <i>Aspergillus sydowii</i> : Aspsy1_0059271 and <i>Aspergillus terreus NIH2624</i> : ATET_09613		30	60	109.228	10.1841
Afu2g03030	prp8 Putative pre-mRNA splicing factor; intein-containing protein, inteins are protein intervening sequences that can self-excise through protein splicing	10			364.449	8.06006
Afu2g03490	Putative calcium/calmodulin-dependent protein kinase; calcium induced; transcript induced by exposure to human airway epithelial cells	10		60	72.0815	6.87354
Afu2g03580	Ortholog(s) have phenylalanine-tRNA ligase activity, role in phenylalanyl-tRNA aminoacylation and cytosol, phenylalanine-tRNA ligase complex localization		30		58.509	7.44482
Afu2g03810	hosA Putative histone deacetylase	10	30	60	54.3098	6.13818
Afu2g04010	tpsB Putative trehalose-6-phosphate synthase; role in trehalose biosynthesis; expression up during heat shock; hypervirulent in combination with tpsA mutation, in a mouse model of pulmonary infection; predicted gene pair with AFUA_6G12950		30		53.7666	7.43018
Afu2g04310	Argininosuccinate synthase; hypoxia induced protein			60	46.1043	5.47803
Afu2g04820	Putative translation release factor eRF3; transcript induced by exposure to human airway epithelial cells	10		60	77.2757	8.04541
Afu2g06150	pdiA Putative protein disulfide isomerase; conidial surface associated			60	56.152	4.70361
Afu2g07620	Cystathionine beta-synthase; transcript induced by exposure to human airway epithelial cells			60	57.7783	6.97607
Afu2g07730	Has domain(s) with predicted phospholipid binding activity, role in cortical protein anchoring and cell cortex localization	10	30	60	137.898	9.02686
Afu2g07960	Ortholog(s) have role in regulation of translational elongation and cytosolic ribosome, extracellular region, mitochondrion localization		30		291.954	5.85889
Afu2g10100	aspf8 Allergen Asp f 8; putative ribosomal protein P2; transcript induced by growth on hydrogen peroxide and menadione			60	11.1346	4.33545
Afu2g10420	Has domain(s) with predicted branched-chain-amino-acid transaminase activity, catalytic activity and role in branched-chain amino acid metabolic process, metabolic process			60	43.9797	6.55127
Afu2g11510	Ortholog(s) have role in cellular response to drug, rRNA processing, ribosomal large subunit biogenesis, ribosomal subunit export from nucleus and nucleolus, preribosome, large subunit precursor, spindle localization	10			73.251	8.86572
Afu2g11940	ade13 Adenylosuccinate lyase; reacts with rabbit immunosera exposed to A. fumigatus conidia			60	54.6911	6.55127
Afu2g12230	Ortholog(s) have structural constituent of ribosome activity and mitochondrial large ribosomal subunit localization		30		25.4293	10.4478
Afu2g13860	Histone H4			60	15.7624	10.2134
Afu2g14010	Ortholog of <i>A. nidulans FGSC A4</i> : AN6370, <i>A. oryzae RIB40</i> : AO090026000159, <i>Aspergillus wentii</i> : Aspwe1_0696714, <i>Aspergillus sydowii</i> : Aspsy1_0031745 and <i>Aspergillus terreus NIH2624</i> : ATET_01392			60	72.3026	9.43701
Afu3g06550	Has domain(s) with predicted phosphatase activity, phosphoserine phosphatase activity and role in L-serine biosynthetic process, metabolic process	10	30	60	51.8419	5.89697
Afu3g06640	Ortholog(s) have structural constituent of ribosome activity	10			8.86157	9.26123
Afu3g07820	Ortholog(s) have role in positive regulation of RNA polymerase II transcriptional preinitiation complex assembly, positive regulation of protein catabolic process and proteasome regulatory particle assembly, <a href="#GOsection">more</a>			60	48.8533	7.66455
Afu3g08120	Has domain(s) with predicted role in mRNA processing	10			56.7447	11.6196
Afu3g08460	60S ribosomal protein L35Ae			60	12.3376	11.2241
Afu3g08640	Ortholog(s) have sequence-specific DNA binding activity and role in cellular response to drug, cellular response to osmotic stress, translational initiation			60	37.6889	6.69775
Afu3g08940	Ortholog(s) have role in ubiquitin-dependent protein catabolic process and nucleus, proteasome regulatory particle, lid subcomplex, proteasome storage granule localization			60	31.1431	4.99561
Afu3g09090	Ortholog(s) have mitochondrion, nucleus localization	10			43.3361	9.01221
Afu3g09370	Ortholog(s) have role in establishment of cell polarity, establishment of nucleus localization, microtubule nucleation by spindle pole body, mitotic sister chromatid segregation	10	30		146.999	6.81494
Afu3g09590	Ortholog(s) have role in cellular response to drug and chaperonin-containing T-complex, nucleus localization			60	58.7327	6.75635
Afu3g09820	dvrA C2H2 zinc finger domain protein; putative ortholog of C. albicans Bcr1p; mutants are hypervirulent in neutropenic mice and in flies		30	60	73.1647	9.48096
Afu3g10660	erg13 Putative hydroxymethyl glutaryl-coenzyme A synthase with a predicted role in ergosterol biosynthesis; SrbA-regulated during hypoxia			60	50.7644	6.55127
Afu3g11170	Ortholog(s) have sequence-specific DNA binding activity and role in carotenoid biosynthetic process, circadian rhythm, conidiophore development		30	60	84.1513	6.7124
Afu3g11260	Ubiquitin			60	17.6615	9.77393
Afu3g11360	Ortholog(s) have role in ascospore formation, cellular protein localization, cellular response to caffeine and eukaryotic translation initiation factor 3 complex assembly, <a href="#GOsection">more</a>			60	51.7173	5.35107
Afu3g11430	Putative arginase; SrbA-regulated during hypoxia			60	35.42	5.87158
Afu3g12100	Putative trehalase phosphorylase with a predicted role in the glucose-1-phosphate pathway			60	78.2557	6.1001
Afu3g12690	glfA Putative UDP-galactopyranose mutase, enzyme in the first step of galactofuranose biosynthesis; mutant unmasks mannan residues on the cell surface, which is thought to contribute to increased cell adhesion	10		60	59.4418	6.93213
Afu3g13870	nsdD Putative GATA-type transcriptional activator; required during an early stage of mating; plays a role in resistance toward cell wall stress	10		60	52.9912	9.26123
Afu4g00960	pfkA Putative phosphofructokinase; reacts with rabbit immunosera exposed to A. fumigatus conidia			60	88.6566	7.09326
Afu4g03860	nip1 Eukaryotic translation initiation factor 3 subunit C			60	97.4481	5.13525
Afu4g04318	Ortholog of <i>A. nidulans FGSC A4</i> : AN7011, <i>A. niger CBS 513.88</i> : An14g00530, <i>Aspergillus wentii</i> : Aspwe1_0053203, <i>Aspergillus sydowii</i> : Aspsy1_0184132 and <i>Aspergillus terreus NIH2624</i> : ATET_02726			60	11.343	7.38623
Afu4g04520	Ortholog(s) have mitochondrion localization			60	47.9867	5.70654
Afu4g04660	Ortholog(s) have protein domain specific binding activity			60	43.423	8.17725
Afu4g07580	Translation initiation factor EF-2 gamma subunit			60	56.1044	7.09326
Afu4g07700	Clathrin, heavy chain; transcript downregulated in response to amphotericin B			60	191.183	5.33838
Afu4g07710	Putative pyruvate carboxylase; protein induced by heat shock			60	131.191	6.69775
Afu4g08770	Has domain(s) with predicted microtubule binding activity	10	30		110.14	6.85889
Afu4g10240	Ortholog(s) have mRNA binding activity and role in cellular response to nitrogen starvation, mRNA splicing, via spliceosome, negative regulation of G0 to G1 transition		30		12.831	11.312
Afu4g10460	hcsA Homocitrate synthase, essential enzyme of the alpha-aminoadipate pathway of lysine biosynthesis; transcript highly induced during conidial germination; protein induced by heat shock; SrbA-regulated during hypoxia; no human homolog			60	50.5404	6.01123
Afu4g10780	Ortholog(s) have role in mRNA export from nucleus and nucleus localization			60	450.543	4.99561
Afu4g11160	Ortholog(s) have role in cellular protein localization, regulation of exit from mitosis, regulation of mitotic sister chromatid segregation, spindle pole body duplication	10	30		28.4062	5.36377
Afu4g11340	lys9 Saccharopine dehydrogenase; hypoxia induced protein; transcript induced by exposure to human airway epithelial cells			60	49.4183	6.27783
Afu4g11510	srb1 GDP-mannose pyrophosphorylase, which catalyses the synthesis of GDP-mannose from GTP and mannose-1-phosphate in cell wall biosynthesis			60	40.0991	7.48877
Afu4g12750	Ortholog(s) have role in deadenylation-dependent decapping of nuclear-transcribed mRNA and cytosol, nucleus localization		30	60	84.8371	6.99072
Afu4g13170	cpcB G-protein complex beta subunit; conidia-enriched protein; immunoreactive			60	34.9574	6.52197
Afu5g02210	Ortholog of <i>A. nidulans FGSC A4</i> : AN8034, <i>A. niger CBS 513.88</i> : An02g10730, <i>A. oryzae RIB40</i> : AO090102000294, <i>Aspergillus wentii</i> : Aspwe1_0114775 and <i>Aspergillus sydowii</i> : Aspsy1_0033693	10	30	60	60.7054	9.48096
Afu5g02850	Has domain(s) with predicted arylformamidase activity and role in tryptophan catabolic process to kynurenine		30		36.303	5.21143
Afu5g03560	Putative glutamyl-tRNA synthetase; transcript induced by exposure to human airway epithelial cells			60	81.3732	7.53271
Afu5g03820	Ortholog(s) have role in cell septum assembly, phialide development and spindle pole body localization	10			93.4337	4.97021
Afu5g04210	Putative ubiquinol-cytochrome C reductase complex core protein 2; hypoxia induced protein			60	48.06	8.90967
Afu5g04390	Ortholog of <i>A. nidulans FGSC A4</i> : AN9413/byrA, <i>A. niger CBS 513.88</i> : An09g06870, <i>A. oryzae RIB40</i> : AO090102000647, <i>Aspergillus wentii</i> : Aspwe1_0115474 and <i>Aspergillus sydowii</i> : Aspsy1_0036227	10	30	60	109.293	7.97217
Afu5g04410	Ortholog of <i>A. nidulans FGSC A4</i> : AN11225, <i>Neosartorya fischeri NRRL 181</i> : NFIA_037650, <i>Aspergillus wentii</i> : Aspwe1_0043173 and <i>Aspergillus versicolor</i> : Aspve1_0389199	10			58.9417	11.0923
Afu5g05500	Ortholog(s) have phosphoglycerate dehydrogenase activity, role in serine family amino acid biosynthetic process and cytosol localization		30	60	45.8868	7.00537
Afu5g06390	Putative adenosine kinase			60	36.8353	5.17334
Afu5g07370	Ortholog(s) have metal ion binding, poly(A)-specific ribonuclease activity		30		53.7507	7.07861
Afu5g09910	Putative p-nitroreductase family protein; protein induced by heat shock; Yap1-dependent induction in response to hydrogen peroxide; induced by gliotoxin exposure		30		24.2985	5.90967
Afu5g10570	Cofilin		60		17.0176	5.65576
Afu6g00660	Ortholog(s) have role in asperthecin biosynthetic process		30		35.7539	5.51611
Afu6g02230	glkA Putative glucokinase; conidia-enriched protein; transcripts extremely abundant in resting conidia, levels decline during germination; transcript induced by exposure to human airway epithelial cells			60	54.4198	5.50342
Afu6g02450	Ortholog(s) have cytoplasmic stress granule, cytosol, nucleus localization	10			6.91494	11.5024
Afu6g03440	Putative fructosyl amine; transcript induced by voriconazole			60	54.895	5.75732
Afu6g03820	egd2 Nascent polypeptide-associated complex subunit alpha; predicted role in 'de novo' cotranslational protein folding; enriched in dormant conidia			60	21.959	4.94482
Afu6g05200	60S ribosomal protein L28			60	17.0442	10.8286
Afu6g06720	Putative protein serine/threonine kinase	10		60	99.7949	9.64209
Afu6g07760	Ortholog(s) have structural molecule activity			60	54.4651	6.49365
Afu6g09030	Ortholog of <i>A. nidulans FGSC A4</i> : AN1773, <i>A. niger CBS 513.88</i> : An11g06790, <i>A. oryzae RIB40</i> : AO090001000581, <i>Aspergillus wentii</i> : Aspwe1_0121600 and <i>Aspergillus sydowii</i> : Aspsy1_0038822	10			41.3745	6.69775
Afu6g11070	Ortholog(s) have cytosol, nucleus localization		30	60	89.2486	8.52881
Afu6g11890	Putative dynamin GTPase	10			104.337	6.82959
Afu6g12170	fkbp1 Putative FK506-binding protein (FKBP)-type peptidyl-prolyl cis-trans isomerase; transcript induced by exposure to human airway epithelial cells			60	12.1222	7.25439
Afu6g12300	RNP domain protein; conidia-enriched protein	10			51.7352	9.5542
Afu6g12600	Ortholog of <i>A. nidulans FGSC A4</i> : AN3693, <i>A. niger CBS 513.88</i> : An06g01780, <i>A. oryzae RIB40</i> : AO090003000373, <i>Aspergillus wentii</i> : Aspwe1_0203403 and <i>Aspergillus sydowii</i> : Aspsy1_0892534	10			76.2054	5.5542
Afu6g13370	Ortholog(s) have snoRNA binding activity		30		198.873	5.77002
Afu6g13460	Ortholog of <i>A. nidulans FGSC A4</i> : AN5448, <i>A. niger CBS 513.88</i> : An08g08850, <i>Neosartorya fischeri NRRL 181</i> : NFIA_059420, <i>Aspergillus wentii</i> : Aspwe1_0194392 and <i>Aspergillus versicolor</i> : Aspve1_0053254		30	60	90.3871	8.47021
Afu7g00250	tub2 Tubulin beta-2 subunit; predicted gene pair with AFUA_1G10910 (tubA)	10	30		49.8598	4.98291
Afu7g02180	Ortholog(s) have UDP-N-acetylglucosamine diphosphorylase activity, role in UDP-N-acetylglucosamine biosynthetic process and cytosol, nucleus localization			60	56.6802	6.1001
Afu7g02220	Ortholog of <i>A. nidulans FGSC A4</i> : AN9091, <i>A. niger CBS 513.88</i> : An12g00440, <i>Aspergillus wentii</i> : Aspwe1_0042339, <i>Aspergillus sydowii</i> : Aspsy1_0120658 and <i>Aspergillus terreus NIH2624</i> : ATET_01854			60	30.2838	4.7417
Afu7g03980	Ortholog(s) have role in translational initiation and cytosol, eukaryotic 43S preinitiation complex, eukaryotic translation initiation factor 3 complex, eIF3m, nucleus localization			60	51.0816	5.05908
Afu7g04070	Ortholog(s) have 3-deoxy-7-phosphoheptulonate synthase activity, role in aromatic amino acid family biosynthetic process and cytoplasm, nucleus localization	10			40.0468	6.7417
Afu7g05660	Putative translation elongation factor eEF-3; protein induced by heat shock and hypoxia			60	117.694	6.17627
Afu7g05870	pre8 Putative proteasome subunit; immunoreactive protein; reacts with rabbit immunosera exposed to A. fumigatus conidia		30		30.4438	5.5542
Afu7g05930	mepB Putative metallopeptidase with similarity to mammalian thimet oligopeptidases; conidia-enriched protein; transcript induced by exposure to human airway epithelial cells and by growth on BSA as a sole nitrogen source			60	81.8584	5.78271
Afu8g04360	Has domain(s) with predicted nucleic acid binding, zinc ion binding activity			60	75.0659	8.90967

## Sheet: MpkC
Accession	Description				MW [kDa]	calc. pI
Afu1g01740	Ortholog(s) have unfolded protein binding activity, role in protein folding and chaperonin-containing T-complex, nucleus localization			60	51.8419	5.89697
Afu1g02030	Putative eukaryotic translation initiation factor 3 subunit; protein induced by heat shock			60	57.1551	6.21436
Afu1g02340	Ortholog of <i>A. nidulans FGSC A4</i> : AN0334, <i>A. oryzae RIB40</i> : AO090005000866, <i>Aspergillus wentii</i> : Aspwe1_0169667 and <i>Aspergillus sydowii</i> : Aspsy1_0145773		30		84.4348	5.35107
Afu1g03610	Protein of unknown function; calcium downregulated			60	50.9571	7.18115
Afu1g04620	Putative zinc-containing alcohol dehydrogenase; reacts with rabbit immunosera exposed to A. fumigatus conidia; hypoxia induced protein; transcript up-regulated in conidia exposed to neutrophils; repressed by gliotoxin exposure			60	32.0804	7.43018
Afu1g04900	Proliferating cell nuclear antigen (PCNA); conidia-enriched protein			60	37.8294	6.63916
Afu1g04950	glcA Ortholog(s) have protein serine/threonine phosphatase activity		30		28.3053	4.71631
Afu1g05830	Ortholog(s) have extracellular region localization		30		37.0616	5.78271
Afu1g06710	Ortholog(s) have chaperonin-containing T-complex, nucleus localization			60	210.732	6.04932
Afu1g08840	Ortholog(s) have guanylate kinase activity, role in GMP metabolic process and cytoplasm, nucleus localization			60	60.9935	6.34131
Afu1g09010	Ortholog(s) have cytosol localization			60	25.5231	7.43018
Afu1g09330	Ortholog(s) have sequence-specific DNA binding activity and role in translational initiation			60	72.8652	7.06396
Afu1g09550	Ortholog(s) have role in dynein-driven meiotic oscillatory nuclear movement, karyogamy involved in conjugation with cellular fusion, reciprocal meiotic recombination	10			37.1759	4.88135
Afu1g09970	Ortholog(s) have role in ascospore formation, cellular response to cadmium ion, detoxification of cadmium ion			60	15.3157	5.45264
Afu1g10012	Ortholog of <i>A. nidulans FGSC A4</i> : AN5649, AN1674, AN0384, AN1268, AN7262, <i>A. fumigatus Af293</i> : Afu1g01700, Afu2g17000, Afu4g08730, Afu4g13630 and <i>A. niger CBS 513.88</i> : An01g09380, An01g06520, An04g09080, An04g03600	10			40.9887	6.3667
Afu1g10380	nrps1 AspGDID:ASPL0000102102 COORDS:Chr1_A_fumigatus_Af293:2694887-2675699C, translated using codon table 1 (6247 amino acids) Verified ORF; Non-ribosomal peptide synthetase (NRPS); essential for fumigaclavine C biosynthesis; mutant displays altered conidial surface morphology and hydrophilicity	10			211.956	5.36377
Afu1g11120	Has domain(s) with predicted cytoplasm, nucleus localization	10			694.623	5.94775
Afu1g11480	Protein of unknown function; transcript up-regulated in conidia exposed to neutrophils			60	41.6245	4.65283
Afu1g11730	Ortholog(s) have GTPase activity, role in ER to Golgi vesicle-mediated transport, Golgi to plasma membrane transport, cellular response to drug, macroautophagy and Golgi apparatus, glyoxysome localization			60	18.216	5.52881
Afu1g12940	sakA Putative mitogen-activated protein kinase (MAPK) with predicted roles in the osmotic and oxidative stress responses; involved in sensing nitrogen in the medium	10		60	20.9899	5.70654
Afu1g13490	Afu1g13490 AspGDID:ASPL0000102417 COORDS:Chr1_A_fumigatus_Af293:3586808-3588296W, translated using codon table 1 (293 amino acids) Uncharacterized ORF; Putative spermidine synthase; protein induced by hydrogen peroxide			60	41.9334	5.60498
Afu1g13710	Afu1g13710 AspGDID:ASPL0000102439 COORDS:Chr1_A_fumigatus_Af293:3650512-3647224C, translated using codon table 1 (1064 amino acids) Uncharacterized ORF; Isoleucyl-tRNA synthetase, cytoplasmic			60	33.4237	5.5415
Afu1g13790	hhtA Histone H3	10			122.315	6.43018
Afu1g14120	bfr1 Putative nuclear segregation protein			60	15.3235	11.1509
Afu1g14570	Putative phosphoribosyl-AMP cyclohydrolase; no human homolog			60	57.388	9.12939
Afu1g14680	Ortholog(s) have DNA binding activity and cytosol, nucleus localization		30		92.8238	5.65576
Afu1g15000	Putative isopropylmalate synthase; transcript highly induced during conidial germination; SrbA-regulated during hypoxia			60	193.169	6.21436
Afu1g15450	Ortholog(s) have adenylosuccinate synthase activity, sulfinylpropanyl adenylate synthase activity			60	71.1504	5.68115
Afu1g15460	Ortholog of <i>A. nidulans FGSC A4</i> : AN0892, <i>A. niger CBS 513.88</i> : An01g13900, <i>A. oryzae RIB40</i> : AO090005001665, <i>Aspergillus wentii</i> : Aspwe1_0027562 and <i>Aspergillus sydowii</i> : Aspsy1_0138433		30		46.6189	6.90283
Afu1g15620	helA Putative DEAD box RNA helicase; protein induced by heat shock		30		95.2598	9.61279
Afu2g01010	Putative myo-inositol-phosphate synthase; transcript up-regulated in conidia exposed to neutrophils			60	73.8855	9.86182
Afu2g01040	Putative formaldehyde dehydrogenase; transcript up-regulated in conidia exposed to neutrophils			60	58.6346	6.22705
Afu2g02050	cyp7 Putative peptidyl-prolyl cis-trans isomerase			60	40.0182	7.26904
Afu2g02320	Hsp70 chaperone			60	41.3168	5.98584
Afu2g02530	Ortholog(s) have role in activation of bipolar cell growth, homologous chromosome segregation, protein phosphorylation, regulation of DNA repair and regulation of circadian rhythm, <a href="#GOsection">more</a>	10			61.7457	5.14795
Afu2g02590	Aspartyl-tRNA synthetase			60	42.4086	9.45166
Afu2g03030	prp8 Putative pre-mRNA splicing factor; intein-containing protein, inteins are protein intervening sequences that can self-excise through protein splicing	10	30		61.5887	6.32861
Afu2g03040	Ribosomal protein L34			60	364.449	8.06006
Afu2g03400	Ortholog(s) have ubiquitin-specific protease activity and role in cellular response to drug, mitochondrial fission, peroxisome fission, proteasome-mediated ubiquitin-dependent protein catabolic process, protein deubiquitination	10			21.4242	9.49561
Afu2g03580	Ortholog(s) have phenylalanine-tRNA ligase activity, role in phenylalanyl-tRNA aminoacylation and cytosol, phenylalanine-tRNA ligase complex localization			60	37.4139	6.20166
Afu2g03650	Ortholog of <i>A. nidulans FGSC A4</i> : AN3821, <i>A. niger CBS 513.88</i> : An07g08220, <i>A. oryzae RIB40</i> : AO090120000220, <i>Aspergillus wentii</i> : Aspwe1_0172303 and <i>Aspergillus sydowii</i> : Aspsy1_0030705			60	58.509	7.44482
Afu2g03730	Putative high affinity copper transporter; transcript up-regulated in hyphae upon exposure to neutrophils	10			57.9181	6.34131
Afu2g03810	hosA Putative histone deacetylase		30	60	28.3308	7.86963
Afu2g04310	Argininosuccinate synthase; hypoxia induced protein			60	54.3098	6.13818
Afu2g04710	Has domain(s) with predicted heme binding activity			60	46.1043	5.47803
Afu2g04820	Putative translation release factor eRF3; transcript induced by exposure to human airway epithelial cells	10			23.8966	5.59229
Afu2g05650	Ortholog(s) have asparagine-tRNA ligase activity, role in asparaginyl-tRNA aminoacylation and cytosol localization			60	77.2757	8.04541
Afu2g05910	hxkA Putative hexokinase; protein induced by heat shock			60	68.2394	6.13818
Afu2g06150	pdiA Putative protein disulfide isomerase; conidial surface associated			60	54.1746	5.17334
Afu2g07410	Ortholog(s) have role in anisotropic cell growth, hyphal growth	10			56.152	4.70361
Afu2g07420	sac6 Putative actin-bundling protein, fimbrin; conidia-enriched protein			60	26.5249	9.64209
Afu2g07620	Cystathionine beta-synthase; transcript induced by exposure to human airway epithelial cells			60	72.4336	6.12549
Afu2g07960	Ortholog(s) have role in regulation of translational elongation and cytosolic ribosome, extracellular region, mitochondrion localization		30		57.7783	6.97607
Afu2g09490	Eukaryotic translation initiation factor subunit eIF-4F			60	291.954	5.85889
Afu2g09910	faa4 Putative long chain fatty acid CoA ligase; fatty acid activator; hypoxia repressed protein	10			163.883	9.36377
Afu2g10070	Putative carbamoyl-phosphate synthetase, large subunit			60	76.6677	7.31299
Afu2g10100	aspf8 Allergen Asp f 8; putative ribosomal protein P2; transcript induced by growth on hydrogen peroxide and menadione			60	129.134	6.21436
Afu2g10380	Has domain(s) with predicted translation initiation factor activity and eukaryotic translation initiation factor 3 complex localization			60	11.1346	4.33545
Afu2g10420	Has domain(s) with predicted branched-chain-amino-acid transaminase activity, catalytic activity and role in branched-chain amino acid metabolic process, metabolic process			60	54.6692	5.33838
Afu2g10600	Putative NADH dehydrogenase; mutation causes increased azole resistance	10			43.9797	6.55127
Afu2g10660	mpdA Putative mannitol-1-phosphate dehydrogenase; conidia-enriched protein; protein induced by heat shock; reacts with rabbit immunosera exposed to conidia; no human homolog			60	27.5249	5.03369
Afu2g11260	luA Putative 3-isopropylmalate dehydratase with a predicted role in nitrogen metabolism; protein induced by heat shock; SrbA-regulated during hypoxia			60	42.9772	5.89697
Afu2g11510	Ortholog(s) have role in cellular response to drug, rRNA processing, ribosomal large subunit biogenesis, ribosomal subunit export from nucleus and nucleolus, preribosome, large subunit precursor, spindle localization	10			84.0235	5.93506
Afu2g11940	ade13 Adenylosuccinate lyase; reacts with rabbit immunosera exposed to A. fumigatus conidia			60	73.251	8.86572
Afu2g12150	Ortholog(s) have role in rRNA processing, ribosomal large subunit assembly and mitochondrion, mitotic spindle pole body, nucleoplasm localization	10			54.6911	6.55127
Afu2g13090	Ortholog(s) have DNA binding, RNA polymerase II activity, RNA-directed RNA polymerase activity, role in response to drug, termination of RNA polymerase II transcription and DNA-directed RNA polymerase II, core complex, cytosol localization		30		550.249	5.09717
Afu2g13240	Putative V-type ATPase, B subunit; transcript induced by exposure to human airway epithelial cells			60	36.7777	4.66553
Afu2g13710	NADH-ubiquinone oxidoreductase 49 kDa subunit	10			56.383	5.99854
Afu2g13860	Histone H4			60	52.8217	6.65381
Afu2g14010	Ortholog of <i>A. nidulans FGSC A4</i> : AN6370, <i>A. oryzae RIB40</i> : AO090026000159, <i>Aspergillus wentii</i> : Aspwe1_0696714, <i>Aspergillus sydowii</i> : Aspsy1_0031745 and <i>Aspergillus terreus NIH2624</i> : ATET_01392			60	15.7624	10.2134
Afu2g14030	Ortholog(s) have arginine-tRNA ligase activity, role in arginyl-tRNA aminoacylation and cytosol, mitochondrion localization			60	72.3026	9.43701
Afu2g14210	ilv3 Putative mitochondrial dihydroxy acid dehydratase; hypoxia induced protein; induced by exposure to human airway epithelial cells; required for virulence			60	80.6727	8.00146
Afu2g16520	pld2 Putative phospholipase D; calcium induced; repressed by exposure to artemisinin			60	64.7161	7.6499
Afu3g01110	gua1 Putative GMP synthase ([glutamine-hydrolyzing); Yap1-dependent induction in response to hydrogen peroxide			60	123.353	6.65381
Afu3g01580	Putative glucose-methanol-choline (GMC) oxidoreductase; protein induced by hydrogen peroxide; hypoxia induced protein; repressed by gliotoxin exposure			60	59.4337	6.26514
Afu3g04310	Ortholog(s) have cell division site, cytosol, mitotic spindle pole body, nucleus localization		30		72.1047	7.41553
Afu3g05450	Putative glutamate carboxypeptidase			60	93.2563	7.41553
Afu3g06460	Protein of unknown function; hypoxia induced protein			60	52.9817	5.71924
Afu3g06530	sC Putative ATP sulfurylase; sulfate adenylyltransferase; reacts with rabbit immunosera exposed to A. fumigatus conidia; hypoxia repressed protein			60	16.3873	9.33447
Afu3g06550	Has domain(s) with predicted phosphatase activity, phosphoserine phosphatase activity and role in L-serine biosynthetic process, metabolic process	10	30		64.2932	7.06396
Afu3g06550	Has domain(s) with predicted phosphatase activity, phosphoserine phosphatase activity and role in L-serine biosynthetic process, metabolic process			60	51.8419	5.89697
Afu3g06610	Proteasome regulatory particle subunit; transcript induced by exposure to human airway epithelial cells			60	58.4077	7.18115
Afu3g06720	Ortholog of <i>Aspergillus fumigatus A1163</i> : AFUB_042330	10			38.7643	8.38232
Afu3g07480	Ortholog(s) have nucleus localization		30		80.9236	9.81787
Afu3g07680	Putative ran GTPase activating protein			60	46.1998	4.67822
Afu3g07820	Ortholog(s) have role in positive regulation of RNA polymerase II transcriptional preinitiation complex assembly, positive regulation of protein catabolic process and proteasome regulatory particle assembly, <a href="#GOsection">more</a>			60	48.8533	7.66455
Afu3g08040	Ortholog(s) have DNA-directed RNA polymerase activity, role in regulation of cytokinetic cell separation by regulation of transcription from RNA polymerase II promoter, transcription from RNA polymerase II promoter and nucleus localization		30		16.8217	5.61768
Afu3g08460	60S ribosomal protein L35Ae			60	12.3376	11.2241
Afu3g08640	Ortholog(s) have sequence-specific DNA binding activity and role in cellular response to drug, cellular response to osmotic stress, translational initiation			60	37.6889	6.69775
Afu3g08650	Putative C1-tetrahydrofolate synthase; transcript up-regulated in conidia exposed to neutrophils			60	100.46	7.44482
Afu3g09090	Ortholog(s) have mitochondrion, nucleus localization	10			43.3361	9.01221
Afu3g09280	Has domain(s) with predicted ribosome binding, translation initiation factor activity, role in regulation of translational initiation and eukaryotic translation initiation factor 3 complex localization		30		34.3175	5.26221
Afu3g09370	Ortholog(s) have role in establishment of cell polarity, establishment of nucleus localization, microtubule nucleation by spindle pole body, mitotic sister chromatid segregation		30		146.999	6.81494
Afu3g09590	Ortholog(s) have role in cellular response to drug and chaperonin-containing T-complex, nucleus localization			60	58.7327	6.75635
Afu3g11170	Ortholog(s) have sequence-specific DNA binding activity and role in carotenoid biosynthetic process, circadian rhythm, conidiophore development		30	60	84.1513	6.7124
Afu3g11260	Ubiquitin			60	17.6615	9.77393
Afu3g11360	Ortholog(s) have role in ascospore formation, cellular protein localization, cellular response to caffeine and eukaryotic translation initiation factor 3 complex assembly, <a href="#GOsection">more</a>			60	51.7173	5.35107
Afu3g11400	pep2 Aspartic acid endopeptidase; conidia-enriched protein; conidial surface associated; predicted signal secretion sequence; hypoxia induced protein; transcript up-regulated in conidia exposed to neutrophils and by growth on BSA			60	43.3277	4.99561
Afu3g11430	Putative arginase; SrbA-regulated during hypoxia			60	35.42	5.87158
Afu3g11640	Homoserine dehydrogenase; no human homolog	10			38.4803	5.87158
Afu3g11710	Ortholog(s) have mRNA binding, saccharopine dehydrogenase (NAD+, L-lysine-forming) activity, role in lysine biosynthetic process via aminoadipic acid and cytoplasm localization			60	41.1903	5.33838
Afu3g12100	Putative trehalase phosphorylase with a predicted role in the glucose-1-phosphate pathway			60	78.2557	6.1001
Afu3g12510	Ortholog(s) have cytoplasm localization	10			90.2938	7.03467
Afu3g12690	glfA Putative UDP-galactopyranose mutase, enzyme in the first step of galactofuranose biosynthesis; mutant unmasks mannan residues on the cell surface, which is thought to contribute to increased cell adhesion			60	59.4418	6.93213
Afu3g13480	Translation initiation factor 2 alpha subunit			60	35.014	5.8208
Afu3g13680	Has domain(s) with predicted alcohol O-acetyltransferase activity and role in alcohol metabolic process	10			54.7503	8.1333
Afu3g13700	Has domain(s) with predicted catalytic activity, phosphopantetheine binding, transferase activity, transferring acyl groups other than amino-acyl groups activity and role in metabolic process	10			109.832	6.01123
Afu3g14260	Ortholog of <i>A. niger CBS 513.88</i> : An09g04240, <i>A. oryzae RIB40</i> : AO090012000670, <i>Neosartorya fischeri NRRL 181</i> : NFIA_063040 and <i>Aspergillus wentii</i> : Aspwe1_0038047			60	18.9311	5.66846
Afu4g03760	Putative glycine dehydrogenase			60	115.13	7.15186
Afu4g03860	nip1 Eukaryotic translation initiation factor 3 subunit C			60	97.4481	5.13525
Afu4g04318	Ortholog of <i>A. nidulans FGSC A4</i> : AN7011, <i>A. niger CBS 513.88</i> : An14g00530, <i>Aspergillus wentii</i> : Aspwe1_0053203, <i>Aspergillus sydowii</i> : Aspsy1_0184132 and <i>Aspergillus terreus NIH2624</i> : ATET_02726			60	11.343	7.38623
Afu4g04350	Has domain(s) with predicted nucleoside-triphosphatase activity, nucleotide binding, pre-mRNA intronic binding activity, role in mRNA splicing, via spliceosome and spliceosomal complex localization		30		161.396	6.31592
Afu4g04520	Ortholog(s) have mitochondrion localization			60	47.9867	5.70654
Afu4g04550	Putative phosphoribosyltransferase; protein induced by hydrogen peroxide		30		23.1709	5.32568
Afu4g04660	Ortholog(s) have protein domain specific binding activity			60	43.423	8.17725
Afu4g07030	Transcript up-regulated in conidia exposed to neutrophils			60	27.8691	8.71924
Afu4g07580	Translation initiation factor EF-2 gamma subunit			60	56.1044	7.09326
Afu4g07700	Clathrin, heavy chain; transcript downregulated in response to amphotericin B			60	191.183	5.33838
Afu4g07710	Putative pyruvate carboxylase; protein induced by heat shock			60	131.191	6.69775
Afu4g08770	Has domain(s) with predicted microtubule binding activity		30		110.14	6.85889
Afu4g09030	Putative aminopeptidase; conidia-enriched protein; protein induced by heat shock; transcript induced by exposure to human airway epithelial cells; induced by gliotoxin exposure			60	106.16	6.7417
Afu4g09110	ccp1 Putative cytochrome c peroxidase; protein induced by heat shock and by hydrogen peroxide; transcript up-regulated in conidia exposed to neutrophils	10			40.3542	8.55811
Afu4g10240	Ortholog(s) have mRNA binding activity and role in cellular response to nitrogen starvation, mRNA splicing, via spliceosome, negative regulation of G0 to G1 transition	10	30		12.831	11.312
Afu4g10460	hcsA Homocitrate synthase, essential enzyme of the alpha-aminoadipate pathway of lysine biosynthesis; transcript highly induced during conidial germination; protein induced by heat shock; SrbA-regulated during hypoxia; no human homolog			60	50.5404	6.01123
Afu4g10730	Ortholog(s) have ATP-dependent 3'-5' DNA helicase activity, ATP-dependent 5'-3' DNA helicase activity, sequence-specific DNA binding activity	10			49.6891	6.29053
Afu4g11160	Ortholog(s) have role in cellular protein localization, regulation of exit from mitosis, regulation of mitotic sister chromatid segregation, spindle pole body duplication		30		28.4062	5.36377
Afu4g11340	lys9 Saccharopine dehydrogenase; hypoxia induced protein; transcript induced by exposure to human airway epithelial cells			60	49.4183	6.27783
Afu4g11510	srb1 GDP-mannose pyrophosphorylase, which catalyses the synthesis of GDP-mannose from GTP and mannose-1-phosphate in cell wall biosynthesis			60	40.0991	7.48877
Afu4g13170	cpcB G-protein complex beta subunit; conidia-enriched protein; immunoreactive			60	34.9574	6.52197
Afu4g13700	Ortholog(s) have cytosol localization			60	84.4129	7.09326
Afu4g13720	mpkA Mitogen-activated protein kinase; activated by phosphorylation; role in cell wall signaling and the oxidative stress response; mpkA(p)-lacZ expression increased by cell wall disturbing compounds; required for adaptation to iron starvation		30		48.4352	5.88428
Afu5g01440	Ortholog(s) have thioredoxin peroxidase activity, role in cell redox homeostasis, cellular response to oxidative stress, response to metal ion and peroxisome, plasma membrane localization			60	21.9364	8.35303
Afu5g02180	Cysteine synthase (o-acetylserine (thiol)-lyase); transcript induced by exposure to human airway epithelial cells			60	40.1046	8.06006
Afu5g02910	NAP family protein			60	41.0408	4.50049
Afu5g03560	Putative glutamyl-tRNA synthetase; transcript induced by exposure to human airway epithelial cells			60	81.3732	7.53271
Afu5g03690	Ortholog(s) have phosphatidylinositol transporter activity			60	46.141	4.84326
Afu5g03820	Ortholog(s) have role in cell septum assembly, phialide development and spindle pole body localization		30		93.4337	4.97021
Afu5g04210	Putative ubiquinol-cytochrome C reductase complex core protein 2; hypoxia induced protein			60	48.06	8.90967
Afu5g04250	cysD Homocysteine synthase; transcript up-regulated in conidia exposed to neutrophils			60	46.8658	6.354
Afu5g05490	Ortholog(s) have cytosol localization			60	54.1563	6.43018
Afu5g05500	Ortholog(s) have phosphoglycerate dehydrogenase activity, role in serine family amino acid biosynthetic process and cytosol localization		30	60	45.8868	7.00537
Afu5g05920	Putative glycyl-tRNA synthetase; protein induced by heat shock			60	79.0498	6.46826
Afu5g06040	Ortholog(s) have ubiquitin binding activity, role in negative regulation of protein catabolic process, nucleotide-excision repair, protein ubiquitination and cytosol, nuclear envelope localization			60	39.8048	4.64014
Afu5g06390	Putative adenosine kinase			60	36.8353	5.17334
Afu5g09100	mpkC Putative mitogen activated protein kinase (MAPK); involved in the oxidative stress response; transcript abundance increases in response to carbon source and oxidative stress	10	30	60	43.2801	5.75732
Afu5g09250	Ortholog(s) have cytosol localization		30		108.614	6.29053
Afu5g09910	Putative p-nitroreductase family protein; protein induced by heat shock; Yap1-dependent induction in response to hydrogen peroxide; induced by gliotoxin exposure			60	24.2985	5.90967
Afu5g10610	rip1 Ubiquinol-cytochrome c reductase iron-sulphur subunit precursor with a predicted role in oxidative phosphorylation; hypoxia induced protein; induced by exposure to artemisinin; SrbA-regulated during hypoxia			60	32.5887	8.95361
Afu5g10640	Ortholog(s) have tyrosine-tRNA ligase activity, role in tyrosyl-tRNA aminoacylation and cytosol, nucleus localization			60	43.5878	6.58057
Afu5g11000	Ortholog(s) have U2 snRNP, cytosol localization		30		28.7853	8.29443
Afu5g11040	Ortholog(s) have pantoate-beta-alanine ligase activity, role in pantothenate biosynthetic process and cytosol, nucleus localization	10			39.7746	8.20654
Afu5g11240	Ortholog(s) have carbonyl reductase (NADPH) activity, oxidoreductase activity, acting on the aldehyde or oxo group of donors, NAD or NADP as acceptor activity and cytosol, nucleus, ribosome localization			60	33.6528	8.98291
Afu5g11720	Ortholog(s) have role in proteasome-mediated ubiquitin-dependent protein catabolic process and cytosol, nucleus localization			60	100.736	5.0083
Afu5g13100	Ortholog of <i>A. nidulans FGSC A4</i> : AN6856, <i>A. niger CBS 513.88</i> : An14g06050, <i>A. oryzae RIB40</i> : AO090120000435, <i>Aspergillus wentii</i> : Aspwe1_0107169 and <i>Aspergillus sydowii</i> : Aspsy1_0040420			60	14.0979	6.55127
Afu5g13360	Ortholog(s) have role in cellular response to starvation, cytoplasmic mRNA processing body assembly and deadenylation-independent decapping of nuclear-transcribed mRNA, <a href="#GOsection">more</a>		30		76.0323	7.21045
Afu6g01940	Dienelactone hydrolase family protein; transcript up-regulated in conidia exposed to neutrophils			60	34.9877	8.5874
Afu6g02230	glkA Putative glucokinase; conidia-enriched protein; transcripts extremely abundant in resting conidia, levels decline during germination; transcript induced by exposure to human airway epithelial cells			60	54.4198	5.50342
Afu6g02450	Ortholog(s) have cytoplasmic stress granule, cytosol, nucleus localization	10			6.91494	11.5024
Afu6g02800	Putative glycosylphosphatidylinositol (GPI)-anchored protein; transcript up-regulated in hyphae upon exposure to neutrophils	10			24.5928	4.76709
Afu6g02830	Has domain(s) with predicted oxidoreductase activity, role in oxidation-reduction process and mitochondrion localization			60	14.3505	8.19189
Afu6g03440	Putative fructosyl amine; transcript induced by voriconazole			60	54.895	5.75732
Afu6g03460	Has domain(s) with predicted ATP binding activity		30	60	63.4223	6.13818
Afu6g03730	2-methylcitrate dehydratase; hypoxia repressed protein; transcript up-regulated in conidia exposed to neutrophils and to human airway epithelial cells; no human homolog			60	62.0658	8.36768
Afu6g03820	egd2 Nascent polypeptide-associated complex subunit alpha; predicted role in 'de novo' cotranslational protein folding; enriched in dormant conidia			60	21.959	4.94482
Afu6g04010	Ortholog(s) have importin-alpha export receptor activity, role in cell division, protein export from nucleus and nuclear membrane localization			60	108.421	5.37646
Afu6g04660	Ortholog(s) have role in chromatin silencing at centromere, mitotic sister chromatid segregation, pericentric heterochromatin assembly, protein localization to kinetochore		30		19.7146	11.1655
Afu6g05200	60S ribosomal protein L28			60	17.0442	10.8286
Afu6g06780	rpt4 Proteasome regulatory particle subunit; transcript induced by exposure to human airway epithelial cells			60	44.0853	5.80811
Afu6g06880	Ortholog(s) have double-stranded DNA binding, histone binding activity		30		50.1145	4.70361
Afu6g07430	Putative pyruvate kinase; reacts with rabbit immunosera exposed to A. fumigatus conidia			60	58.348	7.03467
Afu6g07540	Ortholog(s) have chaperonin-containing T-complex localization			60	59.8493	5.51611
Afu6g07760	Ortholog(s) have structural molecule activity			60	54.4651	6.49365
Afu6g08240	Ortholog(s) have nucleolus localization	10			294.146	6.771
Afu6g08310	pre2 Putative proteosome component	10			32.6342	6.78564
Afu6g08580	fkbp4 Putative FK506-binding protein (FKBP)-type peptidyl-prolyl cis-trans isomerase		30	60	53.0452	4.55127
Afu6g08660	Ortholog of <i>A. nidulans</i> AN3906; hypoxia repressed protein			60	131.817	5.09717
Afu6g08810	Ortholog(s) have role in ascospore formation, mitochondrial respiratory chain complex I assembly, programmed cell death and mitochondrion, plasma membrane localization			30	32.5615	8.29443
Afu6g08960	pre9 Putative proteasome component			30	28.1882	6.15088
Afu6g09990	Ortholog(s) have cytosol, nuclear envelope, nuclear membrane, nucleolus localization			60	121.526	4.729
Afu6g10610	Putative ribose 5-phosphate isomerase A			60	28.359	6.25244
Afu6g11890	Putative dynamin GTPase	10	30		104.337	6.82959
Afu6g12170	fkbp1 Putative FK506-binding protein (FKBP)-type peptidyl-prolyl cis-trans isomerase; transcript induced by exposure to human airway epithelial cells			60	12.1222	7.25439
Afu6g12300	RNP domain protein; conidia-enriched protein	10			51.7352	9.5542
Afu6g12400	fks1 Putative 1,3-beta-glucan synthase catalytic subunit, major subunit of glucan synthase; predicted transmembrane protein; essential		30		217.994	8.14795
Afu6g13330	Putative RNA binding protein of unknown function; conidia-enriched protein; transcript up-regulated in conidia exposed to neutrophils			60	12.4831	6.15088
Afu6g13410	Ortholog(s) have U2 snRNP localization	10	30		135.115	5.21143
Afu6g13930	Putative polyketide synthase (PKS), encoded in a predicted secondary metabolite gene cluster	10			265.653	6.23975
Afu6g14200	erg10 Putative acetyl-CoA acetyltransferase; transcript up-regulated in conidia exposed to neutrophils; SrbA-regulated during hypoxia			60	45.6818	8.95361
Afu6g14280	Protein of unknown function; calcium downregulated			60	58.3702	9.23193
Afu6g14330	Ortholog(s) have cytosol localization			60	138.541	6.12549
Afu7g00250	tub2 Tubulin beta-2 subunit; predicted gene pair with AFUA_1G10910 (tubA)	10			49.8598	4.98291
Afu7g01860	sti1 Putative heat shock protein; protein levels increase in response to amphotericin B; transcript induced by exposure to human airway epithelial cells; induced by gliotoxin exposure			60	64.2614	5.57959
Afu7g01920	Ortholog(s) have DNA binding, DNA-directed RNA polymerase activity, RNA binding activity and role in chromatin silencing by small RNA, transcription from RNA polymerase II promoter		30		141.834	6.60986
Afu7g02180	Ortholog(s) have UDP-N-acetylglucosamine diphosphorylase activity, role in UDP-N-acetylglucosamine biosynthetic process and cytosol, nucleus localization			60	56.6802	6.1001
Afu7g02220	Ortholog of <i>A. nidulans FGSC A4</i> : AN9091, <i>A. niger CBS 513.88</i> : An12g00440, <i>Aspergillus wentii</i> : Aspwe1_0042339, <i>Aspergillus sydowii</i> : Aspsy1_0120658 and <i>Aspergillus terreus NIH2624</i> : ATET_01854			60	30.2838	4.7417
Afu7g02230	nuclear-transcribed mRNA poly(A) tail shortening and cytosol localization	10		60	44.8172	5.75732
Afu7g02310	Putative adenine phosphoribosyltransferase 1; transcript induced by exposure to human airway epithelial cells; induced by gliotoxin exposure			60	23.6063	6.39209
Afu7g02570	Ortholog of <i>A. nidulans FGSC A4</i> : AN9067/tinC, AN2167/hetC, <i>A. fumigatus Af293</i> : Afu2g15840, <i>A. niger CBS 513.88</i> : An15g06140 and <i>A. oryzae RIB40</i> : AO090038000633, AO090012000230			60	101.106	5.05908
Afu7g03740	cyp51B Putative 14-alpha demethylase with a predicted role in ergosterol biosynthesis; transcript upregulated in response to amphotericin B; SrbA-regulated during hypoxia		30	60	58.8932	7.75244
Afu7g03980	Ortholog(s) have role in translational initiation and cytosol, eukaryotic 43S preinitiation complex, eukaryotic translation initiation factor 3 complex, eIF3m, nucleus localization			60	51.0816	5.05908
Afu7g05070	frdA Putative FAD-dependent oxidoreductase; immunoreactive protein			60	51.2359	6.0874
Afu7g05470	Putative electron transfer flavoprotein alpha subunit; transcript induced by exposure to human airway epithelial cells; induced by exposure to artemisinin			60	36.6673	6.27783
Afu7g05660	Putative translation elongation factor eEF-3; protein induced by heat shock and hypoxia			60	117.694	6.17627
Afu7g05870	pre8 Putative proteasome subunit; immunoreactive protein; reacts with rabbit immunosera exposed to A. fumigatus conidia		30		30.4438	5.5542
Afu7g05930	mepB Putative metallopeptidase with similarity to mammalian thimet oligopeptidases; conidia-enriched protein; transcript induced by exposure to human airway epithelial cells and by growth on BSA as a sole nitrogen source			60	81.8584	5.78271
Afu7g06010	Ortholog(s) have mitochondrion localization			60	19.5816	9.70068
Afu8g03880	Putative alanyl-tRNA synthetase; protein induced by hydrogen peroxide			60	113.644	6.48096
Afu8g03990	Ortholog(s) have U5 snRNP, cytosol, spliceosomal complex localization	10			110.12	5.08447
Afu8g04270	Ortholog(s) have nucleus localization		30		183.954	5.60498
Afu8g05330	Putative methylenetetrahydrofolate dehydrogenase	10			33.0434	6.53662
Afu8g05580	coaT Putative coenzyme A transferase; transcript induced by exposure to human airway epithelial cells			60	58.1086	6.771
Afu8g05600	Ortholog of <i>A. nidulans FGSC A4</i> : AN1549, <i>A. niger CBS 513.88</i> : An16g07080, <i>A. oryzae RIB40</i> : AO090005000583, <i>Aspergillus wentii</i> : Aspwe1_0187131 and <i>Aspergillus sydowii</i> : Aspsy1_0086712		30		9.2825	9.979
Afu8g07130	AhpC/TSA family thioredoxin peroxidase; conidia-enriched protein; transcript up-regulated in conidia exposed to neutrophils and to human airway epithelial cells			60	29.5877	9.24658

## Sheet: MpkC and SakA
Afu1g03610
Afu1g04620
Afu1g04900
Afu1g08840
Afu1g09010
Afu1g10012
Afu1g11730
Afu1g12940
Afu1g13490
Afu1g13710
Afu1g14570
Afu1g15460
Afu1g15620
Afu2g02320
Afu2g02590
Afu2g03030
Afu2g03580
Afu2g03810
Afu2g04310
Afu2g04820
Afu2g06150
Afu2g07620
Afu2g07960
Afu2g10100
Afu2g10420
Afu2g11510
Afu2g11940
Afu2g13860
Afu2g14010
Afu3g06550
Afu3g07820
Afu3g08460
Afu3g08640
Afu3g09090
Afu3g09370
Afu3g09590
Afu3g11170
Afu3g11260
Afu3g11360
Afu3g11430
Afu3g12100
Afu3g12690
Afu4g03860
Afu4g04318
Afu4g04520
Afu4g04660
Afu4g07580
Afu4g07700
Afu4g07710
Afu4g08770
Afu4g10240
Afu4g10460
Afu4g11160
Afu4g11340
Afu4g11510
Afu4g13170
Afu5g03560
Afu5g03820
Afu5g04210
Afu5g05500
Afu5g06390
Afu5g09910
Afu6g02230
Afu6g02450
Afu6g03440
Afu6g03820
Afu6g05200
Afu6g07760
Afu6g11890
Afu6g12170
Afu6g12300
Afu7g00250
Afu7g02180
Afu7g02220
Afu7g03980
Afu7g05660
Afu7g05870
Afu7g05930

## Sheet: MpkC only
Afu1g01740
Afu1g02030
Afu1g02340
Afu1g04950
Afu1g05830
Afu1g06710
Afu1g09330
Afu1g09550
Afu1g09970
Afu1g10380
Afu1g11120
Afu1g11480
Afu1g13790
Afu1g14120
Afu1g14680
Afu1g15000
Afu1g15450
Afu2g01010
Afu2g01040
Afu2g02050
Afu2g02530
Afu2g03040
Afu2g03400
Afu2g03650
Afu2g03730
Afu2g04710
Afu2g05650
Afu2g05910
Afu2g07410
Afu2g07420
Afu2g09490
Afu2g09910
Afu2g10070
Afu2g10380
Afu2g10600
Afu2g10660
Afu2g11260
Afu2g12150
Afu2g13090
Afu2g13240
Afu2g13710
Afu2g14030
Afu2g14210
Afu2g16520
Afu3g01110
Afu3g01580
Afu3g04310
Afu3g05450
Afu3g06460
Afu3g06530
Afu3g06610
Afu3g06720
Afu3g07480
Afu3g07680
Afu3g08040
Afu3g08650
Afu3g09280
Afu3g11400
Afu3g11640
Afu3g11710
Afu3g12510
Afu3g13480
Afu3g13680
Afu3g13700
Afu3g14260
Afu4g03760
Afu4g04350
Afu4g04550
Afu4g07030
Afu4g09030
Afu4g09110
Afu4g10730
Afu4g13700
Afu4g13720
Afu5g01440
Afu5g02180
Afu5g02910
Afu5g03690
Afu5g04250
Afu5g05490
Afu5g05920
Afu5g06040
Afu5g09100
Afu5g09250
Afu5g10610
Afu5g10640
Afu5g11000
Afu5g11040
Afu5g11240
Afu5g11720
Afu5g13100
Afu5g13360
Afu6g01940
Afu6g02800
Afu6g02830
Afu6g03460
Afu6g03730
Afu6g04010
Afu6g04660
Afu6g06780
Afu6g06880
Afu6g07430
Afu6g07540
Afu6g08240
Afu6g08310
Afu6g08580
Afu6g08660
Afu6g08810
Afu6g08960
Afu6g09990
Afu6g10610
Afu6g12400
Afu6g13330
Afu6g13410
Afu6g13930
Afu6g14200
Afu6g14280
Afu6g14330
Afu7g01860
Afu7g01920
Afu7g02230
Afu7g02310
Afu7g02570
Afu7g03740
Afu7g05070
Afu7g05470
Afu7g06010
Afu8g03880
Afu8g03990
Afu8g04270
Afu8g05330
Afu8g05580
Afu8g05600
Afu8g07130

## Sheet: SakA only
Afu1g02190
Afu1g02270
Afu1g02940
Afu1g03100
Afu1g04850
Afu1g05620
Afu1g05660
Afu1g10850
Afu1g15810
Afu1g17350
Afu2g02770
Afu2g03490
Afu2g04010
Afu2g07730
Afu2g12230
Afu3g06640
Afu3g08120
Afu3g08940
Afu3g09820
Afu3g10660
Afu3g13870
Afu4g00960
Afu4g10780
Afu4g12750
Afu5g02210
Afu5g02850
Afu5g04390
Afu5g04410
Afu5g07370
Afu5g10570
Afu6g00660
Afu6g06720
Afu6g09030
Afu6g11070
Afu6g12600
Afu6g13370
Afu6g13460
Afu7g04070
Afu8g04360

## Sheet: Summary
Set Name	Count Number
mpkC	212
sakA	117
mpkC & sakA	78
mpkC only	134
sakA only	39
Combined	251
