# Supplementary material for: Aspergillus fumigatus High Osmolarity Glycerol Mitogen Activated Protein Kinases SakA and MpkC Physically Interact During Osmotic and Cell Wall Stresses
Source: Front Microbiol. 2019 May 7;10:918. doi: 10.3389/fmicb.2019.00918 (PMC6514138; doi:10.3389/fmicb.2019.00918)
Supplement: Supplementary file 12 [file Table_12.xls]

## Sheet: string_protein_annotations(1)
Supplementary Table S12 - String protein annotations for MpkC:GFP and SakA:GFP in the presence of sorbitol or congo red
#node	identifier	domain_summary_url	annotation	other_names_and_aliases
CADAFUBP00000106	746128.CADAFUBP00000106	https://smart.embl.de/smart/DDvec.cgi?smart=270:Pfam_Reticulon(2|157)+	Reticulon-like protein	3508558	AFUA_6G13670	CADAFUBG00000107	CADAFUBG00000107	CADAFUBP00000106	CADAFUBP00000106	CADAFUBT00000107	CADAFUBT00000107	Q4WLF9	Q4WLF9_ASPFU	Reticulon-like protein	Reticulon-like protein	Reticulon-like protein	XP_751243	XP_751243.1	afm:AFUA_6G13670
CADAFUBP00000139	746128.CADAFUBP00000139	https://smart.embl.de/smart/DDvec.cgi?smart=112:Pfam_SBDS(6|99)+	RNA binding protein, putative	3508518	AFUA_6G13330	CADAFUBG00000144	CADAFUBG00000144	CADAFUBP00000139	CADAFUBP00000139	CADAFUBT00000144	CADAFUBT00000144	Putative uncharacterized protein	Putative uncharacterized protein	Q4WLJ3	Q4WLJ3_ASPFU	RNA binding protein, putative	XP_751209	XP_751209.2	afm:AFUA_6G13330
CADAFUBP00000157	746128.CADAFUBP00000157	https://smart.embl.de/smart/DDvec.cgi?smart=232:Pfam_DHBP_synthase(15|219)+	3,4-dihydroxy-2-butanone 4-phosphate synthase; Catalyzes the conversion of D-ribulose 5-phosphate to formate and 3,4-dihydroxy-2-butanone 4-phosphate	3,4-dihydroxy-2-butanone 4-phosphate synthase	3,4-dihydroxy-2-butanone 4-phosphate synthase	3,4-dihydroxy-2-butanone 4-phosphate synthase	3508498	4.1.99.12	AFUA_6G13140	CADAFUBG00000162	CADAFUBG00000162	CADAFUBP00000157	CADAFUBP00000157	CADAFUBT00000162	CADAFUBT00000162	EC 4.1.99.12	Q4WLL1	Q4WLL1_ASPFU	XP_751191	XP_751191.1	afm:AFUA_6G13140
CADAFUBP00000209	746128.CADAFUBP00000209	https://smart.embl.de/smart/DDvec.cgi?smart=557:Pfam_Cpn60_TCP1(40|530)+	T-complex protein 1, beta subunit, putative; Molecular chaperone; assists the folding of proteins upon ATP hydrolysis	3507262	AFUA_1G01740	CADAFUBG00000214	CADAFUBG00000214	CADAFUBP00000209	CADAFUBP00000209	CADAFUBT00000214	CADAFUBT00000214	Q4WKP6	Q4WKP6_ASPFU	T-complex protein 1, beta subunit, putative	T-complex protein 1, beta subunit, putative	T-complex protein 1, beta subunit, putative	XP_749924	XP_749924.1	afm:AFUA_1G01740
prt1	746128.CADAFUBP00000236	https://smart.embl.de/smart/DDvec.cgi?smart=740:RRM(41|122)+Pfam_eIF2A(401|624)+	Eukaryotic translation initiation factor 3 subunit B; RNA-binding component of the eukaryotic translation initiation factor 3 (eIF-3) complex, which is involved in protein synthesis of a specialized repertoire of mRNAs and, together with other initiation factors, stimulates binding of mRNA and methionyl-tRNAi to the 40S ribosome. The eIF-3 complex specifically targets and initiates translation of…	3507798	AFUA_1G02030	CADAFUBG00000241	CADAFUBG00000241	CADAFUBP00000236	CADAFUBP00000236	CADAFUBT00000241	CADAFUBT00000241	EIF3B_ASPFU	Q4WKL7	XP_749953	XP_749953.1	afm:AFUA_1G02030	prt1
CADAFUBP00000240	746128.CADAFUBP00000240	https://smart.embl.de/smart/DDvec.cgi?smart=319:Pfam_Cytochrom_C1(86|305)+	Cytochrome C1/Cyt1, putative	3507878	AFUA_1G02070	CADAFUBG00000245	CADAFUBG00000245	CADAFUBP00000240	CADAFUBP00000240	CADAFUBT00000245	CADAFUBT00000245	Cytochrome C1/Cyt1, putative	Cytochrome C1/Cyt1, putative	Cytochrome C1/Cyt1, putative	Q4WKL3	Q4WKL3_ASPFU	XP_749957	XP_749957.1	afm:AFUA_1G02070
CADAFUBP00000252	746128.CADAFUBP00000252	https://smart.embl.de/smart/DDvec.cgi?smart=204:RAB(4|167)+	Ras GTPase Rab11, putative	3507897	AFUA_1G02190	CADAFUBG00000257	CADAFUBG00000257	CADAFUBP00000252	CADAFUBP00000252	CADAFUBT00000257	CADAFUBT00000257	Q4WKK1	Q4WKK1_ASPFU	Ras GTPase Rab11, putative	Ras GTPase Rab11, putative	Ras GTPase Rab11, putative	XP_749969	XP_749969.1	afm:AFUA_1G02190
rvb2	746128.CADAFUBP00000275	https://smart.embl.de/smart/DDvec.cgi?smart=469:AAA(68|359)+	RuvB-like helicase 2; DNA helicase which participates in several chromatin remodeling complexes, including the SWR1 and the INO80 complexes. The SWR1 complex mediates the ATP-dependent exchange of histone H2A for the H2A variant HZT1 leading to transcriptional regulation of selected genes by chromatin remodeling. The INO80 complex remodels chromatin by shifting nucleosomes and is involved in DNA …	3.6.4.12	3507931	AAA family ATPase Rvb2/Reptin, putative	AAA family ATPase Rvb2/Reptin, putative	AFUA_1G02410	CADAFUBG00000280	CADAFUBG00000280	CADAFUBP00000275	CADAFUBP00000275	CADAFUBT00000280	CADAFUBT00000280	EC 3.6.4.12	Q4WKH9	RUVB2_ASPFU	RuvB-like helicase 2	XP_749991	XP_749991.1	afm:AFUA_1G02410	rvb2
CADAFUBP00000300	746128.CADAFUBP00000300	https://smart.embl.de/smart/DDvec.cgi?smart=320:Pfam_P34-Arc(52|303)+	Arp2/3 complex 34 kDa subunit; Functions as actin-binding component of the Arp2/3 complex which is involved in regulation of actin polymerization and together with an activating nucleation-promoting factor (NPF) mediates the formation of branched actin networks	3507934	AFUA_1G02670	ARP2/3 complex 34 kDa subunit , putative	ARP2/3 complex 34 kDa subunit , putative	Arp2/3 complex 34 kDa subunit	CADAFUBG00000307	CADAFUBG00000307	CADAFUBP00000300	CADAFUBP00000300	CADAFUBT00000307	CADAFUBT00000307	Q4WKF3	Q4WKF3_ASPFU	XP_750017	XP_750017.1	afm:AFUA_1G02670
CADAFUBP00000329	746128.CADAFUBP00000329	https://smart.embl.de/smart/DDvec.cgi?smart=265:Pfam_Glucosamine_iso(12|247)+	6-phosphogluconolactonase, putative	3.1.1.31	5076907	6-phosphogluconolactonase, putative	6-phosphogluconolactonase, putative	6-phosphogluconolactonase, putative	A4D9S0	A4D9S0_ASPFU	AFUA_1G02980	CADAFUBG00000336	CADAFUBG00000336	CADAFUBP00000329	CADAFUBP00000329	CADAFUBT00000336	CADAFUBT00000336	EC 3.1.1.31	XP_001481696	XP_001481696.1	afm:AFUA_1G02980
mcr1	746128.CADAFUBP00000482	https://smart.embl.de/smart/DDvec.cgi?smart=323:Pfam_FAD_binding_6(76|176)+Pfam_NAD_binding_1(186|295)+	NADH-cytochrome b5 reductase 2; May mediate the reduction of outer membrane cytochrome b5; Belongs to the flavoprotein pyridine nucleotide cytochrome reductase family	1.6.2.2	3507287	AFUA_1G04540	CADAFUBG00000490	CADAFUBG00000490	CADAFUBP00000482	CADAFUBP00000482	CADAFUBT00000490	CADAFUBT00000490	EC 1.6.2.2	MCR1_ASPFU	Mitochondrial cytochrome b reductase	NADH-cytochrome b5 reductase 2	NADH-cytochrome b5 reductase, putative	NADH-cytochrome b5 reductase, putative	Q4WJW8	XP_750202	XP_750202.1	afm:AFUA_1G04540	mcr1
CADAFUBP00000491	746128.CADAFUBP00000491	https://smart.embl.de/smart/DDvec.cgi?smart=348:Pfam_ADH_N(32|138)+Pfam_ADH_zinc_N(177|309)+	Alcohol dehydrogenase, zinc-containing, putative	1.1.1.287	3507272	AFUA_1G04620	Alcohol dehydrogenase, zinc-containing, putative	Alcohol dehydrogenase, zinc-containing, putative	Alcohol dehydrogenase, zinc-containing, putative	CADAFUBG00000499	CADAFUBG00000499	CADAFUBP00000491	CADAFUBP00000491	CADAFUBT00000499	CADAFUBT00000499	EC 1.1.1.287	Q4WJV9	Q4WJV9_ASPFU	XP_750211	XP_750211.1	afm:AFUA_1G04620
xyl1	746128.CADAFUBP00000510	https://smart.embl.de/smart/DDvec.cgi?smart=315:Pfam_Aldo_ket_red(16|302)+	Probable NAD(P)H-dependent D-xylose reductase xyl1; Catalyzes the initial reaction in the xylose utilization pathway by reducing D-xylose into xylitol. Xylose is a major component of hemicelluloses such as xylan. Most fungi utilize D- xylose via three enzymatic reactions, xylose reductase (XR), xylitol dehydrogenase (XDH), and xylulokinase, to form xylulose 5- phosphate, which enters pentose phos…	1.1.1.307	3507406	AFUA_1G04820	CADAFUBG00000518	CADAFUBG00000518	CADAFUBP00000510	CADAFUBP00000510	CADAFUBT00000518	CADAFUBT00000518	EC 1.1.1.307	Q4WJT9	XP_750231	XP_750231.1	XYL1_ASPFU	afm:AFUA_1G04820	xyl1
NAT10	746128.CADAFUBP00000556	https://smart.embl.de/smart/DDvec.cgi?smart=1066:Pfam_DUF1726(108|202)+Pfam_Helicase_RecD(281|498)+Pfam_GNAT_acetyltr_2(540|770)+Pfam_tRNA_bind_2(778|1013)+	RNA cytidine acetyltransferase; RNA cytidine acetyltransferase with specificity toward both 18S rRNA and tRNAs. Catalyzes the formation of N(4)- acetylcytidine (ac4C) in 18S rRNA. Required for early nucleolar cleavages of precursor rRNA at sites A0, A1 and A2 during 18S rRNA synthesis. Catalyzes the formation of ac4C in serine and leucine tRNAs. Requires the tRNA-binding adapter protein TAN1 for …	18S rRNA cytosine acetyltransferase	2.3.1.-	3507529	AFUA_1G05310	CADAFUBG00000568	CADAFUBG00000568	CADAFUBP00000556	CADAFUBP00000556	CADAFUBT00000568	CADAFUBT00000568	EC 2.3.1.-	NAT10	Nucleolar ATPase Kre33, putative	Nucleolar ATPase Kre33, putative	Q4WJP0	Q4WJP0_ASPFU	RNA cytidine acetyltransferase	XP_750280	XP_750280.1	afm:AFUA_1G05310
CADAFUBP00000573	746128.CADAFUBP00000573	https://smart.embl.de/smart/DDvec.cgi?smart=1256:ANK(359|388)+ANK(392|421)+ANK(546|576)+ANK(587|617)+COIL(629|657)+COIL(943|1046)+	Histone deacetylase complex subunit (Hos4), putative	3507554	AFUA_1G05490	CADAFUBG00000585	CADAFUBG00000585	CADAFUBP00000573	CADAFUBP00000573	CADAFUBT00000585	CADAFUBT00000585	Q4WJM2	Q4WJM2_ASPFU	XP_750298	XP_750298.1	afm:AFUA_1G05490
CADAFUBP00000580	746128.CADAFUBP00000580	https://smart.embl.de/smart/DDvec.cgi?smart=387:Pfam_MMR_HSR1(86|203)+Pfam_MMR_HSR1_Xtn(206|312)+Pfam_TGS(313|382)+	GTP binding protein, putative	3507561	AFUA_1G05560	CADAFUBG00000592	CADAFUBG00000592	CADAFUBP00000580	CADAFUBP00000580	CADAFUBT00000592	CADAFUBT00000592	GTP binding protein, putative	GTP binding protein, putative	GTP binding protein, putative	Q4WJL5	Q4WJL5_ASPFU	XP_750305	XP_750305.1	afm:AFUA_1G05560
CADAFUBP00000586	746128.CADAFUBP00000586	https://smart.embl.de/smart/DDvec.cgi?smart=616:Pfam_HEAT_2(364|465)+	Protein phosphotase 2a 65kd regulatory sububit	3507568	AFUA_1G05610	CADAFUBG00000600	CADAFUBG00000600	CADAFUBP00000586	CADAFUBP00000586	CADAFUBT00000600	CADAFUBT00000600	Protein phosphotase 2a 65kd regulatory sububit	Protein phosphotase 2a 65kd regulatory sububit	Protein phosphotase 2a 65kd regulatory sububit	Q4WJL0	Q4WJL0_ASPFU	XP_750310	XP_750310.1	afm:AFUA_1G05610
CADAFUBP00000587	746128.CADAFUBP00000587	https://smart.embl.de/smart/DDvec.cgi?smart=600:B3_4(111|273)+B5(299|370)+	Phenylalanyl-tRNA synthetase, beta subunit	3507569	6.1.1.20	AFUA_1G05620	CADAFUBG00000601	CADAFUBG00000601	CADAFUBP00000587	CADAFUBP00000587	CADAFUBT00000601	CADAFUBT00000601	EC 6.1.1.20	Phenylalanyl-tRNA synthetase, beta subunit	Phenylalanyl-tRNA synthetase, beta subunit	Phenylalanyl-tRNA synthetase, beta subunit	Q4WJK9	Q4WJK9_ASPFU	XP_750311	XP_750311.1	afm:AFUA_1G05620
CADAFUBP00000705	746128.CADAFUBP00000705	https://smart.embl.de/smart/DDvec.cgi?smart=1095:Pfam_HEAT(412|442)+	Importin beta-3 subunit, putative	3507687	AFUA_1G06790	CADAFUBG00000720	CADAFUBG00000720	CADAFUBP00000705	CADAFUBP00000705	CADAFUBT00000720	CADAFUBT00000720	Importin beta-3 subunit, putative	Importin beta-3 subunit, putative	Importin beta-3 subunit, putative	Q4WJ92	Q4WJ92_ASPFU	XP_750428	XP_750428.1	afm:AFUA_1G06790
CADAFUBP00000733	746128.CADAFUBP00000733	http://smart.embl.de/smart/DDt.cgi?smart=1526:	Uncharacterized protein	3507715	AFUA_1G07090	CADAFUBG00000748	CADAFUBG00000748	CADAFUBP00000733	CADAFUBP00000733	CADAFUBT00000748	CADAFUBT00000748	Putative uncharacterized protein	Putative uncharacterized protein	Q4WJ64	Q4WJ64_ASPFU	Uncharacterized protein	XP_750456	XP_750456.1	afm:AFUA_1G07090
adk1	746128.CADAFUBP00000773	https://smart.embl.de/smart/DDvec.cgi?smart=257:COIL(4|35)+Pfam_AAA_17(48|184)+	Adenylate kinase; Catalyzes the reversible transfer of the terminal phosphate group between ATP and AMP. Plays an important role in cellular energy homeostasis and in adenine nucleotide metabolism. Adenylate kinase activity is critical for regulation of the phosphate utilization and the AMP de novo biosynthesis pathways	2.7.4.3	3507758	AFUA_1G07530	ATP-AMP transphosphorylase	ATP:AMP phosphotransferase	Adenylate kinase	Adenylate kinase	Adenylate kinase	Adenylate kinase cytosolic and mitochondrial	Adenylate monophosphate kinase	CADAFUBG00000788	CADAFUBG00000788	CADAFUBP00000773	CADAFUBP00000773	CADAFUBT00000788	CADAFUBT00000788	EC 2.7.4.3	KAD2_ASPFU	Q4WJ21	XP_750499	XP_750499.1	adk1	afm:AFUA_1G07530
CADAFUBP00000802	746128.CADAFUBP00000802	https://smart.embl.de/smart/DDvec.cgi?smart=1101:IBN_N(55|121)+Pfam_Xpo1(132|277)+CRM1_C(735|1058)+COIL(1059|1084)+	Exportin KapK	3509775	AFUA_1G08790	CADAFUBG00000817	CADAFUBG00000817	CADAFUBP00000802	CADAFUBP00000802	CADAFUBT00000817	CADAFUBT00000817	Exportin KapK	Exportin KapK	Exportin KapK	Q4WTM4	Q4WTM4_ASPFU	XP_752246	XP_752246.1	afm:AFUA_1G08790
CADAFUBP00000809	746128.CADAFUBP00000809	https://smart.embl.de/smart/DDvec.cgi?smart=228:GuKc(36|222)+	Guanylate kinase	2.7.4.8	3510199	AFUA_1G08840	CADAFUBG00000829	CADAFUBG00000829	CADAFUBP00000809	CADAFUBP00000809	CADAFUBT00000829	CADAFUBT00000829	EC 2.7.4.8	Guanylate kinase	Guanylate kinase	Guanylate kinase	Q4WTL9	Q4WTL9_ASPFU	XP_752251	XP_752251.1	afm:AFUA_1G08840
CADAFUBP00000810	746128.CADAFUBP00000810	https://smart.embl.de/smart/DDvec.cgi?smart=346:Pfam_MMR_HSR1(42|250)+	Septin; Belongs to the TRAFAC class TrmE-Era-EngA-EngB-Septin- like GTPase superfamily. Septin GTPase family	3510200	AFUA_1G08850	CADAFUBG00000830	CADAFUBG00000830	CADAFUBP00000810	CADAFUBP00000810	CADAFUBT00000830	CADAFUBT00000830	Q4WTL8	Q4WTL8_ASPFU	Septin	Septin	Septin	XP_752252	XP_752252.1	afm:AFUA_1G08850
CADAFUBP00000827	746128.CADAFUBP00000827	https://smart.embl.de/smart/DDvec.cgi?smart=651:Pfam_tRNA-synt_1g(16|408)+COIL(572|609)+	Methionyl-tRNA synthetase; Belongs to the class-I aminoacyl-tRNA synthetase family	3510467	6.1.1.10	AFUA_1G09010	CADAFUBG00000847	CADAFUBG00000847	CADAFUBP00000827	CADAFUBP00000827	CADAFUBT00000847	CADAFUBT00000847	EC 6.1.1.10	Methionyl-tRNA synthetase	Methionyl-tRNA synthetase	Methionyl-tRNA synthetase	Q4WTK2	Q4WTK2_ASPFU	XP_752268	XP_752268.1	afm:AFUA_1G09010
CADAFUBP00000859	746128.CADAFUBP00000859	https://smart.embl.de/smart/DDvec.cgi?smart=345:JAB_MPN(29|165)+Pfam_MitMem_reg(189|301)+	Eukaryotic translation initiation factor 3 subunit F; Component of the eukaryotic translation initiation factor 3 (eIF-3) complex, which is involved in protein synthesis of a specialized repertoire of mRNAs and, together with other initiation factors, stimulates binding of mRNA and methionyl-tRNAi to the 40S ribosome. The eIF-3 complex specifically targets and initiates translation of a subset of…	3510211	AFUA_1G09330	CADAFUBG00000879	CADAFUBG00000879	CADAFUBP00000859	CADAFUBP00000859	CADAFUBT00000879	CADAFUBT00000879	EIF3F_ASPFU	Q4WTH0	XP_752300	XP_752300.1	afm:AFUA_1G09330
CADAFUBP00000873	746128.CADAFUBP00000873	https://smart.embl.de/smart/DDvec.cgi?smart=386:Pfam_Aminotran_1_2(23|347)+	Aminotransferase, class V, putative	2.6.1.44	2.6.1.45	2.6.1.51	3510227	AFUA_1G09470	Aminotransferase, class V, putative	Aminotransferase, class V, putative	Aminotransferase, class V, putative	CADAFUBG00000896	CADAFUBG00000896	CADAFUBP00000873	CADAFUBP00000873	CADAFUBT00000896	CADAFUBT00000896	EC 2.6.1.44	EC 2.6.1.45	EC 2.6.1.51	Q4WTF6	Q4WTF6_ASPFU	XP_752314	XP_752314.1	afm:AFUA_1G09470
CADAFUBP00000907	746128.CADAFUBP00000907	https://smart.embl.de/smart/DDvec.cgi?smart=394:Pfam_MMR_HSR1(22|180)+Pfam_YchF-GTPase_C(307|390)+	Obg-like ATPase 1; Hydrolyzes ATP, and can also hydrolyze GTP with lower efficiency. Has lower affinity for GTP	3510469	AFUA_1G09800	CADAFUBG00000930	CADAFUBG00000930	CADAFUBP00000907	CADAFUBP00000907	CADAFUBT00000930	CADAFUBT00000930	GTP-binding protein YchF	GTP-binding protein YchF	Obg-like ATPase 1	Q4WTC3	Q4WTC3_ASPFU	XP_752347	XP_752347.1	afm:AFUA_1G09800
CADAFUBP00000910	746128.CADAFUBP00000910	https://smart.embl.de/smart/DDvec.cgi?smart=341:Pfam_SGTA_dimer(13|78)+TPR(114|147)+TPR(148|181)+TPR(182|215)+STI1(278|317)+	Hsc70 cochaperone (SGT), putative	3510472	3SZ7	AFUA_1G09830	CADAFUBG00000933	CADAFUBG00000933	CADAFUBP00000910	CADAFUBP00000910	CADAFUBT00000933	CADAFUBT00000933	Hsc70 cochaperone (SGT), putative	Hsc70 cochaperone (SGT), putative	Hsc70 cochaperone (SGT), putative	Q4WTC0	Q4WTC0_ASPFU	XP_752350	XP_752350.1	afm:AFUA_1G09830
CADAFUBP00000911	746128.CADAFUBP00000911	https://smart.embl.de/smart/DDvec.cgi?smart=523:Tim44(363|517)+	Mitochondrial import inner membrane translocase subunit TIM44; Essential component of the PAM complex, a complex required for the translocation of transit peptide-containing proteins from the inner membrane into the mitochondrial matrix in an ATP-dependent manner	3510473	AFUA_1G09840	CADAFUBG00000934	CADAFUBG00000934	CADAFUBP00000911	CADAFUBP00000911	CADAFUBT00000934	CADAFUBT00000934	Q4WTB9	Q4WTB9_ASPFU	XP_752351	XP_752351.1	afm:AFUA_1G09840
CADAFUBP00000919	746128.CADAFUBP00000919	https://smart.embl.de/smart/DDvec.cgi?smart=298:Pfam_Aldo_ket_red(21|277)+	Glycerol dehydrogenase Gcy1, putative	3510582	AFUA_1G09930	CADAFUBG00000942	CADAFUBG00000942	CADAFUBP00000919	CADAFUBP00000919	CADAFUBT00000942	CADAFUBT00000942	Glycerol dehydrogenase Gcy1, putative	Glycerol dehydrogenase Gcy1, putative	Glycerol dehydrogenase Gcy1, putative	Q4WTB0	Q4WTB0_ASPFU	XP_752360	XP_752360.1	afm:AFUA_1G09930
CADAFUBP00000923	746128.CADAFUBP00000923	https://smart.embl.de/smart/DDvec.cgi?smart=365:JAB_MPN(10|159)+	Eukaryotic translation initiation factor 3 subunit H; Component of the eukaryotic translation initiation factor 3 (eIF-3) complex, which is involved in protein synthesis of a specialized repertoire of mRNAs and, together with other initiation factors, stimulates binding of mRNA and methionyl-tRNAi to the 40S ribosome. The eIF-3 complex specifically targets and initiates translation of a subset of…	3510586	AFUA_1G09970	CADAFUBG00000946	CADAFUBG00000946	CADAFUBP00000923	CADAFUBP00000923	CADAFUBT00000946	CADAFUBT00000946	EIF3H_ASPFU	Q4WTA6	XP_752364	XP_752364.1	afm:AFUA_1G09970
CADAFUBP00000954	746128.CADAFUBP00000954	https://smart.embl.de/smart/DDvec.cgi?smart=703:Pfam_RLI(20|55)+Pfam_Fer4(66|89)+AAA(120|315)+AAA(392|561)+	RNase L inhibitor of the ABC superfamily, putative	3510680	AFUA_1G10310	CADAFUBG00000977	CADAFUBG00000977	CADAFUBP00000954	CADAFUBP00000954	CADAFUBT00000977	CADAFUBT00000977	Q4WT73	Q4WT73_ASPFU	XP_752397	XP_752397.1	afm:AFUA_1G10310
CADAFUBP00001004	746128.CADAFUBP00001004	https://smart.embl.de/smart/DDvec.cgi?smart=391:Pfam_V-ATPase_C(7|384)+	V-type proton ATPase subunit C; Subunit of the peripheral V1 complex of vacuolar ATPase. Subunit C is necessary for the assembly of the catalytic sector of the enzyme and is likely to have a specific function in its catalytic activity. V-ATPase is responsible for acidifying a variety of intracellular compartments in eukaryotic cells	3510511	AFUA_1G10810	CADAFUBG00001028	CADAFUBG00001028	CADAFUBP00001004	CADAFUBP00001004	CADAFUBT00001028	CADAFUBT00001028	Q4WT24	Q4WT24_ASPFU	V-type proton ATPase subunit C	Vacuolar ATP synthase subunit c	Vacuolar ATP synthase subunit c	XP_752446	XP_752446.1	afm:AFUA_1G10810
CADAFUBP00001020	746128.CADAFUBP00001020	https://smart.embl.de/smart/DDvec.cgi?smart=955:Pfam_Cnd1(115|259)+COIL(650|678)+Pfam_Coatamer_beta_C(679|815)+Pfam_Coatomer_b_Cpla(820|947)+	Coatomer subunit beta; The coatomer is a cytosolic protein complex that binds to dilysine motifs and reversibly associates with Golgi non- clathrin-coated vesicles, which further mediate biosynthetic protein transport from the ER, via the Golgi up to the trans Golgi network. Coatomer complex is required for budding from Golgi membranes, and is essential for the retrograde Golgi-to-ER transport of…	3510482	AFUA_1G10970	Beta-coat protein	CADAFUBG00001044	CADAFUBG00001044	CADAFUBP00001020	CADAFUBP00001020	CADAFUBT00001044	CADAFUBT00001044	Coatomer subunit beta	Coatomer subunit beta	Coatomer subunit beta	Q4WT08	Q4WT08_ASPFU	XP_752462	XP_752462.1	afm:AFUA_1G10970
CADAFUBP00001065	746128.CADAFUBP00001065	https://smart.embl.de/smart/DDvec.cgi?smart=1378:Pfam_Rrp44_CSD1(428|564)+RNB(759|1092)+COIL(1214|1247)+	Cell wall biogenesis protein phosphatase Ssd1, putative	3510181	AFUA_1G11420	CADAFUBG00001090	CADAFUBG00001090	CADAFUBP00001065	CADAFUBP00001065	CADAFUBT00001090	CADAFUBT00001090	Q4WSW3	Q4WSW3_ASPFU	XP_752507	XP_752507.1	afm:AFUA_1G11420
CADAFUBP00001071	746128.CADAFUBP00001071	https://smart.embl.de/smart/DDvec.cgi?smart=187:Pfam_DUF3237(5|184)+	Uncharacterized protein	3510187	AFUA_1G11480	CADAFUBG00001096	CADAFUBG00001096	CADAFUBP00001071	CADAFUBP00001071	CADAFUBT00001096	CADAFUBT00001096	Putative uncharacterized protein	Putative uncharacterized protein	Q4WSV7	Q4WSV7_ASPFU	Uncharacterized protein	XP_752513	XP_752513.1	afm:AFUA_1G11480
CADAFUBP00001092	746128.CADAFUBP00001092	https://smart.embl.de/smart/DDvec.cgi?smart=455:WH2(38|55)+	Proline-rich, actin-associated protein Vrp1, putative; Conserved proline-rich protein	3510232	AFUA_1G11690	CADAFUBG00001117	CADAFUBG00001117	CADAFUBP00001092	CADAFUBP00001092	CADAFUBT00001117	CADAFUBT00001117	Conserved proline-rich protein	Conserved proline-rich protein	Q4WST6	Q4WST6_ASPFU	XP_752534	XP_752534.1	afm:AFUA_1G11690
CADAFUBP00001210	746128.CADAFUBP00001210	https://smart.embl.de/smart/DDvec.cgi?smart=1102:Pfam_Pyr_redox_2(44|347)+Pfam_Fer2_BFD(498|548)+Pfam_NIR_SIR_ferr(637|702)+Pfam_NIR_SIR(710|854)+Pfam_Rieske(931|1030)+	Nitrite reductase NiiA	1.7.1.4	3510300	AFUA_1G12840	CADAFUBG00001236	CADAFUBG00001236	CADAFUBP00001210	CADAFUBP00001210	CADAFUBT00001236	CADAFUBT00001236	E9R4B8	E9R4B8_ASPFU	EC 1.7.1.4	Nitrite reductase NiiA	Nitrite reductase NiiA	Nitrite reductase NiiA	XP_752654	XP_752654.1	afm:AFUA_1G12840
hog1	746128.CADAFUBP00001221	https://smart.embl.de/smart/DDvec.cgi?smart=366:S_TKc(20|299)+	Mitogen-activated protein kinase hog1; Mitogen-activated protein kinase involved in a signal transduction pathway that is activated by changes in the osmolarity of the extracellular environment. Controls osmotic regulation of transcription of target genes (By similarity)	2.7.11.24	3510276	AFUA_1G12940	AfA5C11.10	CADAFUBG00001247	CADAFUBG00001247	CADAFUBP00001221	CADAFUBP00001221	CADAFUBT00001247	CADAFUBT00001247	EC 2.7.11.24	HOG1_ASPFU	MAP kinase SakA	MAP kinase SakA	Mitogen-activated protein kinase hog1	Q4WSF6	Q6MYJ4	Q8TFX5	XP_752664	XP_752664.1	afm:AFUA_1G12940	hog1	hogA	osm1	sakA
CADAFUBP00001236	746128.CADAFUBP00001236	https://smart.embl.de/smart/DDvec.cgi?smart=764:Pfam_GATase(27|218)+Pfam_IGPS(250|512)+Pfam_PRAI(564|758)+	Multifunctional tryptophan biosynthesis protein; Trifunctional enzyme bearing the Gln amidotransferase (GATase) domain of anthranilate synthase, indole-glycerolphosphate synthase, and phosphoribosylanthranilate isomerase activities	3510688	4.1.1.48	4.1.3.27	5.3.1.24	AFUA_1G13090	CADAFUBG00001262	CADAFUBG00001262	CADAFUBP00001236	CADAFUBP00001236	CADAFUBT00001262	CADAFUBT00001262	E9R6J7	E9R6J7_ASPFU	EC 4.1.1.48	EC 4.1.3.27	EC 5.3.1.24	Multifunctional tryptophan biosynthesis protein	XP_752679	XP_752679.1	afm:AFUA_1G13090
CADAFUBP00001299	746128.CADAFUBP00001299	https://smart.embl.de/smart/DDvec.cgi?smart=1064:Pfam_tRNA-synt_1g(40|191)+Pfam_Anticodon_1(691|848)+	Isoleucyl-tRNA synthetase ,cytoplasmic; Belongs to the class-I aminoacyl-tRNA synthetase family	3510088	6.1.1.5	AFUA_1G13710	CADAFUBG00001325	CADAFUBG00001325	CADAFUBP00001299	CADAFUBP00001299	CADAFUBT00001325	CADAFUBT00001325	E9QWI4	E9QWI4_ASPFU	EC 6.1.1.5	Isoleucyl-tRNA synthetase ,cytoplasmic	Isoleucyl-tRNA synthetase ,cytoplasmic	Isoleucyl-tRNA synthetase, cytoplasmic	XP_752741	XP_752741.1	afm:AFUA_1G13710
aroM	746128.CADAFUBP00001302	https://smart.embl.de/smart/DDvec.cgi?smart=1605:Pfam_DHQ_synthase(74|359)+Pfam_EPSP_synthase(398|836)+Pfam_SKI(873|1036)+Pfam_DHquinase_I(1053|1281)+Pfam_Shikimate_dh_N(1294|1374)+	Pentafunctional AROM polypeptide; The AROM polypeptide catalyzes 5 consecutive enzymatic reactions in prechorismate polyaromatic amino acid biosynthesis; In the C-terminal section; belongs to the shikimate dehydrogenase family	1.1.1.25	2.5.1.19	2.7.1.71	3510194	4.2.1.10	4.2.3.4	AFUA_1G13740	ARO1_ASPFU	AfA35g10.13	CADAFUBG00001328	CADAFUBG00001328	CADAFUBP00001302	CADAFUBP00001302	CADAFUBT00001328	CADAFUBT00001328	EC 1.1.1.25	EC 2.5.1.19	EC 2.7.1.71	EC 4.2.1.10	EC 4.2.3.4	Pentafunctional AROM polypeptide	Q4WS76	Q8TFZ0	XP_752744	XP_752744.1	afm:AFUA_1G13740	aroM
CADAFUBP00001339	746128.CADAFUBP00001339	https://smart.embl.de/smart/DDvec.cgi?smart=510:COIL(21|54)+COIL(118|291)+COIL(425|507)+	Nuclear segregation protein (Bfr1), putative	3509792	AFUA_1G14120	CADAFUBG00001371	CADAFUBG00001371	CADAFUBP00001339	CADAFUBP00001339	CADAFUBT00001371	CADAFUBT00001371	E9QRL5	E9QRL5_ASPFU	Nuclear segregation protein (Bfr1), putative	Nuclear segregation protein (Bfr1), putative	Nuclear segregation protein (Bfr1), putative	XP_752782	XP_752782.1	afm:AFUA_1G14120
CADAFUBP00001427	746128.CADAFUBP00001427	https://smart.embl.de/smart/DDvec.cgi?smart=643:Pfam_HMGL-like(32|317)+LeuA_dimer(431|579)+	2-isopropylmalate synthase	2-isopropylmalate synthase	2-isopropylmalate synthase	2-isopropylmalate synthase	2.3.3.13	3509892	AFUA_1G15000	CADAFUBG00001461	CADAFUBG00001461	CADAFUBP00001427	CADAFUBP00001427	CADAFUBT00001461	CADAFUBT00001461	EC 2.3.3.13	Q4WRV1	Q4WRV1_ASPFU	XP_752869	XP_752869.1	afm:AFUA_1G15000
CADAFUBP00001470	746128.CADAFUBP00001470	https://smart.embl.de/smart/DDvec.cgi?smart=424:Adenylsucc_synt(3|422)+	Adenylosuccinate synthetase; Plays an important role in the de novo pathway and in the salvage pathway of purine nucleotide biosynthesis. Catalyzes the first committed step in the biosynthesis of AMP from IMP (By similarity); Belongs to the adenylosuccinate synthetase family	3509937	6.3.4.4	AFUA_1G15450	Adenylosuccinate synthetase	Adenylosuccinate synthetase	Adenylosuccinate synthetase	CADAFUBG00001505	CADAFUBG00001505	CADAFUBP00001470	CADAFUBP00001470	CADAFUBT00001505	CADAFUBT00001505	EC 6.3.4.4	IMP--aspartate ligase	PURA_ASPFU	Q4WRQ7	XP_752913	XP_752913.1	afm:AFUA_1G15450
CADAFUBP00001509	746128.CADAFUBP00001509	https://smart.embl.de/smart/DDvec.cgi?smart=591:Pfam_Clat_adaptor_s(75|214)+Pfam_Adap_comp_sub(339|591)+	Coatomer subunit delta, putative; Belongs to the adaptor complexes medium subunit family	3509976	AFUA_1G15860	CADAFUBG00001544	CADAFUBG00001544	CADAFUBP00001509	CADAFUBP00001509	CADAFUBT00001544	CADAFUBT00001544	Coatomer subunit delta, putative	Coatomer subunit delta, putative	Coatomer subunit delta, putative	Q4WRL8	Q4WRL8_ASPFU	XP_752952	XP_752952.1	afm:AFUA_1G15860
CADAFUBP00001519	746128.CADAFUBP00001519	https://smart.embl.de/smart/DDvec.cgi?smart=472:Pfam_Pyr_redox_3(125|318)+Pfam_Pyr_redox_dim(357|472)+	Glutathione oxidoreductase Glr1, putative; Glutathione reductase; Belongs to the class-I pyridine nucleotide-disulfide oxidoreductase family	1.8.1.7	3509986	AFUA_1G15960	CADAFUBG00001554	CADAFUBG00001554	CADAFUBP00001519	CADAFUBP00001519	CADAFUBT00001554	CADAFUBT00001554	EC 1.8.1.7	Glutathione oxidoreductase Glr1, putative	Glutathione reductase	Glutathione reductase	Q4WRK8	Q4WRK8_ASPFU	XP_752962	XP_752962.1	afm:AFUA_1G15960
CADAFUBP00001765	746128.CADAFUBP00001765	https://smart.embl.de/smart/DDvec.cgi?smart=534:Pfam_Inos-1-P_synth(332|445)+	Myo-inositol-phosphate synthase, putative	3506850	5.5.1.4	AFUA_2G01010	CADAFUBG00001804	CADAFUBG00001804	CADAFUBP00001765	CADAFUBP00001765	CADAFUBT00001804	CADAFUBT00001804	EC 5.5.1.4	Myo-inositol-phosphate synthase, putative	Myo-inositol-phosphate synthase, putative	Myo-inositol-phosphate synthase, putative	Q4WIQ6	Q4WIQ6_ASPFU	XP_749237	XP_749237.1	afm:AFUA_2G01010
CADAFUBP00001767	746128.CADAFUBP00001767	https://smart.embl.de/smart/DDvec.cgi?smart=379:Pfam_ADH_N(35|163)+Pfam_ADH_zinc_N(205|339)+	Formaldehyde dehydrogenase; Belongs to the zinc-containing alcohol dehydrogenase family. Class-III subfamily	1.1.1.1	1.1.1.284	3506853	AFUA_2G01040	CADAFUBG00001806	CADAFUBG00001806	CADAFUBP00001767	CADAFUBP00001767	CADAFUBT00001806	CADAFUBT00001806	EC 1.1.1.1	EC 1.1.1.284	Formaldehyde dehydrogenase	Formaldehyde dehydrogenase	Q4WIQ3	Q4WIQ3_ASPFU	S-(hydroxymethyl)glutathione dehydrogenase	XP_749240	XP_749240.1	afm:AFUA_2G01040
CADAFUBP00001854	746128.CADAFUBP00001854	https://smart.embl.de/smart/DDvec.cgi?smart=664:Pfam_tRNA-synt_1c(110|426)+Pfam_tRNA-synt_1c_C(428|611)+	Glutaminyl-tRNA synthetase; Belongs to the class-I aminoacyl-tRNA synthetase family	3506943	6.1.1.18	AFUA_2G01920	CADAFUBG00001895	CADAFUBG00001895	CADAFUBP00001854	CADAFUBP00001854	CADAFUBT00001895	CADAFUBT00001895	EC 6.1.1.18	Glutaminyl-tRNA synthetase	Glutaminyl-tRNA synthetase	Glutaminyl-tRNA synthetase	Q4WIG6	Q4WIG6_ASPFU	XP_749327	XP_749327.1	afm:AFUA_2G01920
cpr6	746128.CADAFUBP00001866	https://smart.embl.de/smart/DDvec.cgi?smart=377:Pfam_Pro_isomerase(11|178)+Pfam_TPR_1(314|347)+	Peptidyl-prolyl cis-trans isomerase D; PPIases accelerate the folding of proteins. It catalyzes the cis-trans isomerization of proline imidic peptide bonds in oligopeptides (By similarity)	3507112	5.2.1.8	AFUA_2G02050	CADAFUBG00001907	CADAFUBG00001907	CADAFUBP00001866	CADAFUBP00001866	CADAFUBT00001907	CADAFUBT00001907	EC 5.2.1.8	PPID_ASPFU	Peptidyl-prolyl cis-trans isomerase D	Q4WIF3	Rotamase D	XP_749340	XP_749340.1	afm:AFUA_2G02050	cpr6
CADAFUBP00001876	746128.CADAFUBP00001876	https://smart.embl.de/smart/DDvec.cgi?smart=116:Pfam_Ribosomal_S10(20|113)+	40S ribosomal protein S10a	3507137	40S ribosomal protein S10a	40S ribosomal protein S10a	40S ribosomal protein S10a	AFUA_2G02150	CADAFUBG00001917	CADAFUBG00001917	CADAFUBP00001876	CADAFUBP00001876	CADAFUBT00001917	CADAFUBT00001917	Q4WIE3	Q4WIE3_ASPFU	XP_749350	XP_749350.1	afm:AFUA_2G02150
CADAFUBP00001894	746128.CADAFUBP00001894	https://smart.embl.de/smart/DDvec.cgi?smart=570:Pfam_MreB_Mbl(122|383)+	Hsp70 chaperone (BiP), putative; Belongs to the heat shock protein 70 family	3507089	AFUA_2G02320	CADAFUBG00001935	CADAFUBG00001935	CADAFUBP00001894	CADAFUBP00001894	CADAFUBT00001935	CADAFUBT00001935	Hsp70 chaperone (BiP), putative	Hsp70 chaperone (BiP), putative	Hsp70 chaperone (BiP), putative	Q4WIC6	Q4WIC6_ASPFU	XP_749367	XP_749367.1	afm:AFUA_2G02320
CADAFUBP00001919	746128.CADAFUBP00001919	https://smart.embl.de/smart/DDvec.cgi?smart=916:Pfam_HEAT_2(453|552)+Pfam_COP-gamma_platf(650|799)+Pfam_Coatomer_g_Cpla(801|915)+	Coatomer subunit gamma; The coatomer is a cytosolic protein complex that binds to dilysine motifs and reversibly associates with Golgi non- clathrin-coated vesicles, which further mediate biosynthetic protein transport from the ER, via the Golgi up to the trans Golgi network. Coatomer complex is required for budding from Golgi membranes, and is essential for the retrograde Golgi-to-ER transport o…	3506626	AFUA_2G02560	CADAFUBG00001960	CADAFUBG00001960	CADAFUBP00001919	CADAFUBP00001919	CADAFUBT00001960	CADAFUBT00001960	Coatomer subunit gamma	Coatomer subunit gamma	Coatomer subunit gamma	Q4WIA2	Q4WIA2_ASPFU	XP_749391	XP_749391.1	afm:AFUA_2G02560
CADAFUBP00001922	746128.CADAFUBP00001922	https://smart.embl.de/smart/DDvec.cgi?smart=555:COIL(29|69)+Pfam_tRNA_anti-codon(97|183)+Pfam_tRNA-synt_2(220|550)+	Aspartyl-tRNA synthetase Dps1, putative	3506882	6.1.1.12	AFUA_2G02590	Aspartyl-tRNA synthetase Dps1, putative	Aspartyl-tRNA synthetase Dps1, putative	Aspartyl-tRNA synthetase Dps1, putative	CADAFUBG00001963	CADAFUBG00001963	CADAFUBP00001922	CADAFUBP00001922	CADAFUBT00001963	CADAFUBT00001963	EC 6.1.1.12	Q4WI99	Q4WI99_ASPFU	XP_749394	XP_749394.1	afm:AFUA_2G02590
CADAFUBP00001973	746128.CADAFUBP00001973	https://smart.embl.de/smart/DDvec.cgi?smart=165:Pfam_PMSR(7|162)+	Peptide methionine sulfoxide reductase	1.8.4.11	3506823	AFUA_2G03140	CADAFUBG00002014	CADAFUBG00002014	CADAFUBP00001973	CADAFUBP00001973	CADAFUBT00002014	CADAFUBT00002014	EC 1.8.4.11	Peptide methionine sulfoxide reductase	Peptide methionine sulfoxide reductase	Peptide methionine sulfoxide reductase	Q4WI44	Q4WI44_ASPFU	XP_749449	XP_749449.1	afm:AFUA_2G03140
CADAFUBP00002015	746128.CADAFUBP00002015	https://smart.embl.de/smart/DDvec.cgi?smart=518:Pfam_tRNA-synt_2d(204|510)+	Phenylalanyl-tRNA synthetase beta chain cytoplasmic	3507217	6.1.1.20	AFUA_2G03580	CADAFUBG00002060	CADAFUBG00002060	CADAFUBP00002015	CADAFUBP00002015	CADAFUBT00002060	CADAFUBT00002060	EC 6.1.1.20	Q4WI02	Q4WI02_ASPFU	XP_749491	XP_749491.1	afm:AFUA_2G03580
rps21	746128.CADAFUBP00002016	https://smart.embl.de/smart/DDvec.cgi?smart=88:Pfam_Ribosomal_S21e(1|79)+	40S ribosomal protein S21; Required for the processing of the 20S rRNA-precursor to mature 18S rRNA in a late step of the maturation of 40S ribosomal subunits. Has a physiological role leading to 18S rRNA stability (By similarity)	3507218	40S ribosomal protein S21	40S ribosomal protein S21	40S ribosomal protein S21	AFUA_2G03590	CADAFUBG00002061	CADAFUBG00002061	CADAFUBP00002016	CADAFUBP00002016	CADAFUBT00002061	CADAFUBT00002061	Q4WI01	RS21_ASPFU	XP_749492	XP_749492.1	afm:AFUA_2G03590	rps21
CADAFUBP00002057	746128.CADAFUBP00002057	https://smart.embl.de/smart/DDvec.cgi?smart=479:Pfam_Glyco_transf_20(11|476)+	Alpha,alpha-trehalose-phosphate synthase subunit, putative	2.4.1.15	2.4.1.347	3506931	5HVO	AFUA_2G04010	CADAFUBG00002102	CADAFUBG00002102	CADAFUBP00002057	CADAFUBP00002057	CADAFUBT00002102	CADAFUBT00002102	EC 2.4.1.15	EC 2.4.1.347	Q4WHW0	Q4WHW0_ASPFU	Trehalose-6-phosphate synthase	UDP-glucose-glucosephosphate glucosyltransferase	XP_749533	XP_749533.1	afm:AFUA_2G04010
CADAFUBP00002122	746128.CADAFUBP00002122	https://smart.embl.de/smart/DDvec.cgi?smart=1310:KH(218|296)+KH(300|389)+KH(394|462)+KH(718|781)+KH(785|880)+KH(885|958)+KH(962|1038)+KH(1042|1110)+KH(1111|1228)+KH(1233|1302)+	RNA binding effector protein Scp160, putative	3506661	AFUA_2G04700	CADAFUBG00002167	CADAFUBG00002167	CADAFUBP00002122	CADAFUBP00002122	CADAFUBT00002167	CADAFUBT00002167	Q4WHP1	Q4WHP1_ASPFU	RNA binding effector protein Scp160, putative	RNA binding effector protein Scp160, putative	RNA binding effector protein Scp160, putative	XP_749602	XP_749602.1	afm:AFUA_2G04700
CADAFUBP00002132	746128.CADAFUBP00002132	https://smart.embl.de/smart/DDvec.cgi?smart=716:Pfam_GTP_EFTU(275|557)+Pfam_GTP_EFTU_D3(599|711)+	Translation release factor eRF3, putative	3506769	AFUA_2G04820	CADAFUBG00002179	CADAFUBG00002179	CADAFUBP00002132	CADAFUBP00002132	CADAFUBT00002179	CADAFUBT00002179	Q4WHN0	Q4WHN0_ASPFU	Translation release factor eRF3, putative	Translation release factor eRF3, putative	Translation release factor eRF3, putative	XP_749613	XP_749613.2	afm:AFUA_2G04820
CADAFUBP00002215	746128.CADAFUBP00002215	https://smart.embl.de/smart/DDvec.cgi?smart=574:COIL(79|115)+Pfam_tRNA_anti-codon(152|231)+Pfam_tRNA-synt_2(250|569)+	Cytoplasmic asparaginyl-tRNA synthetase, putative	3506760	6.1.1.22	AFUA_2G05650	CADAFUBG00002262	CADAFUBG00002262	CADAFUBP00002215	CADAFUBP00002215	CADAFUBT00002262	CADAFUBT00002262	EC 6.1.1.22	Q4WHE9	Q4WHE9_ASPFU	XP_749694	XP_749694.1	afm:AFUA_2G05650
CADAFUBP00002245	746128.CADAFUBP00002245	https://smart.embl.de/smart/DDvec.cgi?smart=126:Pfam_RNase_P_pop3(3|126)+	SnRNP and snoRNP protein (Snu13), putative	3506874	AFUA_2G05950	CADAFUBG00002293	CADAFUBG00002293	CADAFUBP00002245	CADAFUBP00002245	CADAFUBT00002293	CADAFUBT00002293	Q4WHB9	Q4WHB9_ASPFU	SnRNP and snoRNP protein (Snu13), putative	SnRNP and snoRNP protein (Snu13), putative	SnRNP and snoRNP protein (Snu13), putative	XP_749724	XP_749724.1	afm:AFUA_2G05950
CADAFUBP00002251	746128.CADAFUBP00002251	https://smart.embl.de/smart/DDvec.cgi?smart=1093:ELFV_dehydrog(727|991)+	NAD-specific glutamate dehydrogenase; NAD(+)-dependent glutamate dehydrogenase which degrades glutamate to ammonia and alpha-ketoglutarate	1.4.1.2	3506954	AFUA_2G06000	CADAFUBG00002302	CADAFUBG00002302	CADAFUBP00002251	CADAFUBP00002251	CADAFUBT00002302	CADAFUBT00002302	EC 1.4.1.2	NAD+ dependent glutamate dehydrogenase, putative	NAD+ dependent glutamate dehydrogenase, putative	NAD-specific glutamate dehydrogenase	Q4WHB4	Q4WHB4_ASPFU	XP_749729	XP_749729.1	afm:AFUA_2G06000
CADAFUBP00002266	746128.CADAFUBP00002266	https://smart.embl.de/smart/DDvec.cgi?smart=517:Pfam_Thioredoxin(29|132)+Pfam_Thioredoxin_6(160|341)+Pfam_Thioredoxin(363|469)+	Protein disulfide isomerase Pdi1, putative	3506647	5.3.4.1	AFUA_2G06150	CADAFUBG00002317	CADAFUBG00002317	CADAFUBP00002266	CADAFUBP00002266	CADAFUBT00002317	CADAFUBT00002317	EC 5.3.4.1	Protein disulfide isomerase Pdi1, putative	Protein disulfide isomerase Pdi1, putative	Protein disulfide-isomerase	Q4WH99	Q4WH99_ASPFU	XP_749744	XP_749744.1	afm:AFUA_2G06150
CADAFUBP00002290	746128.CADAFUBP00002290	https://smart.embl.de/smart/DDvec.cgi?smart=646:EFh(20|48)+EFh(55|83)+CH(139|256)+CH(288|387)+CH(412|518)+CH(537|641)+	Actin-bundling protein Sac6, putative	3513102	AFUA_2G07420	Actin-bundling protein Sac6, putative	Actin-bundling protein Sac6, putative	Actin-bundling protein Sac6, putative	CADAFUBG00002341	CADAFUBG00002341	CADAFUBP00002290	CADAFUBP00002290	CADAFUBT00002341	CADAFUBT00002341	Q4X275	Q4X275_ASPFU	XP_755078	XP_755078.1	afm:AFUA_2G07420
CADAFUBP00002300	746128.CADAFUBP00002300	https://smart.embl.de/smart/DDvec.cgi?smart=614:Pfam_Peptidase_M1(218|451)+Leuk-A4-hydro_C(466|608)+	Leukotriene A-4 hydrolase homolog; Aminopeptidase that preferentially cleaves tripeptides. Also has low epoxide hydrolase activity (in vitro). Can hydrolyze an epoxide moiety of LTA(4) to form LTB(4) (in vitro) (By similarity)	3.3.2.6	3513337	AFUA_2G07520	CADAFUBG00002351	CADAFUBG00002351	CADAFUBP00002300	CADAFUBP00002300	CADAFUBT00002351	CADAFUBT00002351	EC 3.3.2.6	LKHA4_ASPFU	Leukotriene A(4) hydrolase	Leukotriene A-4 hydrolase homolog	Leukotriene A4 hydrolase	Leukotriene A4 hydrolase	Q4X265	XP_755088	XP_755088.1	afm:AFUA_2G07520
CADAFUBP00002309	746128.CADAFUBP00002309	https://smart.embl.de/smart/DDvec.cgi?smart=534:Pfam_PALP(17|316)+CBS(372|421)+	Cystathionine beta-synthase, putative; Belongs to the cysteine synthase/cystathionine beta- synthase family	3513080	4.2.1.22	AFUA_2G07620	CADAFUBG00002360	CADAFUBG00002360	CADAFUBP00002309	CADAFUBP00002309	CADAFUBT00002360	CADAFUBT00002360	Cystathionine beta-synthase	Cystathionine beta-synthase, putative	Cystathionine beta-synthase, putative	EC 4.2.1.22	Q4X256	Q4X256_ASPFU	XP_755097	XP_755097.1	afm:AFUA_2G07620
CADAFUBP00002341	746128.CADAFUBP00002341	https://smart.embl.de/smart/DDvec.cgi?smart=2711:Pfam_Gcn1_N(365|717)+Pfam_HEAT_EZ(1510|1564)+Pfam_HEAT_2(1956|2060)+	Translational activator, putative	3512728	AFUA_2G07960	CADAFUBG00002392	CADAFUBG00002392	CADAFUBP00002341	CADAFUBP00002341	CADAFUBT00002392	CADAFUBT00002392	Q4X222	Q4X222_ASPFU	Translational activator, putative	Translational activator, putative	Translational activator, putative	XP_755131	XP_755131.2	afm:AFUA_2G07960
CADAFUBP00002431	746128.CADAFUBP00002431	https://smart.embl.de/smart/DDvec.cgi?smart=421:Pfam_eIF-5_eIF-2B(7|127)+COIL(200|218)+eIF5C(323|413)+	Eukaryotic translation initiation factor 5, putative	3513115	AFUA_2G08990	CADAFUBG00002482	CADAFUBG00002482	CADAFUBP00002431	CADAFUBP00002431	CADAFUBT00002482	CADAFUBT00002482	Q4X1S0	Q4X1S0_ASPFU	XP_755233	XP_755233.1	afm:AFUA_2G08990
CADAFUBP00002460	746128.CADAFUBP00002460	https://smart.embl.de/smart/DDvec.cgi?smart=71:Pfam_ATP-synt_Eps(3|51)+	Mitochondrial ATP synthase epsilon chain domain-containing protein	3513098	AFUA_2G09310	CADAFUBG00002511	CADAFUBG00002511	CADAFUBP00002460	CADAFUBP00002460	CADAFUBT00002511	CADAFUBT00002511	Q4X1N8	Q4X1N8_ASPFU	XP_755265	XP_755265.1	afm:AFUA_2G09310
CADAFUBP00002500	746128.CADAFUBP00002500	http://smart.embl.de/smart/DDt.cgi?smart=319:	Uncharacterized protein	3513604	AFUA_2G09730	CADAFUBG00002552	CADAFUBG00002552	CADAFUBP00002500	CADAFUBP00002500	CADAFUBT00002552	CADAFUBT00002552	Putative uncharacterized protein	Putative uncharacterized protein	Q4X1J7	Q4X1J7_ASPFU	Uncharacterized protein	XP_755306	XP_755306.1	afm:AFUA_2G09730
CADAFUBP00002511	746128.CADAFUBP00002511	https://smart.embl.de/smart/DDvec.cgi?smart=355:Pfam_NMO(8|340)+	Oxidoreductase, 2-nitropropane dioxygenase family, putative	3513375	AFUA_2G09850	CADAFUBG00002563	CADAFUBG00002563	CADAFUBP00002511	CADAFUBP00002511	CADAFUBT00002563	CADAFUBT00002563	Q4X1I5	Q4X1I5_ASPFU	XP_755318	XP_755318.1	afm:AFUA_2G09850
tif35	746128.CADAFUBP00002513	https://smart.embl.de/smart/DDvec.cgi?smart=290:Pfam_eIF3g(25|153)+RRM(211|284)+	Eukaryotic translation initiation factor 3 subunit G; RNA-binding component of the eukaryotic translation initiation factor 3 (eIF-3) complex, which is involved in protein synthesis of a specialized repertoire of mRNAs and, together with other initiation factors, stimulates binding of mRNA and methionyl-tRNAi to the 40S ribosome. The eIF-3 complex specifically targets and initiates translation of…	3513377	AFUA_2G09870	CADAFUBG00002565	CADAFUBG00002565	CADAFUBP00002513	CADAFUBP00002513	CADAFUBT00002565	CADAFUBT00002565	EIF3G_ASPFU	Q4X1I3	XP_755320	XP_755320.1	afm:AFUA_2G09870	tif35
CADAFUBP00002524	746128.CADAFUBP00002524	https://smart.embl.de/smart/DDvec.cgi?smart=1048:IBN_N(24|99)+Pfam_Cse1(319|529)+	Nonsense-mediated mRNA decay protein (Nmd5), putative	3513189	AFUA_2G10010	CADAFUBG00002577	CADAFUBG00002577	CADAFUBP00002524	CADAFUBP00002524	CADAFUBT00002577	CADAFUBT00002577	Q4X1G9	Q4X1G9_ASPFU	XP_755334	XP_755334.2	afm:AFUA_2G10010
CADAFUBP00002526	746128.CADAFUBP00002526	https://smart.embl.de/smart/DDvec.cgi?smart=265:RRM(6|78)+	Actin cytoskeleton protein (VIP1), putative	3513191	AFUA_2G10030	Actin cytoskeleton protein (VIP1), putative	Actin cytoskeleton protein (VIP1), putative	Actin cytoskeleton protein (VIP1), putative	CADAFUBG00002579	CADAFUBG00002579	CADAFUBP00002526	CADAFUBP00002526	CADAFUBT00002579	CADAFUBT00002579	Q4X1G7	Q4X1G7_ASPFU	XP_755336	XP_755336.1	afm:AFUA_2G10030
CADAFUBP00002529	746128.CADAFUBP00002529	https://smart.embl.de/smart/DDvec.cgi?smart=1175:Pfam_CPSase_L_D2(220|424)+CPSase_L_D3(505|630)+Pfam_Dala_Dala_lig_C(763|923)+	Carbamoyl-phosphate synthase, large subunit	3513043	6.3.5.5	AFUA_2G10070	CADAFUBG00002582	CADAFUBG00002582	CADAFUBP00002529	CADAFUBP00002529	CADAFUBT00002582	CADAFUBT00002582	Carbamoyl-phosphate synthase, large subunit	Carbamoyl-phosphate synthase, large subunit	Carbamoyl-phosphate synthase, large subunit	EC 6.3.5.5	Q4X1G3	Q4X1G3_ASPFU	XP_755340	XP_755340.1	afm:AFUA_2G10070
CADAFUBP00002578	746128.CADAFUBP00002578	https://smart.embl.de/smart/DDvec.cgi?smart=242:Pfam_ETC_C1_NDUFA5(27|99)+	NADH-ubiquinone oxidoreductase 299 kDa subunit, putative	3513352	AFUA_2G10600	CADAFUBG00002632	CADAFUBG00002632	CADAFUBP00002578	CADAFUBP00002578	CADAFUBT00002632	CADAFUBT00002632	Q4X1B0	Q4X1B0_ASPFU	XP_755393	XP_755393.1	afm:AFUA_2G10600
CADAFUBP00002622	746128.CADAFUBP00002622	https://smart.embl.de/smart/DDvec.cgi?smart=158:Pfam_ACBP(74|152)+	Acyl CoA binding protein family	3513295	AFUA_2G11060	Acyl CoA binding protein family	Acyl CoA binding protein family	Acyl CoA binding protein family	CADAFUBG00002676	CADAFUBG00002676	CADAFUBP00002622	CADAFUBP00002622	CADAFUBT00002676	CADAFUBT00002676	Q4X164	Q4X164_ASPFU	XP_755439	XP_755439.1	afm:AFUA_2G11060
CADAFUBP00002631	746128.CADAFUBP00002631	https://smart.embl.de/smart/DDvec.cgi?smart=468:Pfam_GDI(1|461)+	Secretory pathway gdp dissociation inhibitor; Belongs to the Rab GDI family	3513036	AFUA_2G11150	CADAFUBG00002685	CADAFUBG00002685	CADAFUBP00002631	CADAFUBP00002631	CADAFUBT00002685	CADAFUBT00002685	Q4X155	Q4X155_ASPFU	Rab GDP dissociation inhibitor	Secretory pathway gdp dissociation inhibitor	Secretory pathway gdp dissociation inhibitor	XP_755448	XP_755448.1	afm:AFUA_2G11150
CADAFUBP00002657	746128.CADAFUBP00002657	https://smart.embl.de/smart/DDvec.cgi?smart=250:Proteasome_A_N(12|34)+Pfam_Proteasome(35|225)+	Proteasome endopeptidase complex; Proteasome component Pup2, putative; Belongs to the peptidase T1A family	3.4.25.1	3512721	AFUA_2G11440	CADAFUBG00002711	CADAFUBG00002711	CADAFUBP00002657	CADAFUBP00002657	CADAFUBT00002711	CADAFUBT00002711	EC 3.4.25.1	Proteasome component Pup2, putative	Proteasome component Pup2, putative	Proteasome endopeptidase complex	Q4X127	Q4X127_ASPFU	XP_755476	XP_755476.1	afm:AFUA_2G11440
CADAFUBP00002661	746128.CADAFUBP00002661	https://smart.embl.de/smart/DDvec.cgi?smart=305:Pfam_BAR_2(14|289)+	BAR domain protein	5076983	A4D9A0	A4D9A0_ASPFU	AFUA_2G11475	BAR domain protein	CADAFUBG00002715	CADAFUBG00002715	CADAFUBP00002661	CADAFUBP00002661	CADAFUBT00002715	CADAFUBT00002715	Putative uncharacterized protein	Putative uncharacterized protein	XP_001481669	XP_001481669.1	afm:AFUA_2G11475
CADAFUBP00002696	746128.CADAFUBP00002696	https://smart.embl.de/smart/DDvec.cgi?smart=867:TPR(52|85)+TPR(86|119)+TPR(120|153)+TPR(156|189)+TPR(193|226)+TPR(230|263)+TPR(264|301)+TPR(302|335)+TPR(336|369)+TPR(370|404)+	Transcriptional corepressor Cyc8, putative	3513238	AFUA_2G11840	CADAFUBG00002751	CADAFUBG00002751	CADAFUBP00002696	CADAFUBP00002696	CADAFUBT00002751	CADAFUBT00002751	Q4X0Y7	Q4X0Y7_ASPFU	Transcriptional corepressor Cyc8, putative	Transcriptional corepressor Cyc8, putative	Transcriptional corepressor Cyc8, putative	XP_755516	XP_755516.1	afm:AFUA_2G11840
CADAFUBP00002705	746128.CADAFUBP00002705	https://smart.embl.de/smart/DDvec.cgi?smart=483:Pfam_Lyase_1(19|308)+ADSL_C(374|458)+	Adenylosuccinate lyase Ade13, putative; Belongs to the lyase 1 family. Adenylosuccinate lyase subfamily	3513573	4.3.2.2	AFUA_2G11940	Adenylosuccinase	Adenylosuccinate lyase	Adenylosuccinate lyase Ade13, putative	Adenylosuccinate lyase Ade13, putative	CADAFUBG00002760	CADAFUBG00002760	CADAFUBP00002705	CADAFUBP00002705	CADAFUBT00002760	CADAFUBT00002760	EC 4.3.2.2	Q4X0X7	Q4X0X7_ASPFU	XP_755526	XP_755526.2	afm:AFUA_2G11940
CADAFUBP00002745	746128.CADAFUBP00002745	https://smart.embl.de/smart/DDvec.cgi?smart=227:Pfam_OSCP(47|223)+	ATP synthase oligomycin sensitivity conferral protein, putative	3513309	AFUA_2G12400	CADAFUBG00002800	CADAFUBG00002800	CADAFUBP00002745	CADAFUBP00002745	CADAFUBT00002800	CADAFUBT00002800	Q4X0T1	Q4X0T1_ASPFU	XP_755572	XP_755572.1	afm:AFUA_2G12400
CADAFUBP00002788	746128.CADAFUBP00002788	https://smart.embl.de/smart/DDvec.cgi?smart=292:Pfam_SNAP(3|285)+	Vesicular-fusion protein sec17	3512751	AFUA_2G12870	CADAFUBG00002843	CADAFUBG00002843	CADAFUBP00002788	CADAFUBP00002788	CADAFUBT00002843	CADAFUBT00002843	Q4X0N5	Q4X0N5_ASPFU	Vesicular-fusion protein sec17	Vesicular-fusion protein sec17	Vesicular-fusion protein sec17	XP_755618	XP_755618.1	afm:AFUA_2G12870
CADAFUBP00002791	746128.CADAFUBP00002791	https://smart.embl.de/smart/DDvec.cgi?smart=271:Pfam_cobW(53|225)+	Urease accessory protein UreG, putative	3512754	AFUA_2G12900	CADAFUBG00002846	CADAFUBG00002846	CADAFUBP00002791	CADAFUBP00002791	CADAFUBT00002846	CADAFUBT00002846	Q4X0N2	Q4X0N2_ASPFU	Urease accessory protein UreG, putative	Urease accessory protein UreG, putative	Urease accessory protein UreG, putative	XP_755621	XP_755621.1	afm:AFUA_2G12900
sec31	746128.CADAFUBP00002799	https://smart.embl.de/smart/DDvec.cgi?smart=1263:WD40(58|100)+WD40(109|149)+WD40(155|195)+WD40(198|242)+WD40(246|286)+WD40(289|329)+Pfam_SRA1(1037|1263)+	Protein transport protein sec31; Component of the coat protein complex II (COPII) which promotes the formation of transport vesicles from the endoplasmic reticulum (ER). The coat has two main functions, the physical deformation of the endoplasmic reticulum membrane into vesicles and the selection of cargo molecules (By similarity)	3512865	AFUA_2G12980	CADAFUBG00002854	CADAFUBG00002854	CADAFUBP00002799	CADAFUBP00002799	CADAFUBT00002854	CADAFUBT00002854	Protein transport protein (SEC31), putative	Protein transport protein (SEC31), putative	Protein transport protein sec31	Q4X0M4	SEC31_ASPFU	XP_755629	XP_755629.1	afm:AFUA_2G12980	sec31
CADAFUBP00002826	746128.CADAFUBP00002826	https://smart.embl.de/smart/DDvec.cgi?smart=506:Pfam_ATP-synt_ab_N(22|88)+Pfam_ATP-synt_ab(145|372)+	V-type ATPase, B subunit, putative	3513132	AFUA_2G13240	CADAFUBG00002881	CADAFUBG00002881	CADAFUBP00002826	CADAFUBP00002826	CADAFUBT00002881	CADAFUBT00002881	Q4X0J7	Q4X0J7_ASPFU	V-type ATPase, B subunit, putative	V-type ATPase, B subunit, putative	V-type ATPase, B subunit, putative	XP_755656	XP_755656.1	afm:AFUA_2G13240
CADAFUBP00002827	746128.CADAFUBP00002827	https://smart.embl.de/smart/DDvec.cgi?smart=735:Pfam_Trp_syntA(8|280)+Pfam_PALP(384|709)+	Bifunctional tryptophan synthase TRPB	3513133	4.2.1.20	AFUA_2G13250	Bifunctional tryptophan synthase TRPB	Bifunctional tryptophan synthase TRPB	CADAFUBG00002882	CADAFUBG00002882	CADAFUBP00002827	CADAFUBP00002827	CADAFUBT00002882	CADAFUBT00002882	EC 4.2.1.20	Q4X0J6	Q4X0J6_ASPFU	Tryptophan synthase	XP_755657	XP_755657.1	afm:AFUA_2G13250
CADAFUBP00002833	746128.CADAFUBP00002833	https://smart.embl.de/smart/DDvec.cgi?smart=453:Pfam_Aminotran_5(32|255)+	Aminotransferase family protein, putative	4.4.1.36	5076986	A4D9B0	A4D9B0_ASPFU	AFUA_2G13295	Aminotransferase family protein (LolT), putative	Aminotransferase family protein, putative	Aminotransferase family protein, putative	CADAFUBG00002888	CADAFUBG00002888	CADAFUBP00002833	CADAFUBP00002833	CADAFUBT00002888	CADAFUBT00002888	EC 4.4.1.36	XP_001481672	XP_001481672.1	afm:AFUA_2G13295
CADAFUBP00002872	746128.CADAFUBP00002872	https://smart.embl.de/smart/DDvec.cgi?smart=434:S_TKc(39|294)+	Calcium/calmodulin-dependent protein kinase, putative; Belongs to the protein kinase superfamily	2.7.11.17	3513715	AFUA_2G13680	CADAFUBG00002927	CADAFUBG00002927	CADAFUBP00002872	CADAFUBP00002872	CADAFUBT00002927	CADAFUBT00002927	EC 2.7.11.17	Q4X0F2	Q4X0F2_ASPFU	XP_755701	XP_755701.1	afm:AFUA_2G13680
CADAFUBP00002874	746128.CADAFUBP00002874	https://smart.embl.de/smart/DDvec.cgi?smart=470:Pfam_Complex1_49kDa(200|470)+	NADH-ubiquinone oxidoreductase 49 kDa subunit, putative; Belongs to the complex I 49 kDa subunit family	1.6.5.3	1.6.99.3	3513718	AFUA_2G13710	CADAFUBG00002929	CADAFUBG00002929	CADAFUBP00002874	CADAFUBP00002874	CADAFUBT00002929	CADAFUBT00002929	EC 1.6.5.3	EC 1.6.99.3	Q4X0E9	Q4X0E9_ASPFU	XP_755704	XP_755704.2	afm:AFUA_2G13710
CADAFUBP00002875	746128.CADAFUBP00002875	https://smart.embl.de/smart/DDvec.cgi?smart=414:RPOLD(103|408)+	DNA-directed RNA polymerase I and III subunit Rpc40, putative	3513719	AFUA_2G13720	CADAFUBG00002930	CADAFUBG00002930	CADAFUBP00002875	CADAFUBP00002875	CADAFUBT00002930	CADAFUBT00002930	Q4X0E8	Q4X0E8_ASPFU	XP_755705	XP_755705.2	afm:AFUA_2G13720
CADAFUBP00002905	746128.CADAFUBP00002905	https://smart.embl.de/smart/DDvec.cgi?smart=667:Arg_tRNA_synt_N(36|116)+Pfam_tRNA-synt_1d(142|515)+DALR_1(529|646)+	Arginyl-tRNA synthetase; Belongs to the class-I aminoacyl-tRNA synthetase family	3513184	6.1.1.19	AFUA_2G14030	Arginyl-tRNA synthetase	Arginyl-tRNA synthetase	Arginyl-tRNA synthetase	CADAFUBG00002961	CADAFUBG00002961	CADAFUBP00002905	CADAFUBP00002905	CADAFUBT00002961	CADAFUBT00002961	EC 6.1.1.19	Q4X0B7	Q4X0B7_ASPFU	XP_755736	XP_755736.2	afm:AFUA_2G14030
CADAFUBP00002922	746128.CADAFUBP00002922	https://smart.embl.de/smart/DDvec.cgi?smart=642:SIGNAL(1|20)+Pfam_ILVD_EDD(105|636)+	Mitochondrial dihydroxy acid dehydratase, putative	3512998	4.2.1.9	AFUA_2G14210	CADAFUBG00002978	CADAFUBG00002978	CADAFUBP00002922	CADAFUBP00002922	CADAFUBT00002978	CADAFUBT00002978	Dihydroxy acid dehydratase Ilv3, putative	EC 4.2.1.9	Q4X099	Q4X099_ASPFU	XP_755754	XP_755754.2	afm:AFUA_2G14210
CADAFUBP00002928	746128.CADAFUBP00002928	https://smart.embl.de/smart/DDvec.cgi?smart=615:DUF1899(4|68)+WD40(70|110)+WD40(128|180)+WD40(183|221)+WD40(224|268)+DUF1900(275|409)+COIL(583|615)+	Coronin; Belongs to the WD repeat coronin family	3512905	AFUA_2G14270	CADAFUBG00002984	CADAFUBG00002984	CADAFUBP00002928	CADAFUBP00002928	CADAFUBT00002984	CADAFUBT00002984	Coronin	Coronin	Coronin	Q4X093	Q4X093_ASPFU	XP_755760	XP_755760.1	afm:AFUA_2G14270
CADAFUBP00002973	746128.CADAFUBP00002973	https://smart.embl.de/smart/DDvec.cgi?smart=917:Pfam_DUF3546(156|265)+ZnF_C2H2(669|694)+	Arsenite resistance protein Ars2, putative	3513499	AFUA_2G14710	Arsenite resistance protein Ars2, putative	Arsenite resistance protein Ars2, putative	Arsenite resistance protein Ars2, putative	CADAFUBG00003030	CADAFUBG00003030	CADAFUBP00002973	CADAFUBP00002973	CADAFUBT00003030	CADAFUBT00003030	Q4X050	Q4X050_ASPFU	XP_755803	XP_755803.2	afm:AFUA_2G14710
CADAFUBP00003034	746128.CADAFUBP00003034	https://smart.embl.de/smart/DDvec.cgi?smart=136:Pfam_GFA(25|118)+	DUF636 domain protein	3513417	AFUA_2G15290	CADAFUBG00003091	CADAFUBG00003091	CADAFUBP00003034	CADAFUBP00003034	CADAFUBT00003091	CADAFUBT00003091	DUF636 domain protein	DUF636 domain protein	DUF636 domain protein	Q4WZY9	Q4WZY9_ASPFU	XP_755864	XP_755864.1	afm:AFUA_2G15290
CADAFUBP00003047	746128.CADAFUBP00003047	https://smart.embl.de/smart/DDvec.cgi?smart=266:Pfam_KR(20|202)+	Sorbitol/xylulose reductase Sou1-like, putative	1.1.1.289	3513090	AFUA_2G15430	CADAFUBG00003104	CADAFUBG00003104	CADAFUBP00003047	CADAFUBP00003047	CADAFUBT00003104	CADAFUBT00003104	EC 1.1.1.289	Q4WZX5	Q4WZX5_ASPFU	Sorbitol/xylulose reductase Sou1-like, putative	Sorbitol/xylulose reductase Sou1-like, putative	Sorbitol/xylulose reductase Sou1-like, putative	XP_755878	XP_755878.1	afm:AFUA_2G15430
CADAFUBP00003090	746128.CADAFUBP00003090	https://smart.embl.de/smart/DDvec.cgi?smart=1042:IBN_N(23|100)+	Importin beta-5 subunit, putative	3513550	AFUA_2G15870	CADAFUBG00003148	CADAFUBG00003148	CADAFUBP00003090	CADAFUBP00003090	CADAFUBT00003148	CADAFUBT00003148	Importin beta-5 subunit, putative	Importin beta-5 subunit, putative	Importin beta-5 subunit, putative	Q4WZT1	Q4WZT1_ASPFU	XP_755922	XP_755922.1	afm:AFUA_2G15870
CADAFUBP00003099	746128.CADAFUBP00003099	https://smart.embl.de/smart/DDvec.cgi?smart=445:Pfam_tRNA_bind(251|367)+	Cofactor for methionyl-and glutamyl-tRNA synthetases, putative	3513237	AFUA_2G15940	CADAFUBG00003157	CADAFUBG00003157	CADAFUBP00003099	CADAFUBP00003099	CADAFUBT00003157	CADAFUBT00003157	Q4WZS4	Q4WZS4_ASPFU	XP_755929	XP_755929.1	afm:AFUA_2G15940
CADAFUBP00003107	746128.CADAFUBP00003107	https://smart.embl.de/smart/DDvec.cgi?smart=566:Pfam_Cpn60_TCP1(37|556)+	T-complex protein 1, alpha subunit, putative; Molecular chaperone; assists the folding of proteins upon ATP hydrolysis	3513019	AFUA_2G16020	CADAFUBG00003165	CADAFUBG00003165	CADAFUBP00003107	CADAFUBP00003107	CADAFUBT00003165	CADAFUBT00003165	Q4WZR6	Q4WZR6_ASPFU	T-complex protein 1 subunit alpha	T-complex protein 1 subunit alpha	T-complex protein 1, alpha subunit, putative	XP_755937	XP_755937.1	afm:AFUA_2G16020
CADAFUBP00003204	746128.CADAFUBP00003204	https://smart.embl.de/smart/DDvec.cgi?smart=2016:Pfam_AMPK1_CBM(9|110)+	PT repeat family protein	3513616	AFUA_2G17000	CADAFUBG00003264	CADAFUBG00003264	CADAFUBP00003204	CADAFUBP00003204	CADAFUBT00003264	CADAFUBT00003264	PT repeat family protein	PT repeat family protein	PT repeat family protein	Q4WZG6	Q4WZG6_ASPFU	XP_756037	XP_756037.2	afm:AFUA_2G17000
CADAFUBP00003393	746128.CADAFUBP00003393	https://smart.embl.de/smart/DDvec.cgi?smart=180:Pfam_HSP20(101|180)+	Heat shock protein Hsp30/Hsp42, putative; Belongs to the small heat shock protein (HSP20) family	3512180	AFUA_3G14540	CADAFUBG00003455	CADAFUBG00003455	CADAFUBP00003393	CADAFUBP00003393	CADAFUBT00003455	CADAFUBT00003455	Heat shock protein Hsp30/Hsp42, putative	Heat shock protein Hsp30/Hsp42, putative	Heat shock protein Hsp30/Hsp42, putative	Q4WYW9	Q4WYW9_ASPFU	XP_754172	XP_754172.1	afm:AFUA_3G14540
chsG	746128.CADAFUBP00003405	https://smart.embl.de/smart/DDvec.cgi?smart=911:Pfam_Chitin_synth_1N(142|221)+Pfam_Chitin_synth_2(356|646)+TRANS(657|679)+TRANS(709|731)+TRANS(840|857)+TRANS(877|899)+	Chitin synthase G; Plays a major role in cell wall biogenesis and required for normal hyphal growth and development	2.4.1.16	3511996	AFUA_3G14420	CADAFUBG00003467	CADAFUBG00003467	CADAFUBP00003405	CADAFUBP00003405	CADAFUBT00003467	CADAFUBT00003467	CHSG_ASPFU	Chitin synthase G	Chitin synthase G	Chitin synthase G	Chitin-UDP acetyl-glucosaminyl transferase G	Class-III chitin synthase G	EC 2.4.1.16	P54267	Q09031	Q09032	Q4WYV7	XP_754184	XP_754184.1	afm:AFUA_3G14420	chsG
CADAFUBP00003410	746128.CADAFUBP00003410	https://smart.embl.de/smart/DDvec.cgi?smart=1453:RPOLA_N(265|567)+Pfam_RNA_pol_Rpb1_4(743|849)+Pfam_RNA_pol_Rpb1_5(856|1363)+	DNA-directed RNA polymerase subunit; DNA-dependent RNA polymerase catalyzes the transcription of DNA into RNA using the four ribonucleoside triphosphates as substrates	2.7.7.6	3512007	AFUA_3G14370	CADAFUBG00003472	CADAFUBG00003472	CADAFUBP00003410	CADAFUBP00003410	CADAFUBT00003472	CADAFUBT00003472	DNA-directed RNA polymerase	DNA-directed RNA polymerase	DNA-directed RNA polymerase subunit	EC 2.7.7.6	Q4WYV2	Q4WYV2_ASPFU	XP_754189	XP_754189.1	afm:AFUA_3G14370
CADAFUBP00003458	746128.CADAFUBP00003458	https://smart.embl.de/smart/DDvec.cgi?smart=493:ZnF_GATA(425|477)+	Sexual development transcription factor NsdD	3512589	AFUA_3G13870	CADAFUBG00003520	CADAFUBG00003520	CADAFUBP00003458	CADAFUBP00003458	CADAFUBT00003520	CADAFUBT00003520	Q4WYQ4	Q4WYQ4_ASPFU	Sexual development transcription factor NsdD	Sexual development transcription factor NsdD	XP_754237	XP_754237.1	afm:AFUA_3G13870
CADAFUBP00003462	746128.CADAFUBP00003462	https://smart.embl.de/smart/DDvec.cgi?smart=201:Pfam_GLTP(29|167)+	Glycolipid transfer protein HET-C2, putative	3512372	AFUA_3G13820	CADAFUBG00003524	CADAFUBG00003524	CADAFUBP00003462	CADAFUBP00003462	CADAFUBT00003524	CADAFUBT00003524	Glycolipid transfer protein HET-C2, putative	Glycolipid transfer protein HET-C2, putative	Glycolipid transfer protein HET-C2, putative	Q4WYP9	Q4WYP9_ASPFU	XP_754242	XP_754242.1	afm:AFUA_3G13820
CADAFUBP00003495	746128.CADAFUBP00003495	https://smart.embl.de/smart/DDvec.cgi?smart=310:S1(15|90)+Pfam_EIF_2_alpha(128|239)+	Translation initiation factor 2 alpha subunit, putative	3511906	AFUA_3G13480	CADAFUBG00003559	CADAFUBG00003559	CADAFUBP00003495	CADAFUBP00003495	CADAFUBT00003559	CADAFUBT00003559	Q4WYL7	Q4WYL7_ASPFU	XP_754274	XP_754274.1	afm:AFUA_3G13480
CADAFUBP00003593	746128.CADAFUBP00003593	https://smart.embl.de/smart/DDvec.cgi?smart=493:COIL(82|111)+	Uncharacterized protein	3512658	AFUA_3G12460	CADAFUBG00003658	CADAFUBG00003658	CADAFUBP00003593	CADAFUBP00003593	CADAFUBT00003658	CADAFUBT00003658	Putative uncharacterized protein	Putative uncharacterized protein	Q4WYB6	Q4WYB6_ASPFU	Uncharacterized protein	XP_754375	XP_754375.1	afm:AFUA_3G12460
CADAFUBP00003612	746128.CADAFUBP00003612	https://smart.embl.de/smart/DDvec.cgi?smart=235:Pfam_GSHPx(51|161)+	Glutathione peroxidase; Belongs to the glutathione peroxidase family	1.11.1.9	3512304	AFUA_3G12270	CADAFUBG00003677	CADAFUBG00003677	CADAFUBP00003612	CADAFUBP00003612	CADAFUBT00003677	CADAFUBT00003677	EC 1.11.1.9	Glutathione peroxidase	Glutathione peroxidase	Glutathione peroxidase	Q4WY97	Q4WY97_ASPFU	XP_754394	XP_754394.1	afm:AFUA_3G12270
CADAFUBP00003630	746128.CADAFUBP00003630	https://smart.embl.de/smart/DDvec.cgi?smart=694:Pfam_Glyco_trans_1_4(457|617)+	Trehalose synthase (Ccg-9), putative	2.4.1.231	3512586	AFUA_3G12100	CADAFUBG00003695	CADAFUBG00003695	CADAFUBP00003630	CADAFUBP00003630	CADAFUBT00003695	CADAFUBT00003695	EC 2.4.1.231	Q4WY80	Q4WY80_ASPFU	Trehalose synthase (Ccg-9), putative	Trehalose synthase (Ccg-9), putative	Trehalose synthase (Ccg-9), putative	XP_754411	XP_754411.1	afm:AFUA_3G12100
CADAFUBP00003675	746128.CADAFUBP00003675	https://smart.embl.de/smart/DDvec.cgi?smart=368:Pfam_NAD_binding_3(10|145)+Pfam_Homoserine_dh(153|361)+	Homoserine dehydrogenase	1.1.1.3	3512560	AFUA_3G11640	CADAFUBG00003740	CADAFUBG00003740	CADAFUBP00003675	CADAFUBP00003675	CADAFUBT00003740	CADAFUBT00003740	EC 1.1.1.3	Homoserine dehydrogenase	Homoserine dehydrogenase	Homoserine dehydrogenase	Q4WY36	Q4WY36_ASPFU	XP_754455	XP_754455.1	afm:AFUA_3G11640
pep2	746128.CADAFUBP00003699	https://smart.embl.de/smart/DDvec.cgi?smart=398:SIGNAL(1|18)+Pfam_TAXi_N(85|140)+	Vacuolar protease A; Vacuolar aspartic endopeptidase which is probably also secreted and contributes to virulence	3.4.23.25	3512540	AFUA_3G11400	Aspartic endopeptidase Pep2	Aspartic endopeptidase Pep2	Aspartic endopeptidase pep2	Aspartic protease pep2	CADAFUBG00003764	CADAFUBG00003764	CADAFUBP00003699	CADAFUBP00003699	CADAFUBT00003764	CADAFUBT00003764	CARP_ASPFU	EC 3.4.23.25	O42630	Q4WY12	Vacuolar protease A	XP_754479	XP_754479.1	afm:AFUA_3G11400	pep2
CADAFUBP00003700	746128.CADAFUBP00003700	https://smart.embl.de/smart/DDvec.cgi?smart=465:COIL(57|85)+AAA(198|337)+	Proteasome regulatory particle subunit Rpt3, putative; Belongs to the AAA ATPase family	3512541	AFUA_3G11390	CADAFUBG00003765	CADAFUBG00003765	CADAFUBP00003700	CADAFUBP00003700	CADAFUBT00003765	CADAFUBT00003765	Q4WY11	Q4WY11_ASPFU	XP_754480	XP_754480.1	afm:AFUA_3G11390
int6	746128.CADAFUBP00003703	https://smart.embl.de/smart/DDvec.cgi?smart=451:eIF3_N(32|162)+PINT(354|435)+	Eukaryotic translation initiation factor 3 subunit E; Component of the eukaryotic translation initiation factor 3 (eIF-3) complex, which is involved in protein synthesis of a specialized repertoire of mRNAs and, together with other initiation factors, stimulates binding of mRNA and methionyl-tRNAi to the 40S ribosome. The eIF-3 complex specifically targets and initiates translation of a subset of…	3512550	AFUA_3G11360	CADAFUBG00003768	CADAFUBG00003768	CADAFUBP00003703	CADAFUBP00003703	CADAFUBT00003768	CADAFUBT00003768	EIF3E_ASPFU	Q4WY08	XP_754483	XP_754483.1	afm:AFUA_3G11360	int6
get3	746128.CADAFUBP00003705	https://smart.embl.de/smart/DDvec.cgi?smart=340:Pfam_Fer4_NifH(27|78)+	ATPase get3; ATPase required for the post-translational delivery of tail-anchored (TA) proteins to the endoplasmic reticulum. Recognizes and selectively binds the transmembrane domain of TA proteins in the cytosol. This complex then targets to the endoplasmic reticulum by membrane-bound receptors, where the tail- anchored protein is released for insertion. This process is regulated by ATP binding…	3.6.3.-	3.6.3.16	3512551	3IBG	AFUA_3G11350	ATPase get3	ATPase get3	ATPase get3	Arsenical pump-driving ATPase	Arsenite-stimulated ATPase	CADAFUBG00003770	CADAFUBG00003770	CADAFUBP00003705	CADAFUBP00003705	CADAFUBT00003770	CADAFUBT00003770	EC 3.6.3.-	EC 3.6.3.16	GET3_ASPFU	Golgi to ER traffic protein 3	Guided entry of tail-anchored proteins 3	Q4WY07	XP_754484	XP_754484.2	afm:AFUA_3G11350	get3
CADAFUBP00003719	746128.CADAFUBP00003719	https://smart.embl.de/smart/DDvec.cgi?smart=759:Pfam_CP2(191|433)+	CP2 transcription factor, putative	3512328	AFUA_3G11170	CADAFUBG00003784	CADAFUBG00003784	CADAFUBP00003719	CADAFUBP00003719	CADAFUBT00003784	CADAFUBT00003784	CP2 transcription factor, putative	Putative uncharacterized protein	Putative uncharacterized protein	Q4WXY9	Q4WXY9_ASPFU	XP_754502	XP_754502.2	afm:AFUA_3G11170
clu1	746128.CADAFUBP00003755	https://smart.embl.de/smart/DDvec.cgi?smart=1310:Pfam_CLU_N(113|186)+Pfam_CLU(396|618)+Pfam_eIF3_p135(756|920)+Pfam_TPR_10(1032|1073)+Pfam_TPR_10(1074|1115)+Pfam_TPR_10(1116|1157)+	Clustered mitochondria protein homolog; mRNA-binding protein involved in proper cytoplasmic distribution of mitochondria	3512080	AFUA_3G10800	CADAFUBG00003820	CADAFUBG00003820	CADAFUBP00003755	CADAFUBP00003755	CADAFUBT00003820	CADAFUBT00003820	CLU_ASPFU	Clustered mitochondria protein homolog	Clustered mitochondria protein homolog	Clustered mitochondria protein homolog	Protein TIF31 homolog	Q4WXV2	XP_754539	XP_754539.1	afm:AFUA_3G10800	clu1	tif31
CADAFUBP00003769	746128.CADAFUBP00003769	https://smart.embl.de/smart/DDvec.cgi?smart=460:Pfam_HMG_CoA_synt_N(4|177)+Pfam_HMG_CoA_synt_C(178|459)+	3-hydroxy-3-methylglutaryl coenzyme A synthase; This enzyme condenses acetyl-CoA with acetoacetyl-CoA to form HMG-CoA, which is the substrate for HMG-CoA reductase	2.3.3.10	3-hydroxy-3-methylglutaryl coenzyme A synthase	3512339	AFUA_3G10660	CADAFUBG00003837	CADAFUBG00003837	CADAFUBP00003769	CADAFUBP00003769	CADAFUBT00003837	CADAFUBT00003837	EC 2.3.3.10	Hydroxymethylglutaryl-CoA synthase, putative	Hydroxymethylglutaryl-CoA synthase, putative	Q4WXT8	Q4WXT8_ASPFU	XP_754553	XP_754553.1	afm:AFUA_3G10660
CADAFUBP00003789	746128.CADAFUBP00003789	https://smart.embl.de/smart/DDvec.cgi?smart=124:Pfam_NTF2(7|120)+	Nuclear transport factor NTF-2, putative	3512220	AFUA_3G10460	CADAFUBG00003857	CADAFUBG00003857	CADAFUBP00003789	CADAFUBP00003789	CADAFUBT00003857	CADAFUBT00003857	Nuclear transport factor NTF-2, putative	Nuclear transport factor NTF-2, putative	Nuclear transport factor NTF-2, putative	Q4WXR8	Q4WXR8_ASPFU	XP_754573	XP_754573.1	afm:AFUA_3G10460
CADAFUBP00003798	746128.CADAFUBP00003798	https://smart.embl.de/smart/DDvec.cgi?smart=878:Pfam_Vps35(14|838)+	Vacuolar protein sorting-associated protein 35; Plays a role in vesicular protein sorting	3512002	AFUA_3G10360	CADAFUBG00003866	CADAFUBG00003866	CADAFUBP00003798	CADAFUBP00003798	CADAFUBT00003866	CADAFUBT00003866	Q4WXQ8	Q4WXQ8_ASPFU	Vacuolar protein sorting-associated protein 35	Vacuolar sorting protein 35	Vacuolar sorting protein 35	XP_754583	XP_754583.1	afm:AFUA_3G10360
CADAFUBP00003803	746128.CADAFUBP00003803	https://smart.embl.de/smart/DDvec.cgi?smart=752:Pfam_TPP_enzyme_N(151|320)+Pfam_TPP_enzyme_M(350|495)+Pfam_TPP_enzyme_C(558|705)+	Acetolactate synthase	2.2.1.6	3511939	AFUA_3G10310	Acetolactate synthase	Acetolactate synthase	Acetolactate synthase	CADAFUBG00003871	CADAFUBG00003871	CADAFUBP00003803	CADAFUBP00003803	CADAFUBT00003871	CADAFUBT00003871	EC 2.2.1.6	Q4WXQ3	Q4WXQ3_ASPFU	XP_754588	XP_754588.1	afm:AFUA_3G10310
CADAFUBP00003804	746128.CADAFUBP00003804	https://smart.embl.de/smart/DDvec.cgi?smart=549:Pfam_GalKase_gal_bdg(41|90)+Pfam_GHMP_kinases_N(162|229)+Pfam_GHMP_kinases_C(400|487)+	Galactokinase	2.7.1.6	3511940	AFUA_3G10300	CADAFUBG00003872	CADAFUBG00003872	CADAFUBP00003804	CADAFUBP00003804	CADAFUBT00003872	CADAFUBT00003872	EC 2.7.1.6	Galactokinase	Galactokinase	Galactokinase	Q4WXQ2	Q4WXQ2_ASPFU	XP_754589	XP_754589.1	afm:AFUA_3G10300
CADAFUBP00003903	746128.CADAFUBP00003903	https://smart.embl.de/smart/DDvec.cgi?smart=308:Pfam_CSN8_PSD8_EIF3K(123|286)+	Eukaryotic translation initiation factor 3 subunit K; Component of the eukaryotic translation initiation factor 3 (eIF-3) complex, which is involved in protein synthesis of a specialized repertoire of mRNAs and, together with other initiation factors, stimulates binding of mRNA and methionyl-tRNAi to the 40S ribosome. The eIF-3 complex specifically targets and initiates translation of a subset of…	3511843	AFUA_3G09280	CADAFUBG00003971	CADAFUBG00003971	CADAFUBP00003903	CADAFUBP00003903	CADAFUBT00003971	CADAFUBT00003971	EIF3K_ASPFU	Q4WXE9	XP_754692	XP_754692.1	afm:AFUA_3G09280	eIF-3 p25
CADAFUBP00003930	746128.CADAFUBP00003930	https://smart.embl.de/smart/DDvec.cgi?smart=506:Pfam_PALP(59|322)+	Threonine synthase	3511986	4.2.3.1	AFUA_3G08980	CADAFUBG00004000	CADAFUBG00004000	CADAFUBP00003930	CADAFUBP00003930	CADAFUBT00004000	CADAFUBT00004000	EC 4.2.3.1	Q4WXC3	Q4WXC3_ASPFU	Threonine synthase	Threonine synthase	Threonine synthase Thr4, putative	XP_754718	XP_754718.1	afm:AFUA_3G08980
CADAFUBP00003937	746128.CADAFUBP00003937	https://smart.embl.de/smart/DDvec.cgi?smart=408:Pfam_TBCC_N(9|116)+CARP(293|327)+	Tubulin-specific chaperone c, putative	3512058	AFUA_3G08900	CADAFUBG00004007	CADAFUBG00004007	CADAFUBP00003937	CADAFUBP00003937	CADAFUBT00004007	CADAFUBT00004007	Q4WXB5	Q4WXB5_ASPFU	Tubulin-specific chaperone c, putative	Tubulin-specific chaperone c, putative	Tubulin-specific chaperone c, putative	XP_754726	XP_754726.1	afm:AFUA_3G08900
CADAFUBP00003943	746128.CADAFUBP00003943	https://smart.embl.de/smart/DDvec.cgi?smart=1212:WD40(4|43)+WD40(46|85)+WD40(88|127)+WD40(130|169)+WD40(204|243)+WD40(248|287)+WD40(290|328)+Pfam_Coatomer_WDAD(349|779)+Pfam_COPI_C(822|1212)+	Coatomer subunit alpha; The coatomer is a cytosolic protein complex that binds to dilysine motifs and reversibly associates with Golgi non- clathrin-coated vesicles, which further mediate biosynthetic protein transport from the ER, via the Golgi up to the trans Golgi network	3512069	AFUA_3G08840	CADAFUBG00004013	CADAFUBG00004013	CADAFUBP00003943	CADAFUBP00003943	CADAFUBT00004013	CADAFUBT00004013	Coatomer subunit alpha	Coatomer subunit alpha, putative	Coatomer subunit alpha, putative	Q4WXA9	Q4WXA9_ASPFU	XP_754732	XP_754732.1	afm:AFUA_3G08840
CADAFUBP00003961	746128.CADAFUBP00003961	https://smart.embl.de/smart/DDvec.cgi?smart=939:Pfam_THF_DHG_CYH(5|122)+Pfam_THF_DHG_CYH_C(125|292)+Pfam_FTHFS(312|939)+	C1 tetrahydrofolate synthase, putative	1.5.1.5	3.5.4.9	3512153	6.3.4.3	AFUA_3G08650	C1 tetrahydrofolate synthase, putative	C1 tetrahydrofolate synthase, putative	C1 tetrahydrofolate synthase, putative	CADAFUBG00004031	CADAFUBG00004031	CADAFUBP00003961	CADAFUBP00003961	CADAFUBT00004031	CADAFUBT00004031	EC 1.5.1.5	EC 3.5.4.9	EC 6.3.4.3	Q4WX91	Q4WX91_ASPFU	XP_754750	XP_754750.1	afm:AFUA_3G08650
CADAFUBP00003972	746128.CADAFUBP00003972	https://smart.embl.de/smart/DDvec.cgi?smart=323:EFh(185|213)+EFh(215|243)+EFh(291|318)+	Calcium binding modulator protein (Alg2), putative	3512172	AFUA_3G08540	CADAFUBG00004043	CADAFUBG00004043	CADAFUBP00003972	CADAFUBP00003972	CADAFUBT00004043	CADAFUBT00004043	Q4WX80	Q4WX80_ASPFU	XP_754761	XP_754761.2	afm:AFUA_3G08540
CADAFUBP00003978	746128.CADAFUBP00003978	https://smart.embl.de/smart/DDvec.cgi?smart=502:Pfam_G6PD_N(17|194)+Pfam_G6PD_C(196|492)+	Glucose-6-phosphate 1-dehydrogenase; Catalyzes the rate-limiting step of the oxidative pentose-phosphate pathway, which represents a route for the dissimilation of carbohydrates besides glycolysis	1.1.1.363	1.1.1.49	3512190	AFUA_3G08470	CADAFUBG00004049	CADAFUBG00004049	CADAFUBP00003978	CADAFUBP00003978	CADAFUBT00004049	CADAFUBT00004049	EC 1.1.1.363	EC 1.1.1.49	Glucose-6-phosphate 1-dehydrogenase	Glucose-6-phosphate 1-dehydrogenase	Glucose-6-phosphate 1-dehydrogenase	Q4WX74	Q4WX74_ASPFU	XP_754767	XP_754767.1	afm:AFUA_3G08470
CADAFUBP00004048	746128.CADAFUBP00004048	https://smart.embl.de/smart/DDvec.cgi?smart=440:Pfam_Lyase_1(1|286)+Pfam_ASL_C2(349|416)+	Argininosuccinate lyase	3512572	4.3.2.1	AFUA_3G07790	Argininosuccinate lyase	Argininosuccinate lyase	Argininosuccinate lyase	CADAFUBG00004120	CADAFUBG00004120	CADAFUBP00004048	CADAFUBP00004048	CADAFUBT00004120	CADAFUBT00004120	EC 4.3.2.1	Q4WX07	Q4WX07_ASPFU	XP_754834	XP_754834.1	afm:AFUA_3G07790
CADAFUBP00004058	746128.CADAFUBP00004058	https://smart.embl.de/smart/DDvec.cgi?smart=422:LRR(32|59)+LRR(94|121)+LRR(122|149)+LRR(222|249)+LRR(250|277)+LRR(280|307)+LRR(309|338)+COIL(354|404)+	Ran GTPase activating protein 1 (RNA1 protein)	3512548	AFUA_3G07680	CADAFUBG00004130	CADAFUBG00004130	CADAFUBP00004058	CADAFUBP00004058	CADAFUBT00004130	CADAFUBT00004130	Q4WWZ8	Q4WWZ8_ASPFU	Ran GTPase activating protein 1 (RNA1 protein)	Ran GTPase activating protein 1 (RNA1 protein)	Ran GTPase activating protein 1 (RNA1 protein)	XP_754843	XP_754843.1	afm:AFUA_3G07680
CADAFUBP00004161	746128.CADAFUBP00004161	https://smart.embl.de/smart/DDvec.cgi?smart=508:PINT(391|470)+	Proteasome regulatory particle subunit (RpnE), putative	3512613	AFUA_3G06610	CADAFUBG00004233	CADAFUBG00004233	CADAFUBP00004161	CADAFUBP00004161	CADAFUBT00004233	CADAFUBT00004233	Q4WWP6	Q4WWP6_ASPFU	XP_754945	XP_754945.1	afm:AFUA_3G06610
CADAFUBP00004167	746128.CADAFUBP00004167	https://smart.embl.de/smart/DDvec.cgi?smart=469:Pfam_Put_Phosphatase(246|421)+	Phosphoserine phosphatase	3.1.3.3	3512566	AFUA_3G06550	CADAFUBG00004239	CADAFUBG00004239	CADAFUBP00004167	CADAFUBP00004167	CADAFUBT00004239	CADAFUBT00004239	EC 3.1.3.3	Phosphoserine phosphatase	Phosphoserine phosphatase	Phosphoserine phosphatase	Q4WWP0	Q4WWP0_ASPFU	XP_754951	XP_754951.1	afm:AFUA_3G06550
met3	746128.CADAFUBP00004169	https://smart.embl.de/smart/DDvec.cgi?smart=574:Pfam_PUA_2(3|165)+Pfam_ATP-sulfurylase(172|388)+Pfam_APS_kinase(395|554)+	Sulfate adenylyltransferase; Catalyzes the first intracellular reaction of sulfate assimilation, forming adenosine-5'-phosphosulfate (APS) from inorganic sulfate and ATP. Plays an important role in sulfate activation as a component of the biosynthesis pathway of sulfur- containing amino acids; In the C-terminal section; belongs to the APS kinase family	2.7.7.4	3512568	AFUA_3G06530	ATP-sulfurylase	CADAFUBG00004241	CADAFUBG00004241	CADAFUBP00004169	CADAFUBP00004169	CADAFUBT00004241	CADAFUBT00004241	EC 2.7.7.4	MET3_ASPFU	Q4WWN8	Q96UQ5	Sulfate adenylate transferase	Sulfate adenylyltransferase	Sulfate adenylyltransferase	Sulfate adenylyltransferase	XP_754953	XP_754953.1	afm:AFUA_3G06530	met3	sC
CADAFUBP00004198	746128.CADAFUBP00004198	https://smart.embl.de/smart/DDvec.cgi?smart=114:Pfam_SUI1(25|103)+	Translation initiation factor SUI1, putative	3511711	AFUA_3G06260	CADAFUBG00004270	CADAFUBG00004270	CADAFUBP00004198	CADAFUBP00004198	CADAFUBT00004270	CADAFUBT00004270	Q4WWL1	Q4WWL1_ASPFU	Translation initiation factor SUI1, putative	Translation initiation factor SUI1, putative	Translation initiation factor SUI1, putative	XP_754980	XP_754980.1	afm:AFUA_3G06260
CADAFUBP00004230	746128.CADAFUBP00004230	https://smart.embl.de/smart/DDvec.cgi?smart=829:Pfam_HUN(641|688)+	Uncharacterized protein	3512649	AFUA_3G05910	CADAFUBG00004302	CADAFUBG00004302	CADAFUBP00004230	CADAFUBP00004230	CADAFUBT00004302	CADAFUBT00004302	Putative uncharacterized protein	Putative uncharacterized protein	Q4WWH8	Q4WWH8_ASPFU	Uncharacterized protein	XP_755013	XP_755013.1	afm:AFUA_3G05910
CADAFUBP00004273	746128.CADAFUBP00004273	https://smart.embl.de/smart/DDvec.cgi?smart=478:Pfam_M20_dimer(208|369)+	Glutamate carboxypeptidase, putative	3.4.13.-	3512680	AFUA_3G05450	CADAFUBG00004345	CADAFUBG00004345	CADAFUBP00004273	CADAFUBP00004273	CADAFUBT00004345	CADAFUBT00004345	EC 3.4.13.-	Glutamate carboxypeptidase, putative	Glutamate carboxypeptidase, putative	Glutamate carboxypeptidase, putative	Q4WWD5	Q4WWD5_ASPFU	XP_755056	XP_755056.1	afm:AFUA_3G05450
CADAFUBP00004591	746128.CADAFUBP00004591	https://smart.embl.de/smart/DDvec.cgi?smart=646:Pfam_GMC_oxred_N(30|326)+Pfam_GMC_oxred_C(443|585)+	GMC oxidoreductase, putative	3505842	AFUA_3G01580	CADAFUBG00004673	CADAFUBG00004673	CADAFUBP00004591	CADAFUBP00004591	CADAFUBT00004673	CADAFUBT00004673	GMC oxidoreductase, putative	GMC oxidoreductase, putative	GMC oxidoreductase, putative	Q4WFN7	Q4WFN7_ASPFU	XP_748478	XP_748478.1	afm:AFUA_3G01580
gua1	746128.CADAFUBP00004636	https://smart.embl.de/smart/DDvec.cgi?smart=557:Pfam_Peptidase_C26(76|185)+Pfam_NAD_synthase(213|312)+Pfam_GMP_synt_C(447|498)+Pfam_GMP_synt_C(501|556)+	GMP synthase	3505905	6.3.5.2	AFUA_3G01110	CADAFUBG00004720	CADAFUBG00004720	CADAFUBP00004636	CADAFUBP00004636	CADAFUBT00004720	CADAFUBT00004720	EC 6.3.5.2	GMP synthase	GMP synthase	GMP synthase [glutamine-hydrolyzing]	GMP synthetase	GUAA_ASPFU	Glutamine amidotransferase	Q4WFT3	XP_748432	XP_748432.1	afm:AFUA_3G01110	gua1
CADAFUBP00004811	746128.CADAFUBP00004811	http://smart.embl.de/smart/DDt.cgi?smart=248:	GNAT family acetyltransferase, putative	3505744	AFUA_5G00720	CADAFUBG00004899	CADAFUBG00004899	CADAFUBP00004811	CADAFUBP00004811	CADAFUBT00004899	CADAFUBT00004899	GNAT family acetyltransferase, putative	GNAT family acetyltransferase, putative	GNAT family acetyltransferase, putative	Q4WDU8	Q4WDU8_ASPFU	XP_748267	XP_748267.1	afm:AFUA_5G00720
CADAFUBP00004980	746128.CADAFUBP00004980	https://smart.embl.de/smart/DDvec.cgi?smart=698:DYNc(13|275)+GED(606|697)+	Vacuolar dynamin-like GTPase VpsA, putative; Belongs to the TRAFAC class dynamin-like GTPase superfamily. Dynamin/Fzo/YdjA family	3.6.5.5	3505538	AFUA_5G02360	CADAFUBG00005069	CADAFUBG00005069	CADAFUBP00004980	CADAFUBP00004980	CADAFUBT00005069	CADAFUBT00005069	EC 3.6.5.5	Q4WEA9	Q4WEA9_ASPFU	Vacuolar dynamin-like GTPase VpsA, putative	Vacuolar dynamin-like GTPase VpsA, putative	Vacuolar dynamin-like GTPase VpsA, putative	XP_748106	XP_748106.1	afm:AFUA_5G02360
CADAFUBP00004981	746128.CADAFUBP00004981	https://smart.embl.de/smart/DDvec.cgi?smart=686:Pfam_ATP-synt_ab_N(97|159)+Pfam_ATP-synt_ab_Xtn(175|297)+Pfam_ATP-synt_ab(306|531)+	Vacuolar ATP synthase catalytic subunit A, putative	3.6.3.14	3505633	AFUA_5G02370	CADAFUBG00005070	CADAFUBG00005070	CADAFUBP00004981	CADAFUBP00004981	CADAFUBT00005070	CADAFUBT00005070	EC 3.6.3.14	Q4WEB0	Q4WEB0_ASPFU	XP_748105	XP_748105.1	afm:AFUA_5G02370
fal1	746128.CADAFUBP00004985	https://smart.embl.de/smart/DDvec.cgi?smart=429:DEXDc(53|250)+HELICc(287|368)+	ATP-dependent RNA helicase fal1; ATP-dependent RNA helicase involved in 40S ribosomal subunit biogenesis. Required for the processing and cleavage of 35S pre-rRNA at sites A0, A1, and A2, leading to mature 18S rRNA (By similarity); Belongs to the DEAD box helicase family. DDX48/FAL1 subfamily	3.6.4.13	3505629	AFUA_5G02410	ATP-dependent RNA helicase fal1	CADAFUBG00005074	CADAFUBG00005074	CADAFUBP00004985	CADAFUBP00004985	CADAFUBT00005074	CADAFUBT00005074	EC 3.6.4.13	FAL1_ASPFU	Inositol 5-phosphatase, putative	Inositol 5-phosphatase, putative	Q4WEB4	XP_748101	XP_748101.1	afm:AFUA_5G02410	fal1
CADAFUBP00004989	746128.CADAFUBP00004989	https://smart.embl.de/smart/DDvec.cgi?smart=347:Pfam_polyprenyl_synt(35|300)+	Farnesyl-pyrophosphate synthetase; Belongs to the FPP/GGPP synthase family	2.5.1.1	2.5.1.10	3505656	AFUA_5G02450	CADAFUBG00005078	CADAFUBG00005078	CADAFUBP00004989	CADAFUBP00004989	CADAFUBT00005078	CADAFUBT00005078	EC 2.5.1.1	EC 2.5.1.10	Farnesyl-pyrophosphate synthetase	Farnesyl-pyrophosphate synthetase	Farnesyl-pyrophosphate synthetase	Q4WEB8	Q4WEB8_ASPFU	XP_748097	XP_748097.1	afm:AFUA_5G02450
CADAFUBP00005000	746128.CADAFUBP00005000	https://smart.embl.de/smart/DDvec.cgi?smart=673:Pfam_B56(202|611)+	Serine/threonine-protein phosphatase 2A 56 kDa regulatory subunit; The B regulatory subunit might modulate substrate selectivity and catalytic activity, and also might direct the localization of the catalytic enzyme to a particular subcellular compartment	3505410	AFUA_5G02560	CADAFUBG00005089	CADAFUBG00005089	CADAFUBP00005000	CADAFUBP00005000	CADAFUBT00005089	CADAFUBT00005089	Q4WEC9	Q4WEC9_ASPFU	XP_748086	XP_748086.1	afm:AFUA_5G02560
CADAFUBP00005019	746128.CADAFUBP00005019	https://smart.embl.de/smart/DDvec.cgi?smart=158:Pfam_COX5A(55|155)+	Cytochrome c oxidase subunit Va, putative	3505505	AFUA_5G02750	CADAFUBG00005108	CADAFUBG00005108	CADAFUBP00005019	CADAFUBP00005019	CADAFUBT00005108	CADAFUBT00005108	Cytochrome c oxidase subunit Va, putative	Cytochrome c oxidase subunit Va, putative	Cytochrome c oxidase subunit Va, putative	Q4WEE8	Q4WEE8_ASPFU	XP_748067	XP_748067.1	afm:AFUA_5G02750
CADAFUBP00005028	746128.CADAFUBP00005028	https://smart.embl.de/smart/DDvec.cgi?smart=348:Pfam_Cyclase(67|282)+	Uncharacterized protein	3505457	AFUA_5G02850	CADAFUBG00005117	CADAFUBG00005117	CADAFUBP00005028	CADAFUBP00005028	CADAFUBT00005117	CADAFUBT00005117	Putative uncharacterized protein	Putative uncharacterized protein	Q4WEF7	Q4WEF7_ASPFU	Uncharacterized protein	XP_748058	XP_748058.2	afm:AFUA_5G02850
CADAFUBP00005034	746128.CADAFUBP00005034	https://smart.embl.de/smart/DDvec.cgi?smart=354:Pfam_NAP(62|319)+	NAP family protein; Belongs to the nucleosome assembly protein (NAP) family	3505771	AFUA_5G02910	CADAFUBG00005123	CADAFUBG00005123	CADAFUBP00005034	CADAFUBP00005034	CADAFUBT00005123	CADAFUBT00005123	NAP family protein	NAP family protein	NAP family protein	Q4WEG3	Q4WEG3_ASPFU	XP_748052	XP_748052.1	afm:AFUA_5G02910
CADAFUBP00005084	746128.CADAFUBP00005084	https://smart.embl.de/smart/DDvec.cgi?smart=1748:JmjN(74|115)+BRIGHT(164|257)+PHD(483|529)+JmjC(623|789)+Pfam_zf-C5HC2(880|939)+Pfam_PLU-1(952|1295)+PHD(1356|1401)+	PHD transcription factor (Rum1), putative	1.14.11.-	3505458	AFUA_5G03430	CADAFUBG00005175	CADAFUBG00005175	CADAFUBP00005084	CADAFUBP00005084	CADAFUBT00005175	CADAFUBT00005175	EC 1.14.11.-	PHD transcription factor (Rum1), putative	PHD transcription factor (Rum1), putative	PHD transcription factor (Rum1), putative	Q4WEL5	Q4WEL5_ASPFU	XP_748000	XP_748000.1	afm:AFUA_5G03430
sfh5	746128.CADAFUBP00005109	https://smart.embl.de/smart/DDvec.cgi?smart=424:CRAL_TRIO_N(141|166)+Pfam_CRAL_TRIO(203|358)+	Phosphatidylinositol transfer protein sfh5; Non-classical phosphatidylinositol (PtdIns) transfer protein (PITP), which exhibits PtdIns-binding/transfer activity in the absence of detectable PtdCho-binding/transfer activity. Regulates PtdIns(4,5)P2 homeostasis at the plasma membrane (By similarity)	3505477	AFUA_5G03690	CADAFUBG00005200	CADAFUBG00005200	CADAFUBP00005109	CADAFUBP00005109	CADAFUBT00005200	CADAFUBT00005200	CRAL/TRIO domain protein	CRAL/TRIO domain protein	Phosphatidylinositol transfer protein sfh5	Q4WEP0	SFH5_ASPFU	XP_747975	XP_747975.1	afm:AFUA_5G03690	sfh5
CADAFUBP00005166	746128.CADAFUBP00005166	https://smart.embl.de/smart/DDvec.cgi?smart=434:Pfam_Aminotran_5(29|223)+	Homocysteine synthase CysD	2.5.1.47	2.5.1.49	3505585	AFUA_5G04250	CADAFUBG00005257	CADAFUBG00005257	CADAFUBP00005166	CADAFUBP00005166	CADAFUBT00005257	CADAFUBT00005257	EC 2.5.1.47	EC 2.5.1.49	Homocysteine synthase CysD	Homocysteine synthase CysD	Homocysteine synthase CysD	Q4WEU7	Q4WEU7_ASPFU	XP_747918	XP_747918.1	afm:AFUA_5G04250
CADAFUBP00005174	746128.CADAFUBP00005174	https://smart.embl.de/smart/DDvec.cgi?smart=967:Pfam_Peptidase_M1(319|554)+Pfam_ERAP1_C(629|945)+	Aminopeptidase, putative	3505549	AFUA_5G04330	Aminopeptidase	Aminopeptidase, putative	Aminopeptidase, putative	CADAFUBG00005265	CADAFUBG00005265	CADAFUBP00005174	CADAFUBP00005174	CADAFUBT00005265	CADAFUBT00005265	Q4WEV5	Q4WEV5_ASPFU	XP_747910	XP_747910.1	afm:AFUA_5G04330
CADAFUBP00005182	746128.CADAFUBP00005182	https://smart.embl.de/smart/DDvec.cgi?smart=666:Pfam_Fer2_4(1|38)+NADH-G_4Fe-4S_3(44|84)+Pfam_Molybdopterin(386|560)+Pfam_NADH_dhqG_C(589|640)+	NADH-ubiquinone oxidoreductase, subunit G, putative	1.6.5.3	1.6.99.3	3505442	AFUA_5G04370	CADAFUBG00005273	CADAFUBG00005273	CADAFUBP00005182	CADAFUBP00005182	CADAFUBT00005273	CADAFUBT00005273	EC 1.6.5.3	EC 1.6.99.3	Q4WEV9	Q4WEV9_ASPFU	XP_747906	XP_747906.1	afm:AFUA_5G04370
CADAFUBP00005194	746128.CADAFUBP00005194	https://smart.embl.de/smart/DDvec.cgi?smart=474:Pfam_Seryl_tRNA_N(1|112)+Pfam_tRNA-synt_2b(224|412)+	Seryl-tRNA synthetase	3511629	6.1.1.11	AFUA_5G05490	CADAFUBG00005285	CADAFUBG00005285	CADAFUBP00005194	CADAFUBP00005194	CADAFUBT00005285	CADAFUBT00005285	EC 6.1.1.11	Q4WTN3	Q4WTN3_ASPFU	Seryl-tRNA synthetase	Seryl-tRNA synthetase	Seryl-tRNA synthetase	XP_754081	XP_754081.1	afm:AFUA_5G05490
CADAFUBP00005195	746128.CADAFUBP00005195	https://smart.embl.de/smart/DDvec.cgi?smart=472:Pfam_2-Hacid_dh_C(168|352)+	D-3-phosphoglycerate dehydrogenase; Belongs to the D-isomer specific 2-hydroxyacid dehydrogenase family	1.1.1.399	1.1.1.95	3511250	AFUA_5G05500	CADAFUBG00005286	CADAFUBG00005286	CADAFUBP00005195	CADAFUBP00005195	CADAFUBT00005286	CADAFUBT00005286	D-3-phosphoglycerate dehydrogenase	D-3-phosphoglycerate dehydrogenase	D-3-phosphoglycerate dehydrogenase	EC 1.1.1.399	EC 1.1.1.95	Q4WTN4	Q4WTN4_ASPFU	XP_754080	XP_754080.1	afm:AFUA_5G05500
CADAFUBP00005211	746128.CADAFUBP00005211	https://smart.embl.de/smart/DDvec.cgi?smart=464:eRF1_1(8|142)+Pfam_eRF1_2(146|278)+Pfam_eRF1_3(281|417)+	Peptide chain release factor eRF/aRF, subunit 1	3510838	AFUA_5G05680	CADAFUBG00005302	CADAFUBG00005302	CADAFUBP00005211	CADAFUBP00005211	CADAFUBT00005302	CADAFUBT00005302	Peptide chain release factor eRF/aRF, subunit 1	Peptide chain release factor eRF/aRF, subunit 1	Peptide chain release factor eRF/aRF, subunit 1	Q4WTQ0	Q4WTQ0_ASPFU	XP_754064	XP_754064.1	afm:AFUA_5G05680
CADAFUBP00005235	746128.CADAFUBP00005235	https://smart.embl.de/smart/DDvec.cgi?smart=699:Pfam_tRNA-synt_2b(254|561)+Pfam_HGTP_anticodon(584|676)+	Glycyl-tRNA synthetase	3510741	6.1.1.14	AFUA_5G05920	CADAFUBG00005326	CADAFUBG00005326	CADAFUBP00005235	CADAFUBP00005235	CADAFUBT00005326	CADAFUBT00005326	EC 6.1.1.14	Glycyl-tRNA synthetase	Glycyl-tRNA synthetase	Glycyl-tRNA synthetase	Q4WTS4	Q4WTS4_ASPFU	XP_754040	XP_754040.1	afm:AFUA_5G05920
TIF6	746128.CADAFUBP00005244	https://smart.embl.de/smart/DDvec.cgi?smart=247:eIF6(3|204)+	Eukaryotic translation initiation factor 6; Binds to the 60S ribosomal subunit and prevents its association with the 40S ribosomal subunit to form the 80S initiation complex in the cytoplasm. Is also involved in ribosome biogenesis. Associates with pre-60S subunits in the nucleus and is involved in its nuclear export; Belongs to the eIF-6 family	3511089	AFUA_5G06010	CADAFUBG00005335	CADAFUBG00005335	CADAFUBP00005244	CADAFUBP00005244	CADAFUBT00005335	CADAFUBT00005335	Eukaryotic translation initiation factor 6	Eukaryotic translation initiation factor 6	Eukaryotic translation initiation factor 6	Q4WTT3	Q4WTT3_ASPFU	TIF6	XP_754031	XP_754031.1	afm:AFUA_5G06010
CADAFUBP00005256	746128.CADAFUBP00005256	https://smart.embl.de/smart/DDvec.cgi?smart=331:CoA_binding(38|134)+Pfam_Ligase_CoA(186|309)+	Succinate--CoA ligase [ADP-forming] subunit alpha, mitochondrial; Succinyl-CoA synthetase functions in the citric acid cycle (TCA), coupling the hydrolysis of succinyl-CoA to the synthesis of ATP and thus represents the only step of substrate- level phosphorylation in the TCA. The alpha subunit of the enzyme binds the substrates coenzyme A and phosphate, while succinate binding and nucleotide spe…	3511183	6.2.1.4	6.2.1.5	AFUA_5G06130	CADAFUBG00005349	CADAFUBG00005349	CADAFUBP00005256	CADAFUBP00005256	CADAFUBT00005349	CADAFUBT00005349	EC 6.2.1.4	EC 6.2.1.5	Q4WTU5	Q4WTU5_ASPFU	Succinyl-CoA synthetase alpha subunit, putative	Succinyl-CoA synthetase alpha subunit, putative	Succinyl-CoA synthetase subunit alpha	XP_754019	XP_754019.1	afm:AFUA_5G06130
CADAFUBP00005292	746128.CADAFUBP00005292	https://smart.embl.de/smart/DDvec.cgi?smart=468:Pfam_Acyl-CoA_dh_N(45|163)+Pfam_Acyl-CoA_dh_M(167|269)+Pfam_Acyl-CoA_dh_2(296|417)+	Acyl-CoA dehydrogenase family protein	1.3.8.7	3510984	AFUA_5G06500	Acyl-CoA dehydrogenase family protein	Acyl-CoA dehydrogenase family protein	Acyl-CoA dehydrogenase family protein	CADAFUBG00005385	CADAFUBG00005385	CADAFUBP00005292	CADAFUBP00005292	CADAFUBT00005385	CADAFUBT00005385	EC 1.3.8.7	Q4WTY1	Q4WTY1_ASPFU	XP_753983	XP_753983.1	afm:AFUA_5G06500
CADAFUBP00005311	746128.CADAFUBP00005311	https://smart.embl.de/smart/DDvec.cgi?smart=499:Pfam_Aminotran_3(66|496)+	4-aminobutyrate transaminase GatA; Belongs to the class-III pyridoxal-phosphate-dependent aminotransferase family	2.6.1.19	2.6.1.22	3511026	4-aminobutyrate transaminase GatA	4-aminobutyrate transaminase GatA	4-aminobutyrate transaminase GatA	AFUA_5G06680	CADAFUBG00005404	CADAFUBG00005404	CADAFUBP00005311	CADAFUBP00005311	CADAFUBT00005404	CADAFUBT00005404	EC 2.6.1.19	EC 2.6.1.22	Q4WTZ9	Q4WTZ9_ASPFU	XP_753965	XP_753965.1	afm:AFUA_5G06680
cpa1	746128.CADAFUBP00005321	https://smart.embl.de/smart/DDvec.cgi?smart=453:CPSase_sm_chain(39|178)+Pfam_GATase(221|399)+	Carbamoyl-phosphate synthase, small subunit; Belongs to the CarA family	3510728	6.3.5.5	AFUA_5G06780	CADAFUBG00005414	CADAFUBG00005414	CADAFUBP00005321	CADAFUBP00005321	CADAFUBT00005414	CADAFUBT00005414	CARA_ASPFU	Carbamoyl-phosphate synthase, small subunit	Carbamoyl-phosphate synthase, small subunit	EC 6.3.5.5	Q4WU09	XP_753955	XP_753955.1	afm:AFUA_5G06780	cpa1
CADAFUBP00005341	746128.CADAFUBP00005341	https://smart.embl.de/smart/DDvec.cgi?smart=360:Pfam_GFO_IDH_MocA(6|126)+Pfam_GFO_IDH_MocA_C(138|269)+	NAD binding Rossmann fold oxidoreductase, putative	3510991	AFUA_5G07000	CADAFUBG00005436	CADAFUBG00005436	CADAFUBP00005341	CADAFUBP00005341	CADAFUBT00005436	CADAFUBT00005436	Q4WU30	Q4WU30_ASPFU	XP_753934	XP_753934.1	afm:AFUA_5G07000
CADAFUBP00005343	746128.CADAFUBP00005343	https://smart.embl.de/smart/DDvec.cgi?smart=622:AAA(114|310)+AAA(428|597)+	ABC transporter, putative	3511058	ABC transporter, putative	ABC transporter, putative	AFUA_5G07020	CADAFUBG00005438	CADAFUBG00005438	CADAFUBP00005343	CADAFUBP00005343	CADAFUBT00005438	CADAFUBT00005438	Q4WU32	Q4WU32_ASPFU	XP_753932	XP_753932.1	afm:AFUA_5G07020
CADAFUBP00005346	746128.CADAFUBP00005346	https://smart.embl.de/smart/DDvec.cgi?smart=508:AAA(285|424)+	Proteasome regulatory particle subunit Rpt2, putative; Belongs to the AAA ATPase family	3511055	AFUA_5G07050	CADAFUBG00005441	CADAFUBG00005441	CADAFUBP00005346	CADAFUBP00005346	CADAFUBT00005441	CADAFUBT00005441	Q4WU35	Q4WU35_ASPFU	XP_753929	XP_753929.1	afm:AFUA_5G07050
CADAFUBP00005353	746128.CADAFUBP00005353	https://smart.embl.de/smart/DDvec.cgi?smart=352:RRM(43|115)+RRM(230|315)+	RNP domain protein	3511037	AFUA_5G07120	CADAFUBG00005448	CADAFUBG00005448	CADAFUBP00005353	CADAFUBP00005353	CADAFUBT00005448	CADAFUBT00005448	Q4WU42	Q4WU42_ASPFU	RNP domain protein	RNP domain protein	RNP domain protein	XP_753922	XP_753922.1	afm:AFUA_5G07120
CADAFUBP00005370	746128.CADAFUBP00005370	https://smart.embl.de/smart/DDvec.cgi?smart=260:ETF(26|223)+	Electron transfer flavoprotein, beta subunit, putative	3511556	AFUA_5G07300	CADAFUBG00005465	CADAFUBG00005465	CADAFUBP00005370	CADAFUBP00005370	CADAFUBT00005465	CADAFUBT00005465	Q4WU60	Q4WU60_ASPFU	XP_753904	XP_753904.1	afm:AFUA_5G07300
CADAFUBP00005425	746128.CADAFUBP00005425	https://smart.embl.de/smart/DDvec.cgi?smart=149:Pfam_SSB(33|133)+	SsDNA binding protein, putative; Single-stranded DNA-binding protein	3510853	AFUA_5G07890	CADAFUBG00005521	CADAFUBG00005521	CADAFUBP00005425	CADAFUBP00005425	CADAFUBT00005521	CADAFUBT00005521	Q4WUB7	Q4WUB7_ASPFU	Single-stranded DNA-binding protein	Single-stranded DNA-binding protein	SsDNA binding protein, putative	XP_753847	XP_753847.2	afm:AFUA_5G07890
CADAFUBP00005467	746128.CADAFUBP00005467	https://smart.embl.de/smart/DDvec.cgi?smart=283:Pfam_Aldo_ket_red(30|270)+	Aldo-keto reductase, putative	3511269	AFUA_5G08290	Aldo-keto reductase, putative	Aldo-keto reductase, putative	Aldo-keto reductase, putative	CADAFUBG00005563	CADAFUBG00005563	CADAFUBP00005467	CADAFUBP00005467	CADAFUBT00005563	CADAFUBT00005563	Q4WUF7	Q4WUF7_ASPFU	XP_753807	XP_753807.1	afm:AFUA_5G08290
CADAFUBP00005490	746128.CADAFUBP00005490	https://smart.embl.de/smart/DDvec.cgi?smart=354:Pfam_Septin(67|271)+COIL(281|344)+	Septin AspA, putative; Belongs to the TRAFAC class TrmE-Era-EngA-EngB-Septin- like GTPase superfamily. Septin GTPase family	3511511	AFUA_5G08540	CADAFUBG00005587	CADAFUBG00005587	CADAFUBP00005490	CADAFUBP00005490	CADAFUBT00005587	CADAFUBT00005587	Q4WUI1	Q4WUI1_ASPFU	Septin AspA, putative	Septin AspA, putative	Septin AspA, putative	XP_753783	XP_753783.1	afm:AFUA_5G08540
CADAFUBP00005518	746128.CADAFUBP00005518	http://smart.embl.de/smart/DDt.cgi?smart=537:	Woronin body protein HexA, putative	3510955	AFUA_5G08830	CADAFUBG00005615	CADAFUBG00005615	CADAFUBP00005518	CADAFUBP00005518	CADAFUBT00005615	CADAFUBT00005615	Q4WUL0	Q4WUL0_ASPFU	Woronin body protein HexA, putative	Woronin body protein HexA, putative	Woronin body protein HexA, putative	XP_753754	XP_753754.2	afm:AFUA_5G08830
CADAFUBP00005528	746128.CADAFUBP00005528	https://smart.embl.de/smart/DDvec.cgi?smart=462:Pfam_Acyl-CoA_dh_N(79|192)+Pfam_Acyl-CoA_dh_M(196|291)+Pfam_Acyl-CoA_dh_2(318|447)+	Isovaleryl-CoA dehydrogenase IvdA, putative	1.3.8.4	3511667	AFUA_5G08930	CADAFUBG00005625	CADAFUBG00005625	CADAFUBP00005528	CADAFUBP00005528	CADAFUBT00005625	CADAFUBT00005625	EC 1.3.8.4	Isovaleryl-CoA dehydrogenase IvdA, putative	Isovaleryl-CoA dehydrogenase IvdA, putative	Isovaleryl-CoA dehydrogenase IvdA, putative	Q4WUM0	Q4WUM0_ASPFU	XP_753744	XP_753744.1	afm:AFUA_5G08930
mpkC	746128.CADAFUBP00005546	https://smart.embl.de/smart/DDvec.cgi?smart=378:S_TKc(20|300)+	Mitogen-activated protein kinase mpkC; Mitogen-activated protein kinase required for growth on media where sorbitol or mannitol is the sole carbon source; Belongs to the protein kinase superfamily. Ser/Thr protein kinase family. MAP kinase subfamily. HOG1 sub-subfamily	2.7.11.24	3510755	AFUA_5G09100	CADAFUBG00005643	CADAFUBG00005643	CADAFUBP00005546	CADAFUBP00005546	CADAFUBT00005643	CADAFUBT00005643	EC 2.7.11.24	MAP kinase MpkC	MAP kinase MpkC	MPKC_ASPFU	Mitogen-activated protein kinase mpkC	Q208R1	Q4WUN7	XP_753727	XP_753727.2	afm:AFUA_5G09100	mpkC
alp2	746128.CADAFUBP00005557	https://smart.embl.de/smart/DDvec.cgi?smart=495:SIGNAL(1|16)+Pfam_Inhibitor_I9(43|136)+Pfam_Peptidase_S8(173|452)+	Alkaline protease 2; Alkaline protease that allows assimilation of proteinaceous substrates. Acts as a significant virulence factor in invasive aspergillosis. Required for regular sporulation	3.4.21.48	3510885	AFUA_5G09210	ALP2_ASPFU	Alkaline protease 2	Alkaline protease 2	Alkaline protease 2	Asp f 18	Autophagic serine protease alp2	CADAFUBG00005654	CADAFUBG00005654	CADAFUBP00005557	CADAFUBP00005557	CADAFUBT00005654	CADAFUBT00005654	E9QST4	EC 3.4.21.48	P87184	Q4WUP6	XP_753718	XP_753718.1	afm:AFUA_5G09210	alp2
sodC	746128.CADAFUBP00005560	https://smart.embl.de/smart/DDvec.cgi?smart=158:Pfam_Sod_Cu(12|154)+	Superoxide dismutase [Cu-Zn]; Destroys radicals which are normally produced within the cells and which are toxic to biological systems; Belongs to the Cu-Zn superoxide dismutase family	1.15.1.1	3511006	AFUA_5G09240	CADAFUBG00005657	CADAFUBG00005657	CADAFUBP00005560	CADAFUBP00005560	CADAFUBT00005657	CADAFUBT00005657	EC 1.15.1.1	Q4WUP9	Q8X1S8	Q9Y8D9	SODC_ASPFU	Superoxide dismutase	Superoxide dismutase	Superoxide dismutase [Cu-Zn]	XP_753715	XP_753715.1	afm:AFUA_5G09240	sodC
CADAFUBP00005576	746128.CADAFUBP00005576	https://smart.embl.de/smart/DDvec.cgi?smart=294:Pfam_adh_short(34|247)+	Carbonyl reductase, putative	1.1.1.289	3511123	AFUA_5G09400	CADAFUBG00005673	CADAFUBG00005673	CADAFUBP00005576	CADAFUBP00005576	CADAFUBT00005673	CADAFUBT00005673	Carbonyl reductase, putative	Carbonyl reductase, putative	Carbonyl reductase, putative	EC 1.1.1.289	Q4WUR5	Q4WUR5_ASPFU	XP_753699	XP_753699.1	afm:AFUA_5G09400
CADAFUBP00005621	746128.CADAFUBP00005621	https://smart.embl.de/smart/DDvec.cgi?smart=287:Pfam_Esterase_phd(30|185)+	S-formylglutathione hydrolase; Serine hydrolase involved in the detoxification of formaldehyde	3.1.2.12	3511548	AFUA_5G09860	CADAFUBG00005721	CADAFUBG00005721	CADAFUBP00005621	CADAFUBP00005621	CADAFUBT00005721	CADAFUBT00005721	EC 3.1.2.12	Esterase, putative	Esterase, putative	Q4WUW0	Q4WUW0_ASPFU	S-formylglutathione hydrolase	XP_753654	XP_753654.1	afm:AFUA_5G09860
CADAFUBP00005627	746128.CADAFUBP00005627	https://smart.embl.de/smart/DDvec.cgi?smart=217:Pfam_Nitroreductase(20|195)+	Nitroreductase family protein, putative	3511399	AFUA_5G09910	CADAFUBG00005729	CADAFUBG00005729	CADAFUBP00005627	CADAFUBP00005627	CADAFUBT00005729	CADAFUBT00005729	Nitroreductase family protein, putative	Nitroreductase family protein, putative	Nitroreductase family protein, putative	Q4WUW5	Q4WUW5_ASPFU	XP_753649	XP_753649.1	afm:AFUA_5G09910
CADAFUBP00005670	746128.CADAFUBP00005670	https://smart.embl.de/smart/DDvec.cgi?smart=299:Pfam_Fer2_3(68|175)+Pfam_Fer4_8(208|283)+	Succinate dehydrogenase [ubiquinone] iron-sulfur subunit, mitochondrial; Iron-sulfur protein (IP) subunit of succinate dehydrogenase (SDH) that is involved in complex II of the mitochondrial electron transport chain and is responsible for transferring electrons from succinate to ubiquinone (coenzyme Q)	1.3.5.1	3511321	AFUA_5G10370	CADAFUBG00005775	CADAFUBG00005775	CADAFUBP00005670	CADAFUBP00005670	CADAFUBT00005775	CADAFUBT00005775	EC 1.3.5.1	Q4WV09	Q4WV09_ASPFU	XP_753605	XP_753605.1	afm:AFUA_5G10370
CADAFUBP00005690	746128.CADAFUBP00005690	https://smart.embl.de/smart/DDvec.cgi?smart=196:Pfam_COX4(55|191)+	Cytochrome c oxidase subunit V	3510978	AFUA_5G10560	CADAFUBG00005797	CADAFUBG00005797	CADAFUBP00005690	CADAFUBP00005690	CADAFUBT00005797	CADAFUBT00005797	Cytochrome c oxidase subunit V	Cytochrome c oxidase subunit V	Cytochrome c oxidase subunit V	Q4WV26	Q4WV26_ASPFU	XP_753588	XP_753588.1	afm:AFUA_5G10560
CADAFUBP00005691	746128.CADAFUBP00005691	https://smart.embl.de/smart/DDvec.cgi?smart=159:ADF(16|153)+	Cofilin; Belongs to the actin-binding proteins ADF family	3510977	AFUA_5G10570	CADAFUBG00005798	CADAFUBG00005798	CADAFUBP00005691	CADAFUBP00005691	CADAFUBT00005798	CADAFUBT00005798	Cofilin	Cofilin	Cofilin	Q4WV27	Q4WV27_ASPFU	XP_753587	XP_753587.1	afm:AFUA_5G10570
CADAFUBP00005695	746128.CADAFUBP00005695	https://smart.embl.de/smart/DDvec.cgi?smart=298:Pfam_UCR_TM(115|169)+Pfam_Rieske(180|287)+	Ubiquinol-cytochrome c reductase iron-sulfur subunit	1.10.2.2	3510973	AFUA_5G10610	CADAFUBG00005802	CADAFUBG00005802	CADAFUBP00005695	CADAFUBP00005695	CADAFUBT00005802	CADAFUBT00005802	EC 1.10.2.2	Q4WV31	Q4WV31_ASPFU	XP_753583	XP_753583.1	afm:AFUA_5G10610
CADAFUBP00005698	746128.CADAFUBP00005698	https://smart.embl.de/smart/DDvec.cgi?smart=391:Pfam_tRNA-synt_1b(31|328)+	Tyrosine--tRNA ligase; Tyrosyl-tRNA synthetase	3510945	6.1.1.1	AFUA_5G10640	CADAFUBG00005805	CADAFUBG00005805	CADAFUBP00005698	CADAFUBP00005698	CADAFUBT00005805	CADAFUBT00005805	EC 6.1.1.1	Q4WV34	Q4WV34_ASPFU	Tyrosine--tRNA ligase	Tyrosyl-tRNA synthetase	Tyrosyl-tRNA synthetase	Tyrosyl-tRNA synthetase	XP_753580	XP_753580.1	afm:AFUA_5G10640
CADAFUBP00005699	746128.CADAFUBP00005699	https://smart.embl.de/smart/DDvec.cgi?smart=412:Pfam_PNP_phzG_C(365|412)+	Pyridoxamine phosphate oxidase, putative	1.4.3.5	3510944	AFUA_5G10650	CADAFUBG00005806	CADAFUBG00005806	CADAFUBP00005699	CADAFUBP00005699	CADAFUBT00005806	CADAFUBT00005806	EC 1.4.3.5	Pyridoxamine phosphate oxidase, putative	Pyridoxamine phosphate oxidase, putative	Pyridoxamine phosphate oxidase, putative	Q4WV35	Q4WV35_ASPFU	XP_753579	XP_753579.1	afm:AFUA_5G10650
CADAFUBP00005733	746128.CADAFUBP00005733	https://smart.embl.de/smart/DDvec.cgi?smart=342:Pfam_Pantoate_ligase(9|337)+	Pantoate--beta-alanine ligase	3510906	6.3.2.1	AFUA_5G11040	CADAFUBG00005840	CADAFUBG00005840	CADAFUBP00005733	CADAFUBP00005733	CADAFUBT00005840	CADAFUBT00005840	EC 6.3.2.1	Pantoate--beta-alanine ligase	Pantoate--beta-alanine ligase	Pantoate--beta-alanine ligase	Q4WV70	Q4WV70_ASPFU	XP_753544	XP_753544.1	afm:AFUA_5G11040
CADAFUBP00005752	746128.CADAFUBP00005752	https://smart.embl.de/smart/DDvec.cgi?smart=273:Pfam_KR(53|232)+	Oxidoreductase, short chain dehydrogenase/reductase family; Belongs to the short-chain dehydrogenases/reductases (SDR) family	1.1.1.-	1.1.1.381	3510988	AFUA_5G11240	CADAFUBG00005859	CADAFUBG00005859	CADAFUBP00005752	CADAFUBP00005752	CADAFUBT00005859	CADAFUBT00005859	EC 1.1.1.-	EC 1.1.1.381	Q4WV89	Q4WV89_ASPFU	XP_753525	XP_753525.1	afm:AFUA_5G11240
CADAFUBP00005768	746128.CADAFUBP00005768	https://smart.embl.de/smart/DDvec.cgi?smart=197:Pfam_Rho_GDI(1|196)+	Rho-gdp dissociation inhibitor	3511078	AFUA_5G11380	CADAFUBG00005875	CADAFUBG00005875	CADAFUBP00005768	CADAFUBP00005768	CADAFUBT00005875	CADAFUBT00005875	Q4WVA3	Q4WVA3_ASPFU	Rho-gdp dissociation inhibitor	Rho-gdp dissociation inhibitor	Rho-gdp dissociation inhibitor	XP_753511	XP_753511.1	afm:AFUA_5G11380
CADAFUBP00005806	746128.CADAFUBP00005806	https://smart.embl.de/smart/DDvec.cgi?smart=341:Pfam_Porphobil_deam(19|234)+Pfam_Porphobil_deamC(245|324)+	Hydroxymethylbilane synthase, putative	2.5.1.61	3511516	AFUA_5G11760	CADAFUBG00005913	CADAFUBG00005913	CADAFUBP00005806	CADAFUBP00005806	CADAFUBT00005913	CADAFUBT00005913	EC 2.5.1.61	Hydroxymethylbilane synthase, putative	Hydroxymethylbilane synthase, putative	Hydroxymethylbilane synthase, putative	Q4WVE1	Q4WVE1_ASPFU	XP_753473	XP_753473.1	afm:AFUA_5G11760
CADAFUBP00005847	746128.CADAFUBP00005847	https://smart.embl.de/smart/DDvec.cgi?smart=506:TRANS(48|70)+Pfam_Glyco_transf_15(89|425)+	Alpha-1,2-mannosyltransferase (Kre5), putative	2.4.1.-	3511652	AFUA_5G12160	Alpha-1,2-mannosyltransferase (Kre5), putative	Alpha-1,2-mannosyltransferase (Kre5), putative	Alpha-1,2-mannosyltransferase (Kre5), putative	CADAFUBG00005955	CADAFUBG00005955	CADAFUBP00005847	CADAFUBP00005847	CADAFUBT00005955	CADAFUBT00005955	EC 2.4.1.-	Q4WVH9	Q4WVH9_ASPFU	XP_753435	XP_753435.1	afm:AFUA_5G12160
CADAFUBP00005857	746128.CADAFUBP00005857	https://smart.embl.de/smart/DDvec.cgi?smart=368:Pfam_OST3_OST6(18|150)+Pfam_Thioredoxin_2(157|249)+Pfam_ERp29(268|356)+	Disulfide isomerase (TigA), putative; Belongs to the protein disulfide isomerase family	3511390	5.3.4.1	AFUA_5G12260	CADAFUBG00005969	CADAFUBG00005969	CADAFUBP00005857	CADAFUBP00005857	CADAFUBT00005969	CADAFUBT00005969	Disulfide isomerase (TigA), putative	Disulfide isomerase (TigA), putative	Disulfide isomerase (TigA), putative	EC 5.3.4.1	Q4WVI9	Q4WVI9_ASPFU	XP_753425	XP_753425.1	afm:AFUA_5G12260
CADAFUBP00005886	746128.CADAFUBP00005886	https://smart.embl.de/smart/DDvec.cgi?smart=83:Sm(17|63)+	U6 small nuclear ribonucleoprotein (Lsm3), putative	3511289	AFUA_5G12570	CADAFUBG00006003	CADAFUBG00006003	CADAFUBP00005886	CADAFUBP00005886	CADAFUBT00006003	CADAFUBT00006003	Q4WVL8	Q4WVL8_ASPFU	XP_753396	XP_753396.1	afm:AFUA_5G12570
CADAFUBP00005908	746128.CADAFUBP00005908	https://smart.embl.de/smart/DDvec.cgi?smart=332:Pfam_Kelch_3(30|84)+Pfam_Kelch_3(85|140)+Pfam_Kelch_4(131|181)+Pfam_Kelch_4(263|296)+	Kelch repeat protein	3511682	AFUA_5G12780	CADAFUBG00006025	CADAFUBG00006025	CADAFUBP00005908	CADAFUBP00005908	CADAFUBT00006025	CADAFUBT00006025	Kelch repeat protein	Kelch repeat protein	Kelch repeat protein	Q4WVN9	Q4WVN9_ASPFU	XP_753375	XP_753375.1	afm:AFUA_5G12780
CADAFUBP00005919	746128.CADAFUBP00005919	https://smart.embl.de/smart/DDvec.cgi?smart=512:COIL(34|66)+Pfam_MFAP1(149|380)+	Microfibrillar-associated protein MfaP1, putative	3510916	AFUA_5G12890	CADAFUBG00006040	CADAFUBG00006040	CADAFUBP00005919	CADAFUBP00005919	CADAFUBT00006040	CADAFUBT00006040	Q4WVQ0	Q4WVQ0_ASPFU	XP_753364	XP_753364.1	afm:AFUA_5G12890
CADAFUBP00006019	746128.CADAFUBP00006019	https://smart.embl.de/smart/DDvec.cgi?smart=201:Pfam_CS(6|89)+	Hsp90 binding co-chaperone (Sba1), putative	3510713	AFUA_5G13920	CADAFUBG00006141	CADAFUBG00006141	CADAFUBP00006019	CADAFUBP00006019	CADAFUBT00006141	CADAFUBT00006141	Hsp90 binding co-chaperone (Sba1), putative	Hsp90 binding co-chaperone (Sba1), putative	Hsp90 binding co-chaperone (Sba1), putative	Q4WW00	Q4WW00_ASPFU	XP_753264	XP_753264.1	afm:AFUA_5G13920
CADAFUBP00006202	746128.CADAFUBP00006202	https://smart.embl.de/smart/DDvec.cgi?smart=859:Pfam_ATP-cone(1|89)+Pfam_Ribonuc_red_lgN(141|213)+Pfam_Ribonuc_red_lgC(216|739)+	Ribonucleoside-diphosphate reductase; Provides the precursors necessary for DNA synthesis. Catalyzes the biosynthesis of deoxyribonucleotides from the corresponding ribonucleotides	1.17.4.1	3509243	AFUA_4G06690	CADAFUBG00006325	CADAFUBG00006325	CADAFUBP00006202	CADAFUBP00006202	CADAFUBT00006325	CADAFUBT00006325	EC 1.17.4.1	Q4WNR5	Q4WNR5_ASPFU	Ribonucleoside-diphosphate reductase	Ribonucleoside-diphosphate reductase	Ribonucleoside-diphosphate reductase	XP_752157	XP_752157.1	afm:AFUA_4G06690
CADAFUBP00006222	746128.CADAFUBP00006222	https://smart.embl.de/smart/DDvec.cgi?smart=515:TRANS(7|29)+Pfam_p450(37|505)+	14-alpha sterol demethylase Cyp51A; Belongs to the cytochrome P450 family	1.14.13.70	14-alpha sterol demethylase Cyp51A	14-alpha sterol demethylase Cyp51A	14-alpha sterol demethylase Cyp51A	3509526	AFUA_4G06890	CADAFUBG00006345	CADAFUBG00006345	CADAFUBP00006222	CADAFUBP00006222	CADAFUBT00006345	CADAFUBT00006345	EC 1.14.13.70	Q4WNT5	Q4WNT5_ASPFU	XP_752137	XP_752137.1	afm:AFUA_4G06890
CADAFUBP00006223	746128.CADAFUBP00006223	https://smart.embl.de/smart/DDvec.cgi?smart=639:Pfam_GATase_6(96|208)+Pfam_Asn_synthase(258|437)+Pfam_Asn_synthase(431|605)+	Asparagine synthetase	3509525	6.3.5.4	AFUA_4G06900	Asparagine synthetase	Asparagine synthetase	Asparagine synthetase Asn2, putative	CADAFUBG00006346	CADAFUBG00006346	CADAFUBP00006223	CADAFUBP00006223	CADAFUBT00006346	CADAFUBT00006346	EC 6.3.5.4	Q4WNT6	Q4WNT6_ASPFU	XP_752136	XP_752136.1	afm:AFUA_4G06900
CADAFUBP00006247	746128.CADAFUBP00006247	https://smart.embl.de/smart/DDvec.cgi?smart=404:Pfam_GHMP_kinases_N(113|171)+	Diphosphomevalonate decarboxylase; Belongs to the diphosphomevalonate decarboxylase family	3509586	4.1.1.33	AFUA_4G07130	CADAFUBG00006371	CADAFUBG00006371	CADAFUBP00006247	CADAFUBP00006247	CADAFUBT00006371	CADAFUBT00006371	Diphosphomevalonate decarboxylase	Diphosphomevalonate decarboxylase	Diphosphomevalonate decarboxylase	EC 4.1.1.33	Mevalonate pyrophosphate decarboxylase	Q4WNV9	Q4WNV9_ASPFU	XP_752113	XP_752113.1	afm:AFUA_4G07130
CADAFUBP00006253	746128.CADAFUBP00006253	https://smart.embl.de/smart/DDvec.cgi?smart=371:Pfam_OTCace_N(46|190)+Pfam_OTCace(205|363)+	Ornithine carbamoyltransferase; Belongs to the ATCase/OTCase family	2.1.3.3	3509574	AFUA_4G07190	CADAFUBG00006377	CADAFUBG00006377	CADAFUBP00006253	CADAFUBP00006253	CADAFUBT00006377	CADAFUBT00006377	EC 2.1.3.3	Ornithine carbamoyltransferase	Ornithine carbamoyltransferase	Ornithine carbamoyltransferase	Q4WNW5	Q4WNW5_ASPFU	XP_752107	XP_752107.1	afm:AFUA_4G07190
CADAFUBP00006255	746128.CADAFUBP00006255	https://smart.embl.de/smart/DDvec.cgi?smart=327:Pfam_ACT_5(101|163)+Pfam_ALS_ss_C(235|301)+	Mitochondrial acetolactate synthase small subunit, putative	2.2.1.6	3509565	AFUA_4G07210	CADAFUBG00006379	CADAFUBG00006379	CADAFUBP00006255	CADAFUBP00006255	CADAFUBT00006379	CADAFUBT00006379	EC 2.2.1.6	Q4WNW7	Q4WNW7_ASPFU	XP_752105	XP_752105.1	afm:AFUA_4G07210
CADAFUBP00006292	746128.CADAFUBP00006292	https://smart.embl.de/smart/DDvec.cgi?smart=516:Pfam_GTP_EFTU(86|292)+Pfam_GTP_EFTU_D2(323|406)+Pfam_eIF2_C(416|505)+	Translation initiation factor EF-2 gamma subunit, putative	3508972	AFUA_4G07580	CADAFUBG00006416	CADAFUBG00006416	CADAFUBP00006292	CADAFUBP00006292	CADAFUBT00006416	CADAFUBT00006416	Q4WP05	Q4WP05_ASPFU	XP_752067	XP_752067.2	afm:AFUA_4G07580
cpr2	746128.CADAFUBP00006300	https://smart.embl.de/smart/DDvec.cgi?smart=209:SIGNAL(1|23)+Pfam_Pro_isomerase(39|196)+	Peptidyl-prolyl cis-trans isomerase B; PPIases accelerate the folding of proteins. It catalyzes the cis-trans isomerization of proline imidic peptide bonds in oligopeptides (By similarity); Belongs to the cyclophilin-type PPIase family. PPIase B subfamily	3509715	5.2.1.8	AFUA_4G07650	CADAFUBG00006424	CADAFUBG00006424	CADAFUBP00006300	CADAFUBP00006300	CADAFUBT00006424	CADAFUBT00006424	EC 5.2.1.8	PPIB_ASPFU	Peptidyl-prolyl cis-trans isomerase	Peptidyl-prolyl cis-trans isomerase	Peptidyl-prolyl cis-trans isomerase B	Q4WP12	Rotamase B	XP_752060	XP_752060.1	afm:AFUA_4G07650	cpr2
cym1	746128.CADAFUBP00006327	https://smart.embl.de/smart/DDvec.cgi?smart=1065:Pfam_Peptidase_M16(100|196)+Pfam_Peptidase_M16_C(266|453)+M16C_associated(523|781)+	Mitochondrial presequence protease; ATP-independent protease that degrades mitochondrial transit peptides after their cleavage. Also degrades other unstructured peptides (By similarity); Belongs to the peptidase M16 family. PreP subfamily	3.4.24.-	3508886	AFUA_4G07910	CADAFUBG00006452	CADAFUBG00006452	CADAFUBP00006327	CADAFUBP00006327	CADAFUBT00006452	CADAFUBT00006452	CYM1_ASPFU	EC 3.4.24.-	Mitochondrial presequence protease	Q4WP38	XP_752034	XP_752034.1	afm:AFUA_4G07910	cym1
CADAFUBP00006405	746128.CADAFUBP00006405	https://smart.embl.de/smart/DDvec.cgi?smart=287:Pfam_KR(36|206)+	Short chain dehydrogenase, putative	3509320	AFUA_4G08710	CADAFUBG00006530	CADAFUBG00006530	CADAFUBP00006405	CADAFUBP00006405	CADAFUBT00006530	CADAFUBT00006530	Q4WPB8	Q4WPB8_ASPFU	Short chain dehydrogenase, putative	Short chain dehydrogenase, putative	Short chain dehydrogenase, putative	XP_751954	XP_751954.1	afm:AFUA_4G08710
CADAFUBP00006437	746128.CADAFUBP00006437	https://smart.embl.de/smart/DDvec.cgi?smart=953:Pfam_Peptidase_M1(298|534)+Pfam_ERAP1_C(608|926)+	Aminopeptidase	3.4.11.-	3509451	AFUA_4G09030	Aminopeptidase	Aminopeptidase	Aminopeptidase	CADAFUBG00006563	CADAFUBG00006563	CADAFUBP00006437	CADAFUBP00006437	CADAFUBT00006563	CADAFUBT00006563	EC 3.4.11.-	Q4WPF0	Q4WPF0_ASPFU	XP_751922	XP_751922.1	afm:AFUA_4G09030
ccp1	746128.CADAFUBP00006445	https://smart.embl.de/smart/DDvec.cgi?smart=366:Pfam_peroxidase(97|330)+	Cytochrome c peroxidase, mitochondrial; Destroys radicals which are normally produced within the cells and which are toxic to biological systems	1.11.1.5	3509520	AFUA_4G09110	CADAFUBG00006571	CADAFUBG00006571	CADAFUBP00006445	CADAFUBP00006445	CADAFUBT00006571	CADAFUBT00006571	CCPR_ASPFU	Cytochrome c peroxidase Ccp1, putative	Cytochrome c peroxidase Ccp1, putative	Cytochrome c peroxidase, mitochondrial	EC 1.11.1.5	Q4WPF8	XP_751914	XP_751914.1	afm:AFUA_4G09110	ccp1
CADAFUBP00006504	746128.CADAFUBP00006504	https://smart.embl.de/smart/DDvec.cgi?smart=567:Pfam_Cpn60_TCP1(38|551)+	T-complex protein 1, theta subunit, putative; Molecular chaperone; assists the folding of proteins upon ATP hydrolysis	3509297	AFUA_4G09740	CADAFUBG00006632	CADAFUBG00006632	CADAFUBP00006504	CADAFUBP00006504	CADAFUBT00006632	CADAFUBT00006632	Q4WPM0	Q4WPM0_ASPFU	T-complex protein 1, theta subunit, putative	T-complex protein 1, theta subunit, putative	T-complex protein 1, theta subunit, putative	XP_751852	XP_751852.1	afm:AFUA_4G09740
CADAFUBP00006535	746128.CADAFUBP00006535	https://smart.embl.de/smart/DDvec.cgi?smart=149:EFh(12|40)+EFh(48|76)+EFh(85|113)+EFh(121|149)+	Calmodulin	3509718	AFUA_4G10050	CADAFUBG00006663	CADAFUBG00006663	CADAFUBP00006535	CADAFUBP00006535	CADAFUBT00006663	CADAFUBT00006663	Calmodulin	Calmodulin	Calmodulin	Q4WPQ1	Q4WPQ1_ASPFU	XP_751821	XP_751821.2	afm:AFUA_4G10050
CADAFUBP00006583	746128.CADAFUBP00006583	https://smart.embl.de/smart/DDvec.cgi?smart=832:BROMO(280|387)+BROMO(474|583)+COIL(602|642)+Pfam_BET(686|750)+	Transcription regulator BDF1, putative	3509353	AFUA_4G10540	CADAFUBG00006711	CADAFUBG00006711	CADAFUBP00006583	CADAFUBP00006583	CADAFUBT00006711	CADAFUBT00006711	Q4WPV0	Q4WPV0_ASPFU	Transcription regulator BDF1, putative	Transcription regulator BDF1, putative	Transcription regulator BDF1, putative	XP_751772	XP_751772.1	afm:AFUA_4G10540
rvb1	746128.CADAFUBP00006600	https://smart.embl.de/smart/DDvec.cgi?smart=458:AAA(63|352)+	RuvB-like helicase 1; DNA helicase which participates in several chromatin remodeling complexes, including the SWR1 and the INO80 complexes. The SWR1 complex mediates the ATP-dependent exchange of histone H2A for the H2A variant HZT1 leading to transcriptional regulation of selected genes by chromatin remodeling. The INO80 complex remodels chromatin by shifting nucleosomes and is involved in DNA …	3509332	AAA family ATPase Pontin, putative	AAA family ATPase Pontin, putative	AFUA_4G10730	CADAFUBG00006728	CADAFUBG00006728	CADAFUBP00006600	CADAFUBP00006600	CADAFUBT00006728	CADAFUBT00006728	Q4WPW8	RUVB1_ASPFU	RuvB-like helicase 1	XP_751754	XP_751754.1	afm:AFUA_4G10730	rvb1
CADAFUBP00006605	746128.CADAFUBP00006605	https://smart.embl.de/smart/DDvec.cgi?smart=4037:Pfam_DUF908(119|488)+Pfam_DUF913(552|1002)+COIL(2827|2894)+Pfam_DUF4414(2944|3053)+HECTc(3699|4037)+	Ubiquitin-protein ligase (Tom1), putative	2.3.2.26	3509288	AFUA_4G10780	CADAFUBG00006733	CADAFUBG00006733	CADAFUBP00006605	CADAFUBP00006605	CADAFUBT00006733	CADAFUBT00006733	EC 2.3.2.26	Q4WPX3	Q4WPX3_ASPFU	Ubiquitin-protein ligase (Tom1), putative	Ubiquitin-protein ligase (Tom1), putative	Ubiquitin-protein ligase (Tom1), putative	XP_751749	XP_751749.1	afm:AFUA_4G10780
CADAFUBP00006656	746128.CADAFUBP00006656	https://smart.embl.de/smart/DDvec.cgi?smart=379:Aha1_N(13|146)+Pfam_AHSA1(203|323)+TRANS(346|368)+	Aha1 domain family	3509161	AFUA_4G11330	Aha1 domain family	Aha1 domain family	Aha1 domain family	CADAFUBG00006784	CADAFUBG00006784	CADAFUBP00006656	CADAFUBP00006656	CADAFUBT00006784	CADAFUBT00006784	Q4WQ26	Q4WQ26_ASPFU	XP_751696	XP_751696.1	afm:AFUA_4G11330
CADAFUBP00006657	746128.CADAFUBP00006657	https://smart.embl.de/smart/DDvec.cgi?smart=450:Pfam_Sacchrp_dh_NADP(10|124)+Pfam_Sacchrp_dh_C(128|443)+	Saccharopine dehydrogenase	1.5.1.10	3509160	AFUA_4G11340	CADAFUBG00006785	CADAFUBG00006785	CADAFUBP00006657	CADAFUBP00006657	CADAFUBT00006785	CADAFUBT00006785	EC 1.5.1.10	Q4WQ27	Q4WQ27_ASPFU	Saccharopine dehydrogenase	Saccharopine dehydrogenase	Saccharopine dehydrogenase Lys9, putative	XP_751695	XP_751695.1	afm:AFUA_4G11340
mpg1	746128.CADAFUBP00006673	https://smart.embl.de/smart/DDvec.cgi?smart=373:Pfam_NTP_transferase(11|245)+Pfam_Hexapep_2(272|301)+	Mannose-1-phosphate guanyltransferase; Involved in cell wall synthesis where it is required for glycosylation. Involved in cell cycle progression through cell- size checkpoint (By similarity); Belongs to the transferase hexapeptide repeat family	2.7.7.13	3509467	AFUA_4G11510	CADAFUBG00006801	CADAFUBG00006801	CADAFUBP00006673	CADAFUBP00006673	CADAFUBT00006801	CADAFUBT00006801	EC 2.7.7.13	GDP-mannose pyrophosphorylase	GTP-mannose-1-phosphate guanylyltransferase	MPG1_ASPFU	Mannose-1-phosphate guanyltransferase	Mannose-1-phosphate guanylyltransferase	Mannose-1-phosphate guanylyltransferase	Q4U3E8	Q4WQ43	XP_751679	XP_751679.1	afm:AFUA_4G11510	mpg1
CADAFUBP00006679	746128.CADAFUBP00006679	https://smart.embl.de/smart/DDvec.cgi?smart=3187:Pfam_Chorein_N(2|116)+Pfam_VPS13(139|376)+Pfam_VPS13_mid_rpt(590|826)+Pfam_SHR-BD(2237|2517)+Pfam_VPS13_C(2766|2942)+	Vacuolar protein sorting-associated protein; May be involved in recycling of membrane proteins between an endocytic compartment and the TGN	3509549	AFUA_4G11560	CADAFUBG00006807	CADAFUBG00006807	CADAFUBP00006679	CADAFUBP00006679	CADAFUBT00006807	CADAFUBT00006807	Q4WQ48	Q4WQ48_ASPFU	Vacuolar protein sorting-associated protein	XP_751674	XP_751674.1	afm:AFUA_4G11560
CADAFUBP00006711	746128.CADAFUBP00006711	https://smart.embl.de/smart/DDvec.cgi?smart=841:TPR(77|110)+TPR(221|254)+TPR(374|409)+TPR(674|707)+	N-terminal acetyltransferase catalytic subunit (NAT1), putative	3509145	AFUA_4G11910	CADAFUBG00006839	CADAFUBG00006839	CADAFUBP00006711	CADAFUBP00006711	CADAFUBT00006839	CADAFUBT00006839	Q4WQ83	Q4WQ83_ASPFU	XP_751639	XP_751639.1	afm:AFUA_4G11910
CADAFUBP00006796	746128.CADAFUBP00006796	https://smart.embl.de/smart/DDvec.cgi?smart=563:SIGNAL(1|23)+Pfam_Calreticulin(50|417)+TRANS(494|516)+	Calnexin homolog; Interacts with newly synthesized glycoproteins in the endoplasmic reticulum. It may act in assisting protein assembly and/or in the retention within the ER of unassembled protein subunits. It seems to play a major role in the quality control apparatus of the ER by the retention of incorrectly folded proteins (By similarity)	3509033	AFUA_4G12850	CADAFUBG00006924	CADAFUBG00006924	CADAFUBP00006796	CADAFUBP00006796	CADAFUBT00006924	CADAFUBT00006924	CALX_ASPFU	Calnexin	Calnexin	Calnexin homolog	Q4WQH5	Q6Q487	XP_751547	XP_751547.1	afm:AFUA_4G12850
CADAFUBP00006797	746128.CADAFUBP00006797	https://smart.embl.de/smart/DDvec.cgi?smart=602:Pfam_Aldedh(115|580)+	Methylmalonate-semialdehyde dehydrogenase, putative	1.2.1.18	1.2.1.27	3509031	AFUA_4G12870	CADAFUBG00006925	CADAFUBG00006925	CADAFUBP00006797	CADAFUBP00006797	CADAFUBT00006925	CADAFUBT00006925	EC 1.2.1.18	EC 1.2.1.27	Q4WQH7	Q4WQH7_ASPFU	XP_751545	XP_751545.1	afm:AFUA_4G12870
CADAFUBP00006802	746128.CADAFUBP00006802	https://smart.embl.de/smart/DDvec.cgi?smart=604:Pfam_tRNA-synt_His(85|376)+Pfam_HGTP_anticodon(467|568)+	Histidyl-tRNA synthetase, mitochondrial	3509099	6.1.1.21	AFUA_4G12920	CADAFUBG00006930	CADAFUBG00006930	CADAFUBP00006802	CADAFUBP00006802	CADAFUBT00006930	CADAFUBT00006930	EC 6.1.1.21	Histidyl-tRNA synthetase, mitochondrial	Histidyl-tRNA synthetase, mitochondrial	Histidyl-tRNA synthetase, mitochondrial	Q4WQI3	Q4WQI3_ASPFU	XP_751539	XP_751539.1	afm:AFUA_4G12920
CADAFUBP00006809	746128.CADAFUBP00006809	https://smart.embl.de/smart/DDvec.cgi?smart=392:Pfam_Pyr_redox_3(82|312)+	Thioredoxin reductase; Belongs to the class-II pyridine nucleotide-disulfide oxidoreductase family	1.8.1.9	3509187	AFUA_4G12990	CADAFUBG00006937	CADAFUBG00006937	CADAFUBP00006809	CADAFUBP00006809	CADAFUBT00006937	CADAFUBT00006937	EC 1.8.1.9	Q4WQJ0	Q4WQJ0_ASPFU	Thioredoxin reductase	Thioredoxin reductase	Thioredoxin reductase	XP_751532	XP_751532.1	afm:AFUA_4G12990
CADAFUBP00006878	746128.CADAFUBP00006878	https://smart.embl.de/smart/DDvec.cgi?smart=737:tRNA_SAD(241|290)+Pfam_tRNA-synt_2b(388|579)+Pfam_HGTP_anticodon(633|727)+	Threonyl-tRNA synthetase, putative	3509232	6.1.1.3	AFUA_4G13700	CADAFUBG00007009	CADAFUBG00007009	CADAFUBP00006878	CADAFUBP00006878	CADAFUBT00007009	CADAFUBT00007009	EC 6.1.1.3	Q4WQR1	Q4WQR1_ASPFU	Threonyl-tRNA synthetase, putative	Threonyl-tRNA synthetase, putative	Threonyl-tRNA synthetase, putative	XP_751461	XP_751461.1	afm:AFUA_4G13700
CADAFUBP00006880	746128.CADAFUBP00006880	https://smart.embl.de/smart/DDvec.cgi?smart=424:S_TKc(23|314)+	Mitogen-activated protein kinase; MAP kinase MpkA	2.7.11.24	3509230	AFUA_4G13720	CADAFUBG00007011	CADAFUBG00007011	CADAFUBP00006880	CADAFUBP00006880	CADAFUBT00007011	CADAFUBT00007011	EC 2.7.11.24	MAP kinase MpkA	MAP kinase MpkA	Mitogen-activated protein kinase	Q4WQR3	Q4WQR3_ASPFU	XP_751459	XP_751459.1	afm:AFUA_4G13720
CADAFUBP00006933	746128.CADAFUBP00006933	https://smart.embl.de/smart/DDvec.cgi?smart=624:Pfam_HSP70(115|446)+	Hsp70 family protein	3509677	AFUA_4G14040	CADAFUBG00007065	CADAFUBG00007065	CADAFUBP00006933	CADAFUBP00006933	CADAFUBT00007065	CADAFUBT00007065	Hsp70 family protein	Hsp70 family protein	Hsp70 family protein	Q4WQU4	Q4WQU4_ASPFU	XP_751428	XP_751428.1	afm:AFUA_4G14040
CADAFUBP00006982	746128.CADAFUBP00006982	https://smart.embl.de/smart/DDvec.cgi?smart=266:Pfam_GST_N_4(26|145)+	Glutathione S-transferase, putative	3509544	AFUA_4G14380	CADAFUBG00007114	CADAFUBG00007114	CADAFUBP00006982	CADAFUBP00006982	CADAFUBT00007114	CADAFUBT00007114	Glutathione S-transferase, putative	Glutathione S-transferase, putative	Glutathione S-transferase, putative	Q4WQX8	Q4WQX8_ASPFU	XP_751394	XP_751394.1	afm:AFUA_4G14380
CADAFUBP00007035	746128.CADAFUBP00007035	https://smart.embl.de/smart/DDvec.cgi?smart=278:Pfam_Proteasome(11|145)+Pfam_Proteasome(144|225)+	Proteasome endopeptidase complex; Proteasome subunit alpha type 3, putative	3.4.25.1	3508843	AFUA_6G06350	CADAFUBG00007167	CADAFUBG00007167	CADAFUBP00007035	CADAFUBP00007035	CADAFUBT00007167	CADAFUBT00007167	EC 3.4.25.1	Proteasome endopeptidase complex	Proteasome subunit alpha type 3, putative	Proteasome subunit alpha type 3, putative	Q4WNH5	Q4WNH5_ASPFU	XP_750527	XP_750527.1	afm:AFUA_6G06350
CADAFUBP00007059	746128.CADAFUBP00007059	https://smart.embl.de/smart/DDvec.cgi?smart=245:Pfam_PMM(26|245)+	Phosphomannomutase; Involved in the synthesis of the GDP-mannose and dolichol-phosphate-mannose required for a number of critical mannosyl transfer reactions	3508808	5.4.2.8	AFUA_6G06580	CADAFUBG00007191	CADAFUBG00007191	CADAFUBP00007059	CADAFUBP00007059	CADAFUBT00007191	CADAFUBT00007191	EC 5.4.2.8	Phosphomannomutase	Phosphomannomutase (Sec53), putative	Phosphomannomutase (Sec53), putative	Q4WNF2	Q4WNF2_ASPFU	XP_750550	XP_750550.1	afm:AFUA_6G06580
CADAFUBP00007079	746128.CADAFUBP00007079	https://smart.embl.de/smart/DDvec.cgi?smart=393:COIL(8|57)+AAA(170|309)+	Proteasome regulatory particle subunit Rpt4, putative; Belongs to the AAA ATPase family	3508748	AFUA_6G06780	CADAFUBG00007211	CADAFUBG00007211	CADAFUBP00007079	CADAFUBP00007079	CADAFUBT00007211	CADAFUBT00007211	Q4WND1	Q4WND1_ASPFU	XP_750571	XP_750571.1	afm:AFUA_6G06780
CADAFUBP00007157	746128.CADAFUBP00007157	https://smart.embl.de/smart/DDvec.cgi?smart=537:Pfam_Cpn60_TCP1(38|532)+	T-complex protein 1, epsilon subunit, putative; Molecular chaperone; assists the folding of proteins upon ATP hydrolysis	3508678	AFUA_6G07540	CADAFUBG00007290	CADAFUBG00007290	CADAFUBP00007157	CADAFUBP00007157	CADAFUBT00007290	CADAFUBT00007290	Q4WN57	Q4WN57_ASPFU	T-complex protein 1, epsilon subunit, putative	T-complex protein 1, epsilon subunit, putative	T-complex protein 1, epsilon subunit, putative	XP_750645	XP_750645.1	afm:AFUA_6G07540
CADAFUBP00007165	746128.CADAFUBP00007165	https://smart.embl.de/smart/DDvec.cgi?smart=425:Pfam_NTP_transferase(4|185)+Pfam_Hexapep(222|257)+	GDP-mannose pyrophosphorylase A	2.7.7.13	3508724	AFUA_6G07620	CADAFUBG00007298	CADAFUBG00007298	CADAFUBP00007165	CADAFUBP00007165	CADAFUBT00007298	CADAFUBT00007298	EC 2.7.7.13	GDP-mannose pyrophosphorylase A	GDP-mannose pyrophosphorylase A	GDP-mannose pyrophosphorylase A	Q4WN49	Q4WN49_ASPFU	XP_750653	XP_750653.1	afm:AFUA_6G07620
CADAFUBP00007167	746128.CADAFUBP00007167	https://smart.embl.de/smart/DDvec.cgi?smart=605:Pfam_tRNA_anti-codon(125|210)+Pfam_tRNA-synt_2(226|576)+	Lysine--tRNA ligase	3508756	6.1.1.6	AFUA_6G07640	CADAFUBG00007300	CADAFUBG00007300	CADAFUBP00007167	CADAFUBP00007167	CADAFUBT00007300	CADAFUBT00007300	EC 6.1.1.6	Lysine--tRNA ligase	Lysine--tRNA ligase	Lysine--tRNA ligase	Lysyl-tRNA synthetase	Q4WN47	Q4WN47_ASPFU	XP_750655	XP_750655.1	afm:AFUA_6G07640
CADAFUBP00007179	746128.CADAFUBP00007179	https://smart.embl.de/smart/DDvec.cgi?smart=492:Pfam_RPN7(102|275)+PINT(387|470)+	Proteasome regulatory particle subunit (RpnG), putative	3508797	AFUA_6G07760	CADAFUBG00007312	CADAFUBG00007312	CADAFUBP00007179	CADAFUBP00007179	CADAFUBT00007312	CADAFUBT00007312	Q4WN35	Q4WN35_ASPFU	XP_750667	XP_750667.1	afm:AFUA_6G07760
CADAFUBP00007200	746128.CADAFUBP00007200	https://smart.embl.de/smart/DDvec.cgi?smart=318:Pfam_Glyoxalase_4(11|137)+Pfam_Glyoxalase(165|306)+	Lactoylglutathione lyase; Catalyzes the conversion of hemimercaptal, formed from methylglyoxal and glutathione, to S-lactoylglutathione	3508793	4.4.1.5	AFUA_6G07940	CADAFUBG00007333	CADAFUBG00007333	CADAFUBP00007200	CADAFUBP00007200	CADAFUBT00007333	CADAFUBT00007333	EC 4.4.1.5	Glyoxalase I	Lactoylglutathione lyase	Lactoylglutathione lyase	Lactoylglutathione lyase	Q4WN17	Q4WN17_ASPFU	XP_750685	XP_750685.1	afm:AFUA_6G07940
CADAFUBP00007233	746128.CADAFUBP00007233	https://smart.embl.de/smart/DDvec.cgi?smart=1235:Pfam_RNA_pol_Rpb2_2(211|411)+Pfam_RNA_pol_Rpb2_3(498|563)+Pfam_RNA_pol_Rpa2_4(603|660)+Pfam_RNA_pol_Rpb2_6(709|1089)+Pfam_RNA_pol_Rpb2_7(1091|1159)+	DNA-directed RNA polymerase subunit beta; DNA-dependent RNA polymerase catalyzes the transcription of DNA into RNA using the four ribonucleoside triphosphates as substrates	2.7.7.6	3508827	AFUA_6G08300	CADAFUBG00007366	CADAFUBG00007366	CADAFUBP00007233	CADAFUBP00007233	CADAFUBT00007366	CADAFUBT00007366	DNA-directed RNA polymerase	DNA-directed RNA polymerase	DNA-directed RNA polymerase subunit beta	EC 2.7.7.6	Q4WMY3	Q4WMY3_ASPFU	XP_750719	XP_750719.1	afm:AFUA_6G08300
thiA	746128.CADAFUBP00007239	https://smart.embl.de/smart/DDvec.cgi?smart=332:Pfam_DAO(78|139)+	Thiamine thiazole synthase; Involved in biosynthesis of the thiamine precursor thiazole. Catalyzes the conversion of NAD and glycine to adenosine diphosphate 5-(2-hydroxyethyl)-4-methylthiazole-2-carboxylic acid (ADT), an adenylated thiazole intermediate. The reaction includes an iron-dependent sulfide transfer from a conserved cysteine residue of the protein to a thiazole intermediate. The enzym…	3508853	AFUA_6G08360	CADAFUBG00007372	CADAFUBG00007372	CADAFUBP00007239	CADAFUBP00007239	CADAFUBT00007372	CADAFUBT00007372	Q4WMX7	THI4_ASPFU	Thiamine thiazole synthase	Thiamine thiazole synthase	Thiamine thiazole synthase	Thiazole biosynthetic enzyme	XP_750725	XP_750725.1	afm:AFUA_6G08360	thiA
CADAFUBP00007269	746128.CADAFUBP00007269	https://smart.embl.de/smart/DDvec.cgi?smart=1178:COIL(258|871)+COIL(938|1108)+	M protein repeat protein	3508042	AFUA_6G08660	CADAFUBG00007402	CADAFUBG00007402	CADAFUBP00007269	CADAFUBP00007269	CADAFUBT00007402	CADAFUBT00007402	M protein repeat protein	Putative uncharacterized protein	Putative uncharacterized protein	Q4WMU7	Q4WMU7_ASPFU	XP_750755	XP_750755.1	afm:AFUA_6G08660
CADAFUBP00007275	746128.CADAFUBP00007275	https://smart.embl.de/smart/DDvec.cgi?smart=342:Pfam_PNP_UDP_1(44|294)+	S-methyl-5'-thioadenosine phosphorylase; Catalyzes the reversible phosphorylation of S-methyl-5'- thioadenosine (MTA) to adenine and 5-methylthioribose-1-phosphate. Involved in the breakdown of MTA, a major by-product of polyamine biosynthesis. Responsible for the first step in the methionine salvage pathway after MTA has been generated from S- adenosylmethionine. Has broad substrate specificity …	2.4.2.28	3508048	5'-methylthioadenosine phosphorylase	AFUA_6G08720	CADAFUBG00007408	CADAFUBG00007408	CADAFUBP00007275	CADAFUBP00007275	CADAFUBT00007408	CADAFUBT00007408	EC 2.4.2.28	MTAP_ASPFU	Q4WMU1	S-methyl-5'-thioadenosine phosphorylase	S-methyl-5'-thioadenosine phosphorylase	S-methyl-5'-thioadenosine phosphorylase	XP_750761	XP_750761.1	afm:AFUA_6G08720
CADAFUBP00007278	746128.CADAFUBP00007278	https://smart.embl.de/smart/DDvec.cgi?smart=578:Pfam_Aldedh(83|562)+	Delta-1-pyrroline-5-carboxylate dehydrogenase PrnC; Belongs to the aldehyde dehydrogenase family	1.2.1.88	3508051	AFUA_6G08750	CADAFUBG00007411	CADAFUBG00007411	CADAFUBP00007278	CADAFUBP00007278	CADAFUBT00007411	CADAFUBT00007411	EC 1.2.1.88	Q4WMT8	Q4WMT8_ASPFU	XP_750764	XP_750764.1	afm:AFUA_6G08750
CADAFUBP00007309	746128.CADAFUBP00007309	https://smart.embl.de/smart/DDvec.cgi?smart=415:TRANS(20|39)+Pfam_Inositol_P(64|414)+	3'(2'),5'-bisphosphate nucleotidase	3'(2'),5'-bisphosphate nucleotidase	3'(2'),5'-bisphosphate nucleotidase	3'(2'),5'-bisphosphate nucleotidase	3.1.3.7	3508086	AFUA_6G09070	CADAFUBG00007442	CADAFUBG00007442	CADAFUBP00007309	CADAFUBP00007309	CADAFUBT00007442	CADAFUBT00007442	EC 3.1.3.7	Q4WMQ7	Q4WMQ7_ASPFU	XP_750795	XP_750795.1	afm:AFUA_6G09070
CADAFUBP00007408	746128.CADAFUBP00007408	https://smart.embl.de/smart/DDvec.cgi?smart=1095:IBN_N(24|91)+Pfam_HEAT(386|416)+	Importin beta-4 subunit, putative	3508193	AFUA_6G09990	CADAFUBG00007544	CADAFUBG00007544	CADAFUBP00007408	CADAFUBP00007408	CADAFUBT00007544	CADAFUBT00007544	Importin beta-4 subunit, putative	Importin beta-4 subunit, putative	Importin beta-4 subunit, putative	Q4WMG4	Q4WMG4_ASPFU	XP_750888	XP_750888.1	afm:AFUA_6G09990
cap1	746128.CADAFUBP00007417	https://smart.embl.de/smart/DDvec.cgi?smart=276:Pfam_F-actin_cap_A(8|271)+	F-actin-capping protein subunit alpha; F-actin-capping proteins bind in a Ca(2+)-independent manner to the fast growing ends of actin filaments (barbed end) thereby blocking the exchange of subunits at these ends. Unlike other capping proteins (such as gelsolin and severin), these proteins do not sever actin filaments (By similarity)	3508200	AFUA_6G10060	CADAFUBG00007553	CADAFUBG00007553	CADAFUBP00007417	CADAFUBP00007417	CADAFUBT00007553	CADAFUBT00007553	CAPZA_ASPFU	F-actin capping protein alpha subunit, putative	F-actin capping protein alpha subunit, putative	F-actin-capping protein subunit alpha	Q4WMF7	XP_750895	XP_750895.1	afm:AFUA_6G10060	cap1
CADAFUBP00007456	746128.CADAFUBP00007456	https://smart.embl.de/smart/DDvec.cgi?smart=475:Zpr1(40|197)+Zpr1(256|422)+	Zinc finger protein ZPR1	3508240	AFUA_6G10470	CADAFUBG00007592	CADAFUBG00007592	CADAFUBP00007456	CADAFUBP00007456	CADAFUBT00007592	CADAFUBT00007592	Q4WMB7	Q4WMB7_ASPFU	XP_750935	XP_750935.1	Zinc finger protein ZPR1	Zinc finger protein ZPR1	Zinc finger protein ZPR1	afm:AFUA_6G10470
CADAFUBP00007667	746128.CADAFUBP00007667	https://smart.embl.de/smart/DDvec.cgi?smart=171:Pfam_S10_plectin(19|111)+	40S ribosomal protein S10b	3508451	40S ribosomal protein S10b	40S ribosomal protein S10b	40S ribosomal protein S10b	AFUA_6G12660	CADAFUBG00007804	CADAFUBG00007804	CADAFUBP00007667	CADAFUBP00007667	CADAFUBT00007804	CADAFUBT00007804	Q4WLQ8	Q4WLQ8_ASPFU	XP_751144	XP_751144.1	afm:AFUA_6G12660
CADAFUBP00007669	746128.CADAFUBP00007669	https://smart.embl.de/smart/DDvec.cgi?smart=130:Pfam_HIT(13|96)+	HIT domain protein	3508453	AFUA_6G12680	CADAFUBG00007806	CADAFUBG00007806	CADAFUBP00007669	CADAFUBP00007669	CADAFUBT00007806	CADAFUBT00007806	HIT domain protein	HIT domain protein	HIT domain protein	Q4WLQ6	Q4WLQ6_ASPFU	XP_751146	XP_751146.1	afm:AFUA_6G12680
CADAFUBP00007678	746128.CADAFUBP00007678	https://smart.embl.de/smart/DDvec.cgi?smart=405:PINT(291|384)+	Proteasome regulatory particle subunit (RpnI), putative	3508462	AFUA_6G12770	CADAFUBG00007815	CADAFUBG00007815	CADAFUBP00007678	CADAFUBP00007678	CADAFUBT00007815	CADAFUBT00007815	Q4WLP7	Q4WLP7_ASPFU	XP_751155	XP_751155.1	afm:AFUA_6G12770
CADAFUBP00007682	746128.CADAFUBP00007682	https://smart.embl.de/smart/DDvec.cgi?smart=353:S_TKc(21|309)+	Mitogen-activated protein kinase; MAP kinase MpkB/Fus3	2.7.11.24	3508467	AFUA_6G12820	CADAFUBG00007819	CADAFUBG00007819	CADAFUBP00007682	CADAFUBP00007682	CADAFUBT00007819	CADAFUBT00007819	EC 2.7.11.24	MAP kinase MpkB/Fus3	MAP kinase MpkB/Fus3	Mitogen-activated protein kinase	Q4WLP2	Q4WLP2_ASPFU	XP_751160	XP_751160.1	afm:AFUA_6G12820
CADAFUBP00007981	746128.CADAFUBP00007981	https://smart.embl.de/smart/DDvec.cgi?smart=525:Pfam_AcetylCoA_hydro(12|230)+Pfam_AcetylCoA_hyd_C(333|484)+	Acetyl-coA hydrolase Ach1, putative	3.1.2.1	3504669	AFUA_8G05580	Acetyl-coA hydrolase Ach1, putative	Acetyl-coA hydrolase Ach1, putative	Acetyl-coA hydrolase Ach1, putative	CADAFUBG00008126	CADAFUBG00008126	CADAFUBP00007981	CADAFUBP00007981	CADAFUBT00008126	CADAFUBT00008126	EC 3.1.2.1	Q4WC63	Q4WC63_ASPFU	XP_747359	XP_747359.1	afm:AFUA_8G05580
CADAFUBP00007994	746128.CADAFUBP00007994	https://smart.embl.de/smart/DDvec.cgi?smart=241:Pfam_Mt_ATP-synt_B(71|233)+	Mitochondrial ATPase subunit ATP4, putative	3504673	AFUA_8G05440	CADAFUBG00008139	CADAFUBG00008139	CADAFUBP00007994	CADAFUBP00007994	CADAFUBT00008139	CADAFUBT00008139	Mitochondrial ATPase subunit ATP4, putative	Mitochondrial ATPase subunit ATP4, putative	Mitochondrial ATPase subunit ATP4, putative	Q4WC76	Q4WC76_ASPFU	XP_747346	XP_747346.1	afm:AFUA_8G05440
CADAFUBP00008053	746128.CADAFUBP00008053	https://smart.embl.de/smart/DDvec.cgi?smart=336:S_TKc(32|317)+	Casein kinase, putative; Belongs to the protein kinase superfamily	2.7.11.1	3504756	AFUA_8G04810	CADAFUBG00008199	CADAFUBG00008199	CADAFUBP00008053	CADAFUBP00008053	CADAFUBT00008199	CADAFUBT00008199	Casein kinase, putative	Casein kinase, putative	Casein kinase, putative	EC 2.7.11.1	Q4WCD5	Q4WCD5_ASPFU	XP_747287	XP_747287.1	afm:AFUA_8G04810
CADAFUBP00008054	746128.CADAFUBP00008054	https://smart.embl.de/smart/DDvec.cgi?smart=1057:COIL(46|77)+Pfam_tRNA-synt_1g(134|294)+Pfam_Anticodon_1(774|927)+COIL(982|1057)+	Valyl-tRNA synthetase; Belongs to the class-I aminoacyl-tRNA synthetase family	3504755	6.1.1.9	AFUA_8G04800	CADAFUBG00008200	CADAFUBG00008200	CADAFUBP00008054	CADAFUBP00008054	CADAFUBT00008200	CADAFUBT00008200	EC 6.1.1.9	Q4WCD6	Q4WCD6_ASPFU	Valyl-tRNA synthetase	Valyl-tRNA synthetase	Valyl-tRNA synthetase	XP_747286	XP_747286.1	afm:AFUA_8G04800
CADAFUBP00008061	746128.CADAFUBP00008061	https://smart.embl.de/smart/DDvec.cgi?smart=728:Pfam_Peptidase_S9(490|700)+	Oligopeptidase family protein	3504716	AFUA_8G04730	CADAFUBG00008207	CADAFUBG00008207	CADAFUBP00008061	CADAFUBP00008061	CADAFUBT00008207	CADAFUBT00008207	Oligopeptidase family protein	Oligopeptidase family protein	Oligopeptidase family protein	Q4WCE3	Q4WCE3_ASPFU	XP_747279	XP_747279.2	afm:AFUA_8G04730
CADAFUBP00008075	746128.CADAFUBP00008075	https://smart.embl.de/smart/DDvec.cgi?smart=607:Pfam_PWWP(140|296)+	PWWP domain protein	3504636	AFUA_8G04570	CADAFUBG00008221	CADAFUBG00008221	CADAFUBP00008075	CADAFUBP00008075	CADAFUBT00008221	CADAFUBT00008221	PWWP domain protein	PWWP domain protein	PWWP domain protein	Q4WCF8	Q4WCF8_ASPFU	XP_747264	XP_747264.1	afm:AFUA_8G04570
ALA1	746128.CADAFUBP00008147	https://smart.embl.de/smart/DDvec.cgi?smart=1011:Pfam_tRNA-synt_2c(65|646)+tRNA_SAD(744|803)+Pfam_DHHA1(858|1006)+	Alanine--tRNA ligase; Catalyzes the attachment of alanine to tRNA(Ala) in a two-step reaction: alanine is first activated by ATP to form Ala- AMP and then transferred to the acceptor end of tRNA(Ala). Also edits incorrectly charged tRNA(Ala) via its editing domain; Belongs to the class-II aminoacyl-tRNA synthetase family	3504947	6.1.1.7	AFUA_8G03880	ALA1	Alanine--tRNA ligase	Alanyl-tRNA synthetase	Alanyl-tRNA synthetase, putative	Alanyl-tRNA synthetase, putative	CADAFUBG00008299	CADAFUBG00008299	CADAFUBP00008147	CADAFUBP00008147	CADAFUBT00008299	CADAFUBT00008299	EC 6.1.1.7	Q4WCM7	Q4WCM7_ASPFU	XP_747195	XP_747195.1	afm:AFUA_8G03880
CADAFUBP00008152	746128.CADAFUBP00008152	https://smart.embl.de/smart/DDvec.cgi?smart=800:DYNc(5|269)+GED(708|799)+	Dynamin-like GTPase Dnm1, putative; Belongs to the TRAFAC class dynamin-like GTPase superfamily. Dynamin/Fzo/YdjA family	3.6.5.5	3504425	AFUA_8G02840	CADAFUBG00008304	CADAFUBG00008304	CADAFUBP00008152	CADAFUBP00008152	CADAFUBT00008304	CADAFUBT00008304	Dynamin-like GTPase Dnm1, putative	Dynamin-like GTPase Dnm1, putative	Dynamin-like GTPase Dnm1, putative	EC 3.6.5.5	Q4WBM7	Q4WBM7_ASPFU	XP_746923	XP_746923.1	afm:AFUA_8G02840
CADAFUBP00008439	746128.CADAFUBP00008439	https://smart.embl.de/smart/DDvec.cgi?smart=448:Tubulin(47|244)+Tubulin_C(246|383)+	Tubulin beta chain; Tubulin is the major constituent of microtubules. It binds two moles of GTP, one at an exchangeable site on the beta chain and one at a non-exchangeable site on the alpha chain	3504259	AFUA_7G00250	Beta-tubulin	CADAFUBG00008593	CADAFUBG00008593	CADAFUBP00008439	CADAFUBP00008439	CADAFUBT00008593	CADAFUBT00008593	Q4WA70	TBB_ASPFU	Tubulin beta chain	Tubulin beta subunit	Tubulin beta subunit	XP_746904	XP_746904.1	afm:AFUA_7G00250
CADAFUBP00008582	746128.CADAFUBP00008582	http://smart.embl.de/smart/DDt.cgi?smart=486:	Uncharacterized protein	3504223	AFUA_7G01700	CADAFUBG00008742	CADAFUBG00008742	CADAFUBP00008582	CADAFUBP00008582	CADAFUBT00008742	CADAFUBT00008742	Putative uncharacterized protein	Putative uncharacterized protein	Q4WAL2	Q4WAL2_ASPFU	Uncharacterized protein	XP_746762	XP_746762.2	afm:AFUA_7G01700
CADAFUBP00008597	746128.CADAFUBP00008597	https://smart.embl.de/smart/DDvec.cgi?smart=585:TPR(40|73)+TPR(74|107)+STI1(142|183)+TPR(263|296)+TPR(297|329)+TPR(337|370)+TPR(431|464)+TPR(465|498)+STI1(533|572)+	Heat shock protein (Sti1), putative	3504281	AFUA_7G01860	CADAFUBG00008757	CADAFUBG00008757	CADAFUBP00008597	CADAFUBP00008597	CADAFUBT00008757	CADAFUBT00008757	Heat shock protein (Sti1), putative	Heat shock protein (Sti1), putative	Heat shock protein (Sti1), putative	Q4WAM8	Q4WAM8_ASPFU	XP_746746	XP_746746.1	afm:AFUA_7G01860
CADAFUBP00008613	746128.CADAFUBP00008613	https://smart.embl.de/smart/DDvec.cgi?smart=238:Pfam_V-ATPase_G(126|190)+	Uncharacterized protein	3504154	AFUA_7G02020	CADAFUBG00008773	CADAFUBG00008773	CADAFUBP00008613	CADAFUBP00008613	CADAFUBT00008773	CADAFUBT00008773	Putative uncharacterized protein	Putative uncharacterized protein	Q4WAP5	Q4WAP5_ASPFU	Uncharacterized protein	XP_746729	XP_746729.2	afm:AFUA_7G02020
CADAFUBP00008627	746128.CADAFUBP00008627	https://smart.embl.de/smart/DDvec.cgi?smart=509:Pfam_UDPGP(78|490)+	UDP-N-acetylglucosamine pyrophosphorylase	2.7.7.23	2.7.7.83	3504292	4BMA	AFUA_7G02180	CADAFUBG00008787	CADAFUBG00008787	CADAFUBP00008627	CADAFUBP00008627	CADAFUBT00008787	CADAFUBT00008787	EC 2.7.7.23	EC 2.7.7.83	Q4WAR0	Q4WAR0_ASPFU	UDP-N-acetylglucosamine pyrophosphorylase	UDP-N-acetylglucosamine pyrophosphorylase	UDP-N-acetylglucosamine pyrophosphorylase	XP_746714	XP_746714.1	afm:AFUA_7G02180
CADAFUBP00008641	746128.CADAFUBP00008641	https://smart.embl.de/smart/DDvec.cgi?smart=217:Pfam_Pribosyltran(64|210)+	Adenine phosphoribosyltransferase 1	2.4.2.7	3504235	AFUA_7G02310	Adenine phosphoribosyltransferase 1	Adenine phosphoribosyltransferase 1	Adenine phosphoribosyltransferase 1	CADAFUBG00008801	CADAFUBG00008801	CADAFUBP00008641	CADAFUBP00008641	CADAFUBT00008801	CADAFUBT00008801	EC 2.4.2.7	Q4WAS3	Q4WAS3_ASPFU	XP_746701	XP_746701.1	afm:AFUA_7G02310
CADAFUBP00008701	746128.CADAFUBP00008701	https://smart.embl.de/smart/DDvec.cgi?smart=468:PINT(304|395)+	Eukaryotic translation initiation factor 3 subunit M; Component of the eukaryotic translation initiation factor 3 (eIF-3) complex, which is involved in protein synthesis of a specialized repertoire of mRNAs and, together with other initiation factors, stimulates binding of mRNA and methionyl-tRNAi to the 40S ribosome. The eIF-3 complex specifically targets and initiates translation of a subset of…	3506428	AFUA_7G03980	CADAFUBG00008865	CADAFUBG00008865	CADAFUBP00008701	CADAFUBP00008701	CADAFUBT00008865	CADAFUBT00008865	EIF3M_ASPFU	Q4WG69	XP_749110	XP_749110.1	afm:AFUA_7G03980
CADAFUBP00008702	746128.CADAFUBP00008702	https://smart.embl.de/smart/DDvec.cgi?smart=235:Pfam_AAA_18(36|186)+	Uridylate kinase; Catalyzes the phosphorylation of pyrimidine nucleoside monophosphates at the expense of ATP. Plays an important role in de novo pyrimidine nucleotide biosynthesis. Has preference for UMP and dUMP as phosphate acceptors, but can also use CMP, dCMP and AMP; Belongs to the adenylate kinase family. UMP-CMP kinase subfamily	2.7.4.14	3506427	AFUA_7G03990	ATP:UMP phosphotransferase	CADAFUBG00008866	CADAFUBG00008866	CADAFUBP00008702	CADAFUBP00008702	CADAFUBT00008866	CADAFUBT00008866	Deoxycytidylate kinase	EC 2.7.4.14	Q4WG70	Q4WG70_ASPFU	Uridine monophosphate kinase	Uridylate kinase	Uridylate kinase Ura6	Uridylate kinase Ura6	XP_749109	XP_749109.1	afm:AFUA_7G03990
CADAFUBP00008710	746128.CADAFUBP00008710	https://smart.embl.de/smart/DDvec.cgi?smart=369:Pfam_DAHP_synth_1(36|347)+	Phospho-2-dehydro-3-deoxyheptonate aldolase; Stereospecific condensation of phosphoenolpyruvate (PEP) and D-erythrose-4-phosphate (E4P) giving rise to 3-deoxy-D- arabino-heptulosonate-7-phosphate (DAHP)	2.5.1.54	3506523	AFUA_7G04070	CADAFUBG00008874	CADAFUBG00008874	CADAFUBP00008710	CADAFUBP00008710	CADAFUBT00008874	CADAFUBT00008874	DAHP synthase	EC 2.5.1.54	Phospho-2-dehydro-3-deoxyheptonate aldolase	Phospho-2-dehydro-3-deoxyheptonate aldolase	Phospho-2-dehydro-3-deoxyheptonate aldolase	Phospho-2-keto-3-deoxyheptonate aldolase	Q4WG78	Q4WG78_ASPFU	XP_749101	XP_749101.1	afm:AFUA_7G04070
CADAFUBP00008723	746128.CADAFUBP00008723	https://smart.embl.de/smart/DDvec.cgi?smart=519:TRANS(54|71)+TRANS(78|100)+Pfam_Methyltransf_23(232|394)+	Cyclopropane-fatty-acyl-phospholipid synthase, putative	2.1.1.317	3506536	AFUA_7G04190	CADAFUBG00008887	CADAFUBG00008887	CADAFUBP00008723	CADAFUBP00008723	CADAFUBT00008887	CADAFUBT00008887	EC 2.1.1.317	Q4WG90	Q4WG90_ASPFU	XP_749089	XP_749089.1	afm:AFUA_7G04190
CADAFUBP00008812	746128.CADAFUBP00008812	https://smart.embl.de/smart/DDvec.cgi?smart=483:Pfam_DAO(6|243)+	FAD dependent oxidoreductase, putative	3506328	AFUA_7G05070	CADAFUBG00008978	CADAFUBG00008978	CADAFUBP00008812	CADAFUBP00008812	CADAFUBT00008978	CADAFUBT00008978	FAD dependent oxidoreductase, putative	FAD dependent oxidoreductase, putative	FAD dependent oxidoreductase, putative	Q4WGH6	Q4WGH6_ASPFU	XP_749003	XP_749003.1	afm:AFUA_7G05070
CADAFUBP00008842	746128.CADAFUBP00008842	https://smart.embl.de/smart/DDvec.cgi?smart=526:Pfam_MMR_HSR1(155|300)+COIL(440|517)+	Septin AspB; Belongs to the TRAFAC class TrmE-Era-EngA-EngB-Septin- like GTPase superfamily. Septin GTPase family	3506356	AFUA_7G05370	CADAFUBG00009008	CADAFUBG00009008	CADAFUBP00008842	CADAFUBP00008842	CADAFUBT00009008	CADAFUBT00009008	Q4WGK7	Q4WGK7_ASPFU	Septin AspB	Septin AspB	Septin AspB	XP_748972	XP_748972.1	afm:AFUA_7G05370
sun1	746128.CADAFUBP00008850	https://smart.embl.de/smart/DDvec.cgi?smart=414:SIGNAL(1|19)+Pfam_SUN(148|402)+	Secreted beta-glucosidase sun1; Cell surface beta-glucosidase involved in cell wall biosynthesis and septation, and thus required for normal growth and correct hyphal morphogenesis. Has hydrolytic activity on linear (1->3)-beta-D-glucans such as laminaribiose and other laminarioligosaccharides. Has also a minor transferase activity; Belongs to the SUN family	3.2.1.-	3506240	AFUA_7G05450	CADAFUBG00009016	CADAFUBG00009016	CADAFUBP00008850	CADAFUBP00008850	CADAFUBT00009016	CADAFUBT00009016	EC 3.2.1.-	Q4WGL5	SUN domain protein (Uth1), putative	SUN domain protein (Uth1), putative	SUN1_ASPFU	Secreted beta-glucosidase sun1	XP_748964	XP_748964.1	afm:AFUA_7G05450	sun1
CADAFUBP00008852	746128.CADAFUBP00008852	https://smart.embl.de/smart/DDvec.cgi?smart=360:ETF(38|228)+Pfam_ETF_alpha(235|319)+	Electron transfer flavoprotein alpha subunit, putative	3506254	AFUA_7G05470	CADAFUBG00009018	CADAFUBG00009018	CADAFUBP00008852	CADAFUBP00008852	CADAFUBT00009018	CADAFUBT00009018	Q4WGL7	Q4WGL7_ASPFU	XP_748962	XP_748962.1	afm:AFUA_7G05470
CADAFUBP00008898	746128.CADAFUBP00008898	https://smart.embl.de/smart/DDvec.cgi?smart=716:Pfam_Peptidase_M3(220|715)+	Metallopeptidase MepB	3.4.24.-	3506419	AFUA_7G05930	CADAFUBG00009064	CADAFUBG00009064	CADAFUBP00008898	CADAFUBP00008898	CADAFUBT00009064	CADAFUBT00009064	EC 3.4.24.-	Metallopeptidase MepB	Metallopeptidase MepB	Metallopeptidase MepB	Q4WGR2	Q4WGR2_ASPFU	XP_748917	XP_748917.1	afm:AFUA_7G05930
CADAFUBP00009069	746128.CADAFUBP00009069	https://smart.embl.de/smart/DDvec.cgi?smart=428:Pfam_Aminotran_5(7|112)+Pfam_Aminotran_5(105|416)+	Phosphoserine aminotransferase	2.6.1.52	3505001	AFUA_6G04970	CADAFUBG00009235	CADAFUBG00009235	CADAFUBP00009069	CADAFUBP00009069	CADAFUBT00009235	CADAFUBT00009235	EC 2.6.1.52	Phosphoserine aminotransferase	Phosphoserine aminotransferase	Phosphoserine aminotransferase	Q4WDJ5	Q4WDJ5_ASPFU	XP_747581	XP_747581.1	afm:AFUA_6G04970
CADAFUBP00009164	746128.CADAFUBP00009164	https://smart.embl.de/smart/DDvec.cgi?smart=983:IBN_N(24|97)+Pfam_Cse1(151|521)+Pfam_CAS_CSE1(522|981)+	Chromosome segregation protein Cse1, putative	3505344	AFUA_6G04010	CADAFUBG00009330	CADAFUBG00009330	CADAFUBP00009164	CADAFUBP00009164	CADAFUBT00009330	CADAFUBT00009330	Chromosome segregation protein Cse1, putative	Chromosome segregation protein Cse1, putative	Chromosome segregation protein Cse1, putative	Q4WDA0	Q4WDA0_ASPFU	XP_747676	XP_747676.1	afm:AFUA_6G04010
CADAFUBP00009184	746128.CADAFUBP00009184	https://smart.embl.de/smart/DDvec.cgi?smart=255:Pfam_Mt_ATP-synt_D(12|161)+	ATP synthase D chain, mitochondrial, putative	3505086	AFUA_6G03810	ATP synthase D chain, mitochondrial, putative	ATP synthase D chain, mitochondrial, putative	ATP synthase D chain, mitochondrial, putative	CADAFUBG00009352	CADAFUBG00009352	CADAFUBP00009184	CADAFUBP00009184	CADAFUBT00009352	CADAFUBT00009352	Q4WD80	Q4WD80_ASPFU	XP_747696	XP_747696.1	afm:AFUA_6G03810
CADAFUBP00009192	746128.CADAFUBP00009192	https://smart.embl.de/smart/DDvec.cgi?smart=558:Pfam_MmgE_PrpD(76|534)+	2-methylcitrate dehydratase, putative	2-methylcitrate dehydratase, putative	2-methylcitrate dehydratase, putative	2-methylcitrate dehydratase, putative	3505070	4.2.1.79	AFUA_6G03730	CADAFUBG00009360	CADAFUBG00009360	CADAFUBP00009192	CADAFUBP00009192	CADAFUBT00009360	CADAFUBT00009360	EC 4.2.1.79	Q4WD72	Q4WD72_ASPFU	XP_747704	XP_747704.1	afm:AFUA_6G03730
CADAFUBP00009204	746128.CADAFUBP00009204	https://smart.embl.de/smart/DDvec.cgi?smart=465:Pfam_Citrate_synt(72|456)+	Citrate synthase; Belongs to the citrate synthase family	2.3.3.1	3505003	AFUA_6G03590	CADAFUBG00009373	CADAFUBG00009373	CADAFUBP00009204	CADAFUBP00009204	CADAFUBT00009373	CADAFUBT00009373	Citrate synthase	Citrate synthase	Citrate synthase	E9QUP9	E9QUP9_ASPFU	EC 2.3.3.1	XP_747718	XP_747718.1	afm:AFUA_6G03590
CADAFUBP00009209	746128.CADAFUBP00009209	https://smart.embl.de/smart/DDvec.cgi?smart=539:Pfam_Malate_synthase(11|531)+	Malate synthase; Belongs to the malate synthase family	2.3.3.9	3505008	AFUA_6G03540	CADAFUBG00009378	CADAFUBG00009378	CADAFUBP00009209	CADAFUBP00009209	CADAFUBT00009378	CADAFUBT00009378	EC 2.3.3.9	Malate synthase	Malate synthase	Malate synthase	Q4WD53	Q4WD53_ASPFU	XP_747723	XP_747723.1	afm:AFUA_6G03540
fmpC	746128.CADAFUBP00009217	https://smart.embl.de/smart/DDvec.cgi?smart=663:Pfam_ATP-grasp_4(353|500)+	Fumipyrrole biosynthesis protein C; Part of the gene cluster that mediates the biosynthesis of fumipyrrole, a brown pigment that is involved in growth and conidiation	3505178	AFUA_6G03460	CADAFUBG00009386	CADAFUBG00009386	CADAFUBP00009217	CADAFUBP00009217	CADAFUBT00009386	CADAFUBT00009386	FMPC_ASPFU	Fumipyrrole biosynthesis protein C	Putative uncharacterized protein	Putative uncharacterized protein	Q4WD45	XP_747731	XP_747731.1	afm:AFUA_6G03460	fmpC
fmpA	746128.CADAFUBP00009219	https://smart.embl.de/smart/DDvec.cgi?smart=497:Pfam_DAO(6|460)+	Amino acid oxidase fmpA; Amino acid oxidase; part of the gene cluster that mediates the biosynthesis of fumipyrrole, a brown pigment that is involved in growth and conidiation	3505180	AFUA_6G03440	Amino acid oxidase fmpA	CADAFUBG00009388	CADAFUBG00009388	CADAFUBP00009219	CADAFUBP00009219	CADAFUBT00009388	CADAFUBT00009388	FMPA_ASPFU	Fructosyl amino acid oxidase, putative	Fructosyl amino acid oxidase, putative	Fumipyrrole biosynthesis protein A	Q4WD43	XP_747733	XP_747733.1	afm:AFUA_6G03440	fmpA
CADAFUBP00009270	746128.CADAFUBP00009270	https://smart.embl.de/smart/DDvec.cgi?smart=906:Pfam_AA_kinase(98|327)+Pfam_NAT(333|505)+Semialdhyde_dh(592|716)+	Acetylglutamate kinase, putative; In the N-terminal section; belongs to the acetylglutamate kinase family	1.2.1.38	2.7.2.8	3505140	AFUA_6G02910	Acetylglutamate kinase, putative	Acetylglutamate kinase, putative	Acetylglutamate kinase, putative	CADAFUBG00009441	CADAFUBG00009441	CADAFUBP00009270	CADAFUBP00009270	CADAFUBT00009441	CADAFUBT00009441	EC 1.2.1.38	EC 2.7.2.8	Q4WCZ1	Q4WCZ1_ASPFU	XP_747785	XP_747785.1	afm:AFUA_6G02910
CADAFUBP00009277	746128.CADAFUBP00009277	https://smart.embl.de/smart/DDvec.cgi?smart=128:Pfam_DUF1687(15|128)+	Uncharacterized protein	3505335	AFUA_6G02830	CADAFUBG00009449	CADAFUBG00009449	CADAFUBP00009277	CADAFUBP00009277	CADAFUBT00009449	CADAFUBT00009449	Putative uncharacterized protein	Putative uncharacterized protein	Q4WCY2	Q4WCY2_ASPFU	Uncharacterized protein	XP_747794	XP_747794.1	afm:AFUA_6G02830
sub2	746128.CADAFUBP00009298	https://smart.embl.de/smart/DDvec.cgi?smart=448:DEXDc(77|287)+HELICc(323|404)+	ATP-dependent RNA helicase sub2; ATP-binding RNA helicase involved in transcription elongation and required for the export of mRNA out of the nucleus. SUB2 plays also a role in pre-mRNA splicing and spliceosome assembly. May be involved in rDNA and telomeric silencing, and maintenance of genome integrity (By similarity); Belongs to the DEAD box helicase family. DECD subfamily	3.6.4.13	3505095	AFUA_6G02630	ATP dependent RNA helicase (Sub2), putative	ATP dependent RNA helicase (Sub2), putative	ATP-dependent RNA helicase sub2	CADAFUBG00009470	CADAFUBG00009470	CADAFUBP00009298	CADAFUBP00009298	CADAFUBT00009470	CADAFUBT00009470	EC 3.6.4.13	Q4WCW2	SUB2_ASPFU	XP_747814	XP_747814.1	afm:AFUA_6G02630	sub2
CADAFUBP00009308	746128.CADAFUBP00009308	https://smart.embl.de/smart/DDvec.cgi?smart=598:WH1(18|126)+WH2(512|531)+	annotation not available	3505101	AFUA_6G02540	Actin associated protein Wsp1, putative	CADAFUBG00009481	CADAFUBG00009481	CADAFUBP00009308	CADAFUBP00009308	CADAFUBT00009481	CADAFUBT00009481	Q4WCV2	Q4WCV2_ASPFU	XP_747824	XP_747824.1	afm:AFUA_6G02540
CADAFUBP00009338	746128.CADAFUBP00009338	https://smart.embl.de/smart/DDvec.cgi?smart=493:Pfam_Hexokinase_1(8|216)+Pfam_Hexokinase_2(225|482)+	Phosphotransferase; Glucokinase GlkA, putative; Belongs to the hexokinase family	2.7.1.1	3505282	AFUA_6G02230	CADAFUBG00009511	CADAFUBG00009511	CADAFUBP00009338	CADAFUBP00009338	CADAFUBT00009511	CADAFUBT00009511	EC 2.7.1.1	Glucokinase GlkA, putative	Glucokinase GlkA, putative	Phosphotransferase	Q4WCS2	Q4WCS2_ASPFU	XP_747854	XP_747854.1	afm:AFUA_6G02230
CADAFUBP00009582	746128.CADAFUBP00009582	https://smart.embl.de/smart/DDvec.cgi?smart=338:Pfam_3HCDH_N(61|240)+Pfam_3HCDH(242|338)+	3-hydroxybutyryl-CoA dehydrogenase, putative	1.1.1.157	3-hydroxybutyryl-CoA dehydrogenase, putative	3-hydroxybutyryl-CoA dehydrogenase, putative	3-hydroxybutyryl-CoA dehydrogenase, putative	3503985	AFUA_4G04410	CADAFUBG00009757	CADAFUBG00009757	CADAFUBP00009582	CADAFUBP00009582	CADAFUBT00009757	CADAFUBT00009757	EC 1.1.1.157	Q4W9M5	Q4W9M5_ASPFU	XP_746626	XP_746626.1	afm:AFUA_4G04410
CADAFUBP00009591	746128.CADAFUBP00009591	http://smart.embl.de/smart/DDt.cgi?smart=111:	Copper resistance protein Crd2, putative	5077099	A4DA78	A4DA78_ASPFU	AFUA_4G04318	CADAFUBG00009766	CADAFUBG00009766	CADAFUBP00009591	CADAFUBP00009591	CADAFUBT00009766	CADAFUBT00009766	Copper resistance protein Crd2, putative	Putative uncharacterized protein	Putative uncharacterized protein	XP_001481547	XP_001481547.1	afm:AFUA_4G04318
CADAFUBP00009610	746128.CADAFUBP00009610	https://smart.embl.de/smart/DDvec.cgi?smart=598:SH3(36|97)+SH3(158|216)+PX(321|435)+Pfam_PB1(521|596)+	Protein kinase activator Bem1, putative	3503940	AFUA_4G04120	CADAFUBG00009786	CADAFUBG00009786	CADAFUBP00009610	CADAFUBP00009610	CADAFUBT00009786	CADAFUBT00009786	Protein kinase activator Bem1, putative	Protein kinase activator Bem1, putative	Protein kinase activator Bem1, putative	Q4W9Q3	Q4W9Q3_ASPFU	XP_746598	XP_746598.2	afm:AFUA_4G04120
CADAFUBP00009646	746128.CADAFUBP00009646	https://smart.embl.de/smart/DDvec.cgi?smart=353:Pfam_GDC-P(83|316)+	Glycine cleavage system P protein; The glycine cleavage system catalyzes the degradation of glycine	1.4.4.2	3503937	AFUA_4G03760	CADAFUBG00009822	CADAFUBG00009822	CADAFUBP00009646	CADAFUBP00009646	CADAFUBT00009822	CADAFUBT00009822	EC 1.4.4.2	Glycine cleavage system P protein	Glycine dehydrogenase	Glycine dehydrogenase	Q4W9T8	Q4W9T8_ASPFU	XP_746563	XP_746563.1	afm:AFUA_4G03760
CADAFUBP00009657	746128.CADAFUBP00009657	https://smart.embl.de/smart/DDvec.cgi?smart=446:DnaJ(99|163)+Pfam_RAC_head(346|444)+	Ribosome associated DnaJ chaperone Zuotin, putative	3504018	AFUA_4G03650	CADAFUBG00009833	CADAFUBG00009833	CADAFUBP00009657	CADAFUBP00009657	CADAFUBT00009833	CADAFUBT00009833	Q4W9U9	Q4W9U9_ASPFU	XP_746552	XP_746552.1	afm:AFUA_4G03650
erg6	746128.CADAFUBP00009660	https://smart.embl.de/smart/DDvec.cgi?smart=377:Pfam_Methyltransf_29(87|254)+Pfam_Sterol_MT_C(312|377)+	Sterol 24-C-methyltransferase; Catalyzes the methyl transfer from S-adenosyl-methionine to the C-24 of lanosterol to form eburicol; Belongs to the class I-like SAM-binding methyltransferase superfamily. Erg6/SMT family	2.1.1.41	3504016	AFUA_4G03630	CADAFUBG00009836	CADAFUBG00009836	CADAFUBP00009660	CADAFUBP00009660	CADAFUBT00009836	CADAFUBT00009836	Delta(24)-sterol C-methyltransferase	EC 2.1.1.41	ERG6_ASPFU	Q4W9V1	Sterol 24-C-methyltransferase	Sterol 24-c-methyltransferase, putative	Sterol 24-c-methyltransferase, putative	XP_746550	XP_746550.1	afm:AFUA_4G03630	erg6
CADAFUBP00009823	746128.CADAFUBP00009823	https://smart.embl.de/smart/DDvec.cgi?smart=601:Pfam_GMC_oxred_N(4|316)+Pfam_GMC_oxred_C(454|593)+	Aryl-alcohol dehydrogenase, putative	3503777	AFUA_4G00610	Aryl-alcohol dehydrogenase, putative	Aryl-alcohol dehydrogenase, putative	Aryl-alcohol dehydrogenase, putative	CADAFUBG00010001	CADAFUBG00010001	CADAFUBP00009823	CADAFUBP00009823	CADAFUBT00010001	CADAFUBT00010001	Q4W984	Q4W984_ASPFU	XP_746395	XP_746395.1	afm:AFUA_4G00610
